# Supplementary material for: Epigenetic control of PDX1 and NGN3 by a computationally designed PRC2 inhibitor enforces pancreatic endocrine differentiation from pluripotent stem cells
Source: Research Square preprint supplement (doi:10.21203/rs.3.rs-9115136/v1), 2026-03-26
Supplement: Supplementary file 1 [file 4555dd7ae436e34ada2af770.xlsx]

## Sheet: Sheet1
Table S2- List of nearest neibhoring genes to the top 5% significant H3K27ac unique peaks in EBdCas9 + PDX1/NGN3 gRNAs
PeakID (cmd=annotatePeaks.pl /anvil/projects/x-bio250068/pancreatic/peaks_05/overlaps/Hunique_top0.05.peaks.bed hg38 -go)	Chr	Start	End	Strand	Peak Score	Focus Ratio/Region Size	Annotation	Detailed Annotation	Distance to TSS	Nearest PromoterID	Entrez ID	Nearest Unigene	Nearest Refseq	Nearest Ensembl	Gene Name	Gene Alias	Gene Description	Gene Type
30683	chr16	74366847	74366942	+	53	NA	intron (NR_026950, intron 1 of 14)	intron (NR_026950, intron 1 of 14)	1361	NR_026950	283922		NR_026950	ENSG00000290890	PDPR2P	-	pyruvate dehydrogenase phosphatase regulatory subunit 2, pseudogene	pseudo
68610	chr7	73826666	73826816	+	52	NA	Intergenic	MIRc|SINE|MIR	-4255	NM_001305	1364		NM_001305	ENSG00000189143	CLDN4	CPE-R|CPER|CPETR|CPETR1|WBSCR8|hCPE-R	claudin 4	protein-coding
24087	chr13	60165393	60165562	+	50	NA	Intergenic	MER90a|LTR|ERV1	-1492	NM_001258369	81624		NM_030932	ENSG00000139734	DIAPH3	AN|AUNA1|DIA2|DRF3|NSDAN|diap3|mDia2	diaphanous related formin 3	protein-coding
24066	chr3	50297514	50298406	+	44	NA	intron (NM_001200016, intron 1 of 1)	intron (NM_001200016, intron 1 of 1)	900	NM_001200018	24142		NM_012191	ENSG00000243477	NAA80	FUS-2|FUS2|HsNAAA80|NAT6	N-alpha-acetyltransferase 80, NatH catalytic subunit	protein-coding
16764	chr18	44801806	44802207	+	41	NA	intron (NM_001130110, intron 2 of 3)	intron (NM_001130110, intron 2 of 3)	101131	NM_001379142	26040		NM_015559	ENSG00000152217	SETBP1	MRD29|SEB	SET binding protein 1	protein-coding
57536	chr17	28729823	28729931	+	36	NA	intron (NM_178170, intron 1 of 14)	L2a|LINE|L2	1089	NM_178170	284086		NM_178170	ENSG00000160602	NEK8	JCK|NEK12A|NPHP9|RHPD2	NIMA related kinase 8	protein-coding
23378	chr11	118532810	118533656	+	35	NA	intron (NM_001144036, intron 3 of 6)	intron (NM_001144036, intron 3 of 6)	2041	NM_032780	84866		NM_032780	ENSG00000149582	TMEM25	-	transmembrane protein 25	protein-coding
14946	chr9	135993877	135994035	+	34	NA	Intergenic	Intergenic	-32583	NM_016172	10422		NM_016172	ENSG00000130560	UBAC1	GBDR1|KPC2|UBADC1	UBA domain containing 1	protein-coding
20216	chr19	27795140	27795243	+	32	NA	intron (NR_110690, intron 1 of 1)	intron (NR_110690, intron 1 of 1)	-1251	NR_027301	148189		NR_027301	ENSG00000261824	LINC00662	-	long intergenic non-protein coding RNA 662	ncRNA
20896	chr16	2146060	2146238	+	32	NA	Intergenic	Intergenic	-1995	NM_001308053	25837		NM_014353	ENSG00000167964	RAB26	V46133	RAB26, member RAS oncogene family	protein-coding
18589	chr10	103511134	103511501	+	30	NA	TTS (NR_120676)	TTS (NR_120676)	6125	NR_120675	102724341		NR_120675	ENSG00000235470	NEURL1-AS1	-	NEURL1 antisense RNA 1	ncRNA
42148	chr2	69800486	69800641	+	29	NA	intron (NM_001320698, intron 5 of 14)	L2c|LINE|L2	-1565	NR_164153	107985770		NR_164153	ENSG00000288869	SMANTIS	ANXA4-AS|n342419	SMARCA4 interacting SWI/SNF chromatin remodeling complex scaffold lncRNA	ncRNA
32185	chr4	158295938	158296046	+	29	NA	Intergenic	HERVK22-int|LTR|ERVK	85506	NM_018342	55314		NM_018342	ENSG00000164124	TMEM144	SLC35G7	transmembrane protein 144	protein-coding
13589	chr4	145181529	145181545	+	28	NA	promoter-TSS (NM_001366058)	promoter-TSS (NM_001366058)	-948	NM_001366058	54726		NM_017493	ENSG00000164164	OTUD4	DUBA6|HIN1|HSHIN1	OTU deubiquitinase 4	protein-coding
14016	chr17	72419483	72419493	+	28	NA	intron (NR_152515, intron 2 of 2)	intron (NR_152515, intron 2 of 2)	76677	NR_135222	146795		NR_135222	ENSG00000264026	LINC02003	-	long intergenic non-protein coding RNA 2003	ncRNA
8369-2	chr17	44308984	44309234	+	28	NA	promoter-TSS (NR_110802)	promoter-TSS (NR_110802)	508	NM_001144825	10900		NM_006695	ENSG00000108309	RUNDC3A	RAP2IP|RPIP-8|RPIP8	RUN domain containing 3A	protein-coding
8369	chr17	44308318	44308778	+	28	NA	promoter-TSS (NR_110802)	promoter-TSS (NR_110802)	-11	NM_001144826	10900		NM_006695	ENSG00000108309	RUNDC3A	RAP2IP|RPIP-8|RPIP8	RUN domain containing 3A	protein-coding
17762	chr14	24231505	24231513	+	27	NA	intron (NR_137631, intron 1 of 6)	intron (NR_137631, intron 1 of 6)	858	NM_006156	4738		NM_006156	ENSG00000129559	NEDD8	NEDD-8	NEDD8 ubiquitin like modifier	protein-coding
16175	chr8	70403039	70403512	+	27	NA	5' UTR (NM_001321712, exon 1 of 22)	5' UTR (NM_001321712, exon 1 of 22)	115	NM_001321713	10499		NM_006540	ENSG00000140396	NCOA2	GRIP1|KAT13C|NCoA-2|SRC2|TIF2|bHLHe75	nuclear receptor coactivator 2	protein-coding
4470	chr15	44715415	44715703	+	26	NA	exon (NM_004048, exon 2 of 4)	exon (NM_004048, exon 2 of 4)	-2285	NR_162102	113218500		NR_162102		MIR10393	-	microRNA 10393	ncRNA
20336	chr19	45885538	45885960	+	26	NA	exon (NM_015649, exon 1 of 1)	exon (NM_015649, exon 1 of 1)	392	NM_015649	26145		NM_015649	ENSG00000170604	IRF2BP1	-	interferon regulatory factor 2 binding protein 1	protein-coding
20822	chr7	2513293	2513774	+	26	NA	intron (NM_001166355, intron 2 of 8)	intron (NM_001166355, intron 2 of 8)	1004	NM_001166355	3955		NM_002304	ENSG00000106003	LFNG	SCDO3	LFNG O-fucosylpeptide 3-beta-N-acetylglucosaminyltransferase	protein-coding
6928	chr1	28329855	28329857	+	25	NA	intron (NM_017638, intron 1 of 2).2	MIR3|SINE|MIR	816	NM_017638	54797		NM_017638	ENSG00000130772	MED18	SRB5|p28b	mediator complex subunit 18	protein-coding
14302	chr9	91816375	91816394	+	25	NA	intron (NM_001318204, intron 1 of 7)	L2|LINE|L2	133844	NM_001318204	4920		NM_004560	ENSG00000169071	ROR2	BDB|BDB1|NTRKR2	receptor tyrosine kinase like orphan receptor 2	protein-coding
8591	chr12	642446	642643	+	25	NA	intron (NM_001367996, intron 1 of 4)	intron (NM_001367996, intron 1 of 4)	1092	NM_001367996	4815		NM_016533	ENSG00000171840	NINJ2	-	ninjurin 2	protein-coding
9116	chr9	127660852	127661793	+	25	NA	intron (NM_001374306, intron 6 of 18)	intron (NM_001374306, intron 6 of 18)	29473	NR_037473	100500872		NR_037473	ENSG00000283874	MIR3911	mir-3911	microRNA 3911	ncRNA
14275	chr1	153922536	153922537	+	25	NA	intron (NM_020699, intron 1 of 10)	CpG	436	NM_020699	57459		NM_020699	ENSG00000143614	GATAD2B	GANDS|MRD18|P66beta|p68	GATA zinc finger domain containing 2B	protein-coding
13287	chr10	30521438	30522181	+	24	NA	Intergenic	L1MB3|LINE|L1	87163	NM_001320961	1326		NM_005204	ENSG00000107968	MAP3K8	AURA2|COT|EST|ESTF|MEKK8|TPL2|Tpl-2|c-COT	mitogen-activated protein kinase kinase kinase 8	protein-coding
12746	chr11	1829255	1829806	+	24	NA	Intergenic	Intergenic	-4897	NM_001290333	90019		NM_138567	ENSG00000149043	SYT8	-	synaptotagmin 8	protein-coding
6458	chr16	83926548	83927245	+	24	NA	3' UTR (NM_012213, exon 5 of 5)	3' UTR (NM_012213, exon 5 of 5)	-26344	NM_182981	29948		NM_013370	ENSG00000140961	OSGIN1	BDGI|OKL38	oxidative stress induced growth inhibitor 1	protein-coding
6863	chr11	117704515	117705142	+	23	NA	intron (NM_020693, intron 3 of 32)	intron (NM_020693, intron 3 of 32)	92388	NM_020693	57453		NM_020693	ENSG00000177103	DSCAML1	DSCAM2	DS cell adhesion molecule like 1	protein-coding
16280	chr1	154609051	154609379	+	23	NA	promoter-TSS (NM_001365048)	promoter-TSS (NM_001365048)	-418	NM_001365048	103		NM_001111	ENSG00000160710	ADAR	ADAR1|AGS6|DRADA|DSH|DSRAD|G1P1|IFI-4|IFI4|K88DSRBP|P136	adenosine deaminase RNA specific	protein-coding
9308	chr3	11601347	11601808	+	23	NA	intron (NM_001284391, intron 2 of 4)	intron (NM_001284391, intron 2 of 4)	3004	NM_001284391	9686		NM_014667	ENSG00000144560	VGLL4	VGL-4	vestigial like family member 4	protein-coding
8452	chr7	44020115	44020116	+	22	NA	promoter-TSS (NR_003655)	promoter-TSS (NR_003655)	-921	NR_003655	84820		NM_032734	ENSG00000214783	POLR2J4	RPB11-phi	RNA polymerase II subunit J4 (pseudogene)	pseudo
3210-3	chr11	1760985	1761476	+	22	NA	intron (NM_001909, intron 2 of 8)	intron (NM_001909, intron 2 of 8)	2697	NM_001909	1509		NM_001909	ENSG00000117984	CTSD	CLN10|CPSD|HEL-S-130P	cathepsin D	protein-coding
5452	chr2	65329340	65330148	+	22	NA	intron (NM_181784, intron 4 of 5)	intron (NM_181784, intron 4 of 5)	37034	NM_001128210	200734		NM_181784	ENSG00000198369	SPRED2	NS14|Spred-2	sprouty related EVH1 domain containing 2	protein-coding
13443	chr13	49586543	49586545	+	22	NA	promoter-TSS (NR_148016)	promoter-TSS (NR_148016)	-961	NM_001352504	55213		NM_018191	ENSG00000136144	RCBTB1	CLLD7|CLLL7|GLP|RDEOA	RCC1 and BTB domain containing protein 1	protein-coding
4081-3	chr3	8539200	8539778	+	21	NA	intron (NM_014583, intron 3 of 5)	intron (NM_014583, intron 3 of 5)	-32293	NR_024065	29931		NM_013343		LINC00312	ERR-10|ERR10|LMCD1DN|LOH3CR2A|NAG-7|NAG7|NCRNA00312	long intergenic non-protein coding RNA 312	ncRNA
3384-3	chr22	31107705	31108136	+	21	NA	promoter-TSS (NM_080430)	promoter-TSS (NM_080430)	-352	NM_080430	140606		NM_080430	ENSG00000198832	SELENOM	SELM|SEPM	selenoprotein M	protein-coding
12666	chr1	9401654	9401834	+	21	NA	Intergenic	MIR|SINE|MIR	27172	NR_104623	100506022		NR_104622	ENSG00000284693	LINC02606	-	long intergenic non-protein coding RNA 2606	ncRNA
1500-11	chr18	80258294	80258425	+	21	NA	Intergenic	G-rich|Low_complexity|Low_complexity	-10845	NM_032510	84552		NM_032510	ENSG00000178184	PARD6G	PAR-6G|PAR6gamma	par-6 family cell polarity regulator gamma	protein-coding
2780-3	chr2	242183379	242183531	+	21	NA	Intergenic	(AGGGTT)n|Simple_repeat|Simple_repeat	94822	NR_130699	728323		NR_024437		LINC01881	-	long intergenic non-protein coding RNA 1881	ncRNA
6365	chr13	28464553	28465570	+	21	NA	intron (NM_002019, intron 3 of 29)	intron (NM_002019, intron 3 of 29)	30067	NM_002019	2321		NM_002019	ENSG00000102755	FLT1	FLT|FLT-1|VEGFR-1|VEGFR1	fms related receptor tyrosine kinase 1	protein-coding
6186	chr17	41071778	41072529	+	21	NA	intron (NM_001277332, intron 5 of 5)	intron (NM_001277332, intron 5 of 5)	-6274	NM_033184	85294		NM_033184	ENSG00000213417	KRTAP2-4	KAP2.1B|KAP2.3|KAP2.4|KRTAP2-3|KRTAP2.3|KRTAP2.4	keratin associated protein 2-4	protein-coding
8972	chrY	6899271	6899381	+	21	NA	Intergenic	Intergenic	-11360	NM_134259	90665		NM_033284	ENSG00000092377	TBL1Y	DFNY2|TBL1	transducin beta like 1 Y-linked	protein-coding
6341	chr5	53482761	53483487	+	21	NA	intron (NM_006350, intron 2 of 5)	intron (NM_006350, intron 2 of 5)	2495	NM_013409	10468		NM_006350	ENSG00000134363	FST	FS	follistatin	protein-coding
7384	chr17	41149189	41150080	+	20	NA	exon (NM_033188, exon 1 of 1)	exon (NM_033188, exon 1 of 1)	191	NM_033188	85289		NM_033188	ENSG00000198271	KRTAP4-5	KAP4.5|KRTAP4.5	keratin associated protein 4-5	protein-coding
5242	chr2	17830486	17831070	+	20	NA	Intergenic	Intergenic	14318	NM_001105569	343930		NM_001105569	ENSG00000151379	MSGN1	MSOG|pMsgn1	mesogenin 1	protein-coding
4621	chr11	60370451	60370956	+	20	NA	Intergenic	Intergenic	-7782	NM_206938	58475		NM_021201	ENSG00000166927	MS4A7	4SPAN2|CD20L4|CFFM4|MS4A8	membrane spanning 4-domains A7	protein-coding
5052	chr12	95789263	95790093	+	20	NA	intron (NM_001329701, intron 1 of 9)	intron (NM_001329701, intron 1 of 9)	517	NM_001329702	59277		NM_021229	ENSG00000074527	NTN4	PRO3091	netrin 4	protein-coding
11901	chr2	239300783	239300883	+	20	NA	intron (NM_006037, intron 2 of 26)	intron (NM_006037, intron 2 of 26)	-4629	NR_036229	100423043		NR_036229	ENSG00000265215	MIR4269	-	microRNA 4269	ncRNA
5679	chr9	132079212	132079874	+	20	NA	intron (NM_001253881, intron 1 of 6)	intron (NM_001253881, intron 1 of 6)	324	NM_004269	9442		NM_004269	ENSG00000160563	MED27	CRAP34|CRSP34|CRSP8|MED3|NEDSCAC|TRAP37	mediator complex subunit 27	protein-coding
7861	chr3	154684147	154685042	+	20	NA	Intergenic	L1PBa1|LINE|L1	-254404	NM_001038705	344758		NM_001038705	ENSG00000174948	GPR149	IEDA|PGR10|R35	G protein-coupled receptor 149	protein-coding
2919-4	chr16	56194219	56194824	+	20	NA	promoter-TSS (NR_026889)	promoter-TSS (NR_026889)	4	NR_026889	26077		NR_026889	ENSG00000261439	GNAO1-AS1	DKFZP434H168	GNAO1 antisense RNA 1	ncRNA
2705	chr12	101830929	101831166	+	20	NA	promoter-TSS (NM_024312)	promoter-TSS (NM_024312)	-88	NM_024312	79158		NM_024312	ENSG00000111670	GNPTAB	GNPTA|ICD	N-acetylglucosamine-1-phosphate transferase subunits alpha and beta	protein-coding
6258	chr22	23432998	23433983	+	20	NA	promoter-TSS (NR_110538)	promoter-TSS (NR_110538)	-74	NR_110538	101929374		NR_110538	ENSG00000234928	LINC01659	-	long intergenic non-protein coding RNA 1659	ncRNA
3904	chr19	46737731	46737969	+	20	NA	intron (NM_001039877, intron 3 of 17)	intron (NM_001039877, intron 3 of 17)	-8207	NM_024301	79147		NM_024301	ENSG00000181027	FKRP	FKTR|LGMD2I|LGMDR9|MDC1C|MDDGA5|MDDGB5|MDDGC5	fukutin related protein	protein-coding
4215	chr21	43771161	43771531	+	19	NA	Intergenic	Intergenic	4962	NM_000100	1476		NM_000100	ENSG00000160213	CSTB	CPI-B|CST6|EPM1|EPM1A|PME|STFB|ULD	cystatin B	protein-coding
7277	chr16	64380806	64381668	+	19	NA	Intergenic	MER52A|LTR|ERV1	740826	NM_001308392	1009		NM_001797	ENSG00000140937	CDH11	CAD11|CDHOB|ESWS|OB|OSF-4|TBHS2	cadherin 11	protein-coding
4544	chr17	72173454	72174021	+	19	NA	Intergenic	Intergenic	52717	NM_000346	6662		NM_000346	ENSG00000125398	SOX9	CMD1|CMPD1|SRA1|SRXX2|SRXY10	SRY-box transcription factor 9	protein-coding
17197	chrY	3005935	3006252	+	19	NA	intron (NR_046502, intron 1 of 3)	LTR4|LTR|ERV1	3097	NR_046502	100873962		NR_046502	ENSG00000231535	LINC00278	NCRNA00278|YY1BM	long intergenic non-protein coding RNA 278	ncRNA
13258	chr10	79228031	79228038	+	19	NA	intron (NM_020338, intron 7 of 24)	intron (NM_020338, intron 7 of 24)	-119435	NM_005729	10105		NM_005729	ENSG00000108179	PPIF	CYP3|CyP-M|Cyp-D|CypD	peptidylprolyl isomerase F	protein-coding
3668-2	chrX	50470414	50471027	+	19	NA	5' UTR (NM_001013742, exon 1 of 28)	5' UTR (NM_001013742, exon 1 of 28)	105	NM_001013742	139189		NM_001013742	ENSG00000274588	DGKK	-	diacylglycerol kinase kappa	protein-coding
9299	chr3	48432282	48432290	+	19	NA	3' UTR (NM_001256967, exon 4 of 4)	3' UTR (NM_001256967, exon 4 of 4)	-2200	NM_001130082	5364		NM_002673	ENSG00000164050	PLXNB1	PLEXIN-B1|PLXN5|SEP	plexin B1	protein-coding
5033	chr8	22999840	23000317	+	19	NA	5' UTR (NM_015178, exon 1 of 10)	5' UTR (NM_015178, exon 1 of 10)	530	NM_015178	23221		NM_015178	ENSG00000008853	RHOBTB2	DBC2|DEE64|EIEE64|p83	Rho related BTB domain containing 2	protein-coding
4091	chr1	48494382	48495025	+	19	NA	Intergenic	Intergenic	-22495	NM_001286239	54558		NM_019073	ENSG00000132122	SPATA6	HASH|SRF-1|SRF1	spermatogenesis associated 6	protein-coding
5327	chr17	64085394	64086073	+	19	NA	intron (NM_001433, intron 2 of 21)	intron (NM_001433, intron 2 of 21)	44411	NM_001433	2081		NM_001433	ENSG00000178607	ERN1	IRE1|IRE1P|IRE1a|hIRE1p	endoplasmic reticulum to nucleus signaling 1	protein-coding
5231	chr6	138529442	138529904	+	19	NA	intron (NM_020464, intron 1 of 6)	MLT1E2|LTR|ERVL-MaLR	-30179	NM_001144060	57224		NM_020464	ENSG00000135540	NHSL1	C6orf63	NHS like 1	protein-coding
5025	chr1	1943908	1944549	+	19	NA	intron (NM_001304360, intron 21 of 38)	CpG	-24949	NM_178545	339456		NM_178545	ENSG00000178821	TMEM52	-	transmembrane protein 52	protein-coding
6899	chr10	125017583	125018222	+	19	NA	intron (NM_001083914, intron 3 of 10)	intron (NM_001083914, intron 3 of 10)	10169	NM_022802	1488		NM_001329	ENSG00000175029	CTBP2	-	C-terminal binding protein 2	protein-coding
2768-2	chr6	98948068	98948395	+	19	NA	promoter-TSS (NM_001278716)	promoter-TSS (NM_001278716)	-225	NM_012160	26235		NM_012160	ENSG00000112234	FBXL4	FBL4|FBL5|MTDPS13	F-box and leucine rich repeat protein 4	protein-coding
4404	chr1	219405633	219406087	+	19	NA	Intergenic	Intergenic	151464	NR_135822	102723886		NR_135822		LYPLAL1-AS1	-	LYPLAL1 antisense RNA 1	ncRNA
9582	chr7	23274058	23274085	+	18	NA	exon (NM_002510, exon 11 of 11)	exon (NM_002510, exon 11 of 11)	-25268	NM_138446	115416		NM_138446	ENSG00000156928	MALSU1	C7orf30|mtRsfA	mitochondrial assembly of ribosomal large subunit 1	protein-coding
12322	chr1	28260954	28261138	+	18	NA	intron (NM_031459, intron 1 of 9)	intron (NM_031459, intron 1 of 9)	1528	NM_031459	83667		NM_031459	ENSG00000130766	SESN2	HI95|SES2|SEST2	sestrin 2	protein-coding
5398	chr9	117413882	117414619	+	18	NA	intron (NM_014010, intron 1 of 21)	CpG	807	NM_001365069	23245		NM_014010	ENSG00000148219	ASTN2	bA67K19.1	astrotactin 2	protein-coding
5212	chr6	7898888	7899531	+	18	NA	intron (NR_037616, intron 6 of 12)	intron (NR_037616, intron 6 of 12)	10868	NM_001145549	81567		NM_022085	ENSG00000239264	TXNDC5	ENDOPDI|ERP46|HCC-2|HCC2|PDIA15|STRF8|UNQ364	thioredoxin domain containing 5	protein-coding
2954	chr1	153510904	153511321	+	18	NA	Intergenic	Intergenic	24879	NM_014624	6277		NM_014624	ENSG00000197956	S100A6	2A9|5B10|CABP|CACY|PRA|S10A6	S100 calcium binding protein A6	protein-coding
3005-2	chr21	43774010	43774339	+	18	NA	3' UTR (NM_000100, exon 3 of 3)	3' UTR (NM_000100, exon 3 of 3)	2134	NM_000100	1476		NM_000100	ENSG00000160213	CSTB	CPI-B|CST6|EPM1|EPM1A|PME|STFB|ULD	cystatin B	protein-coding
4015	chr1	11522516	11522921	+	18	NA	intron (NM_020780, intron 10 of 20)	intron (NM_020780, intron 10 of 20)	43563	NM_020780	57540		NM_020780	ENSG00000204624	DISP3	PTCHD2	dispatched RND transporter family member 3	protein-coding
3888	chr1	205485373	205485779	+	18	NA	Intergenic	Intergenic	-19093	NM_212503	5129		NM_002596	ENSG00000117266	CDK18	PCTAIRE|PCTAIRE3|PCTK3	cyclin dependent kinase 18	protein-coding
3695	chr19	18683569	18683911	+	18	NA	promoter-TSS (NM_001098482)	promoter-TSS (NM_001098482)	60	NM_015321	23373		NM_015321	ENSG00000105662	CRTC1	MAML2|MECT1|Mam-2|TORC-1|TORC1|WAMTP1	CREB regulated transcription coactivator 1	protein-coding
3820-2	chr7	69599344	69599681	+	18	NA	5' UTR (NM_001127231, exon 1 of 18)	5' UTR (NM_001127231, exon 1 of 18)	1037	NM_015570	26053		NM_015570	ENSG00000158321	AUTS2	FBRSL2|MRD26	activator of transcription and developmental regulator AUTS2	protein-coding
4025	chr1	46611190	46611388	+	18	NA	intron (NM_201403, intron 2 of 3)	MIRb|SINE|MIR	3844	NM_145279	148932		NM_145279	ENSG00000142961	MOB3C	MOB1E|MOBKL2C	MOB kinase activator 3C	protein-coding
5424	chr16	2985857	2986279	+	18	NA	Intergenic	Intergenic	-2986	NR_033861	283875		NM_001396456	ENSG00000262152	GREP1	G029442|LA16c-380H5.1|LA16c-380H5.3|LINC00514	glycine rich extracellular protein 1	protein-coding
4954	chr7	140512381	140512901	+	18	NA	Intergenic	Intergenic	-33072	NM_001145125	23608		NM_013446	ENSG00000133606	MKRN1	RNF61	makorin ring finger protein 1	protein-coding
5038	chr5	63931726	63932443	+	18	NA	Intergenic	Intergenic	30361	NM_000524	3350		NM_000524	ENSG00000178394	HTR1A	5-HT-1A|5-HT1A|5HT1a|ADRB2RL1|ADRBRL1|G-21|PFMCD	5-hydroxytryptamine receptor 1A	protein-coding
10231	chr2	25258052	25258122	+	18	NA	intron (NR_135490, intron 6 of 23)	intron (NR_135490, intron 6 of 23)	-5772	NM_153759	1788		NM_022552	ENSG00000119772	DNMT3A	DNMT3A2|HESJAS|M.HsaIIIA|TBRS	DNA methyltransferase 3 alpha	protein-coding
5424-2	chr16	2986495	2986611	+	18	NA	Intergenic	Intergenic	-2501	NR_033861	283875		NM_001396456	ENSG00000262152	GREP1	G029442|LA16c-380H5.1|LA16c-380H5.3|LINC00514	glycine rich extracellular protein 1	protein-coding
3378-2	chr21	43859931	43860146	+	18	NA	Intergenic	MER41A|LTR|ERV1	-5185	NM_001369881	56894		NM_020132	ENSG00000160216	AGPAT3	1-AGPAT 3|LPAAT-GAMMA1|LPAAT3|LPLAT3	1-acylglycerol-3-phosphate O-acyltransferase 3	protein-coding
4025-2	chr1	46611669	46611795	+	18	NA	intron (NM_201403, intron 2 of 3)	intron (NM_201403, intron 2 of 3)	3401	NM_145279	148932		NM_145279	ENSG00000142961	MOB3C	MOB1E|MOBKL2C	MOB kinase activator 3C	protein-coding
8601	chr10	69448232	69449153	+	18	NA	Intergenic	Intergenic	-2773	NM_012339	23555		NM_012339	ENSG00000099282	TSPAN15	2700063A19Rik|NET-7|NET7|TM4SF15	tetraspanin 15	protein-coding
5285	chr11	7665476	7666007	+	18	NA	intron (NM_016229, intron 8 of 8)	intron (NM_016229, intron 8 of 8)	7150	NM_001302827	51700		NM_016229	ENSG00000166394	CYB5R2	B5R.2	cytochrome b5 reductase 2	protein-coding
17037	chr10	71972410	71972821	+	18	NA	intron (NM_004273, intron 1 of 2)	intron (NM_004273, intron 1 of 2)	8220	NM_004273	9469		NM_004273	ENSG00000122863	CHST3	C6ST|C6ST1|HSD	carbohydrate sulfotransferase 3	protein-coding
5017	chr12	32398407	32399204	+	18	NA	promoter-TSS (NM_001384126)	promoter-TSS (NM_001384126)	-753	NM_001370298	121512		NM_139241	ENSG00000139132	FGD4	CMT4H|FRABP|ZFYVE6	FYVE, RhoGEF and PH domain containing 4	protein-coding
4270	chr16	23149448	23149883	+	18	NA	promoter-TSS (NM_020718)	promoter-TSS (NM_020718)	-395	NM_020718	57478		NM_020718	ENSG00000103404	USP31	-	ubiquitin specific peptidase 31	protein-coding
4730	chr1	97348537	97349060	+	18	NA	intron (NM_000110, intron 16 of 22)	intron (NM_000110, intron 16 of 22)	252875	NR_046590	100873932		NR_046590	ENSG00000232878	DPYD-AS1	-	DPYD antisense RNA 1	ncRNA
2420-3	chr8	97424887	97425168	+	17	NA	intron (NR_125390, intron 1 of 2)	MIRb|SINE|MIR	21470	NR_125390	101927066		NR_125390		LOC101927066	-	uncharacterized LOC101927066	ncRNA
4590	chr1	167198412	167198981	+	17	NA	Intergenic	Intergenic	-2891	NR_110811	101928484		NR_110811	ENSG00000231605	LINC01363	RBSG4	long intergenic non-protein coding RNA 1363	ncRNA
3516	chr22	42916516	42917055	+	17	NA	intron (NM_001184970, intron 1 of 10)	intron (NM_001184970, intron 1 of 10)	30256	NM_007229	11252		NM_007229	ENSG00000100266	PACSIN2	SDPII	protein kinase C and casein kinase substrate in neurons 2	protein-coding
4412	chr4	5887140	5887590	+	17	NA	intron (NM_001014809, intron 1 of 13)	intron (NM_001014809, intron 1 of 13)	448	NM_001288662	1400		NM_001313	ENSG00000072832	CRMP1	CRMP-1|DPYSL1|DRP-1|DRP1|ULIP-3	collapsin response mediator protein 1	protein-coding
3844	chr13	101893097	101893567	+	17	NA	intron (NM_175929, intron 1 of 4)	L2c|LINE|L2	23613	NM_004115	2259		NM_004115	ENSG00000102466	FGF14	FGF-14|FHF-4|FHF4|NYS4|SCA27|SCA27A|SCA27B	fibroblast growth factor 14	protein-coding
5322	chr17	45006073	45006668	+	17	NA	Intergenic	MIR3|SINE|MIR	-38067	NM_006688	10882		NM_006688	ENSG00000131094	C1QL1	C1QRF|C1QTNF14|CRF|CTRP14	complement C1q like 1	protein-coding
2865-3	chr2	227472738	227473112	+	17	NA	TTS (NR_049888)	TTS (NR_049888)	769	NM_001135189	3267		NM_004504	ENSG00000173744	AGFG1	HRB|RAB|RIP	ArfGAP with FG repeats 1	protein-coding
3333	chr16	47144334	47144751	+	17	NA	promoter-TSS (NM_018092)	promoter-TSS (NM_018092)	474	NR_110904	101927102		NR_110903		ITFG1-AS1	-	ITFG1 antisense RNA 1	ncRNA
3807	chr13	26663818	26664194	+	17	NA	intron (NM_006646, intron 3 of 9)	intron (NM_006646, intron 3 of 9)	96780	NM_005288	2835		NM_005288	ENSG00000132975	GPR12	GPCR12|GPCR21|PPP1R84	G protein-coupled receptor 12	protein-coding
2930-3	chr17	44352676	44353213	+	17	NA	TTS (NM_198475)	TTS (NM_198475)	7642	NM_002087	2896		NM_002087	ENSG00000030582	GRN	CLN11|GEP|GP88|PCDGF|PEPI|PGRN	granulin precursor	protein-coding
8544	chr5	14727103	14727199	+	17	NA	intron (NM_054027, intron 8 of 11)	intron (NM_054027, intron 8 of 11)	14457	NR_046285	100130744		NR_046285		LOC100130744	-	uncharacterized LOC100130744	ncRNA
5907	chr6	6699766	6700575	+	17	NA	Intergenic	Intergenic	-77344	NR_026970	285780		NM_173675	ENSG00000216863	LY86-AS1	LY86-AS|LY86AS	LY86 antisense RNA 1	ncRNA
3991	chr1	155014371	155014936	+	17	NA	intron (NM_001377452, intron 3 of 4)	intron (NM_001377452, intron 3 of 4)	11851	NM_001256455	51043		NM_001252406	ENSG00000160685	ZBTB7B	CKROX|THPOK|ZBTB15|ZFP-67|ZFP67|ZNF857B|c-KROX|hcKROX|vGAF	zinc finger and BTB domain containing 7B	protein-coding
3631	chr17	43560705	43560850	+	17	NA	Intergenic	Intergenic	-14437	NM_001079675	2118		NM_001986	ENSG00000175832	ETV4	E1A-F|E1AF|PEA3|PEAS3	ETS variant transcription factor 4	protein-coding
3473	chr6	156883133	156883922	+	17	NA	intron (NM_001371656, intron 4 of 20)	(CCTTT)n|Simple_repeat|Simple_repeat	-103796	NR_039676	100616154		NR_039676	ENSG00000271899	MIR4466	mir-4466	microRNA 4466	ncRNA
4921	chr15	45161852	45162566	+	17	NA	intron (NM_175940, intron 30 of 33)	intron (NM_175940, intron 30 of 33)	18998	NM_001301171	90525		NM_138356	ENSG00000138606	SHF	-	Src homology 2 domain containing F	protein-coding
3442	chr12	112022192	112022649	+	17	NA	exon (NM_006817, exon 3 of 3)	exon (NM_006817, exon 3 of 3)	8994	NM_006817	10961		NM_006817	ENSG00000089248	ERP29	C12orf8|ERp28|ERp31|HEL-S-107|PDI-DB|PDIA9	endoplasmic reticulum protein 29	protein-coding
2737-3	chr9	122213725	122214216	+	17	NA	intron (NM_199160, intron 7 of 8)	CpG-28726	7770	NM_001242335	26468		NM_014368	ENSG00000106852	LHX6	LHX6.1|hLHX6	LIM homeobox 6	protein-coding
5604	chr16	2968543	2969307	+	17	NA	promoter-TSS (NM_001284512)	promoter-TSS (NM_001284512)	-423	NM_001284512	124222		NM_152341	ENSG00000162073	PAQR4	-	progestin and adipoQ receptor family member 4	protein-coding
7551	chr12	49322137	49322151	+	17	NA	intron (NR_120449, intron 2 of 7)	intron (NR_120449, intron 2 of 7)	-1111	NM_001100620	10024		NM_005480	ENSG00000135451	TROAP	TASTIN	trophinin associated protein	protein-coding
3499-3	chr4	142940523	142940987	+	17	NA	Intergenic	MamRTE1|LINE|RTE-BovB	-94220	NM_001331040	8821		NM_003866	ENSG00000109452	INPP4B	-	inositol polyphosphate-4-phosphatase type II B	protein-coding
6689	chr4	101790401	101791416	+	17	NA	exon (NM_001127507, exon 1 of 16)	exon (NM_001127507, exon 1 of 16)	178	NM_017935	55024		NM_017935	ENSG00000153064	BANK1	BANK	B cell scaffold protein with ankyrin repeats 1	protein-coding
2988	chr15	90031572	90031788	+	17	NA	intron (NM_198526, intron 1 of 4)	intron (NM_198526, intron 1 of 4)	24925	NR_036135	100422841		NR_036135	ENSG00000265871	MIR3174	-	microRNA 3174	ncRNA
6351	chr12	109716710	109717845	+	17	NA	intron (NM_032829, intron 1 of 2)	intron (NM_032829, intron 1 of 2)	3452	NM_032829	84915		NM_032829	ENSG00000139438	FAM222A	C12orf34	family with sequence similarity 222 member A	protein-coding
5413	chr10	118965112	118965941	+	17	NA	Intergenic	Intergenic	-64188	NM_199461	340719		NM_199461	ENSG00000188613	NANOS1	EC_Rep1a|NOS-1|NOS1|SPGF12|ZC2HC12A	nanos C2HC-type zinc finger 1	protein-coding
4650	chr9	126422089	126422372	+	17	NA	intron (NM_033446, intron 7 of 9)	intron (NM_033446, intron 7 of 9)	-11726	NR_045006	641373		NR_045006		NRON	NCRNA00194	non-coding repressor of NFAT	ncRNA
7308	chr15	40911005	40912070	+	17	NA	Intergenic	Intergenic	4728	NR_135836	105370943		NR_135836		LOC105370943	-	uncharacterized LOC105370943	ncRNA
2853	chr16	74813128	74813509	+	17	NA	Intergenic	Intergenic	-38498	NM_024306	79152		NM_024306	ENSG00000103089	FA2H	FAAH|FAH1|FAXDC1|SCS7|SPG35	fatty acid 2-hydroxylase	protein-coding
4363	chr6	15247862	15248259	+	17	NA	promoter-TSS (NM_001267040)	promoter-TSS (NM_001267040)	636	NR_120502	100506681		NR_120502	ENSG00000235488	JARID2-AS1	-	JARID2 antisense RNA 1	ncRNA
4087	chr12	109864083	109864774	+	17	NA	intron (NM_016433, intron 1 of 4)	MIRb|SINE|MIR	16113	NM_016433	51228		NM_016433	ENSG00000139433	GLTP	-	glycolipid transfer protein	protein-coding
2686	chr12	83473651	83474224	+	17	NA	Intergenic	MIR|SINE|MIR	786782	NM_001320322	160335		NM_152588	ENSG00000179104	TMTC2	IBDBP1	transmembrane O-mannosyltransferase targeting cadherins 2	protein-coding
6286	chr7	44036217	44037241	+	17	NA	non-coding (NR_024116, exon 5 of 9)	non-coding (NR_024116, exon 5 of 9)	-2320	NR_072982	255031		NR_015401		LINC00957	-	long intergenic non-protein coding RNA 957	ncRNA
8417	chr7	46015250	46016180	+	17	NA	Intergenic	L1PA8A|LINE|L1	-94443	NM_001013398	3486		NM_000598	ENSG00000146674	IGFBP3	BP-53|IBP-3|IBP3|IGFBP-3	insulin like growth factor binding protein 3	protein-coding
2133-2	chr10	71821843	71822014	+	17	NA	exon (NM_001042465, exon 9 of 15)	exon (NM_001042465, exon 9 of 15)	10045	NM_001171935	64072		NM_022124	ENSG00000107736	CDH23	CDHR23|PITA5|USH1D	cadherin related 23	protein-coding
2603	chr13	113262780	113263183	+	16	NA	promoter-TSS (NR_107042)	promoter-TSS (NR_107042)	61	NR_107042	102465874		NR_107042	ENSG00000277942	MIR8075	hsa-mir-8075	microRNA 8075	ncRNA
4293-2	chr1	41919827	41920296	+	16	NA	intron (NR_038261, intron 1 of 3)	intron (NR_038261, intron 1 of 3)	-1139	NR_038260	59269		NM_024503	ENSG00000127124	HIVEP3	KBP-1|KBP1|KRC|SHN3|Schnurri-3|ZAS3|ZNF40C	HIVEP zinc finger 3	protein-coding
4693	chr18	32378543	32379421	+	16	NA	intron (NM_022751, intron 2 of 5)	intron (NM_022751, intron 2 of 5)	91900	NM_001242409	64762		NM_022751	ENSG00000141441	GAREM1	C18orf11|FAM59A|GAREM|Gm944	GRB2 associated regulator of MAPK1 subtype 1	protein-coding
7682	chr2	213922854	213924326	+	16	NA	intron (NM_024532, intron 11 of 15)	L1PA14|LINE|L1	165523	NR_039640	100616375		NR_039640	ENSG00000265734	MIR4438	-	microRNA 4438	ncRNA
7370-2	chr2	126656801	126656828	+	16	NA	intron (NM_016815, intron 1 of 2)	intron (NM_016815, intron 1 of 2)	656	NM_002101	2995		NM_002101	ENSG00000136732	GYPC	CD236|CD236R|GE|GPC|GPD|GYPD|PAS-2|PAS-2'	glycophorin C (Gerbich blood group)	protein-coding
3817	chr14	76836108	76836554	+	16	NA	intron (NR_169573, intron 4 of 12)	intron (NR_169573, intron 4 of 12)	9923	NM_001385108	145497		NM_194287	ENSG00000100565	LRRC74A	C14orf166B|LRRC74	leucine rich repeat containing 74A	protein-coding
3891	chr8	143635534	143636055	+	16	NA	promoter-TSS (NM_001261843)	promoter-TSS (NM_001261843)	-225	NM_001261843	9831		NM_014789	ENSG00000183309	ZNF623	-	zinc finger protein 623	protein-coding
6271	chr11	1681759	1681814	+	16	NA	Intergenic	L1MD2|LINE|L1	3843	NR_026642	100132464		NR_026642	ENSG00000205865	FAM99B	-	family with sequence similarity 99 member B	ncRNA
4407	chr1	226656286	226656871	+	16	NA	non-coding (NR_103784, exon 2 of 2)	non-coding (NR_103784, exon 2 of 2)	18490	NR_103784	100506443		NR_103784	ENSG00000228382	ITPKB-IT1	-	ITPKB intronic transcript 1	ncRNA
9874	chr11	65540232	65542039	+	16	NA	exon (NM_001164266, exon 20 of 27)	exon (NM_001164266, exon 20 of 27)	16052	NM_001048218	57410		NM_020680	ENSG00000142186	SCYL1	GKLP|HT019|NKTL|NTKL|P105|SCAR21|TAPK|TEIF|TRAP	SCY1 like pseudokinase 1	protein-coding
3573-3	chr8	142624128	142624593	+	16	NA	Intergenic	(GTCCCT)n|Simple_repeat|Simple_repeat	-9881	NM_015193	23237		NM_015193	ENSG00000198576	ARC	Arg3.1|hArc	activity regulated cytoskeleton associated protein	protein-coding
3412	chr22	39437367	39437696	+	16	NA	TTS (NR_040535)	TTS (NR_040535)	5371	NR_040535	100506472		NR_040535		LOC100506472	-	uncharacterized LOC100506472	ncRNA
4506-2	chr2	211390423	211390759	+	16	NA	intron (NM_005235, intron 25 of 27)	intron (NM_005235, intron 25 of 27)	773020	NR_002763	29034		NM_014116	ENSG00000280837	CPS1-IT1	CPS1-IT|CPS1IT|CPS1IT1|PRO0132	CPS1 intronic transcript 1	ncRNA
3912	chr10	46443058	46443475	+	16	NA	intron (NR_033957, intron 1 of 3)	AluSz|SINE|Alu	22615	NM_001278794	5540		NM_005972	ENSG00000204174	NPY4R	NPY4-R|PP1|PPYR1|Y4	neuropeptide Y receptor Y4	protein-coding
5933-2	chr12	84912319	84913443	+	16	NA	promoter-TSS (NM_182767)	promoter-TSS (NM_182767)	-52	NM_018057	55117		NM_018057	ENSG00000072041	SLC6A15	NTT73|SBAT1|V7-3|hv7-3	solute carrier family 6 member 15	protein-coding
17761	chr19	38033434	38034339	+	16	NA	intron (NM_015073, intron 2 of 21)	intron (NM_015073, intron 2 of 21)	126678	NM_015073	23094		NM_015073	ENSG00000105738	SIPA1L3	CTRCT45|SPAL3|SPAR3	signal induced proliferation associated 1 like 3	protein-coding
6461	chr17	42540962	42542105	+	16	NA	intron (NM_000263, intron 5 of 5)	intron (NM_000263, intron 5 of 5)	5292	NM_000263	4669		NM_000263	ENSG00000108784	NAGLU	CMT2V|MPS-IIIB|MPS3B|NAG|UFHSD	N-acetyl-alpha-glucosaminidase	protein-coding
1503-12	chr6	95596165	95596332	+	16	NA	intron (NM_024641, intron 2 of 4)	L1MC2|LINE|L1	18713	NM_024641	79694		NM_024641	ENSG00000172469	MANEA	ENDO|hEndo	mannosidase endo-alpha	protein-coding
20646	chr17	7578420	7578573	+	16	NA	TTS (NR_002912)	TTS (NR_002912)	541	NR_002912	26781		NR_002912	ENSG00000277985	SNORA67	RNU67|U67	small nucleolar RNA, H/ACA box 67	snoRNA
4580	chr20	35306848	35307420	+	16	NA	intron (NM_199487, intron 7 of 8)	intron (NM_199487, intron 7 of 8)	-14709	NM_178468	128876		NM_178468	ENSG00000125998	FAM83C	C20orf128|dJ614O4.7	family with sequence similarity 83 member C	protein-coding
2406-6	chr8	26577700	26578056	+	16	NA	promoter-TSS (NM_001386)	promoter-TSS (NM_001386)	-67	NM_001386	1808		NM_001386	ENSG00000092964	DPYSL2	CRMP-2|CRMP2|DHPRP2|DRP-2|DRP2|N2A3|ULIP-2|ULIP2	dihydropyrimidinase like 2	protein-coding
3733-4	chr8	57854979	57855690	+	16	NA	Intergenic	Intergenic	109185	NR_134276	286178		NR_134276	ENSG00000254139	LINC03018	-	long intergenic non-protein coding RNA 3018	ncRNA
5355	chr5	126875005	126875699	+	16	NA	intron (NM_178450, intron 4 of 4)	intron (NM_178450, intron 4 of 4)	98216	NM_005573	4001		NM_005573	ENSG00000113368	LMNB1	ADLD|LMN|LMN2|LMNB|MCPH26	lamin B1	protein-coding
2898-3	chr16	14192581	14192992	+	16	NA	intron (NM_001365415, intron 1 of 7)	intron (NM_001365415, intron 1 of 7)	6100	NM_001365415	57496		NM_014048	ENSG00000186260	MRTFB	MKL2|MRTF-B|NPD001	myocardin related transcription factor B	protein-coding
4237	chr1	204363188	204363852	+	16	NA	Intergenic	Intergenic	-3591	NM_014935	22874		NM_014935	ENSG00000143850	PLEKHA6	PEPP-3|PEPP3	pleckstrin homology domain containing A6	protein-coding
4884	chr17	41177739	41178361	+	16	NA	exon (NM_033062, exon 1 of 1)	exon (NM_033062, exon 1 of 1)	171	NM_033062	85291		NM_033062	ENSG00000244537	KRTAP4-2	KAP4.2|KRTAP4.2	keratin associated protein 4-2	protein-coding
5509	chr3	177361544	177362142	+	16	NA	Intergenic	Intergenic	67401	NR_047465	100820709		NR_047465	ENSG00000203645	LINC00501	-	long intergenic non-protein coding RNA 501	ncRNA
9630	chr16	2500089	2500233	+	16	NA	intron (NM_001199107, intron 6 of 7)	CpG	-13565	NM_001198569	527		NM_001694	ENSG00000185883	ATP6V0C	ATP6C|ATP6L|ATPL|EPEO3|VATL|VPPC|Vma3	ATPase H+ transporting V0 subunit c	protein-coding
3798	chr13	45433356	45433753	+	16	NA	Intergenic	Intergenic	-15099	NM_001286806	253512		NM_001010875	ENSG00000174032	SLC25A30	KMCP1	solute carrier family 25 member 30	protein-coding
3055-4	chr10	34766237	34766586	+	16	NA	intron (NM_019619, intron 1 of 24)	intron (NM_019619, intron 1 of 24)	48885	NM_001184787	56288		NM_019619	ENSG00000148498	PARD3	ASIP|Baz|PAR3|PAR3alpha|PARD-3|PARD3A|PPP1R118|SE2-5L16|SE2-5LT1|SE2-5T2	par-3 family cell polarity regulator	protein-coding
3969	chr17	75749612	75750306	+	16	NA	intron (NM_001005619, intron 26 of 38)	intron (NM_001005619, intron 26 of 38)	15233	NM_001381985	2584		NM_000154	ENSG00000108479	GALK1	GALK|GK1|HEL-S-19	galactokinase 1	protein-coding
2745-5	chr5	431098	431442	+	16	NA	intron (NR_165159, intron 11 of 13)	intron (NR_165159, intron 11 of 13)	11890	NR_126522	116349		NM_138464		EXOC3-AS1	C5orf55	EXOC3 antisense RNA 1	ncRNA
2306-5	chr19	4400608	4400877	+	16	NA	promoter-TSS (NM_003025)	promoter-TSS (NM_003025)	-195	NM_003025	6455		NM_003025	ENSG00000141985	SH3GL1	CNSA1|EEN|SH3D2B|SH3P8	SH3 domain containing GRB2 like 1, endophilin A2	protein-coding
4393-2	chr6	34028464	34029481	+	16	NA	intron (NM_000841, intron 9 of 10)	intron (NM_000841, intron 9 of 10)	-28921	NR_031681	100302123		NR_031681	ENSG00000221697	MIR1275	MIRN1275|hsa-mir-1275|mir-1275	microRNA 1275	ncRNA
5190	chr7	30906873	30907749	+	16	NA	Intergenic	Intergenic	-4542	NM_198098	358		NM_000385	ENSG00000240583	AQP1	AQP-CHIP|CHIP28|CO	aquaporin 1 (Colton blood group)	protein-coding
6406	chr10	110399954	110399962	+	16	NA	Intergenic	MIRc|SINE|MIR	-95038	NM_005871	10285		NM_005871	ENSG00000119953	SMNDC1	SMNR|SPF30|TDRD16C	survival motor neuron domain containing 1	protein-coding
6652	chr5	82636629	82637347	+	16	NA	Intergenic	FordPrefect|DNA|hAT-Tip100	-203167	NR_039773	100616297		NR_039773	ENSG00000283359	MIR3977	-	microRNA 3977	ncRNA
6012	chr16	87844069	87844843	+	16	NA	intron (NM_003486, intron 2 of 9)	intron (NM_003486, intron 2 of 9)	-9440	NR_162122	113218509		NR_162122		MIR11401	-	microRNA 11401	ncRNA
5279-2	chr5	1204647	1205502	+	16	NA	intron (NM_001003841, intron 1 of 11)	intron (NM_001003841, intron 1 of 11)	3479	NM_001003841	340024		NM_001003841	ENSG00000174358	SLC6A19	B0AT1|HND	solute carrier family 6 member 19	protein-coding
3501	chr1	16207819	16208653	+	16	NA	intron (NM_153213, intron 2 of 15)	intron (NM_153213, intron 2 of 15)	4416	NM_153213	128272		NM_153213	ENSG00000142632	ARHGEF19	WGEF	Rho guanine nucleotide exchange factor 19	protein-coding
5239-2	chr16	78483083	78483162	+	16	NA	intron (NM_016373, intron 8 of 8)	intron (NM_016373, intron 8 of 8)	383468	NR_120436	51741		NM_016373	ENSG00000186153	WWOX	D16S432E|DEE28|EIEE28|FOR|FRA16D|HHCMA56|PRO0128|SCAR12|SDR41C1|WOX1	WW domain containing oxidoreductase	protein-coding
4870-2	chr16_KI270855v1_alt	95021	95618	+	16	NA	intron (NM_001351729, intron 7 of 27).2	intron (NM_001351729, intron 7 of 27).2	21148	NM_138440	114990		NM_138440	ENSG00000168140	VASN	SLITL2	vasorin	protein-coding
6324	chr10	84551341	84552118	+	16	NA	Intergenic	Intergenic	126560	NM_001284242	54462		NM_018999	ENSG00000107771	CCSER2	FAM190B|Gcap14|KIAA1128|bA486O22.1	coiled-coil serine rich protein 2	protein-coding
6475	chr1	115976528	115977715	+	16	NA	non-coding (NR_125970, exon 1 of 5)	non-coding (NR_125970, exon 1 of 5)	155	NR_125970	101928977		NR_125970		LOC101928977	-	uncharacterized LOC101928977	ncRNA
3896	chr1	17565703	17566131	+	16	NA	intron (NR_137287, intron 1 of 29)	L2c|LINE|L2	-14636	NM_001011722	55160		NM_018125	ENSG00000074964	ARHGEF10L	GrinchGEF	Rho guanine nucleotide exchange factor 10 like	protein-coding
4707	chr12	108623115	108623156	+	16	NA	exon (NM_003006, exon 2 of 2)	exon (NM_003006, exon 2 of 2)	8946	NM_001206609	6404		NM_003006	ENSG00000110876	SELPLG	CD162|CLA|PSGL-1|PSGL1	selectin P ligand	protein-coding
6163	chr20	38299153	38299351	+	16	NA	Intergenic	Intergenic	-4904	NM_001725	671		NM_001725	ENSG00000101425	BPI	BPIFD1|rBPI	bactericidal permeability increasing protein	protein-coding
4112	chr1	76868237	76868687	+	16	NA	intron (NM_030965, intron 1 of 4)	CpG	982	NM_030965	81849		NM_030965	ENSG00000117069	ST6GALNAC5	SIAT7-E|SIAT7E|ST6GalNAcV	ST6 N-acetylgalactosaminide alpha-2,6-sialyltransferase 5	protein-coding
10570	chr5	67164842	67165027	+	16	NA	exon (NM_001290226, exon 27 of 27)	exon (NM_001290226, exon 27 of 27)	31865	NM_005582	4064		NM_005582	ENSG00000134061	CD180	LY64|Ly78|RP105	CD180 molecule	protein-coding
3432-2	chr4	139856922	139857418	+	16	NA	intron (NM_018717, intron 2 of 4)	intron (NM_018717, intron 2 of 4)	191351	NM_001204368	4258		NM_002413	ENSG00000085871	MGST2	GST2|MGST-II	microsomal glutathione S-transferase 2	protein-coding
4289	chr2	73701045	73701624	+	16	NA	promoter-TSS (NR_132338)	promoter-TSS (NR_132338)	6	NR_132338	51471		NM_016347		NAT8B	CML2|Hcml2|NAT8BP	N-acetyltransferase 8B (putative, gene/pseudogene)	pseudo
3632	chr11	19912533	19913033	+	16	NA	intron (NM_145117, intron 6 of 37)	intron (NM_145117, intron 6 of 37)	-109773	NM_001111019	89797		NM_145117	ENSG00000166833	NAV2	HELAD1|POMFIL2|RAINB1|STEERIN2|UNC53H2	neuron navigator 2	protein-coding
4842	chr14	20799554	20800359	+	16	NA	Intergenic	LTR47A2|LTR|ERVL	2408	NM_198232	6035		NM_002933	ENSG00000129538	RNASE1	RAC1|RIB1|RNS1	ribonuclease A family member 1, pancreatic	protein-coding
3616	chr11	66866357	66867033	+	16	NA	intron (NM_022172, intron 8 of 20)	intron (NM_022172, intron 8 of 20)	9631	NM_024036	78999		NM_024036	ENSG00000173621	LRFN4	FIGLER6|SALM3|SALM3.	leucine rich repeat and fibronectin type III domain containing 4	protein-coding
3908	chr1	43282564	43283121	+	16	NA	exon (NM_001164829, exon 3 of 3)	exon (NM_001164829, exon 3 of 3)	2739	NM_001164829	149466		NM_182517	ENSG00000253313	C1orf210	TEMP	chromosome 1 open reading frame 210	protein-coding
3858-2	chr17	75113760	75114207	+	16	NA	intron (NM_024585, intron 2 of 2)	intron (NM_024585, intron 2 of 2)	4014	NM_001304272	79637		NM_024585	ENSG00000125449	ARMC7	-	armadillo repeat containing 7	protein-coding
3368	chr14	22996793	22997462	+	16	NA	intron (NM_021944, intron 2 of 6)	intron (NM_021944, intron 2 of 6)	3910	NM_001282969	60686		NM_021944	ENSG00000100802	C14orf93	RTFC	chromosome 14 open reading frame 93	protein-coding
3527	chr8	141276752	141277217	+	15	NA	intron (NM_001286646, intron 1 of 8)	intron (NM_001286646, intron 1 of 8)	22417	NR_161376	105375787		NR_161376	ENSG00000254019	SLC45A4-AS1	-	SLC45A4 antisense RNA 1	ncRNA
4577	chr11	64910293	64911004	+	15	NA	exon (NM_001367972, exon 12 of 41)	exon (NM_001367972, exon 12 of 41)	6561	NM_001367972	23130		NM_015104	ENSG00000110046	ATG2A	BLTP4A	autophagy related 2A	protein-coding
5764	chr11	61508163	61508652	+	15	NA	promoter-TSS (NR_039708)	promoter-TSS (NR_039708)	-189	NR_039708	100616470		NR_039708	ENSG00000266006	MIR4488	mir-4488	microRNA 4488	ncRNA
1694-7	chr2	101151484	101151749	+	15	NA	promoter-TSS (NR_138475)	promoter-TSS (NR_138475)	-44	NR_135594	100506286		NR_135594	ENSG00000272902	TBC1D8-AS1	-	TBC1D8 antisense RNA 1	ncRNA
3368-3	chr2	235849650	235850121	+	15	NA	intron (NM_001037131, intron 9 of 17)	intron (NM_001037131, intron 9 of 17)	318501	NM_001485	2637		NM_001485	ENSG00000168505	GBX2	-	gastrulation brain homeobox 2	protein-coding
3608	chr11	22508646	22509216	+	15	NA	Intergenic	Intergenic	-16912	NR_120583	102723378		NR_120583	ENSG00000255323	LINC01495	-	long intergenic non-protein coding RNA 1495	ncRNA
2788	chr1	25726331	25726583	+	15	NA	intron (NM_001385185, intron 1 of 10)	intron (NM_001385185, intron 1 of 10)	30302	NM_001385185	57134		NM_020379	ENSG00000117643	MAN1C1	HMIC|MAN1A3|MAN1C|pp6318	mannosidase alpha class 1C member 1	protein-coding
9992	chr10	119313740	119314321	+	15	NA	intron (NM_005308, intron 1 of 15)	intron (NM_005308, intron 1 of 15)	-63942	NR_039829	100616398		NR_039829	ENSG00000265719	MIR4681	-	microRNA 4681	ncRNA
12049	chr15	64701714	64701722	+	15	NA	intron (NM_002537, intron 1 of 4)	intron (NM_002537, intron 1 of 4)	1563	NM_002537	4947		NM_002537	ENSG00000180304	OAZ2	AZ2	ornithine decarboxylase antizyme 2	protein-coding
4423	chr11	15074701	15075385	+	15	NA	intron (NM_000728, intron 2 of 4)	intron (NM_000728, intron 2 of 4)	1450	NM_000728	797		NM_000728	ENSG00000175868	CALCB	CALC2|CGRP-II|CGRP2	calcitonin related polypeptide beta	protein-coding
2227-3	chr17	28384238	28384807	+	15	NA	exon (NM_015077, exon 3 of 9)	exon (NM_015077, exon 3 of 9)	12828	NM_015077	23098		NM_015077	ENSG00000004139	SARM1	HsTIR|MyD88-5|SAMD2|SARM|hSARM1	sterile alpha and TIR motif containing 1	protein-coding
3630	chr17	40098930	40099441	+	15	NA	intron (NM_021724, intron 1 of 7)	CpG	1404	NM_021724	9572		NM_021724	ENSG00000126368	NR1D1	EAR1|REVERBA|REVERBalpha|THRA1|THRAL|ear-1|hRev	nuclear receptor subfamily 1 group D member 1	protein-coding
6039	chr2	110022492	110023117	+	15	NA	Intergenic	Intergenic	35824	NR_046110	440894		NR_046110	ENSG00000204588	LINC01123	-	long intergenic non-protein coding RNA 1123	ncRNA
2504-4	chr19	2101774	2102200	+	15	NA	3' UTR (NM_003938, exon 30 of 30)	3' UTR (NM_003938, exon 30 of 30)	5072	NM_001039846	113177		NM_052878	ENSG00000099840	IZUMO4	C19orf36|IMAGE:4215339	IZUMO family member 4	protein-coding
3225-2	chr3	176592501	176592889	+	15	NA	Intergenic	Intergenic	42837	NR_109968	100505547		NR_109968		LINC01208	-	long intergenic non-protein coding RNA 1208	ncRNA
5357	chr19	2199164	2199980	+	15	NA	intron (NM_032482, intron 7 of 27)	intron (NM_032482, intron 7 of 27)	34577	NR_031596	100302283		NR_031596	ENSG00000221411	MIR1227	MIRN1227|hsa-mir-1227|mir-1227	microRNA 1227	ncRNA
5287	chr2	183070961	183071730	+	15	NA	Intergenic	Intergenic	-7402	NM_001321519	142679		NM_080876	ENSG00000162999	DUSP19	DUSP17|LMWDSP3|SKRP1|TS-DSP1	dual specificity phosphatase 19	protein-coding
3182	chr11	66280395	66280703	+	15	NA	intron (NM_182553, intron 1 of 5)	intron (NM_182553, intron 1 of 5)	2374	NR_073079	254263		NM_182553	ENSG00000174871	CNIH2	CNIH-2|Cnil	cornichon family AMPA receptor auxiliary protein 2	protein-coding
3009-2	chr11	33067414	33067762	+	15	NA	intron (NM_001145541, intron 8 of 9)	intron (NM_001145541, intron 8 of 9)	-8562	NR_015451	283267		NR_015451	ENSG00000280798	LINC00294	NCRNA00294	long intergenic non-protein coding RNA 294	ncRNA
5419	chr8	141238438	141238559	+	15	NA	intron (NM_001286646, intron 2 of 8)	L1MB3|LINE|L1	-9924	NM_001286648	57210		NM_001080431	ENSG00000022567	SLC45A4	-	solute carrier family 45 member 4	protein-coding
3926	chr2	181683909	181684462	+	15	NA	Intergenic	CpG	-3520	NR_146175	4760		NM_002500	ENSG00000162992	NEUROD1	BETA2|BHF-1|MODY6|NEUROD|T2D|bHLHa3	neuronal differentiation 1	protein-coding
3311-2	chr2	109128104	109128425	+	15	NA	promoter-TSS (NM_001099289)	promoter-TSS (NM_001099289)	-941	NM_001099289	344558		NM_001099289	ENSG00000172985	SH3RF3	POSH2|SH3MD4	SH3 domain containing ring finger 3	protein-coding
4479-2	chr16	49503941	49505039	+	15	NA	intron (NM_001379286, intron 7 of 7)	AluSz6|SINE|Alu	14095	NR_144553	1596		NR_144553	ENSG00000260089	ADAM3B	CYRN2	ADAM metallopeptidase domain 3B (pseudogene)	pseudo
3428-2	chr8	53734716	53735145	+	15	NA	intron (NM_213620, intron 13 of 13)	HERVE_a-int|LTR|ERV1	108112	NM_213620	51606		NM_015941	ENSG00000047249	ATP6V1H	CGI-11|MSTP042|NBP1|SFD|SFDalpha|SFDbeta|VMA13	ATPase H+ transporting V1 subunit H	protein-coding
2763-2	chr17	40242635	40243064	+	15	NA	intron (NM_133264, intron 1 of 7)	intron (NM_133264, intron 1 of 7)	23545	NM_133264	147179		NM_133264	ENSG00000171475	WIPF2	WICH|WIRE	WAS/WASL interacting protein family member 2	protein-coding
4630-2	chr6	132400770	132401516	+	15	NA	intron (NM_015529, intron 1 of 11)	CpG	332	NM_015529	26002		NM_015529	ENSG00000079931	MOXD1	MOX|PRO5780|dJ248E1.1	monooxygenase DBH like 1	protein-coding
3537	chr3	125766022	125766732	+	15	NA	Intergenic	CpG	-8337	NR_153417	105374312		NR_153417	ENSG00000272840	LOC105374312	-	uncharacterized LOC105374312	ncRNA
5215	chr2	32946425	32947290	+	15	NA	promoter-TSS (NM_206943)	promoter-TSS (NM_206943)	-96	NM_206943	4052		NM_000627	ENSG00000049323	LTBP1	ARCL2E	latent transforming growth factor beta binding protein 1	protein-coding
5240	chr20	64037435	64037757	+	15	NA	intron (NM_001348090, intron 4 of 6)	intron (NM_001348090, intron 4 of 6)	3869	NM_001348090	284739		NM_207349	ENSG00000196421	C20orf204	LINC00176|NCRNA00176|PRR17	chromosome 20 open reading frame 204	protein-coding
3965	chr1	203636232	203636875	+	15	NA	intron (NM_001365784, intron 1 of 20)	intron (NM_001365784, intron 1 of 20)	8616	NM_001365784	493		NM_001684	ENSG00000058668	ATP2B4	ATP2B2|MXRA1|PMCA4|PMCA4b|PMCA4x	ATPase plasma membrane Ca2+ transporting 4	protein-coding
4499	chr15	67863528	67864028	+	15	NA	Intergenic	CpG	-23733	NR_004394	26827		NR_004394	ENSG00000206625	RNU6-1	RNU6|RNU6A|U6|U6-1	RNA, U6 small nuclear 1	snRNA
4081	chr14	95550117	95550710	+	15	NA	Intergenic	Intergenic	15363	NM_016417	51218		NM_016417	ENSG00000182512	GLRX5	C14orf87|FLB4739|GRX5|PR01238|PRO1238|PRSA|SIDBA3|SPAHGC	glutaredoxin 5	protein-coding
3996	chr11	64263700	64264215	+	15	NA	intron (NM_001316314, intron 21 of 31)	intron (NM_001316314, intron 21 of 31)	-6574	NM_001378078	56834		NM_020155	ENSG00000173264	GPR137	C11orf4|GPR137A|TM7SF1L1	G protein-coupled receptor 137	protein-coding
4856	chr11	86519580	86520636	+	15	NA	intron (NR_147828, intron 4 of 14)	intron (NR_147828, intron 4 of 14)	145221	NM_001156474	60494		NM_021827	ENSG00000149201	CCDC81	-	coiled-coil domain containing 81	protein-coding
3475-2	chr9	34701354	34701757	+	15	NA	Intergenic	CpG	8581	NM_002989	6366		NM_002989	ENSG00000137077	CCL21	6Ckine|CKb9|ECL|SCYA21|SLC|TCA4	C-C motif chemokine ligand 21	protein-coding
5358	chr2	47273264	47273964	+	15	NA	intron (NR_110207, intron 1 of 2)	L2a|LINE|L2	-61701	NR_001568	618		NR_001568	ENSG00000236824	BCYRN1	BC200|BC200a|LINC00004|NCRNA00004	brain cytoplasmic RNA 1	ncRNA
4868	chr7	27448939	27449498	+	15	NA	Intergenic	L1P2|LINE|L1	-166756	NR_122123	790953		NR_122122		TSL	-	testis-expressed, seven-twelve, leukemia	ncRNA
3911-3	chr4	81314392	81315146	+	15	NA	Intergenic	MamRTE1|LINE|RTE-BovB	-99547	NM_001282485	5593		NM_006259	ENSG00000138669	PRKG2	AMD4|PKG2|PRKGR2|SMDP|cGK2|cGKII	protein kinase cGMP-dependent 2	protein-coding
4145-2	chr2	223957039	223957857	+	15	NA	promoter-TSS (NM_022915)	promoter-TSS (NM_022915)	-15	NM_022915	65080		NM_022915	ENSG00000135900	MRPL44	COXPD16|L44MT|MRP-L44|mL44	mitochondrial ribosomal protein L44	protein-coding
4229-2	chr16	68707924	68708109	+	15	NA	Intergenic	Intergenic	-29276	NM_001317185	999		NM_004360	ENSG00000039068	CDH1	Arc-1|BCDS1|CD324|CDHE|ECAD|LCAM|UVO	cadherin 1	protein-coding
3952	chr1	6449021	6449561	+	15	NA	intron (NM_031475, intron 8 of 12)	intron (NM_031475, intron 8 of 12)	16882	NM_003790	8718		NM_003790	ENSG00000215788	TNFRSF25	APO-3|DDR3|DR3|GEF720|LARD|PLEKHG5|TNFRSF12|TR3|TRAMP|WSL-1|WSL-LR	TNF receptor superfamily member 25	protein-coding
3745-2	chr19	15285839	15286332	+	15	NA	intron (NM_001379291, intron 1 of 19)	intron (NM_001379291, intron 1 of 19)	-5634	NM_014299	23476		NM_014299	ENSG00000141867	BRD4	CAP|CDLS6|FSHRG4|HUNK1|HUNKI|MCAP	bromodomain containing 4	protein-coding
2686-7	chr8	79869502	79869767	+	15	NA	intron (NR_110954, intron 2 of 5)	intron (NR_110954, intron 2 of 5)	2103	NR_110954	101927040		NR_110954	ENSG00000249328	LOC101927040	-	uncharacterized LOC101927040	ncRNA
4354	chr19	13121993	13123120	+	15	NA	intron (NM_052876, intron 1 of 5)	MER20|DNA|hAT-Charlie	4292	NM_052876	112939		NM_052876	ENSG00000160877	NACC1	BEND8|BTBD14B|BTBD30|NAC-1|NAC1|NECFM	nucleus accumbens associated 1	protein-coding
4419	chr19	50500044	50500762	+	15	NA	Intergenic	Intergenic	10788	NM_138334	126119		NM_138334	ENSG00000161677	JOSD2	SBBI54	Josephin domain containing 2	protein-coding
3627	chr11	65586601	65586814	+	15	NA	intron (NM_001099409, intron 12 of 18)	intron (NM_001099409, intron 12 of 18)	9093	NM_033347	10089		NM_005714	ENSG00000173338	KCNK7	K2p7.1|TWIK3	potassium two pore domain channel subfamily K member 7	protein-coding
5538-2	chr4	3243997	3244044	+	15	NA	promoter-TSS (NM_001330620)	promoter-TSS (NM_001330620)	-349	NM_001330620	345222		NM_001012982	ENSG00000188981	MSANTD1	C4orf44	Myb/SANT DNA binding domain containing 1	protein-coding
5094	chr1	161523984	161524784	+	15	NA	promoter-TSS (NM_002155)	promoter-TSS (NM_002155)	-156	NM_002155	3310		NM_002155	ENSG00000173110	HSPA6	HSP70B'	heat shock protein family A (Hsp70) member 6	protein-coding
5130	chr12	131219939	131220573	+	15	NA	Intergenic	Intergenic	55245	NR_026670	116437		NR_026670	ENSG00000204603	LINC01257	-	long intergenic non-protein coding RNA 1257	ncRNA
2076-5	chr22	21646769	21647185	+	15	NA	Intergenic	Intergenic	4675	NM_022044	23753		NM_022044	ENSG00000128228	SDF2L1	-	stromal cell derived factor 2 like 1	protein-coding
3663	chr11	2175608	2176081	+	15	NA	Intergenic	Intergenic	2781	NR_039834	100616126		NR_039834	ENSG00000265258	MIR4686	-	microRNA 4686	ncRNA
3073-3	chr16	29369127	29369469	+	15	NA	Intergenic	MLT1K|LTR|ERVL-MaLR	35247	NM_001310137	728888		NM_001310137	ENSG00000254206	NPIPB11	NPIP	nuclear pore complex interacting protein family member B11	protein-coding
5458	chr1	41515845	41516680	+	15	NA	intron (NM_001127714, intron 6 of 7)	CpG	-31579	NM_001956	1907		NM_001956	ENSG00000127129	EDN2	ET-2|ET2|PPET2	endothelin 2	protein-coding
7850	chr10	79026900	79026935	+	15	NA	intron (NR_015429, intron 3 of 7)	MIR1_Amn|SINE|MIR	40531	NR_024429	283050		NR_015429	ENSG00000224596	ZMIZ1-AS1	-	ZMIZ1 antisense RNA 1	ncRNA
5340	chr8	102790690	102791579	+	15	NA	Intergenic	Intergenic	-15688	NR_149020	401472		NR_149020		GASAL1	GASL1	growth arrest associated lncRNA 1	ncRNA
4671	chr3	120719236	120719976	+	15	NA	intron (NM_173825, intron 2 of 7)	L1PA4|LINE|L1	22910	NM_173825	285282		NM_173825	ENSG00000144840	RABL3	PNCA5	RAB, member of RAS oncogene family like 3	protein-coding
5128	chr17	338776	339717	+	15	NA	intron (NM_006987, intron 1 of 9).2	intron (NM_006987, intron 1 of 9).2	7727	NR_040011	100506388		NR_040011	ENSG00000262061	RPH3AL-AS1	-	RPH3AL antisense RNA 1	ncRNA
4634	chr11	29261053	29261635	+	15	NA	Intergenic	L1PA16|LINE|L1	-333069	NR_149107	105376606		NR_149106	ENSG00000255117	LINC02546	-	long intergenic non-protein coding RNA 2546	ncRNA
4027	chr7	64903140	64903659	+	15	NA	non-coding (NR_003099, exon 1 of 5)	non-coding (NR_003099, exon 1 of 5)	126	NR_169748	10793		NM_021148	ENSG00000198039	ZNF273	HZF9	zinc finger protein 273	protein-coding
3344-3	chr7	114533028	114533443	+	15	NA	intron (NM_148900, intron 2 of 17)	intron (NM_148900, intron 2 of 17)	106733	NM_001172767	93986		NM_014491	ENSG00000128573	FOXP2	CAGH44|SPCH1|TNRC10	forkhead box P2	protein-coding
2574-2	chr9	109440606	109441018	+	15	NA	intron (NM_001145369, intron 2 of 20)	L3|LINE|CR1	10572	NM_001145369	5774		NM_002829	ENSG00000070159	PTPN3	PTP-H1|PTPH1	protein tyrosine phosphatase non-receptor type 3	protein-coding
3983-2	chr3	192696101	192696639	+	15	NA	intron (NM_001377293, intron 1 of 4)	intron (NM_001377293, intron 1 of 4)	31171	NM_004113	2257		NM_004113	ENSG00000114279	FGF12	DEE47|EIEE47|FGF12B|FHF1	fibroblast growth factor 12	protein-coding
2951	chr1	226121623	226121932	+	15	NA	Intergenic	CpG	-26226	NR_146443	107985353		NR_146443	ENSG00000234478	ACBD3-AS1	-	ACBD3 antisense RNA 1	ncRNA
4040	chrX	22013086	22013461	+	15	NA	Intergenic	Intergenic	-19052	NM_001282754	5251		NM_000444	ENSG00000102174	PHEX	HPDR|HPDR1|HYP|HYP1|LXHR|PEX|XLH	phosphate regulating endopeptidase X-linked	protein-coding
3868	chr17	74011802	74012322	+	15	NA	Intergenic	Intergenic	-183525	NR_027146	283982		NM_182564		LINC00469	C17orf54	long intergenic non-protein coding RNA 469	ncRNA
5538	chr4	3243019	3243807	+	15	NA	promoter-TSS (NM_001330620)	promoter-TSS (NM_001330620)	-956	NM_001330620	345222		NM_001012982	ENSG00000188981	MSANTD1	C4orf44	Myb/SANT DNA binding domain containing 1	protein-coding
10772	chr4	139984696	139986299	+	15	NA	intron (NM_018717, intron 1 of 4)	intron (NM_018717, intron 1 of 4)	-142518	NR_147610	101927516		NR_147610		LOC101927516	-	uncharacterized LOC101927516	ncRNA
2547-5	chr7	65037774	65038039	+	15	NA	promoter-TSS (NR_033416)	promoter-TSS (NR_033416)	-448	NR_033416	643180		NR_033416	ENSG00000290860	CCT6P3	CCT6-3P	chaperonin containing TCP1 subunit 6 pseudogene 3	pseudo
4428	chr4	124936294	124936866	+	15	NA	Intergenic	Intergenic	-223848	NM_001167882	57182		NM_020337	ENSG00000151458	ANKRD50	-	ankyrin repeat domain containing 50	protein-coding
3999	chr1	3771321	3771776	+	15	NA	TTS (NM_152492)	TTS (NM_152492)	-1201	NM_001288583	388588		NM_001163724	ENSG00000235169	SMIM1	Vel	small integral membrane protein 1 (Vel blood group)	protein-coding
3741	chr7	102119073	102119618	+	15	NA	intron (NM_181552, intron 8 of 23)	intron (NM_181552, intron 8 of 23)	-165796	NM_020979	10603		NM_020979	ENSG00000160999	SH2B2	APS	SH2B adaptor protein 2	protein-coding
4991	chr1	45688742	45689046	+	15	NA	intron (NM_016486, intron 1 of 2)	intron (NM_016486, intron 1 of 2)	713	NM_016486	51249		NM_016486	ENSG00000159596	TMEM69	C1orf154	transmembrane protein 69	protein-coding
4716	chr18	63099637	63100184	+	15	NA	Intergenic	Intergenic	219859	NM_000633	596		NM_000633	ENSG00000171791	BCL2	Bcl-2|PPP1R50	BCL2 apoptosis regulator	protein-coding
3767	chr2	149819335	149819832	+	15	NA	intron (NR_145421, intron 2 of 4)	LTR33A_|LTR|ERVL	39608	NR_145421	150596		NM_153041	ENSG00000162947	LINC01931	-	long intergenic non-protein coding RNA 1931	ncRNA
3781	chr1	34685055	34685697	+	15	NA	Intergenic	MLT1G|LTR|ERVL-MaLR	-15682	NR_030278	693137		NR_030278	ENSG00000207941	MIR552	MIRN552|hsa-mir-552	microRNA 552	ncRNA
3118	chr1	69312221	69312599	+	15	NA	Intergenic	L1PA8A|LINE|L1	-120845	NR_147164	105378788		NR_147164	ENSG00000229639	LINC01758	-	long intergenic non-protein coding RNA 1758	ncRNA
3046-3	chr8	1897262	1897929	+	15	NA	intron (NM_001308153, intron 15 of 29)	intron (NM_001308153, intron 15 of 29)	73669	NM_001308153	9639		NM_014629	ENSG00000104728	ARHGEF10	GEF10|SNCV	Rho guanine nucleotide exchange factor 10	protein-coding
5460	chr9	137046008	137046807	+	15	NA	promoter-TSS (NM_015392)	promoter-TSS (NM_015392)	-230	NM_015392	56654		NM_015392	ENSG00000107281	NPDC1	CAB|CAB-|CAB-1|CAB1|NPDC-1	neural proliferation, differentiation and control 1	protein-coding
3722	chr1	45802675	45803430	+	15	NA	promoter-TSS (NM_015112)	promoter-TSS (NM_015112)	-555	NM_001324320	23139		NM_015112	ENSG00000086015	MAST2	MAST205|MTSSK	microtubule associated serine/threonine kinase 2	protein-coding
3981	chrY	19062047	19062496	+	15	NA	intron (NR_158641, intron 2 of 4)	intron (NR_158641, intron 2 of 4)	13732	NR_125736	83869		NM_031932	ENSG00000176728	TTTY14	CYorf14|NCRNA00137|NCRNA00185|PRO2834|TTY14	testis expressed transcript, Y-linked 14	ncRNA
6444	chr11	46351440	46351482	+	15	NA	intron (NM_001199266, intron 1 of 30)	intron (NM_001199266, intron 1 of 30)	3998	NM_001199268	8525		NM_003646	ENSG00000149091	DGKZ	DAGK5|DAGK6|DGK-ZETA|hDGKzeta	diacylglycerol kinase zeta	protein-coding
4225	chr22	24428616	24429248	+	15	NA	TTS (NR_028484)	TTS (NR_028484)	1333	NR_103543	135		NM_000675	ENSG00000128271	ADORA2A	A2aR|ADORA2|RDC8	adenosine A2a receptor	protein-coding
3626-3	chr7	157010264	157010669	+	15	NA	promoter-TSS (NR_038835)	promoter-TSS (NR_038835)	197	NM_005515	3110		NM_005515	ENSG00000130675	MNX1	HB9|HLXB9|HOXHB9|SCRA1	motor neuron and pancreas homeobox 1	protein-coding
2644-6	chr7	2314456	2314911	+	15	NA	promoter-TSS (NM_013321)	promoter-TSS (NM_013321)	-242	NM_013321	29886		NM_013321	ENSG00000106266	SNX8	Mvp1	sorting nexin 8	protein-coding
4440-2	chr17	68378057	68378684	+	15	NA	intron (NM_001352901, intron 8 of 11)	intron (NM_001352901, intron 8 of 11)	-35253	NM_001278433	5573		NM_002734	ENSG00000108946	PRKAR1A	ACRDYS1|ADOHR|CAR|CNC|CNC1|PKR1|PPNAD1|PRKAR1|Prkar1alpha|TSE1	protein kinase cAMP-dependent type I regulatory subunit alpha	protein-coding
2517-3	chr19	46296866	46297264	+	15	NA	promoter-TSS (NM_152795)	promoter-TSS (NM_152795)	23	NM_152795	64344		NM_022462	ENSG00000124440	HIF3A	HIF-3A|HIF3-alpha-1|IPAS|MOP7|PASD7|bHLHe17	hypoxia inducible factor 3 subunit alpha	protein-coding
3710	chr18	48675136	48675710	+	14	NA	intron (NM_014772, intron 6 of 11)	intron (NM_014772, intron 6 of 11)	4823	NR_039897	100616366		NR_039897	ENSG00000266276	MIR4743	-	microRNA 4743	ncRNA
3481-4	chr8	66712866	66713519	+	14	NA	intron (NM_001033578, intron 1 of 16)	intron (NM_001033578, intron 1 of 16)	411	NM_001033578	23678		NM_013257	ENSG00000104205	SGK3	CISK|SGK2|SGKL	serum/glucocorticoid regulated kinase family member 3	protein-coding
5293	chr3	45513124	45513748	+	14	NA	intron (NM_001368263, intron 15 of 20)	intron (NM_001368263, intron 15 of 20)	-3891	NR_048543	100885795		NR_048543		LARS2-AS1	-	LARS2 antisense RNA 1	ncRNA
3296	chr7	3214426	3214980	+	14	NA	Intergenic	MER57A1|LTR|ERV1	-56130	NR_126024	100129603		NR_126024		LOC100129603	-	uncharacterized LOC100129603	ncRNA
3879-2	chr6	87929938	87930426	+	14	NA	Intergenic	Intergenic	-117659	NM_030960	81833		NM_030960	ENSG00000118434	SPACA1	SAMP32|SPGF85	sperm acrosome associated 1	protein-coding
2805-2	chr2	61144746	61145187	+	14	NA	promoter-TSS (NM_001367071)	promoter-TSS (NM_001367071)	9	NR_036496	339803		NR_036496	ENSG00000212978	C2orf74-DT	-	C2orf74 divergent transcript	ncRNA
4008-2	chr20	62087794	62088517	+	14	NA	Intergenic	Intergenic	-22345	NM_003185	6874		NM_003185	ENSG00000130699	TAF4	MRD73|TAF(II)130|TAF(II)135|TAF2C|TAF2C1|TAF4A|TAFII-130|TAFII-135|TAFII130|TAFII135	TATA-box binding protein associated factor 4	protein-coding
2966	chr1	25824801	25824980	+	14	NA	intron (NM_019557, intron 3 of 6)	intron (NM_019557, intron 3 of 6)	-1284	NR_024498	646471		NR_024498		LOC646471	-	uncharacterized LOC646471	ncRNA
3313-2	chr11	59761912	59762338	+	14	NA	intron (NM_004177, intron 1 of 10)	L1MD3|LINE|L1	6749	NM_004177	6809		NM_004177	ENSG00000166900	STX3	DIAR12|MVID2|RDMVID|STX3A	syntaxin 3	protein-coding
4313	chr10	110407662	110408653	+	14	NA	Intergenic	Intergenic	-89750	NM_004419	1847		NM_004419	ENSG00000138166	DUSP5	DUSP|HVH3	dual specificity phosphatase 5	protein-coding
4526	chr12	76869184	76870031	+	14	NA	intron (NM_001300965, intron 1 of 5)	intron (NM_001300965, intron 1 of 5)	9412	NM_001321	1466		NM_001321	ENSG00000175183	CSRP2	CRP2|LMO5|SmLIM	cysteine and glycine rich protein 2	protein-coding
6819	chr13	99435507	99435747	+	14	NA	Intergenic	Intergenic	63679	NR_110731	102725509		NR_110731		LINC01232	TCONS_00021520	long intergenic non-protein coding RNA 1232	ncRNA
2872	chr6	21100953	21101299	+	14	NA	intron (NM_017774, intron 12 of 15)	intron (NM_017774, intron 12 of 15)	410766	NR_103790	100874531		NR_103790	ENSG00000280989	LINC00581	linc-MBOAT1-4	long intergenic non-protein coding RNA 581	ncRNA
2354-2	chr17	64918766	64919013	+	14	NA	intron (NM_199340, intron 1 of 14)	AluSx1|SINE|Alu	602	NM_199340	374819		NM_199340	ENSG00000176809	LRRC37A3	LRRC37|LRRC37A	leucine rich repeat containing 37 member A3	protein-coding
3190	chr9	89604805	89605378	+	14	NA	promoter-TSS (NM_006705)	promoter-TSS (NM_006705)	79	NM_006705	10912		NM_006705	ENSG00000130222	GADD45G	CR6|DDIT2|GADD45gamma|GRP17	growth arrest and DNA damage inducible gamma	protein-coding
5055-2	chr7	123846379	123846812	+	14	NA	intron (NM_012269, intron 1 of 4)	L1PBa1|LINE|L1	1426	NM_012269	23553		NM_012269	ENSG00000106302	HYAL4	CSHY|HYAL-4	hyaluronidase 4	protein-coding
2744	chr1	16078920	16079352	+	14	NA	Intergenic	Intergenic	-5485	NM_182623	348487		NM_182623	ENSG00000185519	FAM131C	C1orf117	family with sequence similarity 131 member C	protein-coding
4462	chr17	81407607	81408340	+	14	NA	intron (NM_001377448, intron 2 of 27)	(GCTCCTG)n|Simple_repeat|Simple_repeat	-7195	NR_039894	100616294		NR_039894	ENSG00000266392	MIR4740	-	microRNA 4740	ncRNA
7370	chr12	59596017	59596968	+	14	NA	intron (NM_001270622, intron 1 of 5)	CpG	463	NM_001270622	9194		NM_004731	ENSG00000118596	SLC16A7	MCT2	solute carrier family 16 member 7	protein-coding
2918-2	chr20	62972498	62972977	+	14	NA	Intergenic	CpG	20028	NM_001302643	63910		NM_022082	ENSG00000101194	SLC17A9	C20orf59|POROK8|VNUT	solute carrier family 17 member 9	protein-coding
4831-2	chr3	37890821	37891542	+	14	NA	intron (NM_005808, intron 1 of 6)	intron (NM_005808, intron 1 of 6)	29301	NM_005808	10217		NM_005808	ENSG00000144677	CTDSPL	C3orf8|HYA22|PSR1|RBSP3|SCP3	CTD small phosphatase like	protein-coding
6277	chr22	43396674	43397544	+	14	NA	Intergenic	Intergenic	-3222	NR_146918	105373054		NR_146918	ENSG00000236117	LINC01639	-	long intergenic non-protein coding RNA 1639	ncRNA
3474	chr11	111976682	111977136	+	14	NA	promoter-TSS (NM_033425)	promoter-TSS (NM_033425)	-400	NM_033425	85458		NM_033425	ENSG00000150764	DIXDC1	CCD1	DIX domain containing 1	protein-coding
3109-2	chr11	106157041	106157370	+	14	NA	Intergenic	Intergenic	-25089	NR_135099	105369473		NR_135099	ENSG00000254580	LINC02719	-	long intergenic non-protein coding RNA 2719	ncRNA
2995	chr10	6919421	6919763	+	14	NA	Intergenic	AluSz6|SINE|Alu	139994	NR_038291	100507127		NR_038291	ENSG00000238266	LINC00707	-	long intergenic non-protein coding RNA 707	ncRNA
7453	chr19	45484367	45484367	+	14	NA	TTS (NM_206900)	TTS (NM_206900)	8886	NM_206901	6253		NM_005619	ENSG00000125744	RTN2	NSP2|NSPL1|NSPLI|SPG12	reticulon 2	protein-coding
2641-4	chr9	137111091	137111430	+	14	NA	intron (NM_013379, intron 11 of 12)	intron (NM_013379, intron 11 of 12)	3473	NM_013379	29952		NM_013379	ENSG00000176978	DPP7	DPP2|DPPII|QPP	dipeptidyl peptidase 7	protein-coding
3470-2	chr15	63053058	63053524	+	14	NA	intron (NM_001301289, intron 1 of 7)	intron (NM_001301289, intron 1 of 7)	-3904	NR_147233	111064646		NR_147233		TPM1-AS	TPM1-AS1	TPM1 antisense RNA	ncRNA
2557-2	chr10	96844298	96844938	+	14	NA	intron (NM_032440, intron 2 of 7)	(TTTATTT)n|Simple_repeat|Simple_repeat	11673	NM_032440	84458		NM_015652	ENSG00000196233	LCOR	C10orf12|MLR2	ligand dependent nuclear receptor corepressor	protein-coding
2949	chr7	106659885	106660282	+	14	NA	3' UTR (NM_175884, exon 1 of 1)	3' UTR (NM_175884, exon 1 of 1)	1075	NM_175884	168455		NM_175884	ENSG00000253276	CCDC71L	C7orf74	coiled-coil domain containing 71 like	protein-coding
3416	chr4	24651281	24651826	+	14	NA	Intergenic	Intergenic	-66999	NM_001358	1665		NM_001358	ENSG00000109606	DHX15	DBP1|DDX15|PRP43|PRPF43|PrPp43p|hPrp43	DEAH-box helicase 15	protein-coding
2984-2	chr11	99424416	99424882	+	14	NA	intron (NM_001243271, intron 2 of 20)	MER52A|LTR|ERV1	-131496	NM_175566	53942		NM_014361	ENSG00000149972	CNTN5	HNB-2s|NB-2	contactin 5	protein-coding
2869-3	chr9	117216120	117216414	+	14	NA	intron (NM_014010, intron 2 of 21)	intron (NM_014010, intron 2 of 21)	-35066	NR_003708	100124538		NR_003708	ENSG00000207268	SNORA70C	U70C	small nucleolar RNA, H/ACA box 70C	snoRNA
2652-6	chr5	178859858	178860178	+	14	NA	promoter-TSS (NM_058230)	promoter-TSS (NM_058230)	65	NM_058230	117608		NM_058230	ENSG00000178338	ZNF354B	KID2	zinc finger protein 354B	protein-coding
2769-3	chr2	1829280	1829680	+	14	NA	intron (NM_001329845, intron 21 of 24)	intron (NM_001329845, intron 21 of 24)	-84965	NM_012293	7837		NM_012293	ENSG00000130508	PXDN	ASGD7|COPOA|D2S448|D2S448E|MG50|PRG2|PXN|VPO|hsPxd01	peroxidasin	protein-coding
4356-2	chr12	132466379	132467022	+	14	NA	Intergenic	Intergenic	-23451	NM_001382743	57666		NM_001142641	ENSG00000112787	FBRSL1	-	fibrosin like 1	protein-coding
4717	chr3	51977100	51977194	+	14	NA	intron (NM_001316331, intron 1 of 16)	intron (NM_001316331, intron 1 of 16)	2083	NM_001316331	100526760		NM_001316331	ENSG00000114786	ABHD14A-ACY1	-	ABHD14A-ACY1 readthrough	protein-coding
4452	chr14	105162471	105162804	+	14	NA	intron (NM_002226, intron 2 of 25)	intron (NM_002226, intron 2 of 25)	6139	NM_145159	3714		NM_002226	ENSG00000184916	JAG2	HJ2|LGMDR27|SER2	jagged canonical Notch ligand 2	protein-coding
4944-2	chr11	86951877	86952332	+	14	NA	exon (NM_012193, exon 2 of 2)	exon (NM_012193, exon 2 of 2)	3291	NM_012193	8322		NM_012193	ENSG00000174804	FZD4	CD344|EVR1|FEVR|FZD4S|Fz-4|Fz4|FzE4|GPCR|hFz4	frizzled class receptor 4	protein-coding
4604	chr22	20313362	20314054	+	14	NA	TTS (NM_033257)	TTS (NM_033257)	6352	NM_033257	85359		NM_033257	ENSG00000128185	DGCR6L	DGCR6	DiGeorge syndrome critical region gene 6 like	protein-coding
2136-7	chr4	162115600	162115640	+	14	NA	intron (NM_020116, intron 1 of 15)	UCON24|Unknown|Unknown	48380	NM_020116	56884		NM_020116	ENSG00000168843	FSTL5	-	follistatin like 5	protein-coding
3892	chr3	53489988	53490687	+	14	NA	Intergenic	Intergenic	-4274	NM_001128840	776		NM_000720	ENSG00000157388	CACNA1D	CACH3|CACN4|CACNL1A2|CCHL1A2|Cav1.3|PASNA|SANDD	calcium voltage-gated channel subunit alpha1 D	protein-coding
3059-2	chr3	72848142	72848576	+	14	NA	promoter-TSS (NM_018130)	promoter-TSS (NM_018130)	86	NM_018130	55164		NM_018130	ENSG00000144736	SHQ1	DYT35|GRIM-1|NEDDS|Shq1p	SHQ1, H/ACA ribonucleoprotein assembly factor	protein-coding
2322-5	chr6	27149185	27149394	+	14	NA	Intergenic	LTR16A|LTR|ERVL	1663	NR_036096	100422934		NR_036096	ENSG00000265565	MIR3143	mir-3143	microRNA 3143	ncRNA
3592	chr2	204010266	204011017	+	14	NA	Intergenic	Intergenic	73878	NM_012092	29851		NM_012092	ENSG00000163600	ICOS	AILIM|CD278|CVID1	inducible T cell costimulator	protein-coding
3830-3	chr22	22369163	22369839	+	14	NA	Intergenic	Intergenic	71403	NR_027293	96610		NM_080926		BMS1P20	IGL|IGLV|IGLV1	BMS1 pseudogene 20	pseudo
5332	chr8	124631089	124631765	+	14	NA	intron (NM_001363300, intron 3 of 12)	intron (NM_001363300, intron 3 of 12)	92304	NM_005005	4715		NM_005005	ENSG00000147684	NDUFB9	B22|CI-B22|LYRM3|MC1DN24|UQOR22	NADH:ubiquinone oxidoreductase subunit B9	protein-coding
4251-2	chr20	38023292	38023911	+	14	NA	intron (NM_014657, intron 1 of 8)	intron (NM_014657, intron 1 of 8)	9855	NM_001303457	9675		NM_014657	ENSG00000101407	TTI1	KIAA0406|NEDMIM|smg-10	TELO2 interacting protein 1	protein-coding
4496-2	chr9	98809814	98810366	+	14	NA	intron (NM_024642, intron 1 of 9)	intron (NM_024642, intron 1 of 9)	2420	NM_024642	79695		NM_024642	ENSG00000119514	GALNT12	CRCS1|GalNAc-T12	polypeptide N-acetylgalactosaminyltransferase 12	protein-coding
2529-2	chr5	54520423	54520868	+	14	NA	3' UTR (NM_052870, exon 1 of 1)	3' UTR (NM_052870, exon 1 of 1)	2886	NM_001145427	112574		NM_052870	ENSG00000178996	SNX18	SH3PX2|SH3PXD3B|SNAG1	sorting nexin 18	protein-coding
2492-2	chr17	73224761	73225162	+	14	NA	intron (NM_001098832, intron 2 of 3)	(ACAGG)n|Simple_repeat|Simple_repeat	2756	NM_001289412	84923		NM_032837	ENSG00000133193	VCF1	FAM104A	VCP nuclear cofactor family member 1	protein-coding
3578	chr11	57289143	57289861	+	14	NA	Intergenic	Intergenic	35450	NM_033396	85456		NM_033396	ENSG00000149115	TNKS1BP1	CNOT12|TAB182	tankyrase 1 binding protein 1	protein-coding
3609	chr9	84670524	84671022	+	14	NA	exon (NM_001018064, exon 2 of 18)	exon (NM_001018064, exon 2 of 18)	424	NM_001369549	4915		NM_006180	ENSG00000148053	NTRK2	DEE58|EIEE58|GP145-TrkB|OBHD|TRKB|trk-B	neurotrophic receptor tyrosine kinase 2	protein-coding
3957	chr4	72031877	72032457	+	14	NA	5' UTR (NM_004885, exon 1 of 4)	5' UTR (NM_004885, exon 1 of 4)	167	NM_004885	10886		NM_004885	ENSG00000056291	NPFFR2	GPR74|HLWAR77|NPFF2|NPGPR	neuropeptide FF receptor 2	protein-coding
2815-3	chr2	105875092	105875653	+	14	NA	intron (NM_001004722, intron 3 of 3)	intron (NM_001004722, intron 3 of 3)	23525	NM_001004720	8440		NM_003581	ENSG00000071051	NCK2	GRB4|NCKbeta	NCK adaptor protein 2	protein-coding
2776-4	chr19	18698192	18698431	+	14	NA	intron (NM_015321, intron 1 of 13)	intron (NM_015321, intron 1 of 13)	14631	NM_015321	23373		NM_015321	ENSG00000105662	CRTC1	MAML2|MECT1|Mam-2|TORC-1|TORC1|WAMTP1	CREB regulated transcription coactivator 1	protein-coding
2852-2	chr7	134910416	134910839	+	14	NA	intron (NM_033140, intron 1 of 11)	intron (NM_033140, intron 1 of 11)	19169	NM_033140	800		NM_004342	ENSG00000122786	CALD1	CDM|H-CAD|HCAD|L-CAD|LCAD|NAG22|h-CD	caldesmon 1	protein-coding
4926	chr22	46116311	46116995	+	14	NA	Intergenic	Intergenic	2967	NR_029479	406884		NR_029479	ENSG00000284520	MIRLET7B	LET7B|MIRNLET7B|hsa-let-7b|let-7b	microRNA let-7b	ncRNA
2670-3	chr15	52182162	52182479	+	14	NA	intron (NR_102751, intron 2 of 2)	intron (NR_102751, intron 2 of 2)	2294	NR_102751	100129973		NR_102751		CERNA1	-	competing endogenous lncRNA 1 for miR-4707-5p and miR-4767	ncRNA
4700	chr5	132002974	132003736	+	14	NA	intron (NM_001205250, intron 1 of 20)	intron (NM_001205250, intron 1 of 20)	8303	NM_015256	23305		NM_015256	ENSG00000164398	ACSL6	ACS2|FACL6|LACS 6|LACS2|LACS5	acyl-CoA synthetase long chain family member 6	protein-coding
2893-3	chr2	201757353	201757964	+	14	NA	exon (NM_020919, exon 5 of 34)	exon (NM_020919, exon 5 of 34)	23275	NM_020919	57679		NM_020919	ENSG00000003393	ALS2	ALS2CR6|ALSJ|IAHSP|PLSJ	alsin Rho guanine nucleotide exchange factor ALS2	protein-coding
3390	chr16	88870644	88871191	+	14	NA	promoter-TSS (NM_001080487)	promoter-TSS (NM_001080487)	-765	NM_001385709	390748		NM_001080487	ENSG00000205022	PABPN1L	PABPNL1|ePABP2	PABPN1 like, cytoplasmic	protein-coding
3405-3	chr3	172152215	172152678	+	14	NA	intron (NM_022763, intron 3 of 25)	intron (NM_022763, intron 3 of 25)	111915	NM_001135095	64778		NM_022763	ENSG00000075420	FNDC3B	FAD104|PRO4979|YVTM2421	fibronectin type III domain containing 3B	protein-coding
4416	chr15	62850644	62851355	+	14	NA	Intergenic	Intergenic	27042	NR_029709	406965		NR_029709	ENSG00000211137	MIR190A	MIR190|MIRN190|hsa-mir-190a|miR-190|mir-190a	microRNA 190a	ncRNA
4461	chr15	99564754	99565306	+	14	NA	promoter-TSS (NM_001365204)	promoter-TSS (NM_001365204)	-387	NM_001352617	4205		NM_005587	ENSG00000068305	MEF2A	ADCAD1|RSRFC4|RSRFC9|mef2	myocyte enhancer factor 2A	protein-coding
2992	chr4	71406538	71406937	+	14	NA	intron (NM_003759, intron 4 of 22)	intron (NM_003759, intron 4 of 22)	67717	NM_003759	8671		NM_003759	ENSG00000080493	SLC4A4	HNBC1|KNBC|NBC1|NBC2|NBCe1|NBCe1-A|SLC4A5|hhNMC|kNBC1|pNBC	solute carrier family 4 member 4	protein-coding
4438-2	chr4	158874721	158875307	+	14	NA	intron (NM_001366843, intron 15 of 17)	AluSx1|SINE|Alu	69175	NM_001366843	57600		NM_020840	ENSG00000052795	FNIP2	FNIPL|MAPO1	folliculin interacting protein 2	protein-coding
4757	chr14	74979479	74980255	+	14	NA	Intergenic	Intergenic	-23054	NM_014239	8892		NM_014239	ENSG00000119718	EIF2B2	EIF-2Bbeta|EIF2B|EIF2Bbeta|VWM2	eukaryotic translation initiation factor 2B subunit beta	protein-coding
5595	chr1	228213181	228213759	+	14	NA	non-coding (NR_073155, exon 1 of 2)	non-coding (NR_073155, exon 1 of 2)	185	NR_073155	574407		NM_001025495	ENSG00000162913	OBSCN-AS1	C1orf145	OBSCN antisense RNA 1	ncRNA
2843-2	chr12	64746081	64746402	+	14	NA	intron (NM_002076, intron 3 of 13)	intron (NM_002076, intron 3 of 13)	13165	NM_002076	2799		NM_002076	ENSG00000135677	GNS	G6S	glucosamine (N-acetyl)-6-sulfatase	protein-coding
3942	chr12	123533003	123533576	+	14	NA	exon (NM_001319243, exon 1 of 8)	exon (NM_001319243, exon 1 of 8)	430	NM_178314	353116		NM_178314	ENSG00000188026	RILPL1	GOSPEL|OPDM4|RLP1	Rab interacting lysosomal protein like 1	protein-coding
3381-2	chr21	34615148	34615641	+	14	NA	promoter-TSS (NM_004414)	promoter-TSS (NM_004414)	-281	NM_004414	1827		NM_004414	ENSG00000159200	RCAN1	ADAPT78|CSP1|DSC1|DSCR1|MCIP1|RCN1	regulator of calcineurin 1	protein-coding
3666-2	chr11	108199119	108199805	+	14	NA	intron (NM_001321307, intron 1 of 17)	LTR27E|LTR|ERV1	23176	NM_001321307	4863		NM_002519	ENSG00000149308	NPAT	E14|E14/NPAT|p220	nuclear protein, coactivator of histone transcription	protein-coding
5500	chr16	11024429	11025080	+	14	NA	intron (NM_001243403, intron 11 of 20)	intron (NM_001243403, intron 11 of 20)	80190	NM_015226	23274		NM_015226	ENSG00000038532	CLEC16A	Gop-1|KIAA0350	C-type lectin domain containing 16A	protein-coding
3482	chr22	50262417	50262819	+	14	NA	promoter-TSS (NM_002969)	promoter-TSS (NM_002969)	-808	NM_001303252	6300		NM_002969	ENSG00000188130	MAPK12	ERK-6|ERK3|ERK6|MAPK 12|P38GAMMA|PRKM12|SAPK-3|SAPK3	mitogen-activated protein kinase 12	protein-coding
3850	chr3	184603995	184604505	+	14	NA	Intergenic	CpG	42465	NM_004443	2049		NM_004443	ENSG00000182580	EPHB3	EK2|ETK2|HEK2|TYRO6	EPH receptor B3	protein-coding
2402	chr18	61898669	61899064	+	14	NA	Intergenic	L2c|LINE|L2	-5859	NM_173557	220441		NM_173557	ENSG00000176641	RNF152	-	ring finger protein 152	protein-coding
5238	chr1	164765196	164765881	+	14	NA	intron (NM_001353131, intron 2 of 7)	intron (NM_001353131, intron 2 of 7)	9103	NR_038072	100505795		NR_038072	ENSG00000233693	PBX1-AS1	-	PBX1 antisense RNA 1	ncRNA
4493	chr3	181712368	181713167	+	14	NA	exon (NM_003106, exon 1 of 1)	exon (NM_003106, exon 1 of 1)	842	NM_003106	6657		NM_003106	ENSG00000181449	SOX2	ANOP3|MCOPS3	SRY-box transcription factor 2	protein-coding
2314-2	chr19	38068299	38068607	+	14	NA	intron (NM_015073, intron 2 of 21)	intron (NM_015073, intron 2 of 21)	-94643	NR_145800	109623473		NR_145800		SNORD152	-	small nucleolar RNA, C/D box 152	snoRNA
2329	chr10	102656668	102656950	+	14	NA	exon (NM_001345950, exon 5 of 5)	exon (NM_001345950, exon 5 of 5)	12314	NM_001345950	81603		NM_030912	ENSG00000171206	TRIM8	FSGSNEDS|GERP|RNF27	tripartite motif containing 8	protein-coding
3274-2	chr13	95404171	95404476	+	14	NA	Intergenic	Intergenic	-29276	NM_182848	9071		NM_006984	ENSG00000134873	CLDN10	CPETRL3|HELIX|OSP-L|OSPL	claudin 10	protein-coding
5798	chr22	23263042	23264281	+	14	NA	non-coding (NR_033408, exon 1 of 1)	non-coding (NR_033408, exon 1 of 1)	894	NR_033408	26226		NM_012165	ENSG00000230701	FBXW4P1	FBW3|FBXW3|SHFM3P1	F-box and WD repeat domain containing 4 pseudogene 1	pseudo
7647	chr18	57798375	57798865	+	14	NA	intron (NM_001374385, intron 1 of 27)	intron (NM_001374385, intron 1 of 27)	4695	NM_001374386	5205		NM_005603	ENSG00000081923	ATP8B1	ATPIC|BRIC|FIC1|ICP1|PFIC|PFIC1	ATPase phospholipid transporting 8B1	protein-coding
3719	chr17	74791292	74791957	+	14	NA	intron (NM_017728, intron 6 of 9)	intron (NM_017728, intron 6 of 9)	15125	NM_017728	54868		NM_017728	ENSG00000109066	TMEM104	SLC38A12	transmembrane protein 104	protein-coding
4600	chr7	44257232	44258287	+	14	NA	intron (NM_172080, intron 4 of 19)	intron (NM_172080, intron 4 of 19)	56781	NM_006555	10652		NM_006555	ENSG00000106636	YKT6	-	YKT6 v-SNARE homolog	protein-coding
3109	chr1	25541053	25541668	+	14	NA	Intergenic	Intergenic	-2246	NM_015627	26119		NM_015627	ENSG00000157978	LDLRAP1	ARH|ARH1|ARH2|FHCB1|FHCB2|FHCL4	low density lipoprotein receptor adaptor protein 1	protein-coding
3897	chr3	177676885	177677493	+	14	NA	intron (NR_047568, intron 3 of 3)	intron (NR_047568, intron 3 of 3)	-139676	NR_110826	102724550		NR_110826	ENSG00000231574	LINC02015	KCCAT211	long intergenic non-protein coding RNA 2015	ncRNA
5686	chr1	227729981	227731196	+	14	NA	TTS (NM_001161465)	TTS (NM_001161465)	2070	NR_136654	116841		NM_053052	ENSG00000143740	SNAP47	C1orf142|ESFI5812|HEL-S-290|HEL170|SNAP-47|SVAP1	synaptosome associated protein 47	protein-coding
2333	chr1	180743	181104	+	14	NA	Intergenic	(ACCCTA)n|Simple_repeat|Simple_repeat	-1465	NR_148357	102725121		NR_148357		DDX11L17	-	DEAD/H-box helicase 11 like 17 (pseudogene)	pseudo
6559	chr8	130299763	130299777	+	14	NA	intron (NM_001362924, intron 3 of 30)	intron (NM_001362924, intron 3 of 30)	-3237	NR_002765	29065		NM_014152		ASAP1-IT1	ASAP1-IT|ASAP1IT|ASAP1IT1|DDEF1IT1|HSPC054|NCRNA00050	ASAP1 intronic transcript 1	ncRNA
4063	chr20	62516322	62517009	+	14	NA	Intergenic	Intergenic	-33788	NM_001302812	128826		NM_178463	ENSG00000174407	MIR1-1HG	C20orf166|MIR133A2HG	MIR1-1 host gene	ncRNA
3542-2	chr19	18986531	18987172	+	14	NA	Intergenic	HAL1M8|LINE|L1	-45634	NM_004838	9454		NM_004838	ENSG00000051128	HOMER3	HOMER-3|VESL3	homer scaffold protein 3	protein-coding
4144-2	chr9	14131435	14132062	+	14	NA	intron (NR_161382, intron 5 of 7)	intron (NR_161382, intron 5 of 7)	49054	NM_001282787	4781		NM_005596	ENSG00000147862	NFIB	CTF|HMGIC/NFIB|MACID|NF-I/B|NF1-B|NFI-B|NFI-RED|NFIB2|NFIB3	nuclear factor I B	protein-coding
4144	chr14	71121603	71122489	+	14	NA	Intergenic	LTR28B|LTR|ERV1	-198430	NM_001354285	26037		NM_015556	ENSG00000197555	SIPA1L1	E6TP1|SPAR1	signal induced proliferation associated 1 like 1	protein-coding
3220-2	chr19	11265765	11266326	+	14	NA	Intergenic	L2|LINE|L2	-3521	NM_001367830	57572		NM_020812	ENSG00000130158	DOCK6	AOS2|ZIR1	dedicator of cytokinesis 6	protein-coding
6657	chr16	88737032	88738459	+	14	NA	exon (NM_001142864, exon 9 of 51)	exon (NM_001142864, exon 9 of 51)	-5022	NR_120387	339059		NR_120387	ENSG00000182376	LOC339059	-	uncharacterized LOC339059	ncRNA
10310	chr2	127104072	127105064	+	14	NA	intron (NM_139345, intron 1 of 15)	intron (NM_139345, intron 1 of 15)	2586	NM_139346	274		NM_004305	ENSG00000136717	BIN1	AMPH2|AMPHL|CNM2|SH3P9	bridging integrator 1	protein-coding
2295-2	chr11	119742570	119743166	+	14	NA	Intergenic	Intergenic	13285	NR_120587	102724301		NR_120587	ENSG00000254854	NECTIN1-DT	-	NECTIN1 divergent transcript	ncRNA
10528	chr10	44260638	44261161	+	14	NA	Intergenic	Intergenic	-31851	NR_164139	100130539		NM_001258000	ENSG00000277288	LINC02881	C10orf142	long intergenic non-protein coding RNA 2881	ncRNA
3457	chr1	179091314	179091575	+	14	NA	intron (NM_022371, intron 4 of 5)	intron (NM_022371, intron 4 of 5)	9374	NM_022371	64222		NM_022371	ENSG00000186283	TOR3A	ADIR|ADIR2	torsin family 3 member A	protein-coding
3091-2	chr5	20647943	20648491	+	14	NA	intron (NR_149120, intron 1 of 11)	L1PA8A|LINE|L1	-32682	NR_147185	105374677		NR_147185		LINC02146	-	long intergenic non-protein coding RNA 2146	ncRNA
3458	chr7	20306460	20306925	+	14	NA	intron (NR_110117, intron 4 of 4)	intron (NR_110117, intron 4 of 4)	9984	NR_110117	101927769		NR_110117	ENSG00000226097	LOC101927769	-	uncharacterized LOC101927769	ncRNA
1674-16	chr21	34073505	34073701	+	14	NA	promoter-TSS (NM_006933)	promoter-TSS (NM_006933)	25	NM_032476	64968		NM_032476	ENSG00000243927	MRPS6	C21orf101|MRP-S6|RPMS6|S6mt|bS6m	mitochondrial ribosomal protein S6	protein-coding
3837	chr17	17849234	17849770	+	14	NA	intron (NM_001288788, intron 10 of 11)	intron (NM_001288788, intron 10 of 11)	-12491	NM_004176	6720		NM_004176	ENSG00000072310	SREBF1	HMD|IFAP2|SREBP1|bHLHd1	sterol regulatory element binding transcription factor 1	protein-coding
3959	chr1	22673800	22674356	+	14	NA	Intergenic	MamSINE1|SINE|tRNA-RTE	20842	NM_001371184	713		NM_000491	ENSG00000173369	C1QB	C1QD2	complement C1q B chain	protein-coding
3640-2	chr4	166400417	166400842	+	14	NA	Intergenic	Intergenic	527392	NM_001204760	7092		NM_012464	ENSG00000038295	TLL1	ASD6|TLL	tolloid like 1	protein-coding
4572	chr9	130170720	130171518	+	14	NA	Intergenic	Intergenic	-1285	NM_014286	23413		NM_014286	ENSG00000107130	NCS1	FLUP|FREQ	neuronal calcium sensor 1	protein-coding
2681-2	chr11	9264486	9264903	+	14	NA	intron (NM_001243254, intron 1 of 22)	intron (NM_001243254, intron 1 of 22)	632	NR_145966	23258		NM_015213	ENSG00000184014	DENND5A	DEE49|EIEE49|RAB6IP1	DENN domain containing 5A	protein-coding
3128-8	chr6_GL000256v2_alt	1512232	1512872	+	14	NA	promoter-TSS (NM_001242783).2	promoter-TSS (NM_001242783).2	-255	NM_003449	7726		NM_003449	ENSG00000234127	TRIM26	AFP|RNF95|ZNF173	tripartite motif containing 26	protein-coding
3865-2	chr5	132002849	132002895	+	14	NA	intron (NM_001205250, intron 1 of 20)	intron (NM_001205250, intron 1 of 20)	8786	NM_015256	23305		NM_015256	ENSG00000164398	ACSL6	ACS2|FACL6|LACS 6|LACS2|LACS5	acyl-CoA synthetase long chain family member 6	protein-coding
2470-2	chr13	31852259	31852678	+	14	NA	intron (NR_027062, intron 1 of 3)	MER74A|LTR|ERVL	5685	NR_027062	196549		NM_145293		EEF1DP3	-	eukaryotic translation elongation factor 1 delta pseudogene 3	pseudo
5530	chr1	222240764	222241715	+	14	NA	Intergenic	LTR22B|LTR|ERVK	-262719	NR_149057	105372950		NR_149057	ENSG00000238042	LINC02257	-	long intergenic non-protein coding RNA 2257	ncRNA
4604-2	chr22	20314436	20314527	+	14	NA	3' UTR (NM_033257, exon 5 of 5)	3' UTR (NM_033257, exon 5 of 5)	5579	NM_033257	85359		NM_033257	ENSG00000128185	DGCR6L	DGCR6	DiGeorge syndrome critical region gene 6 like	protein-coding
2717	chr10	91298504	91298756	+	14	NA	Intergenic	Intergenic	77967	NM_032373	84333		NM_032373	ENSG00000180628	PCGF5	RNF159	polycomb group ring finger 5	protein-coding
5806	chr16	28277610	28278419	+	14	NA	Intergenic	MIR|SINE|MIR	-14511	NM_001024401	388228		NM_001024401	ENSG00000188322	SBK1	SBK	SH3 domain binding kinase 1	protein-coding
3240	chr18	48090216	48090635	+	14	NA	intron (NM_001371291, intron 4 of 6)	intron (NM_001371291, intron 4 of 6)	46723	NM_001039360	201501		NM_001039360	ENSG00000184828	ZBTB7C	APM-1|APM1|ZBTB36|ZNF857C	zinc finger and BTB domain containing 7C	protein-coding
4413	chr9	132409979	132410496	+	14	NA	promoter-TSS (NM_001282957)	promoter-TSS (NM_001282957)	26	NM_207417	389799		NM_207417	ENSG00000188523	CFAP77	C9orf171	cilia and flagella associated protein 77	protein-coding
3560-3	chr20	9810220	9810718	+	14	NA	intron (NM_177990, intron 1 of 9)	AluJb|SINE|Alu	28607	NM_177990	57144		NM_020341	ENSG00000101349	PAK5	PAK7	p21 (RAC1) activated kinase 5	protein-coding
5633	chr19	40277600	40278558	+	14	NA	intron (NM_001243027, intron 1 of 13)	intron (NM_001243027, intron 1 of 13)	4562	NR_030371	693226		NR_030371	ENSG00000207631	MIR641	MIRN641|hsa-mir-641|mir-641	microRNA 641	ncRNA
2933-4	chr4	37244947	37245226	+	14	NA	exon (NM_001144990, exon 1 of 7)	exon (NM_001144990, exon 1 of 7)	343	NM_001144990	57495		NM_001144990	ENSG00000174145	NWD2	KIAA1239	NACHT and WD repeat domain containing 2	protein-coding
4717-2	chr3	51977742	51977938	+	14	NA	intron (NM_001316331, intron 1 of 16)	intron (NM_001316331, intron 1 of 16)	2776	NM_001316331	100526760		NM_001316331	ENSG00000114786	ABHD14A-ACY1	-	ABHD14A-ACY1 readthrough	protein-coding
4310	chr12	92034710	92035282	+	14	NA	intron (NR_132341, intron 1 of 4)	intron (NR_132341, intron 1 of 4)	106717	NR_046159	256021		NM_001256373	ENSG00000257242	LINC01619	C12orf79	long intergenic non-protein coding RNA 1619	ncRNA
4362-2	chr16	67663214	67663814	+	14	NA	TTS (NM_001037281)	TTS (NM_001037281)	2554	NM_016948	50855		NM_016948	ENSG00000102981	PARD6A	PAR-6A|PAR6|PAR6C|PAR6alpha|TAX40|TIP-40	par-6 family cell polarity regulator alpha	protein-coding
4559-2	chr12	342989	343586	+	14	NA	intron (NM_001042603, intron 10 of 27)	L1PA6|LINE|L1	46033	NM_001042603	5927		NM_005056	ENSG00000073614	KDM5A	RBBP-2|RBBP2|RBP2	lysine demethylase 5A	protein-coding
3174-2	chr6	39441156	39441912	+	14	NA	intron (NM_001289021, intron 12 of 21)	intron (NM_001289021, intron 12 of 21)	-10144	NM_001289024	221458		NM_145027	ENSG00000164627	KIF6	C6orf102|dJ1043E3.1|dJ137F1.4|dJ188D3.1	kinesin family member 6	protein-coding
2267-4	chr6	107663392	107663670	+	14	NA	Intergenic	MIR|SINE|MIR	68619	NM_001286409	256380		NM_198081	ENSG00000146285	SCML4	dJ47M23.1	Scm polycomb group protein like 4	protein-coding
3011	chr1	161200522	161201035	+	14	NA	intron (NM_001377301, intron 1 of 13)	intron (NM_001377301, intron 1 of 13)	1463	NM_004550	4720		NM_004550	ENSG00000158864	NDUFS2	CI-49|LHONAR2|MC1DN6	NADH:ubiquinone oxidoreductase core subunit S2	protein-coding
2592-2	chr10	95561313	95561659	+	14	NA	promoter-TSS (NM_001377197)	promoter-TSS (NM_001377197)	-115	NM_015385	10580		NM_006434	ENSG00000095637	SORBS1	CAP|FLAF2|R85FL|SH3D5|SH3P12|SORB1	sorbin and SH3 domain containing 1	protein-coding
3751-3	chr6	161139357	161139918	+	14	NA	intron (NM_020133, intron 7 of 8)	intron (NM_020133, intron 7 of 8)	22345	NR_024277	79992		NM_024929		AGPAT4-IT1	C6orf59|NCRNA00241	AGPAT4 intronic transcript 1	ncRNA
3463-5	chr3	48692564	48693002	+	14	NA	TTS (NR_027438)	TTS (NR_027438)	-6868	NM_016453	51517		NM_016453	ENSG00000213672	NCKIPSD	AF3P21|DIP|DIP1|ORF1|SPIN90|VIP54|WASLBP|WISH	NCK interacting protein with SH3 domain	protein-coding
3033	chr10	33269337	33269824	+	14	NA	intron (NR_045259, intron 2 of 15)	MER1A|DNA|hAT-Charlie	65087	NM_001244972	8829		NM_003873	ENSG00000099250	NRP1	BDCA4|CD304|NP1|NRP|VEGF165R	neuropilin 1	protein-coding
3997	chr12	69879040	69879587	+	14	NA	exon (NM_182530, exon 4 of 25)	exon (NM_182530, exon 4 of 25)	54086	NM_182530	196446		NM_182530	ENSG00000166268	MYRFL	C12orf15|C12orf28|bcm1377	myelin regulatory factor like	protein-coding
4606	chr7	19708441	19709377	+	14	NA	exon (NM_001002926, exon 1 of 4)	exon (NM_001002926, exon 1 of 4)	128	NM_001002926	221830		NM_001002926	ENSG00000105849	POLR1F	A43|RPA43|TWISTNB	RNA polymerase I subunit F	protein-coding
3379-3	chr4	181566412	181566838	+	14	NA	Intergenic	MamGypLTR2b|LTR|Gypsy	263348	NR_147188	105377573		NR_147188	ENSG00000251336	TENM3-AS2	TEMN3-AS1	TENM3 antisense transcript 2	ncRNA
5476	chr11	27215819	27216829	+	14	NA	intron (NR_125767, intron 2 of 4)	MIRb|SINE|MIR	2444	NR_125768	103695435		NR_125766	ENSG00000254560	BBOX1-AS1	-	BBOX1 antisense RNA 1	ncRNA
4191	chr15	40903677	40904466	+	14	NA	TTS (NM_020857)	TTS (NM_020857)	-2738	NR_135836	105370943		NR_135836		LOC105370943	-	uncharacterized LOC105370943	ncRNA
5595-2	chr1	228213944	228214467	+	14	NA	promoter-TSS (NR_073155)	promoter-TSS (NR_073155)	-541	NR_073154	574407		NM_001025495	ENSG00000162913	OBSCN-AS1	C1orf145	OBSCN antisense RNA 1	ncRNA
4570	chr19	4699886	4699972	+	14	NA	intron (NM_001384635, intron 8 of 9)	intron (NM_001384635, intron 8 of 9)	20423	NM_001384611	91039		NM_139159	ENSG00000142002	DPP9	DP9|DPLP9|DPP IX|DPRP-2|DPRP2|HATIS|IMD111	dipeptidyl peptidase 9	protein-coding
2823-6	chr8	98901455	98901924	+	14	NA	intron (NM_001256312, intron 1 of 12)	intron (NM_001256312, intron 1 of 12)	40921	NM_001256312	6788		NM_006281	ENSG00000104375	STK3	KRS1|MST2	serine/threonine kinase 3	protein-coding
3435-2	chrX	72276777	72277584	+	14	NA	promoter-TSS (NM_001007)	promoter-TSS (NM_001007)	68	NM_001007	6191		NM_001007	ENSG00000198034	RPS4X	CCG2|DXS306|RPS4|S4|SCAR|SCR10|eS4	ribosomal protein S4 X-linked	protein-coding
6215	chr19	11347385	11347388	+	14	NA	intron (NM_001080503, intron 1 of 10)	AluSq|SINE|Alu	867	NM_001080503	126075		NM_001080503	ENSG00000183401	CCDC159	-	coiled-coil domain containing 159	protein-coding
2936	chr11	78798485	78799181	+	13	NA	intron (NM_001098816, intron 15 of 33)	intron (NM_001098816, intron 15 of 33)	-223969	NM_024678	79731		NM_024678	ENSG00000137513	NARS2	DFNB94|SLM5|asnRS	asparaginyl-tRNA synthetase 2, mitochondrial	protein-coding
2282-4	chr2	207335426	207335855	+	13	NA	Intergenic	Intergenic	-66216	NR_031633	100302130		NR_031633	ENSG00000221628	MIR1302-4	MIRN1302-4|hsa-mir-1302-4	microRNA 1302-4	ncRNA
2642-3	chr12	98809077	98809405	+	13	NA	intron (NM_001352203, intron 3 of 10)	intron (NM_001352203, intron 3 of 10)	85533	NM_001352224	56899		NM_020140	ENSG00000185046	ANKS1B	AIDA|AIDA-1|ANKS2|EB-1|EB1|cajalin-2	ankyrin repeat and sterile alpha motif domain containing 1B	protein-coding
5692	chr2	100291264	100291840	+	13	NA	intron (NM_001371783, intron 10 of 12)	intron (NM_001371783, intron 10 of 12)	30949	NM_198461	164832		NM_198461	ENSG00000170500	LONRF2	RNF192	LON peptidase N-terminal domain and ring finger 2	protein-coding
3393	chr11	63623566	63623945	+	13	NA	TTS (NM_001290048)	TTS (NM_001290048)	-9286	NM_001128203	11145		NM_007069	ENSG00000176485	PLAAT3	AdPLA|FPLD9|H-REV107|H-REV107-1|HRASLS3|HREV107|HREV107-1|HREV107-3|HRSL3|PLA2G16|PLAAT-3	phospholipase A and acyltransferase 3	protein-coding
1823	chr1	6520055	6520322	+	13	NA	promoter-TSS (NM_198681)	promoter-TSS (NM_198681)	-96	NM_198681	57449		NM_020631	ENSG00000171680	PLEKHG5	ARHGEF45|CMTRIC|DSMA4|GEF720|HMNR4|Syx|Tech	pleckstrin homology and RhoGEF domain containing G5	protein-coding
3713	chr2	102142861	102143395	+	13	NA	intron (NM_000877, intron 1 of 11)	intron (NM_000877, intron 1 of 11)	382	NM_000877	3554		NM_000877	ENSG00000115594	IL1R1	CD121A|CRMO3|D2S1473|IL-1R-alpha|IL-1RT1|IL1R|IL1RA|P80	interleukin 1 receptor type 1	protein-coding
3399-4	chr22	46381385	46381897	+	13	NA	intron (NM_001378328, intron 21 of 34)	intron (NM_001378328, intron 21 of 34)	45927	NM_001282785	55687		NM_018006	ENSG00000100416	TRMU	LCAL3|MTO2|MTU1|TRMT|TRMT1	tRNA mitochondrial 2-thiouridylase	protein-coding
2240-5	chr5	181184006	181184263	+	13	NA	Intergenic	Intergenic	7774	NR_108031	102577426		NR_108031	ENSG00000248473	LINC01962	-	long intergenic non-protein coding RNA 1962	ncRNA
2280-5	chr4	183111542	183111555	+	13	NA	intron (NM_024949, intron 1 of 22)	intron (NM_024949, intron 1 of 22)	12291	NM_024949	80014		NM_024949	ENSG00000151718	WWC2	BOMB	WW and C2 domain containing 2	protein-coding
2668-4	chr22	40010014	40010538	+	13	NA	intron (NM_138435, intron 1 of 4)	intron (NM_138435, intron 1 of 4)	15322	NM_138435	113828		NM_138435	ENSG00000133477	FAM83F	-	family with sequence similarity 83 member F	protein-coding
3895	chr12	132711017	132711533	+	13	NA	intron (NM_001170544, intron 1 of 5)	CpG	433	NM_001170544	192111		NM_138575	ENSG00000247077	PGAM5	BXLBV68	PGAM family member 5, mitochondrial serine/threonine protein phosphatase	protein-coding
3792-2	chr16	31472781	31473644	+	13	NA	promoter-TSS (NM_015927)	promoter-TSS (NM_015927)	7	NM_015927	7041		NM_015927	ENSG00000140682	TGFB1I1	ARA55|HIC-5|HIC5|TSC-5	transforming growth factor beta 1 induced transcript 1	protein-coding
2165-3	chr12	57233367	57233651	+	13	NA	intron (NR_048562, intron 7 of 10)	intron (NR_048562, intron 7 of 10)	3143	NR_048562	6472		NM_005412	ENSG00000182199	SHMT2	GLYA|HEL-S-51e|NEDCASB|SHMT|mSHMT	serine hydroxymethyltransferase 2	protein-coding
3175-2	chr3	95752118	95752524	+	13	NA	Intergenic	L1M1|LINE|L1	-69128	NR_077228	100287639		NR_077228	ENSG00000293294	MTHFD2P1	-	methylenetetrahydrofolate dehydrogenase (NADP+ dependent) 2, methenyltetrahydrofolate cyclohydrolase pseudogene 1	pseudo
2998-4	chr19	50214710	50215152	+	13	NA	intron (NM_024729, intron 2 of 40)	MIRb|SINE|MIR	11303	NM_024729	79784		NM_024729	ENSG00000105357	MYH14	DFNA4|DFNA4A|FP17425|MHC16|MYH17|NMHC II-C|NMHC-II-C|PNMHH|myosin	myosin heavy chain 14	protein-coding
3226	chr4	1729664	1730197	+	13	NA	intron (NM_006342, intron 4 of 15)	LTR13|LTR|ERVK	8409	NM_006342	10460		NM_006342	ENSG00000013810	TACC3	ERIC-1|ERIC1|Tacc4|maskin	transforming acidic coiled-coil containing protein 3	protein-coding
3675	chr16	81403661	81404395	+	13	NA	Intergenic	Intergenic	19010	NR_039871	100616150		NR_039871	ENSG00000284473	MIR4720	-	microRNA 4720	ncRNA
3640	chr17	67466362	67466978	+	13	NA	intron (NM_181671, intron 1 of 9)	intron (NM_181671, intron 1 of 9)	-4819	NR_037517	100500895		NR_037517	ENSG00000207688	MIR548AA2	-	microRNA 548aa-2	ncRNA
5198	chr5	157266436	157267196	+	13	NA	intron (NM_001291722, intron 1 of 31)	intron (NM_001291722, intron 1 of 31)	693	NM_001291721	26999		NM_014376	ENSG00000055163	CYFIP2	DEE65|EIEE65|PIR121	cytoplasmic FMR1 interacting protein 2	protein-coding
1908	chr1	20367104	20367435	+	13	NA	intron (NR_033887, intron 10 of 11)	L2a|LINE|L2	61525	NR_033887	339505		NR_033887		LINC01141	-	long intergenic non-protein coding RNA 1141	ncRNA
4443-2	chr6	75201915	75202465	+	13	NA	intron (NM_004370, intron 2 of 65)	CpG	3863	NM_080645	1303		NM_004370	ENSG00000111799	COL12A1	BA209D8.1|BTHLM2|COL12A1L|DJ234P15.1|EDSMYP|UCMD2	collagen type XII alpha 1 chain	protein-coding
3827-2	chr16	684258	684771	+	13	NA	promoter-TSS (NM_001323920)	promoter-TSS (NM_001323920)	-180	NM_001323919	339123		NM_001005920	ENSG00000161999	JMJD8	C16orf20|PP14397	jumonji domain containing 8	protein-coding
10871	chr3	52402648	52402815	+	13	NA	intron (NM_004656, intron 15 of 16)	intron (NM_004656, intron 15 of 16)	7277	NM_004656	8314		NM_004656	ENSG00000163930	BAP1	HUCEP-13|KURIS|TPDS1|UBM2|UCHL2|UVM2|hucep-6	BRCA1 associated protein 1	protein-coding
3813	chr12	590411	591046	+	13	NA	intron (NM_016533, intron 1 of 3)	intron (NM_016533, intron 1 of 3)	-4242	NR_134624	105369595		NR_134624	ENSG00000256020	LOC105369595	-	uncharacterized LOC105369595	ncRNA
6119	chr3	50243794	50243937	+	13	NA	intron (NM_001282618, intron 1 of 7)	intron (NM_001282618, intron 1 of 7)	-3045	NM_001166425	2771		NM_002070	ENSG00000114353	GNAI2	GIP|GNAI2B|HG1C|H_LUCA15.1|H_LUCA16.1	G protein subunit alpha i2	protein-coding
2563	chr1	6497526	6497834	+	13	NA	promoter-TSS (NM_001042663)	promoter-TSS (NM_001042663)	-268	NM_001042663	57449		NM_020631	ENSG00000171680	PLEKHG5	ARHGEF45|CMTRIC|DSMA4|GEF720|HMNR4|Syx|Tech	pleckstrin homology and RhoGEF domain containing G5	protein-coding
4357	chr12	7121224	7122295	+	13	NA	TTS (NR_026947)	TTS (NR_026947)	7130	NM_031491	83758		NM_031491	ENSG00000139194	RBP5	CRBP-III|CRBP3|CRBPIII|HRBPiso	retinol binding protein 5	protein-coding
4098	chr1	26282524	26282795	+	13	NA	exon (NM_001077262, exon 10 of 11)	exon (NM_001077262, exon 10 of 11)	2573	NM_031286	83442		NM_031286	ENSG00000142669	SH3BGRL3	HEL-S-297|SH3BP-1|TIP-B1	SH3 domain binding glutamate rich protein like 3	protein-coding
2540-3	chr5	93675034	93675422	+	13	NA	intron (NR_028080, intron 8 of 8)	intron (NR_028080, intron 8 of 8)	-54440	NR_031754	100313887		NR_031754	ENSG00000284336	MIR2277	mir-2277	microRNA 2277	ncRNA
2623-3	chr17	79798051	79798504	+	13	NA	Intergenic	CpG-11773	-1200	NM_020649	57332		NM_020649	ENSG00000141570	CBX8	PC3|RC1	chromobox 8	protein-coding
2588	chr10	58816751	58816916	+	13	NA	intron (NM_001080512, intron 18 of 20)	intron (NM_001080512, intron 18 of 20)	101818	NR_027508	728640		NR_027508		FAM133CP	-	family with sequence similarity 133, member A pseudogene	pseudo
4287	chr2	96838705	96838756	+	13	NA	3' UTR (NM_144994, exon 9 of 9)	3' UTR (NM_144994, exon 9 of 9)	5291	NM_144994	200539		NM_144994	ENSG00000163126	ANKRD23	DARP|MARP3	ankyrin repeat domain 23	protein-coding
3674-2	chr20	31880105	31880413	+	13	NA	intron (NR_160277, intron 1 of 12)	intron (NR_160277, intron 1 of 12)	442	NM_001367620	164395		NM_001008409	ENSG00000131044	TTLL9	C20orf125	tubulin tyrosine ligase like 9	protein-coding
3771	chr1	16925771	16926310	+	13	NA	intron (NM_014675, intron 3 of 36)	intron (NM_014675, intron 3 of 36)	4109	NM_014675	9696		NM_014675	ENSG00000058453	CROCC	CROCC1|ROLT|TAX1BP2	ciliary rootlet coiled-coil, rootletin	protein-coding
4287-2	chr2	96839475	96839513	+	13	NA	3' UTR (NM_144994, exon 9 of 9)	3' UTR (NM_144994, exon 9 of 9)	4527	NM_144994	200539		NM_144994	ENSG00000163126	ANKRD23	DARP|MARP3	ankyrin repeat domain 23	protein-coding
4476	chr16	81036656	81037132	+	13	NA	promoter-TSS (NM_001300728)	promoter-TSS (NM_001300728)	-304	NM_001300728	23300		NM_015251	ENSG00000166454	ATMIN	ASCIZ|ZNF822	ATM interactor	protein-coding
6585	chr20	16191038	16191951	+	13	NA	Intergenic	Intergenic	-205612	NR_130924	613266		NR_130924	ENSG00000286546	LOC613266	-	uncharacterized LOC613266	ncRNA
2898-5	chr6	11241627	11241916	+	13	NA	intron (NM_001142393, intron 2 of 7)	intron (NM_001142393, intron 2 of 7)	-9089	NM_001271033	4739		NM_006403	ENSG00000111859	NEDD9	CAS-L|CAS2|CASL|CASS2|HEF1	neural precursor cell expressed, developmentally down-regulated 9	protein-coding
4060	chr17	43456781	43457270	+	13	NA	Intergenic	Intergenic	12219	NR_031751	100313779		NR_031751	ENSG00000284344	MIR2117	-	microRNA 2117	ncRNA
5055	chr5	171622548	171623007	+	13	NA	Intergenic	Intergenic	-163040	NM_001289970	644994		NM_001289970	ENSG00000185662	SMIM23	C5orf50	small integral membrane protein 23	protein-coding
3401-2	chr2	160076233	160076732	+	13	NA	Intergenic	Intergenic	-13867	NM_001007267	22925		NM_007366	ENSG00000153246	PLA2R1	CLEC13C|PLA2-R|PLA2G1R|PLA2IR|PLA2R	phospholipase A2 receptor 1	protein-coding
3525-3	chr4	1036138	1036838	+	13	NA	Intergenic	Intergenic	24024	NM_021923	53834		NM_017862	ENSG00000127418	FGFRL1	FGFR-5|FGFR5|FHFR	fibroblast growth factor receptor like 1	protein-coding
3905-3	chr4	2598503	2599244	+	13	NA	intron (NM_001366318, intron 2 of 20)	L1ME1|LINE|L1	-26559	NR_046335	8603		NM_003704	ENSG00000125386	FAM193A	C4orf8|RES4-22	family with sequence similarity 193 member A	protein-coding
2928-3	chr15	39921022	39921480	+	13	NA	promoter-TSS (NM_007223)	promoter-TSS (NM_007223)	-985	NM_001271854	11245		NM_007223	ENSG00000166073	GPR176	HB-954	G protein-coupled receptor 176	protein-coding
4280	chr12	57183155	57184045	+	13	NA	intron (NM_002332, intron 35 of 88)	intron (NM_002332, intron 35 of 88)	-10904	NR_031597	100302201		NR_031597	ENSG00000221365	MIR1228	MIRN1228|hsa-mir-1228|mir-1228	microRNA 1228	ncRNA
5526	chr8_KI270819v1_alt	68217	69007	+	13	NA	intron (NM_032611, intron 1 of 5)	intron (NM_032611, intron 1 of 5)	10039	NM_032611	11156		NM_007079	ENSG00000184489	PTP4A3	PRL-3|PRL-R|PRL3	protein tyrosine phosphatase 4A3	protein-coding
3169-5	chr5	132837807	132838246	+	13	NA	Intergenic	Intergenic	-7379	NM_001172700	134549		NM_133456	ENSG00000164403	SHROOM1	APXL2	shroom family member 1	protein-coding
2774	chr7	100214199	100214662	+	13	NA	TTS (NM_001282716)	TTS (NM_001282716)	-4818	NM_024070	79037		NM_024070	ENSG00000213413	PVRIG	C7orf15|CD112R	PVR related immunoglobulin domain containing	protein-coding
4425-2	chr5	82019532	82020201	+	13	NA	intron (NM_031482, intron 2 of 7)	LTR78B|LTR|ERV1	47843	NM_001131028	83734		NM_031482	ENSG00000152348	ATG10	APG10|APG10L|pp12616	autophagy related 10	protein-coding
2519	chr2	241769118	241769172	+	13	NA	TTS (NM_152783)	TTS (NM_152783)	-7677	NM_022134	64090		NM_022134	ENSG00000154252	GAL3ST2	GAL3ST-2|GP3ST	galactose-3-O-sulfotransferase 2	protein-coding
4362	chr16	57482305	57482313	+	13	NA	intron (NM_001369618, intron 1 of 7)	AluJb|SINE|Alu	-1932	NM_001369619	55715		NM_018110	ENSG00000125170	DOK4	IRS-5|IRS5	docking protein 4	protein-coding
3986-2	chr19	7507992	7508569	+	13	NA	exon (NM_198534, exon 9 of 9)	exon (NM_198534, exon 9 of 9)	-7823	NM_018083	140467		NM_018083	ENSG00000198816	ZNF358	ZFEND	zinc finger protein 358	protein-coding
5962	chr3	120652376	120652860	+	13	NA	exon (NM_000187, exon 5 of 14)	exon (NM_000187, exon 5 of 14)	29621	NM_000187	3081		NM_000187	ENSG00000113924	HGD	AKU|HGO	homogentisate 1,2-dioxygenase	protein-coding
3836-4	chr5	173884625	173885045	+	13	NA	Intergenic	Intergenic	-3514	NM_030627	80315		NM_030627	ENSG00000113742	CPEB4	CPE-BP4|hCPEB-4	cytoplasmic polyadenylation element binding protein 4	protein-coding
5871	chr12	124734154	124735181	+	13	NA	Intergenic	MLT1J|LTR|ERVL-MaLR	105004	NM_001367982	949		NM_005505	ENSG00000073060	SCARB1	CD36L1|CLA-1|CLA1|HDLCQ6|HDLQTL6|SR-BI|SRB1	scavenger receptor class B member 1	protein-coding
6298	chr15	40907831	40908894	+	13	NA	intron (NR_135836, intron 1 of 1)	intron (NR_135836, intron 1 of 1)	1553	NR_135836	105370943		NR_135836		LOC105370943	-	uncharacterized LOC105370943	ncRNA
3252	chr19	49501508	49502142	+	13	NA	promoter-TSS (NR_029703)	promoter-TSS (NR_029703)	-957	NR_029703	406942		NR_029703	ENSG00000207782	MIR150	MIRN150|miRNA150|mir-150	microRNA 150	ncRNA
3266-3	chr17	82597193	82597693	+	13	NA	intron (NM_004514, intron 8 of 8)	intron (NM_004514, intron 8 of 8)	51001	NM_019613	56270		NM_019613	ENSG00000141580	WDR45B	NEDSBAS|WDR45L|WIPI-3|WIPI3	WD repeat domain 45B	protein-coding
2761-3	chr13	112690283	112690681	+	13	NA	intron (NM_032189, intron 1 of 28)	CpG	153	NM_032189	23250		NM_015205	ENSG00000068650	ATP11A	ATPIH|ATPIS|AUNA2|DFNA84|HLD24	ATPase phospholipid transporting 11A	protein-coding
2826	chr21	42234950	42235494	+	13	NA	intron (NM_207628, intron 4 of 16)	CpG	15324	NM_207174	9619		NM_004915	ENSG00000160179	ABCG1	ABC8|WHITE1	ATP binding cassette subfamily G member 1	protein-coding
3397	chr10	114683499	114684038	+	13	NA	intron (NM_001322884, intron 1 of 20)	intron (NM_001322884, intron 1 of 20)	675	NM_001003407	3983		NM_002313	ENSG00000099204	ABLIM1	ABLIM|LIMAB1|LIMATIN|abLIM-1	actin binding LIM protein 1	protein-coding
2016-3	chr1	162349583	162349647	+	13	NA	intron (NM_014697, intron 6 of 9)	MIRb|SINE|MIR	7069	NR_030283	693141		NR_030283	ENSG00000207729	MIR556	MIRN556|hsa-mir-556|mir-556	microRNA 556	ncRNA
2983-2	chr16	74407215	74407626	+	13	NA	promoter-TSS (NR_135170)	promoter-TSS (NR_135170)	-201	NR_135170	105376772		NR_135170		LOC105376772	-	uncharacterized LOC105376772	ncRNA
3958-5	chr7	5633164	5633472	+	13	NA	intron (NM_207111, intron 15 of 16)	AluSz|SINE|Alu	40502	NM_003088	6624		NM_003088	ENSG00000075618	FSCN1	FAN1|HSN|SNL|p55	fascin actin-bundling protein 1	protein-coding
4835	chr2	85189626	85190446	+	13	NA	intron (NM_031283, intron 3 of 11)	intron (NM_031283, intron 3 of 11)	3627	NR_046797	100874334		NR_046797	ENSG00000231134	TCF7L1-IT1	-	TCF7L1 intronic transcript 1	ncRNA
2827	chr11	27372740	27373360	+	13	NA	intron (NM_018490, intron 15 of 17)	AluJr|SINE|Alu	-9802	NM_080654	91057		NM_030771	ENSG00000109881	CCDC34	L15|NY-REN-41|RAMA3|SPGF76	coiled-coil domain containing 34	protein-coding
3707	chr13	95003266	95003672	+	13	NA	Intergenic	Intergenic	43428	NR_047487	100861544		NR_047487	ENSG00000260962	LINC00557	-	long intergenic non-protein coding RNA 557	ncRNA
2254-6	chr11	66744418	66744682	+	13	NA	promoter-TSS (NM_001302084)	promoter-TSS (NM_001302084)	-186	NM_024650	79703		NM_024650	ENSG00000173715	TOP6BL	C11orf80|HYDM4|TOPOVIBL	TOP6B like initiator of meiotic double strand breaks	protein-coding
3668	chr5	150622314	150622915	+	13	NA	intron (NM_001166209, intron 2 of 2)	intron (NM_001166209, intron 2 of 2)	4970	NM_001166209	11346		NM_007286	ENSG00000171992	SYNPO	SYNPO1	synaptopodin	protein-coding
3205-2	chr18	32333892	32334236	+	13	NA	intron (NM_022751, intron 2 of 5)	intron (NM_022751, intron 2 of 5)	136818	NM_001242409	64762		NM_022751	ENSG00000141441	GAREM1	C18orf11|FAM59A|GAREM|Gm944	GRB2 associated regulator of MAPK1 subtype 1	protein-coding
2114-5	chr14	59028539	59028975	+	13	NA	Intergenic	Intergenic	-159910	NM_001270520	23002		NM_014992	ENSG00000100592	DAAM1	-	dishevelled associated activator of morphogenesis 1	protein-coding
2985-2	chr20	43682909	43683034	+	13	NA	intron (NM_001278610, intron 3 of 12)	intron (NM_001278610, intron 3 of 12)	15857	NM_002466	4605		NM_002466	ENSG00000101057	MYBL2	B-MYB|BMYB	MYB proto-oncogene like 2	protein-coding
2528-3	chr19	40824912	40825312	+	13	NA	Intergenic	Intergenic	-14012	NR_144551	171523		NR_144551	ENSG00000293405	CYP2T1P	CYP2T2P	cytochrome P450 family 2 subfamily T member 1, pseudogene	pseudo
2286-4	chr3	186092480	186092970	+	13	NA	intron (NM_004454, intron 5 of 12)	AluJr|SINE|Alu	16364	NM_004454	2119		NM_004454	ENSG00000244405	ETV5	ERM	ETS variant transcription factor 5	protein-coding
3893-2	chr9	114305614	114306244	+	13	NA	intron (NM_032888, intron 57 of 60)	intron (NM_032888, intron 57 of 60)	-17169	NM_000607	5004		NM_000607	ENSG00000229314	ORM1	A1AG1|AGP-A|AGP1|HEL-S-153w|ORM	orosomucoid 1	protein-coding
2496-5	chr20	50191706	50192102	+	13	NA	exon (NM_005194, exon 1 of 1)	exon (NM_005194, exon 1 of 1)	165	NR_125739	101927559		NR_125739	ENSG00000277449	CEBPB-AS1	-	CEBPB antisense RNA 1	ncRNA
3230-3	chr16	84096679	84097086	+	13	NA	intron (NM_003791, intron 3 of 22)	CR1-3_Croc|LINE|CR1	20060	NM_003791	8720		NM_003791	ENSG00000140943	MBTPS1	PCSK8|S1P|SEDKF|SKI-1	membrane bound transcription factor peptidase, site 1	protein-coding
2612-3	chr18	3526410	3526954	+	13	NA	intron (NM_001242763, intron 8 of 10)	intron (NM_001242763, intron 8 of 10)	60432	NR_110428	100505592		NR_110428	ENSG00000266835	GAPLINC	LINC01540	gastric adenocarcinoma associated, positive CD44 regulator, long intergenic non-coding RNA	ncRNA
3814-2	chr2	129797179	129797578	+	13	NA	Intergenic	Intergenic	80113	NR_149127	105373615		NR_149127	ENSG00000229536	LINC02572	-	long intergenic non-protein coding RNA 2572	ncRNA
1639-2	chr10	111360408	111360566	+	13	NA	Intergenic	Intergenic	246196	NR_159949	113633881		NR_159949		HEAT2	lnc-ADRA2A-1:1	HEart disease Associated Transcript 2	ncRNA
3443-3	chr6	127303842	127304362	+	13	NA	intron (NM_001139510, intron 5 of 5)	L1MA2|LINE|L1	37238	NM_001242850	81847		NM_030963	ENSG00000118518	RNF146	-	ring finger protein 146	protein-coding
6983	chr17	82030125	82031424	+	13	NA	promoter-TSS (NM_005052)	promoter-TSS (NM_005052)	-904	NM_005052	5881		NM_005052	ENSG00000169750	RAC3	-	Rac family small GTPase 3	protein-coding
4367	chr11	64044566	64045168	+	13	NA	intron (NM_001384466, intron 1 of 2)	intron (NM_001384466, intron 1 of 2)	8185	NM_001384466	23769		NM_013280	ENSG00000126500	FLRT1	SPG68	fibronectin leucine rich transmembrane protein 1	protein-coding
5675	chr22_KI270731v1_random	89978	90050	+	13	NA	Intergenic	Intergenic	20872	NR_003267	2679		NR_003267	ENSG00000197421	GGT3P	GGT3	gamma-glutamyltransferase 3 pseudogene	pseudo
2668-6	chr8	101689819	101690186	+	13	NA	intron (NM_032041, intron 3 of 3)	intron (NM_032041, intron 3 of 3)	100967	NM_032041	83988		NM_032041	ENSG00000104490	NCALD	-	neurocalcin delta	protein-coding
3931	chr14	65412856	65413440	+	13	NA	promoter-TSS (NR_024334)	promoter-TSS (NR_024334)	418	NM_001371533	2530		NM_004480	ENSG00000033170	FUT8	CDGF|CDGF1	fucosyltransferase 8	protein-coding
3413-2	chr17	21551182	21551681	+	13	NA	non-coding (NR_160801, exon 1 of 2)	non-coding (NR_160801, exon 1 of 2)	247	NR_160801	339263		NM_001113434	ENSG00000212719	LINC02693	C17orf51	long intergenic non-protein coding RNA 2693	ncRNA
6099	chr16	85227719	85228622	+	13	NA	Intergenic	L2b|LINE|L2	20374	NR_162142	113219463		NR_162142		MIR12128	-	microRNA 12128	ncRNA
3109-5	chr2	110861849	110862320	+	13	NA	intron (NM_001371254, intron 10 of 18)	intron (NM_001371254, intron 10 of 18)	129511	NM_001371254	55289		NM_018308	ENSG00000153093	ACOXL	ACOX4	acyl-CoA oxidase like	protein-coding
3031-3	chr4	47032516	47033113	+	13	NA	intron (NM_000812, intron 3 of 8)	CpG-21171	1247	NM_000812	2560		NM_000812	ENSG00000163288	GABRB1	DEE45|EIEE45	gamma-aminobutyric acid type A receptor subunit beta1	protein-coding
3604	chr16	84617431	84617948	+	13	NA	intron (NM_021149, intron 1 of 3)	CpG-10002	389	NM_021149	23406		NM_021149	ENSG00000103187	COTL1	CLP	coactosin like F-actin binding protein 1	protein-coding
3995-2	chr8	27616693	27617584	+	13	NA	Intergenic	L3b|LINE|CR1	-2438	NM_001831	1191		NM_001831	ENSG00000120885	CLU	AAG4|APO-J|APOJ|CLI|CLU1|CLU2|KUB1|NA1/NA2|SGP-2|SGP2|SP-40|TRPM-2|TRPM2	clusterin	protein-coding
2994-6	chr9	33851980	33852611	+	13	NA	intron (NM_017811, intron 1 of 4)	AluJo|SINE|Alu	35135	NM_017811	54926		NM_017811	ENSG00000107341	UBE2R2	CDC34B|E2-CDC34B|UBC3B	ubiquitin conjugating enzyme E2 R2	protein-coding
3738-4	chr22	23184587	23185358	+	13	NA	intron (NM_021574, intron 1 of 21)	intron (NM_021574, intron 1 of 21)	4463	NM_004327	613		NM_004327	ENSG00000186716	BCR	ALL|BCR1|CML|D22S11|D22S662|PHL	BCR activator of RhoGEF and GTPase	protein-coding
11945	chr2	74528567	74528736	+	13	NA	promoter-TSS (NR_135769)	promoter-TSS (NR_135769)	-754	NR_135769	27429		NM_013247	ENSG00000115317	HTRA2	MGCA8|OMI|PARK13|PRSS25	HtrA serine peptidase 2	protein-coding
3650	chr13	24270510	24271050	+	13	NA	promoter-TSS (NM_001286793)	promoter-TSS (NM_001286793)	30	NM_001286795	221178		NM_153023	ENSG00000182957	SPATA13	ARHGEF29|ASEF2	spermatogenesis associated 13	protein-coding
5334-2	chr17	30376462	30377373	+	13	NA	Intergenic	Intergenic	-2010	NM_001304	1362		NM_001304	ENSG00000108582	CPD	GP180	carboxypeptidase D	protein-coding
5099	chr8	26512364	26513272	+	13	NA	intron (NM_007257, intron 1 of 2)	intron (NM_007257, intron 1 of 2)	1054	NM_007257	10687		NM_007257	ENSG00000240694	PNMA2	MA2|MM2|RGAG2	PNMA family member 2	protein-coding
3954	chr15	90300976	90301703	+	13	NA	Intergenic	Intergenic	-35580	NR_102428	10519		NM_006384	ENSG00000185043	CIB1	CIB|CIBP|EV3|KIP1|PRKDCIP|SIP2-28	calcium and integrin binding 1	protein-coding
3282-2	chr2	127652192	127652541	+	13	NA	3' UTR (NM_001161417, exon 2 of 2)	3' UTR (NM_001161417, exon 2 of 2)	-4113	NM_001256542	55679		NM_017980	ENSG00000072163	LIMS2	LGMD2W|MDRCMTT|PINCH-2|PINCH2	LIM zinc finger domain containing 2	protein-coding
5987	chr17	49880323	49881341	+	13	NA	Intergenic	Intergenic	-32815	NM_001077504	255061		NM_170685	ENSG00000176358	TAC4	EK|HK-1|HK1|PPT-C	tachykinin precursor 4	protein-coding
2754-4	chr4	150050727	150051326	+	13	NA	Intergenic	L2b|LINE|L2	-27419	NM_001040260	166614		NM_152619	ENSG00000170390	DCLK2	CL2|CLICK-II|CLICK2|CLIK2|DCAMKL2|DCDC3|DCDC3B|DCK2	doublecortin like kinase 2	protein-coding
2656	chr5	124717829	124718209	+	13	NA	intron (NM_001385621, intron 1 of 8)	intron (NM_001385621, intron 1 of 8)	28620	NM_001385620	57507		NM_020747	ENSG00000168916	ZNF608	NY-REN-36	zinc finger protein 608	protein-coding
3026	chr3	46895904	46896535	+	13	NA	intron (NM_001184744, intron 4 of 14)	GA-rich|Low_complexity|Low_complexity	13970	NM_001184744	5745		NM_000316	ENSG00000160801	PTH1R	EKNS|PFE|PTHR|PTHR1	parathyroid hormone 1 receptor	protein-coding
5118	chr17	76176714	76177845	+	13	NA	intron (NM_052916, intron 2 of 18)	MER52D|LTR|ERV1	-36034	NM_001454	2302		NM_001454	ENSG00000129654	FOXJ1	CILD43|FKHL13|HFH-4|HFH4	forkhead box J1	protein-coding
2154	chr1	77515574	77515920	+	13	NA	intron (NM_174858, intron 10 of 13)	intron (NM_174858, intron 10 of 13)	166911	NM_001376154	26009		NM_015534	ENSG00000036549	ZZZ3	ATAC1	zinc finger ZZ-type containing 3	protein-coding
3653-2	chr2	72149960	72150556	+	13	NA	Intergenic	Intergenic	-2396	NM_019885	56603		NM_019885	ENSG00000003137	CYP26B1	CYP26A2|P450RAI-2|P450RAI2|RHFCA	cytochrome P450 family 26 subfamily B member 1	protein-coding
5156-2	chr12	109737843	109738525	+	13	NA	intron (NR_026662, intron 1 of 2)	intron (NR_026662, intron 1 of 2)	24359	NM_032829	84915		NM_032829	ENSG00000139438	FAM222A	C12orf34	family with sequence similarity 222 member A	protein-coding
2542-7	chr8	141272264	141272710	+	13	NA	intron (NM_001286646, intron 1 of 8)	L2|LINE|L2	17920	NR_161376	105375787		NR_161376	ENSG00000254019	SLC45A4-AS1	-	SLC45A4 antisense RNA 1	ncRNA
7506	chr1	21905885	21905891	+	13	NA	intron (NM_001291860, intron 1 of 96)	AluJr|SINE|Alu	31422	NM_001291860	3339		NM_005529	ENSG00000142798	HSPG2	HSPG|PLC|PRCAN|SJA|SJS|SJS1	heparan sulfate proteoglycan 2	protein-coding
5962-2	chr3	120652994	120653771	+	13	NA	intron (NM_000187, intron 4 of 13)	intron (NM_000187, intron 4 of 13)	28857	NM_000187	3081		NM_000187	ENSG00000113924	HGD	AKU|HGO	homogentisate 1,2-dioxygenase	protein-coding
2831-3	chr16	31093311	31093634	+	13	NA	intron (NM_001311311, intron 1 of 3)	intron (NM_001311311, intron 1 of 3)	1325	NM_024006	79001		NM_024006	ENSG00000167397	VKORC1	EDTP308|MST134|MST576|VKCFD2|VKOR	vitamin K epoxide reductase complex subunit 1	protein-coding
3560-2	chr16	70282639	70283366	+	13	NA	intron (NM_001605, intron 1 of 20)	intron (NM_001605, intron 1 of 20)	6504	NM_001605	16		NM_001605	ENSG00000090861	AARS1	AARS|CMT2N|DEE29|EIEE29|HDLS2|TTD8	alanyl-tRNA synthetase 1	protein-coding
2661-2	chr10	116737427	116737954	+	13	NA	intron (NM_001330164, intron 2 of 12)	intron (NM_001330164, intron 2 of 12)	4876	NM_025015	259217		NM_025015	ENSG00000165868	HSPA12A	-	heat shock protein family A (Hsp70) member 12A	protein-coding
15953	chr18	48945604	48945910	+	13	NA	intron (NM_005904, intron 2 of 3)	intron (NM_005904, intron 2 of 3)	-2950	NM_001190823	4092		NM_005904	ENSG00000101665	SMAD7	CRCS3|MADH7|MADH8	SMAD family member 7	protein-coding
3499-5	chr9	134026205	134026512	+	13	NA	non-coding (NR_149319, exon 3 of 4)	non-coding (NR_149319, exon 3 of 4)	877	NM_001355256	266655		NM_001355256	ENSG00000235106	BRD3OS	LINC00094|LP2477|NCRNA00094|SERLOC	BRD3 opposite strand	protein-coding
4588-2	chr17	41160107	41160803	+	13	NA	exon (NM_032524, exon 1 of 1)	exon (NM_032524, exon 1 of 1)	293	NM_032524	84616		NM_032524	ENSG00000171396	KRTAP4-4	KAP4.13|KAP4.4|KRTAP4-13|KRTAP4.13|KRTAP4.4	keratin associated protein 4-4	protein-coding
2930	chr13	85509697	85510061	+	13	NA	intron (NR_046989, intron 1 of 3)	L1MCb|LINE|L1	146276	NR_046989	100874137		NR_046989	ENSG00000226317	LINC00351	-	long intergenic non-protein coding RNA 351	ncRNA
2260-11	chr7	55192261	55192842	+	13	NA	intron (NM_001346941, intron 15 of 21)	intron (NM_001346941, intron 15 of 21)	-3602	NR_047551	100507500		NR_047551	ENSG00000224057	EGFR-AS1	-	EGFR antisense RNA 1	ncRNA
16204	chr5	141511027	141511551	+	13	NA	3' UTR (NM_018926, exon 4 of 4)	3' UTR (NM_018926, exon 4 of 4)	22048	NM_032407	56097		NM_018929	ENSG00000240764	PCDHGC5	PCDH-GAMMA-C5	protocadherin gamma subfamily C, 5	protein-coding
2234-4	chr6	26595736	26596215	+	13	NA	promoter-TSS (NM_013375)	promoter-TSS (NM_013375)	-978	NM_013375	29777		NM_013375	ENSG00000146109	ABT1	Esf2|hABT1	activator of basal transcription 1	protein-coding
2959-3	chr7	6516463	6516985	+	13	NA	intron (NM_001145118, intron 7 of 21)	LTR13_|LTR|ERVK	-32572	NM_001100603	11014		NM_006854	ENSG00000136240	KDELR2	ELP-1|ELP1|ERD2.2|OI21	KDEL endoplasmic reticulum protein retention receptor 2	protein-coding
4512	chr10	73807545	73808422	+	13	NA	exon (NM_003635, exon 3 of 15)	exon (NM_003635, exon 3 of 15)	3615	NM_003635	8509		NM_003635	ENSG00000166507	NDST2	HSST2|N-HSST 2|NST2	N-deacetylase and N-sulfotransferase 2	protein-coding
4393	chr16	75267707	75268643	+	13	NA	promoter-TSS (NM_001170715).2	promoter-TSS (NM_001170715).2	-168	NM_001170715	9564		NM_014567	ENSG00000050820	BCAR1	CAS|CAS1|CASS1|CRKAS|P130Cas	BCAR1 scaffold protein, Cas family member	protein-coding
4720-2	chr7	30135574	30136197	+	13	NA	intron (NM_152793, intron 1 of 2)	intron (NM_152793, intron 1 of 2)	899	NM_152793	222166		NM_152793	ENSG00000180354	MTURN	C7orf41|Ells1	maturin, neural progenitor differentiation regulator homolog	protein-coding
3343-3	chr5	175533927	175534557	+	13	NA	Intergenic	Intergenic	55682	NM_001322978	94081		NM_022754	ENSG00000164466	SFXN1	SLC56A1|TCC	sideroflexin 1	protein-coding
4314	chr8	134660615	134661490	+	13	NA	intron (NM_020863, intron 1 of 15)	intron (NM_020863, intron 1 of 15)	35503	NM_001029939	57623		NM_020863	ENSG00000066827	ZFAT	AITD3|ZFAT1|ZNF406	zinc finger and AT-hook domain containing	protein-coding
3958-4	chr7	5632529	5632542	+	13	NA	intron (NM_207111, intron 15 of 16)	intron (NM_207111, intron 15 of 16)	39719	NM_003088	6624		NM_003088	ENSG00000075618	FSCN1	FAN1|HSN|SNL|p55	fascin actin-bundling protein 1	protein-coding
4011	chr12	57450916	57451898	+	13	NA	3' UTR (NM_005538, exon 2 of 2)	3' UTR (NM_005538, exon 2 of 2)	-3900	NM_031479	83729		NM_031479	ENSG00000139269	INHBE	-	inhibin subunit beta E	protein-coding
4196	chr19	2249670	2250377	+	13	NA	promoter-TSS (NR_036207)	promoter-TSS (NR_036207)	-616	NR_036207	100423031		NR_036207	ENSG00000284272	MIR4321	-	microRNA 4321	ncRNA
4371	chr2	168346813	168347399	+	13	NA	Intergenic	Intergenic	-99511	NM_013233	27347		NM_013233	ENSG00000198648	STK39	DCHT|PASK|SPAK	serine/threonine kinase 39	protein-coding
2525-2	chr17	27245035	27245751	+	13	NA	Intergenic	Intergenic	48603	NR_039748	100616277		NR_039748	ENSG00000263583	MIR4522	-	microRNA 4522	ncRNA
3651	chr11	62593612	62594292	+	13	NA	exon (NM_004739, exon 18 of 18)	exon (NM_004739, exon 18 of 18)	-2429	NM_001367906	64852		NM_022830	ENSG00000149016	TUT1	PAPD2|RBM21|STARPAP|TENT1|TUTase|URLC6	terminal uridylyl transferase 1, U6 snRNA-specific	protein-coding
4721	chr13	36903905	36904615	+	13	NA	intron (NM_005905, intron 1 of 5)	intron (NM_005905, intron 1 of 5)	15776	NM_001378621	4093		NM_005905	ENSG00000120693	SMAD9	MADH6|MADH9|PPH2|SMAD8|SMAD8/9|SMAD8A|SMAD8B	SMAD family member 9	protein-coding
1781-4	chr19	44907626	44907959	+	13	NA	exon (NM_001302691, exon 3 of 4)	exon (NM_001302691, exon 3 of 4)	1391	NM_001302690	348		NM_000041	ENSG00000130203	APOE	AD2|APO-E|ApoE4|LDLCQ5|LPG	apolipoprotein E	protein-coding
3101	chr1	168693776	168694042	+	13	NA	Intergenic	Intergenic	35297	NM_001937	1805		NM_001937	ENSG00000143196	DPT	TRAMP	dermatopontin	protein-coding
3164-2	chr9	72461481	72462098	+	13	NA	Intergenic	Intergenic	-59819	NM_138691	117531		NM_138691	ENSG00000165091	TMC1	DFNA36|DFNB11|DFNB7	transmembrane channel like 1	protein-coding
2568	chr16	1019393	1019792	+	13	NA	Intergenic	CpG	37822	NM_014587	30812		NM_014587	ENSG00000005513	SOX8	-	SRY-box transcription factor 8	protein-coding
3520-2	chr9	93675391	93675650	+	13	NA	intron (NM_005392, intron 19 of 21)	intron (NM_005392, intron 19 of 21)	80679	NR_049853	100847045		NR_049853	ENSG00000283146	MIR548AU	-	microRNA 548au	ncRNA
5363	chr3	27360297	27361074	+	13	NA	intron (NM_199347, intron 2 of 24)	intron (NM_199347, intron 2 of 24)	8698	NM_199347	152110		NM_152534	ENSG00000163491	NEK10	CILD44	NIMA related kinase 10	protein-coding
3133-2	chr8	41701830	41702188	+	13	NA	intron (NM_020475, intron 21 of 41)	CpG	-36735	NM_020480	286		NM_000037	ENSG00000029534	ANK1	ANK|SPH1|SPH2|ankyrin-1	ankyrin 1	protein-coding
2618	chr1	32361977	32362425	+	13	NA	promoter-TSS (NM_001167676)	promoter-TSS (NM_001167676)	42	NM_001167676	100128071		NM_001167676	ENSG00000225828	FAM229A	-	family with sequence similarity 229 member A	protein-coding
8560	chr14	104773884	104775053	+	13	NA	intron (NM_001382433, intron 9 of 15)	intron (NM_001382433, intron 9 of 15)	19133	NM_005163	207		NM_005163	ENSG00000142208	AKT1	AKT|PKB|PKB-ALPHA|PRKBA|RAC|RAC-ALPHA	AKT serine/threonine kinase 1	protein-coding
3107-2	chrX	130056078	130056151	+	13	NA	exon (NM_021946, exon 13 of 13)	exon (NM_021946, exon 13 of 13)	54383	NM_001421	2000		NM_001421	ENSG00000102034	ELF4	AIFBL2|ELFR|MEF	E74 like ETS transcription factor 4	protein-coding
2173-2	chr2	1106482	1106513	+	13	NA	intron (NM_018968, intron 4 of 16)	intron (NM_018968, intron 4 of 16)	-155105	NR_136151	101060391		NR_136151		SNTG2-AS1	-	SNTG2 antisense RNA 1	ncRNA
2820	chr1	51977940	51978723	+	13	NA	intron (NM_002867, intron 1 of 4)	MIRc|SINE|MIR	12369	NM_002867	5865		NM_002867	ENSG00000169213	RAB3B	-	RAB3B, member RAS oncogene family	protein-coding
3422-2	chr2	47055683	47056154	+	13	NA	intron (NM_020458, intron 18 of 19)	intron (NM_020458, intron 18 of 19)	99390	NM_173649	285051		NM_173649	ENSG00000239605	STPG4	C2orf61|GSE	sperm-tail PG-rich repeat containing 4	protein-coding
5225	chr8	60704325	60705246	+	13	NA	intron (NM_017780, intron 1 of 37)	intron (NM_017780, intron 1 of 37)	26045	NM_017780	55636		NM_017780	ENSG00000171316	CHD7	CRG|HH5|IS3|KAL5	chromodomain helicase DNA binding protein 7	protein-coding
2321-3	chr6	12545775	12546319	+	13	NA	Intergenic	Intergenic	39357	NR_149140	101928309		NR_149140	ENSG00000234015	LINC02530	-	long intergenic non-protein coding RNA 2530	ncRNA
3969-5	chr3	123429820	123430418	+	13	NA	intron (NM_183357, intron 1 of 20)	intron (NM_183357, intron 1 of 20)	-13777	NM_001199642	111		NM_183357	ENSG00000173175	ADCY5	AC5|DSKOD|FDFM	adenylate cyclase 5	protein-coding
2280	chr1	43998033	43998416	+	13	NA	intron (NR_048548, intron 11 of 12)	intron (NR_048548, intron 11 of 12)	6377	NM_001349129	149473		NM_152499	ENSG00000159214	CCDC24	-	coiled-coil domain containing 24	protein-coding
2799-3	chr2	68248589	68248980	+	13	NA	intron (NM_000945, intron 1 of 5)	L2c|LINE|L2	3748	NM_000945	5534		NM_000945	ENSG00000221823	PPP3R1	CALNB1|CNB|CNB1	protein phosphatase 3 regulatory subunit B, alpha	protein-coding
5736	chr14	71164642	71164718	+	13	NA	Intergenic	Intergenic	-155796	NM_001354285	26037		NM_015556	ENSG00000197555	SIPA1L1	E6TP1|SPAR1	signal induced proliferation associated 1 like 1	protein-coding
3499-4	chr9	134025957	134025965	+	13	NA	non-coding (NR_149319, exon 2 of 4)	non-coding (NR_149319, exon 2 of 4)	480	NM_001355256	266655		NM_001355256	ENSG00000235106	BRD3OS	LINC00094|LP2477|NCRNA00094|SERLOC	BRD3 opposite strand	protein-coding
4055	chr3	108339757	108340530	+	13	NA	intron (NM_007072, intron 2 of 9)	intron (NM_007072, intron 2 of 9)	28358	NM_001282557	11148		NM_007072	ENSG00000114455	HHLA2	B7-H5|B7-H7|B7H7|B7y	HHLA2 member of B7 family	protein-coding
3067-3	chr2	232325804	232326317	+	13	NA	intron (NR_046476, intron 14 of 20)	intron (NR_046476, intron 14 of 20)	-52691	NM_001632	250		NM_001632	ENSG00000163283	ALPP	ALP|ALPI|IAP|PALP|PLAP|PLAP-1	alkaline phosphatase, placental	protein-coding
1989-12	chr5	147509914	147510323	+	13	NA	promoter-TSS (NM_001197294)	promoter-TSS (NM_001197294)	-50	NM_001197294	1809		NM_001387	ENSG00000113657	DPYSL3	CRMP-4|CRMP4|DRP-3|DRP3|LCRMP|ULIP|ULIP-1	dihydropyrimidinase like 3	protein-coding
2699-3	chr14	29758207	29758463	+	13	NA	intron (NM_001330069, intron 1 of 18)	intron (NM_001330069, intron 1 of 18)	168761	NM_001348390	5587		NM_002742	ENSG00000184304	PRKD1	CHDED|PKC-MU|PKCM|PKD|PRKCM	protein kinase D1	protein-coding
4177	chr7	67731856	67732133	+	13	NA	Intergenic	MER63A|DNA|hAT-Blackjack	-288259	NR_120514	102723427		NR_120514	ENSG00000225209	LOC102723427	-	uncharacterized LOC102723427	ncRNA
2732-2	chr18	76772480	76772906	+	13	NA	Intergenic	L1ME3F|LINE|L1	49602	NR_040024	100131655		NR_040024	ENSG00000264278	ZNF236-DT	-	ZNF236 divergent transcript	ncRNA
4224	chr1	77281922	77282654	+	13	NA	promoter-TSS (NM_012093)	promoter-TSS (NM_012093)	269	NM_174858	26289		NM_012093	ENSG00000154027	AK5	AK6	adenylate kinase 5	protein-coding
3281	chr5	2991842	2992439	+	13	NA	Intergenic	Intergenic	74286	NR_136207	105374620		NR_136207		LOC105374620	-	uncharacterized LOC105374620	ncRNA
2970-2	chr1	36099343	36099727	+	13	NA	intron (NM_001294347, intron 3 of 3)	intron (NM_001294347, intron 3 of 3)	10643	NM_017825	54936		NM_017825	ENSG00000116863	ADPRS	ADPRHL2|ARH3|CONDSIAS	ADP-ribosylserine hydrolase	protein-coding
2304-3	chr11	131793607	131794057	+	13	NA	intron (NM_001352006, intron 2 of 9)	intron (NM_001352006, intron 2 of 9)	-116092	NR_147850	50863		NM_016522	ENSG00000182667	NTM	CEPU-1|HNT|IGLON2|NTRI	neurotrimin	protein-coding
5805	chr13	30445484	30446430	+	13	NA	Intergenic	CpG	18370	NM_001313892	3146		NM_002128	ENSG00000189403	HMGB1	HMG-1|HMG1|HMG3|SBP-1	high mobility group box 1	protein-coding
3164	chr9	72461339	72461352	+	13	NA	Intergenic	Intergenic	-60263	NM_138691	117531		NM_138691	ENSG00000165091	TMC1	DFNA36|DFNB11|DFNB7	transmembrane channel like 1	protein-coding
2328-4	chr13	73261709	73262063	+	13	NA	Intergenic	L2c|LINE|L2	202881	NM_001730	688		NM_001730	ENSG00000102554	KLF5	BTEB2|CKLF|IKLF	KLF transcription factor 5	protein-coding
3480	chr7	6348370	6348765	+	13	NA	intron (NM_001037163, intron 1 of 1)	intron (NM_001037163, intron 1 of 1)	400	NM_001037163	84792		NM_032706	ENSG00000178397	FAM220A	ACPIN1|C7orf70|SIPAR	family with sequence similarity 220 member A	protein-coding
3639	chr14	103032080	103032507	+	13	NA	intron (NM_006035, intron 1 of 36)	intron (NM_006035, intron 1 of 36)	25256	NM_006035	9578		NM_006035	ENSG00000198752	CDC42BPB	CHOCNS|MRCKB	CDC42 binding protein kinase beta	protein-coding
2726-3	chr9	38192978	38193346	+	13	NA	Intergenic	Intergenic	-123935	NM_003028	6461		NM_003028	ENSG00000107338	SHB	bA3J10.2	SH2 domain containing adaptor protein B	protein-coding
4164-2	chr8	6855973	6856482	+	13	NA	Intergenic	Intergenic	20673	NR_045217	100652791		NR_045217	ENSG00000245857	GS1-24F4.2	-	uncharacterized LOC100652791	ncRNA
4434	chr15	66841716	66842567	+	13	NA	Intergenic	L2b|LINE|L2	114374	NR_135687	102723481		NR_135687	ENSG00000259289	SMASR	LINC02206	SMAD3 associated long non-coding RNA	ncRNA
2784-5	chr9	104827967	104828427	+	13	NA	intron (NM_005502, intron 15 of 49)	LTR16A|LTR|ERVL	64068	NM_018376	55335		NM_018376	ENSG00000165028	NIPSNAP3B	FP944|NIPSNAP3|SNAP1	nipsnap homolog 3B	protein-coding
2965	chr15	70492749	70493342	+	13	NA	Intergenic	Intergenic	12883	NR_146562	105370880		NR_146562	ENSG00000259473	LINC02205	-	long intergenic non-protein coding RNA 2205	ncRNA
3003	chr2	446370	446818	+	13	NA	Intergenic	Intergenic	46061	NR_146436	727944		NR_146436	ENSG00000223985	LINC01874	-	long intergenic non-protein coding RNA 1874	ncRNA
2088-2	chr1	223207627	223207682	+	13	NA	Intergenic	HERVP71A-int|LTR|ERV1	-64406	NM_003268	7100		NM_003268	ENSG00000187554	TLR5	MELIOS|SLE1|SLEB1|TIL3	toll like receptor 5	protein-coding
4283	chr1	40782510	40783529	+	13	NA	promoter-TSS (NM_004700)	promoter-TSS (NM_004700)	-768	NM_172163	9132		NM_004700	ENSG00000117013	KCNQ4	DFNA2|DFNA2A|KV7.4	potassium voltage-gated channel subfamily Q member 4	protein-coding
4747	chr13	106535812	106536587	+	13	NA	promoter-TSS (NM_001372058)	promoter-TSS (NM_001372058)	-537	NM_004093	1948		NM_004093	ENSG00000125266	EFNB2	EPLG5|HTKL|Htk-L|LERK5|ephrin-B2	ephrin B2	protein-coding
4637	chr16	75110740	75111661	+	13	NA	TTS (NM_194436)	TTS (NM_194436)	5572	NM_153486	197257		NM_153486	ENSG00000166816	LDHD	DLACD|DLD	lactate dehydrogenase D	protein-coding
3072	chr11	65186039	65186593	+	13	NA	exon (NM_005186, exon 6 of 22)	exon (NM_005186, exon 6 of 22)	4388	NM_005186	823		NM_005186	ENSG00000014216	CAPN1	CANP|CANP1|CANPL1|SPG76|muCANP|muCL	calpain 1	protein-coding
2077-6	chr16	58503613	58503772	+	13	NA	intron (NM_001242833, intron 2 of 14)	intron (NM_001242833, intron 2 of 14)	3549	NM_001242833	65009		NM_020465	ENSG00000103034	NDRG4	BDM1|SMAP-8|SMAP8	NDRG family member 4	protein-coding
3410-2	chr3	126537326	126538200	+	13	NA	intron (NM_152889, intron 2 of 2)	intron (NM_152889, intron 2 of 2)	13608	NM_152889	166012		NM_152889	ENSG00000180767	CHST13	C4ST3	carbohydrate sulfotransferase 13	protein-coding
2683	chr10	526746	527204	+	13	NA	intron (NM_014974, intron 1 of 36)	intron (NM_014974, intron 1 of 36)	-101589	NR_147612	101930421		NR_147612	ENSG00000225140	LOC101930421	-	uncharacterized LOC101930421	ncRNA
2776-5	chr3	156558285	156558874	+	13	NA	Intergenic	Intergenic	-3379	NM_001308197	6747		NM_007107	ENSG00000114850	SSR3	TRAPG	signal sequence receptor subunit 3	protein-coding
2784-4	chr6	138537772	138538141	+	13	NA	intron (NM_020464, intron 1 of 6)	MIR|SINE|MIR	34613	NM_020464	57224		NM_020464	ENSG00000135540	NHSL1	C6orf63	NHS like 1	protein-coding
3037	chr1	44784602	44785115	+	13	NA	intron (NM_153274, intron 7 of 8)	intron (NM_153274, intron 7 of 8)	3312	NM_153274	266675		NM_153274	ENSG00000142959	BEST4	VMD2L2	bestrophin 4	protein-coding
2633-4	chr2	138281997	138282575	+	13	NA	Intergenic	HERVL32-int|LTR|ERVL	180402	NR_135526	105373635		NR_135526		LINC01832	-	long intergenic non-protein coding RNA 1832	ncRNA
4469	chr12	48022894	48023467	+	13	NA	Intergenic	Intergenic	-18704	NM_001844	1280		NM_001844	ENSG00000139219	COL2A1	ANFH|AOM|COL11A3|SEDC|STL1	collagen type II alpha 1 chain	protein-coding
2615-2	chr15	73327810	73328415	+	13	NA	intron (NM_005477, intron 4 of 7)	intron (NM_005477, intron 4 of 7)	28202	NR_162148	113219462		NR_162148		MIR12135	-	microRNA 12135	ncRNA
5156	chr12	109737658	109737686	+	13	NA	intron (NR_026662, intron 1 of 2)	intron (NR_026662, intron 1 of 2)	23847	NM_032829	84915		NM_032829	ENSG00000139438	FAM222A	C12orf34	family with sequence similarity 222 member A	protein-coding
2486-3	chr22	20994004	20994514	+	13	NA	exon (NM_006767, exon 14 of 21)	exon (NM_006767, exon 14 of 21)	-7663	NR_027051	439931		NR_027051	ENSG00000230513	THAP7-AS1	-	THAP7 antisense RNA 1	ncRNA
4111	chr9	131744890	131745705	+	13	NA	Intergenic	LTR3A|LTR|ERVK	-5221	NM_001377937	2889		NM_005312	ENSG00000107263	RAPGEF1	C3G|GRF2	Rap guanine nucleotide exchange factor 1	protein-coding
3123-2	chr18	51447212	51447828	+	13	NA	intron (NR_040074, intron 1 of 2)	intron (NR_040074, intron 1 of 2)	55478	NR_040075	100287225		NR_040074	ENSG00000227115	LINC01630	-	long intergenic non-protein coding RNA 1630	ncRNA
3463-3	chr16	11586980	11587594	+	13	NA	promoter-TSS (NM_001136473)	promoter-TSS (NM_001136473)	179	NR_024320	9516		NM_004862	ENSG00000189067	LITAF	PIG7|SIMPLE|TP53I7	lipopolysaccharide induced TNF factor	protein-coding
1815-15	chr9	131278098	131278475	+	13	NA	Intergenic	Intergenic	-1776	NM_033387	286336		NM_033387	ENSG00000126882	FAM78A	C9orf59	family with sequence similarity 78 member A	protein-coding
3222	chr10	59176053	59176448	+	13	NA	promoter-TSS (NM_032439)	promoter-TSS (NM_032439)	214	NR_131782	105682749		NR_131782		CCEPR	CCHE1|lncRNA-CCHE1	cervical carcinoma expressed PCNA regulatory lncRNA	ncRNA
4748	chr19	49560049	49561148	+	13	NA	intron (NM_001270960, intron 2 of 8)	intron (NM_001270960, intron 2 of 8)	19958	NM_001363649	51070		NM_015953	ENSG00000142546	NOSIP	CGI-25	nitric oxide synthase interacting protein	protein-coding
1430-18	chr19	18869986	18870183	+	13	NA	exon (NM_001492, exon 7 of 8)	exon (NM_001492, exon 7 of 8)	26074	NM_021267	10715		NM_021267	ENSG00000223802	CERS1	EPM8|GDF-1|GDF1|LAG1|LASS1|UOG1	ceramide synthase 1	protein-coding
3603	chr1	21829845	21830374	+	13	NA	intron (NM_001291860, intron 85 of 96)	intron (NM_001291860, intron 85 of 96)	17844	NM_001013693	401944		NM_001013693	ENSG00000187942	LDLRAD2	-	low density lipoprotein receptor class A domain containing 2	protein-coding
2690	chr1	145960553	145960938	+	13	NA	exon (NM_001039888, exon 4 of 4)	exon (NM_001039888, exon 4 of 4)	-2728	NM_153713	128077		NM_153713	ENSG00000271601	LIX1L	-	limb and CNS expressed 1 like	protein-coding
3224-2	chr2	209771481	209772138	+	13	NA	promoter-TSS (NM_032504)	promoter-TSS (NM_032504)	-23	NM_182587	285175		NM_032504	ENSG00000144406	UNC80	C2orf21|UNC-80	unc-80 homolog, NALCN channel complex subunit	protein-coding
3222-3	chr5	78510033	78510687	+	13	NA	5' UTR (NM_005779, exon 4 of 5)	5' UTR (NM_005779, exon 4 of 5)	138412	NM_005779	10184		NM_005779	ENSG00000145685	LHFPL2	-	LHFPL tetraspan subfamily member 2	protein-coding
3976	chr18	43559418	43560327	+	13	NA	Intergenic	L1PA15|LINE|L1	-282382	NM_020783	6860		NM_020783	ENSG00000132872	SYT4	HsT1192	synaptotagmin 4	protein-coding
3343	chr12	51269392	51269927	+	13	NA	intron (NM_001031628, intron 1 of 3)	CpG	551	NM_001033873	57228		NM_001031628	ENSG00000170545	SMAGP	hSMAGP	small cell adhesion glycoprotein	protein-coding
4120-2	chr11	33060474	33060806	+	13	NA	intron (NM_001145541, intron 6 of 9)	intron (NM_001145541, intron 6 of 9)	-15510	NR_015451	283267		NR_015451	ENSG00000280798	LINC00294	NCRNA00294	long intergenic non-protein coding RNA 294	ncRNA
4582	chr6	147528049	147528319	+	13	NA	intron (NM_001030060, intron 1 of 1)	intron (NM_001030060, intron 1 of 1)	19494	NM_001030060	389432		NM_001030060	ENSG00000203727	SAMD5	dJ875H10.1	sterile alpha motif domain containing 5	protein-coding
2480	chr6	168061155	168061618	+	13	NA	intron (NR_110312, intron 12 of 15)	intron (NR_110312, intron 12 of 15)	14449	NM_001122841	79981		NM_024919	ENSG00000153303	FRMD1	bA164L23.1	FERM domain containing 1	protein-coding
3697-2	chr6	116958678	116959350	+	13	NA	Intergenic	Intergenic	81772	NM_173560	222546		NM_173560	ENSG00000185002	RFX6	MTCHRS|MTFS|RFXDC1|dJ955L16.1	regulatory factor X6	protein-coding
4384	chr17	2874197	2874676	+	13	NA	intron (NM_001100398, intron 2 of 23)	intron (NM_001100398, intron 2 of 23)	77998	NM_015085	23108		NM_015085	ENSG00000132359	RAP1GAP2	GARNL4|RAP1GA3	RAP1 GTPase activating protein 2	protein-coding
3929-3	chr8	8891288	8891867	+	13	NA	exon (NM_004225, exon 1 of 3)	exon (NM_004225, exon 1 of 3)	2053	NM_004225	9258		NM_004225	ENSG00000147324	MFHAS1	LRRC65|MASL1|ROCO4	multifunctional ROCO family signaling regulator 1	protein-coding
2687-2	chr14	96204665	96205037	+	13	NA	promoter-TSS (NM_000623)	promoter-TSS (NM_000623)	12	NM_000623	624		NM_000623	ENSG00000168398	BDKRB2	B2R|BK-2|BK2|BKR2|BRB2	bradykinin receptor B2	protein-coding
2747-4	chr7	30564231	30564782	+	13	NA	intron (NR_038889, intron 3 of 6)	intron (NR_038889, intron 3 of 6)	13273	NR_038889	401320		NR_038889		GARS1-DT	GARS-DT	GARS1 divergent transcript	ncRNA
1662-5	chr13	112606147	112606768	+	13	NA	Intergenic	CpG	-18272	NM_001286279	10426		NM_006322	ENSG00000126216	TUBGCP3	104p|ALP6|GCP3|Grip104|SPBC98|Spc98|Spc98p	tubulin gamma complex component 3	protein-coding
2732-5	chr2	179787549	179788079	+	13	NA	intron (NM_001352809, intron 1 of 10)	intron (NM_001352809, intron 1 of 10)	-41304	NM_001113397	151126		NM_152520	ENSG00000144331	ZNF385B	ZNF533	zinc finger protein 385B	protein-coding
4366	chr5	176416610	176417236	+	13	NA	promoter-TSS (NR_157088)	promoter-TSS (NR_157088)	-354	NR_045724	1212		NM_001834	ENSG00000175416	CLTB	LCB	clathrin light chain B	protein-coding
5202	chr11	20090746	20091444	+	13	NA	intron (NM_145117, intron 27 of 37)	intron (NM_145117, intron 27 of 37)	-41792	NR_046672	100874014		NR_046672	ENSG00000254453	NAV2-AS2	-	NAV2 antisense RNA 2	ncRNA
4178	chr19	1423466	1424342	+	13	NA	intron (NM_001352035, intron 6 of 10)	CpG	-14492	NM_001018	6209		NM_001018	ENSG00000115268	RPS15	RIG|S15|uS19	ribosomal protein S15	protein-coding
3814	chr10	35396663	35397400	+	13	NA	intron (NM_001282853, intron 2 of 10)	intron (NM_001282853, intron 2 of 10)	60157	NM_001282853	219771		NM_145012	ENSG00000108100	CCNY	C10orf9|CBCP1|CCNX|CFP1	cyclin Y	protein-coding
3394	chr16	50266400	50266944	+	13	NA	5' UTR (NM_001114, exon 1 of 26)	5' UTR (NM_001114, exon 1 of 26)	121	NM_001286057	113		NM_001114	ENSG00000121281	ADCY7	AC7	adenylate cyclase 7	protein-coding
3038-3	chr20	32189278	32190022	+	13	NA	non-coding (NR_002781, exon 1 of 1)	non-coding (NR_002781, exon 1 of 1)	710	NR_002781	128854		NM_178465	ENSG00000235217	TSPY26P	TSPYL3|bA392M18.1	testis specific protein Y-linked 26, pseudogene	pseudo
3113-2	chr5	20972465	20972837	+	13	NA	Intergenic	Intergenic	-357116	NR_147185	105374677		NR_147185		LINC02146	-	long intergenic non-protein coding RNA 2146	ncRNA
3560	chr11	71607887	71608438	+	13	NA	Intergenic	CpG	-25287	NM_001005405	440051		NM_001005405	ENSG00000204571	KRTAP5-11	KRTAP5-5|KRTAP5-6|KRTAP5.11	keratin associated protein 5-11	protein-coding
3298-2	chr2	241572230	241572719	+	13	NA	3' UTR (NM_032515, exon 5 of 5)	3' UTR (NM_032515, exon 5 of 5)	-13331	NR_033346	100379249		NR_033346		BOK-AS1	BOK-AS|BOKAS|NAToB|NCRNA00151	BOK antisense RNA 1	ncRNA
3626-2	chr15	40322904	40323640	+	12	NA	promoter-TSS (NM_001301268)	promoter-TSS (NM_001301268)	-420	NM_001301268	100505573		NM_001301268	ENSG00000259330	INAFM2	LINC00984|OGU1	InaF motif containing 2	protein-coding
2187-7	chr22	36322635	36323004	+	12	NA	intron (NM_002473, intron 5 of 40)	intron (NM_002473, intron 5 of 40)	-35912	NR_106877	102465491		NR_106877	ENSG00000278420	MIR6819	hsa-mir-6819	microRNA 6819	ncRNA
3799-2	chr4	3036967	3037693	+	12	NA	intron (NM_182982, intron 13 of 15)	intron (NM_182982, intron 13 of 15)	37184	NR_045414	100750326		NR_045414		HTT-AS	HTT-AS1|HTTAS	HTT antisense RNA	ncRNA
1716-6	chr17	75720883	75721167	+	12	NA	promoter-TSS (NM_001005731)	promoter-TSS (NM_001005731)	-434	NM_001005731	3691		NM_000213	ENSG00000132470	ITGB4	CD104|GP150|JEB5A|JEB5B	integrin subunit beta 4	protein-coding
3407	chr7	150956029	150956483	+	12	NA	promoter-TSS (NM_001204798)	promoter-TSS (NM_001204798)	-427	NM_172057	3757		NM_000238	ENSG00000055118	KCNH2	ERG-1|ERG1|H-ERG|HERG|HERG1|Kv11.1|LQT2|SQT1	potassium voltage-gated channel subfamily H member 2	protein-coding
2482-6	chr4	3494578	3494827	+	12	NA	TTS (NM_001164673)	TTS (NM_001164673)	10158	NM_001256896	285489		NM_173660	ENSG00000175920	DOK7	C4orf25|CMS10|CMS1B|FADS3	docking protein 7	protein-coding
2884-3	chr9	91904309	91904675	+	12	NA	intron (NM_001318204, intron 1 of 7)	intron (NM_001318204, intron 1 of 7)	45736	NM_001318204	4920		NM_004560	ENSG00000169071	ROR2	BDB|BDB1|NTRKR2	receptor tyrosine kinase like orphan receptor 2	protein-coding
5035	chrX	154526848	154527812	+	12	NA	Intergenic	Intergenic	-11088	NM_001171134	60343		NM_021806	ENSG00000071889	FAM3A	2.19|DLD|DXS560S|XAP-7	FAM3 metabolism regulating signaling molecule A	protein-coding
5182	chr6	52362284	52363512	+	12	NA	intron (NM_133367, intron 1 of 1)	CpG	747	NM_133367	85315		NM_133367	ENSG00000170915	PAQR8	C6orf33|LMPB1|MPRB	progestin and adipoQ receptor family member 8	protein-coding
2850-3	chr4	1629056	1629538	+	12	NA	Intergenic	Intergenic	54694	NM_001013622	152877		NM_001013622	ENSG00000174137	FAM53A	DNTNP	family with sequence similarity 53 member A	protein-coding
4001-2	chr5	110535	110611	+	12	NA	intron (NM_052909, intron 1 of 19)	intron (NM_052909, intron 1 of 19)	18405	NM_052909	153478		NM_052909	ENSG00000153404	PLEKHG4B	ARHGEF48	pleckstrin homology and RhoGEF domain containing G4B	protein-coding
2853-2	chr3	125923744	125924168	+	12	NA	intron (NR_024251, intron 3 of 4)	intron (NR_024251, intron 3 of 4)	7355	NR_024250	100125556		NR_024250	ENSG00000291071	FAM86JP	-	family with sequence similarity 86, member A pseudogene	pseudo
3421	chr11	24234973	24235443	+	12	NA	Intergenic	L1P4a|LINE|L1	-261845	NM_001009909	338645		NM_001009909	ENSG00000187398	LUZP2	KFSP2566|PRO6246	leucine zipper protein 2	protein-coding
3752	chr15	78640416	78641184	+	12	NA	intron (NM_000750, intron 1 of 5)	intron (NM_000750, intron 1 of 5)	410	NM_000750	1143		NM_000750	ENSG00000117971	CHRNB4	-	cholinergic receptor nicotinic beta 4 subunit	protein-coding
4784	chr7	83629126	83630054	+	12	NA	intron (NM_012431, intron 1 of 16)	L1PA7|LINE|L1	11841	NM_001178129	9723		NM_012431	ENSG00000170381	SEMA3E	M-SEMAH|M-SemaK|SEMAH|coll-5	semaphorin 3E	protein-coding
2385-4	chr17	25074377	25074699	+	12	NA	Intergenic	ALR/Alpha|Satellite|centr	2014703	NR_135673	105371703		NR_135673		LOC105371703	-	uncharacterized LOC105371703	ncRNA
2159-4	chr4	108166573	108166969	+	12	NA	promoter-TSS (NM_001166119)	promoter-TSS (NM_001166119)	26	NM_001166119	51176		NM_016269	ENSG00000138795	LEF1	LEF-1|TCF10|TCF1ALPHA|TCF7L3	lymphoid enhancer binding factor 1	protein-coding
3213	chr5	57111813	57112367	+	12	NA	Intergenic	LTR33|LTR|ERVL	-61858	NM_001331037	65056		NM_022913	ENSG00000062194	GPBP1	GPBP|SSH6|VASCULIN	GC-rich promoter binding protein 1	protein-coding
3292	chr19	48735089	48735523	+	12	NA	exon (NM_017805, exon 4 of 12)	exon (NM_017805, exon 4 of 12)	5304	NM_017805	54922		NM_017805	ENSG00000105538	RASIP1	RAIN	Ras interacting protein 1	protein-coding
1568-13	chr6	117265577	117265926	+	12	NA	5' UTR (NM_182645, exon 1 of 4)	5' UTR (NM_182645, exon 1 of 4)	193	NM_153453	245806		NM_153453	ENSG00000170162	VGLL2	VGL2|VITO1	vestigial like family member 2	protein-coding
3399-3	chr18	30361973	30362468	+	12	NA	Intergenic	LTR28C|LTR|ERV1	63310	NR_031684	100302131		NR_031684	ENSG00000283218	MIR302F	MIRN302F|hsa-mir-302f	microRNA 302f	ncRNA
3014	chr2	52386328	52386873	+	12	NA	intron (NR_135239, intron 2 of 2)	intron (NR_135239, intron 2 of 2)	15952	NR_135239	105374596		NR_135239	ENSG00000225444	LINC01867	-	long intergenic non-protein coding RNA 1867	ncRNA
2426-9	chr7	101903125	101903511	+	12	NA	intron (NM_181552, intron 1 of 23)	intron (NM_181552, intron 1 of 23)	85692	NM_181552	1523		NM_001913	ENSG00000257923	CUX1	CASP|CDP|CDP/Cut|CDP1|COY1|CUTL1|CUX|Clox|Cux/CDP|GDDI|GOLIM6|Nbla10317|p100|p110|p200|p75	cut like homeobox 1	protein-coding
3291-4	chr2	8458445	8458726	+	12	NA	Intergenic	Intergenic	125207	NR_110257	101929567		NR_110257	ENSG00000236008	LINC01814	-	long intergenic non-protein coding RNA 1814	ncRNA
2213-5	chr8	141084468	141084782	+	12	NA	Intergenic	Intergenic	-43964	NM_014957	22898		NM_014957	ENSG00000105339	DENND3	-	DENN domain containing 3	protein-coding
2914-5	chr9	91811120	91811512	+	12	NA	intron (NM_001318204, intron 1 of 7)	intron (NM_001318204, intron 1 of 7)	138912	NM_001318204	4920		NM_004560	ENSG00000169071	ROR2	BDB|BDB1|NTRKR2	receptor tyrosine kinase like orphan receptor 2	protein-coding
3138	chr14	103576424	103577078	+	12	NA	intron (NR_126431, intron 4 of 5)	intron (NR_126431, intron 4 of 5)	13791	NR_126431	84334		NM_001302652	ENSG00000256053	COA8	APOP|APOP1|APOPT1|C14orf153|MC4DN17	cytochrome c oxidase assembly factor 8	protein-coding
3926-2	chr9	133521599	133522178	+	12	NA	intron (NM_001080483, intron 1 of 4)	intron (NM_001080483, intron 1 of 4)	3071	NM_001080483	389827		NM_001080483	ENSG00000187616	MYMK	MYOMAKER|TMEM226|TMEM8C	myomaker, myoblast fusion factor	protein-coding
2346-5	chr4	76211677	76212172	+	12	NA	intron (NM_001204255, intron 1 of 8)	intron (NM_001204255, intron 1 of 8)	1900	NM_005506	950		NM_005506	ENSG00000138760	SCARB2	AMRF|CD36L2|EPM4|HLGP85|LGP85|LIMP-2|LIMPII|SR-BII	scavenger receptor class B member 2	protein-coding
5703	chr12	57621560	57622365	+	12	NA	promoter-TSS (NR_120450)	promoter-TSS (NR_120450)	-59	NR_120450	101927583		NR_120450		LOC101927583	-	uncharacterized LOC101927583	ncRNA
3582	chr9	134259824	134260467	+	12	NA	Intergenic	Intergenic	35252	NR_146518	105376310		NR_146518	ENSG00000223729	LINC02247	-	long intergenic non-protein coding RNA 2247	ncRNA
3799	chr20	64063273	64063744	+	12	NA	intron (NM_003195, intron 1 of 9)	CpG	310	NM_003195	6919		NM_003195	ENSG00000171703	TCEA2	TFIIS	transcription elongation factor A2	protein-coding
2762-3	chr19	43526010	43526530	+	12	NA	exon (NM_014297, exon 3 of 7)	exon (NM_014297, exon 3 of 7)	931	NM_014297	23474		NM_014297	ENSG00000105755	ETHE1	HSCO|YF13H12	ETHE1 persulfide dioxygenase	protein-coding
2884-2	chr16	70693253	70693324	+	12	NA	intron (NM_001351157, intron 16 of 17)	intron (NM_001351157, intron 16 of 17)	-7235	NM_138383	92154		NM_138383	ENSG00000132613	MTSS2	ABBA|ABBA-1|ABBA1|IDDOF|MTSS1L	MTSS I-BAR domain containing 2	protein-coding
2707-4	chr9	117412091	117412471	+	12	NA	intron (NM_014010, intron 1 of 21)	intron (NM_014010, intron 1 of 21)	2776	NM_001365069	23245		NM_014010	ENSG00000148219	ASTN2	bA67K19.1	astrotactin 2	protein-coding
3330-4	chr2	232633113	232633488	+	12	NA	promoter-TSS (NM_025202)	promoter-TSS (NM_025202)	-304	NM_025202	80303		NM_025202	ENSG00000115468	EFHD1	MST133|MSTP133|PP3051|SWS2	EF-hand domain family member D1	protein-coding
2466	chr17	59423390	59423743	+	12	NA	Intergenic	Intergenic	57483	NR_039882	100616204		NR_039882	ENSG00000263857	MIR4729	-	microRNA 4729	ncRNA
4154-2	chr9	123353817	123354858	+	12	NA	Intergenic	Intergenic	-1860	NM_173689	286204		NM_173689	ENSG00000148204	CRB2	FSGS9|VMCKD	crumbs cell polarity complex component 2	protein-coding
2065-3	chr17	17537186	17537760	+	12	NA	intron (NM_148172, intron 2 of 6)	(CCAGC)n|Simple_repeat|Simple_repeat	40023	NM_148173	10400		NM_007169	ENSG00000133027	PEMT	PEAMT|PEMPT|PEMT2|PLMT|PNMT	phosphatidylethanolamine N-methyltransferase	protein-coding
1749-5	chr3	134250727	134251149	+	12	NA	promoter-TSS (NM_002958)	promoter-TSS (NM_002958)	-79	NM_002958	6259		NM_002958	ENSG00000163785	RYK	D3S3195|JTK5|JTK5A|RYK1	receptor like tyrosine kinase	protein-coding
2207-4	chr12	67772547	67773078	+	12	NA	Intergenic	Intergenic	-43337	NR_110063	101927901		NR_110063	ENSG00000255970	LINC02421	-	long intergenic non-protein coding RNA 2421	ncRNA
3576-2	chr12	124863342	124863994	+	12	NA	non-coding (NR_160419, exon 1 of 12)	non-coding (NR_160419, exon 1 of 12)	196	NM_001367989	949		NM_005505	ENSG00000073060	SCARB1	CD36L1|CLA-1|CLA1|HDLCQ6|HDLQTL6|SR-BI|SRB1	scavenger receptor class B member 1	protein-coding
2723	chr16	14237514	14237774	+	12	NA	intron (NM_001365414, intron 7 of 14)	L2a|LINE|L2	50958	NM_001365415	57496		NM_014048	ENSG00000186260	MRTFB	MKL2|MRTF-B|NPD001	myocardin related transcription factor B	protein-coding
2258-2	chr13	35309465	35309962	+	12	NA	intron (NM_001385012, intron 36 of 58)	intron (NM_001385012, intron 36 of 58)	166976	NM_005584	4081		NM_005584	ENSG00000180660	MAB21L1	CAGR1|COFG|Nbla00126	mab-21 like 1	protein-coding
4320-2	chr8	38465252	38465735	+	12	NA	intron (NM_001174067, intron 1 of 18)	intron (NM_001174067, intron 1 of 18)	2231	NM_001174065	2260		NM_015850	ENSG00000077782	FGFR1	BFGFR|CD331|CEK|ECCL|FGFBR|FGFR-1|FLG|FLT-2|FLT2|HBGFR|HH2|HRTFDS|KAL2|N-SAM|OGD|bFGF-R-1	fibroblast growth factor receptor 1	protein-coding
5964	chr1	44522663	44524165	+	12	NA	intron (NM_001319957, intron 1 of 13)	intron (NM_001319957, intron 1 of 13)	-22079	NR_049849	100847089		NR_049849	ENSG00000263381	MIR5584	-	microRNA 5584	ncRNA
3212-2	chr14	80926382	80926994	+	12	NA	intron (NR_157142, intron 2 of 24)	L1PB3|LINE|L1	15050	NR_157142	145508		NM_152446	ENSG00000100629	CEP128	C14orf145|C14orf61|LEDP/132	centrosomal protein 128	protein-coding
2252	chr1	91387238	91387548	+	12	NA	intron (NR_165455, intron 4 of 32)	LSU-rRNA_Hsa|rRNA|rRNA	17342	NR_165455	164045		NM_001017975	ENSG00000162669	HFM1	MER3|POF9|SEC63D1|Si-11|Si-11-6|helicase	helicase for meiosis 1	protein-coding
3584	chr17	57532553	57533236	+	12	NA	intron (NM_170721, intron 6 of 9)	intron (NM_170721, intron 6 of 9)	-9297	NR_110808	101927557		NR_110808	ENSG00000266100	LOC101927557	-	uncharacterized LOC101927557	ncRNA
3812-2	chr19	4229473	4229763	+	12	NA	promoter-TSS (NM_005755)	promoter-TSS (NM_005755)	95	NM_005755	10148		NM_005755	ENSG00000105246	EBI3	IL-27B|IL27B|IL35B	Epstein-Barr virus induced 3	protein-coding
3707-3	chr4	7259680	7259984	+	12	NA	intron (NM_020777, intron 1 of 26)	MIRb|SINE|MIR	-50618	NR_039961	100616471		NR_039961	ENSG00000264658	MIR4798	-	microRNA 4798	ncRNA
6047	chr9	137234302	137235767	+	12	NA	intron (NM_080877, intron 12 of 12)	intron (NM_080877, intron 12 of 12)	4101	NM_080877	142680		NM_080877	ENSG00000198569	SLC34A3	HHRH|NPT2C|NPTIIc	solute carrier family 34 member 3	protein-coding
3011-2	chr19	4866500	4867095	+	12	NA	intron (NM_005817, intron 1 of 7)	intron (NM_005817, intron 1 of 7)	870	NM_001164194	10226		NM_005817	ENSG00000105355	PLIN3	M6PRBP1|PP17|TIP47	perilipin 3	protein-coding
3536	chr3	60046104	60046847	+	12	NA	intron (NM_001320901, intron 2 of 6)	intron (NM_001320901, intron 2 of 6)	34434	NM_001320901	2272		NM_002012	ENSG00000189283	FHIT	AP3Aase|FRA3B	fragile histidine triad diadenosine triphosphatase	protein-coding
5933	chr1	5746589	5746635	+	12	NA	Intergenic	Intergenic	116129	NR_039838	100616421		NR_039838	ENSG00000264101	MIR4689	mir-4689	microRNA 4689	ncRNA
3001-2	chr19	39320080	39320609	+	12	NA	intron (NM_020862, intron 1 of 4)	intron (NM_020862, intron 1 of 4)	519	NM_020862	57622		NM_020862	ENSG00000128011	LRFN1	SALM2	leucine rich repeat and fibronectin type III domain containing 1	protein-coding
2495-2	chr22	44693144	44693592	+	12	NA	intron (NM_001198721, intron 2 of 9)	AluJo|SINE|Alu	-8830	NM_181334	553158		NM_181334	ENSG00000248405	PRR5-ARHGAP8	-	PRR5-ARHGAP8 readthrough	protein-coding
2699	chr1	47437678	47438016	+	12	NA	promoter-TSS (NR_126355)	promoter-TSS (NR_126355)	-197	NM_004474	2306		NM_004474	ENSG00000186564	FOXD2	FKHL17|FREAC-9|FREAC9	forkhead box D2	protein-coding
3337-3	chr22	46670072	46670541	+	12	NA	intron (NM_001366660, intron 13 of 17)	intron (NM_001366660, intron 13 of 17)	49920	NM_015124	23151		NM_015124	ENSG00000075240	GRAMD4	DIP	GRAM domain containing 4	protein-coding
2527-2	chr14	89452129	89452219	+	12	NA	intron (NM_001085471, intron 1 of 6)	intron (NM_001085471, intron 1 of 6)	34820	NR_036500	400236		NR_036500	ENSG00000258920	FOXN3-AS1	-	FOXN3 antisense RNA 1	ncRNA
2188-5	chr2	225471573	225472028	+	12	NA	intron (NM_001371273, intron 3 of 7)	MIRb|SINE|MIR	70914	NM_020864	57624		NM_020864	ENSG00000144460	NYAP2	KIAA1486	neuronal tyrosine-phosphorylated phosphoinositide-3-kinase adaptor 2	protein-coding
3455-4	chr3	49903644	49904304	+	12	NA	promoter-TSS (NM_001318913)	promoter-TSS (NM_001318913)	-101	NM_002447	4486		NM_002447	ENSG00000164078	MST1R	CD136|CDw136|NPCA3|PTK8|RON|SEA|p185-Ron	macrophage stimulating 1 receptor	protein-coding
3211-5	chr17	64662429	64662914	+	12	NA	promoter-TSS (NM_022739)	promoter-TSS (NM_022739)	-364	NM_022739	64750		NM_022739	ENSG00000108854	SMURF2	-	SMAD specific E3 ubiquitin protein ligase 2	protein-coding
3012-3	chr12	57223246	57223658	+	12	NA	intron (NM_007224, intron 1 of 1)	intron (NM_007224, intron 1 of 1)	-6259	NR_029417	6472		NM_005412	ENSG00000182199	SHMT2	GLYA|HEL-S-51e|NEDCASB|SHMT|mSHMT	serine hydroxymethyltransferase 2	protein-coding
2524-7	chr4	41204504	41204767	+	12	NA	intron (NM_173075, intron 1 of 16)	intron (NM_173075, intron 1 of 16)	9907	NM_001330658	323		NM_004307	ENSG00000163697	APBB2	FE65L|FE65L1	amyloid beta precursor protein binding family B member 2	protein-coding
2649-2	chr16	2426399	2426613	+	12	NA	non-coding (NR_003574, exon 17 of 17)	non-coding (NR_003574, exon 17 of 17)	-2941	NM_001323538	899		NM_001761	ENSG00000162063	CCNF	FBX1|FBXO1|FTDALS5	cyclin F	protein-coding
3107	chr11	10792118	10792731	+	12	NA	Intergenic	Intergenic	9184	NR_004403	692223		NR_004403	ENSG00000238622	SNORD97	U97	small nucleolar RNA, C/D box 97	snoRNA
2340	chr16	85316488	85316850	+	12	NA	Intergenic	Intergenic	-10344	NR_049816	100847022		NR_049816	ENSG00000266307	MIR5093	-	microRNA 5093	ncRNA
4676	chr1	27427996	27428126	+	12	NA	intron (NM_006990, intron 2 of 8)	intron (NM_006990, intron 2 of 8)	35439	NM_005281	2827		NM_005281	ENSG00000181773	GPR3	ACCA	G protein-coupled receptor 3	protein-coding
3021-2	chr3	170438188	170438645	+	12	NA	Intergenic	Intergenic	15313	NR_106886	102465497		NR_106886	ENSG00000283474	MIR6828	hsa-mir-6828	microRNA 6828	ncRNA
4075-2	chr16	48097716	48098479	+	12	NA	intron (NM_033226, intron 21 of 28)	(AC)n|Simple_repeat|Simple_repeat	48673	NM_033226	94160		NM_033226	ENSG00000140798	ABCC12	MRP9	ATP binding cassette subfamily C member 12	protein-coding
2305-2	chr1	110356368	110356783	+	12	NA	Intergenic	Intergenic	17198	NM_022768	64783		NM_014092	ENSG00000162775	RBM15	OTT|OTT1|SPEN	RNA binding motif protein 15	protein-coding
3091	chr17	1979535	1980116	+	12	NA	intron (NM_178568, intron 1 of 1)	intron (NM_178568, intron 1 of 1)	-37891	NR_135642	105371485		NR_135642	ENSG00000228133	LOC105371485	-	uncharacterized LOC105371485	ncRNA
4037	chr17	75428942	75429487	+	12	NA	Intergenic	Intergenic	23145	NR_037449	100500841		NR_037449	ENSG00000264511	MIR3678	mir-3678	microRNA 3678	ncRNA
2470-3	chr9	90754997	90755064	+	12	NA	Intergenic	SATR1|Satellite|Satellite	-46570	NM_001174168	6850		NM_003177	ENSG00000165025	SYK	IMD82|p72-Syk	spleen associated tyrosine kinase	protein-coding
3508	chr20	3740202	3740313	+	12	NA	intron (NM_001318322, intron 2 of 11)	intron (NM_001318322, intron 2 of 11)	7572	NM_001197327	116835		NM_052970	ENSG00000132622	HSPA12B	C20orf60	heat shock protein family A (Hsp70) member 12B	protein-coding
2827-3	chr21	44295861	44296276	+	12	NA	intron (NM_000383, intron 12 of 13)	MIR1_Amn|SINE|MIR	-3985	NM_002626	5211		NM_002626	ENSG00000141959	PFKL	ATP-PFK|PFK-B|PFK-L	phosphofructokinase, liver type	protein-coding
3137	chr1	202005051	202005195	+	12	NA	intron (NM_001319184, intron 9 of 9)	intron (NM_001319184, intron 9 of 9)	1999	NR_106798	102465443		NR_106798	ENSG00000275207	MIR6740	hsa-mir-6740	microRNA 6740	ncRNA
4518	chr17	36938252	36939079	+	12	NA	intron (NM_005568, intron 1 of 4)	CpG-11024	1190	NM_005568	3975		NM_005568	ENSG00000273706	LHX1	LIM-1|LIM1	LIM homeobox 1	protein-coding
3101-3	chr13	57629657	57630130	+	12	NA	Intergenic	CpG	-1851	NM_001040429	27253		NM_014459	ENSG00000118946	PCDH17	PCDH68|PCH68	protocadherin 17	protein-coding
6611	chr22	20285367	20286318	+	12	NA	Intergenic	Intergenic	-17524	NM_023004	65078		NM_023004	ENSG00000040608	RTN4R	NGR|NOGOR	reticulon 4 receptor	protein-coding
2157-2	chr10	80256586	80257359	+	12	NA	Intergenic	Intergenic	9214	NR_136612	100130698		NR_136612		LOC100130698	-	uncharacterized LOC100130698	ncRNA
3880-2	chr6	16277514	16278251	+	12	NA	intron (NM_006877, intron 5 of 8)	L2b|LINE|L2	39295	NM_006877	2766		NM_006877	ENSG00000137198	GMPR	GMPR 1|GMPR1	guanosine monophosphate reductase	protein-coding
2720-6	chr6	10158708	10159185	+	12	NA	Intergenic	Intergenic	-245556	NR_145448	109729173		NR_145448	ENSG00000285278	TFAP2A-AS2	HIPSTR	TFAP2A antisense RNA 2	ncRNA
2501	chr1	205229597	205229877	+	12	NA	promoter-TSS (NM_001375652)	promoter-TSS (NM_001375652)	22	NM_001375651	9911		NM_014858	ENSG00000133069	TMCC2	HUCEP11	transmembrane and coiled-coil domain family 2	protein-coding
4720	chr1	202122417	202123434	+	12	NA	promoter-TSS (NM_004767)	promoter-TSS (NM_004767)	8	NM_004767	9283		NM_004767	ENSG00000170075	GPR37L1	ET(B)R-LP-2|ETBR-LP-2|ETBRLP2	G protein-coupled receptor 37 like 1	protein-coding
4676-2	chr1	27428306	27428991	+	12	NA	intron (NM_006990, intron 2 of 8)	intron (NM_006990, intron 2 of 8)	36026	NM_005281	2827		NM_005281	ENSG00000181773	GPR3	ACCA	G protein-coupled receptor 3	protein-coding
4080	chr15_KI270905v1_alt	4815891	4816907	+	12	NA	intron (NM_001282494, intron 13 of 18).5	intron (NM_001282494, intron 13 of 18).5	8358	NM_001355469	653075		NM_001355469	ENSG00000261247	GOLGA8T	-	golgin A8 family member T	protein-coding
4812	chr2	42768111	42768759	+	12	NA	intron (NM_012205, intron 7 of 9)	intron (NM_012205, intron 7 of 9)	-4174	NM_148962	165140		NM_148962	ENSG00000162881	OXER1	GPCR|GPR170|TG1019	oxoeicosanoid receptor 1	protein-coding
2835	chr2	181457208	181457882	+	12	NA	5' UTR (NM_001316312, exon 1 of 5)	5' UTR (NM_001316312, exon 1 of 5)	159	NM_000885	3676		NM_000885	ENSG00000115232	ITGA4	CD49D|IA4	integrin subunit alpha 4	protein-coding
5100	chr22	20494674	20495467	+	12	NA	intron (NR_033825, intron 1 of 5)	intron (NR_033825, intron 1 of 5)	725	NM_032775	84861		NM_032775	ENSG00000099910	KLHL22	KELCHL	kelch like family member 22	protein-coding
4172	chr10	68250858	68251558	+	12	NA	Intergenic	Intergenic	-19095	NM_145178	220202		NM_145178	ENSG00000179774	ATOH7	Math5|NCRNA|PHPVAR|RNANC|bHLHa13	atonal bHLH transcription factor 7	protein-coding
2996	chr2	87539299	87539809	+	12	NA	Intergenic	Intergenic	69604	NR_146460	112597		NR_024204	ENSG00000222041	CYTOR	C2orf59|LINC00152|NCRNA00152	cytoskeleton regulator RNA	ncRNA
3620	chr18	52435259	52435769	+	12	NA	intron (NM_005215, intron 1 of 28)	intron (NM_005215, intron 1 of 28)	95317	NM_005215	1630		NM_005215	ENSG00000187323	DCC	CRC18|CRCR1|HGPPS2|IGDCC1|MRMV1|NTN1R1	DCC netrin 1 receptor	protein-coding
3764-3	chr9	33454093	33454935	+	12	NA	Intergenic	MIRc|SINE|MIR	-6921	NM_001318144	360		NM_004925	ENSG00000165272	AQP3	AQP-3|GIL	aquaporin 3 (Gill blood group)	protein-coding
4438-3	chr9	103533092	103533674	+	12	NA	Intergenic	L1PA14|LINE|L1	-208350	NR_121578	101928496		NR_121578	ENSG00000225564	LINC01492	-	long intergenic non-protein coding RNA 1492	ncRNA
3343-2	chr16	69858870	69859307	+	12	NA	intron (NM_001270455, intron 6 of 8)	MLT1E2|LTR|ERVL-MaLR	20351	NM_001270453	11060		NM_007014	ENSG00000198373	WWP2	AIP2|WWp2-like	WW domain containing E3 ubiquitin protein ligase 2	protein-coding
4086-2	chrX	54183295	54183863	+	12	NA	promoter-TSS (NM_198456)	promoter-TSS (NM_198456)	-325	NM_001300788	54954		NM_017848	ENSG00000184083	FAM120C	CXorf17|ORF34	family with sequence similarity 120 member C	protein-coding
2153-4	chr10	46268576	46269094	+	12	NA	intron (NR_103827, intron 1 of 4)	intron (NR_103827, intron 1 of 4)	773	NR_103828	100996567		NR_103827		ANTXRLP1	-	ANTXR like pseudogene 1	pseudo
2590-7	chr5	154521060	154521423	+	12	NA	Intergenic	Intergenic	-43014	NM_004821	9421		NM_004821	ENSG00000113196	HAND1	Hxt|Thing1|bHLHa27|eHand	heart and neural crest derivatives expressed 1	protein-coding
2337-2	chr11	65184143	65184545	+	12	NA	intron (NM_001198868, intron 4 of 21)	CpG	2416	NM_005186	823		NM_005186	ENSG00000014216	CAPN1	CANP|CANP1|CANPL1|SPG76|muCANP|muCL	calpain 1	protein-coding
2742-4	chr7	129782338	129782725	+	12	NA	Intergenic	CpG	-7517	NR_029615	406959		NR_029615	ENSG00000207691	MIR183	MIRN183|miR-183|miRNA183	microRNA 183	ncRNA
3186	chr2	190343237	190343633	+	12	NA	promoter-TSS (NM_002194)	promoter-TSS (NM_002194)	-154	NM_002194	3628		NM_002194	ENSG00000151689	INPP1	-	inositol polyphosphate-1-phosphatase	protein-coding
2626-7	chr9	123383953	123384284	+	12	NA	intron (NM_020946, intron 20 of 21)	intron (NM_020946, intron 20 of 21)	15339	NR_104603	286204		NM_173689	ENSG00000148204	CRB2	FSGS9|VMCKD	crumbs cell polarity complex component 2	protein-coding
3636	chr6	43857203	43857850	+	12	NA	Intergenic	Intergenic	-5193	NR_149142	285857		NR_149142	ENSG00000283215	LINC02537	-	long intergenic non-protein coding RNA 2537	ncRNA
2348-2	chr15	40922525	40922953	+	12	NA	Intergenic	Intergenic	-6601	NM_019074	54567		NM_019074	ENSG00000128917	DLL4	AOS6|delta4|hdelta2	delta like canonical Notch ligand 4	protein-coding
3414	chr10	108594723	108595115	+	12	NA	Intergenic	Intergenic	-525626	NR_125760	103695365		NR_125760	ENSG00000229981	LINC01435	TCONS_00018040	long intergenic non-protein coding RNA 1435	ncRNA
4229	chr12	48891215	48891444	+	12	NA	Intergenic	Intergenic	-12804	NM_033124	85478		NM_033124	ENSG00000139537	CCDC65	CFAP250|DRC2|FAP250|NYD-SP28	coiled-coil domain containing 65	protein-coding
3755	chr3	11846372	11847035	+	12	NA	non-coding (NR_104314, exon 1 of 10)	non-coding (NR_104314, exon 1 of 10)	182	NR_158712	132001		NM_138807	ENSG00000144559	TAMM41	C3orf31|COXPD56|RAM41|TAM41	TAM41 mitochondrial translocator assembly and maintenance homolog	protein-coding
2265-4	chr7	2938084	2938390	+	12	NA	intron (NM_032415, intron 7 of 24)	intron (NM_032415, intron 7 of 24)	-93929	NM_007353	2768		NM_007353	ENSG00000146535	GNA12	HG1M1|NNX3|RMP|gep	G protein subunit alpha 12	protein-coding
2968	chr1	42035934	42036580	+	12	NA	promoter-TSS (NR_038261)	promoter-TSS (NR_038261)	-323	NR_038261	59269		NM_024503	ENSG00000127124	HIVEP3	KBP-1|KBP1|KRC|SHN3|Schnurri-3|ZAS3|ZNF40C	HIVEP zinc finger 3	protein-coding
3056-2	chr3	9172621	9173289	+	12	NA	intron (NM_014850, intron 1 of 21)	intron (NM_014850, intron 1 of 21)	-19538	NR_121664	101927416		NR_121663	ENSG00000228723	SRGAP3-AS2	-	SRGAP3 antisense RNA 2	ncRNA
3200-3	chr22	30249097	30249824	+	12	NA	Intergenic	Intergenic	-2701	NM_001257135	3976		NM_002309	ENSG00000128342	LIF	CDF|DIA|HILDA|MLPLI	LIF interleukin 6 family cytokine	protein-coding
5219	chr2	179689339	179690420	+	12	NA	intron (NM_001352810, intron 3 of 10)	LTR33|LTR|ERVL	-29685	NM_001352812	151126		NM_152520	ENSG00000144331	ZNF385B	ZNF533	zinc finger protein 385B	protein-coding
3497	chr22	39478189	39478668	+	12	NA	intron (NM_002409, intron 1 of 1)	intron (NM_002409, intron 1 of 1)	-1606	NR_126469	104502417		NR_126469	ENSG00000227188	MGAT3-AS1	TapSAKI	MGAT3 antisense RNA 1	ncRNA
3224-3	chr7	148707960	148708504	+	12	NA	intron (NM_001370664, intron 1 of 21)	intron (NM_001370664, intron 1 of 21)	8522	NM_001370664	8454		NM_003592	ENSG00000055130	CUL1	-	cullin 1	protein-coding
3889	chr22	30890026	30890388	+	12	NA	intron (NR_146603, intron 2 of 2)	MIR|SINE|MIR	8526	NM_001282742	23762		NM_030758	ENSG00000184792	OSBP2	HLM|ORP-4|ORP4|OSBPL1|OSBPL4	oxysterol binding protein 2	protein-coding
2933	chr13	98458154	98458658	+	12	NA	intron (NM_003576, intron 9 of 10)	intron (NM_003576, intron 9 of 10)	63719	NM_003576	8428		NM_003576	ENSG00000102572	STK24	HEL-S-95|MST3|MST3B|STE20|STK3	serine/threonine kinase 24	protein-coding
3058-2	chr12	12725694	12726126	+	12	NA	promoter-TSS (NM_001130415)	promoter-TSS (NM_001130415)	-7	NM_001130415	81575		NM_030817	ENSG00000178878	APOLD1	BDVAS|VERGE	apolipoprotein L domain containing 1	protein-coding
4785	chr10	1003936	1004520	+	12	NA	intron (NM_012341, intron 8 of 16)	L1M2a|LINE|L1	15794	NM_012341	23560		NM_012341	ENSG00000107937	GTPBP4	CRFG|NGB|NOG1	GTP binding protein 4	protein-coding
2127-2	chr20	33651139	33651428	+	12	NA	Intergenic	Intergenic	-11044	NM_080825	128864		NM_080825	ENSG00000149609	C20orf144	dJ63M2.6	chromosome 20 open reading frame 144	protein-coding
2544	chr11	96267663	96267920	+	12	NA	intron (NM_032427, intron 1 of 4)	intron (NM_032427, intron 1 of 4)	-73647	NR_036125	100422991		NR_036125	ENSG00000266192	MIR1260B	mir-1260b	microRNA 1260b	ncRNA
2180-4	chr6	43126788	43126840	+	12	NA	intron (NM_001270398, intron 1 of 19)	intron (NM_001270398, intron 1 of 19)	-44455	NM_003131	6722		NM_003131	ENSG00000112658	SRF	MCM1	serum response factor	protein-coding
1980-7	chr4	37977609	37977983	+	12	NA	intron (NM_015173, intron 2 of 19)	CpG	17398	NM_006607	10744		NM_006607	ENSG00000250254	PTTG2	-	pituitary tumor-transforming 2	protein-coding
3745	chr12	3313585	3314255	+	12	NA	intron (NR_148995, intron 1 of 11)	intron (NR_148995, intron 1 of 11)	52202	NR_148995	100128253		NR_148995		LOC100128253	-	uncharacterized LOC100128253	ncRNA
3715	chr19	28945151	28945803	+	12	NA	Intergenic	Intergenic	-19654	NR_027318	148145		NR_027318	ENSG00000267339	LINC00906	-	long intergenic non-protein coding RNA 906	ncRNA
7613	chr3	14334357	14335390	+	12	NA	Intergenic	Intergenic	17695	NR_110135	101927565		NR_110135	ENSG00000251576	LINC01267	-	long intergenic non-protein coding RNA 1267	ncRNA
4425	chr11	2423532	2424129	+	12	NA	promoter-TSS (NM_014555)	promoter-TSS (NM_014555)	-785	NM_014555	29850		NM_014555	ENSG00000070985	TRPM5	LTRPC5|MTR1	transient receptor potential cation channel subfamily M member 5	protein-coding
2526-3	chr20	33521393	33521936	+	12	NA	intron (NM_001032999, intron 1 of 10)	intron (NM_001032999, intron 1 of 10)	31568	NM_001032999	9139		NM_005093	ENSG00000078699	CBFA2T2	EHT|MTGR1|ZMYND3|p85	CBFA2/RUNX1 partner transcriptional co-repressor 2	protein-coding
2478-3	chr11	111308109	111308593	+	12	NA	exon (NM_001136105, exon 5 of 5)	exon (NM_001136105, exon 5 of 5)	-3303	NR_169237	399948		NM_207429	ENSG00000196167	COLCA1	C11orf92|CASC12|LOH11CR1F	colorectal cancer associated 1	ncRNA
3880	chr15	75184033	75184820	+	12	NA	Intergenic	Intergenic	-17456	NM_015492	56905		NM_015492	ENSG00000167173	C15orf39	-	chromosome 15 open reading frame 39	protein-coding
3811-2	chr12	124413979	124414330	+	12	NA	intron (NM_001077261, intron 15 of 47)	intron (NM_001077261, intron 15 of 47)	-76912	NR_106940	102466204		NR_106940	ENSG00000275967	MIR6880	hsa-mir-6880	microRNA 6880	ncRNA
4439	chr10	84613359	84613899	+	12	NA	Intergenic	Intergenic	188460	NM_001284242	54462		NM_018999	ENSG00000107771	CCSER2	FAM190B|Gcap14|KIAA1128|bA486O22.1	coiled-coil serine rich protein 2	protein-coding
2884	chr16	70692651	70693114	+	12	NA	exon (NM_018052, exon 18 of 19)	exon (NM_018052, exon 18 of 19)	-6829	NM_138383	92154		NM_138383	ENSG00000132613	MTSS2	ABBA|ABBA-1|ABBA1|IDDOF|MTSS1L	MTSS I-BAR domain containing 2	protein-coding
2789	chr1	204465868	204466815	+	12	NA	intron (NM_001377335, intron 4 of 35)	intron (NM_001377335, intron 4 of 35)	28464	NM_001377335	5287		NM_002646	ENSG00000133056	PIK3C2B	C2-PI3K	phosphatidylinositol-4-phosphate 3-kinase catalytic subunit type 2 beta	protein-coding
3158	chr11	78020151	78020553	+	12	NA	intron (NM_001203261, intron 2 of 2)	intron (NM_001203261, intron 2 of 2)	2924	NM_023930	65987		NM_023930	ENSG00000151364	KCTD14	-	potassium channel tetramerization domain containing 14	protein-coding
2082-5	chr15_KI270849v1_alt	38785	39049	+	12	NA	exon (NM_004048, exon 2 of 4).2	exon (NM_004048, exon 2 of 4).2	-2275	NR_162102	113218500		NR_162102		MIR10393	-	microRNA 10393	ncRNA
2446-5	chr5	150674053	150674467	+	12	NA	intron (NM_133371, intron 6 of 6)	intron (NM_133371, intron 6 of 6)	13009	NM_001122853	91977		NM_133371	ENSG00000164591	MYOZ3	CS-3|CS3|FATZ-3|FRP3	myozenin 3	protein-coding
2682	chr11	15327652	15328242	+	12	NA	Intergenic	Intergenic	178845	NM_001278315	387755		NM_001031853	ENSG00000188487	INSC	-	INSC spindle orientation adaptor protein	protein-coding
3220-3	chr3	171950576	171951108	+	12	NA	Intergenic	Intergenic	-50102	NR_046852	100874219		NR_046852		TMEM212-AS1	-	TMEM212 antisense RNA 1	ncRNA
5546	chr11	67620065	67620367	+	12	NA	Intergenic	LTR12C|LTR|ERV1	-4552	NR_033791	390213		NR_033791		DOC2GP	-	double C2 domain gamma, pseudogene	pseudo
5544-2	chr9	133142439	133143338	+	12	NA	intron (NM_001042368, intron 1 of 17)	intron (NM_001042368, intron 1 of 17)	6322	NM_001042368	5900		NM_006266	ENSG00000160271	RALGDS	RGDS|RGF|RalGEF	ral guanine nucleotide dissociation stimulator	protein-coding
2652	chr1	219220969	219221213	+	12	NA	Intergenic	HERVL40-int|LTR|ERVL	46122	NM_001300772	127018		NM_138794	ENSG00000143353	LYPLAL1	Q96AV0	lysophospholipase like 1	protein-coding
3208-3	chr3	32309443	32309948	+	12	NA	intron (NM_001320308, intron 1 of 2)	intron (NM_001320308, intron 1 of 2)	71015	NM_178868	152189		NM_178868	ENSG00000170293	CMTM8	CKLFSF8|CKLFSF8-V2	CKLF like MARVEL transmembrane domain containing 8	protein-coding
4033	chr19	6064195	6064758	+	12	NA	intron (NM_000635, intron 1 of 17)	intron (NM_000635, intron 1 of 17)	46024	NM_000635	5990		NM_000635	ENSG00000087903	RFX2	-	regulatory factor X2	protein-coding
4071-2	chr7	47491452	47492447	+	12	NA	intron (NM_022748, intron 3 of 30)	intron (NM_022748, intron 3 of 30)	-27146	NR_145813	109623468		NR_145813		SNORD151	-	small nucleolar RNA, C/D box 151	snoRNA
2958-2	chr15_KI270905v1_alt	2428490	2429143	+	12	NA	TTS (NR_024074).5	TTS (NR_024074).5	8547	NM_001355469	653075		NM_001355469	ENSG00000261247	GOLGA8T	-	golgin A8 family member T	protein-coding
1779-9	chr4	154626672	154627156	+	12	NA	Intergenic	CpG	-14106	NM_000509	2266		NM_000509	ENSG00000171557	FGG	-	fibrinogen gamma chain	protein-coding
3038-4	chr5	443922	443943	+	12	NA	promoter-TSS (NR_126522)	promoter-TSS (NR_126522)	756	NM_007277	11336		NM_007277	ENSG00000180104	EXOC3	SEC6|SEC6L1|Sec6p	exocyst complex component 3	protein-coding
2935-2	chr2	6917065	6917325	+	12	NA	promoter-TSS (NM_001349181)	promoter-TSS (NM_001349181)	-217	NM_001349186	9781		NM_014746	ENSG00000151692	RNF144A	RNF144|UBCE7IP4|UIP4|hUIP4	ring finger protein 144A	protein-coding
4468	chr6	34244251	34245053	+	12	NA	intron (NM_145899, intron 5 of 5)	intron (NM_145899, intron 5 of 5)	3979	NR_106893	102465502		NR_106893	ENSG00000276404	MIR6835	hsa-mir-6835	microRNA 6835	ncRNA
2383-4	chr18	24076257	24076503	+	12	NA	intron (NM_001135993, intron 4 of 13)	intron (NM_001135993, intron 4 of 13)	-36947	NM_001292030	125488		NM_153211	ENSG00000168234	TTC39C	C18orf17|HsT2697	tetratricopeptide repeat domain 39C	protein-coding
3819	chr15	96344677	96344876	+	12	NA	Intergenic	CpG	11011	NM_001145157	7026		NM_021005	ENSG00000185551	NR2F2	ARP-1|ARP1|CHTD4|COUPTF2|COUPTFB|COUPTFII|NF-E3|SRXX5|SVP40|TFCOUP2	nuclear receptor subfamily 2 group F member 2	protein-coding
5954	chr7	29330713	29330850	+	12	NA	intron (NM_001293070, intron 2 of 13)	intron (NM_001293070, intron 2 of 13)	-121811	NR_120522	102724484		NR_120522		CHN2-AS1	-	CHN2 antisense RNA 1	ncRNA
3838-2	chr19	40403688	40404200	+	12	NA	intron (NM_020956, intron 4 of 5)	intron (NM_020956, intron 4 of 5)	9420	NM_020956	57716		NM_020956	ENSG00000105227	PRX	CMT4F	periaxin	protein-coding
2038-2	chr17	35626980	35626989	+	12	NA	intron (NM_001282, intron 7 of 20)	intron (NM_001282, intron 7 of 20)	39662	NM_001282	163		NM_001282	ENSG00000006125	AP2B1	ADTB2|AP105B|AP2-BETA|CLAPB1	adaptor related protein complex 2 subunit beta 1	protein-coding
2766-2	chr7	38198483	38198890	+	12	NA	intron (NM_001363344, intron 2 of 8)	intron (NM_001363344, intron 2 of 8)	20441	NM_001363345	83930		NM_032016	ENSG00000010270	STARD3NL	MENTHO	STARD3 N-terminal like	protein-coding
2711-5	chr9	89358973	89359300	+	12	NA	3' UTR (NM_001354697, exon 17 of 17)	3' UTR (NM_001354697, exon 17 of 17)	40285	NM_001282690	79048		NM_024077	ENSG00000187742	SECISBP2	SBP2|THMA1	SECIS binding protein 2	protein-coding
5848	chr5	124686201	124686743	+	12	NA	intron (NM_001385621, intron 2 of 8)	intron (NM_001385621, intron 2 of 8)	60167	NM_001385620	57507		NM_020747	ENSG00000168916	ZNF608	NY-REN-36	zinc finger protein 608	protein-coding
3714	chr16	88470134	88470970	+	12	NA	intron (NM_153813, intron 1 of 9)	CpG	1634	NR_049821	100847057		NR_049821	ENSG00000263456	MIR5189	mir-5189	microRNA 5189	ncRNA
4464	chr7	75014466	75015308	+	12	NA	intron (NM_001145064, intron 2 of 8)	intron (NM_001145064, intron 2 of 8)	50182	NM_001145064	729438		NM_001145064	ENSG00000274070	CASTOR2	GATSL1|GATSL2	cytosolic arginine sensor for mTORC1 subunit 2	protein-coding
2847-2	chr16	632999	633430	+	12	NA	exon (NM_053284, exon 2 of 2)	exon (NM_053284, exon 2 of 2)	2229	NM_053284	117166		NM_053284	ENSG00000127578	WFIKKN1	C16orf12|RJD2|WFDC20A|WFIKKN	WAP, follistatin/kazal, immunoglobulin, kunitz and netrin domain containing 1	protein-coding
4157-2	chr6	157235461	157236271	+	12	NA	Intergenic	Intergenic	87653	NM_018452	729515		NM_018452	ENSG00000215712	TMEM242	BM033|C6orf35	transmembrane protein 242	protein-coding
2694-2	chr11	19973691	19974098	+	12	NA	intron (NM_145117, intron 10 of 37)	intron (NM_145117, intron 10 of 37)	-48662	NM_001111019	89797		NM_145117	ENSG00000166833	NAV2	HELAD1|POMFIL2|RAINB1|STEERIN2|UNC53H2	neuron navigator 2	protein-coding
3883	chr14	77324875	77325661	+	12	NA	intron (NM_145871, intron 2 of 7)	intron (NM_145871, intron 2 of 7)	729	NM_001363703	2954		NM_001513	ENSG00000100577	GSTZ1	GSTZ1-1|MAAI|MAAID|MAI	glutathione S-transferase zeta 1	protein-coding
5891	chr1	53702112	53703045	+	12	NA	intron (NM_001367484, intron 2 of 10)	intron (NM_001367484, intron 2 of 10)	31626	NM_147193	148979		NM_147193	ENSG00000174332	GLIS1	-	GLIS family zinc finger 1	protein-coding
3685	chr1	44650216	44650911	+	12	NA	intron (NM_001319957, intron 13 of 13)	intron (NM_001319957, intron 13 of 13)	18595	NM_001376489	55182		NM_016501	ENSG00000187147	RNF220	C1orf164|HLD23	ring finger protein 220	protein-coding
3387-2	chr16	49836630	49836923	+	12	NA	intron (NM_001271620, intron 1 of 7)	intron (NM_001271620, intron 1 of 7)	-14038	NM_015069	23090		NM_015069	ENSG00000102935	ZNF423	Ebfaz|JBTS19|NPHP14|OAZ|Roaz|ZFP423|Zfp104|hOAZ	zinc finger protein 423	protein-coding
2876	chr15	75186079	75186464	+	12	NA	Intergenic	Intergenic	-15611	NM_015492	56905		NM_015492	ENSG00000167173	C15orf39	-	chromosome 15 open reading frame 39	protein-coding
4214-2	chr16	57485292	57486273	+	12	NA	intron (NM_001369618, intron 1 of 7)	intron (NM_001369618, intron 1 of 7)	711	NM_001369618	55715		NM_018110	ENSG00000125170	DOK4	IRS-5|IRS5	docking protein 4	protein-coding
2938-2	chr5	80238835	80239231	+	12	NA	intron (NM_001174072, intron 1 of 11)	MIR3|SINE|MIR	17015	NM_001174071	256987		NM_178276	ENSG00000164300	SERINC5	C5orf12|TPO1	serine incorporator 5	protein-coding
5031	chr10	44261371	44261740	+	12	NA	Intergenic	Intergenic	-31195	NR_164139	100130539		NM_001258000	ENSG00000277288	LINC02881	C10orf142	long intergenic non-protein coding RNA 2881	ncRNA
2155-5	chr2	11129736	11130159	+	12	NA	intron (NR_040080, intron 1 of 8)	intron (NR_040080, intron 1 of 8)	2229	NR_040080	285150		NM_182586	ENSG00000145063	FLJ33534	-	Putative uncharacterized protein FLJ33534	ncRNA
3299	chr15	78737751	78738425	+	12	NA	Intergenic	Intergenic	-13949	NR_036495	646938		NR_036495	ENSG00000290424	LOC646938	-	TBC1 domain family member 2B pseudogene	pseudo
1762-5	chr2	226883409	226883728	+	12	NA	intron (NM_001349069, intron 5 of 8)	intron (NM_001349069, intron 5 of 8)	47514	NM_032276	84236		NM_032276	ENSG00000144468	RHBDD1	RHBDL4|RRP4	rhomboid domain containing 1	protein-coding
5803	chr1	1051433	1051713	+	12	NA	exon (NM_001364727, exon 32 of 36)	exon (NM_001364727, exon 32 of 36)	-8161	NR_148960	100288175		NR_148960	ENSG00000291156	LOC100288175	-	uncharacterized LOC100288175	ncRNA
2624-4	chr3	40477039	40477453	+	12	NA	5' UTR (NM_173656, exon 1 of 6)	5' UTR (NM_173656, exon 1 of 6)	124	NM_001145093	285267		NM_173656	ENSG00000177873	ZNF619	-	zinc finger protein 619	protein-coding
2901-3	chr12	3241666	3242080	+	12	NA	intron (NM_006675, intron 3 of 8)	intron (NM_006675, intron 3 of 8)	124249	NR_148995	100128253		NR_148995		LOC100128253	-	uncharacterized LOC100128253	ncRNA
1709-5	chr13	27792485	27792724	+	12	NA	5' UTR (NM_145657, exon 1 of 2)	5' UTR (NM_145657, exon 1 of 2)	121	NM_145657	219409		NM_145657	ENSG00000169840	GSX1	GSH1|Gsh-1	GS homeobox 1	protein-coding
3024	chr2	56183656	56184075	+	12	NA	promoter-TSS (NM_001348516)	promoter-TSS (NM_001348516)	-125	NM_001080433	114800		NM_001080433	ENSG00000055813	CCDC85A	-	coiled-coil domain containing 85A	protein-coding
3669	chr17	3913608	3914932	+	12	NA	intron (NM_002558, intron 1 of 11)	MIRb|SINE|MIR	2195	NM_002558	5023		NM_002558	ENSG00000108405	P2RX1	P2X1	purinergic receptor P2X 1	protein-coding
2864-3	chr2	194616697	194617320	+	12	NA	Intergenic	L1MB8|LINE|L1	-113587	NR_110223	101927431		NR_110223	ENSG00000230173	LINC01790	-	long intergenic non-protein coding RNA 1790	ncRNA
1698-6	chr15	98548234	98548526	+	12	NA	Intergenic	CpG	-34044	NM_182562	283777		NM_182562	ENSG00000293555	FAM169BP	FAM169B	protein FAM169B	pseudo
2073-6	chr3	63966993	63967259	+	12	NA	promoter-TSS (NM_001128149)	promoter-TSS (NM_001128149)	-668	NM_001128149	6314		NM_000333	ENSG00000163635	ATXN7	ADCAII|OPCA3|SCA7|SGF73	ataxin 7	protein-coding
2671-3	chr3	114402514	114402956	+	12	NA	intron (NM_001164343, intron 8 of 11)	intron (NM_001164343, intron 8 of 11)	-19093	NM_001164342	26137		NM_015642	ENSG00000181722	ZBTB20	DPZF|HOF|ODA-8S|PRIMS|ZNF288	zinc finger and BTB domain containing 20	protein-coding
3809	chr1	52352594	52353105	+	12	NA	3' UTR (NM_001330585, exon 25 of 25)	3' UTR (NM_001330585, exon 25 of 25)	13356	NM_032449	200014		NM_032449	ENSG00000154222	CC2D1B	Lgd1	coiled-coil and C2 domain containing 1B	protein-coding
4558	chr17	79803027	79803784	+	12	NA	Intergenic	CpG-11773	-6328	NM_020649	57332		NM_020649	ENSG00000141570	CBX8	PC3|RC1	chromobox 8	protein-coding
1622-9	chr7	133951044	133951276	+	12	NA	intron (NM_021807, intron 14 of 17)	intron (NM_021807, intron 14 of 17)	-126272	NR_120513	101928861		NR_120513		LOC101928861	-	uncharacterized LOC101928861	ncRNA
6576	chr6	168346106	168346986	+	12	NA	Intergenic	Intergenic	-26769	NR_104425	168002		NM_214462	ENSG00000164488	DACT2	C6orf116|DAPPER2|DPR2|bA503C24.7	dishevelled binding antagonist of beta catenin 2	protein-coding
7263	chr17	45009470	45011070	+	12	NA	Intergenic	Intergenic	41362	NM_001288655	79877		NM_024819	ENSG00000172992	DCAKD	-	dephospho-CoA kinase domain containing	protein-coding
2642-4	chr16	52528373	52528662	+	12	NA	intron (NM_001146188, intron 1 of 7)	MIRb|SINE|MIR	18626	NM_001080430	27324		NM_001080430	ENSG00000103460	TOX3	CAGF9|TNRC9	TOX high mobility group box family member 3	protein-coding
3356-2	chr20	50320918	50321584	+	12	NA	promoter-TSS (NR_109950)	promoter-TSS (NR_109950)	91	NR_109950	101927586		NR_109950	ENSG00000233077	LINC01271	-	long intergenic non-protein coding RNA 1271	ncRNA
8511	chr1	9591983	9592752	+	12	NA	intron (NM_001130924, intron 1 of 10)	intron (NM_001130924, intron 1 of 10)	3456	NM_001130924	199953		NM_001010866	ENSG00000188807	TMEM201	Ima1|NET5|SAMP1	transmembrane protein 201	protein-coding
3192-2	chr7	2663558	2664223	+	12	NA	3' UTR (NM_025250, exon 14 of 14)	3' UTR (NM_025250, exon 14 of 14)	-15632	NM_001384742	155185		NM_133463	ENSG00000174945	AMZ1	-	archaelysin family metallopeptidase 1	protein-coding
2646-2	chr13	98462022	98462672	+	12	NA	intron (NM_003576, intron 7 of 10)	intron (NM_003576, intron 7 of 10)	59778	NM_003576	8428		NM_003576	ENSG00000102572	STK24	HEL-S-95|MST3|MST3B|STE20|STK3	serine/threonine kinase 24	protein-coding
3303	chr1	92480200	92480801	+	12	NA	intron (NM_001127216, intron 4 of 6)	CpG-1333	3454	NM_001127215	2672		NM_005263	ENSG00000162676	GFI1	GFI-1|GFI1A|SCN2|ZNF163	growth factor independent 1 transcriptional repressor	protein-coding
2216-5	chr22	24170042	24170229	+	12	NA	intron (NM_012295, intron 33 of 36)	intron (NM_012295, intron 33 of 36)	-11352	NM_019601	56241		NM_019601	ENSG00000099994	SUSD2	BK65A6.2|W5C5	sushi domain containing 2	protein-coding
1501-18	chr8	80240528	80241009	+	12	NA	promoter-TSS (NR_049894)	promoter-TSS (NR_049894)	-621	NR_049894	100847056		NR_049894	ENSG00000265588	MIR5708	-	microRNA 5708	ncRNA
1970-7	chr4	162126824	162127248	+	12	NA	intron (NM_020116, intron 1 of 15)	intron (NM_020116, intron 1 of 15)	36964	NM_020116	56884		NM_020116	ENSG00000168843	FSTL5	-	follistatin like 5	protein-coding
4450	chr6	154995592	154996215	+	12	NA	intron (NM_012454, intron 1 of 26)	CpG	588	NM_012454	26230		NM_012454	ENSG00000146426	TIAM2	STEF|TIAM-2	TIAM Rac1 associated GEF 2	protein-coding
3443-2	chr5	83587073	83587619	+	12	NA	Intergenic	LTR33|LTR|ERVL	-25032	NR_136215	105379054		NR_136215	ENSG00000249835	VCAN-AS1	-	VCAN antisense RNA 1	ncRNA
2944-2	chr3	196569106	196569503	+	12	NA	promoter-TSS (NM_001345917)	promoter-TSS (NM_001345917)	-630	NM_001345909	348793		NM_182627	ENSG00000185798	WDR53	-	WD repeat domain 53	protein-coding
5044	chr18	12253806	12254695	+	12	NA	promoter-TSS (NR_134607)	promoter-TSS (NR_134607)	-111	NM_001279	1149		NM_001279	ENSG00000176194	CIDEA	CIDE-A	cell death inducing DFFA like effector a	protein-coding
4437	chr7	149814375	149815334	+	12	NA	non-coding (NR_163594, exon 70 of 103)	non-coding (NR_163594, exon 70 of 103)	-23521	NM_001099220	643641		NM_001099220	ENSG00000106479	ZNF862	-	zinc finger protein 862	protein-coding
3031-2	chr20	45974071	45974678	+	12	NA	Intergenic	Intergenic	-2171	NM_022095	63925		NM_022095	ENSG00000198026	ZNF335	MCPH10|NIF-1|NIF1|NIF2	zinc finger protein 335	protein-coding
2487-4	chr21	46397624	46398124	+	12	NA	intron (NM_006031, intron 22 of 46)	intron (NM_006031, intron 22 of 46)	-61017	NM_206889	23181		NM_015151	ENSG00000160305	DIP2A	C21orf106|DIP2	disco interacting protein 2 homolog A	protein-coding
3317	chr10	86631938	86632791	+	12	NA	Intergenic	CpG	-22183	NM_033282	94233		NM_033282	ENSG00000122375	OPN4	MOP	opsin 4	protein-coding
2624	chr1	43454517	43455027	+	12	NA	promoter-TSS (NM_031207)	promoter-TSS (NM_031207)	-783	NM_001190880	81888		NM_031207	ENSG00000178922	HYI	HT036	hydroxypyruvate isomerase (putative)	protein-coding
1592-11	chr20	22617087	22617318	+	12	NA	Intergenic	Intergenic	-9685	NR_109883	101929685		NR_109883	ENSG00000237396	LNCNEF	LINC01384|lncRNA-NEF	lncRNA neighboring enhancer of FOXA2	ncRNA
1942	chr11	86570015	86570383	+	12	NA	intron (NR_147828, intron 2 of 14)	intron (NR_147828, intron 2 of 14)	101999	NR_147831	10873		NM_006680	ENSG00000151376	ME3	NADP-ME	malic enzyme 3	protein-coding
3599	chr7	138476847	138476856	+	12	NA	intron (NM_015905, intron 1 of 18)	L1MC5a|LINE|L1	16592	NM_003852	8805		NM_003852	ENSG00000122779	TRIM24	PTC6|RNF82|TF1A|TIF1|TIF1A|TIF1ALPHA|hTIF1	tripartite motif containing 24	protein-coding
3136-2	chr5	180786968	180787500	+	12	NA	3' UTR (NM_002406, exon 2 of 2)	3' UTR (NM_002406, exon 2 of 2)	15572	NM_001364393	4245		NM_002406	ENSG00000131446	MGAT1	GLCNAC-TI|GLCT1|GLYT1|GNT-1|GNT-I|GnTI|MGAT	alpha-1,3-mannosyl-glycoprotein 2-beta-N-acetylglucosaminyltransferase	protein-coding
1998-4	chr11	31442152	31442368	+	12	NA	intron (NM_001304274, intron 4 of 5)	intron (NM_001304274, intron 4 of 5)	67362	NM_001304274	196294		NM_144981	ENSG00000148950	IMMP1L	IMMP1|IMP1|IMP1-LIKE	inner mitochondrial membrane peptidase subunit 1	protein-coding
2958	chr1	23403738	23404210	+	12	NA	intron (NM_003196, intron 5 of 10).2	MamRTE1|LINE|RTE-BovB	20774	NM_003196	6920		NM_003196	ENSG00000204219	TCEA3	TFIIS|TFIIS.H	transcription elongation factor A3	protein-coding
1976-6	chr22	19967758	19968274	+	12	NA	intron (NM_007310, intron 3 of 3)	intron (NM_007310, intron 3 of 3)	4263	NR_039918	100616414		NR_039918	ENSG00000284031	MIR4761	-	microRNA 4761	ncRNA
6274	chr16	67548002	67549272	+	12	NA	Intergenic	Intergenic	11175	NM_001193524	79567		NM_024519	ENSG00000039523	RIPOR1	FAM65A	RHO family interacting cell polarization regulator 1	protein-coding
2934-3	chr7	140175788	140176241	+	12	NA	intron (NM_030647, intron 1 of 19)	CpG	969	NM_030647	80853		NM_030647	ENSG00000006459	KDM7A	JHDM1D	lysine demethylase 7A	protein-coding
3094-2	chr13	44198883	44199449	+	12	NA	Intergenic	Intergenic	-2966	NR_107046	102465876		NR_107046	ENSG00000276319	MIR8079	hsa-mir-8079	microRNA 8079	ncRNA
3134-2	chr17	79738274	79739417	+	12	NA	intron (NM_178543, intron 5 of 5)	L2a|LINE|L2	7902	NM_178543	339221		NM_178543	ENSG00000182156	ENPP7	ALK-SMase|E-NPP 7|NPP-7|NPP7	ectonucleotide pyrophosphatase/phosphodiesterase 7	protein-coding
2713-2	chr17	79171018	79171472	+	12	NA	intron (NM_001350453, intron 3 of 13)	MER33|DNA|hAT-Charlie	96421	NM_001042573	64772		NM_022759	ENSG00000167280	ENGASE	-	endo-beta-N-acetylglucosaminidase	protein-coding
3892-2	chr6	40912209	40913091	+	12	NA	intron (NR_110873, intron 1 of 5)	LTR67B|LTR|ERVL	110630	NR_110873	101929555		NR_110873		LOC101929555	-	uncharacterized LOC101929555	ncRNA
1758-12	chr5	181217621	181217929	+	12	NA	Intergenic	Intergenic	4858	NR_039781	100616342		NR_039781	ENSG00000264732	MIR4638	mir-4638	microRNA 4638	ncRNA
2168-3	chr3	38346461	38346860	+	12	NA	promoter-TSS (NM_001349179)	promoter-TSS (NM_001349179)	-100	NM_001349179	9942		NM_005108	ENSG00000093217	XYLB	-	xylulokinase	protein-coding
2873	chr1	115828176	115828738	+	12	NA	Intergenic	CpG	12246	NM_001111061	4808		NM_005599	ENSG00000177551	NHLH2	HEN2|HH27|NSCL2|bHLHa34	nescient helix-loop-helix 2	protein-coding
2823-5	chr5	173294105	173294676	+	12	NA	Intergenic	MIR|SINE|MIR	-9340	NR_162132	113219469		NR_162132		MIR12118	-	microRNA 12118	ncRNA
3220-4	chr8	93979642	93980147	+	12	NA	Intergenic	Intergenic	62947	NM_001161779	54704		NM_018444	ENSG00000164951	PDP1	PDH|PDP|PDPC|PDPC 1|PPM2A|PPM2C	pyruvate dehydrogenase phosphatase catalytic subunit 1	protein-coding
3906	chr11	84437298	84438020	+	12	NA	5' UTR (NM_001377973, exon 1 of 22)	5' UTR (NM_001377973, exon 1 of 22)	147	NM_001377973	1740		NM_001364	ENSG00000150672	DLG2	PPP1R58|PSD-93|PSD93|chapsyn-110	discs large MAGUK scaffold protein 2	protein-coding
3421-3	chr6	148747660	148748208	+	12	NA	intron (NM_005715, intron 1 of 7)	CpG	904	NM_005715	10090		NM_005715	ENSG00000111962	UST	2OST	uronyl 2-sulfotransferase	protein-coding
5754	chr5	173720332	173721367	+	12	NA	intron (NR_108027, intron 1 of 2)	intron (NR_108027, intron 1 of 2)	25360	NR_108027	101928136		NR_108027	ENSG00000253686	LINC01484	-	long intergenic non-protein coding RNA 1484	ncRNA
4492-2	chr11	12220219	12220981	+	12	NA	intron (NR_144415, intron 8 of 26)	intron (NR_144415, intron 8 of 26)	56917	NR_106739	102466906		NR_106739	ENSG00000275373	MIR6124	hsa-mir-6124	microRNA 6124	ncRNA
3575-2	chr14	51447334	51447721	+	12	NA	Intergenic	Intergenic	-41601	NM_001042481	122786		NM_152330	ENSG00000139926	FRMD6	C14orf31|EX1|Willin|c14_5320	FERM domain containing 6	protein-coding
2501-3	chr21	42724453	42724833	+	12	NA	intron (NM_001001584, intron 3 of 17)	intron (NM_001001584, intron 3 of 17)	55351	NR_135517	101928311		NR_135517	ENSG00000283051	LINC01668	-	long intergenic non-protein coding RNA 1668	ncRNA
2470	chr12	57135666	57135973	+	12	NA	intron (NM_002332, intron 1 of 88)	intron (NM_002332, intron 1 of 88)	7336	NM_002332	4035		NM_002332	ENSG00000123384	LRP1	A2MR|APOER|APR|CD91|DDH3|IGFBP-3R|IGFBP3R|IGFBP3R1|KPA|LRP|LRP1A|TGFBR5	LDL receptor related protein 1	protein-coding
5054	chr11	46367590	46368853	+	12	NA	intron (NM_001199266, intron 4 of 30)	MIR|SINE|MIR	6615	NM_001105540	8525		NM_003646	ENSG00000149091	DGKZ	DAGK5|DAGK6|DGK-ZETA|hDGKzeta	diacylglycerol kinase zeta	protein-coding
10157	chr6	113856635	113856690	+	12	NA	promoter-TSS (NM_002356)	promoter-TSS (NM_002356)	-683	NM_002356	4082		NM_002356	ENSG00000277443	MARCKS	80K-L|MACS|PKCSL|PRKCSL	myristoylated alanine rich protein kinase C substrate	protein-coding
3040	chr10	46247821	46248533	+	12	NA	intron (NR_103828, intron 2 of 2)	intron (NR_103828, intron 2 of 2)	21431	NR_103828	100996567		NR_103827		ANTXRLP1	-	ANTXR like pseudogene 1	pseudo
3068	chr17	41752994	41753019	+	12	NA	Intergenic	AluSx|SINE|Alu	-18360	NM_001079871	9001		NM_003949	ENSG00000173805	HAP1	HAP2|HIP5|HLP|hHLP1	huntingtin associated protein 1	protein-coding
4793	chr12	123250681	123251625	+	12	NA	intron (NM_001194995, intron 1 of 2)	L1PBa1|LINE|L1	17101	NM_001270434	8099		NM_004642	ENSG00000111328	CDK2AP1	DOC1|DORC1|ST19|doc-1|p12DOC-1	cyclin dependent kinase 2 associated protein 1	protein-coding
5508	chr17_JH159146v1_alt	221324	222130	+	12	NA	Intergenic	(CTG)n|Simple_repeat|Simple_repeat	-6350	NM_033184	85294		NM_033184	ENSG00000213417	KRTAP2-4	KAP2.1B|KAP2.3|KAP2.4|KRTAP2-3|KRTAP2.3|KRTAP2.4	keratin associated protein 2-4	protein-coding
4567	chr16	70398464	70398968	+	12	NA	5' UTR (NM_006927, exon 2 of 7)	5' UTR (NM_006927, exon 2 of 7)	40384	NM_006927	6483		NM_006927	ENSG00000157350	ST3GAL2	Gal-NAc6S|SIAT4B|ST3GALII|ST3GalA.2	ST3 beta-galactoside alpha-2,3-sialyltransferase 2	protein-coding
3105-2	chr8	100861638	100862213	+	12	NA	Intergenic	Intergenic	88646	NM_001135702	7534		NM_003406	ENSG00000164924	YWHAZ	14-3-3-zeta|HEL-S-3|HEL-S-93|HEL4|KCIP-1|POPCHAS|YWHAD	tyrosine 3-monooxygenase/tryptophan 5-monooxygenase activation protein zeta	protein-coding
3392	chr1	3681254	3681583	+	12	NA	intron (NM_001204185, intron 1 of 12)	intron (NM_001204185, intron 1 of 12)	-9254	NM_001204189	7161		NM_005427	ENSG00000078900	TP73	CILD47|P73	tumor protein p73	protein-coding
2307-4	chr3	75622705	75623141	+	12	NA	Intergenic	Intergenic	-7840	NR_031714	100302212		NR_031714	ENSG00000283894	MIR1324	MIRN1324|hsa-mir-1324	microRNA 1324	ncRNA
3806	chr2	127081116	127082048	+	12	NA	intron (NM_139345, intron 1 of 15)	intron (NM_139345, intron 1 of 15)	483	NM_001320634	274		NM_004305	ENSG00000136717	BIN1	AMPH2|AMPHL|CNM2|SH3P9	bridging integrator 1	protein-coding
5764-2	chr21	43802977	43803380	+	12	NA	intron (NM_003683, intron 12 of 12)	intron (NM_003683, intron 12 of 12)	9389	NR_026961	284837		NM_194310	ENSG00000215458	AATBC	-	apoptosis associated transcript in bladder cancer	ncRNA
3308	chr1	39514313	39514822	+	12	NA	promoter-TSS (NR_132962)	promoter-TSS (NR_132962)	-299	NR_132962	192217		NR_132962	ENSG00000237624	OXCT2P1	OXCT2P	3-oxoacid CoA-transferase 2 pseudogene 1	pseudo
6916	chr11	61739994	61740954	+	12	NA	exon (NM_006133, exon 18 of 20)	exon (NM_006133, exon 18 of 20)	-12162	NM_001127392	745		NM_013279	ENSG00000124920	MYRF	11orf9|C11orf9|CUGS|MMERV|MRF|Ndt80|pqn-47	myelin regulatory factor	protein-coding
3316	chr15	84579115	84579621	+	12	NA	non-coding (NR_038274, exon 4 of 4)	non-coding (NR_038274, exon 4 of 4)	8234	NR_038273	100506874		NR_038273		LINC00933	-	long intergenic non-protein coding RNA 933	ncRNA
3424-2	chr8	9419265	9419722	+	12	NA	Intergenic	Intergenic	94442	NR_040039	157273		NR_040039	ENSG00000248538	LOC157273	-	uncharacterized LOC157273	ncRNA
2575-4	chrX	118499421	118499822	+	12	NA	intron (NM_144658, intron 1 of 52)	intron (NM_144658, intron 1 of 52)	3712	NM_144658	139818		NM_144658	ENSG00000147251	DOCK11	ACG|ADMIDX|ZIZ2|bB128O4.1	dedicator of cytokinesis 11	protein-coding
3542	chr17	44568281	44568767	+	12	NA	Intergenic	LTR12C|LTR|ERV1	11040	NM_001466	2535		NM_001466	ENSG00000180340	FZD2	Fz2|OMOD2|fz-2|fzE2|hFz2	frizzled class receptor 2	protein-coding
3326	chr1	9724696	9725324	+	12	NA	intron (NM_001350234, intron 23 of 23)	intron (NM_001350234, intron 23 of 23)	33543	NM_001350235	5293		NM_005026	ENSG00000171608	PIK3CD	APDS|IMD14|IMD14A|IMD14B|P110DELTA|PI3K|ROCHIS|p110D	phosphatidylinositol-4,5-bisphosphate 3-kinase catalytic subunit delta	protein-coding
2337	chr10	34790963	34791331	+	12	NA	intron (NM_019619, intron 1 of 24)	intron (NM_019619, intron 1 of 24)	24149	NM_001184787	56288		NM_019619	ENSG00000148498	PARD3	ASIP|Baz|PAR3|PAR3alpha|PARD-3|PARD3A|PPP1R118|SE2-5L16|SE2-5LT1|SE2-5T2	par-3 family cell polarity regulator	protein-coding
1662-4	chr11	69285730	69285927	+	12	NA	Intergenic	Intergenic	-8327	NM_001293296	26579		NM_138768	ENSG00000172927	MYEOV	OCIM	myeloma overexpressed	protein-coding
1998-10	chr3	144416912	144417285	+	12	NA	Intergenic	Intergenic	444017	NM_001134470	205428		NM_173552	ENSG00000181744	DIPK2A	C3orf58|DIA1|GoPro49|HASF	divergent protein kinase domain 2A	protein-coding
4041	chr3	13480739	13481403	+	12	NA	intron (NM_001136041, intron 1 of 9)	intron (NM_001136041, intron 1 of 9)	765	NM_001330636	79885		NM_024827	ENSG00000163517	HDAC11	HD11	histone deacetylase 11	protein-coding
4214	chr16	29720931	29721873	+	12	NA	Intergenic	LTR13|LTR|ERVK	24588	NM_175900	283897		NM_175900	ENSG00000185905	C16orf54	SAIL	chromosome 16 open reading frame 54	protein-coding
4230-2	chr5	172382876	172383882	+	12	NA	intron (NM_001308175, intron 4 of 12)	intron (NM_001308175, intron 4 of 12)	71144	NM_001308175	285590		NM_001017995	ENSG00000174705	SH3PXD2B	FAD49|FTHS|HOFI|KIAA1295|TKS4|TSK4	SH3 and PX domains 2B	protein-coding
4735	chr5	149777828	149778392	+	12	NA	intron (NM_001172699, intron 1 of 10)	(CA)n|Simple_repeat|Simple_repeat	6170	NM_001172699	133522		NM_133263	ENSG00000155846	PPARGC1B	ERRL1|PERC|PGC-1(beta)|PGC1B	PPARG coactivator 1 beta	protein-coding
3297	chr1	65044514	65044841	+	12	NA	intron (NM_001321853, intron 2 of 26)	intron (NM_001321853, intron 2 of 26)	13165	NR_037443	100500854		NR_037443	ENSG00000265996	MIR3671	-	microRNA 3671	ncRNA
3291-3	chr2	8458281	8458289	+	12	NA	Intergenic	Intergenic	125507	NR_110257	101929567		NR_110257	ENSG00000236008	LINC01814	-	long intergenic non-protein coding RNA 1814	ncRNA
2550	chr14	85444673	85445147	+	12	NA	Intergenic	MLT1I|LTR|ERVL-MaLR	50995	NR_102738	100996280		NR_102737	ENSG00000259107	LINC00911	-	long intergenic non-protein coding RNA 911	ncRNA
3552	chr1	53641854	53642156	+	12	NA	intron (NM_001367484, intron 2 of 10)	intron (NM_001367484, intron 2 of 10)	92199	NM_147193	148979		NM_147193	ENSG00000174332	GLIS1	-	GLIS family zinc finger 1	protein-coding
2341	chr14	75900326	75900723	+	12	NA	intron (NM_015072, intron 30 of 31)	intron (NM_015072, intron 30 of 31)	81471	NM_001329938	7043		NM_003239	ENSG00000119699	TGFB3	ARVD|ARVD1|LDS5|RNHF|TGF-beta3	transforming growth factor beta 3	protein-coding
2331-3	chr1	53099312	53099772	+	12	NA	intron (NM_001287595, intron 5 of 10)	intron (NM_001287595, intron 5 of 10)	37329	NM_001199081	127435		NM_153703	ENSG00000174348	PODN	PCAN|SLRR5A	podocan	protein-coding
3666-5	chr18	27619058	27619688	+	12	NA	Intergenic	Intergenic	-276717	NR_134589	105372038		NR_134589		LOC105372038	-	uncharacterized LOC105372038	ncRNA
3698	chr1	37553863	37554364	+	12	NA	exon (NM_024700, exon 1 of 4)	exon (NM_024700, exon 1 of 4)	180	NM_024700	79753		NM_024700	ENSG00000163877	SNIP1	NEDHCS|PML1|PMRED	Smad nuclear interacting protein 1	protein-coding
3663-2	chr3	183178978	183179407	+	12	NA	3' UTR (NM_015078, exon 30 of 30)	3' UTR (NM_015078, exon 30 of 30)	-16458	NM_014398	27074		NM_014398	ENSG00000078081	LAMP3	CD208|DC LAMP|DC-LAMP|DCLAMP|LAMP|LAMP-3|TSC403	lysosomal associated membrane protein 3	protein-coding
5195	chr16	11836183	11836594	+	12	NA	3' UTR (NM_015659, exon 9 of 9)	3' UTR (NM_015659, exon 9 of 9)	-7556	NR_131217	400500		NR_024049	ENSG00000262117	BCAR4	-	breast cancer anti-estrogen resistance 4	ncRNA
1655	chr1	33008509	33008821	+	12	NA	non-coding (NR_134976, exon 6 of 6)	non-coding (NR_134976, exon 6 of 6)	28218	NM_001625	204		NM_001625	ENSG00000004455	AK2	ADK2	adenylate kinase 2	protein-coding
7613-2	chr3	14335651	14336434	+	12	NA	Intergenic	MIRb|SINE|MIR	16526	NR_110135	101927565		NR_110135	ENSG00000251576	LINC01267	-	long intergenic non-protein coding RNA 1267	ncRNA
4443	chr1	1074996	1075796	+	12	NA	Intergenic	Intergenic	-1090	NM_001205252	401934		NM_001205252	ENSG00000237330	RNF223	-	ring finger protein 223	protein-coding
3549	chr11	118076684	118077332	+	12	NA	promoter-TSS (NM_001173551)	promoter-TSS (NM_001173551)	-4	NM_001083947	56649		NM_019894	ENSG00000137648	TMPRSS4	CAP2|CAPH2|MT-SP2|TMPRSS3	transmembrane serine protease 4	protein-coding
2406-3	chr2	41966671	41967115	+	12	NA	Intergenic	Intergenic	-13087	NR_161189	400950		NM_001242815	ENSG00000205086	LINC02898	C2orf91	long intergenic non-protein coding RNA 2898	ncRNA
4447	chr10	102620003	102620873	+	12	NA	TTS (NM_001178133)	TTS (NM_001178133)	-24041	NM_030912	81603		NM_030912	ENSG00000171206	TRIM8	FSGSNEDS|GERP|RNF27	tripartite motif containing 8	protein-coding
2842-4	chr4	145819711	145820194	+	12	NA	intron (NM_178835, intron 8 of 14)	intron (NM_178835, intron 8 of 14)	118871	NM_001306215	152485		NM_178835	ENSG00000151612	ZNF827	-	zinc finger protein 827	protein-coding
2356-4	chr22	37756622	37756844	+	12	NA	intron (NM_138632, intron 5 of 7)	MLT1J|LTR|ERVL-MaLR	10499	NM_138632	11078		NM_007032	ENSG00000100106	TRIOBP	DFNB28|HRIHFB2122|TAP68|TARA|dJ37E16.4	TRIO and F-actin binding protein	protein-coding
2952	chr19	11694670	11695243	+	12	NA	Intergenic	CpG	20958	NR_028594	401898		NM_001013691	ZNF833P	ZNF833	zinc finger protein 833, pseudogene	pseudo
3127-2	chr19	48970602	48971396	+	12	NA	exon (NM_001161587, exon 12 of 15)	exon (NM_001161587, exon 12 of 15)	5690	NM_000146	2512		NM_000146	ENSG00000087086	FTL	FTL1|LFTD|NBIA3	ferritin light chain	protein-coding
2757	chr1	52674911	52675307	+	12	NA	Intergenic	MER45A|DNA|hAT-Tip100	23238	NM_023077	65260		NM_023077	ENSG00000162377	COA7	C1orf163|RESA1|SCAN3|SELRC1	cytochrome c oxidase assembly factor 7	protein-coding
3208-2	chr3	32310076	32310103	+	12	NA	intron (NM_001320308, intron 1 of 2)	intron (NM_001320308, intron 1 of 2)	71409	NM_178868	152189		NM_178868	ENSG00000170293	CMTM8	CKLFSF8|CKLFSF8-V2	CKLF like MARVEL transmembrane domain containing 8	protein-coding
4686	chr21	45501102	45501598	+	12	NA	intron (NM_001379500, intron 32 of 41)	intron (NM_001379500, intron 32 of 41)	23084	NR_106873	102465489		NR_106873	ENSG00000275167	MIR6815	hsa-mir-6815	microRNA 6815	ncRNA
3572	chr13	33205761	33206396	+	12	NA	promoter-TSS (NM_052851)	promoter-TSS (NM_052851)	-28	NM_001243474	90627		NM_052851	ENSG00000133121	STARD13	ARHGAP37|DLC2|GT650|LINC00464	StAR related lipid transfer domain containing 13	protein-coding
4317-2	chr3	50365236	50366028	+	12	NA	non-coding (NR_111913, exon 1 of 3)	non-coding (NR_111913, exon 1 of 3)	269	NR_111913	101928965		NR_111913	ENSG00000271858	LOC101928965	-	uncharacterized LOC101928965	ncRNA
1953-9	chr2	168356965	168357540	+	12	NA	Intergenic	Intergenic	-99020	NM_203463	253782		NM_203463	ENSG00000172292	CERS6	CERS5|LASS6	ceramide synthase 6	protein-coding
2820-3	chr3	25848664	25848672	+	12	NA	Intergenic	MER6A|DNA|TcMar-Tigger	25027	NR_034055	285326		NR_034055	ENSG00000230891	LINC00692	-	long intergenic non-protein coding RNA 692	ncRNA
2967-2	chr2	217795802	217796138	+	12	NA	Intergenic	Intergenic	37763	NR_145792	109623482		NR_145792		SNORA115	-	small nucleolar RNA, H/ACA box 115	snoRNA
6546	chr9	133140549	133141002	+	12	NA	intron (NM_001042368, intron 1 of 17)	intron (NM_001042368, intron 1 of 17)	8435	NM_001042368	5900		NM_006266	ENSG00000160271	RALGDS	RGDS|RGF|RalGEF	ral guanine nucleotide dissociation stimulator	protein-coding
4004	chr13	26695426	26695543	+	12	NA	Intergenic	Intergenic	65302	NM_005288	2835		NM_005288	ENSG00000132975	GPR12	GPCR12|GPCR21|PPP1R84	G protein-coupled receptor 12	protein-coding
3041-2	chr20	25283352	25284012	+	12	NA	intron (NM_002862, intron 13 of 19)	intron (NM_002862, intron 13 of 19)	35597	NM_002862	5834		NM_002862	ENSG00000100994	PYGB	GPBB	glycogen phosphorylase B	protein-coding
7665	chr1	228835120	228835130	+	12	NA	Intergenic	MSTB|LTR|ERVL-MaLR	99646	NM_021205	58480		NM_021205	ENSG00000116574	RHOU	ARHU|CDC42L1|G28K|WRCH1|hG28K	ras homolog family member U	protein-coding
2501-8	chr6	20702137	20702824	+	12	NA	intron (NM_017774, intron 5 of 15)	LTR1A2|LTR|ERV1	168023	NM_017774	54901		NM_017774	ENSG00000145996	CDKAL1	-	CDK5 regulatory subunit associated protein 1 like 1	protein-coding
2696	chr3	10248213	10248571	+	12	NA	promoter-TSS (NM_014760)	promoter-TSS (NM_014760)	-67	NM_014760	9797		NM_014760	ENSG00000157014	TATDN2	-	TatD DNase domain containing 2	protein-coding
4240	chr3	192789147	192789886	+	12	NA	Intergenic	LTR12C|LTR|ERV1	-61975	NM_001377293	2257		NM_004113	ENSG00000114279	FGF12	DEE47|EIEE47|FGF12B|FHF1	fibroblast growth factor 12	protein-coding
2456-4	chr18	49715991	49716498	+	12	NA	Intergenic	L1PA7|LINE|L1	97289	NM_006111	10449		NM_006111	ENSG00000167315	ACAA2	DSAEC	acetyl-CoA acyltransferase 2	protein-coding
2530-2	chr4	2451811	2452240	+	12	NA	intron (NM_001193282, intron 10 of 15)	intron (NM_001193282, intron 10 of 15)	-17081	NM_001185010	6047		NM_002938	ENSG00000063978	RNF4	RES4-26|SLX5|SNURF	ring finger protein 4	protein-coding
4456	chr19	18736776	18737646	+	12	NA	intron (NM_015321, intron 1 of 13)	intron (NM_015321, intron 1 of 13)	53531	NM_015321	23373		NM_015321	ENSG00000105662	CRTC1	MAML2|MECT1|Mam-2|TORC-1|TORC1|WAMTP1	CREB regulated transcription coactivator 1	protein-coding
3313	chr10	87587408	87587842	+	12	NA	Intergenic	MLT1D|LTR|ERVL-MaLR	-72253	NM_004670	9060		NM_004670	ENSG00000198682	PAPSS2	ATPSK2|BCYM4|SK2	3'-phosphoadenosine 5'-phosphosulfate synthase 2	protein-coding
2578-3	chr11	62575152	62575426	+	12	NA	exon (NM_022830, exon 9 of 9)	exon (NM_022830, exon 9 of 9)	-1398	NM_001404	1937		NM_001404	ENSG00000254772	EEF1G	EF1G|GIG35	eukaryotic translation elongation factor 1 gamma	protein-coding
8001	chr8	686844	687705	+	12	NA	intron (NM_207332, intron 3 of 5)	intron (NM_207332, intron 3 of 5)	43950	NR_156467	157697		NM_207332	ENSG00000104714	ERICH1	HSPC319	glutamate rich 1	protein-coding
3451	chr13	93561602	93562248	+	12	NA	intron (NM_005708, intron 2 of 8)	intron (NM_005708, intron 2 of 8)	296548	NR_046536	100873973		NR_046536		GPC6-AS2	-	GPC6 antisense RNA 2	ncRNA
3633	chr16	8884574	8885097	+	12	NA	Intergenic	AluSz|SINE|Alu	-15823	NM_001278260	23589		NM_014316	ENSG00000153048	CARHSP1	CRHSP-24|CRHSP24|CSDC1	calcium regulated heat stable protein 1	protein-coding
2849-5	chr4	52931631	52931973	+	12	NA	intron (NM_152540, intron 5 of 8)	intron (NM_152540, intron 5 of 8)	69485	NM_023940	65997		NM_023940	ENSG00000128045	RASL11B	-	RAS like family 11 member B	protein-coding
3870	chr4	186697995	186698686	+	12	NA	intron (NM_005245, intron 2 of 26)	intron (NM_005245, intron 2 of 26)	25516	NM_005245	2195		NM_005245	ENSG00000083857	FAT1	CDHF7|CDHR8|FAT|ME5|hFat1	FAT atypical cadherin 1	protein-coding
2347-5	chr20	59385348	59385656	+	12	NA	Intergenic	Intergenic	84891	NM_207032	1908		NM_000114	ENSG00000124205	EDN3	ET-3|ET3|HSCR4|PPET3|WS4B	endothelin 3	protein-coding
3501-2	chr15	92714213	92714939	+	12	NA	Intergenic	CpG	-58801	NM_207446	400451		NM_207446	ENSG00000185442	FAM174B	-	family with sequence similarity 174 member B	protein-coding
3196-3	chrX	130339469	130340264	+	12	NA	promoter-TSS (NM_001282195)	promoter-TSS (NM_001282195)	-22	NM_001282197	9016		NM_003951	ENSG00000102078	SLC25A14	BMCP1|UCP5	solute carrier family 25 member 14	protein-coding
2293-2	chr20	10662308	10662828	+	12	NA	intron (NM_000214, intron 3 of 25)	intron (NM_000214, intron 3 of 25)	11431	NM_000214	182		NM_000214	ENSG00000101384	JAG1	AGS|AGS1|AHD|AWS|CD339|CMT2HH|DCHE|HJ1|JAGL1	jagged canonical Notch ligand 1	protein-coding
3582-2	chr9	134260606	134260655	+	12	NA	Intergenic	AluSq2|SINE|Alu	34767	NR_146518	105376310		NR_146518	ENSG00000223729	LINC02247	-	long intergenic non-protein coding RNA 2247	ncRNA
5544	chr9	133142302	133142305	+	12	NA	intron (NM_001042368, intron 1 of 17)	intron (NM_001042368, intron 1 of 17)	6907	NM_001042368	5900		NM_006266	ENSG00000160271	RALGDS	RGDS|RGF|RalGEF	ral guanine nucleotide dissociation stimulator	protein-coding
2690-2	chr1	234820555	234820989	+	12	NA	Intergenic	Intergenic	-60716	NR_148962	100130249		NR_148962	ENSG00000279261	LINC02961	PP2672	long intergenic non-protein coding RNA 2961	ncRNA
2390-4	chr19	13765865	13765998	+	12	NA	intron (NM_032285, intron 2 of 5)	intron (NM_032285, intron 2 of 5)	1409	NM_001031727	84245		NM_032285	ENSG00000037757	MRI1	M1Pi|MRDI|MTNA|Ypr118w	methylthioribose-1-phosphate isomerase 1	protein-coding
5866	chr11	102360911	102361838	+	12	NA	intron (NM_001256166, intron 3 of 8)	intron (NM_001256166, intron 3 of 8)	14000	NM_001256163	329		NM_001166	ENSG00000110330	BIRC2	API1|HIAP2|Hiap-2|MIHB|RNF48|c-IAP1|cIAP1	baculoviral IAP repeat containing 2	protein-coding
3131-3	chr22	19180847	19181351	+	12	NA	intron (NM_001835, intron 29 of 31)	intron (NM_001835, intron 29 of 31)	-2236	NR_046298	6576		NM_005984	ENSG00000100075	SLC25A1	CIC|CMS23|CTP|D2L2AD|SEA|SLC20A3	solute carrier family 25 member 1	protein-coding
3354	chr17	7989802	7990475	+	12	NA	Intergenic	CpG	-12477	NM_000180	3000		NM_000180	ENSG00000132518	GUCY2D	CACD|CACD1|CG-E|CORD5|CORD6|CSNB1I|CYGD|GUC1A4|GUC2D|LCA|LCA1|RCD2|RETGC-1|ROS-GC1|ROSGC|retGC	guanylate cyclase 2D, retinal	protein-coding
2285	chr10	94682651	94683021	+	12	NA	promoter-TSS (NM_001128925)	promoter-TSS (NM_001128925)	-893	NM_000772	1562		NM_000772	ENSG00000108242	CYP2C18	CPCI|CYP2C|CYP2C17|P450-6B/29C|P450IIC17	cytochrome P450 family 2 subfamily C member 18	protein-coding
3733-3	chr19	33410487	33411035	+	12	NA	intron (NM_000285, intron 11 of 14)	intron (NM_000285, intron 11 of 14)	36237	NM_001252296	1054		NM_001806	ENSG00000153879	CEBPG	GPE1BP|IG/EBP-1	CCAAT enhancer binding protein gamma	protein-coding
2932-2	chr16	4200088	4200798	+	12	NA	intron (NM_001323667, intron 4 of 6)	intron (NM_001323667, intron 4 of 6)	41637	NM_001323667	6345		NM_001098814	ENSG00000185739	SRL	SAR	sarcalumenin	protein-coding
3215	chr1	11943777	11943892	+	12	NA	intron (NM_000302, intron 1 of 18)	MIR|SINE|MIR	9117	NM_000302	5351		NM_000302	ENSG00000083444	PLOD1	EDS6|EDSKCL1|LH|LH1|LLH|PLOD	procollagen-lysine,2-oxoglutarate 5-dioxygenase 1	protein-coding
12894	chr1	20725164	20726728	+	12	NA	exon (NM_001103161, exon 5 of 10)	exon (NM_001103161, exon 5 of 10)	6757	NM_001103160	400745		NM_001103160	ENSG00000189410	SH2D5	-	SH2 domain containing 5	protein-coding
2483-5	chr3	130746510	130746979	+	12	NA	promoter-TSS (NM_014602)	promoter-TSS (NM_014602)	85	NM_014602	30849		NM_014602	ENSG00000196455	PIK3R4	VPS15|p150	phosphoinositide-3-kinase regulatory subunit 4	protein-coding
4953	chr6	108557169	108557851	+	12	NA	Intergenic	Intergenic	-2315	NM_201559	2309		NM_001455	ENSG00000118689	FOXO3	AF6q21|FKHRL1|FKHRL1P2|FOXO2|FOXO3A	forkhead box O3	protein-coding
2727-6	chr8	133039848	133040030	+	12	NA	intron (NM_001045556, intron 8 of 8)	intron (NM_001045556, intron 8 of 8)	6642	NR_107002	102466865		NR_107002	ENSG00000276961	MIR7848	hsa-mir-7848	microRNA 7848	ncRNA
1799-6	chr2	96549533	96549828	+	12	NA	intron (NM_212481, intron 3 of 6)	intron (NM_212481, intron 3 of 6)	11801	NM_001319092	10865		NM_006673	ENSG00000196843	ARID5A	MRF-1|MRF1|RP11-363D14	AT-rich interaction domain 5A	protein-coding
4585	chr7	37011651	37011807	+	12	NA	intron (NR_104120, intron 2 of 2)	intron (NR_104120, intron 2 of 2)	13933	NR_104120	100861514		NR_104120	ENSG00000224101	ELMO1-AS1	-	ELMO1 antisense RNA 1	ncRNA
1659-6	chr3	110626046	110626328	+	12	NA	Intergenic	(CA)n|Simple_repeat|Simple_repeat	443772	NR_045114	100506555		NR_045114		NECTIN3-AS1	PVRL3-AS1	NECTIN3 antisense RNA 1	ncRNA
2747	chr1	208207678	208208161	+	12	NA	intron (NM_025179, intron 3 of 31)	intron (NM_025179, intron 3 of 31)	36465	NM_025179	5362		NM_025179	ENSG00000076356	PLXNA2	OCT|PLXN2	plexin A2	protein-coding
4479	chr1	94332985	94333882	+	12	NA	Intergenic	Intergenic	-84944	NM_001122674	5825		NM_002858	ENSG00000117528	ABCD3	ABC43|CBAS5|PMP70|PXMP1|ZWS2	ATP binding cassette subfamily D member 3	protein-coding
2666-3	chr19	45486035	45486221	+	12	NA	intron (NM_005619, intron 9 of 10)	intron (NM_005619, intron 9 of 10)	7125	NM_206901	6253		NM_005619	ENSG00000125744	RTN2	NSP2|NSPL1|NSPLI|SPG12	reticulon 2	protein-coding
1612-4	chr15	34582632	34582883	+	12	NA	intron (NR_027410, intron 1 of 23)	CpG	813	NR_027410	440270		NM_001023567	ENSG00000215252	GOLGA8B	GOLGA5	golgin A8 family member B	protein-coding
8549	chr20	17613991	17616090	+	12	NA	intron (NM_004587, intron 23 of 24)	intron (NM_004587, intron 23 of 24)	44965	NM_006870	11034		NM_006870	ENSG00000125868	DSTN	ACTDP|ADF|HEL32|bA462D18.2	destrin, actin depolymerizing factor	protein-coding
2881	chr17	12600330	12600828	+	12	NA	intron (NR_034145, intron 3 of 3)	intron (NR_034145, intron 3 of 3)	50611	NR_034145	284034		NM_182567	ENSG00000179136	LINC00670	CARDINAL	long intergenic non-protein coding RNA 670	ncRNA
3672-3	chr4	87068575	87069253	+	12	NA	intron (NM_001313959, intron 3 of 19)	intron (NM_001313959, intron 3 of 19)	61913	NM_005935	4299		NM_005935	ENSG00000172493	AFF1	AF4|FEL|MLLT2|PBM1	ALF transcription elongation factor 1	protein-coding
2910-2	chr17	34992583	34992772	+	12	NA	exon (NM_002311, exon 8 of 20)	exon (NM_002311, exon 8 of 20)	12165	NM_013975	3980		NM_002311	ENSG00000005156	LIG3	LIG2|LIG3alpha|MTDPS20	DNA ligase 3	protein-coding
2372-2	chr3	63963612	63963956	+	12	NA	intron (NM_001177387, intron 4 of 12)	L1MC4a|LINE|L1	-4010	NM_001128149	6314		NM_000333	ENSG00000163635	ATXN7	ADCAII|OPCA3|SCA7|SGF73	ataxin 7	protein-coding
2351	chr12	56001579	56001655	+	12	NA	intron (NM_000456, intron 3 of 5)	MIRb|SINE|MIR	4341	NM_001032386	6821		NM_000456	ENSG00000139531	SUOX	-	sulfite oxidase	protein-coding
3993-2	chr11	46678225	46678622	+	12	NA	3' UTR (NM_004308, exon 13 of 13)	3' UTR (NM_004308, exon 13 of 13)	22196	NM_004308	392		NM_004308	ENSG00000175220	ARHGAP1	CDC42GAP|RHOGAP|RHOGAP1|p50rhoGAP	Rho GTPase activating protein 1	protein-coding
6187	chr8	143396744	143397936	+	12	NA	Intergenic	Intergenic	-20339	NR_126358	104326051		NR_126358		MAFA-AS1	TCONS_00014882	MAFA antisense RNA 1	ncRNA
2225-10	chr7	502388	502716	+	12	NA	intron (NM_033023, intron 4 of 5)	intron (NM_033023, intron 4 of 5)	17292	NM_002607	5154		NM_002607	ENSG00000197461	PDGFA	PDGF-A|PDGF1	platelet derived growth factor subunit A	protein-coding
2310-7	chr22	37165800	37166147	+	12	NA	intron (NM_001346222, intron 1 of 9)	intron (NM_001346222, intron 1 of 9)	9083	NM_001346223	3560		NM_000878	ENSG00000100385	IL2RB	CD122|IL15RB|IMD63|P70-75	interleukin 2 receptor subunit beta	protein-coding
4446	chr20	3930264	3931188	+	12	NA	TTS (NR_136715)	TTS (NR_136715)	-13163	NR_031722	100302282		NR_031722	ENSG00000283320	MIR103B2	MIR103-2-AS|MIR103-2AS|MIRN103-2AS|hsa-mir-103-2-as	microRNA 103b-2	ncRNA
5487	chr22	29225432	29226295	+	12	NA	intron (NM_133455, intron 4 of 14)	intron (NM_133455, intron 4 of 14)	19967	NM_001267895	129080		NM_133455	ENSG00000186998	EMID1	EMI5|EMU1	EMI domain containing 1	protein-coding
2763-3	chr19	16517246	16517733	+	12	NA	TTS (NM_006387)	TTS (NM_006387)	21095	NM_001288834	84167		NM_032207	ENSG00000105072	C19orf44	-	chromosome 19 open reading frame 44	protein-coding
3910	chr10	27998259	27998818	+	12	NA	intron (NM_018076, intron 1 of 19)	CpG	359	NM_001290020	55130		NM_018076	ENSG00000169126	ODAD2	ARMC4|CILD23|gudu	outer dynein arm docking complex subunit 2	protein-coding
3902	chr7	29327753	29327816	+	12	NA	intron (NM_001293070, intron 2 of 13)	intron (NM_001293070, intron 2 of 13)	-118814	NR_120522	102724484		NR_120522		CHN2-AS1	-	CHN2 antisense RNA 1	ncRNA
3230-2	chr1	43423353	43424002	+	12	NA	intron (NM_001365999, intron 15 of 71)	intron (NM_001365999, intron 15 of 71)	-24862	NR_106793	102465440		NR_106793	ENSG00000274975	MIR6735	hsa-mir-6735	microRNA 6735	ncRNA
5536	chr15	90191995	90193002	+	12	NA	intron (NM_001324031, intron 1 of 14)	intron (NM_001324031, intron 1 of 14)	577	NM_001324031	10509		NM_020210	ENSG00000185033	SEMA4B	SEMAC|SemC	semaphorin 4B	protein-coding
3307-3	chr19	40802191	40802805	+	12	NA	intron (NM_053046, intron 2 of 5)	Charlie4z|DNA|hAT-Charlie	2976	NM_053046	112398		NM_017555	ENSG00000269858	EGLN2	EIT-6|EIT6|HIF-PH1|HIFPH1|HPH-1|HPH-3|PHD1	egl-9 family hypoxia inducible factor 2	protein-coding
2501-4	chr22	49448825	49449335	+	12	NA	intron (NR_110523, intron 1 of 4)	intron (NR_110523, intron 1 of 4)	94386	NR_037440	100500882		NR_037440	ENSG00000264139	MIR3667	-	microRNA 3667	ncRNA
5016	chr1	53539024	53539634	+	12	NA	intron (NM_147193, intron 3 of 9)	(AC)n|Simple_repeat|Simple_repeat	79930	NM_033067	63948		NM_033067	ENSG00000143006	DMRTB1	-	DMRT like family B with proline rich C-terminal 1	protein-coding
2783	chr1	16022882	16023361	+	12	NA	intron (NM_004070, intron 2 of 19)	intron (NM_004070, intron 2 of 19)	1085	NM_004070	1187		NM_004070	ENSG00000186510	CLCNKA	CLCK1|ClC-K1|hClC-Ka	chloride voltage-gated channel Ka	protein-coding
2534-2	chr1	236844909	236845224	+	12	NA	intron (NM_000254, intron 15 of 32)	intron (NM_000254, intron 15 of 32)	49774	NM_001291940	4548		NM_000254	ENSG00000116984	MTR	HMAG|MS|cblG	5-methyltetrahydrofolate-homocysteine methyltransferase	protein-coding
2805-3	chr2	218962983	218963444	+	12	NA	Intergenic	CpG	3547	NM_003936	8941		NM_003936	ENSG00000171450	CDK5R2	NCK5AI|P39|p39nck5ai	cyclin dependent kinase 5 regulatory subunit 2	protein-coding
2614-4	chr3_KI270936v1_alt	135059	135384	+	12	NA	intron (NR_003265, intron 1 of 14).7	CpG	414	NR_003265	727956		NR_003265	ENSG00000242086	SDHAP2	SDHAL2|SDHALP2	SDHA pseudogene 2	pseudo
2368-3	chr9	131175539	131175833	+	12	NA	intron (NM_001318324, intron 23 of 35)	intron (NM_001318324, intron 23 of 35)	-14453	NM_001318325	8021		NM_005085	ENSG00000126883	NUP214	CAIN|CAN|IIAE9	nucleoporin 214	protein-coding
2047-4	chr15	62344887	62345380	+	12	NA	Intergenic	Intergenic	2104	NR_106733	102464834		NR_106733	ENSG00000275451	MIR6085	hsa-mir-6085	microRNA 6085	ncRNA
2835-2	chr20	51372212	51372725	+	12	NA	Intergenic	Intergenic	80509	NR_036162	100422889		NR_036162	ENSG00000266761	MIR3194	mir-3194	microRNA 3194	ncRNA
3761	chr20	41146728	41147368	+	12	NA	intron (NM_182811, intron 1 of 31)	intron (NM_182811, intron 1 of 31)	-9048	NR_109889	101927117		NR_109889	ENSG00000226648	PLCG1-AS1	TOP1-AS1	PLCG1 antisense RNA 1	ncRNA
2134	chr14	64759922	64760258	+	12	NA	intron (NM_001355436, intron 32 of 35)	intron (NM_001355436, intron 32 of 35)	25596	NR_107009	102465841		NR_107009	ENSG00000284269	MIR7855	hsa-mir-7855	microRNA 7855	ncRNA
3277-2	chr3	52468973	52469579	+	12	NA	intron (NM_001276294, intron 3 of 13)	intron (NM_001276294, intron 3 of 13)	13672	NM_001276294	11188		NM_007184	ENSG00000010322	NISCH	I-1|IR1|IRAS|hIRAS	nischarin	protein-coding
5026	chr3	63090424	63091340	+	12	NA	Intergenic	Intergenic	-11806	NR_027104	285401		NR_027104	ENSG00000244342	LINC00698	-	long intergenic non-protein coding RNA 698	ncRNA
3401	chr1	183218693	183219062	+	12	NA	intron (NM_005562, intron 4 of 22)	intron (NM_005562, intron 4 of 22)	32613	NM_005562	3918		NM_005562	ENSG00000058085	LAMC2	B2T|BM600|CSF|EBR2|EBR2A|JEB3A|JEB3B|LAMB2T|LAMNB2	laminin subunit gamma 2	protein-coding
1746-18	chr7	158029547	158029998	+	12	NA	intron (NM_130842, intron 10 of 21)	intron (NM_130842, intron 10 of 21)	175187	NR_038966	100506585		NR_038966		PTPRN2-AS1	-	PTPRN2 antisense RNA 1	ncRNA
3762	chr1	63920790	63920875	+	12	NA	intron (NM_001083592, intron 1 of 6)	intron (NM_001083592, intron 1 of 6)	146815	NM_001083592	4919		NM_005012	ENSG00000185483	ROR1	NTRKR1|dJ537F10.1	receptor tyrosine kinase like orphan receptor 1	protein-coding
2977	chr1	29311035	29311444	+	12	NA	intron (NM_133177, intron 20 of 30)	intron (NM_133177, intron 20 of 30)	38875	NR_110758	101928460		NR_110758	ENSG00000230523	LINC01756	-	long intergenic non-protein coding RNA 1756	ncRNA
2767-3	chr5	173685442	173685472	+	12	NA	Intergenic	AluY|SINE|Alu	-4002	NR_146727	105377736		NR_146727	ENSG00000253428	LINC01942	-	long intergenic non-protein coding RNA 1942	ncRNA
4204	chr1	175735033	175735515	+	12	NA	intron (NM_001328635, intron 1 of 22)	intron (NM_001328635, intron 1 of 22)	8321	NM_003285	7143		NM_003285	ENSG00000116147	TNR	NEDSTO|TN-R	tenascin R	protein-coding
4391	chr14	105473510	105474560	+	12	NA	promoter-TSS (NM_001270841)	promoter-TSS (NM_001270841)	-786	NM_001270841	1397		NM_001312	ENSG00000182809	CRIP2	CRIP|CRP2|ESP1	cysteine rich protein 2	protein-coding
4088	chr20	63836419	63837027	+	12	NA	Intergenic	Intergenic	-5459	NM_001369741	140685		NM_025224	ENSG00000130584	ZBTB46	BTBD4|BZEL|RINZF|ZNF340|dJ583P15.7|dJ583P15.8	zinc finger and BTB domain containing 46	protein-coding
5764-3	chr21	43804056	43804133	+	12	NA	3' UTR (NM_003683, exon 13 of 13)	3' UTR (NM_003683, exon 13 of 13)	8473	NR_026961	284837		NM_194310	ENSG00000215458	AATBC	-	apoptosis associated transcript in bladder cancer	ncRNA
4173-2	chr12	120388760	120389427	+	12	NA	Intergenic	Intergenic	-19929	NM_002442	4440		NM_002442	ENSG00000135097	MSI1	-	musashi RNA binding protein 1	protein-coding
3329	chr4	11752711	11753331	+	12	NA	intron (NR_146995, intron 1 of 3)	L1MA7|LINE|L1	16447	NR_146995	105374484		NR_146995	ENSG00000248300	LINC02360	-	long intergenic non-protein coding RNA 2360	ncRNA
2926-4	chr22	39087944	39088386	+	12	NA	TTS (NM_021822)	TTS (NM_021822)	-9059	NM_001166004	164668		NM_181773	ENSG00000100298	APOBEC3H	A3H|ARP-10|ARP10	apolipoprotein B mRNA editing enzyme catalytic subunit 3H	protein-coding
2507-2	chr10	94898434	94898918	+	11	NA	Intergenic	L1P1|LINE|L1	-39982	NM_000771	1559		NM_000771	ENSG00000138109	CYP2C9	CPC9|CYP2C|CYP2C10|CYPIIC9|P450-2C9|P450IIC9	cytochrome P450 family 2 subfamily C member 9	protein-coding
3059-4	chr8	42467192	42467878	+	11	NA	intron (NM_001257180, intron 2 of 10)	intron (NM_001257180, intron 2 of 10)	33696	NM_001257180	6575		NM_006749	ENSG00000168575	SLC20A2	GLVR-2|GLVR2|IBGC1|IBGC2|IBGC3|MLVAR|PIT-2|PIT2|RAM1|Ram-1	solute carrier family 20 member 2	protein-coding
2849	chr1	54679592	54679825	+	11	NA	intron (NR_111931, intron 12 of 22)	intron (NR_111931, intron 12 of 22)	-36114	NM_001291333	7268		NM_004623	ENSG00000243725	TTC4	CNS1	tetratricopeptide repeat domain 4	protein-coding
3308-2	chr17	82554386	82554777	+	11	NA	intron (NM_004514, intron 1 of 8)	intron (NM_004514, intron 1 of 8)	34849	NM_004514	3607		NM_004514	ENSG00000141568	FOXK2	ILF|ILF-1|ILF1|nGTBP	forkhead box K2	protein-coding
3375	chr11	12537546	12538118	+	11	NA	Intergenic	L2a|LINE|L2	-136589	NM_021961	7003		NM_021961	ENSG00000187079	TEAD1	AA|NTEF-1|REF1|TCF-13|TCF13|TEAD-1|TEF-1	TEA domain transcription factor 1	protein-coding
4565	chr2	128271653	128272468	+	11	NA	intron (NM_004807, intron 1 of 1)	intron (NM_004807, intron 1 of 1)	46808	NM_004807	9394		NM_004807	ENSG00000136720	HS6ST1	HH15|HS6ST	heparan sulfate 6-O-sulfotransferase 1	protein-coding
3115-5	chr9	27569311	27569873	+	11	NA	intron (NM_145005, intron 1 of 4)	Tigger3|DNA|TcMar-Tigger	3889	NM_018325	203228		NM_018325	ENSG00000147894	C9orf72	ALSFTD|DENND9|DENNL72|FTDALS|FTDALS1	C9orf72-SMCR8 complex subunit	protein-coding
3442-5	chr8	133265866	133266249	+	11	NA	intron (NM_001258432, intron 1 of 13)	intron (NM_001258432, intron 1 of 13)	30633	NM_001374846	10397		NM_006096	ENSG00000104419	NDRG1	CAP43|CMT4D|DRG-1|DRG1|GC4|HMSNL|NDR1|NMSL|PROXY1|RIT42|RTP|TARG1|TDD5	N-myc downstream regulated 1	protein-coding
2543-3	chr12	120710910	120711477	+	11	NA	intron (NM_001080533, intron 1 of 4)	intron (NM_001080533, intron 1 of 4)	735	NM_001080533	84747		NM_032661	ENSG00000175970	UNC119B	POC7B	unc-119 lipid binding chaperone B	protein-coding
2242	chr12	29784192	29784583	+	11	NA	promoter-TSS (NM_001367875)	promoter-TSS (NM_001367875)	372	NM_175861	83857		NM_031920	ENSG00000133687	TMTC1	ARG99|OLF|TMTC1A	transmembrane O-mannosyltransferase targeting cadherins 1	protein-coding
4209	chr1	21268266	21269147	+	11	NA	intron (NM_001397, intron 4 of 18)	intron (NM_001397, intron 4 of 18)	10909	NM_001113347	1889		NM_001397	ENSG00000117298	ECE1	ECE	endothelin converting enzyme 1	protein-coding
3144-2	chr17	4878376	4879236	+	11	NA	intron (NM_015716, intron 2 of 30)	intron (NM_015716, intron 2 of 30)	-20730	NM_001145536	100130311		NM_001145536	ENSG00000205710	C17orf107	-	chromosome 17 open reading frame 107	protein-coding
1720-5	chr2	196954096	196954357	+	11	NA	Intergenic	LTR9D|LTR|ERV1	-27519	NM_001321100	80055		NM_024989	ENSG00000197121	PGAP1	Bst1|ISPD3024|MRT42|NEDDSBA|SPG67	post-GPI attachment to proteins inositol deacylase 1	protein-coding
1690-13	chr7	7812158	7812476	+	11	NA	intron (NM_001302350, intron 4 of 4)	intron (NM_001302350, intron 4 of 4)	-93710	NM_002947	6119		NM_002947	ENSG00000106399	RPA3	REPA3|RP-A p14	replication protein A3	protein-coding
2023-7	chr8	11850859	11851246	+	11	NA	intron (NM_001384728, intron 4 of 10)	intron (NM_001384728, intron 4 of 10)	17035	NM_147783	1508		NM_001908	ENSG00000164733	CTSB	APPS|CPSB|KWE|RECEUP	cathepsin B	protein-coding
3188-3	chr3	71930371	71931086	+	11	NA	Intergenic	Intergenic	-145580	NM_021935	60675		NM_021935	ENSG00000163421	PROK2	BV8|HH4|KAL4|MIT1|PK2	prokineticin 2	protein-coding
1839-7	chr19	13979171	13979400	+	11	NA	intron (NM_002918, intron 7 of 20)	intron (NM_002918, intron 7 of 20)	-25893	NM_001146254	79883		NM_024825	ENSG00000132000	PODNL1	SLRR5B	podocan like 1	protein-coding
4396-2	chr7	2522895	2523887	+	11	NA	intron (NM_001040168, intron 1 of 7)	intron (NM_001040168, intron 1 of 7)	3617	NM_001040168	3955		NM_002304	ENSG00000106003	LFNG	SCDO3	LFNG O-fucosylpeptide 3-beta-N-acetylglucosaminyltransferase	protein-coding
1950-3	chr11	2852762	2853038	+	11	NA	intron (NR_130721, intron 2 of 2)	intron (NR_130721, intron 2 of 2)	8669	NR_130721	338653		NR_130721	ENSG00000229414	KCNQ1-AS1	-	KCNQ1 antisense RNA 1	ncRNA
1592-5	chr14	100868067	100868333	+	11	NA	promoter-TSS (NR_030172)	promoter-TSS (NR_030172)	-860	NR_030172	574450		NR_030172	ENSG00000207989	MIR493	MIRN493|hsa-mir-493|mir-493	microRNA 493	ncRNA
3122-4	chr3	12909861	12909864	+	11	NA	intron (NM_014869, intron 10 of 13)	intron (NM_014869, intron 10 of 13)	-24651	NR_136189	105376955		NR_136189	ENSG00000232746	LINC02022	-	long intergenic non-protein coding RNA 2022	ncRNA
1619-15	chr7	125468534	125468722	+	11	NA	Intergenic	MER52A|LTR|ERV1	-204337	NR_110183	101928254		NR_110182	ENSG00000219445	LOC101928254	-	uncharacterized LOC101928254	ncRNA
2478	chr1	16076370	16076710	+	11	NA	Intergenic	MIR3|SINE|MIR	-2889	NM_182623	348487		NM_182623	ENSG00000185519	FAM131C	C1orf117	family with sequence similarity 131 member C	protein-coding
3680	chr22	38153872	38154338	+	11	NA	intron (NM_001349869, intron 2 of 16)	L1M1|LINE|L1	27725	NM_001349868	8398		NM_003560	ENSG00000184381	PLA2G6	CaI-PLA2|GVI|INAD1|IPLA2-VIA|NBIA2|NBIA2A|NBIA2B|PARK14|PLA2|PNPLA9|iPLA2|iPLA2beta	phospholipase A2 group VI	protein-coding
3484-3	chr3	50134459	50134608	+	11	NA	intron (NR_135301, intron 2 of 3)	intron (NR_135301, intron 2 of 3)	-20525	NM_001318798	6405		NM_004186	ENSG00000001617	SEMA3F	SEMA-IV|SEMA4|SEMAK	semaphorin 3F	protein-coding
3759	chr12	117041931	117042771	+	11	NA	intron (NR_031766, intron 6 of 7)	intron (NR_031766, intron 6 of 7)	-55014	NR_103809	100506551		NR_103809	ENSG00000257279	LOC100506551	-	uncharacterized LOC100506551	ncRNA
2093-5	chr22	24968280	24968660	+	11	NA	Intergenic	Intergenic	-21775	NM_001001663	255349		NM_001001663	ENSG00000206069	LHFPL7	TMEM211|bA9F11.1	LHFPL tetraspan subfamily member 7	protein-coding
2280-3	chr19	12665871	12665885	+	11	NA	promoter-TSS (NM_001099737)	promoter-TSS (NM_001099737)	864	NM_000528	4125		NM_000528	ENSG00000104774	MAN2B1	LAMAN|MANB	mannosidase alpha class 2B member 1	protein-coding
4235	chr1	7683744	7684549	+	11	NA	intron (NM_001349613, intron 1 of 11)	intron (NM_001349613, intron 1 of 11)	4058	NM_001349613	23261		NM_015215	ENSG00000171735	CAMTA1	CANPMR|CECBA	calmodulin binding transcription activator 1	protein-coding
2528-2	chr11	116696328	116696692	+	11	NA	Intergenic	Intergenic	57088	NR_135069	101929011		NR_135069	ENSG00000237937	LINC02702	LASER	long intergenic non-protein coding RNA 2702	ncRNA
3045	chr16	634460	634957	+	11	NA	TTS (NM_053284)	TTS (NM_053284)	1597	NM_001040160	84326		NM_032366	ENSG00000130731	METTL26	C16orf13|JFP2	methyltransferase like 26	protein-coding
1669-12	chr19	50399329	50399656	+	11	NA	intron (NR_046402, intron 3 of 25)	intron (NR_046402, intron 3 of 25)	640	NM_001308632	5424		NM_002691	ENSG00000062822	POLD1	CDC2|CRCS10|MDPL|POLD	DNA polymerase delta 1, catalytic subunit	protein-coding
2947-2	chr21	15729506	15730155	+	11	NA	promoter-TSS (NM_013396)	promoter-TSS (NM_013396)	-104	NM_001283041	29761		NM_013396	ENSG00000155313	USP25	USP21	ubiquitin specific peptidase 25	protein-coding
5935	chr17	50627532	50628696	+	11	NA	TTS (NM_001256330)	TTS (NM_001256330)	-6767	NM_003786	8714		NM_003786	ENSG00000108846	ABCC3	ABC31|EST90757|MLP2|MOAT-D|MRP3|cMOAT2	ATP binding cassette subfamily C member 3	protein-coding
1701-8	chr4	21407475	21407684	+	11	NA	intron (NM_147182, intron 2 of 8)	MIR|SINE|MIR	57179	NR_107018	102465859		NR_107018	ENSG00000283281	MIR7978	hsa-mir-7978	microRNA 7978	ncRNA
3134	chr16	89709964	89710057	+	11	NA	intron (NM_004913, intron 10 of 14)	intron (NM_004913, intron 10 of 14)	-1846	NR_036480	100128881		NR_036480	ENSG00000261373	VPS9D1-AS1	MYU	VPS9D1 antisense RNA 1	ncRNA
2784-3	chr2	181943827	181944467	+	11	NA	Intergenic	MamGypLTR1b|LTR|Gypsy	-10094	NR_048567	151242		NM_001080545	ENSG00000150722	PPP1R1C	IPP5	protein phosphatase 1 regulatory inhibitor subunit 1C	protein-coding
1669-13	chr3	84836830	84837112	+	11	NA	intron (NR_033860, intron 8 of 20)	intron (NR_033860, intron 8 of 20)	32604	NR_033860	440970		NR_033860	ENSG00000242641	LINC00971	-	long intergenic non-protein coding RNA 971	ncRNA
3248-3	chr2	191500394	191501046	+	11	NA	Intergenic	Intergenic	-177352	NM_001254736	64859		NM_001031716	ENSG00000173559	NABP1	NABP1-OT1|OBFC2A|SOSS-B2|SSB2	nucleic acid binding protein 1	protein-coding
2644-2	chr14	58770384	58770656	+	11	NA	Intergenic	Intergenic	-57768	NR_110547	102723742		NR_110547	ENSG00000258583	LINC01500	-	long intergenic non-protein coding RNA 1500	ncRNA
3461-2	chr19	14031557	14032127	+	11	NA	promoter-TSS (NM_004843)	promoter-TSS (NM_004843)	80	NM_004843	9466		NM_004843	ENSG00000104998	IL27RA	CRL1|IL-27RA|IL27R|TCCR|WSX1|zcytor1	interleukin 27 receptor subunit alpha	protein-coding
2880	chr1	3413929	3414570	+	11	NA	intron (NM_199454, intron 9 of 16)	intron (NM_199454, intron 9 of 16)	-40416	NM_014448	27237		NM_014448	ENSG00000130762	ARHGEF16	GEF16|NBR	Rho guanine nucleotide exchange factor 16	protein-coding
2903-2	chr16	4678205	4678636	+	11	NA	intron (NM_001142291, intron 11 of 15)	intron (NM_001142291, intron 11 of 15)	7102	NR_106827	102466731		NR_106827	ENSG00000276641	MIR6769A	hsa-mir-6769a	microRNA 6769a	ncRNA
2173	chr17	45231857	45232228	+	11	NA	intron (NM_005892, intron 2 of 26)	AluJo|SINE|Alu	10157	NM_005892	752		NM_005892	ENSG00000184922	FMNL1	C17orf1|C17orf1B|FHOD4|FMNL|KW-13	formin like 1	protein-coding
2833-4	chrUn_GL000195v1	18918	19222	+	11	NA	Intergenic	BSR/Beta|Satellite|Satellite	67665	NM_001347682	389831		NM_001242480	LOC389831	-	uncharacterized LOC389831	ncRNA
2453-6	chr17	15733309	15733748	+	11	NA	intron (NM_178571, intron 1 of 14)	intron (NM_178571, intron 1 of 14)	1251	NM_178571	353149		NM_178571	ENSG00000214946	TBC1D26	-	TBC1 domain family member 26	protein-coding
5192	chr12	124503927	124504303	+	11	NA	intron (NM_001077261, intron 2 of 47)	intron (NM_001077261, intron 2 of 47)	63497	NM_006312	9612		NM_006312	ENSG00000196498	NCOR2	CTG26|N-CoR2|SMAP270|SMRT|SMRTE|SMRTE-tau|TNRC14|TRAC|TRAC-1|TRAC1	nuclear receptor corepressor 2	protein-coding
3691-2	chr17	81123769	81124357	+	11	NA	intron (NM_001080395, intron 9 of 13)	intron (NM_001080395, intron 9 of 13)	1310	NR_030394	724027		NR_030394	ENSG00000207736	MIR657	MIRN657|hsa-mir-657	microRNA 657	ncRNA
3455	chr1	15411409	15412070	+	11	NA	intron (NM_024329, intron 1 of 3)	intron (NM_024329, intron 1 of 3)	1851	NM_024329	79180		NM_024329	ENSG00000142634	EFHD2	SWS1	EF-hand domain family member D2	protein-coding
2650-2	chr18	3585919	3586445	+	11	NA	intron (NM_001242765, intron 4 of 8)	intron (NM_001242765, intron 4 of 8)	-7932	NR_024101	649446		NM_001039796	DLGAP1-AS1	HsT914	DLGAP1 antisense RNA 1	ncRNA
1845-9	chr9	78032438	78032681	+	11	NA	promoter-TSS (NM_002072)	promoter-TSS (NM_002072)	-748	NM_002072	2776		NM_002072	ENSG00000156052	GNAQ	CMAL|CMC1|G-ALPHA-q|GAQ|SWS	G protein subunit alpha q	protein-coding
3002-2	chr19	703290	703862	+	11	NA	Intergenic	Intergenic	-5359	NM_002579	5064		NM_002579	ENSG00000099864	PALM	PALM1	paralemmin	protein-coding
2669-3	chr4	69308750	69309156	+	11	NA	Intergenic	Intergenic	28478	NM_001207004	54490		NM_053039	ENSG00000135226	UGT2B28	-	UDP glucuronosyltransferase family 2 member B28	protein-coding
1484-13	chr2	240832229	240832480	+	11	NA	Intergenic	CpG	-10951	NM_001379653	547		NM_004321	ENSG00000130294	KIF1A	ATSV|C2orf20|HSN2C|MRD9|NESCAVS|SPG30|UNC104	kinesin family member 1A	protein-coding
3439	chr4	3486823	3487011	+	11	NA	intron (NM_001256896, intron 2 of 3)	intron (NM_001256896, intron 2 of 3)	2373	NM_001256896	285489		NM_173660	ENSG00000175920	DOK7	C4orf25|CMS10|CMS1B|FADS3	docking protein 7	protein-coding
1953-4	chr17	50911947	50912162	+	11	NA	Intergenic	Intergenic	-44076	NM_001243877	10140		NM_005749	ENSG00000141232	TOB1	APRO5|APRO6|PIG49|TOB|TROB|TROB1	transducer of ERBB2, 1	protein-coding
7348	chr5	648987	649741	+	11	NA	intron (NR_164122, intron 11 of 15)	intron (NR_164122, intron 11 of 15)	37024	NM_018140	55722		NM_018140	ENSG00000112877	CEP72	-	centrosomal protein 72	protein-coding
1802-6	chr4	165236237	165236482	+	11	NA	intron (NM_001331024, intron 3 of 13)	intron (NM_001331024, intron 3 of 13)	26340	NM_001161521	11275		NM_007246	ENSG00000109466	KLHL2	ABP-KELCH|MAV|MAYVEN	kelch like family member 2	protein-coding
4105	chr19	40377789	40378462	+	11	NA	exon (NM_012268, exon 13 of 13)	exon (NM_012268, exon 13 of 13)	8279	NR_106854	102465477		NR_106854	ENSG00000275652	MIR6796	hsa-mir-6796	microRNA 6796	ncRNA
2117-2	chr2	24491222	24491495	+	11	NA	promoter-TSS (NM_001362955)	promoter-TSS (NM_001362955)	104	NM_003743	8648		NM_003743	ENSG00000084676	NCOA1	F-SRC-1|KAT13A|RIP160|SRC1|bHLHe42|bHLHe74	nuclear receptor coactivator 1	protein-coding
2210-2	chr11	64331595	64332037	+	11	NA	Intergenic	L2|LINE|L2	-8388	NM_032251	283234		NM_032251	ENSG00000168071	CCDC88B	BRLZ|CCDC88|HKRP3|gipie	coiled-coil domain containing 88B	protein-coding
1980-2	chr1	202184813	202185112	+	11	NA	intron (NR_002930, intron 15 of 21)	intron (NR_002930, intron 15 of 21)	-9028	NM_001017403	59352		NM_021636	ENSG00000133067	LGR6	GPCR|VTS20631	leucine rich repeat containing G protein-coupled receptor 6	protein-coding
4496	chr2	127630210	127630658	+	11	NA	intron (NM_001080527, intron 34 of 46)	L2c|LINE|L2	-15430	NM_001161415	2840		NM_005291	ENSG00000144230	GPR17	-	G protein-coupled receptor 17	protein-coding
2188-7	chr4	7939899	7940400	+	11	NA	promoter-TSS (NM_001134647)	promoter-TSS (NM_001134647)	-223	NM_001134647	60312		NM_021638	ENSG00000196526	AFAP1	AFAP|AFAP-110|AFAP110	actin filament associated protein 1	protein-coding
4116	chr7	44268175	44268828	+	11	NA	intron (NM_172080, intron 2 of 19)	intron (NM_172080, intron 2 of 19)	57093	NM_001220	816		NM_001220	ENSG00000058404	CAMK2B	CAM2|CAMK2|CAMKB|CaMKIIbeta|MRD54	calcium/calmodulin dependent protein kinase II beta	protein-coding
5937	chr7	151070444	151071706	+	11	NA	exon (NM_003040, exon 13 of 23)	exon (NM_003040, exon 13 of 23)	8433	NM_001199694	6522		NM_003040	ENSG00000164889	SLC4A2	AE2|BND3L|EPB3L1|HKB3|NBND3|OPTB9	solute carrier family 4 member 2	protein-coding
2044	chr15	57134682	57134814	+	11	NA	intron (NM_207038, intron 5 of 19)	intron (NM_207038, intron 5 of 19)	-84682	NM_207040	6938		NM_003205	ENSG00000140262	TCF12	CRS3|HEB|HH26|HTF4|HsT17266|TCF-12|bHLHb20|p64	transcription factor 12	protein-coding
1754-11	chr3	97989007	97989015	+	11	NA	intron (NR_047685, intron 9 of 9)	(GGT)n|Simple_repeat|Simple_repeat	-16560	NM_001042533	84864		NM_032778	ENSG00000170854	RIOX2	JMJD10|MDIG|MINA|MINA53|NO52|ROX	ribosomal oxygenase 2	protein-coding
2162-6	chr9	110971433	110971664	+	11	NA	intron (NM_001351406, intron 3 of 4)	intron (NM_001351406, intron 3 of 4)	65232	NM_001351420	1902		NM_001401	ENSG00000198121	LPAR1	EDG2|Gpcr26|LPA1|Mrec1.3|VZG1|edg-2|rec.1.3|vzg-1	lysophosphatidic acid receptor 1	protein-coding
2686-5	chr20	62404771	62405523	+	11	NA	intron (NM_031215, intron 1 of 9)	intron (NM_031215, intron 1 of 9)	2136	NM_031215	81928		NM_031215	ENSG00000149679	CABLES2	C20orf150|dJ908M14.2|ik3-2	Cdk5 and Abl enzyme substrate 2	protein-coding
2106-2	chr11	3809212	3809305	+	11	NA	intron (NR_144430, intron 1 of 3)	intron (NR_144430, intron 1 of 3)	698	NR_104272	27315		NM_014489	ENSG00000148985	PGAP2	CWH43-N|FRAG1|HPMRS3|MRT17|MRT21	post-GPI attachment to proteins 2	protein-coding
1680-8	chr17	82886020	82886289	+	11	NA	intron (NM_005993, intron 15 of 38)	intron (NM_005993, intron 15 of 38)	-46132	NM_024702	79755		NM_024702	ENSG00000141579	ZNF750	SLDPE|ZFP750	zinc finger protein 750	protein-coding
2588-2	chr17	49696436	49696869	+	11	NA	Intergenic	Intergenic	11312	NM_005827	10237		NM_005827	ENSG00000121073	SLC35B1	AXER|UGTREL1	solute carrier family 35 member B1	protein-coding
2003-8	chr8	109644406	109644724	+	11	NA	intron (NR_161375, intron 1 of 1)	intron (NR_161375, intron 1 of 1)	257	NM_001099755	55638		NM_017786	ENSG00000147642	SYBU	GOLSYN|OCSYN|SNPHL	syntabulin	protein-coding
3311-3	chr3	28575080	28575712	+	11	NA	intron (NR_038840, intron 1 of 4)	CpG	118	NR_038840	645206		NR_038840		LINC00693	-	long intergenic non-protein coding RNA 693	ncRNA
3125-2	chr21	31395032	31395094	+	11	NA	intron (NM_001353690, intron 1 of 27)	AluSz|SINE|Alu	-50709	NM_001353694	7074		NM_003253	ENSG00000156299	TIAM1	NEDLDS|TIAM-1	TIAM Rac1 associated GEF 1	protein-coding
4614-2	chr5	108787702	108788419	+	11	NA	intron (NM_001308038, intron 3 of 7)	MER52A|LTR|ERV1	39112	NM_001308028	2241		NM_005246	ENSG00000151422	FER	PPP1R74|TYK3|p94-Fer	FER tyrosine kinase	protein-coding
3653	chr19	45824964	45825438	+	11	NA	exon (NM_004819, exon 18 of 27)	exon (NM_004819, exon 18 of 27)	-9893	NM_030785	81492		NM_030785	ENSG00000104941	RSPH6A	RSHL1|RSP4|RSP6|RSPH4B	radial spoke head 6 homolog A	protein-coding
1939-5	chr5	56984116	56984427	+	11	NA	Intergenic	Intergenic	-32141	NM_152622	166968		NM_152622	ENSG00000155545	MIER3	-	MIER family member 3	protein-coding
4616	chr20	20395250	20396170	+	11	NA	intron (NM_020343, intron 39 of 39)	(GCTG)n|Simple_repeat|Simple_repeat	27606	NM_002196	3642		NM_002196	ENSG00000173404	INSM1	IA-1|IA1	INSM transcriptional repressor 1	protein-coding
3070	chr11	75463544	75464241	+	11	NA	intron (NM_030792, intron 3 of 16)	L2c|LINE|L2	-11565	NM_001351167	81544		NM_030792	ENSG00000158555	GDPD5	GDE2|PP1665	glycerophosphodiester phosphodiesterase domain containing 5	protein-coding
1663-2	chr10	71828880	71829070	+	11	NA	exon (NM_001042465, exon 5 of 15)	exon (NM_001042465, exon 5 of 15)	17092	NM_001171935	64072		NM_022124	ENSG00000107736	CDH23	CDHR23|PITA5|USH1D	cadherin related 23	protein-coding
2212-5	chr19	4065963	4066524	+	11	NA	promoter-TSS (NM_001317990)	promoter-TSS (NM_001317990)	656	NM_015898	51341		NM_015898	ENSG00000178951	ZBTB7A	FBI-1|FBI1|LRF|MNDLFH|TIP21|ZBTB7|ZNF857A|pokemon	zinc finger and BTB domain containing 7A	protein-coding
3043-3	chr6	1970334	1970912	+	11	NA	intron (NM_001253846, intron 4 of 10)	intron (NM_001253846, intron 4 of 10)	205368	NM_001253846	2762		NM_001500	ENSG00000112699	GMDS	GMD|SDR3E1	GDP-mannose 4,6-dehydratase	protein-coding
2702-4	chr19	10924190	10924588	+	11	NA	intron (NM_001321439, intron 5 of 9)	L2c|LINE|L2	4250	NM_001321440	78992		NM_024029	ENSG00000130733	YIPF2	FinGER2|YIPFbeta3B|Yip5C	Yip1 domain family member 2	protein-coding
2348-4	chr3	52428649	52428775	+	11	NA	Intergenic	Intergenic	16391	NM_020163	56920		NM_020163	ENSG00000010319	SEMA3G	sem2	semaphorin 3G	protein-coding
3294	chr17	80023105	80023776	+	11	NA	intron (NM_019020, intron 1 of 11)	intron (NM_019020, intron 1 of 11)	12432	NM_019020	125058		NM_019020	ENSG00000167291	TBC1D16	-	TBC1 domain family member 16	protein-coding
1743-8	chr5	179371727	179372067	+	11	NA	Intergenic	Intergenic	-26436	NM_021599	9509		NM_014244	ENSG00000087116	ADAMTS2	ADAM-TS2|ADAMTS-2|ADAMTS-3|EDSDERMS|NPI|PC I-NP|PCI-NP|PCINP|PCPNI|PNPI	ADAM metallopeptidase with thrombospondin type 1 motif 2	protein-coding
3069	chr1	48041836	48042414	+	11	NA	Intergenic	MIRc|SINE|MIR	-44740	NM_001194986	388630		NM_001194986	ENSG00000269113	TRABD2B	TIKI2	TraB domain containing 2B	protein-coding
2701	chr1	29120716	29120889	+	11	NA	TTS (NM_203342)	TTS (NM_203342)	1699	NM_001171868	399474		NM_001003682	ENSG00000253304	TMEM200B	TTMB	transmembrane protein 200B	protein-coding
3660	chr7	55474335	55474957	+	11	NA	intron (NM_001321242, intron 4 of 4)	intron (NM_001321242, intron 4 of 4)	52234	NM_001321251	81552		NM_030796	ENSG00000154978	VOPP1	ECOP|GASP|WBP1L2	VOPP1 WW domain binding protein	protein-coding
1567-8	chr3	50266938	50267191	+	11	NA	promoter-TSS (NM_004636)	promoter-TSS (NM_004636)	307	NR_110702	101928931		NR_110702		SEMA3B-AS1	-	SEMA3B antisense RNA 1 (head to head)	ncRNA
2687-5	chr18	7073893	7074264	+	11	NA	intron (NM_005559, intron 3 of 62)	AluSc|SINE|Alu	43719	NM_005559	284217		NM_005559	ENSG00000101680	LAMA1	LAMA|PTBHS|S-LAM-alpha	laminin subunit alpha 1	protein-coding
6200	chr20	47905782	47907095	+	11	NA	Intergenic	MER112|DNA|hAT-Charlie	-76788	NR_109942	101060004		NR_109942		LINC01523	-	long intergenic non-protein coding RNA 1523	ncRNA
5307	chr7	2538454	2539515	+	11	NA	intron (NM_001350626, intron 13 of 13)	MIRb|SINE|MIR	11910	NR_039791	100616116		NR_039791	ENSG00000264357	MIR4648	-	microRNA 4648	ncRNA
1747-12	chr3	190308109	190308175	+	11	NA	3' UTR (NM_021101, exon 4 of 4)	3' UTR (NM_021101, exon 4 of 4)	14304	NM_021101	9076		NM_021101	ENSG00000163347	CLDN1	CLD1|ILVASC|SEMP1	claudin 1	protein-coding
6476	chr19	3528651	3529672	+	11	NA	intron (NM_001136198, intron 6 of 12)	intron (NM_001136198, intron 6 of 12)	6205	NM_001136198	51343		NM_016263	ENSG00000105325	FZR1	CDC20C|CDH1|DEE109|FZR|FZR2|HCDH|HCDH1	fizzy and cell division cycle 20 related 1	protein-coding
1658	chr1	7147732	7148188	+	11	NA	intron (NM_001349608, intron 3 of 21)	(CA)n|Simple_repeat|Simple_repeat	241794	NR_146201	102725193		NR_146199	ENSG00000237728	CAMTA1-AS2	-	CAMTA1 antisense RNA 2	ncRNA
3822	chr3	31246836	31247384	+	11	NA	Intergenic	Intergenic	-85323	NR_130459	100423038		NR_130459	ENSG00000265376	MIR466	hsa-mir-466	microRNA 466	ncRNA
3113-3	chr7	1016312	1016985	+	11	NA	intron (NR_146964, intron 1 of 4)	intron (NR_146964, intron 1 of 4)	6378	NR_029898	442907		NR_029898	ENSG00000199023	MIR339	MIRN339|hsa-mir-339|mir-339	microRNA 339	ncRNA
2374-6	chr9	111954886	111955374	+	11	NA	Intergenic	MER1A|DNA|hAT-Charlie	23030	NR_039814	100616114		NR_039814	ENSG00000266315	MIR4668	mir-4668	microRNA 4668	ncRNA
1705-2	chr10	78814472	78814861	+	11	NA	Intergenic	MIRc|SINE|MIR	252782	NR_024429	283050		NR_015429	ENSG00000224596	ZMIZ1-AS1	-	ZMIZ1 antisense RNA 1	ncRNA
1775-6	chr6	36360566	36360949	+	11	NA	intron (NM_001207039, intron 6 of 6)	intron (NM_001207039, intron 6 of 6)	-23869	NM_001010903	389384		NM_001010903	ENSG00000189325	BNIP5	C6orf222	BCL2 interacting protein 5	protein-coding
2600	chr10	110822680	110823082	+	11	NA	intron (NM_001134363, intron 11 of 13)	intron (NM_001134363, intron 11 of 13)	48023	NR_026932	282997		NR_026932		PDCD4-AS1	-	PDCD4 antisense RNA 1	ncRNA
3652	chr2	42556181	42556902	+	11	NA	intron (NM_001282755, intron 2 of 17)	intron (NM_001282755, intron 2 of 17)	-11504	NM_001282756	57504		NM_020744	ENSG00000057935	MTA3	-	metastasis associated 1 family member 3	protein-coding
2531-3	chr9	133469589	133470080	+	11	NA	3' UTR (NM_001242369, exon 6 of 6)	3' UTR (NM_001242369, exon 6 of 6)	9265	NM_017585	11182		NM_017585	ENSG00000160326	SLC2A6	GLUT6|GLUT9|HSA011372	solute carrier family 2 member 6	protein-coding
4444-2	chr20	33373582	33374482	+	11	NA	intron (NM_001278169, intron 9 of 13)	L2b|LINE|L2	27487	NM_016408	51654		NM_016082	ENSG00000101391	CDK5RAP1	C20orf34|C42|CGI-05|HSPC167	CDK5 regulatory subunit associated protein 1	protein-coding
3097	chr1	9862573	9862974	+	11	NA	intron (NM_020248, intron 5 of 5)	intron (NM_020248, intron 5 of 5)	-38247	NM_014944	22883		NM_014944	ENSG00000171603	CLSTN1	ALC-ALPHA|CDHR12|CST-1|CSTN1|PIK3CD|XB31alpha|alcalpha1|alcalpha2	calsyntenin 1	protein-coding
1837-10	chr2	147060991	147061293	+	11	NA	Intergenic	Intergenic	474085	NR_026904	728773		NR_026904		PABPC1P2	PABP2|PABP4|PABPCP2|PABPCP4	poly(A) binding protein cytoplasmic 1 pseudogene 2	pseudo
2478-4	chr18	50285266	50285740	+	11	NA	intron (NM_001101654, intron 5 of 14)	intron (NM_001101654, intron 5 of 14)	2819	NM_014593	30827		NM_014593	ENSG00000154832	CXXC1	2410002I16Rik|5830420C16Rik|CFP1|CGBP|HsT2645|PCCX1|PHF18|SPP1|ZCGPC1|hCGBP	CXXC finger protein 1	protein-coding
4001	chr10	34479752	34480538	+	11	NA	intron (NM_019619, intron 3 of 24)	intron (NM_019619, intron 3 of 24)	335151	NM_001184787	56288		NM_019619	ENSG00000148498	PARD3	ASIP|Baz|PAR3|PAR3alpha|PARD-3|PARD3A|PPP1R118|SE2-5L16|SE2-5LT1|SE2-5T2	par-3 family cell polarity regulator	protein-coding
5327-2	chr17	75531102	75532073	+	11	NA	intron (NM_004524, intron 1 of 24)	intron (NM_004524, intron 1 of 24)	5885	NM_001015002	3993		NM_004524	ENSG00000073350	LLGL2	HGL|Hugl-2|LGL2	LLGL scribble cell polarity complex component 2	protein-coding
2419-2	chr8	87971362	87971774	+	11	NA	Intergenic	LTR12C|LTR|ERV1	-97553	NM_152418	138009		NM_152418	ENSG00000176566	DCAF4L2	WDR21C	DDB1 and CUL4 associated factor 4 like 2	protein-coding
4100-2	chr17	21293292	21294213	+	11	NA	intron (NM_002756, intron 1 of 11)	intron (NM_002756, intron 1 of 11)	5716	NM_002756	5606		NM_002756	ENSG00000034152	MAP2K3	MAPKK3|MEK3|MKK3|PRKMK3|SAPKK-2|SAPKK2	mitogen-activated protein kinase kinase 3	protein-coding
1895-7	chr19	8507237	8507629	+	11	NA	Intergenic	Intergenic	-4793	NM_032152	84106		NM_032152	ENSG00000133246	PRAM1	PML-RAR|PRAM-1	PML-RARA regulated adaptor molecule 1	protein-coding
5522	chr10	100341804	100342824	+	11	NA	Intergenic	Intergenic	-4919	NM_005063	6319		NM_005063	ENSG00000099194	SCD	FADS5|MSTP008|SCD1|SCDOS|hSCD1	stearoyl-CoA desaturase	protein-coding
4530	chr11	1831719	1833059	+	11	NA	Intergenic	Intergenic	-2038	NM_001290333	90019		NM_138567	ENSG00000149043	SYT8	-	synaptotagmin 8	protein-coding
3620-2	chr4	1229930	1230611	+	11	NA	intron (NM_001377193, intron 3 of 9)	intron (NM_001377193, intron 3 of 9)	18458	NM_001377188	1487		NM_001328	ENSG00000159692	CTBP1	BARS|HADDTS	C-terminal binding protein 1	protein-coding
2788-4	chr4	92100971	92101493	+	11	NA	Intergenic	Intergenic	176070	NR_125920	101929194		NR_125920		LNCPRESS2	-	lncRNA p53 regulated and ESC associated 2	ncRNA
5086	chr10	73697517	73698369	+	11	NA	5' UTR (NM_001144000, exon 1 of 8)	5' UTR (NM_001144000, exon 1 of 8)	3385	NM_001144000	729092		NM_001144000	ENSG00000172650	AGAP5	CTGLF2	ArfGAP with GTPase domain, ankyrin repeat and PH domain 5	protein-coding
2970	chr1	30250335	30250849	+	11	NA	Intergenic	MIRb|SINE|MIR	-212980	NR_110790	101929406		NR_110790	ENSG00000233399	LINC01648	-	long intergenic non-protein coding RNA 1648	ncRNA
2632-3	chr3	157753897	157754186	+	11	NA	Intergenic	Intergenic	210729	NR_166163	152078		NM_001099777	ENSG00000293490	SLC66A1LP	C3orf55|PQLC2L|SLC66A1L|SLC66A2L	solute carrier family 66 member 1 like, pseudogene	pseudo
4886	chr7	138918286	138919676	+	11	NA	exon (NM_020910, exon 2 of 20)	exon (NM_020910, exon 2 of 20)	62408	NM_001164665	57670		NM_020910	ENSG00000122778	KIAA1549	RP86	KIAA1549	protein-coding
2821-2	chr18	12420937	12421408	+	11	NA	intron (NM_006553, intron 2 of 6)	intron (NM_006553, intron 2 of 6)	983	NM_001142406	10650		NM_006553	ENSG00000141391	PRELID3A	C18orf43|HFL-EDDG1|SLMO1	PRELI domain containing 3A	protein-coding
3100-3	chr3	70516066	70516600	+	11	NA	Intergenic	Intergenic	-203695	NM_001364676	107986096		NM_001364676	ENSG00000242120	MDFIC2	-	MyoD family inhibitor domain containing 2	protein-coding
2111-2	chr12	49336723	49336809	+	11	NA	5' UTR (NM_001008223, exon 1 of 2)	5' UTR (NM_001008223, exon 1 of 2)	422	NM_001008223	338761		NM_001008223	ENSG00000186897	C1QL4	C1QTNF11|CTRP11	complement C1q like 4	protein-coding
2170-4	chr3	11498554	11498938	+	11	NA	intron (NM_001349238, intron 17 of 17)	intron (NM_001349238, intron 17 of 17)	70052	NM_001128221	9686		NM_014667	ENSG00000144560	VGLL4	VGL-4	vestigial like family member 4	protein-coding
2651-4	chr16	88262105	88262576	+	11	NA	Intergenic	Intergenic	68059	NR_110944	101928880		NR_110944	ENSG00000260420	LINC02182	LA16c-444G7.2	long intergenic non-protein coding RNA 2182	ncRNA
2230-4	chr17	60016339	60016379	+	11	NA	intron (NR_002924, intron 2 of 13)	intron (NR_002924, intron 2 of 13)	2693	NR_002924	653645		NR_002924	ENSG00000267104	TBC1D3P1-DHX40P1	DHX40P|DHX40P1|TBC1D3P1	TBC1D3P1-DHX40P1 readthrough, transcribed pseudogene	pseudo
4441	chr17	16456484	16457082	+	11	NA	intron (NM_001113567, intron 2 of 3)	MLT1O|LTR|ERVL-MaLR	15557	NR_003054	692106		NR_003054	ENSG00000277512	SNORD65	HBII-135|SNORD65A	small nucleolar RNA, C/D box 65	snoRNA
3970	chr16	50622343	50623026	+	11	NA	intron (NM_033119, intron 5 of 9)	MIR|SINE|MIR	-46171	NR_110908	101927272		NR_110908		LOC101927272	-	uncharacterized LOC101927272	ncRNA
2703-5	chr2	128283985	128284412	+	11	NA	intron (NM_004807, intron 1 of 1)	intron (NM_004807, intron 1 of 1)	34670	NM_004807	9394		NM_004807	ENSG00000136720	HS6ST1	HH15|HS6ST	heparan sulfate 6-O-sulfotransferase 1	protein-coding
2353-2	chr20	19964379	19964953	+	11	NA	intron (NM_001378238, intron 6 of 11)	intron (NM_001378238, intron 6 of 11)	-52624	NM_181528	51126		NM_016100	ENSG00000173418	NAA20	MRT73|NAT3|NAT3P|NAT5|NAT5P|dJ1002M8.1	N-alpha-acetyltransferase 20, NatB catalytic subunit	protein-coding
6556	chr11	77172710	77172901	+	11	NA	exon (NM_000260, exon 16 of 49)	exon (NM_000260, exon 16 of 49)	44559	NM_000260	4647		NM_000260	ENSG00000137474	MYO7A	DFNA11|DFNB2|MYOVIIA|MYU7A|NSRD2|USH1B	myosin VIIA	protein-coding
2840-3	chr22	33527407	33527875	+	11	NA	intron (NM_133642, intron 6 of 14)	intron (NM_133642, intron 6 of 14)	44621	NM_001378631	9215		NM_004737	ENSG00000133424	LARGE1	LARGE|MDC1D|MDDGA6|MDDGB6	LARGE xylosyl- and glucuronyltransferase 1	protein-coding
2934-2	chr7	1070609	1071285	+	11	NA	intron (NM_032350, intron 2 of 4)	(CACACA)n|Simple_repeat|Simple_repeat	15577	NM_001303474	115330		NM_138445	ENSG00000164849	GPR146	PGR8	G protein-coupled receptor 146	protein-coding
3585	chr10	103676919	103677463	+	11	NA	intron (NM_014631, intron 6 of 13)	intron (NM_014631, intron 6 of 13)	1024	NM_001365079	9644		NM_014631	ENSG00000107957	SH3PXD2A	FISH|SH3MD1|TKS5	SH3 and PX domains 2A	protein-coding
2243-3	chr6	161375020	161375348	+	11	NA	intron (NM_013987, intron 9 of 10)	intron (NM_013987, intron 9 of 10)	-95793	NR_134594	105378098		NR_134593		LOC105378098	-	uncharacterized LOC105378098	ncRNA
3857	chr10	46296252	46297192	+	11	NA	intron (NM_001278688, intron 5 of 16)	intron (NM_001278688, intron 5 of 16)	9725	NM_001354208	195977		NM_001278688	ENSG00000274209	ANTXRL	-	ANTXR like	protein-coding
2861-2	chr16	67968629	67969057	+	11	NA	promoter-TSS (NM_005072)	promoter-TSS (NM_005072)	-149	NM_001145962	6560		NM_005072	ENSG00000124067	SLC12A4	CTC-479C5.17|KCC1|hKCC1	solute carrier family 12 member 4	protein-coding
3293	chr10	77711083	77711626	+	11	NA	Intergenic	CpG	-73546	NM_001322830	3778		NM_002247	ENSG00000156113	KCNMA1	BKTM|CADEDS|IEG16|KCa1.1|LIWAS|MaxiK|PNKD3|SAKCA|SLO|SLO-ALPHA|SLO1|bA205K10.1|hSlo|mSLO1	potassium calcium-activated channel subfamily M alpha 1	protein-coding
3952-2	chr11	787327	787628	+	11	NA	3' UTR (NM_016564, exon 2 of 2)	3' UTR (NM_016564, exon 2 of 2)	2613	NM_016564	51286		NM_016564	ENSG00000184524	CEND1	BM88	cell cycle exit and neuronal differentiation 1	protein-coding
3573-2	chr6	78131488	78132016	+	11	NA	Intergenic	L1MA1|LINE|L1	407557	NR_162115	113218491		NR_162115		MIR10524	-	microRNA 10524	ncRNA
3881	chr2	20627243	20627272	+	11	NA	intron (NM_022460, intron 4 of 6)	intron (NM_022460, intron 4 of 6)	23841	NM_022460	64342		NM_022460	ENSG00000118960	HS1BP3	ETM2|HS1-BP3	HCLS1 binding protein 3	protein-coding
2208-4	chr5	144457075	144457638	+	11	NA	intron (NM_001370486, intron 2 of 2)	L2c|LINE|L2	251965	NM_001370486	57528		NM_020768	ENSG00000183775	KCTD16	-	potassium channel tetramerization domain containing 16	protein-coding
1967-10	chr9	3962409	3962791	+	11	NA	intron (NM_001042413, intron 4 of 10)	intron (NM_001042413, intron 4 of 10)	63954	NR_026663	84850		NM_032764	ENSG00000237009	GLIS3-AS1	C9orf70	GLIS3 antisense RNA 1	ncRNA
2838-6	chr5	151021173	151021239	+	11	NA	intron (NM_001329790, intron 2 of 5)	intron (NM_001329790, intron 2 of 5)	615	NM_001329790	2878		NM_002084	ENSG00000211445	GPX3	GPx-P|GSHPx-3|GSHPx-P	glutathione peroxidase 3	protein-coding
3274-3	chr15	65916497	65917182	+	11	NA	exon (NM_001385028, exon 17 of 26)	exon (NM_001385028, exon 17 of 26)	47348	NM_004663	8766		NM_004663	ENSG00000103769	RAB11A	YL8	RAB11A, member RAS oncogene family	protein-coding
1587-2	chr1	219568754	219569199	+	11	NA	Intergenic	Intergenic	-11652	NR_135822	102723886		NR_135822		LYPLAL1-AS1	-	LYPLAL1 antisense RNA 1	ncRNA
1661-2	chr1	115641602	115641862	+	11	NA	promoter-TSS (NM_001172412)	promoter-TSS (NM_001172412)	-238	NM_001172411	81839		NM_138959	ENSG00000173218	VANGL1	KITENIN|LPP2|STB2|STBM2	VANGL planar cell polarity protein 1	protein-coding
1645	chr10	13536660	13537028	+	11	NA	Intergenic	Intergenic	-7830	NM_001378150	222389		NM_152751	ENSG00000165626	BEND7	C10orf30	BEN domain containing 7	protein-coding
3519	chr1	202066949	202067832	+	11	NA	Intergenic	LTR16A|LTR|ERVL	-55527	NM_004767	9283		NM_004767	ENSG00000170075	GPR37L1	ET(B)R-LP-2|ETBR-LP-2|ETBRLP2	G protein-coupled receptor 37 like 1	protein-coding
2955-3	chr8	22137287	22137963	+	11	NA	TTS (NM_001316965)	TTS (NM_001316965)	4282	NM_025232	80346		NM_025232	ENSG00000168476	REEP4	C8orf20|PP432|Yip2c	receptor accessory protein 4	protein-coding
2735-3	chr3	69306282	69306855	+	11	NA	intron (NM_015123, intron 3 of 22)	intron (NM_015123, intron 3 of 22)	79520	NM_015123	23150		NM_015123	ENSG00000114541	FRMD4B	6030440G05Rik|GRSP1	FERM domain containing 4B	protein-coding
4373	chr7	90154140	90154789	+	11	NA	promoter-TSS (NM_012449)	promoter-TSS (NM_012449)	-5	NM_012449	26872		NM_012449	ENSG00000164647	STEAP1	PRSS24|STEAP	STEAP family member 1	protein-coding
3038	chr16	88652440	88652763	+	11	NA	exon (NM_002461, exon 10 of 10)	exon (NM_002461, exon 10 of 10)	-1548	NM_000101	1535		NM_000101	ENSG00000051523	CYBA	CGD4|p22-PHOX	cytochrome b-245 alpha chain	protein-coding
3600	chr1	67674499	67675446	+	11	NA	Intergenic	Intergenic	-10229	NM_001924	1647		NM_001924	ENSG00000116717	GADD45A	DDIT1|GADD45	growth arrest and DNA damage inducible alpha	protein-coding
4318	chr14	101073029	101073640	+	11	NA	TTS (NR_047664)	TTS (NR_047664)	3423	NR_047664	100507257		NR_047664	ENSG00000223403	MEG9	LINC00584	maternally expressed 9	ncRNA
2810-4	chr8	142608959	142609585	+	11	NA	Intergenic	Intergenic	5207	NM_015193	23237		NM_015193	ENSG00000198576	ARC	Arg3.1|hArc	activity regulated cytoskeleton associated protein	protein-coding
3625-2	chr8	29319254	29320019	+	11	NA	Intergenic	LTR6B|LTR|ERV1	29169	NM_057158	1846		NM_001394	ENSG00000120875	DUSP4	HVH2|MKP-2|MKP2|TYP	dual specificity phosphatase 4	protein-coding
2790-4	chr20	41146021	41146586	+	11	NA	intron (NM_182811, intron 1 of 31)	intron (NM_182811, intron 1 of 31)	-8303	NR_109889	101927117		NR_109889	ENSG00000226648	PLCG1-AS1	TOP1-AS1	PLCG1 antisense RNA 1	ncRNA
1886-2	chr1	29230737	29231129	+	11	NA	promoter-TSS (NM_016011)	promoter-TSS (NM_016011)	1	NM_001349716	51102		NM_016011	ENSG00000116353	MECR	CGI-63|DYTOABG|ETR1|FASN2B|NRBF1|OPA16	mitochondrial trans-2-enoyl-CoA reductase	protein-coding
4847	chr1	43360059	43360977	+	11	NA	exon (NM_001255, exon 7 of 11)	exon (NM_001255, exon 7 of 11)	1537	NM_001255	991		NM_001255	ENSG00000117399	CDC20	CDC20A|OOMD14|OZEMA14|bA276H19.3|p55CDC	cell division cycle 20	protein-coding
1592-12	chr6	19753901	19754150	+	11	NA	intron (NR_134651, intron 2 of 3)	intron (NR_134651, intron 2 of 3)	50734	NR_134651	100506885		NR_134649	ENSG00000228412	LNC-LBCS	LBCS	lncRNA bladder and prostate cancer suppressor, hnRNPK interacting	ncRNA
2712-4	chr16	81990093	81990389	+	11	NA	3' UTR (NM_145168, exon 3 of 3)	3' UTR (NM_145168, exon 3 of 3)	21229	NM_145168	93517		NM_145168	ENSG00000184860	SDR42E1	HSPC105	short chain dehydrogenase/reductase family 42E, member 1	protein-coding
2711-2	chr12	109291749	109292205	+	11	NA	intron (NM_213596, intron 2 of 9)	CpG	17307	NM_213596	121643		NM_213596	ENSG00000139445	FOXN4	-	forkhead box N4	protein-coding
1985-4	chr12	53064492	53064809	+	11	NA	TTS (NM_015319)	TTS (NM_015319)	7706	NR_106815	102466193		NR_106815	ENSG00000278108	MIR6757	hsa-mir-6757	microRNA 6757	ncRNA
3012-2	chr12	46825544	46826293	+	11	NA	promoter-TSS (NM_018018)	promoter-TSS (NM_018018)	79	NM_001143824	55089		NM_018018	ENSG00000139209	SLC38A4	ATA3|NAT3|PAAT|SNAT4	solute carrier family 38 member 4	protein-coding
6558	chr1	21924541	21925950	+	11	NA	intron (NM_001291860, intron 1 of 96)	MIRb|SINE|MIR	12065	NM_001291860	3339		NM_005529	ENSG00000142798	HSPG2	HSPG|PLC|PRCAN|SJA|SJS|SJS1	heparan sulfate proteoglycan 2	protein-coding
4540	chr2	64616998	64617757	+	11	NA	TTS (NR_034023)	TTS (NR_034023)	10065	NR_034023	339807		NR_034023	ENSG00000233694	LINC02579	-	long intergenic non-protein coding RNA 2579	ncRNA
4932	chr8	122786144	122786594	+	11	NA	intron (NM_014943, intron 1 of 3)	intron (NM_014943, intron 1 of 3)	4714	NM_014943	22882		NM_014943	ENSG00000178764	ZHX2	AFR1|RAF	zinc fingers and homeoboxes 2	protein-coding
2463	chr10	78139003	78139659	+	11	NA	Intergenic	Intergenic	105468	NM_033022	6229		NM_001026	ENSG00000138326	RPS24	DBA3|S24|eS24	ribosomal protein S24	protein-coding
3122-3	chr3	12909221	12909714	+	11	NA	intron (NM_014869, intron 10 of 13)	intron (NM_014869, intron 10 of 13)	-24256	NR_136189	105376955		NR_136189	ENSG00000232746	LINC02022	-	long intergenic non-protein coding RNA 2022	ncRNA
3878	chr6	2225204	2226147	+	11	NA	intron (NM_001500, intron 1 of 10)	intron (NM_001500, intron 1 of 10)	19930	NM_001500	2762		NM_001500	ENSG00000112699	GMDS	GMD|SDR3E1	GDP-mannose 4,6-dehydratase	protein-coding
2351-3	chr16	50313067	50313100	+	11	NA	intron (NM_001114, intron 22 of 25)	intron (NM_001114, intron 22 of 25)	20467	NR_106829	102465462		NR_106829	ENSG00000274969	MIR6771	hsa-mir-6771	microRNA 6771	ncRNA
2599-4	chr5	78518535	78519440	+	11	NA	intron (NM_005779, intron 3 of 4)	intron (NM_005779, intron 3 of 4)	129785	NM_005779	10184		NM_005779	ENSG00000145685	LHFPL2	-	LHFPL tetraspan subfamily member 2	protein-coding
2861-5	chr8	25248524	25248844	+	11	NA	intron (NM_024940, intron 2 of 51)	intron (NM_024940, intron 2 of 51)	63995	NM_024940	80005		NM_024940	ENSG00000147459	DOCK5	-	dedicator of cytokinesis 5	protein-coding
2904-2	chr21	44773182	44773932	+	11	NA	exon (NM_001202489, exon 3 of 4)	exon (NM_001202489, exon 3 of 4)	28263	NM_001202489	7327		NM_003343	ENSG00000184787	UBE2G2	UBC7	ubiquitin conjugating enzyme E2 G2	protein-coding
3286	chr16	70011349	70011892	+	11	NA	intron (NR_003610, intron 15 of 25)	intron (NR_003610, intron 15 of 25)	-18726	NR_036054	100302243		NR_036054	ENSG00000238728	MIR1972-1	MIR1972|hsa-mir-1972|hsa-mir-1972-1	microRNA 1972-1	ncRNA
3424-3	chr8	42915894	42916208	+	11	NA	intron (NM_032410, intron 2 of 21)	L2a|LINE|L2	19073	NM_032410	84376		NM_032410	ENSG00000168172	HOOK3	HK3	hook microtubule tethering protein 3	protein-coding
3694	chr3	47002461	47003021	+	11	NA	exon (NM_015175, exon 33 of 54)	exon (NM_015175, exon 33 of 54)	-8801	NR_024046	100129354		NR_024046		NRADDP	-	neurotrophin receptor associated death domain, pseudogene	pseudo
3824-2	chr9	134350083	134350934	+	11	NA	intron (NM_002957, intron 1 of 9)	intron (NM_002957, intron 1 of 9)	24053	NM_002957	6256		NM_002957	ENSG00000186350	RXRA	NR2B1|RXR-alpha|RXRalpha	retinoid X receptor alpha	protein-coding
3515	chr14_GL000225v1_random	34462	35117	+	11	NA	NA	BSR/Beta|Satellite|Satellite	NA	NA
2682-2	chr16	27315070	27315667	+	11	NA	intron (NM_001257997, intron 1 of 9)	(CACT)n|Simple_repeat|Simple_repeat	1394	NM_001257406	3566		NM_000418	ENSG00000077238	IL4R	CD124|IL-4RA|IL4RA	interleukin 4 receptor	protein-coding
1455-3	chr13	36673804	36674121	+	11	NA	promoter-TSS (NM_203451)	promoter-TSS (NM_203451)	-58	NM_203451	400120		NM_203451	ENSG00000180440	SERTM1	C13orf36	serine rich and transmembrane domain containing 1	protein-coding
1708-3	chr14	68953171	68953320	+	11	NA	intron (NM_001130004, intron 1 of 21)	intron (NM_001130004, intron 1 of 21)	26057	NM_001102	87		NM_001102	ENSG00000072110	ACTN1	BDPLT15	actinin alpha 1	protein-coding
3223	chr15	57364322	57364857	+	11	NA	Intergenic	Intergenic	-11916	NM_001252335	84952		NM_032866	ENSG00000128849	CGNL1	JACOP|PCING	cingulin like 1	protein-coding
2845-2	chr7	73560408	73560834	+	11	NA	Intergenic	Intergenic	-2931	NM_001707	9275		NM_001707	ENSG00000106635	BCL7B	SMARCJ2	BAF chromatin remodeling complex subunit BCL7B	protein-coding
2667	chr1	46442461	46442797	+	11	NA	intron (NR_045483, intron 7 of 8)	MIRb|SINE|MIR	7075	NR_121680	101929651		NR_121680	ENSG00000224863	LINC01398	-	long intergenic non-protein coding RNA 1398	ncRNA
4745	chr20	3036640	3037590	+	11	NA	intron (NM_080841, intron 22 of 23)	intron (NM_080841, intron 22 of 23)	-6507	NM_001501	2797		NM_001501	ENSG00000125787	GNRH2	GnRH-II|LH-RHII	gonadotropin releasing hormone 2	protein-coding
2377-4	chr20	9617917	9618459	+	11	NA	intron (NM_177990, intron 3 of 9)	intron (NM_177990, intron 3 of 9)	-103190	NR_109957	101929329		NR_109957	ENSG00000225988	LAMP5-AS1	-	LAMP5 antisense RNA 1	ncRNA
6842	chr11	65791476	65792106	+	11	NA	promoter-TSS (NR_108085)	promoter-TSS (NR_108085)	-923	NR_108085	101927828		NR_108085	ENSG00000255120	OVOL1-AS1	-	OVOL1 antisense RNA 1	ncRNA
2622-2	chr21	45819609	45819617	+	11	NA	intron (NM_001348243, intron 3 of 15)	intron (NM_001348243, intron 3 of 15)	16806	NR_038876	100129027		NR_038876		PCBP3-AS1	-	PCBP3 antisense RNA 1	ncRNA
2931	chr16	751632	752173	+	11	NA	Intergenic	Intergenic	-8832	NM_005823	10232		NM_005823	ENSG00000102854	MSLN	MPF|SMRP	mesothelin	protein-coding
2514	chr1	9319455	9319875	+	11	NA	intron (NM_025106, intron 1 of 2)	intron (NM_025106, intron 1 of 2)	26771	NM_025106	80176		NM_025106	ENSG00000171621	SPSB1	SSB-1|SSB1	splA/ryanodine receptor domain and SOCS box containing 1	protein-coding
3402-7	chr9	114405490	114406147	+	11	NA	intron (NM_015404, intron 9 of 11)	intron (NM_015404, intron 9 of 11)	-11413	NM_030767	80709		NM_030767	ENSG00000106948	AKNA	-	AT-hook transcription factor	protein-coding
2253-2	chr12	96129704	96129963	+	11	NA	Intergenic	MIRc|SINE|MIR	-64542	NM_005230	2004		NM_005230	ENSG00000111145	ELK3	ERP|NET|SAP-2|SAP2	ETS transcription factor ELK3	protein-coding
3047-2	chr22	41515805	41516081	+	11	NA	intron (NM_001098, intron 6 of 17)	intron (NM_001098, intron 6 of 17)	28527	NM_001018050	171568		NM_138338	ENSG00000100413	POLR3H	C25|RPC22.9|RPC8	RNA polymerase III subunit H	protein-coding
5304	chr16	565116	566009	+	11	NA	TTS (NM_145270)	TTS (NM_145270)	-1443	NM_001301159	283948		NM_176677	ENSG00000257108	NHLRC4	-	NHL repeat containing 4	protein-coding
3200-2	chr2	233061857	233062451	+	11	NA	intron (NM_001017915, intron 1 of 26).2	intron (NM_001017915, intron 1 of 26).2	1812	NM_005541	3635		NM_005541	ENSG00000168918	INPP5D	SHIP|SHIP-1|SHIP1|SIP-145|hp51CN|p150Ship	inositol polyphosphate-5-phosphatase D	protein-coding
3039-2	chr3	71213965	71214370	+	11	NA	intron (NM_001012505, intron 5 of 6)	intron (NM_001012505, intron 5 of 6)	30910	NM_001244814	27086		NM_032682	ENSG00000114861	FOXP1	12CC4|HSPC215|MFH|QRF1|hFKH1B	forkhead box P1	protein-coding
5236	chr15	77989640	77990901	+	11	NA	Intergenic	Intergenic	3955	NR_026998	91450		NR_026998		LOC91450	-	uncharacterized LOC91450	ncRNA
2903	chr15	68210960	68211493	+	11	NA	intron (NM_017882, intron 5 of 6)	intron (NM_017882, intron 5 of 6)	-5116	NM_001286694	91860		NM_033429	ENSG00000129007	CALML4	NY-BR-20	calmodulin like 4	protein-coding
4795	chr9	128438546	128439450	+	11	NA	intron (NR_031672, intron 2 of 2).4	intron (NR_031672, intron 2 of 2).4	-16157	NM_153436	4957		NM_002540	ENSG00000136811	ODF2	CT134|ODF2/1|ODF2/2|ODF84	outer dense fiber of sperm tails 2	protein-coding
3297-3	chr6	2947911	2948909	+	11	NA	exon (NM_001374515, exon 8 of 8)	exon (NM_001374515, exon 8 of 8)	13720	NM_001271825	5269		NM_004568	ENSG00000124570	SERPINB6	CAP|DFNB91|MSTP057|PI-6|PI6|PTI|SPI3	serpin family B member 6	protein-coding
3118-4	chr16	981021	981593	+	11	NA	promoter-TSS (NM_014587)	promoter-TSS (NM_014587)	306	NR_164341	115804232		NR_036442	ENSG00000260807	CEROX1	-	cytoplasmic endogenous regulator of oxidative phosphorylation 1	ncRNA
4044-2	chr4	181032681	181033421	+	11	NA	Intergenic	MER110A|LTR|ERV1	126098	NR_033918	728081		NR_033918	ENSG00000248197	LINC00290	NCRNA00290	long intergenic non-protein coding RNA 290	ncRNA
2985	chr19	33406603	33407260	+	11	NA	intron (NM_000285, intron 11 of 14)	intron (NM_000285, intron 11 of 14)	32407	NM_001252296	1054		NM_001806	ENSG00000153879	CEBPG	GPE1BP|IG/EBP-1	CCAAT enhancer binding protein gamma	protein-coding
3690	chr1	36084053	36084806	+	11	NA	intron (NM_014466, intron 1 of 9)	intron (NM_014466, intron 1 of 9)	335	NM_014466	27285		NM_014466	ENSG00000092850	TEKT2	TEKTB1|TEKTIN-T|h-tektin-t	tektin 2	protein-coding
1554-12	chr4	120055169	120055470	+	11	NA	TTS (NM_002358)	TTS (NM_002358)	11529	NM_002358	4085		NM_002358	ENSG00000164109	MAD2L1	HSMAD2|MAD2	mitotic arrest deficient 2 like 1	protein-coding
2665	chr20	54064261	54064563	+	11	NA	intron (NM_001366296, intron 1 of 10)	intron (NM_001366296, intron 1 of 10)	4073	NR_039913	100616225		NR_039913	ENSG00000265595	MIR4756	-	microRNA 4756	ncRNA
4450-2	chr7	81469798	81470560	+	11	NA	Intergenic	Intergenic	91640	NR_136264	105369146		NR_136264		LOC105369146	-	uncharacterized LOC105369146	ncRNA
2423-2	chr17	45031367	45031833	+	11	NA	intron (NM_024819, intron 3 of 4)	intron (NM_024819, intron 3 of 4)	20032	NM_001288655	79877		NM_024819	ENSG00000172992	DCAKD	-	dephospho-CoA kinase domain containing	protein-coding
3303-2	chr11	115112502	115113130	+	11	NA	Intergenic	Intergenic	-220761	NR_135108	105369509		NR_135108		LOC105369509	-	uncharacterized LOC105369509	ncRNA
2284	chr10	46028569	46028896	+	11	NA	intron (NM_001145261, intron 1 of 10)	L2b|LINE|L2	1982	NM_001145261	8031		NM_005437	ENSG00000266412	NCOA4	ARA70|ELE1|PTC3|RFG	nuclear receptor coactivator 4	protein-coding
4175	chr10	43203811	43204554	+	11	NA	intron (NM_001282862, intron 2 of 12)	intron (NM_001282862, intron 2 of 12)	25557	NM_001282862	221002		NM_145313	ENSG00000198915	RASGEF1A	CG4853	RasGEF domain family member 1A	protein-coding
3854	chr14	96283740	96283845	+	11	NA	3' UTR (NM_018036, exon 42 of 42)	3' UTR (NM_018036, exon 42 of 42)	27582	NM_000710	623		NM_000710	ENSG00000100739	BDKRB1	B1BKR|B1R|BKB1R|BKR1|BRADYB1	bradykinin receptor B1	protein-coding
3415-2	chr16	1961537	1961602	+	11	NA	TTS (NR_002327)	TTS (NR_002327)	897	NR_002327	574042		NR_002327	ENSG00000206811	SNORA10	ACA10|SNORA10A	small nucleolar RNA, H/ACA box 10	snoRNA
2834-2	chr15	61318016	61318769	+	11	NA	Intergenic	Intergenic	-89090	NM_134261	6095		NM_002943	ENSG00000069667	RORA	IDDECA|NR1F1|ROR1|ROR2|ROR3|RORa1|RORalpha|RZR-ALPHA|RZRA	RAR related orphan receptor A	protein-coding
3455-2	chr10	73497480	73497943	+	11	NA	non-coding (NR_135249, exon 22 of 22)	non-coding (NR_135249, exon 22 of 22)	-1687	NM_021132	5532		NM_021132	ENSG00000107758	PPP3CB	CALNA2|CALNB|CNA2|PP2Bbeta	protein phosphatase 3 catalytic subunit beta	protein-coding
1956-5	chr19	1974878	1975202	+	11	NA	intron (NM_001319, intron 2 of 11)	intron (NM_001319, intron 2 of 11)	-20491	NR_033400	255193		NM_152771	ENSG00000180846	CSNK1G2-AS1	C19orf34	CSNK1G2 antisense RNA 1	ncRNA
1700-8	chr20	32193832	32194151	+	11	NA	3' UTR (NM_002657, exon 3 of 3)	3' UTR (NM_002657, exon 3 of 3)	-3631	NR_002781	128854		NM_178465	ENSG00000235217	TSPY26P	TSPYL3|bA392M18.1	testis specific protein Y-linked 26, pseudogene	pseudo
2022-6	chr9	128655947	128656305	+	11	NA	intron (NM_052844, intron 1 of 8)	AluJb|SINE|Alu	724	NM_052844	89891		NM_052844	ENSG00000119333	DYNC2I2	CFAP133|DIC5|FAP133|SRTD11|WDR34|bA216B9.3	dynein 2 intermediate chain 2	protein-coding
3593	chr22	23697878	23698709	+	11	NA	exon (NM_001329425, exon 5 of 6)	exon (NM_001329425, exon 5 of 6)	1877	NM_001329425	266747		NM_153615	ENSG00000159496	RGL4	Rgr	ral guanine nucleotide dissociation stimulator like 4	protein-coding
2168-2	chr2	207155802	207156036	+	11	NA	intron (NM_001270943, intron 1 of 3)	intron (NM_001270943, intron 1 of 3)	10029	NM_003709	8609		NM_003709	ENSG00000118263	KLF7	UKLF	KLF transcription factor 7	protein-coding
3945	chr11	61655385	61656234	+	11	NA	Intergenic	LTR5_Hs|LTR|ERVK	-24582	NM_006133	747		NM_006133	ENSG00000134780	DAGLA	C11orf11|DAGL(ALPHA)|DAGLALPHA|NOC2|NSDDR	diacylglycerol lipase alpha	protein-coding
2025-4	chr17	45263143	45263156	+	11	NA	TTS (NM_003954)	TTS (NM_003954)	-1055	NM_152343	124783		NM_152343	ENSG00000184361	SPATA32	AEP2|C17orf46|TEX34|VAD1.2	spermatogenesis associated 32	protein-coding
5154	chr12	117118682	117119181	+	11	NA	intron (NR_120464, intron 2 of 2)	intron (NR_120464, intron 2 of 2)	19464	NR_120464	101928244		NR_120464		TESC-AS1	-	TESC antisense RNA 1 (head to head)	ncRNA
2153-10	chr4	2926634	2926745	+	11	NA	intron (NM_176801, intron 15 of 15)	intron (NM_176801, intron 15 of 15)	7548	NM_001120	10227		NM_001120	ENSG00000109736	MFSD10	TETRAN|TETTRAN	major facilitator superfamily domain containing 10	protein-coding
1454-4	chr14	23437020	23437310	+	11	NA	Intergenic	Intergenic	-1505	NM_000257	4625		NM_000257	ENSG00000092054	MYH7	CMD1S|CMH1|CMYP7A|CMYP7B|MPD1|MYHCB|SPMD|SPMM	myosin heavy chain 7	protein-coding
9434	chr15	77608968	77608986	+	11	NA	Intergenic	Intergenic	23935	NM_032808	84894		NM_032808	ENSG00000169783	LINGO1	LERN1|LRRN6A|MRT64|UNQ201	leucine rich repeat and Ig domain containing 1	protein-coding
2943	chr18	41827784	41828257	+	11	NA	Intergenic	L2c|LINE|L2	-127214	NM_001308020	5289		NM_002647	ENSG00000078142	PIK3C3	VPS34|Vps34|hVps34	phosphatidylinositol 3-kinase catalytic subunit type 3	protein-coding
3454	chr17	44584135	44584685	+	11	NA	Intergenic	Intergenic	26926	NM_001466	2535		NM_001466	ENSG00000180340	FZD2	Fz2|OMOD2|fz-2|fzE2|hFz2	frizzled class receptor 2	protein-coding
6556-2	chr11	77173364	77174708	+	11	NA	intron (NM_001369365, intron 17 of 49)	L2b|LINE|L2	45790	NM_000260	4647		NM_000260	ENSG00000137474	MYO7A	DFNA11|DFNB2|MYOVIIA|MYU7A|NSRD2|USH1B	myosin VIIA	protein-coding
3796-2	chr2	227038103	227038117	+	11	NA	intron (NM_000092, intron 37 of 47)	L1PA7|LINE|L1	126095	NM_000092	1286		NM_000092	ENSG00000081052	COL4A4	ATS2|BFH|BFH1|CA44	collagen type IV alpha 4 chain	protein-coding
1939-3	chr15	53449699	53450040	+	11	NA	Intergenic	Intergenic	90983	NR_102336	256764		NM_182758	ENSG00000166415	WDR72	AI2A3	WD repeat domain 72	protein-coding
3909	chr20	46182245	46183170	+	11	NA	intron (NM_021248, intron 10 of 11)	intron (NM_021248, intron 10 of 11)	64393	NR_136327	958		NM_001250	ENSG00000101017	CD40	Bp50|CDW40|TNFRSF5|p50	CD40 molecule	protein-coding
4599	chr15	85764062	85765109	+	11	NA	intron (NM_022480, intron 2 of 2)	intron (NM_022480, intron 2 of 2)	-5860	NR_120366	101929679		NR_120366		LINC02883	KMU15	long intergenic non-protein coding RNA 2883	ncRNA
2486-6	chr9	94915257	94915697	+	11	NA	intron (NM_032823, intron 5 of 14)	intron (NM_032823, intron 5 of 14)	30077	NR_147614	101928119		NR_147613		LOC101928119	-	uncharacterized LOC101928119	ncRNA
2122-5	chr15	57235874	57236230	+	11	NA	intron (NM_207038, intron 12 of 19)	intron (NM_207038, intron 12 of 19)	16622	NM_001306219	6938		NM_003205	ENSG00000140262	TCF12	CRS3|HEB|HH26|HTF4|HsT17266|TCF-12|bHLHb20|p64	transcription factor 12	protein-coding
2984-4	chr7	130667968	130668390	+	11	NA	TTS (NM_001304968)	TTS (NM_001304968)	569	NM_012133	26958		NM_012133	ENSG00000158623	COPG2	2-COP|gamma-2-COP	COPI coat complex subunit gamma 2	protein-coding
2786-3	chr15	45188087	45188706	+	11	NA	promoter-TSS (NM_001301169)	promoter-TSS (NM_001301169)	-430	NM_001301169	90525		NM_138356	ENSG00000138606	SHF	-	Src homology 2 domain containing F	protein-coding
1557-13	chr2	85547439	85547590	+	11	NA	3' UTR (NM_001142269, exon 14 of 14)	3' UTR (NM_001142269, exon 14 of 14)	8346	NM_005911	4144		NM_005911	ENSG00000168906	MAT2A	MATA2|MATII|SAMS2	methionine adenosyltransferase 2A	protein-coding
1857-8	chr16	24516963	24517158	+	11	NA	Intergenic	Intergenic	-22506	NM_018703	5930		NM_006910	ENSG00000122257	RBBP6	MY038|P2P-R|PACT|RBQ-1|SNAMA	RB binding protein 6, ubiquitin ligase	protein-coding
6105	chr11	2213769	2215123	+	11	NA	Intergenic	Intergenic	41383	NR_039834	100616126		NR_039834	ENSG00000265258	MIR4686	-	microRNA 4686	ncRNA
2324-5	chr20	50188917	50189356	+	11	NA	intron (NR_125739, intron 4 of 6)	intron (NR_125739, intron 4 of 6)	-1447	NM_001285878	1051		NM_005194	ENSG00000172216	CEBPB	C/EBP-beta|IL6DBP|NF-IL6|TCF5	CCAAT enhancer binding protein beta	protein-coding
2794-5	chr7	1468904	1469553	+	11	NA	Intergenic	Intergenic	-9758	NM_182924	79778		NM_024723	ENSG00000164877	MICALL2	JRAB|MICAL-L2	MICAL like 2	protein-coding
3348-2	chr12	57840104	57840838	+	11	NA	intron (NM_005730, intron 1 of 7)	intron (NM_005730, intron 1 of 7)	6258	NM_005730	10106		NM_005730	ENSG00000175215	CTDSP2	OS4|PSR2|SCP2	CTD small phosphatase 2	protein-coding
3751-2	chr6	41779901	41780641	+	11	NA	promoter-TSS (NM_013397)	promoter-TSS (NM_013397)	-371	NM_006653	10817		NM_006653	ENSG00000137218	FRS3	FRS2-beta|FRS2B|FRS2beta|SNT-2|SNT2	fibroblast growth factor receptor substrate 3	protein-coding
2564-2	chr22	30646646	30647118	+	11	NA	exon (NM_001001479, exon 2 of 2)	exon (NM_001001479, exon 2 of 2)	11067	NM_001318370	339665		NM_001001479	ENSG00000100036	SLC35E4	-	solute carrier family 35 member E4	protein-coding
3583-2	chr2	85161391	85162117	+	11	NA	intron (NM_031283, intron 3 of 11)	intron (NM_031283, intron 3 of 11)	-24655	NR_046797	100874334		NR_046797	ENSG00000231134	TCF7L1-IT1	-	TCF7L1 intronic transcript 1	ncRNA
2773	chr7	147257166	147257518	+	11	NA	intron (NM_014141, intron 7 of 22)	LTR87|LTR|ERVL?	120779	NR_031645	100313895		NR_031645	ENSG00000221442	MIR548F4	MIR548F-4|MIRN548F4|hsa-mir-548f-4	microRNA 548f-4	ncRNA
3701	chr5	84634242	84634865	+	11	NA	Intergenic	MER52D|LTR|ERV1	-249673	NM_005711	10085		NM_005711	ENSG00000164176	EDIL3	DEL1	EGF like repeats and discoidin domains 3	protein-coding
1824-4	chr16	4537561	4537977	+	11	NA	intron (NM_001199055, intron 1 of 5)	MER5A|DNA|hAT-Charlie	660	NM_001199054	29965		NM_013399	ENSG00000089486	CDIP1	C16orf5|CDIP|I1|LITAFL	cell death inducing p53 target 1	protein-coding
2024-2	chr15	62287620	62287988	+	11	NA	Intergenic	Intergenic	16930	NR_107034	102465869		NR_107034	ENSG00000277919	MIR8067	hsa-mir-8067	microRNA 8067	ncRNA
3463-2	chr10	618422	618930	+	11	NA	intron (NM_014974, intron 1 of 36)	intron (NM_014974, intron 1 of 36)	-9888	NR_147612	101930421		NR_147612	ENSG00000225140	LOC101930421	-	uncharacterized LOC101930421	ncRNA
2895-2	chr3	176362059	176362705	+	11	NA	Intergenic	LTR12C|LTR|ERV1	117831	NR_031687	100302204		NR_031687	ENSG00000221737	MIR548I1	MIR548I-1|MIRN548I1|hsa-mir-548i-1|mir-548i-1	microRNA 548i-1	ncRNA
2697-2	chr9	37032756	37033368	+	11	NA	intron (NR_103999, intron 1 of 8)	intron (NR_103999, intron 1 of 8)	1206	NM_001280555	5079		NM_016734	ENSG00000196092	PAX5	ALL3|BSAP|PAX-5	paired box 5	protein-coding
4401-2	chr9	129352581	129353614	+	11	NA	Intergenic	Intergenic	16174	NR_120685	100506119		NR_120685	ENSG00000233901	LINC01503	-	long intergenic non-protein coding RNA 1503	ncRNA
1554-18	chr9	37961745	37962007	+	11	NA	intron (NM_003028, intron 3 of 5)	intron (NM_003028, intron 3 of 5)	-57523	NR_024872	92014		NM_033412	ENSG00000122696	SLC25A51	CG7943|MCART1	solute carrier family 25 member 51	protein-coding
8602	chr18	48887689	48888680	+	11	NA	Intergenic	MIRc|SINE|MIR	54623	NM_001190823	4092		NM_005904	ENSG00000101665	SMAD7	CRCS3|MADH7|MADH8	SMAD family member 7	protein-coding
3866	chr1	203644800	203645332	+	11	NA	intron (NM_001365784, intron 1 of 20)	intron (NM_001365784, intron 1 of 20)	17129	NM_001365784	493		NM_001684	ENSG00000058668	ATP2B4	ATP2B2|MXRA1|PMCA4|PMCA4b|PMCA4x	ATPase plasma membrane Ca2+ transporting 4	protein-coding
2448-3	chr22	18092048	18092479	+	11	NA	3' UTR (NM_001127649, exon 5 of 5)	3' UTR (NM_001127649, exon 5 of 5)	14273	NM_017929	55670		NM_017929	ENSG00000215193	PEX26	PBD7A|PBD7B|PEX26M1T|Pex26pM1T	peroxisomal biogenesis factor 26	protein-coding
2720-2	chr11	66327294	66327742	+	11	NA	Intergenic	Intergenic	8916	NM_001363560	9610		NM_004292	ENSG00000174791	RIN1	-	Ras and Rab interactor 1	protein-coding
2748-2	chr14	90806308	90806804	+	11	NA	intron (NM_001010854, intron 1 of 19)	intron (NM_001010854, intron 1 of 19)	9861	NM_001320421	145567		NM_001010854	ENSG00000165914	TTC7B	TTC7L1|c14_5685	tetratricopeptide repeat domain 7B	protein-coding
2729-6	chr3	32367370	32368058	+	11	NA	intron (NM_178868, intron 2 of 3)	intron (NM_178868, intron 2 of 3)	-24139	NM_138410	112616		NM_138410	ENSG00000153551	CMTM7	CKLFSF7	CKLF like MARVEL transmembrane domain containing 7	protein-coding
3673	chr1	15093677	15093685	+	11	NA	intron (NM_201628, intron 8 of 14)	PRIMA4_LTR|LTR|ERV1	58783	NR_027136	200197		NM_182534	ENSG00000175147	TMEM51-AS1	C1orf126	TMEM51 antisense RNA 1	ncRNA
2094-5	chr7	36473936	36474279	+	11	NA	Intergenic	HERVL18-int|LTR|ERVL	-83750	NM_001100425	23366		NM_015314	ENSG00000164542	MATCAP2	KIAA0895|TMCP2	microtubule associated tyrosine carboxypeptidase 2	protein-coding
3344-2	chr7	37193241	37193980	+	11	NA	intron (NM_014800, intron 13 of 21)	intron (NM_014800, intron 13 of 21)	160058	NM_001206482	9844		NM_014800	ENSG00000155849	ELMO1	CED-12|CED12|ELMO-1	engulfment and cell motility 1	protein-coding
3170-2	chr14	91354745	91355327	+	11	NA	intron (NM_001080414, intron 4 of 29)	intron (NM_001080414, intron 4 of 29)	62784	NM_001080414	440193		NM_001080414	ENSG00000015133	CCDC88C	DAPLE|HKRP2|HYC1|KIAA1509|SCA40	coiled-coil domain containing 88C	protein-coding
2835-4	chr9	120384028	120384597	+	11	NA	Intergenic	Intergenic	-139262	NR_029604	406939		NR_029604	ENSG00000207814	MIR147A	MIR147|MIRN147|hsa-mir-147a	microRNA 147a	ncRNA
2163-9	chr5	179550551	179550800	+	11	NA	exon (NM_025158, exon 1 of 18)	exon (NM_025158, exon 1 of 18)	121	NM_025158	80230		NM_025158	ENSG00000176783	RUFY1	RABIP4|ZFYVE12	RUN and FYVE domain containing 1	protein-coding
2437-7	chr8	101277758	101278054	+	11	NA	Intergenic	Intergenic	-71842	NM_001267709	51123		NM_016096	ENSG00000120963	ZNF706	HSPC038|PNAS-106|PNAS-113	zinc finger protein 706	protein-coding
5374	chr11	428328	429680	+	11	NA	intron (NM_001347882, intron 10 of 21)	intron (NM_001347882, intron 10 of 21)	-11607	NM_021805	59307		NM_021805	ENSG00000185187	SIGIRR	IL-1R8|TIR8	single Ig and TIR domain containing	protein-coding
4227	chr6	33990087	33990774	+	11	NA	Intergenic	Intergenic	9621	NR_031681	100302123		NR_031681	ENSG00000221697	MIR1275	MIRN1275|hsa-mir-1275|mir-1275	microRNA 1275	ncRNA
4128	chr1	214111656	214112421	+	11	NA	Intergenic	Intergenic	123505	NM_002763	5629		NM_002763	ENSG00000117707	PROX1	-	prospero homeobox 1	protein-coding
3996-2	chr7	17434917	17435436	+	11	NA	intron (NR_110015, intron 1 of 2)	intron (NR_110015, intron 1 of 2)	60259	NR_110014	102659288		NR_110014		LINC02888	KCCAT333	long intergenic non-protein coding RNA 2888	ncRNA
4252-2	chr5	188755	189464	+	11	NA	3' UTR (NM_052909, exon 20 of 20)	3' UTR (NM_052909, exon 20 of 20)	-2386	NM_001080478	389257		NM_001080478	ENSG00000185028	LRRC14B	-	leucine rich repeat containing 14B	protein-coding
4438	chr17	81246423	81247596	+	11	NA	exon (NM_001037984, exon 15 of 16)	exon (NM_001037984, exon 15 of 16)	7095	NR_148426	284184		NM_001086521	ENSG00000224877	NDUFAF8	C17orf89|MC1DN34	NADH:ubiquinone oxidoreductase complex assembly factor 8	protein-coding
3402-5	chr16	3808398	3809037	+	11	NA	intron (NM_004380, intron 3 of 30)	intron (NM_004380, intron 3 of 30)	71403	NM_001079846	1387		NM_004380	ENSG00000005339	CREBBP	CBP|KAT3A|MKHK1|RSTS|RSTS1	CREB binding protein	protein-coding
3535	chr9	133127163	133127900	+	11	NA	intron (NM_001042368, intron 1 of 17)	intron (NM_001042368, intron 1 of 17)	1870	NM_001271775	5900		NM_006266	ENSG00000160271	RALGDS	RGDS|RGF|RalGEF	ral guanine nucleotide dissociation stimulator	protein-coding
2874	chr19	15454088	15454579	+	11	NA	intron (NM_022904, intron 13 of 17)	intron (NM_022904, intron 13 of 17)	-4377	NM_021241	58525		NM_021241	ENSG00000011451	WIZ	ZNF803	WIZ zinc finger	protein-coding
1978	chr1	2227677	2227977	+	11	NA	promoter-TSS (NM_003036)	promoter-TSS (NM_003036)	-492	NM_003036	6497		NM_003036	ENSG00000157933	SKI	SGS|SKV	SKI proto-oncogene	protein-coding
3400	chr1	25712552	25712998	+	11	NA	intron (NM_001385185, intron 1 of 10)	intron (NM_001385185, intron 1 of 10)	16620	NM_001385185	57134		NM_020379	ENSG00000117643	MAN1C1	HMIC|MAN1A3|MAN1C|pp6318	mannosidase alpha class 1C member 1	protein-coding
2771	chr10	102625211	102625846	+	11	NA	intron (NM_016169, intron 10 of 11)	intron (NM_016169, intron 10 of 11)	-18951	NM_030912	81603		NM_030912	ENSG00000171206	TRIM8	FSGSNEDS|GERP|RNF27	tripartite motif containing 8	protein-coding
2212-8	chr4	2247536	2247917	+	11	NA	3' UTR (NM_006454, exon 6 of 6)	3' UTR (NM_006454, exon 6 of 6)	2430	NR_039964	100616358		NR_039964	ENSG00000284276	MIR4800	mir-4800	microRNA 4800	ncRNA
2267-3	chr2	230874849	230875123	+	11	NA	intron (NM_001287240, intron 2 of 5)	intron (NM_001287240, intron 2 of 5)	10036	NM_001012516	81618		NM_030926	ENSG00000135916	ITM2C	BRI3|BRICD2C|E25|E25C|ITM3	integral membrane protein 2C	protein-coding
3346-2	chr1	156494390	156494787	+	11	NA	intron (NM_005920, intron 1 of 11)	intron (NM_005920, intron 1 of 11)	-3901	NM_001271629	4209		NM_005920	ENSG00000116604	MEF2D	-	myocyte enhancer factor 2D	protein-coding
2108-10	chr7	66903524	66903795	+	11	NA	promoter-TSS (NR_136637)	promoter-TSS (NR_136637)	-461	NR_136637	644794		NR_136637		LINC02604	lncHERG	long intergenic non-protein coding RNA 2604	ncRNA
3103-2	chr1	86912635	86913166	+	11	NA	intron (NR_144513, intron 1 of 4)	intron (NR_144513, intron 1 of 4)	1226	NM_004261	9403		NM_004261	ENSG00000183291	SELENOF	2025-09-15	selenoprotein F	protein-coding
2003-7	chr5	132870293	132870600	+	11	NA	Intergenic	Intergenic	-3222	NM_052971	116842		NM_052971	ENSG00000164406	LEAP2	LEAP-2	liver enriched antimicrobial peptide 2	protein-coding
2415	chr15	98428621	98428853	+	11	NA	Intergenic	Intergenic	-7739	NR_146567	105371011		NR_146566		LINC02351	-	long intergenic non-protein coding RNA 2351	ncRNA
2608-4	chr16	89364141	89364151	+	11	NA	intron (NR_045839, intron 2 of 9)	intron (NR_045839, intron 2 of 9)	43694	NR_168302	100287036		NM_001242885	LOC100287036	-	uncharacterized LOC100287036	ncRNA
2243	chr1	234881902	234882217	+	11	NA	Intergenic	Intergenic	81940	NR_125945	101927851		NR_125945	ENSG00000238005	LNCATV	-	lncRNA negative regulator of antiviral signaling	ncRNA
3481	chr17	40070957	40071638	+	11	NA	intron (NM_199334, intron 1 of 8)	intron (NM_199334, intron 1 of 8)	8332	NM_003250	7067		NM_003250	ENSG00000126351	THRA	AR7|CHNG6|EAR7|ERB-T-1|ERBA|ERBA1|NR1A1|THRA1|THRA2|THRalpha|THRalpha1|THRalpha2|TRalpha|TRalpha1|TRalpha2|c-ERBA-1|c-erbA	thyroid hormone receptor alpha	protein-coding
2334	chr1	3456913	3457242	+	11	NA	intron (NM_014448, intron 1 of 14)	MER20|DNA|hAT-Charlie	2412	NM_014448	27237		NM_014448	ENSG00000130762	ARHGEF16	GEF16|NBR	Rho guanine nucleotide exchange factor 16	protein-coding
3820	chr3	169306384	169306968	+	11	NA	intron (NM_001205194, intron 1 of 15)	AluSq2|SINE|Alu	-141191	NR_134932	105374205		NR_134932	ENSG00000241479	MECOM-AS1	-	MECOM antisense RNA 1	ncRNA
4317	chr18	2847531	2847895	+	11	NA	intron (NM_032048, intron 1 of 7)	CpG	707	NM_032048	84034		NM_032048	ENSG00000132205	EMILIN2	EMILIN-2|FOAP-10	elastin microfibril interfacer 2	protein-coding
3328-3	chr2	25247049	25247641	+	11	NA	intron (NR_135490, intron 8 of 23)	intron (NR_135490, intron 8 of 23)	4786	NM_001320893	1788		NM_022552	ENSG00000119772	DNMT3A	DNMT3A2|HESJAS|M.HsaIIIA|TBRS	DNA methyltransferase 3 alpha	protein-coding
3750	chr12	52910035	52910657	+	11	NA	intron (NM_001256293, intron 1 of 8)	intron (NM_001256293, intron 1 of 8)	-5270	NM_002273	3856		NM_002273	ENSG00000170421	KRT8	CARD2|CK-8|CK8|CYK8|K2C8|K8|KO	keratin 8	protein-coding
2229	chr1	24003390	24003627	+	11	NA	Intergenic	Intergenic	-23181	NM_006625	10772		NM_006625	ENSG00000188529	SRSF10	FUSIP1|FUSIP2|NSSR|PPP1R149|SFRS13|SFRS13A|SRp38|SRrp40|TASR|TASR1|TASR2	serine and arginine rich splicing factor 10	protein-coding
2360-4	chr20	18650923	18651216	+	11	NA	intron (NM_080820, intron 4 of 5)	intron (NM_080820, intron 4 of 5)	47639	NR_109955	101929526		NR_109955	ENSG00000233993	DTD1-AS1	-	DTD1 antisense RNA 1	ncRNA
3159-2	chr7	37014615	37015386	+	11	NA	intron (NM_014800, intron 15 of 21)	intron (NM_014800, intron 15 of 21)	17204	NR_104120	100861514		NR_104120	ENSG00000224101	ELMO1-AS1	-	ELMO1 antisense RNA 1	ncRNA
3074	chr14	35397168	35397757	+	11	NA	Intergenic	Intergenic	7287	NM_020529	4792		NM_020529	ENSG00000100906	NFKBIA	EDAID2|IKBA|MAD-3|NFKBI	NFKB inhibitor alpha	protein-coding
3489-2	chr15	40421658	40422394	+	11	NA	TTS (NM_001354597)	TTS (NM_001354597)	16231	NR_148925	3712		NM_002225	ENSG00000128928	IVD	ACAD2|IVDH	isovaleryl-CoA dehydrogenase	protein-coding
2925-2	chr16	1355716	1356239	+	11	NA	intron (NM_032520, intron 3 of 10)	G-rich|Low_complexity|Low_complexity	4046	NM_032520	84572		NM_032520	ENSG00000090581	GNPTG	C16orf27|GNPTAG|LP2537|RJD9	N-acetylglucosamine-1-phosphate transferase subunit gamma	protein-coding
2055-2	chr13	113078794	113079193	+	11	NA	intron (NM_001112732, intron 15 of 29)	intron (NM_001112732, intron 15 of 29)	-26795	NM_000131	2155		NM_000131	ENSG00000057593	F7	SPCA	coagulation factor VII	protein-coding
2249-2	chr1	179816265	179816492	+	11	NA	TTS (NM_001329717)	TTS (NM_001329717)	12454	NR_162130	113219451		NR_162130		MIR12116	-	microRNA 12116	ncRNA
3509-2	chr4	65670019	65670949	+	11	NA	promoter-TSS (NM_001318761)	promoter-TSS (NM_001318761)	5	NM_001281767	2044		NM_004439	ENSG00000145242	EPHA5	CEK7|EHK-1|EHK1|EK7|HEK7|TYRO4	EPH receptor A5	protein-coding
3058	chr11	124774533	124775058	+	11	NA	exon (NM_024631, exon 2 of 4)	exon (NM_024631, exon 2 of 4)	1447	NM_001312920	79684		NM_024631	ENSG00000120458	MSANTD2	C11orf61	Myb/SANT DNA binding domain containing 2	protein-coding
4566	chr10	77393696	77394816	+	11	NA	intron (NM_001271518, intron 1 of 27)	intron (NM_001271518, intron 1 of 27)	43384	NR_126365	101929286		NR_126365		KCNMA1-AS3	-	KCNMA1 antisense RNA 3	ncRNA
2183-3	chr6	147839512	147839861	+	11	NA	Intergenic	AluSq|SINE|Alu	330996	NM_001030060	389432		NM_001030060	ENSG00000203727	SAMD5	dJ875H10.1	sterile alpha motif domain containing 5	protein-coding
2714-5	chr5	172909504	172909999	+	11	NA	exon (NM_001031711, exon 4 of 10)	exon (NM_001031711, exon 4 of 10)	-5332	NR_162113	113218510		NR_162113		MIR10523	-	microRNA 10523	ncRNA
4180	chr2	98910677	98911711	+	11	NA	intron (NM_207362, intron 1 of 9)	MIRc|SINE|MIR	25031	NM_207362	343990		NM_207362	ENSG00000196872	CRACDL	C2orf55|KIAA1211L	CRACD like	protein-coding
3585-2	chr14	96266362	96267016	+	11	NA	Intergenic	Intergenic	10479	NM_000710	623		NM_000710	ENSG00000100739	BDKRB1	B1BKR|B1R|BKB1R|BKR1|BRADYB1	bradykinin receptor B1	protein-coding
2065-8	chr3	181844132	181844496	+	11	NA	Intergenic	Intergenic	-108050	NR_104146	100996490		NR_104146	ENSG00000242512	LINC01206	-	long intergenic non-protein coding RNA 1206	ncRNA
4100	chr10	13439581	13440241	+	11	NA	intron (NM_152751, intron 8 of 8)	intron (NM_152751, intron 8 of 8)	63682	NM_001100912	222389		NM_152751	ENSG00000165626	BEND7	C10orf30	BEN domain containing 7	protein-coding
2377-2	chr17	68100557	68100689	+	11	NA	promoter-TSS (NR_027418)	promoter-TSS (NR_027418)	-932	NR_027418	100499466		NR_027418		LINC00674	CALA	long intergenic non-protein coding RNA 674	ncRNA
2121-2	chr18	34130991	34131457	+	11	NA	intron (NM_001384470, intron 1 of 9)	intron (NM_001384470, intron 1 of 9)	-82612	NM_001353236	8715		NM_003787	ENSG00000101746	NOL4	CT125|HRIHFB2255|NOLP	nucleolar protein 4	protein-coding
2955-4	chrY	2841358	2842072	+	11	NA	intron (NM_001008, intron 1 of 6)	intron (NM_001008, intron 1 of 6)	113	NM_001008	6192		NM_001008	ENSG00000129824	RPS4Y1	RPS4Y|S4	ribosomal protein S4 Y-linked 1	protein-coding
2576-3	chr2	134178381	134179011	+	11	NA	intron (NM_001371457, intron 1 of 16)	intron (NM_001371457, intron 1 of 16)	51571	NR_037450	100500878		NR_037450	ENSG00000263813	MIR3679	mir-3679	microRNA 3679	ncRNA
2386-3	chr17	45020940	45021361	+	11	NA	Intergenic	Intergenic	30482	NM_001288655	79877		NM_024819	ENSG00000172992	DCAKD	-	dephospho-CoA kinase domain containing	protein-coding
3384-2	chr2	231047633	231048199	+	11	NA	3' UTR (NM_001144994, exon 3 of 3)	3' UTR (NM_001144994, exon 3 of 3)	-8948	NM_001191037	5707		NM_002807	ENSG00000173692	PSMD1	P112|Rpn2|S1	proteasome 26S subunit, non-ATPase 1	protein-coding
2871	chr1	1418982	1419701	+	11	NA	exon (NM_001145210, exon 4 of 4)	exon (NM_001145210, exon 4 of 4)	1935	NM_001375659	441869		NM_001145210	ENSG00000235098	ANKRD65	-	ankyrin repeat domain 65	protein-coding
4408	chr1	46188271	46188507	+	11	NA	TTS (NM_001243766)	TTS (NM_001243766)	9110	NM_001290129	55624		NM_017739	ENSG00000085998	POMGNT1	GNTI.2|GnT I.2|LGMD2O|LGMDR15|MEB|MGAT1.2|RP76|gnT-I.2	protein O-linked mannose N-acetylglucosaminyltransferase 1 (beta 1,2-)	protein-coding
2846-2	chr8	143902592	143903125	+	11	NA	Intergenic	Intergenic	-24391	NM_031308	83481		NM_031308	ENSG00000261150	EPPK1	EPIPL|EPIPL1	epiplakin 1	protein-coding
2799-4	chr3	9862526	9863058	+	11	NA	Intergenic	CpG	16020	NM_001378491	63924		NM_022094	ENSG00000187288	CIDEC	CIDE-3|CIDE3|FPLD5|FSP27	cell death inducing DFFA like effector c	protein-coding
3836	chr1	218671363	218672136	+	11	NA	intron (NR_031644, intron 3 of 6)	intron (NR_031644, intron 3 of 6)	161654	NR_146760	440714		NR_146760	ENSG00000228208	LINC02869	C1orf143	long intergenic non-protein coding RNA 2869	ncRNA
3952-3	chr11	786748	786782	+	11	NA	TTS (NM_016564)	TTS (NM_016564)	3325	NM_016564	51286		NM_016564	ENSG00000184524	CEND1	BM88	cell cycle exit and neuronal differentiation 1	protein-coding
2023	chr12	127155415	127155906	+	11	NA	Intergenic	HERVH-int|LTR|ERV1	-95263	NR_104646	101927592		NR_104646	ENSG00000249345	LINC02405	-	long intergenic non-protein coding RNA 2405	ncRNA
3447	chr7	1558872	1559522	+	11	NA	Intergenic	Intergenic	-2992	NM_001097620	202915		NM_152689	ENSG00000164855	TMEM184A	SDMG1|SLC51C1	transmembrane protein 184A	protein-coding
4238	chr8	11789034	11789598	+	11	NA	Intergenic	Intergenic	-6257	NM_001287744	2222		NM_004462	ENSG00000079459	FDFT1	DGPT|ERG9|SQS|SQSD|SS	farnesyl-diphosphate farnesyltransferase 1	protein-coding
3285-2	chr9	62915309	62916055	+	11	NA	Intergenic	CpG	-17595	NR_122077	403323		NM_203449		LERFS	-	lncRNA negative regulator of fibroblast-like synoviocyte migration, SYNCRIP interacting	ncRNA
2769-2	chr11	45179960	45180423	+	11	NA	promoter-TSS (NM_001384651)	promoter-TSS (NM_001384651)	-845	NM_001384651	56981		NM_001256695	ENSG00000019485	PRDM11	PFM8	PR/SET domain 11	protein-coding
2611	chr17	42556046	42556417	+	11	NA	Intergenic	Intergenic	-1429	NR_144402	108783654		NR_144402	ENSG00000266962	HSD17B1-AS1	-	HSD17B1 antisense RNA 1	ncRNA
4318-2	chr2	160205309	160205856	+	11	NA	Intergenic	Intergenic	-5269	NM_001282354	3694		NM_000888	ENSG00000115221	ITGB6	AI1H	integrin subunit beta 6	protein-coding
2028-2	chr12	58801917	58802231	+	11	NA	intron (NR_126341, intron 1 of 1)	intron (NR_126341, intron 1 of 1)	-20358	NR_120452	101927653		NR_120452	ENSG00000257259	LINC02388	-	long intergenic non-protein coding RNA 2388	ncRNA
2765-2	chr2	54628837	54628980	+	11	NA	intron (NM_178313, intron 12 of 30)	intron (NM_178313, intron 12 of 30)	70514	NM_178313	6711		NM_003128	ENSG00000115306	SPTBN1	DDISBA|ELF|HEL102|SPTB2|betaSpII	spectrin beta, non-erythrocytic 1	protein-coding
1848-2	chr17	49556535	49556803	+	11	NA	intron (NR_103773, intron 1 of 2)	MIR3|SINE|MIR	17395	NR_103773	100288866		NR_103773	ENSG00000249906	NGFR-AS1	-	NGFR antisense RNA 1	ncRNA
2710-5	chr19	47417728	47418318	+	11	NA	intron (NM_001346148, intron 1 of 12)	MIRb|SINE|MIR	1504	NM_020160	56917		NM_020160	ENSG00000105419	MEIS3	MRG2	Meis homeobox 3	protein-coding
1844-9	chr16	81734988	81735254	+	11	NA	Intergenic	Intergenic	-44170	NM_002661	5336		NM_002661	ENSG00000197943	PLCG2	APLAID|FCAS3|PLC-IV|PLC-gamma-2	phospholipase C gamma 2	protein-coding
5639	chr10	121368643	121369260	+	11	NA	Intergenic	Intergenic	162363	NM_001320654	2263		NM_000141	ENSG00000066468	FGFR2	BBDS|BEK|BFR-1|CD332|CEK3|CFD1|ECT1|JWS|K-SAM|KGFR|TK14|TK25	fibroblast growth factor receptor 2	protein-coding
2481-2	chr12	8449401	8449764	+	11	NA	Intergenic	LTR2B|LTR|ERV1	-6380	NM_001317999	93978		NM_001007033	ENSG00000205846	CLEC6A	CLEC4N|CLECSF10|dectin-2|hDECTIN-2	C-type lectin domain containing 6A	protein-coding
4120	chr1	204031219	204032131	+	11	NA	TTS (NR_027902)	TTS (NR_027902)	9589	NR_027902	284573		NR_027902	ENSG00000176754	LINC00303	C1orf157|NCRNA00303	long intergenic non-protein coding RNA 303	ncRNA
3340-2	chr14	91253683	91254499	+	11	NA	promoter-TSS (NM_001348437)	promoter-TSS (NM_001348437)	-211	NM_001348437	8111		NM_003485	ENSG00000119714	GPR68	AI2A6|GPR12A|OGR1	G protein-coupled receptor 68	protein-coding
3408	chr4	67106898	67107500	+	11	NA	Intergenic	Intergenic	314801	NR_110747	101927237		NR_110747	ENSG00000250075	LOC101927237	-	uncharacterized LOC101927237	ncRNA
3144	chr14	24080673	24081359	+	11	NA	3' UTR (NM_001354769, exon 4 of 4)	3' UTR (NM_001354769, exon 4 of 4)	9454	NM_006032	9362		NM_006032	ENSG00000100884	CPNE6	copine-6	copine 6	protein-coding
2718-3	chr9	4260107	4260115	+	11	NA	intron (NM_001042413, intron 2 of 10)	intron (NM_001042413, intron 2 of 10)	39957	NM_001042413	169792		NM_152629	ENSG00000107249	GLIS3	NDH|ZNF515	GLIS family zinc finger 3	protein-coding
4607	chr18	61900842	61901605	+	11	NA	Intergenic	Intergenic	-8216	NM_173557	220441		NM_173557	ENSG00000176641	RNF152	-	ring finger protein 152	protein-coding
2666-7	chr9	128150698	128151117	+	11	NA	intron (NM_005564, intron 2 of 6)	intron (NM_005564, intron 2 of 6)	1454	NM_005564	3934		NM_005564	ENSG00000148346	LCN2	24p3|MSFI|NGAL|p25	lipocalin 2	protein-coding
3135-2	chr2	105576555	105577126	+	11	NA	Intergenic	MIRc|SINE|MIR	33719	NR_038891	285000		NR_038891		LINC02946	RMEL1	long intergenic non-protein coding RNA 2946	ncRNA
5468	chr16	1533088	1533707	+	11	NA	promoter-TSS (NM_024600)	promoter-TSS (NM_024600)	-269	NM_024600	79652		NM_024600	ENSG00000131634	TMEM204	C16orf30|CLP24	transmembrane protein 204	protein-coding
3476-3	chr6	33960081	33960710	+	11	NA	Intergenic	MIR|SINE|MIR	39656	NR_031681	100302123		NR_031681	ENSG00000221697	MIR1275	MIRN1275|hsa-mir-1275|mir-1275	microRNA 1275	ncRNA
3043-2	chr16	2184480	2184940	+	11	NA	intron (NM_020764, intron 14 of 19)	intron (NM_020764, intron 14 of 19)	11895	NM_020764	57524		NM_020764	ENSG00000167971	CASKIN1	ANKS5A	CASK interacting protein 1	protein-coding
3374-2	chr5	172347717	172348186	+	11	NA	intron (NM_001308175, intron 10 of 12)	intron (NM_001308175, intron 10 of 12)	62354	NR_130933	100288254		NM_001007542	LOC100288254	-	uncharacterized LOC100288254	ncRNA
2306-3	chr14	50047306	50047762	+	11	NA	non-coding (NR_131171, exon 4 of 9)	non-coding (NR_131171, exon 4 of 9)	-40014	NR_126498	283551		NM_001012706	ENSG00000214900	LINC01588	C14orf182	long intergenic non-protein coding RNA 1588	ncRNA
2539	chr1	48207285	48207955	+	11	NA	Intergenic	Intergenic	-15096	NM_001011547	200010		NM_001011547	ENSG00000117834	SLC5A9	SGLT4	solute carrier family 5 member 9	protein-coding
2702	chr1	205666611	205666859	+	11	NA	intron (NM_033102, intron 1 of 4)	intron (NM_033102, intron 1 of 4)	13774	NM_033102	85414		NM_033102	ENSG00000158715	SLC45A3	IPCA-2|IPCA-6|IPCA-8|IPCA6|PCANAP2|PCANAP6|PCANAP8|PRST	solute carrier family 45 member 3	protein-coding
2813-2	chr11	126279871	126280369	+	11	NA	Intergenic	L2c|LINE|L2	-2967	NM_001318777	114609		NM_052887	ENSG00000150455	TIRAP	BACTS1|Mal|MyD88-2|wyatt	TIR domain containing adaptor protein	protein-coding
3122-2	chr12	121095520	121096241	+	11	NA	Intergenic	CpG	-36996	NR_033949	5027		NM_002562	ENSG00000089041	P2RX7	P2X7	purinergic receptor P2X 7	protein-coding
3674	chr17	57551833	57552513	+	11	NA	intron (NM_170721, intron 6 of 9)	intron (NM_170721, intron 6 of 9)	-28576	NR_110808	101927557		NR_110808	ENSG00000266100	LOC101927557	-	uncharacterized LOC101927557	ncRNA
1744-8	chr3	53255810	53256016	+	11	NA	exon (NM_001135055, exon 1 of 15)	exon (NM_001135055, exon 1 of 15)	109	NM_001064	7086		NM_001064	ENSG00000163931	TKT	HEL-S-48|HEL107|SDDHD|TK|TKT1	transketolase	protein-coding
4453	chr22	46651727	46651808	+	11	NA	intron (NM_001366660, intron 3 of 17)	intron (NM_001366660, intron 3 of 17)	31381	NM_015124	23151		NM_015124	ENSG00000075240	GRAMD4	DIP	GRAM domain containing 4	protein-coding
2736	chr12	55847711	55848162	+	11	NA	Intergenic	Intergenic	-5000	NR_073606	4327		NM_002429	ENSG00000123342	MMP19	CODA|MMP18|RASI-1	matrix metallopeptidase 19	protein-coding
3143-2	chr13	27011598	27012069	+	11	NA	Intergenic	Intergenic	-113700	NR_046547	100874070		NR_046547		USP12-AS1	-	USP12 antisense RNA 1	ncRNA
2619	chr20	50064611	50065157	+	11	NA	Intergenic	MIR|SINE|MIR	-23255	NR_051976	100887755		NR_051976		TRERNA1	LINC00651|treRNA	translation regulatory long non-coding RNA 1	ncRNA
3088	chr6	40308612	40309080	+	11	NA	Intergenic	Intergenic	47160	NR_038887	401260		NM_001001705	ENSG00000226070	LINC00951	-	long intergenic non-protein coding RNA 951	ncRNA
2390-7	chr8	12014906	12015162	+	11	NA	Intergenic	CpG	-14282	NM_001302695	613211		NM_001033019	ENSG00000205882	DEFB134	-	defensin beta 134	protein-coding
2437-6	chr5	137075267	137075850	+	11	NA	intron (NM_004598, intron 5 of 10)	MamRep434|DNA|TcMar-Tigger	-52639	NR_134246	105379192		NR_134246		LOC105379192	-	uncharacterized LOC105379192	ncRNA
2777	chr1	204357596	204357928	+	11	NA	intron (NM_014935, intron 1 of 22)	intron (NM_014935, intron 1 of 22)	2167	NM_014935	22874		NM_014935	ENSG00000143850	PLEKHA6	PEPP-3|PEPP3	pleckstrin homology domain containing A6	protein-coding
1590-7	chr16	81266177	81266185	+	11	NA	intron (NM_017429, intron 5 of 10)	intron (NM_017429, intron 5 of 10)	27492	NM_017429	53630		NM_017429	ENSG00000135697	BCO1	BCDO|BCDO1|BCMO|BCMO1|BCO	beta-carotene oxygenase 1	protein-coding
4440	chr11	68333799	68334857	+	11	NA	intron (NM_002335, intron 1 of 22)	intron (NM_002335, intron 1 of 22)	21737	NM_001291902	4041		NM_002335	ENSG00000162337	LRP5	BMND1|EVR1|EVR4|HBM|LR3|LRP-5|LRP-7|LRP7|OPPG|OPS|OPTA1|PCLD4|VBCH2	LDL receptor related protein 5	protein-coding
2377-3	chr17	68100916	68100932	+	11	NA	promoter-TSS (NR_027418)	promoter-TSS (NR_027418)	-631	NR_027418	100499466		NR_027418		LINC00674	CALA	long intergenic non-protein coding RNA 674	ncRNA
6754	chr9	113535891	113537171	+	11	NA	promoter-TSS (NM_001276260)	promoter-TSS (NM_001276260)	-80	NM_001276260	5998		NM_017790	ENSG00000138835	RGS3	C2PA|RGP3	regulator of G protein signaling 3	protein-coding
3719-3	chr4	140568878	140569692	+	11	NA	promoter-TSS (NM_021833)	promoter-TSS (NM_021833)	-324	NM_021833	7350		NM_021833	ENSG00000109424	UCP1	SLC25A7|UCP	uncoupling protein 1	protein-coding
1574-3	chr11	86610736	86611105	+	11	NA	intron (NR_147828, intron 2 of 14)	intron (NR_147828, intron 2 of 14)	61278	NR_147831	10873		NM_006680	ENSG00000151376	ME3	NADP-ME	malic enzyme 3	protein-coding
3238	chr17	33014042	33014699	+	11	NA	intron (NM_183377, intron 9 of 9)	intron (NM_183377, intron 9 of 9)	21519	NM_001317225	124912		NM_173847	ENSG00000141316	SPACA3	ALLP17|CT54|LYC3|LYZC|LYZL3|SLLP1	sperm acrosome associated 3	protein-coding
3564	chr19	17205315	17205737	+	11	NA	intron (NM_004145, intron 31 of 39)	intron (NM_004145, intron 31 of 39)	-9831	NM_018467	55850		NM_018467	ENSG00000053501	USE1	D12|MDS032|P31|SLT1	unconventional SNARE in the ER 1	protein-coding
3865-3	chr7	23808243	23809011	+	11	NA	intron (NM_001260505, intron 22 of 22)	L1MDa|LINE|L1	98408	NM_001260504	56164		NM_031414	ENSG00000196335	STK31	SGK396|TDRD8	serine/threonine kinase 31	protein-coding
2422-6	chr9	89553778	89554163	+	11	NA	Intergenic	Intergenic	-51042	NM_006705	10912		NM_006705	ENSG00000130222	GADD45G	CR6|DDIT2|GADD45gamma|GRP17	growth arrest and DNA damage inducible gamma	protein-coding
5533	chr17	17847274	17847989	+	11	NA	3' UTR (NM_001288787, exon 14 of 14)	3' UTR (NM_001288787, exon 14 of 14)	-10620	NM_004176	6720		NM_004176	ENSG00000072310	SREBF1	HMD|IFAP2|SREBP1|bHLHd1	sterol regulatory element binding transcription factor 1	protein-coding
2653-2	chr14	44413020	44413414	+	11	NA	Intergenic	L1MA3|LINE|L1	94066	NM_032135	84075		NM_032135	ENSG00000189139	FSCB	C14orf155	fibrous sheath CABYR binding protein	protein-coding
2797-3	chr6	69867471	69868002	+	11	NA	intron (NM_001858, intron 1 of 50)	intron (NM_001858, intron 1 of 50)	1180	NM_001858	1310		NM_001858	ENSG00000082293	COL19A1	COL9A1L|D6S228E	collagen type XIX alpha 1 chain	protein-coding
3051-2	chr11	118527026	118527631	+	11	NA	promoter-TSS (NM_001080441)	promoter-TSS (NM_001080441)	-146	NM_001080441	143941		NM_001080441	ENSG00000172425	TTC36	HBP21	tetratricopeptide repeat domain 36	protein-coding
2388	chr12	53505076	53505430	+	11	NA	exon (NM_004178, exon 7 of 9)	exon (NM_004178, exon 7 of 9)	2231	NM_003717	8620		NM_003717	ENSG00000139574	NPFF	FMRFAL	neuropeptide FF-amide peptide precursor	protein-coding
2345	chr10	85533403	85533576	+	11	NA	Intergenic	Intergenic	-44242	NR_038986	100507470		NR_038986	ENSG00000234942	GRID1-AS1	-	GRID1 antisense RNA 1	ncRNA
6664	chr9	93130356	93130594	+	11	NA	intron (NM_004148, intron 1 of 3)	intron (NM_004148, intron 1 of 3)	3776	NM_004148	4814		NM_004148	ENSG00000131669	NINJ1	NIN1|NINJURIN|hNINJ1	ninjurin 1	protein-coding
2455-5	chr9	135985843	135986506	+	11	NA	Intergenic	Intergenic	-24801	NM_016172	10422		NM_016172	ENSG00000130560	UBAC1	GBDR1|KPC2|UBADC1	UBA domain containing 1	protein-coding
5423	chr15	61750001	61751063	+	11	NA	Intergenic	Intergenic	20614	NR_146448	100506530		NR_146448	ENSG00000259284	LINC02349	-	long intergenic non-protein coding RNA 2349	ncRNA
2700-4	chr5	18719846	18720348	+	11	NA	Intergenic	Intergenic	912823	NR_134286	646241		NR_134286		LINC02223	-	long intergenic non-protein coding RNA 2223	ncRNA
3023	chr19	33277301	33277956	+	11	NA	Intergenic	Intergenic	24906	NM_004364	1050		NM_004364	ENSG00000245848	CEBPA	C/EBP-alpha|CEBP	CCAAT enhancer binding protein alpha	protein-coding
3328-2	chr11	72625980	72626496	+	11	NA	intron (NM_001146209, intron 3 of 31)	intron (NM_001146209, intron 3 of 31)	-11108	NR_029603	406931		NR_029603	ENSG00000272036	MIR139	MIR139-3p|MIRN139|mir-139	microRNA 139	ncRNA
3176	chr3	169767772	169768217	+	11	NA	exon (NM_032487, exon 2 of 2)	exon (NM_032487, exon 2 of 2)	1567	NM_032487	84517		NM_032487	ENSG00000184378	ACTRT3	ARP-T3|ARPM1	actin related protein T3	protein-coding
2245-5	chr2	121777000	121777497	+	11	NA	Intergenic	Intergenic	21597	NM_004622	7247		NM_004622	ENSG00000211460	TSN	BCLF-1|C3PO|RCHF1|REHF-1|TBRBP|TRSLN	translin	protein-coding
2878-2	chr15_KI270905v1_alt	3651570	3652128	+	11	NA	intron (NM_001302461, intron 1 of 1)	intron (NM_001302461, intron 1 of 1)	39190	NM_001302461	51621		NM_015995	ENSG00000169926	KLF13	BTEB3|FKLF2|NSLP1|RFLAT-1|RFLAT1	KLF transcription factor 13	protein-coding
3154-2	chrX	143636039	143636495	+	11	NA	promoter-TSS (NM_001184749)	promoter-TSS (NM_001184749)	-166	NM_001184749	139065		NM_173078	ENSG00000179542	SLITRK4	-	SLIT and NTRK like family member 4	protein-coding
2614-3	chr2	72694734	72695297	+	11	NA	intron (NR_135773, intron 6 of 21)	intron (NR_135773, intron 6 of 21)	131018	NM_015189	23233		NM_015189	ENSG00000144036	EXOC6B	SEC15B|SEC15L2|SEMDJL3	exocyst complex component 6B	protein-coding
2107-4	chr7	25854722	25855305	+	11	NA	Intergenic	Intergenic	-64894	NR_157808	646588		NR_157808	ENSG00000223561	LINC03007	-	long intergenic non-protein coding RNA 3007	ncRNA
3698-3	chr2	127288173	127288826	+	11	NA	intron (NM_000122, intron 7 of 14)	L2b|LINE|L2	5645	NM_000122	2071		NM_000122	ENSG00000163161	ERCC3	BTF2|GTF2H|RAD25|Ssl2|TFIIH|TTD2|XPB	ERCC excision repair 3, TFIIH core complex helicase subunit	protein-coding
2608-5	chr19	4986308	4986405	+	11	NA	intron (NM_001370093, intron 1 of 11)	CpG	17243	NM_015015	23030		NM_015015	ENSG00000127663	KDM4B	JMJD2B|MRD65|TDRD14B	lysine demethylase 4B	protein-coding
4666	chr16	50313595	50314341	+	11	NA	exon (NM_001114, exon 23 of 26)	exon (NM_001114, exon 23 of 26)	21352	NR_106829	102465462		NR_106829	ENSG00000274969	MIR6771	hsa-mir-6771	microRNA 6771	ncRNA
2152-6	chr20	33008978	33009191	+	11	NA	intron (NM_025227, intron 2 of 15)	intron (NM_025227, intron 2 of 15)	1380	NM_025227	80341		NM_025227	ENSG00000078898	BPIFB2	BPIL1|C20orf184|LPLUNC2|RYSR|dJ726C3.2	BPI fold containing family B member 2	protein-coding
3262-3	chr14	105456134	105456607	+	11	NA	intron (NM_001203258, intron 7 of 20)	intron (NM_001203258, intron 7 of 20)	-16575	NR_073082	1397		NM_001312	ENSG00000182809	CRIP2	CRIP|CRP2|ESP1	cysteine rich protein 2	protein-coding
2239	chr11	117706187	117706603	+	11	NA	intron (NM_020693, intron 3 of 32)	intron (NM_020693, intron 3 of 32)	90821	NM_020693	57453		NM_020693	ENSG00000177103	DSCAML1	DSCAM2	DS cell adhesion molecule like 1	protein-coding
2702-3	chr13	30116094	30116444	+	11	NA	Intergenic	Intergenic	-7394	NR_046998	100874146		NR_046998	ENSG00000224511	LINC00365	-	long intergenic non-protein coding RNA 365	ncRNA
4633	chr5	2038400	2039073	+	11	NA	Intergenic	CpG	151405	NR_109912	101929081		NR_109912	ENSG00000249326	CTD-2194D22.4	-	uncharacterized LOC101929081	ncRNA
3796-3	chr2	227038274	227039201	+	11	NA	intron (NM_000092, intron 37 of 47)	intron (NM_000092, intron 37 of 47)	125468	NM_000092	1286		NM_000092	ENSG00000081052	COL4A4	ATS2|BFH|BFH1|CA44	collagen type IV alpha 4 chain	protein-coding
1831-3	chr11	10454070	10454400	+	11	NA	intron (NM_000480, intron 1 of 14)	intron (NM_000480, intron 1 of 14)	-1029	NM_001025389	272		NM_000480	ENSG00000133805	AMPD3	-	adenosine monophosphate deaminase 3	protein-coding
2532-6	chr6	148405533	148405723	+	11	NA	intron (NM_001346505, intron 2 of 19)	intron (NM_001346505, intron 2 of 19)	62790	NM_015278	23328		NM_015278	ENSG00000111961	SASH1	CAPOK|DUH|DUH1|SH3D6A|dJ323M4.1	SAM and SH3 domain containing 1	protein-coding
1467-3	chr15	74835422	74835753	+	11	NA	TTS (NR_104307)	TTS (NR_104307)	5120	NR_106942	102465531		NR_106942	ENSG00000275411	MIR6882	hsa-mir-6882	microRNA 6882	ncRNA
1736	chr1	160214126	160214334	+	11	NA	non-coding (NR_123724, exon 3 of 3)	non-coding (NR_123724, exon 3 of 3)	-5361	NR_123725	729867		NR_123725	ENSG00000227741	LOC729867	-	uncharacterized LOC729867	ncRNA
3435	chr2	11746254	11746732	+	11	NA	promoter-TSS (NM_001349202)	promoter-TSS (NM_001349202)	-139	NR_146080	23175		NM_145693	ENSG00000134324	LPIN1	PAP1	lipin 1	protein-coding
3225	chr20	24753010	24753539	+	11	NA	Intergenic	MLT1A0|LTR|ERVL-MaLR	-195995	NM_003650	8530		NM_003650	ENSG00000077984	CST7	CMAP	cystatin F	protein-coding
3149-2	chrX	129843173	129843333	+	11	NA	intron (NM_016032, intron 2 of 10)	intron (NM_016032, intron 2 of 10)	346	NM_001008222	51114		NM_016032	ENSG00000188706	ZDHHC9	CGI89|CXorf11|DHHC9|MMSA1|MRXSR|MRXSZ|ZDHHC10|ZNF379|ZNF380	zinc finger DHHC-type palmitoyltransferase 9	protein-coding
2158-2	chr11	78456559	78456903	+	11	NA	intron (NM_024678, intron 11 of 13)	intron (NM_024678, intron 11 of 13)	-26895	NR_120564	101928865		NR_120564	ENSG00000251323	LINC02728	-	long intergenic non-protein coding RNA 2728	ncRNA
2417	chr14	91269640	91270001	+	11	NA	Intergenic	Intergenic	-15940	NM_001348437	8111		NM_003485	ENSG00000119714	GPR68	AI2A6|GPR12A|OGR1	G protein-coupled receptor 68	protein-coding
2516-6	chr2	119223220	119223813	+	11	NA	promoter-TSS (NM_182915)	promoter-TSS (NM_182915)	-318	NM_138637	55240		NM_018234	ENSG00000115107	STEAP3	AHMIO2|STMP3|TSAP6|dudlin-2|dudulin-2|pHyde	STEAP3 metalloreductase	protein-coding
6246	chr10	122149787	122150015	+	11	NA	intron (NM_206862, intron 7 of 22)	intron (NM_206862, intron 7 of 22)	-13729	NM_206860	10579		NM_006997	ENSG00000138162	TACC2	AZU-1|ECTACC	transforming acidic coiled-coil containing protein 2	protein-coding
3881-2	chr7	37438807	37439568	+	11	NA	intron (NM_001206480, intron 1 of 21)	intron (NM_001206480, intron 1 of 21)	9765	NM_014800	9844		NM_014800	ENSG00000155849	ELMO1	CED-12|CED12|ELMO-1	engulfment and cell motility 1	protein-coding
1929-4	chr5	176573960	176574229	+	11	NA	exon (NM_001171976, exon 7 of 32)	exon (NM_001171976, exon 7 of 32)	24752	NM_017675	54825		NM_017675	ENSG00000074276	CDHR2	PCDH24|PCLCK|PCLKC	cadherin related family member 2	protein-coding
2562-2	chr4	77048259	77048729	+	11	NA	exon (NM_001348139, exon 4 of 4)	exon (NM_001348139, exon 4 of 4)	26416	NM_001348133	10983		NM_006835	ENSG00000118816	CCNI	CCNI1|CYC1|CYI	cyclin I	protein-coding
2455	chr1	219330649	219331113	+	11	NA	Intergenic	MamRTE1|LINE|RTE-BovB	155912	NM_001300772	127018		NM_138794	ENSG00000143353	LYPLAL1	Q96AV0	lysophospholipase like 1	protein-coding
6070	chr20	32664464	32665238	+	11	NA	intron (NM_182584, intron 1 of 5)	intron (NM_182584, intron 1 of 5)	9090	NM_182584	284805		NM_182584	ENSG00000198547	C20orf203	-	chromosome 20 open reading frame 203	protein-coding
2915-5	chr6	34392619	34393138	+	11	NA	promoter-TSS (NM_006703)	promoter-TSS (NM_006703)	-209	NM_006703	11165		NM_006703	ENSG00000272325	NUDT3	DIPP|DIPP-1|DIPP1	nudix hydrolase 3	protein-coding
5788	chr17	62652864	62654040	+	11	NA	intron (NM_006039, intron 1 of 29)	intron (NM_006039, intron 1 of 29)	25782	NM_006039	9902		NM_006039	ENSG00000011028	MRC2	CD280|CLEC13E|ENDO180|UPARAP	mannose receptor C-type 2	protein-coding
4588	chr12	501907	502645	+	11	NA	intron (NM_173593, intron 1 of 19)	intron (NM_173593, intron 1 of 19)	42337	NM_173593	283358		NM_173593	ENSG00000139044	B4GALNT3	-	beta-1,4-N-acetyl-galactosaminyltransferase 3	protein-coding
2310-3	chr13	99313239	99313713	+	11	NA	intron (NR_026644, intron 4 of 8)	intron (NR_026644, intron 4 of 8)	-6077	NM_004951	1880		NM_004951	ENSG00000169508	GPR183	EBI2|hEBI2	G protein-coupled receptor 183	protein-coding
3243-2	chr20	23995160	23995762	+	11	NA	Intergenic	Intergenic	-6682	NM_178311	92086		NM_080920	ENSG00000149435	GGTLC1	GGTL6|GGTLA3|GGTLA4|dJ831C21.1|dJ831C21.2	gamma-glutamyltransferase light chain 1	protein-coding
3140-2	chr2	213261659	213262213	+	11	NA	Intergenic	MLT1H|LTR|ERVL-MaLR	22273	NR_144752	100130451		NR_144752		SPAG16-DT	-	SPAG16 divergent transcript	ncRNA
5889	chr9	129102925	129103606	+	11	NA	intron (NM_001346547, intron 3 of 13)	intron (NM_001346547, intron 3 of 13)	7528	NM_001257363	1384		NM_000755	ENSG00000095321	CRAT	CAT|CAT1|NBIA8	carnitine O-acetyltransferase	protein-coding
3769-3	chr2	105778036	105778054	+	11	NA	intron (NM_001004722, intron 1 of 3)	intron (NM_001004722, intron 1 of 3)	32982	NM_001004722	8440		NM_003581	ENSG00000071051	NCK2	GRB4|NCKbeta	NCK adaptor protein 2	protein-coding
3089	chr11	64895939	64896446	+	11	NA	intron (NM_015104, intron 39 of 40)	intron (NM_015104, intron 39 of 40)	2245	NR_106808	102466192		NR_106808	ENSG00000274986	MIR6750	hsa-mir-6750	microRNA 6750	ncRNA
2586-3	chr11	61779799	61779801	+	11	NA	intron (NM_013279, intron 16 of 25)	intron (NM_013279, intron 16 of 25)	12761	NR_030342	693196		NR_030342	ENSG00000284108	MIR611	MIRN611|hsa-mir-611	microRNA 611	ncRNA
3984	chr2	160148479	160149211	+	11	NA	intron (NM_001282389, intron 7 of 14)	L1PA6|LINE|L1	51427	NM_001282388	3694		NM_000888	ENSG00000115221	ITGB6	AI1H	integrin subunit beta 6	protein-coding
4405	chr19	7987274	7988002	+	11	NA	intron (NM_001419, intron 2 of 5)	L2a|LINE|L2	18003	NM_001419	1994		NM_001419	ENSG00000066044	ELAVL1	ELAV1|HUR|Hua|MelG	ELAV like RNA binding protein 1	protein-coding
2660-3	chr7	7114897	7115263	+	11	NA	Intergenic	L2c|LINE|L2	-18294	NR_034022	100131257		NR_034022		LOC100131257	-	zinc finger protein 655 pseudogene	pseudo
1950-7	chr5	177359368	177359698	+	11	NA	intron (NM_006480, intron 1 of 14)	intron (NM_006480, intron 1 of 14)	1609	NM_001366617	10636		NM_006480	ENSG00000169220	RGS14	-	regulator of G protein signaling 14	protein-coding
2348-6	chr5	177131792	177132231	+	11	NA	Intergenic	CpG	-1068	NM_172349	64324		NM_022455	ENSG00000165671	NSD1	ARA267|KMT3B|SOTOS|SOTOS1|STO	nuclear receptor binding SET domain protein 1	protein-coding
2206-3	chr22	50288543	50288872	+	11	NA	intron (NM_001376885, intron 5 of 36)	intron (NM_001376885, intron 5 of 36)	11628	NM_001376880	23654		NM_012401	ENSG00000196576	PLXNB2	MM1|Nbla00445|PLEXB2|dJ402G11.3|lncFAL	plexin B2	protein-coding
2538	chr1	234886059	234886449	+	11	NA	Intergenic	Intergenic	77745	NR_125945	101927851		NR_125945	ENSG00000238005	LNCATV	-	lncRNA negative regulator of antiviral signaling	ncRNA
2174-4	chr21	42021967	42022300	+	11	NA	promoter-TSS (NR_027273)	promoter-TSS (NR_027273)	129	NR_119385	150142		NM_198078	ENSG00000237232	ZNF295-AS1	C21orf121|NCRNA00318|PRED87	ZNF295 antisense RNA 1	ncRNA
1673-10	chr6	104941512	104941844	+	11	NA	Intergenic	Intergenic	-1151	NR_046407	100113403		NR_046407	ENSG00000203809	LIN28B-AS1	C6orf220|LINC00577|dJ439I14.1	LIN28B antisense RNA 1	ncRNA
1931	chr11	34166997	34167335	+	11	NA	intron (NM_145804, intron 7 of 16)	intron (NM_145804, intron 7 of 16)	61537	NM_001144030	55226		NM_024662	ENSG00000135372	NAT10	ALP|Kre33|NET43	N-acetyltransferase 10	protein-coding
3166	chr3	104126619	104127132	+	11	NA	Intergenic	LTR28C|LTR|ERV1	-602759	NR_039611	100616336		NR_039611	ENSG00000265328	MIR548AB	-	microRNA 548ab	ncRNA
3393-4	chr7	1567169	1567415	+	11	NA	TTS (NM_032302)	TTS (NM_032302)	2740	NM_001134340	84262		NM_032302	ENSG00000157778	PSMG3	C7orf48|PAC3	proteasome assembly chaperone 3	protein-coding
2221-12	chr7	139694187	139694551	+	11	NA	intron (NM_022740, intron 2 of 14)	intron (NM_022740, intron 2 of 14)	83629	NM_001113239	28996		NM_022740	ENSG00000064393	HIPK2	PRO0593	homeodomain interacting protein kinase 2	protein-coding
2541-3	chr17	72655664	72656090	+	11	NA	intron (NM_001352691, intron 8 of 10)	intron (NM_001352691, intron 8 of 10)	-15405	NR_033876	400619		NR_033876	ENSG00000227036	LINC00511	LCAL5|onco-lncRNA-12	long intergenic non-protein coding RNA 511	ncRNA
4173	chr12	53306487	53306681	+	11	NA	TTS (NM_001173466)	TTS (NM_001173466)	6889	NM_021640	60314		NM_021640	ENSG00000139637	MYG1	C12orf10|Gamm1|MST024|MSTP024|MYG	MYG1 exonuclease	protein-coding
4059-3	chr4	103937614	103938358	+	11	NA	Intergenic	LTR12C|LTR|ERV1	-218001	NM_001059	6870		NM_001059	ENSG00000169836	TACR3	HH11|NK-3R|NK3|NK3R|NKR|TAC3R|TAC3RL	tachykinin receptor 3	protein-coding
2839	chr5	126309923	126310418	+	11	NA	Intergenic	LTR22C2|LTR|ERVK	-24995	NR_105040	101927488		NR_105039		LOC101927488	-	uncharacterized LOC101927488	ncRNA
2533-2	chr2	43943942	43944389	+	11	NA	intron (NM_133259, intron 22 of 37)	intron (NM_133259, intron 22 of 37)	51824	NM_133259	10128		NM_133259	ENSG00000138095	LRPPRC	CLONE-23970|GP130|LRP130|LSFC|MC4DN5	leucine rich pentatricopeptide repeat containing	protein-coding
2115-4	chr3	126481538	126481691	+	11	NA	3' UTR (NM_001165974, exon 21 of 21)	3' UTR (NM_001165974, exon 21 of 21)	-5695	NM_001040653	79364		NM_025112	ENSG00000070476	ZXDC	ZXDL	ZXD family zinc finger C	protein-coding
2474-2	chr20	55515093	55515318	+	11	NA	Intergenic	Intergenic	-88008	NR_110064	101927796		NR_110064	ENSG00000224008	LINC01441	-	long intergenic non-protein coding RNA 1441	ncRNA
2013-12	chr3	48601220	48601525	+	11	NA	exon (NM_003365, exon 7 of 13)	exon (NM_003365, exon 7 of 13)	3778	NR_132776	106635528		NR_132776		SNORA94	-	small nucleolar RNA, H/ACA box 94	snoRNA
3351-3	chr17	8482286	8482919	+	11	NA	intron (NM_005964, intron 35 of 40)	intron (NM_005964, intron 35 of 40)	46718	NM_001330129	81565		NM_030808	ENSG00000166579	NDEL1	EOPA|MITAP1|NDE1L1|NDE2|NUDEL	nudE neurodevelopment protein 1 like 1	protein-coding
2399-3	chr16	72073004	72073284	+	11	NA	intron (NM_001384360, intron 2 of 5)	LTR10B|LTR|ERV1	9918	NM_001384360	3250		NM_020995	ENSG00000261701	HPR	A-259H10.2|HP	haptoglobin-related protein	protein-coding
2624-2	chr10	69644931	69645442	+	11	NA	Intergenic	Intergenic	14939	NM_145306	219738		NM_145306	ENSG00000171224	FAM241B	C10orf35	family with sequence similarity 241 member B	protein-coding
1654-10	chr13	98840214	98840564	+	11	NA	intron (NM_001318849, intron 38 of 54)	intron (NM_001318849, intron 38 of 54)	8305	NR_046663	100874096		NR_046663	ENSG00000229918	DOCK9-AS1	-	DOCK9 antisense RNA 1	ncRNA
1907-7	chr2	200328462	200328779	+	11	NA	intron (NM_001282744, intron 1 of 12)	intron (NM_001282744, intron 1 of 12)	19670	NM_001282744	26010		NM_015535	ENSG00000196141	SPATS2L	DNAPTP6|SGNP	spermatogenesis associated serine rich 2 like	protein-coding
3947	chr17	82879292	82879966	+	11	NA	intron (NM_005993, intron 14 of 38)	intron (NM_005993, intron 14 of 38)	-39607	NM_024702	79755		NM_024702	ENSG00000141579	ZNF750	SLDPE|ZFP750	zinc finger protein 750	protein-coding
3064	chr1	11480183	11480647	+	11	NA	intron (NM_020780, intron 1 of 20)	CpG	1260	NM_020780	57540		NM_020780	ENSG00000204624	DISP3	PTCHD2	dispatched RND transporter family member 3	protein-coding
2517	chr17	3737864	3738424	+	11	NA	intron (NM_002208, intron 20 of 30)	intron (NM_002208, intron 20 of 30)	14241	NM_031965	83903		NM_031965	ENSG00000177602	HASPIN	GSG2	histone H3 associated protein kinase	protein-coding
4742	chr17	41974514	41975601	+	11	NA	3' UTR (NM_001330216, exon 4 of 4)	3' UTR (NM_001330216, exon 4 of 4)	7260	NM_001330216	1267		NM_033133	ENSG00000173786	CNP	CNP1|HLD20	2',3'-cyclic nucleotide 3' phosphodiesterase	protein-coding
4365-2	chr4	150255485	150256134	+	11	NA	intron (NR_036614, intron 16 of 16)	intron (NR_036614, intron 16 of 16)	177364	NM_001040261	166614		NM_152619	ENSG00000170390	DCLK2	CL2|CLICK-II|CLICK2|CLIK2|DCAMKL2|DCDC3|DCDC3B|DCK2	doublecortin like kinase 2	protein-coding
2840-2	chr19	35095906	35096379	+	11	NA	intron (NR_024561, intron 1 of 3)	L2|LINE|L2	10129	NR_024561	100128675		NR_024561	ENSG00000227392	HPN-AS1	-	HPN antisense RNA 1	ncRNA
4005	chr8	97594952	97595604	+	11	NA	Intergenic	L1PA3|LINE|L1	-48906	NM_001363137	92140		NM_178812	ENSG00000147649	MTDH	3D3|AEG-1|AEG1|LYRIC|LYRIC/3D3	metadherin	protein-coding
2771-5	chr21	34204341	34204693	+	11	NA	Intergenic	Intergenic	23840	NR_027266	114036		NM_153751	ENSG00000227456	LINC00310	C21orf82|NCRNA00310	long intergenic non-protein coding RNA 310	ncRNA
3378-4	chr5	178164115	178164890	+	11	NA	Intergenic	Intergenic	-10542	NM_001034833	55651		NM_017838	ENSG00000145912	NHP2	DKCB2|NHP2P|NOLA2	NHP2 ribonucleoprotein	protein-coding
2024-6	chr5	31051949	31052430	+	11	NA	Intergenic	Intergenic	-141497	NM_001362435	1004		NM_004932	ENSG00000113361	CDH6	CAD6|KCAD	cadherin 6	protein-coding
2175-2	chr7	80918725	80919346	+	11	NA	promoter-TSS (NM_006379)	promoter-TSS (NM_006379)	16	NM_006379	10512		NM_006379	ENSG00000075223	SEMA3C	SEMAE|SemE	semaphorin 3C	protein-coding
2582	chr17	18992753	18993085	+	11	NA	intron (NM_001039999, intron 2 of 5)	intron (NM_001039999, intron 2 of 5)	11845	NM_001039999	644815		NM_001039999	ENSG00000188522	FAM83G	PAWS1	family with sequence similarity 83 member G	protein-coding
2755-4	chr3	184327824	184328199	+	11	NA	intron (NM_198244, intron 23 of 29)	intron (NM_198244, intron 23 of 29)	2315	NR_003055	692107		NR_003055	ENSG00000212158	SNORD66	HBII-142	small nucleolar RNA, C/D box 66	snoRNA
2281-2	chr4	11740885	11741397	+	11	NA	non-coding (NR_146995, exon 4 of 4)	non-coding (NR_146995, exon 4 of 4)	28327	NR_146995	105374484		NR_146995	ENSG00000248300	LINC02360	-	long intergenic non-protein coding RNA 2360	ncRNA
3186-2	chr20	775588	776344	+	11	NA	promoter-TSS (NM_001370086)	promoter-TSS (NM_001370086)	19	NM_001370085	113278		NM_033409	ENSG00000101276	SLC52A3	BVVLS|BVVLS1|C20orf54|RFT2|RFVT3|bA371L19.1|hRFT2	solute carrier family 52 member 3	protein-coding
3628	chr15	90952949	90953625	+	11	NA	exon (NM_001323620, exon 19 of 20)	exon (NM_001323620, exon 19 of 20)	-1589	NM_001017919	91433		NM_033544	ENSG00000166965	RCCD1	-	RCC1 domain containing 1	protein-coding
2578	chr1	21257264	21257426	+	11	NA	intron (NM_001397, intron 7 of 18)	intron (NM_001397, intron 7 of 18)	22270	NM_001113347	1889		NM_001397	ENSG00000117298	ECE1	ECE	endothelin converting enzyme 1	protein-coding
1606-11	chr2	32275712	32275857	+	11	NA	Intergenic	LTR5_Hs|LTR|ERVK	-2120	NM_032312	84272		NM_032312	ENSG00000119820	YIPF4	FinGER4|Nbla11189|YIPFalpha2	Yip1 domain family member 4	protein-coding
4995	chr17	83173616	83174609	+	11	NA	Intergenic	Intergenic	-52785	NR_029406	388574		NR_029406	ENSG00000293087	RPL23AP87	-	ribosomal protein L23a pseudogene 87	pseudo
4133	chr19	58513661	58514326	+	11	NA	3' UTR (NM_001316978, exon 3 of 3)	3' UTR (NM_001316978, exon 3 of 3)	-1928	NM_001321196	10998		NM_012254	ENSG00000083807	SLC27A5	ACSB|ACSVL6|BACS|BAL|FACVL3|FATP-5|FATP5|VLACSR|VLCS-H2|VLCSH2	solute carrier family 27 member 5	protein-coding
2887-4	chr7	107359216	107359837	+	11	NA	intron (NM_001379511, intron 10 of 20)	MER52A|LTR|ERV1	-110531	NM_005295	2845		NM_005295	ENSG00000172209	GPR22	-	G protein-coupled receptor 22	protein-coding
5941	chr11	68349337	68350990	+	11	NA	intron (NM_002335, intron 2 of 22)	AluSz|SINE|Alu	37572	NM_001291902	4041		NM_002335	ENSG00000162337	LRP5	BMND1|EVR1|EVR4|HBM|LR3|LRP-5|LRP-7|LRP7|OPPG|OPS|OPTA1|PCLD4|VBCH2	LDL receptor related protein 5	protein-coding
1881-10	chr19	39941691	39941980	+	11	NA	Intergenic	LTR35B|LTR|ERV1	-7209	NM_003890	8857		NM_003890	ENSG00000275395	FCGBP	FC(GAMMA)BP	Fc gamma binding protein	protein-coding
3513	chr22	23156654	23157307	+	11	NA	intron (NM_004914, intron 6 of 10)	intron (NM_004914, intron 6 of 10)	11503	NM_004914	9609		NM_004914	ENSG00000100228	RAB36	-	RAB36, member RAS oncogene family	protein-coding
1701-7	chr22	20708373	20708978	+	11	NA	intron (NM_001362863, intron 53 of 53)	intron (NM_001362863, intron 53 of 53)	7561	NR_026815	84222		NM_032262	ENSG00000291085	TMEM191A	TMEM191AP	transmembrane protein 191A (pseudogene)	pseudo
2461-3	chr18	31373594	31374237	+	11	NA	intron (NR_110788, intron 1 of 3)	intron (NR_110788, intron 1 of 3)	-2862	NM_177986	147409		NM_177986	ENSG00000175065	DSG4	CDGF13|CDHF13|HYPT6|LAH	desmoglein 4	protein-coding
2207-6	chr15	92623205	92623682	+	11	NA	intron (NM_207446, intron 2 of 2)	intron (NM_207446, intron 2 of 2)	32332	NM_207446	400451		NM_207446	ENSG00000185442	FAM174B	-	family with sequence similarity 174 member B	protein-coding
2070-2	chr11	85775295	85775426	+	11	NA	intron (NM_032943, intron 1 of 18)	MIRc|SINE|MIR	-17291	NM_001162953	54843		NM_017695	ENSG00000137501	SYTL2	CHR11SYT|EXO4|PPP1R151|SGA72M|SLP2|SLP2A	synaptotagmin like 2	protein-coding
2405-6	chr2	233461366	233461752	+	11	NA	intron (NM_001377259, intron 22 of 27)	intron (NM_001377259, intron 22 of 27)	28339	NR_168055	55230		NM_018218	ENSG00000085982	USP40	-	ubiquitin specific peptidase 40	protein-coding
4076	chr19	55671335	55672107	+	11	NA	intron (NM_007279, intron 11 of 11)	L2a|LINE|L2	-3474	NM_013333	29924		NM_013333	ENSG00000063245	EPN1	-	epsin 1	protein-coding
3472-2	chr9	26955170	26955586	+	11	NA	promoter-TSS (NM_001099224)	promoter-TSS (NM_001099224)	929	NR_121605	101929602		NR_121605	ENSG00000234676	IFT74-AS1	-	IFT74 antisense RNA 1	ncRNA
3622	chr3	129584160	129584820	+	11	NA	exon (NM_015103, exon 6 of 36)	exon (NM_015103, exon 6 of 36)	22186	NM_015103	23129		NM_015103	ENSG00000004399	PLXND1	CHTD9|PLEXD1	plexin D1	protein-coding
1952-2	chr2	126879575	126880047	+	11	NA	Intergenic	Intergenic	-19079	NR_136239	101929926		NM_001322244	ENSG00000237524	TEX51	-	testis expressed 51	protein-coding
2386-7	chr8	123232497	123232866	+	11	NA	intron (NM_001204180, intron 4 of 5)	intron (NM_001204180, intron 4 of 5)	8696	NM_032847	84933		NM_032847	ENSG00000189376	C8orf76	-	chromosome 8 open reading frame 76	protein-coding
2450-2	chr4	21211160	21211765	+	11	NA	intron (NM_147182, intron 2 of 8)	MER1B|DNA|hAT-Charlie	92444	NM_147183	80333		NM_025221	ENSG00000185774	KCNIP4	CALP|KCHIP4	potassium voltage-gated channel interacting protein 4	protein-coding
2769-5	chr6	169638832	169639200	+	11	NA	intron (NR_146875, intron 13 of 20)	intron (NR_146875, intron 13 of 20)	63013	NM_001350623	253769		NM_182552	ENSG00000184465	WDR27	-	WD repeat domain 27	protein-coding
1504-20	chr7	356721	357038	+	11	NA	Intergenic	Intergenic	-22546	NR_033960	442497		NR_033960	ENSG00000249574	LOC442497	-	uncharacterized LOC442497	ncRNA
2590-4	chr3	64157068	64157659	+	11	NA	exon (NM_198859, exon 5 of 8)	exon (NM_198859, exon 5 of 8)	-30181	NR_046702	100874243		NR_046702	ENSG00000226017	PRICKLE2-AS3	-	PRICKLE2 antisense RNA 3	ncRNA
2723-2	chr20	58989945	58990144	+	11	NA	intron (NM_198976, intron 7 of 14)	intron (NM_198976, intron 7 of 14)	8788	NM_198976	51497		NM_016397	ENSG00000101158	NELFCD	HSPC130|NELF-C|NELF-D|TH1|TH1L	negative elongation factor complex member C/D	protein-coding
2976	chr17	16751290	16751881	+	11	NA	intron (NR_130142, intron 11 of 15)	L1PA16|LINE|L1	-35307	NR_003190	162632		NR_003190	ENSG00000290976	USP32P1	-	ubiquitin specific peptidase 32 pseudogene 1	pseudo
2350-4	chr2	70871608	70871977	+	11	NA	Intergenic	CpG	-16079	NR_126384	104355141		NR_126384	ENSG00000237751	LINC01143	-	long intergenic non-protein coding RNA 1143	ncRNA
2832-2	chr12	20716128	20716547	+	11	NA	intron (NM_001145946, intron 7 of 15)	intron (NM_001145946, intron 7 of 15)	20872	NM_001145944	53919		NM_017435	ENSG00000139155	SLCO1C1	OATP-F|OATP-RP5|OATP1|OATP14|OATP1C1|OATPF|OATPRP5|SLC21A14	solute carrier organic anion transporter family member 1C1	protein-coding
3982	chr14	68089172	68089546	+	11	NA	intron (NM_133509, intron 7 of 10)	intron (NM_133509, intron 7 of 10)	265767	NM_001321815	5890		NM_002877	ENSG00000182185	RAD51B	R51H2|RAD51L1|REC2	RAD51 paralog B	protein-coding
2689-2	chr5	80195846	80196376	+	11	NA	intron (NM_001174072, intron 2 of 11)	intron (NM_001174072, intron 2 of 11)	59937	NM_001174071	256987		NM_178276	ENSG00000164300	SERINC5	C5orf12|TPO1	serine incorporator 5	protein-coding
2166-6	chr21	30408596	30409146	+	11	NA	Intergenic	L1PA16|LINE|L1	12840	NM_181599	140258		NM_181599	ENSG00000198390	KRTAP13-1	KAP13.1|KRTAP13.1	keratin associated protein 13-1	protein-coding
2802-2	chr10	102669526	102670199	+	11	NA	Intergenic	Intergenic	25367	NM_001345950	81603		NM_030912	ENSG00000171206	TRIM8	FSGSNEDS|GERP|RNF27	tripartite motif containing 8	protein-coding
2592-4	chr18	75209678	75210078	+	11	NA	promoter-TSS (NM_001308210)	promoter-TSS (NM_001308210)	-739	NM_175907	284273		NM_175907	ENSG00000180011	PTGR3	PRG-3|PTGR-3|ZADH2	prostaglandin reductase 3	protein-coding
1899-11	chr5	124305972	124306298	+	11	NA	intron (NR_125774, intron 4 of 5)	HERVH-int|LTR|ERV1	132385	NR_125774	103724389		NR_125774		LINC01170	-	long intergenic non-protein coding RNA 1170	ncRNA
5788-2	chr17	62654228	62654279	+	11	NA	intron (NM_006039, intron 1 of 29)	intron (NM_006039, intron 1 of 29)	26583	NM_006039	9902		NM_006039	ENSG00000011028	MRC2	CD280|CLEC13E|ENDO180|UPARAP	mannose receptor C-type 2	protein-coding
1562-9	chr5	78504593	78505035	+	11	NA	intron (NM_005779, intron 4 of 4)	intron (NM_005779, intron 4 of 4)	143958	NM_005779	10184		NM_005779	ENSG00000145685	LHFPL2	-	LHFPL tetraspan subfamily member 2	protein-coding
2898	chr1	204431574	204432093	+	11	NA	intron (NM_001377335, intron 30 of 35)	intron (NM_001377335, intron 30 of 35)	-20016	NM_032833	84919		NM_032833	ENSG00000158615	PPP1R15B	CREP|MSSGM2	protein phosphatase 1 regulatory subunit 15B	protein-coding
2771-7	chr3	156689617	156690034	+	11	NA	intron (NM_001184718, intron 2 of 5)	intron (NM_001184718, intron 2 of 5)	13161	NM_001184718	25976		NM_015508	ENSG00000163659	TIPARP	ARTD14|PARP7|pART14	TCDD inducible poly(ADP-ribose) polymerase	protein-coding
3180-3	chr2	238868234	238868987	+	11	NA	intron (NM_001271893, intron 1 of 1)	intron (NM_001271893, intron 1 of 1)	20525	NM_001271893	117581		NM_057179	ENSG00000233608	TWIST2	AMS|BBRSAY|DERMO1|FFDD3|SETLSS|bHLHa39	twist family bHLH transcription factor 2	protein-coding
3483-2	chr20	33644683	33645224	+	11	NA	3' UTR (NM_001039709, exon 11 of 11)	3' UTR (NM_001039709, exon 11 of 11)	-17374	NM_080825	128864		NM_080825	ENSG00000149609	C20orf144	dJ63M2.6	chromosome 20 open reading frame 144	protein-coding
2103-9	chr3	184325193	184325396	+	11	NA	promoter-TSS (NR_003055)	promoter-TSS (NR_003055)	-402	NR_003055	692107		NR_003055	ENSG00000212158	SNORD66	HBII-142	small nucleolar RNA, C/D box 66	snoRNA
3125	chr21	31394267	31394856	+	11	NA	intron (NM_001353690, intron 1 of 27)	L1MC1|LINE|L1	-50207	NM_001353694	7074		NM_003253	ENSG00000156299	TIAM1	NEDLDS|TIAM-1	TIAM Rac1 associated GEF 1	protein-coding
4723	chr4	56164536	56165588	+	11	NA	Intergenic	Intergenic	-5133	NM_020722	57482		NM_020722	ENSG00000109265	CRACD	CRAD|KIAA1211	capping protein inhibiting regulator of actin dynamics	protein-coding
2181-3	chr12	57219845	57220188	+	11	NA	intron (NM_007224, intron 1 of 1)	intron (NM_007224, intron 1 of 1)	3222	NM_007224	11247		NM_007224	ENSG00000182379	NXPH4	NPH4	neurexophilin 4	protein-coding
2633	chr1	43850756	43851137	+	11	NA	intron (NM_001270466, intron 4 of 4)	intron (NM_001270466, intron 4 of 4)	12324	NR_106727	102464830		NR_106727	ENSG00000283477	MIR6079	hsa-mir-6079	microRNA 6079	ncRNA
3460	chr12	47751306	47751647	+	11	NA	exon (NM_001098531, exon 5 of 28)	exon (NM_001098531, exon 5 of 28)	6922	NM_001098532	10411		NM_006105	ENSG00000079337	RAPGEF3	CAMP-GEFI|EPAC|EPAC1|HSU79275|bcm910	Rap guanine nucleotide exchange factor 3	protein-coding
5329	chr15	85134210	85135062	+	11	NA	intron (NM_173454, intron 19 of 20)	intron (NM_173454, intron 19 of 20)	100145	NR_158179	101929479		NR_158179		LOC101929479	-	golgin A2 pseudogene	pseudo
2216-3	chr14	64764694	64765016	+	11	NA	intron (NM_001355436, intron 32 of 35)	intron (NM_001355436, intron 32 of 35)	20831	NR_107009	102465841		NR_107009	ENSG00000284269	MIR7855	hsa-mir-7855	microRNA 7855	ncRNA
2816-3	chr18	28162519	28163004	+	11	NA	intron (NM_001792, intron 1 of 15)	MIR|SINE|MIR	14369	NM_001792	1000		NM_001792	ENSG00000170558	CDH2	ACOGS|ADHD8|ARVD14|CD325|CDHN|CDw325|NCAD	cadherin 2	protein-coding
2683-2	chr3	54966744	54967274	+	11	NA	promoter-TSS (NM_001304389)	promoter-TSS (NM_001304389)	93	NM_001304389	57408		NM_020678	ENSG00000144771	LRTM1	HT017	leucine rich repeats and transmembrane domains 1	protein-coding
2823	chr16	67646462	67646600	+	11	NA	intron (NM_001317026, intron 6 of 37)	intron (NM_001317026, intron 6 of 37)	1387	NM_001013838	146206		NM_001013838	ENSG00000159753	CARMIL2	CARMIL2b|IMD58|LRRC16C|RLTPR	capping protein regulator and myosin 1 linker 2	protein-coding
2752-2	chr17	45019418	45019902	+	11	NA	Intergenic	Intergenic	31972	NM_001288655	79877		NM_024819	ENSG00000172992	DCAKD	-	dephospho-CoA kinase domain containing	protein-coding
2872-2	chr6_GL000254v2_alt	2502091	2502609	+	11	NA	promoter-TSS (NM_007109).3	promoter-TSS (NM_007109).3	-4	NM_019052	54535		NM_019052	ENSG00000204536	CCHCR1	C6orf18|HCR|SBP|pg8	coiled-coil alpha-helical rod protein 1	protein-coding
3645-3	chr7	76482631	76483195	+	11	NA	exon (NM_001102596, exon 2 of 8)	exon (NM_001102596, exon 2 of 8)	2403	NM_001102596	113878		NM_020892	ENSG00000091073	DTX2	RNF58	deltex E3 ubiquitin ligase 2	protein-coding
1996-8	chr21	37458530	37459043	+	11	NA	intron (NM_101395, intron 3 of 12)	intron (NM_101395, intron 3 of 12)	38487	NM_130438	1859		NM_001396	ENSG00000157540	DYRK1A	DYRK|DYRK1|HP86|MNB|MNBH|MRD7	dual specificity tyrosine phosphorylation regulated kinase 1A	protein-coding
2500-2	chr3	65979688	65980107	+	11	NA	intron (NM_001033057, intron 1 of 22)	MamSINE1|SINE|tRNA-RTE	-25339	NR_145422	151877		NR_145422	ENSG00000272610	MAGI1-IT1	-	MAGI1 intronic transcript 1	ncRNA
2360	chr1	1247424	1247912	+	11	NA	promoter-TSS (NM_001014980)	promoter-TSS (NM_001014980)	-946	NM_001014980	388581		NM_001014980	ENSG00000184163	C1QTNF12	C1QDC2|CTRP12|FAM132A	C1q and TNF related 12	protein-coding
2257-2	chr17	81637116	81637440	+	11	NA	promoter-TSS (NM_017921)	promoter-TSS (NM_017921)	82	NM_031945	83882		NM_031945	ENSG00000182612	TSPAN10	OCSP	tetraspanin 10	protein-coding
1915-2	chr10	72744504	72744845	+	11	NA	intron (NR_073062, intron 3 of 9)	intron (NR_073062, intron 3 of 9)	23645	NR_039823	100616286		NR_039823	ENSG00000266719	MIR4676	-	microRNA 4676	ncRNA
4555	chr9	76658444	76659186	+	11	NA	intron (NM_001308047, intron 9 of 17)	intron (NM_001308047, intron 9 of 17)	33600	NM_001330680	158471		NM_015225	ENSG00000106772	PRUNE2	BMCC1|BNIPXL|C9orf65|KIAA0367	prune homolog 2 with BCH domain	protein-coding
3950-2	chr11	71999718	72000353	+	11	NA	intron (NM_173044, intron 2 of 5)	intron (NM_173044, intron 2 of 5)	108	NM_001145055	10068		NM_005699	ENSG00000137496	IL18BP	FVH|IL18BPa	interleukin 18 binding protein	protein-coding
2938	chr19	3093723	3094227	+	11	NA	promoter-TSS (NM_002067)	promoter-TSS (NM_002067)	-387	NM_002067	2767		NM_002067	ENSG00000088256	GNA11	FBH|FBH2|FHH2|GNA-11|HG1K|HHC2|HYPOC2	G protein subunit alpha 11	protein-coding
3054-4	chr9	127503855	127504570	+	11	NA	TTS (NM_001005374)	TTS (NM_001005374)	51957	NM_001005374	90678		NM_138361	ENSG00000148356	LRSAM1	CMT2P|RIFLE|TAL	leucine rich repeat and sterile alpha motif containing 1	protein-coding
3123	chr16	89195578	89196015	+	11	NA	TTS (NM_001366322)	TTS (NM_001366322)	4741	NM_001384769	146429		NM_001242757	ENSG00000259803	SLC22A31	-	solute carrier family 22 member 31	protein-coding
3543	chr2	11152685	11153379	+	11	NA	Intergenic	MIRb|SINE|MIR	-2340	NM_001282710	130814		NM_152391	ENSG00000162976	SLC66A3	C2orf22|PQLC3	solute carrier family 66 member 3	protein-coding
3666-6	chr9	99859299	99859908	+	11	NA	intron (NM_173200, intron 8 of 8)	intron (NM_173200, intron 8 of 8)	37718	NM_173199	8013		NM_006981	ENSG00000119508	NR4A3	CHN|CSMF|MINOR|NOR1	nuclear receptor subfamily 4 group A member 3	protein-coding
1751-7	chr21	21087446	21087916	+	11	NA	intron (NM_001352595, intron 1 of 14)	intron (NM_001352595, intron 1 of 14)	-59481	NM_001352597	4685		NM_004540	ENSG00000154654	NCAM2	NCAM21	neural cell adhesion molecule 2	protein-coding
2763-4	chr2	38947375	38947871	+	11	NA	intron (NM_001145451, intron 10 of 17)	AluJr|SINE|Alu	12721	NR_028386	375196		NR_028386	ENSG00000269210	LOC375196	-	uncharacterized LOC375196	ncRNA
4060-2	chr19	33580160	33580990	+	11	NA	Intergenic	Intergenic	-41378	NM_001127896	64377		NM_022467	ENSG00000124302	CHST8	GALNAC4ST1|GalNAc4ST|PSS3	carbohydrate sulfotransferase 8	protein-coding
2677-4	chr6	149864410	149864876	+	11	NA	promoter-TSS (NM_032832)	promoter-TSS (NM_032832)	-284	NM_032832	84918		NM_032832	ENSG00000120256	LRP11	MANSC3|bA350J20.3	LDL receptor related protein 11	protein-coding
1868-3	chr2	212940912	212941156	+	11	NA	Intergenic	Intergenic	-14698	NR_039936	100616472		NR_039936	ENSG00000283637	MIR4776-2	mir-4776-2	microRNA 4776-2	ncRNA
3311-4	chr4	22486960	22487627	+	11	NA	intron (NM_145290, intron 1 of 18)	MER1B|DNA|hAT-Charlie	-28019	NR_162129	113219450		NR_162129		MIR12115	-	microRNA 12115	ncRNA
2516-3	chr12	53492147	53492652	+	11	NA	intron (NM_006301, intron 1 of 14)	intron (NM_006301, intron 1 of 14)	7059	NM_001193511	7786		NM_006301	ENSG00000139625	MAP3K12	DLK|HP09298|MEKK12|MUK|ZPK|ZPKP1	mitogen-activated protein kinase kinase kinase 12	protein-coding
2864-2	chr18	42525941	42526318	+	11	NA	intron (NR_046454, intron 6 of 6)	intron (NR_046454, intron 6 of 6)	339461	NR_046454	284260		NR_046174	ENSG00000267586	LINC00907	-	long intergenic non-protein coding RNA 907	ncRNA
6166	chr13	79806964	79807022	+	11	NA	Intergenic	Intergenic	2607	NR_125785	102724076		NR_125785	ENSG00000229011	LINC01038	-	long intergenic non-protein coding RNA 1038	ncRNA
3111	chr7	43175540	43176086	+	11	NA	intron (NM_015052, intron 2 of 29)	intron (NM_015052, intron 2 of 29)	24918	NR_037508	100500829		NR_037508	ENSG00000264069	MIR3943	-	microRNA 3943	ncRNA
2532	chr1	12208995	12209491	+	11	NA	TTS (NM_001066)	TTS (NM_001066)	17530	NR_039775	100616438		NR_039775	ENSG00000263676	MIR4632	-	microRNA 4632	ncRNA
2941-2	chr14	91271750	91272322	+	11	NA	3' UTR (NM_001080414, exon 30 of 30)	3' UTR (NM_001080414, exon 30 of 30)	-18156	NM_001348437	8111		NM_003485	ENSG00000119714	GPR68	AI2A6|GPR12A|OGR1	G protein-coupled receptor 68	protein-coding
3352	chr6	36228478	36228753	+	11	NA	intron (NM_015695, intron 11 of 12)	intron (NM_015695, intron 11 of 12)	-14553	NM_173676	285848		NM_173676	ENSG00000180316	PNPLA1	ARCI10|dJ50J22.1	patatin like phospholipase domain containing 1	protein-coding
2432	chr1	35178359	35178692	+	10	NA	intron (NR_136702, intron 9 of 11)	intron (NR_136702, intron 9 of 11)	14620	NR_136703	6421		NM_005066	ENSG00000116560	SFPQ	POMP100|PPP1R140|PSF	splicing factor proline and glutamine rich	protein-coding
2803	chr1	31875639	31876165	+	10	NA	Intergenic	AluSq2|SINE|Alu	-59851	NM_144569	90853		NM_144569	ENSG00000134668	SPOCD1	PPP1R146	SPOC domain containing 1	protein-coding
3461	chr18	35580713	35581379	+	10	NA	promoter-TSS (NM_001384442)	promoter-TSS (NM_001384442)	124	NM_001384438	2589		NM_020474	ENSG00000141429	GALNT1	GALNAC-T1	polypeptide N-acetylgalactosaminyltransferase 1	protein-coding
2871-3	chr19	5665807	5666347	+	10	NA	intron (NM_001320571, intron 15 of 18)	intron (NM_001320571, intron 15 of 18)	14161	NM_001365761	125988		NM_205767	ENSG00000174917	MICOS13	C19orf70|MIC12|MIC13|P117|QIL1	mitochondrial contact site and cristae organizing system subunit 13	protein-coding
1905-2	chr3	127036080	127036529	+	10	NA	3' UTR (NM_032242, exon 31 of 31)	3' UTR (NM_032242, exon 31 of 31)	47710	NM_032242	5361		NM_032242	ENSG00000114554	PLXNA1	DWOPNED|NOV|NOVP|PLEXIN-A1|PLXN1	plexin A1	protein-coding
4879	chr21	44910300	44911366	+	10	NA	intron (NM_001127491, intron 1 of 15)	intron (NM_001127491, intron 1 of 15)	10066	NM_000211	3689		NM_000211	ENSG00000160255	ITGB2	CD18|LAD|LCAMB|LFA-1|MAC-1|MF17|MFI7	integrin subunit beta 2	protein-coding
3037-4	chr4	140027107	140027577	+	10	NA	intron (NM_018717, intron 1 of 4)	intron (NM_018717, intron 1 of 4)	-100673	NR_147610	101927516		NR_147610		LOC101927516	-	uncharacterized LOC101927516	ncRNA
1962-16	chr7	45069453	45070115	+	10	NA	intron (NM_001363458, intron 5 of 10)	intron (NM_001363458, intron 5 of 10)	19185	NM_001146334	23148		NM_001146334	ENSG00000136274	NACAD	-	NAC alpha domain containing	protein-coding
3563-3	chr12	120719254	120720020	+	10	NA	intron (NM_001080533, intron 4 of 4)	intron (NM_001080533, intron 4 of 4)	-3556	NR_039849	100616329		NR_039849	ENSG00000284143	MIR4700	mir-4700	microRNA 4700	ncRNA
5494	chr16	81652613	81653636	+	10	NA	intron (NM_030629, intron 4 of 20)	MIR|SINE|MIR	-12230	NR_045112	100129617		NR_045112		LOC100129617	-	uncharacterized LOC100129617	ncRNA
1736-9	chr22	39524534	39524851	+	10	NA	Intergenic	Intergenic	4128	NM_182810	468		NM_001675	ENSG00000128272	ATF4	CREB-2|CREB2|TAXREB67|TXREB	activating transcription factor 4	protein-coding
2389-4	chr2	1715636	1716185	+	10	NA	intron (NM_012293, intron 1 of 22)	intron (NM_012293, intron 1 of 22)	28605	NM_012293	7837		NM_012293	ENSG00000130508	PXDN	ASGD7|COPOA|D2S448|D2S448E|MG50|PRG2|PXN|VPO|hsPxd01	peroxidasin	protein-coding
1879-7	chr5	150488421	150488609	+	10	NA	Intergenic	Intergenic	-2523	NR_105061	102546298		NR_105061	ENSG00000254333	NDST1-AS1	-	NDST1 antisense RNA 1	ncRNA
2245-2	chr11	65977697	65978169	+	10	NA	intron (NM_005146, intron 17 of 19)	intron (NM_005146, intron 17 of 19)	16199	NM_005146	9092		NM_005146	ENSG00000175467	SART1	Ara1|HAF|HOMS1|SART1259|SNRNP110|Snu66	spliceosome associated factor 1, recruiter of U4/U6.U5 tri-snRNP	protein-coding
2039-6	chr2	96103279	96103287	+	10	NA	Intergenic	Intergenic	13288	NM_000682	151		NM_000682	ENSG00000274286	ADRA2B	ADRA2L1|ADRA2RL1|ADRARL1|ALPHA2BAR|FAME2|alpha-2BAR	adrenoceptor alpha 2B	protein-coding
1638-8	chr7	151303645	151303963	+	10	NA	Intergenic	CpG	-26655	NM_003078	6604		NM_003078	ENSG00000082014	SMARCD3	BAF60C|CRACD3|Rsc6p	SWI/SNF related, matrix associated, actin dependent regulator of chromatin, subfamily d, member 3	protein-coding
5445-3	chr9	74886740	74887820	+	10	NA	promoter-TSS (NM_001177311)	promoter-TSS (NM_001177311)	67	NM_001177311	140803		NM_017662	ENSG00000119121	TRPM6	CHAK2|HMGX|HOMG|HOMG1|HSH	transient receptor potential cation channel subfamily M member 6	protein-coding
1679-15	chr4	8034648	8034723	+	10	NA	intron (NM_001286688, intron 5 of 14)	(GGTG)n|Simple_repeat|Simple_repeat	-29304	NR_029511	407052		NR_029511	ENSG00000207807	MIR95	MIRN95|hsa-mir-95|miR-95	microRNA 95	ncRNA
2430-8	chr4	61541012	61541451	+	10	NA	intron (NM_001322402, intron 4 of 25)	intron (NM_001322402, intron 4 of 25)	339059	NM_001371342	23284		NM_015236	ENSG00000150471	ADGRL3	CIRL3|CL3|LEC3|LPHN3	adhesion G protein-coupled receptor L3	protein-coding
2908	chr3	184760870	184761015	+	10	NA	intron (NR_110043, intron 2 of 2)	intron (NR_110043, intron 2 of 2)	12213	NR_110043	101928992		NR_110043	ENSG00000229433	LINC02069	-	long intergenic non-protein coding RNA 2069	ncRNA
3970-2	chr4	1987025	1987028	+	10	NA	promoter-TSS (NR_030641)	promoter-TSS (NR_030641)	-549	NR_030641	100126332		NR_030641	ENSG00000284587	MIR943	MIRN943|hsa-mir-943	microRNA 943	ncRNA
2838	chr15	36882464	36883032	+	10	NA	intron (NR_024264, intron 1 of 6)	intron (NR_024264, intron 1 of 6)	3785	NR_024264	145845		NM_001101327	LOC145845	-	uncharacterized LOC145845	ncRNA
3574	chr11	27469198	27469219	+	10	NA	intron (NM_018490, intron 1 of 17)	intron (NM_018490, intron 1 of 17)	-2523	NR_131170	105376671		NR_131169	ENSG00000254862	LGR4-AS1	lnc-BBOX1-1	LGR4 antisense RNA 1	ncRNA
2382	chr1	40925331	40925748	+	10	NA	Intergenic	MLT1J|LTR|ERVL-MaLR	-54157	NM_001905	1503		NM_001905	ENSG00000171793	CTPS1	CTPS|GATD5|GATD5A|IMD24	CTP synthase 1	protein-coding
4242	chr9	92808542	92809639	+	10	NA	promoter-TSS (NR_026868)	promoter-TSS (NR_026868)	-521	NR_026868	138649		NM_001010925	ENSG00000291168	ANKRD19P	ANKRD19|bA526D8.2	ankyrin repeat domain 19, pseudogene	pseudo
2945-2	chr21	42650839	42651170	+	10	NA	Intergenic	MLT2B2|LTR|ERVL	-2617	NM_002606	5152		NM_002606	ENSG00000160191	PDE9A	HSPDE9A2	phosphodiesterase 9A	protein-coding
2051-8	chr5	113225525	113225975	+	10	NA	intron (NM_001085377, intron 3 of 18)	intron (NM_001085377, intron 3 of 18)	69188	NM_002387	4163		NM_002387	ENSG00000171444	MCC	MCC1	MCC regulator of WNT signaling pathway	protein-coding
2630-7	chr6	89412380	89412893	+	10	NA	promoter-TSS (NM_021244)	promoter-TSS (NM_021244)	-363	NM_021244	58528		NM_021244	ENSG00000025039	RRAGD	HOMG7|RAGD|bA11D8.2.1	Ras related GTP binding D	protein-coding
2863-4	chr8	138720105	138720361	+	10	NA	intron (NM_152888, intron 27 of 64)	LTR33|LTR|ERVL	193808	NM_152888	169044		NM_152888	ENSG00000169436	COL22A1	-	collagen type XXII alpha 1 chain	protein-coding
1897-4	chr17	2889517	2889735	+	10	NA	intron (NM_001100398, intron 2 of 23)	intron (NM_001100398, intron 2 of 23)	76269	NR_110818	101927911		NR_110818	ENSG00000262884	LOC101927911	-	uncharacterized LOC101927911	ncRNA
2623	chr10	1407299	1407636	+	10	NA	intron (NM_018702, intron 1 of 9)	intron (NM_018702, intron 1 of 9)	-119163	NR_033387	642394		NM_001098830	ENSG00000205696	ADARB2-AS1	C10orf109|NCRNA00168	ADARB2 antisense RNA 1	ncRNA
3112	chr10	5466455	5467043	+	10	NA	Intergenic	Intergenic	20140	NM_005863	10276		NM_005863	ENSG00000173848	NET1	ARHGEF8|NET1A	neuroepithelial cell transforming 1	protein-coding
3314	chr16	4351219	4351552	+	10	NA	promoter-TSS (NM_016069)	promoter-TSS (NM_016069)	-64	NM_016069	51025		NM_016069	ENSG00000217930	PAM16	CGI-136|MAGMAS|SMDMDM|TIM16|TIMM16	presequence translocase associated motor 16	protein-coding
2196-3	chr12	124554579	124555114	+	10	NA	intron (NM_001077261, intron 1 of 47)	intron (NM_001077261, intron 1 of 47)	12766	NM_006312	9612		NM_006312	ENSG00000196498	NCOR2	CTG26|N-CoR2|SMAP270|SMRT|SMRTE|SMRTE-tau|TNRC14|TRAC|TRAC-1|TRAC1	nuclear receptor corepressor 2	protein-coding
3398-2	chr9	136160173	136160934	+	10	NA	Intergenic	Intergenic	41121	NM_001363746	8022		NM_014564	ENSG00000107187	LHX3	CPHD3|LIM3|M2-LHX3	LIM homeobox 3	protein-coding
2848	chr1	1856976	1857036	+	10	NA	intron (NM_001282538, intron 1 of 9)	intron (NM_001282538, intron 1 of 9)	34081	NM_002074	2782		NM_002074	ENSG00000078369	GNB1	HG2A|MDS|MRD42	G protein subunit beta 1	protein-coding
1889-4	chr17	74961719	74962194	+	10	NA	exon (NM_030630, exon 6 of 19)	exon (NM_030630, exon 6 of 19)	-8733	NR_110878	102723641		NR_110878	ENSG00000263586	HID1-AS1	-	HID1 antisense RNA 1	ncRNA
2303	chr10	72000911	72001288	+	10	NA	intron (NM_004273, intron 1 of 2)	intron (NM_004273, intron 1 of 2)	36704	NM_004273	9469		NM_004273	ENSG00000122863	CHST3	C6ST|C6ST1|HSD	carbohydrate sulfotransferase 3	protein-coding
4937	chr11	65871524	65872524	+	10	NA	intron (NM_016938, intron 2 of 10)	intron (NM_016938, intron 2 of 10)	776	NR_037718	30008		NM_016938	ENSG00000172638	EFEMP2	ARCL1B|FBLN4|MBP1|UPH1	EGF containing fibulin extracellular matrix protein 2	protein-coding
1663-18	chr4	182641440	182641813	+	10	NA	intron (NM_001080477, intron 5 of 27)	AluSz6|SINE|Alu	275627	NM_001351745	1635		NM_001921	ENSG00000129187	DCTD	-	dCMP deaminase	protein-coding
2166-4	chr14	104781233	104781272	+	10	NA	intron (NM_001382433, intron 4 of 15)	intron (NM_001382433, intron 4 of 15)	12349	NM_005163	207		NM_005163	ENSG00000142208	AKT1	AKT|PKB|PKB-ALPHA|PRKBA|RAC|RAC-ALPHA	AKT serine/threonine kinase 1	protein-coding
1801-7	chr13	64704246	64704607	+	10	NA	Intergenic	LTR14B|LTR|ERVK	-628415	NR_145420	144766		NR_145420	ENSG00000227674	LINC00355	-	long intergenic non-protein coding RNA 355	ncRNA
3689-2	chr19	50380874	50381886	+	10	NA	intron (NM_001256647, intron 7 of 8)	L2a|LINE|L2	-2943	NM_001256849	5424		NM_002691	ENSG00000062822	POLD1	CDC2|CRCS10|MDPL|POLD	DNA polymerase delta 1, catalytic subunit	protein-coding
2254	chr1	15422940	15423378	+	10	NA	intron (NM_024329, intron 1 of 3)	intron (NM_024329, intron 1 of 3)	13271	NM_024329	79180		NM_024329	ENSG00000142634	EFHD2	SWS1	EF-hand domain family member D2	protein-coding
7743	chr2	61178772	61178951	+	10	NA	non-coding (NR_152212, exon 1 of 7)	non-coding (NR_152212, exon 1 of 7)	1443	NR_152210	130872		NM_152392	ENSG00000293434	AHSA2P	AHA1|AHSA2|Hch1	activator of HSP90 ATPase homolog 2, pseudogene	pseudo
2453-4	chr16_KI270855v1_alt	104872	105215	+	10	NA	intron (NM_001351729, intron 6 of 27).2	intron (NM_001351729, intron 6 of 27).2	13177	NM_001351729	79585		NM_024535	ENSG00000262246	CORO7	0610011B16Rik|CRN7|POD1	coronin 7	protein-coding
1877-3	chr12	92701833	92702217	+	10	NA	promoter-TSS (NM_001377329)	promoter-TSS (NM_001377329)	-818	NM_001037671	440107		NM_001004330	ENSG00000187510	PLEKHG7	C12orf74	pleckstrin homology and RhoGEF domain containing G7	protein-coding
3769-4	chr22	20129889	20129955	+	10	NA	Intergenic	Intergenic	-1882	NM_001185024	29801		NM_013373	ENSG00000099904	ZDHHC8	DHHC8|ZDHHCL1|ZNF378	zinc finger DHHC-type palmitoyltransferase 8	protein-coding
2096-2	chr1	227762138	227762686	+	10	NA	intron (NR_136654, intron 2 of 3)	intron (NR_136654, intron 2 of 3)	-24400	NR_168380	105373289		NR_168380	ENSG00000286389	LOC105373289	-	LOC105373289	ncRNA
2320-4	chr4	2402104	2402298	+	10	NA	intron (NM_020972, intron 1 of 12)	intron (NM_020972, intron 1 of 12)	16444	NM_001172656	57732		NM_020972	ENSG00000159733	ZFYVE28	LST2|LYST2|lst-2	zinc finger FYVE-type containing 28	protein-coding
4390	chr22	45974660	45974697	+	10	NA	intron (NM_058238, intron 1 of 3)	intron (NM_058238, intron 1 of 3)	2484	NM_058238	7477		NM_058238	ENSG00000188064	WNT7B	-	Wnt family member 7B	protein-coding
1895-8	chr3	32835932	32836237	+	10	NA	intron (NM_001039111, intron 1 of 3)	intron (NM_001039111, intron 1 of 3)	18087	NM_001039111	131405		NM_001039111	ENSG00000206557	TRIM71	HYC4|HYDCC1|LIN-41|LIN41	tripartite motif containing 71	protein-coding
1765-4	chr17	1958882	1959248	+	10	NA	intron (NM_178568, intron 1 of 1)	intron (NM_178568, intron 1 of 1)	-58651	NR_135642	105371485		NR_135642	ENSG00000228133	LOC105371485	-	uncharacterized LOC105371485	ncRNA
3027-5	chr5	74316024	74316769	+	10	NA	Intergenic	Intergenic	-6090	NR_105010	101929082		NR_105010	ENSG00000249343	LINC01333	-	long intergenic non-protein coding RNA 1333	ncRNA
3019-2	chr16	57696350	57696957	+	10	NA	intron (NM_001289162, intron 2 of 18)	intron (NM_001289162, intron 2 of 18)	1847	NM_001289163	84229		NM_032269	ENSG00000159625	DRC7	C16orf50|CCDC135|CFAP50|FAP50	dynein regulatory complex subunit 7	protein-coding
1702-17	chr8	59040400	59040957	+	10	NA	intron (NM_014729, intron 1 of 8)	intron (NM_014729, intron 1 of 8)	78469	NM_014729	9760		NM_014729	ENSG00000198846	TOX	TOX1	thymocyte selection associated high mobility group box	protein-coding
4057	chr1	31436623	31437456	+	10	NA	Intergenic	Intergenic	23226	NM_018565	347735		NM_018565	ENSG00000168528	SERINC2	FKSG84|PRO0899|TDE2|TDE2L	serine incorporator 2	protein-coding
2657-2	chr13	40564368	40565053	+	10	NA	intron (NM_002015, intron 1 of 2)	intron (NM_002015, intron 1 of 2)	-83704	NR_024506	646982		NR_024505	ENSG00000215483	LINC00598	lncFOXO1	long intergenic non-protein coding RNA 598	ncRNA
2053-6	chr22	41237388	41237862	+	10	NA	exon (NM_138481, exon 3 of 6)	exon (NM_138481, exon 3 of 6)	3306	NM_138481	150356		NM_138481	ENSG00000100399	CHADL	SLRR4B	chondroadherin like	protein-coding
4212	chr1	16398540	16399231	+	10	NA	TTS (NR_073501)	TTS (NR_073501)	31643	NR_073502	26099		NM_001114600	ENSG00000055070	SZRD1	C1orf144	SUZ RNA binding domain containing 1	protein-coding
2969-3	chr15	31157204	31157995	+	10	NA	intron (NM_001252020, intron 1 of 26).2	intron (NM_001252020, intron 1 of 26).2	3674	NM_001252020	4308		NM_002420	ENSG00000134160	TRPM1	CSNB1C|LTRPC1|MLSN1	transient receptor potential cation channel subfamily M member 1	protein-coding
3269	chr11	62921662	62922427	+	10	NA	promoter-TSS (NM_000738)	promoter-TSS (NM_000738)	-681	NM_000738	1128		NM_000738	ENSG00000168539	CHRM1	HM1|M1|M1R	cholinergic receptor muscarinic 1	protein-coding
3145-2	chr17	44041632	44042081	+	10	NA	intron (NM_001369486, intron 1 of 3)	intron (NM_001369486, intron 1 of 3)	-18705	NM_001304813	84336		NM_032376	ENSG00000091947	TMEM101	-	transmembrane protein 101	protein-coding
1461-3	chr11	11966798	11967073	+	10	NA	intron (NM_001018057, intron 5 of 6)	intron (NM_001018057, intron 5 of 6)	41704	NM_001018057	27122		NM_013253	ENSG00000050165	DKK3	CRRL|REIC|RIG	dickkopf WNT signaling pathway inhibitor 3	protein-coding
1930-9	chr8	37260609	37260714	+	10	NA	Intergenic	Intergenic	233252	NR_121620	100507420		NR_121620	ENSG00000253414	LINC01605	LincDUSP|ODIR1	long intergenic non-protein coding RNA 1605	ncRNA
3149	chr6	114440985	114441712	+	10	NA	Intergenic	Intergenic	-378471	NM_153612	222537		NM_153612	ENSG00000249853	HS3ST5	3-OST-5|3OST5|HS3OST5|NBLA04021	heparan sulfate-glucosamine 3-sulfotransferase 5	protein-coding
1697-4	chr3	32340171	32340458	+	10	NA	intron (NM_001320308, intron 1 of 2)	intron (NM_001320308, intron 1 of 2)	-51539	NM_138410	112616		NM_138410	ENSG00000153551	CMTM7	CKLFSF7	CKLF like MARVEL transmembrane domain containing 7	protein-coding
1615-3	chr12	109523146	109523352	+	10	NA	intron (NM_183415, intron 21 of 27)	intron (NM_183415, intron 21 of 27)	45615	NM_183415	89910		NM_130466	ENSG00000151148	UBE3B	BPIDS|KOS	ubiquitin protein ligase E3B	protein-coding
3332-2	chr8	27992361	27992793	+	10	NA	promoter-TSS (NM_173833)	promoter-TSS (NM_173833)	96	NM_173833	286133		NM_173833	ENSG00000168079	SCARA5	NET33|Tesr	scavenger receptor class A member 5	protein-coding
3100-2	chr22	33860372	33860991	+	10	NA	intron (NM_001362949, intron 1 of 15)	MIR|SINE|MIR	12648	NM_001378625	9215		NM_004737	ENSG00000133424	LARGE1	LARGE|MDC1D|MDDGA6|MDDGB6	LARGE xylosyl- and glucuronyltransferase 1	protein-coding
2149-2	chr16	85424934	85425382	+	10	NA	Intergenic	Intergenic	-118833	NR_049816	100847022		NR_049816	ENSG00000266307	MIR5093	-	microRNA 5093	ncRNA
1769-2	chr11	130313914	130314363	+	10	NA	promoter-TSS (NR_148980)	promoter-TSS (NR_148980)	574	NM_014155	29068		NM_014155	ENSG00000196323	ZBTB44	BTBD15|HSPC063|ZNF851	zinc finger and BTB domain containing 44	protein-coding
2571-6	chr6	7975329	7975575	+	10	NA	intron (NR_037616, intron 4 of 12)	intron (NR_037616, intron 4 of 12)	-10650	NR_027712	206426		NM_152700		PIP5K1P1	-	phosphatidylinositol-4-phosphate 5-kinase type 1 pseudogene 1	pseudo
2020-6	chr4	7938011	7938304	+	10	NA	promoter-TSS (NM_203423)	promoter-TSS (NM_203423)	-844	NM_203423	389199		NM_203423	ENSG00000228919	LOC389199	-	uncharacterized LOC389199	ncRNA
2590-5	chr4	48112128	48112507	+	10	NA	exon (NM_003328, exon 4 of 15)	exon (NM_003328, exon 4 of 15)	21933	NM_003328	7294		NM_003328	ENSG00000074966	TXK	BTKL|PSCTK5|PTK4|RLK|TKL	TXK tyrosine kinase	protein-coding
1891-2	chr1	53516052	53516390	+	10	NA	intron (NM_147193, intron 6 of 9)	intron (NM_147193, intron 6 of 9)	56822	NM_033067	63948		NM_033067	ENSG00000143006	DMRTB1	-	DMRT like family B with proline rich C-terminal 1	protein-coding
2722-4	chr8	90542866	90543575	+	10	NA	Intergenic	LTR16C|LTR|ERVL	62843	NR_104062	101937451		NR_104062	ENSG00000253799	LINC01030	-	long intergenic non-protein coding RNA 1030	ncRNA
1452-14	chr16	67758031	67758310	+	10	NA	intron (NM_001320238, intron 2 of 12)	intron (NM_001320238, intron 2 of 12)	-38854	NR_027398	81577		NM_030819	ENSG00000141098	GFOD2	-	Gfo/Idh/MocA-like oxidoreductase domain containing 2	protein-coding
1697-5	chr4	39341155	39341448	+	10	NA	intron (NM_001204747, intron 4 of 24)	intron (NM_001204747, intron 4 of 24)	25061	NM_001363496	5981		NM_002913	ENSG00000035928	RFC1	A1|CANVAS|MHCBFB|PO-GA|RECC1|RFC|RFC140	replication factor C subunit 1	protein-coding
1995-4	chr16	85371003	85371405	+	10	NA	Intergenic	G-rich|Low_complexity|Low_complexity	-64879	NR_049816	100847022		NR_049816	ENSG00000266307	MIR5093	-	microRNA 5093	ncRNA
2104-3	chr2	186588454	186588837	+	10	NA	Intergenic	AluJr4|SINE|Alu	-1411	NM_001145000	3685		NM_002210	ENSG00000138448	ITGAV	CD51|MSK8|VNRA|VTNR	integrin subunit alpha V	protein-coding
1935-2	chr12	132565408	132565712	+	10	NA	intron (NM_001382740, intron 5 of 11)	intron (NM_001382740, intron 5 of 11)	-16437	NR_106821	102465975		NR_106821	ENSG00000277052	MIR6763	hsa-mir-6763	microRNA 6763	ncRNA
2301	chr17	21000126	21000612	+	10	NA	3' UTR (NM_015276, exon 13 of 13)	3' UTR (NM_015276, exon 13 of 13)	42642	NM_015276	23326		NM_015276	ENSG00000124422	USP22	USP3L	ubiquitin specific peptidase 22	protein-coding
1710	chr1	6512985	6513295	+	10	NA	intron (NM_198681, intron 1 of 21)	intron (NM_198681, intron 1 of 21)	6952	NM_198681	57449		NM_020631	ENSG00000171680	PLEKHG5	ARHGEF45|CMTRIC|DSMA4|GEF720|HMNR4|Syx|Tech	pleckstrin homology and RhoGEF domain containing G5	protein-coding
2285-2	chr15	90225354	90225362	+	10	NA	exon (NM_001324030, exon 11 of 14)	exon (NM_001324030, exon 11 of 14)	8583	NM_006384	10519		NM_006384	ENSG00000185043	CIB1	CIB|CIBP|EV3|KIP1|PRKDCIP|SIP2-28	calcium and integrin binding 1	protein-coding
3503	chr10	78047388	78047719	+	10	NA	intron (NM_001142285, intron 4 of 4)	intron (NM_001142285, intron 4 of 4)	13690	NM_033022	6229		NM_001026	ENSG00000138326	RPS24	DBA3|S24|eS24	ribosomal protein S24	protein-coding
2590-3	chr21	46244562	46244710	+	10	NA	intron (NM_003906, intron 23 of 27)	intron (NM_003906, intron 23 of 27)	15405	NR_110566	114044		NM_018118	ENSG00000215424	MCM3AP-AS1	C21orf85|MCM3AP-AS|MCM3APAS|MCM3APASB|NCRNA00031	MCM3AP antisense RNA 1	ncRNA
2103-11	chr9	126662550	126663005	+	10	NA	intron (NM_001174147, intron 2 of 7)	intron (NM_001174147, intron 2 of 7)	48849	NM_002316	4010		NM_002316	ENSG00000136944	LMX1B	FSGS10|LMX1.2|NPS1	LIM homeobox transcription factor 1 beta	protein-coding
3321	chr17	82351329	82352409	+	10	NA	Intergenic	Intergenic	-7378	NM_207459	400629		NM_207459	ENSG00000182459	TEX19	-	testis expressed 19	protein-coding
3852	chr17	73117003	73117816	+	10	NA	Intergenic	MER5A1|DNA|hAT-Charlie	-24721	NM_001352691	201266		NM_139177	ENSG00000133195	SLC39A11	C17orf26|ZIP-11|ZIP11	solute carrier family 39 member 11	protein-coding
2516-7	chr3	116444835	116445247	+	10	NA	5' UTR (NM_002338, exon 1 of 7)	5' UTR (NM_002338, exon 1 of 7)	446	NM_001318915	4045		NM_002338	ENSG00000185565	LSAMP	IGLON3|LAMP	limbic system associated membrane protein	protein-coding
3483	chr16	67435302	67435945	+	10	NA	intron (NM_000196, intron 1 of 4)	intron (NM_000196, intron 1 of 4)	4502	NM_000196	3291		NM_000196	ENSG00000176387	HSD11B2	AME|AME1|HSD11K|HSD2|SDR9C3	hydroxysteroid 11-beta dehydrogenase 2	protein-coding
2311-2	chr13	79869184	79869686	+	10	NA	Intergenic	Intergenic	-3151	NR_120413	101927195		NR_120413	ENSG00000229175	LINC00382	TCONS_00021500	long intergenic non-protein coding RNA 382	ncRNA
2447-3	chr7	2775889	2776407	+	10	NA	intron (NM_001282441, intron 3 of 4)	AluJb|SINE|Alu	-13008	NM_001282440	2768		NM_007353	ENSG00000146535	GNA12	HG1M1|NNX3|RMP|gep	G protein subunit alpha 12	protein-coding
6498	chr19	41328356	41328942	+	10	NA	Intergenic	Intergenic	18172	NM_001346100	90324		NM_052848	ENSG00000142039	CCDC97	-	coiled-coil domain containing 97	protein-coding
3217-5	chr6	21103145	21103252	+	10	NA	intron (NM_017774, intron 12 of 15)	intron (NM_017774, intron 12 of 15)	408694	NR_103790	100874531		NR_103790	ENSG00000280989	LINC00581	linc-MBOAT1-4	long intergenic non-protein coding RNA 581	ncRNA
3189-2	chr1	183870020	183870674	+	10	NA	intron (NM_015149, intron 5 of 18)	MER48|LTR|ERV1	65227	NM_001297672	23179		NM_015149	ENSG00000143344	RGL1	RGL	ral guanine nucleotide dissociation stimulator like 1	protein-coding
1798-3	chr16	49836073	49836311	+	10	NA	intron (NM_001271620, intron 1 of 7)	intron (NM_001271620, intron 1 of 7)	-13454	NM_015069	23090		NM_015069	ENSG00000102935	ZNF423	Ebfaz|JBTS19|NPHP14|OAZ|Roaz|ZFP423|Zfp104|hOAZ	zinc finger protein 423	protein-coding
2589-4	chr17	40088282	40088480	+	10	NA	exon (NM_001190919, exon 8 of 10)	exon (NM_001190919, exon 8 of 10)	12208	NM_021724	9572		NM_021724	ENSG00000126368	NR1D1	EAR1|REVERBA|REVERBalpha|THRA1|THRAL|ear-1|hRev	nuclear receptor subfamily 1 group D member 1	protein-coding
2523-2	chr1	204028667	204028967	+	10	NA	Intergenic	Intergenic	12447	NR_027902	284573		NR_027902	ENSG00000176754	LINC00303	C1orf157|NCRNA00303	long intergenic non-protein coding RNA 303	ncRNA
5648	chr11	69499257	69500250	+	10	NA	Intergenic	Intergenic	14192	NR_120544	101928292		NR_120542		LINC01488	BRCAT8|CUPID1	long intergenic non-protein coding RNA 1488	ncRNA
4265	chr5	36693009	36693882	+	10	NA	Intergenic	Intergenic	86839	NM_001166695	6507		NM_004172	ENSG00000079215	SLC1A3	EA6|EAAT1|GLAST|GLAST1	solute carrier family 1 member 3	protein-coding
1963-6	chr21	43733806	43733853	+	10	NA	intron (NM_003681, intron 1 of 10)	intron (NM_003681, intron 1 of 10)	-7657	NM_001331030	8566		NM_003681	ENSG00000160209	PDXK	C21orf124|C21orf97|HEL-S-1a|HMSN6C|PKH|PNK|PRED79	pyridoxal kinase	protein-coding
8062	chr20	62315766	62316453	+	10	NA	intron (NM_005560, intron 57 of 79)	intron (NM_005560, intron 57 of 79)	13112	NM_007002	11047		NM_007002	ENSG00000130706	ADRM1	ARM-1|ARM1|GP110|PSMD16	ADRM1 26S proteasome ubiquitin receptor	protein-coding
1897-6	chr3	13419191	13419571	+	10	NA	intron (NM_024923, intron 1 of 39)	intron (NM_024923, intron 1 of 39)	941	NM_024923	23225		NM_024923	ENSG00000132182	NUP210	GP210|POM210	nucleoporin 210	protein-coding
2335-3	chr20	49706711	49707064	+	10	NA	intron (NM_004776, intron 1 of 8)	intron (NM_004776, intron 1 of 8)	6991	NM_004776	9334		NM_004776	ENSG00000158470	B4GALT5	B4Gal-T5|BETA4-GALT-IV|beta4Gal-T5|beta4GalT-V|gt-V	beta-1,4-galactosyltransferase 5	protein-coding
1996-10	chr5	104644272	104644608	+	10	NA	Intergenic	Intergenic	-455034	NR_000039	9366		NM_004250	ENSG00000232159	RAB9BP1	RAB9P1	RAB9B, member RAS oncogene family pseudogene 1	pseudo
3201	chr6	16471487	16471938	+	10	NA	intron (NM_000332, intron 7 of 8)	intron (NM_000332, intron 7 of 8)	233125	NM_006877	2766		NM_006877	ENSG00000137198	GMPR	GMPR 1|GMPR1	guanosine monophosphate reductase	protein-coding
2005-2	chr1	54584883	54585189	+	10	NA	intron (NM_015547, intron 2 of 16)	intron (NM_015547, intron 2 of 16)	36808	NM_147161	26027		NM_015547	ENSG00000162390	ACOT11	BFIT|STARD14|THEA|THEM1	acyl-CoA thioesterase 11	protein-coding
3079	chr10	132793216	132793402	+	10	NA	Intergenic	Intergenic	-7162	NM_177400	84504		NM_177400	ENSG00000148826	NKX6-2	GTX|NKX6.2|NKX6B|SPAX8	NK6 homeobox 2	protein-coding
3021-4	chr9	127495809	127496599	+	10	NA	intron (NR_168892, intron 23 of 25)	intron (NR_168892, intron 23 of 25)	43949	NM_001005374	90678		NM_138361	ENSG00000148356	LRSAM1	CMT2P|RIFLE|TAL	leucine rich repeat and sterile alpha motif containing 1	protein-coding
2333-6	chr5	172504081	172504519	+	10	NA	Intergenic	G-rich|Low_complexity|Low_complexity	-49775	NM_001017995	285590		NM_001017995	ENSG00000174705	SH3PXD2B	FAD49|FTHS|HOFI|KIAA1295|TKS4|TSK4	SH3 and PX domains 2B	protein-coding
4513	chr7	151125491	151126755	+	10	NA	intron (NM_001350103, intron 10 of 18)	CpG	11485	NM_001308305	116988		NM_031946	ENSG00000133612	AGAP3	AGAP-3|CENTG3|CRAG|MRIP-1|cnt-g3	ArfGAP with GTPase domain, ankyrin repeat and PH domain 3	protein-coding
1577-2	chr1	235893974	235894319	+	10	NA	Intergenic	MIRc|SINE|MIR	-10433	NR_102436	1130		NM_000081	ENSG00000143669	LYST	CHS|CHS1|Mauve	lysosomal trafficking regulator	protein-coding
2177-11	chr22	41434640	41435027	+	10	NA	3' UTR (NM_016272, exon 2 of 2)	3' UTR (NM_016272, exon 2 of 2)	11968	NM_016272	10766		NM_016272	ENSG00000183864	TOB2	APRO5|TOB4|TOBL|TROB2	transducer of ERBB2, 2	protein-coding
3373	chr11	114232398	114232960	+	10	NA	intron (NM_001354751, intron 4 of 6)	intron (NM_001354751, intron 4 of 6)	-25127	NM_001372047	4837		NM_006169	ENSG00000166741	NNMT	-	nicotinamide N-methyltransferase	protein-coding
4971	chr19	33521984	33522530	+	10	NA	promoter-TSS (NM_001166056)	promoter-TSS (NM_001166056)	-466	NM_001166057	5184		NM_000285	ENSG00000124299	PEPD	PROLIDASE	peptidase D	protein-coding
2546-6	chr9	124389227	124389811	+	10	NA	intron (NM_002799, intron 5 of 7)	intron (NM_002799, intron 5 of 7)	25923	NM_002799	5695		NM_002799	ENSG00000136930	PSMB7	-	proteasome 20S subunit beta 7	protein-coding
1931-5	chr19	18367040	18367429	+	10	NA	non-coding (NR_138029, exon 6 of 6)	non-coding (NR_138029, exon 6 of 6)	-18924	NM_004864	9518		NM_004864	ENSG00000130513	GDF15	GDF-15|HG|MIC-1|MIC1|NAG-1|PDF|PLAB|PTGFB	growth differentiation factor 15	protein-coding
3155	chr16	788617	789320	+	10	NA	promoter-TSS (NM_001324411)	promoter-TSS (NM_001324411)	348	NM_022092	63922		NM_022092	ENSG00000127586	CHTF18	C16orf41|C321D2.2|C321D2.3|C321D2.4|CHL12|Ctf18|RUVBL	chromosome transmission fidelity factor 18	protein-coding
4062	chr11	134741138	134741223	+	10	NA	intron (NR_147836, intron 1 of 1)	intron (NR_147836, intron 1 of 1)	5235	NR_147836	729305		NR_147836	ENSG00000251226	LINC02714	-	long intergenic non-protein coding RNA 2714	ncRNA
2778-4	chr7	45401198	45401510	+	10	NA	Intergenic	Intergenic	-172786	NM_001281768	107		NM_021116	ENSG00000164742	ADCY1	AC1|DFNB44	adenylate cyclase 1	protein-coding
2692	chr1	54584364	54584746	+	10	NA	intron (NM_015547, intron 1 of 16)	intron (NM_015547, intron 1 of 16)	36327	NM_147161	26027		NM_015547	ENSG00000162390	ACOT11	BFIT|STARD14|THEA|THEM1	acyl-CoA thioesterase 11	protein-coding
1900-6	chr19	4511512	4511907	+	10	NA	exon (NM_001367868, exon 5 of 8)	exon (NM_001367868, exon 5 of 8)	6777	NM_001367868	729359		NM_001080400	ENSG00000167676	PLIN4	KIAA1881|MDRV|MRUPAV|NIPA2|S3-12	perilipin 4	protein-coding
2576-2	chr17	41123441	41124140	+	10	NA	exon (NM_031854, exon 1 of 1)	exon (NM_031854, exon 1 of 1)	392	NM_031854	83755		NM_031854	ENSG00000213416	KRTAP4-12	KAP4.12|KRTAP4.12	keratin associated protein 4-12	protein-coding
3811	chr11	117181043	117181906	+	10	NA	exon (NM_001040455, exon 2 of 26)	exon (NM_001040455, exon 2 of 26)	2731	NM_001040455	51092		NM_015996	ENSG00000149577	SIDT2	CGI-40	SID1 transmembrane family member 2	protein-coding
2300-3	chr16	85396968	85397005	+	10	NA	Intergenic	Intergenic	-90661	NR_049816	100847022		NR_049816	ENSG00000266307	MIR5093	-	microRNA 5093	ncRNA
2361-6	chrX	154348708	154349037	+	10	NA	exon (NM_001456, exon 47 of 47)	exon (NM_001456, exon 47 of 47)	25762	NM_001110556	2316		NM_001456	ENSG00000196924	FLNA	ABP-280|ABPX|CSBS|CVD1|FGS2|FLN|FLN-A|FLN1|FMD|MNS|NHBP|OPD|OPD1|OPD2|XLVD|XMVD	filamin A	protein-coding
2922	chr20	45415982	45416714	+	10	NA	intron (NR_047695, intron 1 of 8)	CpG	207	NR_047691	51604		NM_015937	ENSG00000124155	PIGT	CGI-06|MCAHS3|NDAP|PIG-T|PNH2	phosphatidylinositol glycan anchor biosynthesis class T	protein-coding
2105-7	chr2	159178310	159178651	+	10	NA	intron (NM_001350064, intron 13 of 26)	intron (NM_001350064, intron 13 of 26)	-8355	NR_106948	102465535		NR_106948	ENSG00000275141	MIR6888	hsa-mir-6888	microRNA 6888	ncRNA
2628-2	chr17	1469371	1469657	+	10	NA	intron (NM_001080779, intron 25 of 31)	intron (NM_001080779, intron 25 of 31)	-13282	NM_016823	1398		NM_005206	ENSG00000167193	CRK	CRKII|p38	CRK proto-oncogene, adaptor protein	protein-coding
3605-2	chr20	1895451	1896319	+	10	NA	intron (NM_001330728, intron 2 of 8)	intron (NM_001330728, intron 2 of 8)	478	NM_001040023	140885		NM_080792	ENSG00000198053	SIRPA	BIT|CD172A|MFR|MYD-1|P84|PTPNS1|SHPS1|SIRP	signal regulatory protein alpha	protein-coding
5334	chr16	83144616	83144672	+	10	NA	intron (NM_001220490, intron 3 of 12)	intron (NM_001220490, intron 3 of 12)	-154346	NR_110937	101928417		NR_110937	ENSG00000260832	LOC101928417	-	uncharacterized LOC101928417	ncRNA
5129	chr4	41256551	41257773	+	10	NA	promoter-TSS (NR_102709)	promoter-TSS (NR_102709)	234	NM_004181	7345		NM_004181	ENSG00000154277	UCHL1	HEL-117|HEL-S-53|NDGOA|PARK5|PGP 9.5|PGP9.5|PGP95|SPG79|SPG79A|UCHL-1|Uch-L1	ubiquitin C-terminal hydrolase L1	protein-coding
3448-3	chr15	40853090	40853652	+	10	NA	intron (NM_181642, intron 3 of 10)	intron (NM_181642, intron 3 of 10)	-8847	NR_146466	102724362		NR_146466	ENSG00000261183	SPINT1-AS1	-	SPINT1 antisense RNA 1	ncRNA
1969-6	chr3	50358501	50358904	+	10	NA	exon (NM_007024, exon 1 of 2)	exon (NM_007024, exon 1 of 2)	819	NM_007024	11070		NM_007024	ENSG00000126062	TMEM115	PL6	transmembrane protein 115	protein-coding
1614-2	chr11	66408312	66408689	+	10	NA	Intergenic	Intergenic	-12504	NM_001318804	266743		NM_178864	ENSG00000174576	NPAS4	Le-PAS|NXF|PASD10|bHLHe79	neuronal PAS domain protein 4	protein-coding
4334	chr1	155077473	155078256	+	10	NA	promoter-TSS (NM_004952)	promoter-TSS (NM_004952)	-973	NM_004952	1944		NM_004952	ENSG00000143590	EFNA3	EFL2|EPLG3|Ehk1-L|LERK3	ephrin A3	protein-coding
2930-6	chr5	133844908	133845596	+	10	NA	Intergenic	Intergenic	-68425	NR_131252	105664404		NR_131252	ENSG00000249073	WSPAR	LncTCF7|TCONS_00009511	WNT signaling pathway activating non-coding RNA	ncRNA
3400-3	chr7	65149953	65150419	+	10	NA	intron (NR_146905, intron 1 of 12)	intron (NR_146905, intron 1 of 12)	9156	NR_146906	285905		NM_182596	ENSG00000290545	INTS4P1	INTS4L1	integrator complex subunit 4 pseudogene 1	pseudo
3762-3	chr8_KI270816v1_alt	61734	62480	+	10	NA	exon (NM_001100878, exon 2 of 14)	exon (NM_001100878, exon 2 of 14)	705	NM_001100878	642475		NM_001100878	ENSG00000204839	MROH6	C8orf73	maestro heat like repeat family member 6	protein-coding
2544-3	chr8	29819414	29819662	+	10	NA	intron (NR_125817, intron 2 of 2)	intron (NR_125817, intron 2 of 2)	8966	NR_125817	101929470		NR_125817	ENSG00000248964	LOC101929470	-	uncharacterized LOC101929470	ncRNA
3780	chr19	3983426	3983630	+	10	NA	promoter-TSS (NR_002602)	promoter-TSS (NR_002602)	-956	NR_002602	26812		NR_002602	ENSG00000206775	SNORD37	RNU37|U37	small nucleolar RNA, C/D box 37	snoRNA
2577-4	chr5	32574490	32575124	+	10	NA	Intergenic	Intergenic	-10750	NM_006713	10923		NM_006713	ENSG00000113387	SUB1	P15|PC4|p14	SUB1 regulator of transcription	protein-coding
2509-4	chr8	49999335	49999811	+	10	NA	intron (NR_135798, intron 1 of 15)	L2a|LINE|L2	88166	NM_001287814	54212		NM_018967	ENSG00000147481	SNTG1	G1SYN|SYN4	syntrophin gamma 1	protein-coding
2744-2	chr16	78297078	78297878	+	10	NA	intron (NM_016373, intron 5 of 8)	intron (NM_016373, intron 5 of 8)	197824	NR_120436	51741		NM_016373	ENSG00000186153	WWOX	D16S432E|DEE28|EIEE28|FOR|FRA16D|HHCMA56|PRO0128|SCAR12|SDR41C1|WOX1	WW domain containing oxidoreductase	protein-coding
3969-4	chr22	50440645	50441075	+	10	NA	exon (NM_001365836, exon 24 of 26)	exon (NM_001365836, exon 24 of 26)	33418	NR_162128	113218480		NR_162128		MIR12114	-	microRNA 12114	ncRNA
2385-6	chr9	93059623	93059994	+	10	NA	intron (NM_001287007, intron 1 of 2)	MIRc|SINE|MIR	1107	NM_145006	203328		NM_145006	ENSG00000157303	SUSD3	-	sushi domain containing 3	protein-coding
2725	chr14	90519965	90520326	+	10	NA	Intergenic	MIRc|SINE|MIR	-2936	NR_135274	105370619		NR_135274		LOC105370619	-	uncharacterized LOC105370619	ncRNA
1849-8	chr2	55011057	55011312	+	10	NA	promoter-TSS (NM_007008)	promoter-TSS (NM_007008)	-912	NM_007008	57142		NM_007008	ENSG00000115310	RTN4	ASY|NI220/250|NOGO|NSP|NSP-CL|Nbla00271|Nbla10545|RTN-X|RTN4-A|RTN4-B1|RTN4-B2|RTN4-C	reticulon 4	protein-coding
6875	chr16	3065330	3067195	+	10	NA	intron (NM_001369587, intron 2 of 5)	FordPrefect|DNA|hAT-Tip100	478	NM_001012636	9235		NM_004221	ENSG00000008517	IL32	IL-32alpha|IL-32beta|IL-32delta|IL-32gamma|NK4|TAIF|TAIFa|TAIFb|TAIFc|TAIFd	interleukin 32	protein-coding
2282-7	chr6	27252655	27253156	+	10	NA	exon (NM_005865, exon 9 of 12)	exon (NM_005865, exon 9 of 12)	5204	NM_005865	10279		NM_005865	ENSG00000112812	PRSS16	TSSP	serine protease 16	protein-coding
2113-3	chr17	78943169	78943641	+	10	NA	Intergenic	Intergenic	-18018	NM_003255	7077		NM_003255	ENSG00000035862	TIMP2	CSC-21K|DDC8	TIMP metallopeptidase inhibitor 2	protein-coding
1786	chr1	8814936	8815288	+	10	NA	intron (NM_012102, intron 1 of 23)	intron (NM_012102, intron 1 of 23)	2528	NM_001042681	473		NM_012102	ENSG00000142599	RERE	ARG|ARP|ATN1L|DNB1|NEDBEH	arginine-glutamic acid dipeptide repeats	protein-coding
4329-2	chr9	95103183	95103991	+	10	NA	intron (NM_001243743, intron 14 of 14)	intron (NM_001243743, intron 14 of 14)	-17493	NR_036109	100422842		NR_036109	ENSG00000207617	MIR3074	mir-3074	microRNA 3074	ncRNA
2857-4	chr8	22601478	22602086	+	10	NA	exon (NM_001013842, exon 3 of 7)	exon (NM_001013842, exon 3 of 7)	2181	NM_001198827	541565		NM_173686	ENSG00000241852	C8orf58	-	chromosome 8 open reading frame 58	protein-coding
2350-2	chr1	235456470	235457005	+	10	NA	intron (NM_152490, intron 8 of 11)	intron (NM_152490, intron 8 of 11)	47715	NM_001277155	148789		NM_152490	ENSG00000162885	B3GALNT2	B3GalNAc-T2|MDDGA11	beta-1,3-N-acetylgalactosaminyltransferase 2	protein-coding
1871-8	chr5	133611166	133611567	+	10	NA	intron (NM_015082, intron 1 of 15)	CpG	1175	NM_015082	23105		NM_015082	ENSG00000053108	FSTL4	-	follistatin like 4	protein-coding
2338	chr16	68082459	68082657	+	10	NA	Intergenic	Intergenic	-2812	NM_173163	4775		NM_004555	ENSG00000072736	NFATC3	NF-AT4c|NFAT4|NFATX|n339260	nuclear factor of activated T cells 3	protein-coding
4508-2	chrX	78139231	78140016	+	10	NA	promoter-TSS (NM_015975)	promoter-TSS (NM_015975)	27	NM_015975	51616		NM_015975	ENSG00000187325	TAF9B	DN-7|DN7|TAF9L|TAFII31L|TFIID-31	TATA-box binding protein associated factor 9b	protein-coding
3289	chr10	110381458	110382344	+	10	NA	Intergenic	LTR33|LTR|ERVL	-76981	NM_005871	10285		NM_005871	ENSG00000119953	SMNDC1	SMNR|SPF30|TDRD16C	survival motor neuron domain containing 1	protein-coding
2320-5	chr6	17115906	17116272	+	10	NA	intron (NM_001190766, intron 2 of 4)	intron (NM_001190766, intron 2 of 4)	14039	NM_001190766	401236		NM_001190766	ENSG00000230873	STMND1	-	stathmin domain containing 1	protein-coding
3472	chr7	128356782	128357610	+	10	NA	intron (NM_001174164, intron 5 of 5)	intron (NM_001174164, intron 5 of 5)	4489	NM_001174164	401399		NM_001114726	ENSG00000224940	PRRT4	-	proline rich transmembrane protein 4	protein-coding
2483-2	chr1	39569165	39569897	+	10	NA	intron (NM_003819, intron 5 of 15)	intron (NM_003819, intron 5 of 15)	-2021	NR_002983	677834		NR_002983	ENSG00000201457	SNORA55	ACA55	small nucleolar RNA, H/ACA box 55	snoRNA
3086	chr16	71860229	71860791	+	10	NA	exon (NM_017530, exon 6 of 6)	exon (NM_017530, exon 6 of 6)	14534	NM_001137675	342371		NM_001137675	ENSG00000224470	ATXN1L	BOAT|BOAT1	ataxin 1 like	protein-coding
2878-3	chr21	43813382	43813776	+	10	NA	Intergenic	Intergenic	-1012	NR_026961	284837		NM_194310	ENSG00000215458	AATBC	-	apoptosis associated transcript in bladder cancer	ncRNA
3109-7	chr5	74281020	74281524	+	10	NA	Intergenic	Intergenic	27053	NR_105009	102503429		NR_105009		LINC01335	-	long intergenic non-protein coding RNA 1335	ncRNA
2025-7	chr6	167281709	167281853	+	10	NA	Intergenic	Intergenic	-9534	NM_001143947	54346		NM_018974	ENSG00000112494	UNC93A	Unc-93A|dJ366N23.1|dJ366N23.2	unc-93 homolog A	protein-coding
1718-10	chr19	18609661	18609860	+	10	NA	Intergenic	Intergenic	-2961	NM_004750	9244		NM_004750	ENSG00000006016	CRLF1	CISS|CISS1|CLF|CLF-1|NR6|zcytor5	cytokine receptor like factor 1	protein-coding
1530-3	chr10	103763382	103763706	+	10	NA	intron (NM_014631, intron 3 of 13)	intron (NM_014631, intron 3 of 13)	16765	NR_038940	100505839		NR_038940	ENSG00000280693	SH3PXD2A-AS1	-	SH3PXD2A antisense RNA 1	ncRNA
2077-7	chr18	45838104	45838129	+	10	NA	intron (NM_213602, intron 3 of 5)	CpG-12500	12441	NM_213602	284266		NM_213602	ENSG00000197046	SIGLEC15	CD33L3|HsT1361|SIGLEC-15	sialic acid binding Ig like lectin 15	protein-coding
1680-4	chr11	8726437	8726604	+	10	NA	intron (NM_001376506, intron 1 of 17)	MIRb|SINE|MIR	41081	NR_002977	677826		NR_002977	ENSG00000212607	SNORA3B	ACA3-2|SNORA45|SNORA45B	small nucleolar RNA, H/ACA box 3B	snoRNA
3177	chr17	1210181	1210918	+	10	NA	intron (NM_001322841, intron 1 of 22)	intron (NM_001322841, intron 1 of 22)	19173	NM_001322841	29		NM_001092	ENSG00000159842	ABR	MDB	ABR activator of RhoGEF and GTPase	protein-coding
1680-5	chr13	79374063	79374384	+	10	NA	intron (NM_022118, intron 3 of 20)	AluSz|SINE|Alu	31998	NM_001286632	64062		NM_018605	ENSG00000139746	RBM26	ARRS2|C13orf10|PPP1R132|PRO1777|SE70-2|ZC3H17	RNA binding motif protein 26	protein-coding
2225	chr1	66169337	66169685	+	10	NA	intron (NM_001037340, intron 1 of 14)	intron (NM_001037340, intron 1 of 14)	-118793	NR_123718	101927139		NR_123718	ENSG00000227466	PDE4B-AS1	-	PDE4B antisense RNA 1	ncRNA
3503-2	chr11	12193033	12193897	+	10	NA	intron (NR_144415, intron 2 of 26)	intron (NR_144415, intron 2 of 26)	29782	NR_106739	102466906		NR_106739	ENSG00000275373	MIR6124	hsa-mir-6124	microRNA 6124	ncRNA
2191-8	chr3	177343153	177343375	+	10	NA	Intergenic	Intergenic	48822	NR_047465	100820709		NR_047465	ENSG00000203645	LINC00501	-	long intergenic non-protein coding RNA 501	ncRNA
2730-2	chr6	34032834	34033485	+	10	NA	intron (NM_000841, intron 9 of 10)	intron (NM_000841, intron 9 of 10)	-33108	NR_031681	100302123		NR_031681	ENSG00000221697	MIR1275	MIRN1275|hsa-mir-1275|mir-1275	microRNA 1275	ncRNA
2094-3	chr16	13958593	13958991	+	10	NA	Intergenic	Intergenic	38638	NM_005236	2072		NM_005236	ENSG00000175595	ERCC4	ERCC11|FANCQ|RAD1|XFEPS|XPF	ERCC excision repair 4, endonuclease catalytic subunit	protein-coding
3573	chr22	41508545	41509452	+	10	NA	intron (NM_001098, intron 3 of 17)	intron (NM_001098, intron 3 of 17)	35472	NM_001018050	171568		NM_138338	ENSG00000100413	POLR3H	C25|RPC22.9|RPC8	RNA polymerase III subunit H	protein-coding
1627-9	chr7	1822701	1823180	+	10	NA	intron (NM_001304524, intron 16 of 16)	L1MD|LINE|L1	21313	NR_039799	100616160		NR_039799	ENSG00000265089	MIR4655	-	microRNA 4655	ncRNA
2340-2	chr17	17721115	17721790	+	10	NA	intron (NM_030665, intron 1 of 5)	L2a|LINE|L2	39994	NM_030665	10743		NM_017574	ENSG00000108557	RAI1	SMCR|SMS	retinoic acid induced 1	protein-coding
3900-2	chr8	144179402	144180287	+	10	NA	intron (NM_032450, intron 5 of 43)	intron (NM_032450, intron 5 of 43)	31199	NM_001288814	727957		NM_032450	ENSG00000179832	MROH1	HEATR7A	maestro heat like repeat family member 1	protein-coding
2863	chr1	156136789	156137210	+	10	NA	exon (NM_001257374, exon 8 of 13)	exon (NM_001257374, exon 8 of 13)	10829	NM_001257374	4000		NM_005572	ENSG00000160789	LMNA	CDCD1|CDDC|CMD1A|CMT2B1|EMD2|FPL|FPLD|FPLD2|HGPS|IDC|LDP1|LFP|LGMD1B|LMN1|LMNC|LMNL1|MADA|PRO1	lamin A/C	protein-coding
4440-3	chr19	1395040	1395690	+	10	NA	3' UTR (NM_001363602, exon 8 of 8)	3' UTR (NM_001363602, exon 8 of 8)	6177	NM_138924	2593		NM_000156	ENSG00000130005	GAMT	CCDS2|HEL-S-20|PIG2|TP53I2	guanidinoacetate N-methyltransferase	protein-coding
2060-2	chr20	57601167	57601401	+	10	NA	Intergenic	L2b|LINE|L2	19142	NM_001323966	81030		NM_030776	ENSG00000124256	ZBP1	C20orf183|DAI|DLM-1|DLM1	Z-DNA binding protein 1	protein-coding
2925	chr14	75969633	75970204	+	10	NA	intron (NM_001329939, intron 4 of 7)	L2|LINE|L2	12077	NM_001329938	7043		NM_003239	ENSG00000119699	TGFB3	ARVD|ARVD1|LDS5|RNHF|TGF-beta3	transforming growth factor beta 3	protein-coding
2675-3	chr19	17424710	17425194	+	10	NA	exon (NM_001304547, exon 10 of 10)	exon (NM_001304547, exon 10 of 10)	4905	NM_138401	93343		NM_138401	ENSG00000141971	MVB12A	CFBP|FAM125A	multivesicular body subunit 12A	protein-coding
2422-4	chr5	173236492	173237001	+	10	NA	Intergenic	CpG	-1540	NM_004387	1482		NM_004387	ENSG00000183072	NKX2-5	CHNG5|CSX|CSX1|HLHS2|NKX2.5|NKX2E|NKX4-1|VSD3	NK2 homeobox 5	protein-coding
2662-3	chr5	139395372	139395760	+	10	NA	promoter-TSS (NM_001161546)	promoter-TSS (NM_001161546)	-462	NM_001161546	389333		NM_001161546	ENSG00000228672	PROB1	C5orf65	proline rich basic protein 1	protein-coding
2118-6	chr2	111972987	111973011	+	10	NA	intron (NM_006343, intron 6 of 18)	intron (NM_006343, intron 6 of 18)	74392	NM_006343	10461		NM_006343	ENSG00000153208	MERTK	MER|RP38|Tyro12|c-Eyk|c-mer	MER proto-oncogene, tyrosine kinase	protein-coding
2653	chr10	5977481	5978061	+	10	NA	promoter-TSS (NM_002189)	promoter-TSS (NM_002189)	-160	NM_001256765	3601		NM_002189	ENSG00000134470	IL15RA	CD215	interleukin 15 receptor subunit alpha	protein-coding
2502-6	chr6	215790	216333	+	10	NA	Intergenic	MIR|SINE|MIR	-10577	NR_126020	285766		NM_001010885	ENSG00000263667	LINC03066	-	long intergenic non-protein coding RNA 3066	ncRNA
1475-18	chr7	113819350	113819714	+	10	NA	Intergenic	Intergenic	99477	NM_002711	5506		NM_002711	ENSG00000154415	PPP1R3A	GM|PP1G|PPP1R3	protein phosphatase 1 regulatory subunit 3A	protein-coding
2246-3	chr18	76391916	76392253	+	10	NA	intron (NM_014643, intron 3 of 6)	intron (NM_014643, intron 3 of 6)	-99568	NR_136504	101927989		NR_136504	ENSG00000265778	ZNF516-AS1	-	ZNF516 antisense RNA 1	ncRNA
5918	chr22	20182910	20183691	+	10	NA	Intergenic	MIRb|SINE|MIR	21618	NR_038460	284865		NR_038460	ENSG00000249923	LINC02891	lnc-RTN4R-1	long intergenic non-protein coding RNA 2891	ncRNA
2929	chr11	2420411	2421271	+	10	NA	intron (NM_014555, intron 3 of 23)	CpG	2204	NM_014555	29850		NM_014555	ENSG00000070985	TRPM5	LTRPC5|MTR1	transient receptor potential cation channel subfamily M member 5	protein-coding
4130	chr16	54512257	54513383	+	10	NA	Intergenic	Intergenic	-142121	NR_134923	100996345		NR_134922	ENSG00000261803	LINC02140	-	long intergenic non-protein coding RNA 2140	ncRNA
1783-8	chr9	132182414	132182633	+	10	NA	intron (NM_032536, intron 2 of 7)	intron (NM_032536, intron 2 of 7)	20465	NM_032536	84628		NM_032536	ENSG00000196358	NTNG2	LHLL9381|Lmnt2|NEDBASH|NTNG1|NetrinG2|bA479K20.1	netrin G2	protein-coding
2121-3	chr2	231599182	231599205	+	10	NA	Intergenic	Intergenic	6329	NM_152614	165100		NM_152614	ENSG00000177673	TEX44	C2orf57	testis expressed 44	protein-coding
3468-2	chr22	39448327	39449042	+	10	NA	Intergenic	Intergenic	-8328	NM_002409	4248		NM_002409	ENSG00000128268	MGAT3	GNT-III|GNT3	beta-1,4-mannosyl-glycoprotein 4-beta-N-acetylglucosaminyltransferase	protein-coding
2489-2	chr15	67093979	67094246	+	10	NA	intron (NM_005902, intron 1 of 8)	intron (NM_005902, intron 1 of 8)	28510	NM_005902	4088		NM_005902	ENSG00000166949	SMAD3	HSPC193|HsT17436|JV15-2|LDS1C|LDS3|MADH3|hMAD-3|hSMAD3|mad3	SMAD family member 3	protein-coding
2484	chr17	47687592	47688203	+	10	NA	Intergenic	Intergenic	-7367	NM_014726	9755		NM_014726	ENSG00000198933	TBKBP1	ProSAPiP2|SINTBAD	TBK1 binding protein 1	protein-coding
2582-4	chr7	158814728	158815270	+	10	NA	intron (NM_020728, intron 1 of 21)	intron (NM_020728, intron 1 of 21)	14510	NM_001367773	57488		NM_020728	ENSG00000117868	ESYT2	CHR2SYT|E-Syt2|FAM62B	extended synaptotagmin 2	protein-coding
1663-10	chr16	87765776	87766218	+	10	NA	promoter-TSS (NM_001351938)	promoter-TSS (NM_001351938)	-11	NM_001184856	54758		NM_017566	ENSG00000104731	KLHDC4	-	kelch domain containing 4	protein-coding
1670-18	chr2	109188851	109189010	+	10	NA	intron (NM_001099289, intron 1 of 9)	intron (NM_001099289, intron 1 of 9)	-47342	NR_036223	100422863		NR_036223	ENSG00000264934	MIR4265	-	microRNA 4265	ncRNA
2159-3	chr15	65354313	65354899	+	10	NA	intron (NM_004884, intron 2 of 13)	L2c|LINE|L2	23396	NM_004884	9543		NM_004884	ENSG00000174498	IGDCC3	HsT18880|PUNC	immunoglobulin superfamily DCC subclass member 3	protein-coding
2997-4	chr15_KI270850v1_alt	41783	42404	+	10	NA	intron (NR_045529, intron 23 of 23).2	intron (NR_045529, intron 23 of 23).2	17459	NM_001322400	647042		NM_001164465	ENSG00000278662	GOLGA6L10	GOLGA6L18	golgin A6 family like 10	protein-coding
2876-4	chr17	18961601	18961798	+	10	NA	intron (NM_152351, intron 5 of 14)	intron (NM_152351, intron 5 of 14)	9534	NM_001270648	125206		NM_152351	ENSG00000154025	SLC5A10	SGLT-5|SGLT5	solute carrier family 5 member 10	protein-coding
1980-6	chr3	188257761	188258187	+	10	NA	intron (NR_164692, intron 2 of 9)	intron (NR_164692, intron 2 of 9)	45078	NM_005578	4026		NM_005578	ENSG00000145012	LPP	-	LIM domain containing preferred translocation partner in lipoma	protein-coding
4107	chr17	82300942	82301666	+	10	NA	Intergenic	Intergenic	-8490	NR_135639	101929511		NR_135639	ENSG00000265692	LINC01970	-	long intergenic non-protein coding RNA 1970	ncRNA
1575-10	chr7	77685310	77685571	+	10	NA	intron (NR_134251, intron 1 of 3)	intron (NR_134251, intron 1 of 3)	10825	NR_134253	100505854		NR_038361	ENSG00000214293	APTR	RSBN1L-AS1	Alu-mediated CDKN1A/p21 transcriptional regulator	ncRNA
2216	chr1	203048973	203049207	+	10	NA	intron (NM_001304332, intron 12 of 28)	MIRb|SINE|MIR	22599	NM_001304332	8497		NM_015053	ENSG00000143847	PPFIA4	-	PTPRF interacting protein alpha 4	protein-coding
1725-10	chr5	99052794	99053056	+	10	NA	Intergenic	MSTC|LTR|ERVL-MaLR	123791	NR_036530	100289230		NR_036530	ENSG00000248489	LOC100289230	-	uncharacterized LOC100289230	ncRNA
2818-3	chr19	944850	944904	+	10	NA	intron (NM_005224, intron 3 of 8)	intron (NM_005224, intron 3 of 8)	18842	NM_005224	1820		NM_005224	ENSG00000116017	ARID3A	BRIGHT|DRIL1|DRIL3|E2FBP1	AT-rich interaction domain 3A	protein-coding
2471-5	chr3	134376155	134376774	+	10	NA	Intergenic	Intergenic	-1047	NM_001278683	51421		NM_016201	ENSG00000114019	AMOTL2	LCCP	angiomotin like 2	protein-coding
4727	chr17	17794341	17795633	+	10	NA	exon (NM_030665, exon 3 of 6)	exon (NM_030665, exon 3 of 6)	-15458	NR_024007	140771		NM_144774	ENSG00000226746	SMCR5	NCRNA00034	Smith-Magenis syndrome chromosome region, candidate 5	ncRNA
1874-7	chr2	219281496	219281765	+	10	NA	intron (NM_001039550, intron 3 of 9)	intron (NM_001039550, intron 3 of 9)	2264	NM_006736	3300		NM_006736	ENSG00000135924	DNAJB2	CMT2T|DSMA5|HMNR5|HSJ-1|HSJ1|HSPF3	DnaJ heat shock protein family (Hsp40) member B2	protein-coding
2058-7	chr4	89574270	89574724	+	10	NA	Intergenic	Intergenic	197237	NM_001375290	6622		NM_000345	ENSG00000145335	SNCA	NACP|PARK1|PARK4|PD1	synuclein alpha	protein-coding
2488-5	chr9	131309358	131309808	+	10	NA	TTS (NM_032728)	TTS (NM_032728)	19860	NM_032728	84814		NM_032728	ENSG00000160539	PLPP7	C9orf67|NET39|PPAPDC3	phospholipid phosphatase 7 (inactive)	protein-coding
2276-3	chr20	54066440	54066835	+	10	NA	intron (NM_001366296, intron 1 of 10)	MLT1A|LTR|ERVL-MaLR	1848	NR_039913	100616225		NR_039913	ENSG00000265595	MIR4756	-	microRNA 4756	ncRNA
2954-2	chr2	219519449	219519948	+	10	NA	intron (NM_182847, intron 1 of 8)	MER3|DNA|hAT-Charlie	5216	NM_018674	55515		NM_018674	ENSG00000072182	ASIC4	ACCN4|BNAC4	acid sensing ion channel subunit family member 4	protein-coding
2101-4	chr10	43227342	43227839	+	10	NA	intron (NM_145313, intron 1 of 12)	intron (NM_145313, intron 1 of 12)	2149	NM_001282862	221002		NM_145313	ENSG00000198915	RASGEF1A	CG4853	RasGEF domain family member 1A	protein-coding
2573-5	chr6	3565619	3566219	+	10	NA	Intergenic	Intergenic	-108869	NM_001382317	63027		NM_015482	ENSG00000137266	SLC22A23	C6orf85	solute carrier family 22 member 23	protein-coding
5558	chr7	73865149	73865996	+	10	NA	intron (NM_182504, intron 2 of 2)	intron (NM_182504, intron 2 of 2)	4413	NM_182504	135886		NM_182504	ENSG00000175877	TMEM270	WBSCR28	transmembrane protein 270	protein-coding
2999	chr15	41904726	41905256	+	10	NA	intron (NM_139265, intron 5 of 5)	intron (NM_139265, intron 5 of 5)	-10938	NM_016642	51332		NM_016642	ENSG00000137877	SPTBN5	BSPECV|HUBSPECV|HUSPECV	spectrin beta, non-erythrocytic 5	protein-coding
2849-3	chr15	75670350	75671023	+	10	NA	Intergenic	Intergenic	21679	NM_001318146	257364		NM_153271	ENSG00000173548	SNX33	SH3PX3|SH3PXD3C|SNX30	sorting nexin 33	protein-coding
1988-2	chr10	103801927	103802689	+	10	NA	intron (NM_014631, intron 1 of 13)	L2b|LINE|L2	53098	NM_014631	9644		NM_014631	ENSG00000107957	SH3PXD2A	FISH|SH3MD1|TKS5	SH3 and PX domains 2A	protein-coding
2690-9	chr7	108063704	108064036	+	10	NA	exon (NM_001318046, exon 22 of 34)	exon (NM_001318046, exon 22 of 34)	-60709	NM_002291	3912		NM_002291	ENSG00000091136	LAMB1	CLM|LIS5	laminin subunit beta 1	protein-coding
2411-3	chr15	40279602	40279937	+	10	NA	3' UTR (NM_001190479, exon 1 of 1)	3' UTR (NM_001190479, exon 1 of 1)	2817	NM_001190479	100131244		NM_001190479	ENSG00000230778	ANKRD63	-	ankyrin repeat domain 63	protein-coding
3182-2	chr13	32022093	32022891	+	10	NA	Intergenic	Intergenic	9147	NR_103839	100507099		NR_103839		FRY-AS1	-	FRY antisense RNA 1	ncRNA
3666	chr11	2581699	2581756	+	10	NA	intron (NM_181798, intron 6 of 15)	intron (NM_181798, intron 6 of 15)	118271	NR_002728	10984		NR_002728	ENSG00000269821	KCNQ1OT1	KCNQ1-AS2|KCNQ10T1|Kncq1|KvDMR1|KvLQT1-AS|LIT1|NCRNA00012	KCNQ1 opposite strand/antisense transcript 1	ncRNA
1890	chr1	164188924	164189170	+	10	NA	Intergenic	Intergenic	-370137	NM_002585	5087		NM_002585	ENSG00000185630	PBX1	CAKUHED	PBX homeobox 1	protein-coding
1448-18	chr22	50439491	50439674	+	10	NA	intron (NM_001351641, intron 19 of 23)	intron (NM_001351641, intron 19 of 23)	32140	NR_162128	113218480		NR_162128		MIR12114	-	microRNA 12114	ncRNA
1870	chr13	24746740	24747046	+	10	NA	Intergenic	CpG	-17276	NM_001184993	56163		NM_031277	ENSG00000132972	RNF17	Mmip-2|SPATA23|TDRD4	ring finger protein 17	protein-coding
1919-6	chr3	185270713	185270965	+	10	NA	Intergenic	LTR75B|LTR|ERVL	-12122	NM_001242314	9175		NM_004721	ENSG00000073803	MAP3K13	LZK|MEKK13|MLK	mitogen-activated protein kinase kinase kinase 13	protein-coding
2595	chr1	245241473	245241846	+	10	NA	intron (NM_018012, intron 2 of 14)	intron (NM_018012, intron 2 of 14)	-7142	NR_151721	111216275		NR_151721	ENSG00000232192	KIF26B-AS1	-	KIF26B antisense RNA 1	ncRNA
2146	chr1	1199076	1199430	+	10	NA	Intergenic	Intergenic	7339	NM_148902	8784		NM_004195	ENSG00000186891	TNFRSF18	AITR|CD357|ENERGEN|GITR|GITR-D	TNF receptor superfamily member 18	protein-coding
3042-2	chr6	15390045	15390575	+	10	NA	intron (NM_001267040, intron 2 of 17)	intron (NM_001267040, intron 2 of 17)	141455	NM_001267040	3720		NM_004973	ENSG00000008083	JARID2	DIDDF|JMJ	jumonji and AT-rich interaction domain containing 2	protein-coding
2327-4	chr2	216695544	216696088	+	10	NA	promoter-TSS (NM_000599)	promoter-TSS (NM_000599)	-267	NM_000599	3488		NM_000599	ENSG00000115461	IGFBP5	IBP5	insulin like growth factor binding protein 5	protein-coding
2220-5	chr17	18254033	18254446	+	10	NA	intron (NM_001256265, intron 5 of 28).2	intron (NM_001256265, intron 5 of 28).2	4499	NM_002018	2314		NM_002018	ENSG00000177731	FLII	CMD2J|FLI|FLIL|Fli1	FLII actin remodeling protein	protein-coding
3393-3	chr3	49002333	49002805	+	10	NA	exon (NM_177938, exon 4 of 9)	exon (NM_177938, exon 4 of 9)	-4822	NM_001320546	11180		NM_018031	ENSG00000178252	WDR6	Trm734	WD repeat domain 6	protein-coding
2042-3	chr19	4636468	4636828	+	10	NA	Intergenic	Intergenic	-2868	NM_152362	126282		NM_152362	ENSG00000185361	TNFAIP8L1	TIPE1	TNF alpha induced protein 8 like 1	protein-coding
3857-2	chr4	40564916	40565427	+	10	NA	intron (NM_001371114, intron 1 of 5)	intron (NM_001371114, intron 1 of 5)	-49186	NM_019027	54502		NM_019027	ENSG00000163694	RBM47	NET18	RNA binding motif protein 47	protein-coding
3101-4	chr16	1448919	1449600	+	10	NA	intron (NM_001114331, intron 17 of 23)	intron (NM_001114331, intron 17 of 23)	-4770	NM_001143980	645811		NM_001143980	ENSG00000197599	CCDC154	C16orf29	coiled-coil domain containing 154	protein-coding
1592-8	chr18	48848685	48848861	+	10	NA	intron (NM_014772, intron 10 of 11)	intron (NM_014772, intron 10 of 11)	94034	NM_001190823	4092		NM_005904	ENSG00000101665	SMAD7	CRCS3|MADH7|MADH8	SMAD family member 7	protein-coding
1725-2	chr11	69054372	69054658	+	10	NA	intron (NM_139075, intron 2 of 24)	intron (NM_139075, intron 2 of 24)	5583	NM_139075	219931		NM_139075	ENSG00000162341	TPCN2	SHEP10|TPC2	two pore segment channel 2	protein-coding
3738-3	chr20	33671012	33671326	+	10	NA	intron (NM_031232, intron 2 of 11)	intron (NM_031232, intron 2 of 11)	3259	NM_031232	63941		NM_031231	ENSG00000125967	NECAB3	APBA2BP|EFCBP3|NIP1|STIP3|SYTIP2|XB51|dJ63M2.4|dJ63M2.5	N-terminal EF-hand calcium binding protein 3	protein-coding
5393	chr11	65854951	65855430	+	10	NA	3' UTR (NM_005507, exon 4 of 4)	3' UTR (NM_005507, exon 4 of 4)	2990	NM_005507	1072		NM_005507	ENSG00000172757	CFL1	CFL|HEL-S-15|cofilin	cofilin 1	protein-coding
3534-2	chr17	48036993	48037618	+	10	NA	promoter-TSS (NR_029687)	promoter-TSS (NR_029687)	-58	NR_029687	406943		NR_029687	ENSG00000207947	MIR152	MIRN152|mir-152	microRNA 152	ncRNA
2633-5	chr22	21495644	21496160	+	10	NA	intron (NR_003700, intron 1 of 16)	intron (NR_003700, intron 1 of 16)	21589	NR_003700	375133		NR_003700	ENSG00000293427	PI4KAP2	-	phosphatidylinositol 4-kinase alpha pseudogene 2	pseudo
1784-3	chr12	109845166	109845487	+	10	NA	Intergenic	Intergenic	-11928	NM_021625	59341		NM_021625	ENSG00000111199	TRPV4	BCYM3|CMT2C|HMSN2C|OTRPC4|SMAL|SPSMA|SSQTL1|TRP12|VRL2|VROAC	transient receptor potential cation channel subfamily V member 4	protein-coding
2194-2	chr1	114755790	114756098	+	10	NA	intron (NM_001242891, intron 1 of 20)	L1MB3|LINE|L1	2040	NM_007158	7812		NM_007158	ENSG00000009307	CSDE1	D1S155E|UNR	cold shock domain containing E1	protein-coding
2530-3	chr4	7103394	7103825	+	10	NA	promoter-TSS (NR_027441)	promoter-TSS (NR_027441)	-233	NR_027441	730971		NR_027441		LINC02447	-	long intergenic non-protein coding RNA 2447	ncRNA
2404	chr12	63152012	63152480	+	10	NA	Intergenic	Intergenic	-1045	NM_000706	552		NM_000706	ENSG00000166148	AVPR1A	AVPR V1a|AVPR1|V1aR	arginine vasopressin receptor 1A	protein-coding
2177-9	chr22	20154055	20154504	+	10	NA	Intergenic	Intergenic	-3224	NM_001365892	388849		NM_001243537	ENSG00000234409	CCDC188	-	coiled-coil domain containing 188	protein-coding
3330-3	chr2	43082432	43082951	+	10	NA	Intergenic	Intergenic	19754	NR_151714	100506047		NR_151714		LINC02580	-	long intergenic non-protein coding RNA 2580	ncRNA
4713	chr11	107397106	107398045	+	10	NA	intron (NM_152434, intron 10 of 17)	L1PB1|LINE|L1	60271	NM_152434	143884		NM_152434	ENSG00000152404	CWF19L2	-	CWF19 like cell cycle control factor 2	protein-coding
5245	chr20	3804958	3806008	+	10	NA	non-coding (NR_136335, exon 17 of 17)	non-coding (NR_136335, exon 17 of 17)	-3011	NR_109859	101929125		NR_109859	ENSG00000275491	LINC01730	-	long intergenic non-protein coding RNA 1730	ncRNA
4534	chr3	43220883	43222102	+	10	NA	Intergenic	Intergenic	-65020	NM_001330750	54861		NM_017719	ENSG00000163788	SNRK	HSNFRK	SNF related kinase	protein-coding
2832-5	chr5	133867613	133868317	+	10	NA	Intergenic	Intergenic	-45712	NR_131252	105664404		NR_131252	ENSG00000249073	WSPAR	LncTCF7|TCONS_00009511	WNT signaling pathway activating non-coding RNA	ncRNA
3082-2	chr14	100892076	100892395	+	10	NA	intron (NR_146000, intron 1 of 50)	intron (NR_146000, intron 1 of 50)	2586	NR_146000	79104		NR_024149		MEG8	Bsr|Irm|LINC00024|NCRNA00024|Rian|SNHG23|SNHG24|lnc-MGC	maternally expressed 8, small nucleolar RNA host gene	ncRNA
2202-4	chr19	2434139	2434775	+	10	NA	TTS (NR_106958)	TTS (NR_106958)	543	NR_106958	102466806		NR_106958	ENSG00000283728	MIR7108	hsa-mir-7108	microRNA 7108	ncRNA
2291-12	chr9	98074280	98074574	+	10	NA	intron (NM_018946, intron 2 of 5)	intron (NM_018946, intron 2 of 5)	17695	NM_018946	54187		NM_018946	ENSG00000095380	NANS	HEL-S-100|SAS|SEMDCG|SEMDG	N-acetylneuraminate synthase	protein-coding
4626	chr2	43019286	43019338	+	10	NA	Intergenic	Intergenic	20231	NR_110585	102723854		NR_110585	ENSG00000231826	LINC01819	KPRT4|LINC02590	long intergenic non-protein coding RNA 1819	ncRNA
3759-2	chr5	160356598	160357180	+	10	NA	intron (NM_001366504, intron 1 of 3)	intron (NM_001366504, intron 1 of 3)	13737	NM_031908	114898		NM_031908	ENSG00000145861	C1QTNF2	CTRP2|zacrp2	C1q and TNF related 2	protein-coding
4746	chr7	110382738	110383286	+	10	NA	Intergenic	LTR22C2|LTR|ERVK	-422799	NR_003024	442720		NR_003024	ENSG00000237064	EIF3IP1	RG208K23	eukaryotic translation initiation factor 3 subunit I pseudogene 1	pseudo
3689	chr11	71286203	71286640	+	10	NA	Intergenic	L1MB3|LINE|L1	-33844	NM_012309	22941		NM_012309	ENSG00000162105	SHANK2	AUTS17|CORTBP1|CTTNBP1|ProSAP1|SHANK|SPANK-3	SH3 and multiple ankyrin repeat domains 2	protein-coding
3080	chr20	62119169	62119177	+	10	NA	Intergenic	Intergenic	-3302	NM_144703	149986		NM_014054	ENSG00000149657	LSM14B	C20orf40|FAM61B|FT005|LSM13|RAP55B|bA11M20.3	LSM family member 14B	protein-coding
3103	chr1	41394814	41395387	+	10	NA	Intergenic	Intergenic	-19431	NR_135817	101929901		NR_135817	ENSG00000229901	FOXO6-AS1	-	FOXO6 antisense RNA 1	ncRNA
3163-2	chr10	15359302	15359858	+	10	NA	intron (NM_001010924, intron 1 of 7)	MLT1E2|LTR|ERVL-MaLR	11709	NM_001010924	221061		NM_001010924	ENSG00000148468	FAM171A1	APCN|C10orf38	family with sequence similarity 171 member A1	protein-coding
2058-8	chr6	43907840	43908281	+	10	NA	intron (NR_024478, intron 1 of 1)	intron (NR_024478, intron 1 of 1)	17032	NR_024478	100132354		NR_024478	ENSG00000289313	LINC01512	HI-LNC77	long intergenic non-protein coding RNA 1512	ncRNA
2363-2	chr12	121518837	121519126	+	10	NA	intron (NM_001005366, intron 9 of 22)	intron (NM_001005366, intron 9 of 22)	61265	NM_001005366	84678		NM_032590	ENSG00000089094	KDM2B	CXXC2|FBXL10|Fbl10|JHDM1B|PCCX2	lysine demethylase 2B	protein-coding
2717-2	chr12	1742356	1742523	+	10	NA	intron (NM_001375364, intron 2 of 8).2	intron (NM_001375364, intron 2 of 8).2	51369	NM_001375364	79602		NM_024551	ENSG00000006831	ADIPOR2	ACDCR2|PAQR2	adiponectin receptor 2	protein-coding
4108	chr12	188896	189574	+	10	NA	TTS (NM_003044)	TTS (NM_003044)	-14410	NR_120475	101929384		NR_120475	ENSG00000256577	SLC6A12-AS1	-	SLC6A12 antisense RNA 1	ncRNA
3586	chr17_KI270861v1_alt	50549	52031	+	10	NA	intron (NM_152346, intron 2 of 13)	intron (NM_152346, intron 2 of 13)	7154	NM_001284498	124935		NM_152346	ENSG00000167703	SLC43A2	LAT4	solute carrier family 43 member 2	protein-coding
1843-10	chr4	24565797	24566078	+	10	NA	intron (NM_001358, intron 3 of 13)	MIR|SINE|MIR	18617	NM_001358	1665		NM_001358	ENSG00000109606	DHX15	DBP1|DDX15|PRP43|PRPF43|PrPp43p|hPrp43	DEAH-box helicase 15	protein-coding
2224-4	chr5	31888930	31889002	+	10	NA	intron (NM_178140, intron 2 of 24)	intron (NM_178140, intron 2 of 24)	47193	NR_036241	100422874		NR_036241	ENSG00000266243	MIR4279	-	microRNA 4279	ncRNA
2365-4	chr9	127489736	127490179	+	10	NA	intron (NM_001190723, intron 19 of 24)	intron (NM_001190723, intron 19 of 24)	37702	NM_001005374	90678		NM_138361	ENSG00000148356	LRSAM1	CMT2P|RIFLE|TAL	leucine rich repeat and sterile alpha motif containing 1	protein-coding
2671-2	chr3	27826660	27827118	+	10	NA	intron (NR_146630, intron 3 of 4)	intron (NR_146630, intron 3 of 4)	7247	NR_132438	100996624		NR_132438	ENSG00000229243	LINC01981	-	long intergenic non-protein coding RNA 1981	ncRNA
2104-4	chr3	71262876	71263146	+	10	NA	intron (NM_001012505, intron 5 of 6)	intron (NM_001012505, intron 5 of 6)	-17934	NM_001244814	27086		NM_032682	ENSG00000114861	FOXP1	12CC4|HSPC215|MFH|QRF1|hFKH1B	forkhead box P1	protein-coding
3547	chr1	12588321	12589004	+	10	NA	intron (NM_004753, intron 1 of 5)	intron (NM_004753, intron 1 of 5)	7951	NM_001324370	9249		NM_004753	ENSG00000162496	DHRS3	CNALPTC1|DD83.1|RDH17|Rsdr1|SDR1|SDR16C1|retSDR1	dehydrogenase/reductase 3	protein-coding
3427-3	chr9	84265311	84266200	+	10	NA	Intergenic	Intergenic	75003	NR_037638	64078		NM_022127	ENSG00000197506	SLC28A3	CNT3	solute carrier family 28 member 3	protein-coding
2008-3	chr20	50917002	50917015	+	10	NA	intron (NM_001347511, intron 1 of 4)	intron (NM_001347511, intron 1 of 4)	-7217	NM_001282532	23394		NM_015339	ENSG00000101126	ADNP	ADNP1|HVDAS|MRD28	activity dependent neuroprotector homeobox	protein-coding
2217	chr10	121608514	121608837	+	10	NA	Intergenic	CpG	-10217	NM_022970	2263		NM_000141	ENSG00000066468	FGFR2	BBDS|BEK|BFR-1|CD332|CEK3|CFD1|ECT1|JWS|K-SAM|KGFR|TK14|TK25	fibroblast growth factor receptor 2	protein-coding
2865-2	chr16	53826713	53827314	+	10	NA	intron (NM_001363899, intron 3 of 7)	intron (NM_001363899, intron 3 of 7)	122857	NM_001080432	79068		NM_001080432	ENSG00000140718	FTO	ALKBH9|BMIQ14|GDFD|IFEX9	FTO alpha-ketoglutarate dependent dioxygenase	protein-coding
2426-2	chr16	585423	585687	+	10	NA	Intergenic	Intergenic	-3802	NM_001172663	57799		NM_021168	ENSG00000197562	RAB40C	RARL|RASL8C	RAB40C, member RAS oncogene family	protein-coding
1998-8	chr20	63234846	63235244	+	10	NA	promoter-TSS (NM_022161)	promoter-TSS (NM_022161)	-860	NM_139317	79444		NM_022161	ENSG00000101197	BIRC7	KIAP|LIVIN|ML-IAP|MLIAP|RNF50	baculoviral IAP repeat containing 7	protein-coding
2630-6	chr19	49403746	49404254	+	10	NA	intron (NM_144688, intron 9 of 19)	intron (NM_144688, intron 9 of 19)	15751	NM_144688	147872		NM_144688	ENSG00000161609	KASH5	CCDC155|POF22|SPGF88	KASH domain containing 5	protein-coding
3285	chr11	107928379	107928901	+	10	NA	exon (NM_017516, exon 1 of 2)	exon (NM_017516, exon 1 of 2)	192	NM_017516	54734		NM_017516	ENSG00000179331	RAB39A	K28|RAB39	RAB39A, member RAS oncogene family	protein-coding
3098	chr22	35620612	35621330	+	10	NA	intron (NM_001382809, intron 1 of 4)	intron (NM_001382809, intron 1 of 4)	1231	NM_001382811	4151		NM_005368	ENSG00000198125	MB	MYOSB|PVALB	myoglobin	protein-coding
1477-3	chr10	102583985	102584252	+	10	NA	intron (NM_001178133, intron 3 of 10)	intron (NM_001178133, intron 3 of 10)	-60361	NM_030912	81603		NM_030912	ENSG00000171206	TRIM8	FSGSNEDS|GERP|RNF27	tripartite motif containing 8	protein-coding
4455	chr11	68316993	68317861	+	10	NA	intron (NM_002335, intron 1 of 22)	intron (NM_002335, intron 1 of 22)	4836	NM_001291902	4041		NM_002335	ENSG00000162337	LRP5	BMND1|EVR1|EVR4|HBM|LR3|LRP-5|LRP-7|LRP7|OPPG|OPS|OPTA1|PCLD4|VBCH2	LDL receptor related protein 5	protein-coding
2339-4	chr22	21451572	21452085	+	10	NA	TTS (NM_015094)	TTS (NM_015094)	-15342	NM_001207052	645426		NM_001207052	ENSG00000206140	TMEM191C	-	transmembrane protein 191C	protein-coding
3368-4	chr22	25333649	25334241	+	10	NA	Intergenic	Intergenic	15688	NR_029395	91353		NM_001013618	IGLL3P	16.1|IGLL3	immunoglobulin lambda like polypeptide 3, pseudogene	pseudo
2508-4	chr17	44361239	44361776	+	10	NA	intron (NM_198475, intron 1 of 7)	intron (NM_198475, intron 1 of 7)	2346	NM_198475	284069		NM_198475	ENSG00000161682	FAM171A2	-	family with sequence similarity 171 member A2	protein-coding
1779-6	chr17	44598219	44598549	+	10	NA	Intergenic	Intergenic	40900	NM_001466	2535		NM_001466	ENSG00000180340	FZD2	Fz2|OMOD2|fz-2|fzE2|hFz2	frizzled class receptor 2	protein-coding
5054-2	chr17	81200695	81201432	+	10	NA	intron (NM_014984, intron 7 of 25)	L1ME2|LINE|L1	21902	NM_014984	22994		NM_014984	ENSG00000141577	CEP131	AZ1|AZI1|ZA1	centrosomal protein 131	protein-coding
4470-2	chr19	35360059	35361128	+	10	NA	TTS (NM_005304)	TTS (NM_005304)	2133	NM_005304	2865		NM_005304	ENSG00000185897	FFAR3	FFA3R|GPR41|GPR42	free fatty acid receptor 3	protein-coding
3109-3	chr19	7293314	7293808	+	10	NA	intron (NM_001079817, intron 1 of 20)	CpG	853	NM_001079817	3643		NM_000208	ENSG00000171105	INSR	CD220|HHF5	insulin receptor	protein-coding
2668	chr19	2155987	2156384	+	10	NA	Intergenic	Intergenic	-4619	NM_001374799	8943		NM_003938	ENSG00000065000	AP3D1	ADTD|HPS10|hBLVR	adaptor related protein complex 3 subunit delta 1	protein-coding
3336	chr17	2362871	2363574	+	10	NA	intron (NM_001346700, intron 6 of 22)	intron (NM_001346700, intron 6 of 22)	25721	NM_001098509	9905		NM_014853	ENSG00000141258	SGSM2	RUTBC1	small G protein signaling modulator 2	protein-coding
2831-2	chr10	97359961	97360539	+	10	NA	intron (NM_015179, intron 31 of 33)	intron (NM_015179, intron 31 of 33)	-25521	NM_012083	23401		NM_012083	ENSG00000181274	FRAT2	FRAT-2	FRAT regulator of WNT signaling pathway 2	protein-coding
2430-2	chr1	232599727	232600090	+	10	NA	intron (NM_001377488, intron 1 of 21)	intron (NM_001377488, intron 1 of 21)	30225	NM_020808	57568		NM_020808	ENSG00000116991	SIPA1L2	SPAL2|SPAR2	signal induced proliferation associated 1 like 2	protein-coding
5792-3	chr3	50447270	50448296	+	10	NA	intron (NM_006030, intron 2 of 37)	intron (NM_006030, intron 2 of 37)	55851	NM_001005505	9254		NM_006030	ENSG00000007402	CACNA2D2	CACNA2D|CASVDD	calcium voltage-gated channel auxiliary subunit alpha2delta 2	protein-coding
3666-4	chr12	52081792	52082696	+	10	NA	intron (NM_001369216, intron 1 of 2)	intron (NM_001369216, intron 1 of 2)	-2502	NR_120438	26628		NR_120438	ENSG00000290965	OR7E47P	OR7E141	olfactory receptor family 7 subfamily E member 47 pseudogene	pseudo
3022-3	chr9	129584245	129584922	+	10	NA	Intergenic	Intergenic	-24301	NM_001286796	28989		NM_014064	ENSG00000148335	NTMT1	AD-003|C9orf32|HOMT1A|METTL11A|NRMT|NRMT1|NTM1A	N-terminal Xaa-Pro-Lys N-methyltransferase 1	protein-coding
4428-2	chr9	31582644	31583711	+	10	NA	Intergenic	L1MA1|LINE|L1	-201687	NR_135134	101929620		NR_135134	ENSG00000260720	LINC01243	-	long intergenic non-protein coding RNA 1243	ncRNA
2831-5	chr3	57062158	57062717	+	10	NA	intron (NM_181727, intron 1 of 1)	intron (NM_181727, intron 1 of 1)	1773	NM_181727	353324		NM_181727	ENSG00000186451	SPATA12	SRG5	spermatogenesis associated 12	protein-coding
2606	chr2	235514345	235514795	+	10	NA	non-coding (NR_146582, exon 1 of 1)	non-coding (NR_146582, exon 1 of 1)	3351	NR_146582	27321		NR_146582		TNRC17	CAGL234	trinucleotide repeat containing 17	ncRNA
2363-3	chr5	93587668	93588249	+	10	NA	exon (NM_005654, exon 2 of 3)	exon (NM_005654, exon 2 of 3)	4736	NM_005654	7025		NM_005654	ENSG00000175745	NR2F1	BBOAS|BBSOAS|COUP-TFI|COUPTF1|EAR-3|EAR3|ERBAL3|SVP44|TCFCOUP1|TFCOUP1	nuclear receptor subfamily 2 group F member 1	protein-coding
2868-3	chr17	19144110	19144973	+	10	NA	intron (NM_001353418, intron 3 of 3)	(AC)n|Simple_repeat|Simple_repeat	16952	NM_001353418	400581		NM_001129778	ENSG00000189152	GRAPL	GRAPLDR	GRB2 related adaptor protein like	protein-coding
4032	chr7	45080557	45080928	+	10	NA	exon (NM_001146334, exon 7 of 8)	exon (NM_001146334, exon 7 of 8)	8227	NM_001146334	23148		NM_001146334	ENSG00000136274	NACAD	-	NAC alpha domain containing	protein-coding
2141-7	chr5	180179455	180179674	+	10	NA	intron (NM_175062, intron 1 of 13)	intron (NM_175062, intron 1 of 13)	29647	NM_175062	255426		NM_175062	ENSG00000146090	RASGEF1C	-	RasGEF domain family member 1C	protein-coding
4345	chr9	98944027	98944630	+	10	NA	intron (NM_001855, intron 2 of 41)	CpG-28591	421	NM_001855	1306		NM_001855	ENSG00000204291	COL15A1	-	collagen type XV alpha 1 chain	protein-coding
1725-12	chr7	102404410	102404887	+	10	NA	exon (NM_024653, exon 4 of 6)	exon (NM_024653, exon 4 of 6)	1207	NR_031669	100313829		NR_031669	ENSG00000221510	MIR548O	MIRN548O	microRNA 548o	ncRNA
1764-9	chr3	141392140	141392459	+	10	NA	intron (NM_001376167, intron 2 of 4)	intron (NM_001376167, intron 2 of 4)	4652	NM_001376179	253461		NM_152535	ENSG00000177311	ZBTB38	CIBZ|PPP1R171|ZNF921	zinc finger and BTB domain containing 38	protein-coding
2729-4	chr18	48676750	48677309	+	10	NA	intron (NM_014772, intron 6 of 11)	intron (NM_014772, intron 6 of 11)	6429	NR_039897	100616366		NR_039897	ENSG00000266276	MIR4743	-	microRNA 4743	ncRNA
2189-6	chr22	46671933	46672208	+	10	NA	intron (NM_001366660, intron 13 of 17)	intron (NM_001366660, intron 13 of 17)	51684	NM_015124	23151		NM_015124	ENSG00000075240	GRAMD4	DIP	GRAM domain containing 4	protein-coding
2635-4	chr3	128094951	128095548	+	10	NA	intron (NM_003707, intron 8 of 10)	intron (NM_003707, intron 8 of 10)	19439	NR_046645	100874089		NR_046645	ENSG00000239608	RUVBL1-AS1	-	RUVBL1 antisense RNA 1	ncRNA
1527-8	chr22	37321084	37321107	+	10	NA	Intergenic	MIRb|SINE|MIR	33744	NR_110515	100506271		NR_110515	ENSG00000237862	LOC100506271	-	uncharacterized LOC100506271	ncRNA
7601	chr3	46990907	46991197	+	10	NA	intron (NM_001365116, intron 6 of 52)	intron (NM_001365116, intron 6 of 52)	3062	NM_001365116	23218		NM_015175	ENSG00000160796	NBEAL2	BDPLT4|GPS	neurobeachin like 2	protein-coding
2865	chr1	223949469	223949901	+	10	NA	Intergenic	Intergenic	42959	NR_132119	441124		NR_132119		GTF2IP20	-	general transcription factor IIi pseudogene 20	pseudo
2208-7	chr9	121720380	121720466	+	10	NA	intron (NM_032552, intron 3 of 16)	MIRb|SINE|MIR	-22362	NM_138709	153090		NM_032552	ENSG00000136848	DAB2IP	AF9Q34|AIP-1|AIP1|DIP1/2	DAB2 interacting protein	protein-coding
2832	chr1	30461545	30461955	+	10	NA	Intergenic	Intergenic	-257022	NR_034182	100129196		NR_034182	ENSG00000186056	MATN1-AS1	-	MATN1 antisense RNA 1	ncRNA
2296-2	chr15	68199523	68199831	+	10	NA	exon (NM_033429, exon 3 of 5)	exon (NM_033429, exon 3 of 5)	5655	NM_001031733	91860		NM_033429	ENSG00000129007	CALML4	NY-BR-20	calmodulin like 4	protein-coding
9508	chr9	126672947	126673007	+	10	NA	intron (NM_001174147, intron 2 of 7)	intron (NM_001174147, intron 2 of 7)	59049	NM_002316	4010		NM_002316	ENSG00000136944	LMX1B	FSGS10|LMX1.2|NPS1	LIM homeobox transcription factor 1 beta	protein-coding
1922-17	chr7	157872099	157872570	+	10	NA	intron (NM_130842, intron 11 of 21)	intron (NM_130842, intron 11 of 21)	17749	NR_038966	100506585		NR_038966		PTPRN2-AS1	-	PTPRN2 antisense RNA 1	ncRNA
2328-3	chr13	43389510	43390084	+	10	NA	intron (NM_001347970, intron 4 of 15)	intron (NM_001347970, intron 4 of 15)	-59055	NR_120399	100874130		NR_120399		ENOX1-AS2	-	ENOX1 antisense RNA 2	ncRNA
1432-24	chr8	120777806	120778026	+	10	NA	intron (NM_021021, intron 1 of 6)	intron (NM_021021, intron 1 of 6)	16663	NR_125419	101927543		NR_125419	ENSG00000248318	LOC101927543	-	uncharacterized LOC101927543	ncRNA
[truncated: 12,801 more rows]
