# Supplementary material for: Epigenetic control of PDX1 and NGN3 by a computationally designed PRC2 inhibitor enforces pancreatic endocrine differentiation from pluripotent stem cells
Source: Research Square preprint supplement (doi:10.21203/rs.3.rs-9115136/v1), 2026-03-26
Supplement: Supplementary file 2 [file 4f52d3580e5df3ff3cc80682.xlsx]

## Sheet: Table S1
Table S1- List of nearest neibhoring genes to the top 5% significant H3K27ac unique peaks in EBdCas9 control samples
PeakID (cmd=annotatePeaks.pl /anvil/projects/x-bio250068/pancreatic/peaks_05/overlaps/Dunique_top0.05.peaks.bed hg38 -go)	Chr	Start	End	Strand	Peak Score	Focus Ratio/Region Size	Annotation	Detailed Annotation	Distance to TSS	Nearest PromoterID	Entrez ID	Nearest Unigene	Nearest Refseq	Nearest Ensembl	Gene Name	Gene Alias	Gene Description	Gene Type
110284	chr11	57669198	57669488	+	245	NA	intron (NM_015457, intron 1 of 11)	intron (NM_015457, intron 1 of 11)	1229	NM_015457	25921		NM_015457	ENSG00000156599	ZDHHC5	DHHC5|ZNF375	zinc finger DHHC-type palmitoyltransferase 5	protein-coding
188580	chr19	48967289	48967313	+	229	NA	TTS (NM_000146)	TTS (NM_000146)	1992	NM_000146	2512		NM_000146	ENSG00000087086	FTL	FTL1|LFTD|NBIA3	ferritin light chain	protein-coding
109531	chr14	21101068	21101500	+	228	NA	intron (NM_001146683, intron 2 of 7)	intron (NM_001146683, intron 2 of 7)	2347	NM_001146683	643382		NM_001146683	ENSG00000232070	TMEM253	C14orf176|C14orf95|NCRNA00220	transmembrane protein 253	protein-coding
12630	chr18	47853209	47853515	+	218	NA	intron (NM_001135937, intron 5 of 9)	intron (NM_001135937, intron 5 of 9)	77297	NM_005901	4087		NM_005901	ENSG00000175387	SMAD2	CHTD8|JV18|JV18-1|LDS6|MADH2|MADR2|hMAD-2|hSMAD2	SMAD family member 2	protein-coding
86736	chr22	36526724	36527439	+	207	NA	intron (NR_156418, intron 1 of 14)	intron (NR_156418, intron 1 of 14)	2085	NR_156418	8664		NM_003753	ENSG00000100353	EIF3D	EIF3S7|eIF3-p66|eIF3-zeta	eukaryotic translation initiation factor 3 subunit D	protein-coding
8341-2	chrY	9141897	9141961	+	184	NA	Intergenic	Intergenic	180945	NR_001547	286557		NR_001547		RBMY1A3P	-	RNA binding motif protein Y-linked family 1 member A3, pseudogene	pseudo
8897	chr5	94569463	94569545	+	160	NA	intron (NM_001385723, intron 1 of 4)	intron (NM_001385723, intron 1 of 4)	48621	NM_001385730	285600		NM_173665	ENSG00000185261	KIAA0825	C5orf36|PAPA10	KIAA0825	protein-coding
69460	chr11	62577031	62577544	+	142	NA	exon (NM_001367906, exon 6 of 9)	exon (NM_001367906, exon 6 of 9)	-3396	NM_001404	1937		NM_001404	ENSG00000254772	EEF1G	EF1G|GIG35	eukaryotic translation elongation factor 1 gamma	protein-coding
231565	chr7	73734814	73735396	+	139	NA	promoter-TSS (NR_026690)	promoter-TSS (NR_026690)	36	NR_026690	171022		NR_026690		ABHD11-AS1	LINC00035|NCRNA00035|WBSCR26	ABHD11 antisense RNA 1 (tail to tail)	ncRNA
50711	chr11	61966476	61966499	+	133	NA	TTS (NM_001363593)	TTS (NM_001363593)	1147	NM_002032	2495		NM_002032	ENSG00000167996	FTH1	FHC|FTH|FTHL6|HFE5|NBIA9|PIG15|PLIF	ferritin heavy chain 1	protein-coding
5776-2	chr18	2842270	2842330	+	132	NA	Intergenic	Intergenic	-4706	NM_032048	84034		NM_032048	ENSG00000132205	EMILIN2	EMILIN-2|FOAP-10	elastin microfibril interfacer 2	protein-coding
55666	chr3	136247566	136248404	+	127	NA	Intergenic	Intergenic	-2340	NM_001178014	5096		NM_000532	ENSG00000114054	PCCB	-	propionyl-CoA carboxylase subunit beta	protein-coding
84424	chr19	49638922	49638940	+	123	NA	intron (NM_006270, intron 1 of 5)	intron (NM_006270, intron 1 of 5)	1212	NM_006270	6237		NM_006270	ENSG00000126458	RRAS	R-Ras|RRAS1	RAS related	protein-coding
99528	chr2	24082488	24082509	+	123	NA	intron (NM_147184, intron 3 of 5)	intron (NM_147184, intron 3 of 5)	1833	NM_001206802	9540		NM_004881	ENSG00000115129	TP53I3	PIG3	tumor protein p53 inducible protein 3	protein-coding
47275	chr6	10693222	10693973	+	118	NA	intron (NR_148870, intron 1 of 3).2	intron (NR_148870, intron 1 of 3).2	1012	NM_001145020	347744		NM_001145020	ENSG00000137434	C6orf52	-	chromosome 6 open reading frame 52	protein-coding
101162	chr21	31897636	31898354	+	118	NA	intron (NM_014586, intron 1 of 10)	intron (NM_014586, intron 1 of 10)	24975	NM_014586	30811		NM_014586	ENSG00000142149	HUNK	-	hormonally up-regulated Neu-associated kinase	protein-coding
67795	chr19	18151226	18151302	+	113	NA	3' UTR (NM_015016, exon 27 of 27)	3' UTR (NM_015016, exon 27 of 27)	-1899	NR_073517	5296		NM_005027	ENSG00000105647	PIK3R2	MPPH|MPPH1|P85B|p85|p85-BETA|p85beta	phosphoinositide-3-kinase regulatory subunit 2	protein-coding
193520	chr10	80456857	80457004	+	113	NA	intron (NM_001128309, intron 1 of 5)	AluSq2|SINE|Alu	-2355	NM_001351270	81619		NM_030927	ENSG00000108219	TSPAN14	DC-TM4F2|TM4SF14|tspan-14	tetraspanin 14	protein-coding
67795-2	chr19	18155852	18156107	+	113	NA	exon (NM_005027, exon 2 of 16)	exon (NM_005027, exon 2 of 16)	2816	NM_005027	5296		NM_005027	ENSG00000105647	PIK3R2	MPPH|MPPH1|P85B|p85|p85-BETA|p85beta	phosphoinositide-3-kinase regulatory subunit 2	protein-coding
41238	chr10	97319831	97320773	+	109	NA	3' UTR (NM_005479, exon 1 of 1)	3' UTR (NM_005479, exon 1 of 1)	1031	NM_005479	10023		NM_005479	ENSG00000165879	FRAT1	-	FRAT regulator of WNT signaling pathway 1	protein-coding
55187	chr19	44889460	44889554	+	109	NA	TTS (NM_001042724)	TTS (NM_001042724)	-1713	NM_001128916	10452		NM_006114	ENSG00000130204	TOMM40	C19orf1|D19S1177E|PER-EC1|PEREC1|TOM40	translocase of outer mitochondrial membrane 40	protein-coding
65639	chr20	37180893	37180897	+	107	NA	intron (NM_001324299, intron 1 of 16)	L2a|LINE|L2	-1347	NM_152503	140699		NM_152503	ENSG00000101353	MROH8	C20orf131|C20orf132	maestro heat like repeat family member 8	protein-coding
155588	chr1	155005455	155006117	+	106	NA	intron (NM_001377455, intron 2 of 3)	intron (NM_001377455, intron 2 of 3)	2984	NM_001252406	51043		NM_001252406	ENSG00000160685	ZBTB7B	CKROX|THPOK|ZBTB15|ZFP-67|ZFP67|ZNF857B|c-KROX|hcKROX|vGAF	zinc finger and BTB domain containing 7B	protein-coding
62194	chr16	30372410	30372783	+	104	NA	intron (NM_001324458, intron 1 of 8)	intron (NM_001324458, intron 1 of 8)	302	NM_001324458	29895		NM_013292	ENSG00000180209	MYL11	DA1C|HUMMLC2B|MLC2B|MRLC2|MYLPF	myosin light chain 11	protein-coding
103210	chr19	55337554	55337705	+	103	NA	Intergenic	AluSx1|SINE|Alu	-2247	NM_032701	84787		NM_032701	ENSG00000133247	KMT5C	SUV420H2|Suv4-20h2	lysine methyltransferase 5C	protein-coding
105474	chr3	65957636	65958049	+	103	NA	intron (NM_001033057, intron 1 of 22)	AluSq|SINE|Alu	-3284	NR_145422	151877		NR_145422	ENSG00000272610	MAGI1-IT1	-	MAGI1 intronic transcript 1	ncRNA
4772-2	chr5	123761272	123761328	+	100	NA	Intergenic	Intergenic	215883	NM_001044723	1456		NM_004384	ENSG00000151292	CSNK1G3	CKI-gamma 3|CSNK1G3L	casein kinase 1 gamma 3	protein-coding
96399	chr1	44810335	44810346	+	98	NA	exon (NM_001136537, exon 2 of 8)	exon (NM_001136537, exon 2 of 8)	1858	NM_001136537	149478		NM_001136537	ENSG00000222009	BTBD19	-	BTB domain containing 19	protein-coding
120372	chr12	52923891	52924504	+	97	NA	intron (NM_001256293, intron 1 of 8)	AluY|SINE|Alu	2272	NM_001256282	3856		NM_002273	ENSG00000170421	KRT8	CARD2|CK-8|CK8|CYK8|K2C8|K8|KO	keratin 8	protein-coding
87781	chr9	35659484	35659926	+	97	NA	3' UTR (NM_032818, exon 9 of 9)	3' UTR (NM_032818, exon 9 of 9)	1413	NM_001195217	203260		NM_174923	ENSG00000159884	CCDC107	PSEC0222	coiled-coil domain containing 107	protein-coding
87781-2	chr9	35660497	35661542	+	97	NA	exon (NM_001195200, exon 6 of 6)	exon (NM_001195200, exon 6 of 6)	2727	NM_001195217	203260		NM_174923	ENSG00000159884	CCDC107	PSEC0222	coiled-coil domain containing 107	protein-coding
84369	chr16	72921590	72922093	+	96	NA	intron (NM_006885, intron 3 of 9)	intron (NM_006885, intron 3 of 9)	126287	NM_006885	463		NM_006885	ENSG00000140836	ZFHX3	ATBF1|ATBT|ATFB8|C16orf47|SCA4|ZFH-3|ZNF927	zinc finger homeobox 3	protein-coding
107136	chr19	49873710	49873727	+	96	NA	intron (NM_001278160, intron 1 of 4)	FLAM_C|SINE|Alu	2531	NM_001278159	84335		NM_032375	ENSG00000204673	AKT1S1	Lobe|PRAS40	AKT1 substrate 1	protein-coding
76956	chr12	53661676	53661822	+	95	NA	Intergenic	FLAM_A|SINE|Alu	13670	NM_001330269	517		NM_005176	ENSG00000135390	ATP5MC2	ATP5A|ATP5G2	ATP synthase membrane subunit c locus 2	protein-coding
41260	chr1	9912001	9912147	+	95	NA	Intergenic	L2c|LINE|L2	-1805	NM_001012329	56998		NM_020248	ENSG00000178585	CTNNBIP1	ICAT	catenin beta interacting protein 1	protein-coding
53951	chr1	28647430	28647496	+	94	NA	intron (NR_146730, intron 1 of 1)	AluJb|SINE|Alu	-1137	NR_004407	26824		NR_004407	ENSG00000274978	RNU11	RNU11-1|U11	RNA, U11 small nuclear	snRNA
42293	chr1	121187205	121187989	+	94	NA	intron (NM_001271872, intron 2 of 9)	intron (NM_001271872, intron 2 of 9)	2622	NM_001271872	653464		NM_001271872	ENSG00000171943	SRGAP2C	SRGAP2P1	SLIT-ROBO Rho GTPase activating protein 2C	protein-coding
120309	chr22	23516254	23517068	+	93	NA	Intergenic	Intergenic	-21441	NR_109832	101978785		NR_109832		PCAT14	-	prostate cancer associated transcript 14	ncRNA
53383	chr2	26243777	26243825	+	93	NA	promoter-TSS (NM_001281512)	promoter-TSS (NM_001281512)	831	NM_000182	3030		NM_000182	ENSG00000084754	HADHA	ECHA|GBP|HADH|LCEH|LCHAD|MTPA|TP-ALPHA	hydroxyacyl-CoA dehydrogenase trifunctional multienzyme complex subunit alpha	protein-coding
50496	chr19	50806352	50806360	+	91	NA	Intergenic	L2a|LINE|L2	-1503	NM_001290153	84798		NM_032712	ENSG00000293495	C19orf48P	C19orf48|CA916798	multidrug resistance-related protein	pseudo
4405-4	chrX	55183501	55183558	+	90	NA	promoter-TSS (NR_132964)	promoter-TSS (NR_132964)	78	NR_132964	106635544		NR_132964		SNORA109	-	small nucleolar RNA, H/ACA box 109	snoRNA
50084	chr11	62752402	62752522	+	89	NA	exon (NM_001363109, exon 2 of 2)	exon (NM_001363109, exon 2 of 2)	1698	NM_001363109	79842		NM_024784	ENSG00000185670	ZBTB3	-	zinc finger and BTB domain containing 3	protein-coding
52294	chr1	206205241	206205361	+	86	NA	promoter-TSS (NM_001385241)	promoter-TSS (NM_001385241)	472	NM_001385240	729533		NM_001123168	ENSG00000196550	FAM72A	LMPIP|Ugene|p17	family with sequence similarity 72 member A	protein-coding
59164	chr16	3460972	3461360	+	86	NA	intron (NM_001317095, intron 1 of 5)	L4_B_Mam|LINE|RTE-X	3121	NM_001317094	79903		NM_024845	ENSG00000122390	NAA60	HAT4|IBGC9|NAT15|NatF|hNaa60	N-alpha-acetyltransferase 60, NatF catalytic subunit	protein-coding
89394	chr13	41058258	41059054	+	86	NA	intron (NM_001370329, intron 1 of 9)	intron (NM_001370329, intron 1 of 9)	2730	NM_001370330	1997		NM_172373	ENSG00000120690	ELF1	EFTUD1|RIA1	E74 like ETS transcription factor 1	protein-coding
84646	chr1	202015229	202016423	+	86	NA	3' UTR (NM_001114309, exon 9 of 9)	3' UTR (NM_001114309, exon 9 of 9)	5239	NM_001114309	1999		NM_004433	ENSG00000163435	ELF3	EPR-1|ERT|ESE-1|ESX	E74 like ETS transcription factor 3	protein-coding
82315	chr11	64242930	64243149	+	85	NA	intron (NM_001370414, intron 2 of 5)	AluSx1|SINE|Alu	923	NM_057092	2286		NM_004470	ENSG00000173486	FKBP2	FKBP-13|FKBP13|PPIase	FKBP prolyl isomerase 2	protein-coding
68199	chr9	133895877	133896271	+	84	NA	intron (NM_001134398, intron 2 of 29)	SVA_E|Retroposon|SVA	96250	NM_001134398	7410		NM_003371	ENSG00000160293	VAV2	VAV-2	vav guanine nucleotide exchange factor 2	protein-coding
93744	chr2	43195859	43196241	+	81	NA	Intergenic	AluJo|SINE|Alu	30556	NM_006887	678		NM_006887	ENSG00000152518	ZFP36L2	BRF2|ERF-2|ERF2|OOMD13|OZEMA13|RNF162C|TIS11D	ZFP36 ring finger protein like 2	protein-coding
70379	chr17	7481555	7481965	+	81	NA	intron (NM_001102614, intron 1 of 1)	intron (NM_001102614, intron 1 of 1)	358	NM_001102614	643664		NM_001102614	ENSG00000259224	SLC35G6	AMAC1L3|TMEM21B	solute carrier family 35 member G6	protein-coding
132943	chr19	38716375	38716560	+	81	NA	intron (NM_004924, intron 9 of 20)	intron (NM_004924, intron 9 of 20)	28007	NM_144691	147968		NM_144691	ENSG00000182472	CAPN12	-	calpain 12	protein-coding
132943-2	chr19	38716789	38717192	+	81	NA	intron (NM_004924, intron 9 of 20)	intron (NM_004924, intron 9 of 20)	27484	NM_144691	147968		NM_144691	ENSG00000182472	CAPN12	-	calpain 12	protein-coding
41016	chr22	38703687	38704456	+	80	NA	Intergenic	MER21B|LTR|ERVL	-1873	NM_004286	9567		NM_004286	ENSG00000100226	GTPBP1	GP-1|GP1|HSPC018	GTP binding protein 1	protein-coding
74420	chr12	102887207	102887877	+	80	NA	intron (NM_001354304, intron 4 of 13)	intron (NM_001354304, intron 4 of 13)	29702	NM_000277	5053		NM_000277	ENSG00000171759	PAH	PH|PKU|PKU1	phenylalanine hydroxylase	protein-coding
33363	chr14_GL000225v1_random	24492	24667	+	80	NA	NA	BSR/Beta|Satellite|Satellite	NA	NA
54099	chr2	55233932	55234013	+	79	NA	promoter-TSS (NR_039624).3	promoter-TSS (NR_039624).3	-192	NR_039624	100616345		NR_039624	ENSG00000283795	MIR4426	-	microRNA 4426	ncRNA
66653	chr1	28739140	28739581	+	78	NA	intron (NM_016258, intron 3 of 4)	AluSq2|SINE|Alu	2420	NM_016258	51441		NM_016258	ENSG00000198492	YTHDF2	CAHL|DF2|HGRG8|NY-REN-2	YTH N6-methyladenosine RNA binding protein F2	protein-coding
54496	chr14	39172877	39173160	+	78	NA	Intergenic	Intergenic	-2236	NM_002687	5411		NM_002687	ENSG00000100941	PNN	DRS|DRSP|SDK3|memA	pinin, desmosome associated protein	protein-coding
65645	chr1	119776252	119776804	+	78	NA	Intergenic	AluSz|SINE|Alu	-7596	NM_001166107	3158		NM_005518	ENSG00000134240	HMGCS2	-	3-hydroxy-3-methylglutaryl-CoA synthase 2	protein-coding
129079	chr9	129138054	129138214	+	77	NA	intron (NM_001271832, intron 7 of 8)	intron (NM_001271832, intron 7 of 8)	26446	NM_001193397	5524		NM_021131	ENSG00000119383	PTPA	PARK25|PP2A|PPP2R4|PR53	protein phosphatase 2 phosphatase activator	protein-coding
123137	chr5	168318378	168319554	+	77	NA	intron (NM_015238, intron 1 of 22)	L1MB3|LINE|L1	27321	NM_015238	23286		NM_015238	ENSG00000113645	WWC1	HBEBP3|HBEBP36|KIBRA|MEMRYQTL|PPP1R168	WW and C2 domain containing 1	protein-coding
41078	chr2	61889612	61890330	+	76	NA	intron (NM_001321781, intron 1 of 2)	MIRb|SINE|MIR	1271	NM_001321781	150684		NM_152516	ENSG00000173163	COMMD1	C2orf5|MURR1	copper metabolism domain containing 1	protein-coding
45651	chr14_GL000225v1_random	69362	69415	+	75	NA	NA	BSR/Beta|Satellite|Satellite	NA	NA
59956-2	chr17	50903025	50903474	+	74	NA	Intergenic	AluSx1|SINE|Alu	-35271	NM_001243877	10140		NM_005749	ENSG00000141232	TOB1	APRO5|APRO6|PIG49|TOB|TROB|TROB1	transducer of ERBB2, 1	protein-coding
36249	chr11	47425027	47425160	+	74	NA	intron (NM_002804, intron 3 of 11)	intron (NM_002804, intron 3 of 11)	1346	NM_002804	5702		NM_002804	ENSG00000165916	PSMC3	DCIDP|RPT5|TBP1	proteasome 26S subunit, ATPase 3	protein-coding
59956	chr17	50902712	50902825	+	74	NA	Intergenic	Intergenic	-34790	NM_001243877	10140		NM_005749	ENSG00000141232	TOB1	APRO5|APRO6|PIG49|TOB|TROB|TROB1	transducer of ERBB2, 1	protein-coding
34678	chr1	23560481	23561334	+	74	NA	Intergenic	MIR3|SINE|MIR	-1406	NM_002167	3399		NM_002167	ENSG00000117318	ID3	HEIR-1|bHLHb25	inhibitor of DNA binding 3	protein-coding
35585-2	chr7	56053004	56053012	+	73	NA	intron (NM_001009186, intron 2 of 12)	AluSx|SINE|Alu	1243	NM_001762	908		NM_001762	ENSG00000146731	CCT6A	CCT-zeta|CCT-zeta-1|CCT6|Cctz|HTR3|MoDP-2|TCP-1-zeta|TCP20|TCPZ|TTCP20	chaperonin containing TCP1 subunit 6A	protein-coding
35585	chr7	56050660	56050730	+	73	NA	intron (NM_001370518, intron 1 of 10)	L1ME4b|LINE|L1	749	NM_001370519	5723		NM_004577	ENSG00000146733	PSPH	PSP|PSPHD	phosphoserine phosphatase	protein-coding
101538	chr5	177092836	177093229	+	72	NA	intron (NM_022963, intron 7 of 15)	intron (NM_022963, intron 7 of 15)	3482	NM_022963	2264		NM_002011	ENSG00000160867	FGFR4	CD334|JTK2|TKF	fibroblast growth factor receptor 4	protein-coding
165835	chr17	2403028	2404004	+	72	NA	Intergenic	Intergenic	-2456	NM_020310	4335		NM_020310	ENSG00000070444	MNT	MAD6|MXD6|ROX|bHLHd3|lncRNA-HAL	MAX network transcriptional repressor	protein-coding
35296	chr19	45887654	45887845	+	71	NA	Intergenic	Intergenic	-1608	NM_015649	26145		NM_015649	ENSG00000170604	IRF2BP1	-	interferon regulatory factor 2 binding protein 1	protein-coding
41812	chr3	8445366	8445397	+	71	NA	intron (NR_033378, intron 3 of 3)	L3|LINE|CR1	56277	NR_033378	100288428		NR_033378	ENSG00000227110	LMCD1-AS1	-	LMCD1 antisense RNA 1	ncRNA
53915	chr2	159614562	159614607	+	70	NA	promoter-TSS (NR_110587)	promoter-TSS (NR_110587)	-710	NR_110587	643072		NR_110587	ENSG00000224152	BAZ2B-AS1	lnc-BAZ2B	BAZ2B antisense RNA 1	ncRNA
4934-3	chrX	126471890	126472548	+	70	NA	Intergenic	Intergenic	80595	NM_178470	139170		NM_178470	ENSG00000198889	DCAF12L1	KIAA1892L|WDR40B	DDB1 and CUL4 associated factor 12 like 1	protein-coding
50358	chr11	114088168	114088719	+	70	NA	intron (NM_001354751, intron 2 of 6)	intron (NM_001354751, intron 2 of 6)	25232	NM_001354752	7704		NM_006006	ENSG00000109906	ZBTB16	PLZF|ZNF145	zinc finger and BTB domain containing 16	protein-coding
181377	chr9	37960807	37961138	+	70	NA	intron (NM_003028, intron 3 of 5)	intron (NM_003028, intron 3 of 5)	-56619	NR_024873	92014		NM_033412	ENSG00000122696	SLC25A51	CG7943|MCART1	solute carrier family 25 member 51	protein-coding
30546	chr17	39462844	39463413	+	69	NA	intron (NM_016507, intron 1 of 13)	intron (NM_016507, intron 1 of 13)	1642	NM_016507	51755		NM_015083	ENSG00000167258	CDK12	CRK7|CRKR|CRKRS	cyclin dependent kinase 12	protein-coding
54287	chr15	38070549	38071966	+	69	NA	TTS (NR_147200)	TTS (NR_147200)	1733	NR_147200	107984773		NR_147199	ENSG00000236914	LINC01852	-	long intergenic non-protein coding RNA 1852	ncRNA
53435	chr7	149202387	149203143	+	69	NA	intron (NM_001303481, intron 2 of 8)	L2a|LINE|L2	7219	NM_003575	8427		NM_003575	ENSG00000170265	ZNF282	HUB1	zinc finger protein 282	protein-coding
202817	chr19	45871685	45872203	+	69	NA	intron (NM_004497, intron 1 of 1)	intron (NM_004497, intron 1 of 1)	7618	NM_004497	3171		NM_004497	ENSG00000170608	FOXA3	FKHH3|HNF3G|TCF3G	forkhead box A3	protein-coding
41011	chr17	29292074	29292678	+	68	NA	intron (NM_020772, intron 1 of 3)	intron (NM_020772, intron 1 of 3)	1772	NM_020772	57532		NM_020772	ENSG00000108256	NUFIP2	182-FIP|82-FIP|FIP-82|NUFP2|PIG1	nuclear FMR1 interacting protein 2	protein-coding
88906	chr1	149855820	149856096	+	68	NA	intron (NR_168447, intron 1 of 1).2	AluJo|SINE|Alu	3350	NM_001005464	333932		NM_001005464	ENSG00000203852	H3C15	H3/n|H3/o|H3C13|H3C14|HIST2H3A	H3 clustered histone 15	protein-coding
38572	chr7	66491947	66492747	+	67	NA	Intergenic	Intergenic	-1285	NR_134573	100289098		NR_134570	ENSG00000237310	LINC03011	GS1-124K5.4	long intergenic non-protein coding RNA 3011	ncRNA
53608	chr19	45715491	45715895	+	67	NA	promoter-TSS (NM_001329632)	promoter-TSS (NM_001329632)	-415	NM_001329632	23403		NM_001080469	ENSG00000177051	FBXO46	20D7-FC4|FBXO34L|Fbx46	F-box protein 46	protein-coding
51083	chr13	30616437	30616479	+	67	NA	intron (NM_001370340, intron 1 of 4)	intron (NM_001370340, intron 1 of 4)	1129	NM_001370340	3146		NM_002128	ENSG00000189403	HMGB1	HMG-1|HMG1|HMG3|SBP-1	high mobility group box 1	protein-coding
33730	chr22	31750675	31751078	+	67	NA	promoter-TSS (NM_173566)	promoter-TSS (NM_173566)	-744	NM_173566	253143		NM_173566	ENSG00000183530	PRR14L	C22orf30	proline rich 14 like	protein-coding
70992	chr9	129336429	129336899	+	66	NA	promoter-TSS (NR_120685)	promoter-TSS (NR_120685)	-259	NR_120685	100506119		NR_120685	ENSG00000233901	LINC01503	-	long intergenic non-protein coding RNA 1503	ncRNA
79455	chr10	132406342	132406461	+	66	NA	intron (NM_138499, intron 2 of 2)	intron (NM_138499, intron 2 of 2)	9201	NM_001098637	170394		NM_138499	ENSG00000171813	PWWP2B	PWWP2|bA432J24.1|pp8607	PWWP domain containing 2B	protein-coding
96417	chr20	47322919	47323137	+	66	NA	intron (NM_001281781, intron 2 of 20)	MIR|SINE|MIR	4526	NR_024594	100131496		NR_024594	ENSG00000267882	LOC100131496	-	uncharacterized LOC100131496	ncRNA
32127	chr3	129400844	129402380	+	66	NA	exon (NM_207307, exon 9 of 9)	exon (NM_207307, exon 9 of 9)	-2173	NR_003111	132241		NR_003111	ENSG00000290993	RPL32P3	-	ribosomal protein L32 pseudogene 3	pseudo
53605	chr17	7249396	7250249	+	66	NA	intron (NM_015343, intron 2 of 8)	AluSx1|SINE|Alu	1912	NM_001143775	23399		NM_015343	ENSG00000175826	CTDNEP1	DULLARD|HSA011916|NET56	CTD nuclear envelope phosphatase 1	protein-coding
36324	chr15	75901978	75902803	+	65	NA	Intergenic	LTR75_1|LTR|ERV1	-1469	NM_012170	26263		NM_012170	ENSG00000167196	FBXO22	FBX22|FISTC1	F-box protein 22	protein-coding
29663	chr16	28492766	28493496	+	65	NA	Intergenic	AluJb|SINE|Alu	-1049	NM_000086	1201		NM_000086	ENSG00000188603	CLN3	BTN1|BTS|JNCL	CLN3 lysosomal/endosomal transmembrane protein, battenin	protein-coding
43196	chr11	34823534	34824029	+	65	NA	Intergenic	Intergenic	-92349	NM_001135024	8050		NM_003477	ENSG00000110435	PDHX	DLDBP|E3BP|OPDX|PDHXD|PDX1|proX	pyruvate dehydrogenase complex component X	protein-coding
54033	chr12	49057772	49059007	+	63	NA	intron (NM_003482, intron 1 of 54)	intron (NM_003482, intron 1 of 54)	2405	NM_003482	8085		NM_003482	ENSG00000167548	KMT2D	AAD10|ALR|BCAHH|CAGL114|KABUK1|KMS|MLL2|MLL4|TNRC21	lysine methyltransferase 2D	protein-coding
54495	chr20	34701964	34702857	+	63	NA	Intergenic	Intergenic	-1934	NM_021202	58476		NM_021202	ENSG00000078804	TP53INP2	C20orf110|DOR|PIG-U|PIGU|PINH|dJ1181N3.1	tumor protein p53 inducible nuclear protein 2	protein-coding
69655	chr3	184364283	184364379	+	63	NA	intron (NM_001278699, intron 2 of 5)	AluSz|SINE|Alu	970	NM_001278698	5437		NM_006232	ENSG00000163882	POLR2H	RPABC3|RPB17|RPB8	RNA polymerase II, I and III subunit H	protein-coding
59552	chr10	97587057	97588006	+	63	NA	intron (NM_001134670, intron 1 of 2)	AluSx1|SINE|Alu	-2190	NM_001009997	414157		NM_001009997	ENSG00000203942	C10orf62	bA548K23.1	chromosome 10 open reading frame 62	protein-coding
35803	chr12	111598762	111599085	+	63	NA	promoter-TSS (NR_146497)	promoter-TSS (NR_146497)	392	NM_002973	6311		NM_002973	ENSG00000204842	ATXN2	ATX2|SCA2|TNRC13	ataxin 2	protein-coding
40020	chr17	7405565	7406028	+	63	NA	Intergenic	Intergenic	-1665	NR_037719	100529211		NR_037719		TMEM256-PLSCR3	C17orf61-PLSCR3|PLSCR3	TMEM256-PLSCR3 readthrough (NMD candidate)	ncRNA
39317	chr9	121742043	121743093	+	62	NA	promoter-TSS (NM_138709)	promoter-TSS (NM_138709)	-217	NM_138709	153090		NM_032552	ENSG00000136848	DAB2IP	AF9Q34|AIP-1|AIP1|DIP1/2	DAB2 interacting protein	protein-coding
113135	chr9	114083707	114083862	+	62	NA	Intergenic	Intergenic	-5484	NM_001633	259		NM_001633	ENSG00000106927	AMBP	A1M|EDC1|HCP|HI30|IATIL|ITI|ITIL|ITILC|UTI	alpha-1-microglobulin/bikunin precursor	protein-coding
42366	chr9	128068327	128068967	+	62	NA	intron (NM_001006641, intron 1 of 9)	CpG	447	NM_001006641	114789		NM_052901	ENSG00000148339	SLC25A25	MCSC|PCSCL|SCAMC-2|SCAMC2	solute carrier family 25 member 25	protein-coding
38487	chr5	119305963	119306215	+	61	NA	intron (NM_001077654, intron 1 of 1)	intron (NM_001077654, intron 1 of 1)	-27086	NM_001286814	25816		NM_014350	ENSG00000145779	TNFAIP8	GG2-1|MDC-3.13|NDED|SCC-S2|SCCS2	TNF alpha induced protein 8	protein-coding
43086	chr1	154969185	154969816	+	61	NA	intron (NM_001130041, intron 2 of 12)	intron (NM_001130041, intron 2 of 12)	1247	NM_001130040	6464		NM_003029	ENSG00000160691	SHC1	SHC|SHCA	SHC adaptor protein 1	protein-coding
40882	chr9	34071665	34071901	+	61	NA	Intergenic	AluSx|SINE|Alu	-22584	NM_001370059	55833		NM_018449	ENSG00000137073	UBAP2	UBAP-2	ubiquitin associated protein 2	protein-coding
58749	chr6	111549363	111550346	+	61	NA	intron (NR_034109, intron 1 of 1)	L2c|LINE|L2	17425	NM_001164283	10758		NM_147200	ENSG00000056972	TRAF3IP2	ACT1|C6orf2|C6orf4|C6orf5|C6orf6|CANDF8|CIKS|PSORS13	TRAF3 interacting protein 2	protein-coding
63303	chr12	95216067	95216232	+	60	NA	intron (NM_018351, intron 1 of 20)	intron (NM_018351, intron 1 of 20)	1318	NM_018351	55785		NM_018351	ENSG00000180263	FGD6	ZFYVE24	FYVE, RhoGEF and PH domain containing 6	protein-coding
55773	chr13	26971187	26971187	+	60	NA	Intergenic	L1MC5|LINE|L1	-154346	NR_046547	100874070		NR_046547		USP12-AS1	-	USP12 antisense RNA 1	ncRNA
6502	chr17	53105992	53106383	+	60	NA	Intergenic	Intergenic	120682	NR_164143	100506650		NR_164143	ENSG00000227011	LINC02876	C17orf112	long intergenic non-protein coding RNA 2876	ncRNA
81689	chr7	73161698	73162103	+	60	NA	intron (NR_002206, intron 1 of 23)	MLT1L|LTR|ERVL-MaLR	-6451	NM_001382505	643862		NM_001382504	ENSG00000274570	SPDYE10	SPDYE10P	speedy/RINGO cell cycle regulator family member E10	protein-coding
30466	chr8	140703856	140703857	+	60	NA	intron (NR_148036, intron 26 of 34)	intron (NR_148036, intron 26 of 34)	14713	NM_001352750	5747		NM_005607	ENSG00000169398	PTK2	FADK|FADK 1|FAK|FAK1|FRNK|PPP1R71|p125FAK|pp125FAK	protein tyrosine kinase 2	protein-coding
19114	chr4	6672465	6673103	+	59	NA	intron (NR_134664, intron 1 of 1)	LTR12C|LTR|ERV1	1097	NR_134664	105374366		NR_134664	ENSG00000251580	LINC02482	-	long intergenic non-protein coding RNA 2482	ncRNA
37700	chr11	66618154	66618745	+	59	NA	intron (NM_001198846, intron 1 of 1)	intron (NM_001198846, intron 1 of 1)	1819	NM_001198837	10432		NM_006328	ENSG00000239306	RBM14	COAA|PSP2|SIP|SYTIP1|TMEM137	RNA binding motif protein 14	protein-coding
41635-2	chr4	77074987	77075372	+	59	NA	promoter-TSS (NM_001348133)	promoter-TSS (NM_001348133)	-269	NM_001348133	10983		NM_006835	ENSG00000118816	CCNI	CCNI1|CYC1|CYI	cyclin I	protein-coding
84337	chr4	139787910	139788513	+	59	NA	intron (NM_018717, intron 2 of 4)	intron (NM_018717, intron 2 of 4)	122392	NM_002413	4258		NM_002413	ENSG00000085871	MGST2	GST2|MGST-II	microsomal glutathione S-transferase 2	protein-coding
43859	chr17	43268508	43268650	+	59	NA	Intergenic	LTR13|LTR|ERVK	-1756	NR_002716	6066		NR_002716	ENSG00000274585	RNU2-1	RNU2|U2	RNA, U2 small nuclear 1	snRNA
41635	chr4	77073191	77074799	+	59	NA	intron (NM_006835, intron 1 of 6)	intron (NM_006835, intron 1 of 6)	915	NM_001348133	10983		NM_006835	ENSG00000118816	CCNI	CCNI1|CYC1|CYI	cyclin I	protein-coding
33867	chr10	43406558	43407199	+	58	NA	intron (NM_001098204, intron 1 of 3)	intron (NM_001098204, intron 1 of 3)	973	NM_001098206	3185		NM_004966	ENSG00000169813	HNRNPF	HNRPF|OK/SW-cl.23|mcs94-1	heterogeneous nuclear ribonucleoprotein F	protein-coding
50563	chr2	231602881	231603437	+	58	NA	Intergenic	MLT1K|LTR|ERVL-MaLR	10295	NM_152614	165100		NM_152614	ENSG00000177673	TEX44	C2orf57	testis expressed 44	protein-coding
2906-2	chr11	10507889	10507963	+	58	NA	TTS (NM_000480)	TTS (NM_000480)	400	NR_039705	100616263		NR_039705	ENSG00000283813	MIR4485	mir-4485	microRNA 4485	ncRNA
81782	chr17	28721569	28722171	+	58	NA	promoter-TSS (NR_000010)	promoter-TSS (NR_000010)	-712	NR_000010	26773		NR_000010	ENSG00000238578	SNORD4A	RNU101A|Z17A|mgh18S-121	small nucleolar RNA, C/D box 4A	snoRNA
31378	chr16	23556230	23556890	+	58	NA	intron (NM_001083614, intron 1 of 8)	AluSp|SINE|Alu	790	NM_001083614	124454		NM_001083614	ENSG00000103356	EARS2	COXPD12|MSE1|gluRS|mtGlnRS|mtGluRS	glutamyl-tRNA synthetase 2, mitochondrial	protein-coding
85148	chr11	33689285	33690085	+	57	NA	Intergenic	Intergenic	11055	NM_001166692	100131378		NM_001166692	ENSG00000205177	C11orf91	-	chromosome 11 open reading frame 91	protein-coding
65690	chr3	53842030	53842071	+	57	NA	intron (NM_018397, intron 1 of 8)	AluJr|SINE|Alu	4369	NM_018397	55349		NM_018397	ENSG00000016391	CHDH	-	choline dehydrogenase	protein-coding
75151	chr11	117819957	117820253	+	57	NA	TTS (NM_001680)	TTS (NM_001680)	-2591	NM_001367905	57453		NM_020693	ENSG00000177103	DSCAML1	DSCAM2	DS cell adhesion molecule like 1	protein-coding
92455	chr5	179822406	179822938	+	57	NA	intron (NM_003900, intron 1 of 7).2	intron (NM_003900, intron 1 of 7).2	1767	NM_003900	8878		NM_003900	ENSG00000161011	SQSTM1	A170|DMRV|FTDALS3|NADGP|OSIL|PDB3|ZIP3|p60|p62|p62B	sequestosome 1	protein-coding
31968	chr7	39624544	39624711	+	56	NA	intron (NM_005402, intron 1 of 4)	intron (NM_005402, intron 1 of 4)	1055	NM_005402	5898		NM_005402	ENSG00000006451	RALA	HINCONS|RAL	RAS like proto-oncogene A	protein-coding
65743	chr5	95958057	95958807	+	56	NA	intron (NM_012081, intron 1 of 11)	intron (NM_012081, intron 1 of 11)	3419	NM_012081	22936		NM_012081	ENSG00000118985	ELL2	MRCCAT1	elongation factor for RNA polymerase II 2	protein-coding
63873	chr1	203285240	203285453	+	56	NA	Intergenic	Intergenic	-1806	NR_117097	100506775		NR_117097	ENSG00000231507	LINC01353	-	long intergenic non-protein coding RNA 1353	ncRNA
23737	chr8	23247675	23247738	+	56	NA	intron (NM_001363183, intron 1 of 8)	MIRc|SINE|MIR	1065	NM_001317899	91782		NM_152272	ENSG00000147457	CHMP7	-	charged multivesicular body protein 7	protein-coding
67587	chr20	35260207	35261509	+	56	NA	intron (NM_006690, intron 4 of 8)	intron (NM_006690, intron 4 of 8)	17264	NM_001355008	111089941		NM_001355008		MMP24-AS1-EDEM2	-	MMP24-AS1-EDEM2 readthrough	protein-coding
66792	chr19	11096493	11097002	+	56	NA	intron (NM_001195800, intron 1 of 15)	MLT1F1|LTR|ERVL-MaLR	-7088	NR_163945	115271120		NR_163945		LDLR-AS1	-	LDLR antisense RNA 1	ncRNA
35771	chr2	64749875	64750425	+	56	NA	Intergenic	GA-rich|Low_complexity|Low_complexity	-96237	NM_014755	9792		NM_014755	ENSG00000179833	SERTAD2	Sei-2|TRIP-Br2|TRIPBR2	SERTA domain containing 2	protein-coding
74388	chr17	49016819	49017423	+	56	NA	intron (NM_001160423, intron 2 of 12)	intron (NM_001160423, intron 2 of 12)	19736	NM_001160423	10642		NM_006546	ENSG00000159217	IGF2BP1	CRD-BP|CRDBP|IMP-1|IMP1|VICKZ1|ZBP1	insulin like growth factor 2 mRNA binding protein 1	protein-coding
28749	chr18	51028217	51028756	+	56	NA	Intergenic	MLT1F2|LTR|ERVL-MaLR	-1727	NM_005359	4089		NM_005359	ENSG00000141646	SMAD4	DPC4|JIP|MADH4|MYHRS	SMAD family member 4	protein-coding
35987	chr11	44851477	44852311	+	55	NA	intron (NM_130783, intron 2 of 9)	L2a|LINE|L2	98266	NM_001258320	9537		NM_006034	ENSG00000175274	TP53I11	PIG11	tumor protein p53 inducible protein 11	protein-coding
54777	chr7	123745923	123746552	+	55	NA	intron (NM_003941, intron 1 of 10)	L2c|LINE|L2	2766	NM_003941	8976		NM_003941	ENSG00000106299	WASL	N-WASP|NWASP|WASPB	WASP like actin nucleation promoting factor	protein-coding
19412	chr5	42812615	42812692	+	55	NA	promoter-TSS (NM_005410)	promoter-TSS (NM_005410)	-577	NM_001093726	6414		NM_005410	ENSG00000250722	SELENOP	SELP|SEPP|SEPP1|SeP	selenoprotein P	protein-coding
74786	chr10	113064911	113065745	+	55	NA	intron (NM_001363501, intron 5 of 13)	intron (NM_001363501, intron 5 of 13)	19973	NR_132769	106635520		NR_132769		SNORA87	-	small nucleolar RNA, H/ACA box 87	snoRNA
21879	chr17	28901512	28901848	+	54	NA	intron (NM_144683, intron 2 of 4)	intron (NM_144683, intron 2 of 4)	1399	NM_144683	147015		NM_144683	ENSG00000167536	DHRS13	SDR7C5	dehydrogenase/reductase 13	protein-coding
44770	chr14	31024659	31024834	+	54	NA	promoter-TSS (NM_001128126)	promoter-TSS (NM_001128126)	-360	NM_001254729	11154		NM_007077	ENSG00000100478	AP4S1	AP47B|CLA20|CLAPS4|CPSQ6|SPG52	adaptor related protein complex 4 subunit sigma 1	protein-coding
70056	chr6	41574226	41574546	+	54	NA	intron (NM_138457, intron 2 of 16)	MIRc|SINE|MIR	-24337	NR_039784	100616178		NR_039784	ENSG00000266494	MIR4641	-	microRNA 4641	ncRNA
31012	chr11	96241435	96242069	+	54	NA	intron (NM_032427, intron 1 of 4)	intron (NM_032427, intron 1 of 4)	-99686	NR_036125	100422991		NR_036125	ENSG00000266192	MIR1260B	mir-1260b	microRNA 1260b	ncRNA
52516	chr13	113723042	113724052	+	53	NA	intron (NM_002929, intron 4 of 6)	MER4A1|LTR|ERV1	27542	NR_028064	100130386		NM_001137672	ENSG00000279770	LINC00552	-	long intergenic non-protein coding RNA 552	ncRNA
95322	chr17	2000913	2001714	+	53	NA	intron (NM_178568, intron 1 of 1)	AluY|SINE|Alu	-16403	NR_135642	105371485		NR_135642	ENSG00000228133	LOC105371485	-	uncharacterized LOC105371485	ncRNA
31250	chr10	102643623	102643993	+	53	NA	promoter-TSS (NM_001345950)	promoter-TSS (NM_001345950)	-671	NM_030912	81603		NM_030912	ENSG00000171206	TRIM8	FSGSNEDS|GERP|RNF27	tripartite motif containing 8	protein-coding
73540	chr19	49873156	49873548	+	53	NA	intron (NM_001278160, intron 1 of 4)	intron (NM_001278160, intron 1 of 4)	2897	NM_001278159	84335		NM_032375	ENSG00000204673	AKT1S1	Lobe|PRAS40	AKT1 substrate 1	protein-coding
150410	chr22	37572133	37572514	+	53	NA	intron (NM_006498, intron 1 of 3)	intron (NM_006498, intron 1 of 3)	7764	NM_006498	3957		NM_006498	ENSG00000100079	LGALS2	HL14	galectin 2	protein-coding
35903	chr4	38905561	38906366	+	53	NA	intron (NM_138389, intron 6 of 14)	intron (NM_138389, intron 6 of 14)	37931	NR_030300	693159		NR_030300	ENSG00000207944	MIR574	MIR574-3p|MIRN574|hsa-mir-574|mir-574	microRNA 574	ncRNA
47276	chr6	21884781	21884947	+	53	NA	intron (NR_015410, intron 4 of 11)	intron (NR_015410, intron 4 of 11)	218451	NR_015410	401237		NR_015410		CASC15	CANT|LINC00340|lnc-SOX4-1	cancer susceptibility 15	ncRNA
40900	chr19	34732137	34732752	+	53	NA	Intergenic	LTR16E2|LTR|ERVL	-1799	NM_001145665	339318		NM_001029997	ENSG00000197841	ZNF181	HHZ181	zinc finger protein 181	protein-coding
31616	chr13	26963145	26963154	+	52	NA	Intergenic	Intergenic	-162384	NR_046547	100874070		NR_046547		USP12-AS1	-	USP12 antisense RNA 1	ncRNA
46092	chr3	193845862	193846858	+	52	NA	Intergenic	Intergenic	-2351	NR_146718	105374285		NR_146718		LINC02038	-	long intergenic non-protein coding RNA 2038	ncRNA
58874	chr2	200376311	200376333	+	52	NA	intron (NM_001282743, intron 2 of 11)	intron (NM_001282743, intron 2 of 11)	67372	NM_001282744	26010		NM_015535	ENSG00000196141	SPATS2L	DNAPTP6|SGNP	spermatogenesis associated serine rich 2 like	protein-coding
41526	chr3	50295846	50296375	+	52	NA	TTS (NM_012191)	TTS (NM_012191)	2750	NM_001200018	24142		NM_012191	ENSG00000243477	NAA80	FUS-2|FUS2|HsNAAA80|NAT6	N-alpha-acetyltransferase 80, NatH catalytic subunit	protein-coding
25148	chr7	94703076	94703422	+	52	NA	Intergenic	AluSx1|SINE|Alu	46879	NM_001172438	23089		NM_015068	ENSG00000242265	PEG10	EDR|HB-1|MEF3L|Mar2|Mart2|RGAG3|RTL2|SIRH1	paternally expressed 10	protein-coding
28686	chr19	41411584	41412243	+	52	NA	intron (NM_001164783, intron 3 of 8)	intron (NM_001164783, intron 3 of 8)	14095	NM_001164783	593		NM_000709	ENSG00000248098	BCKDHA	BCKDE1A|MSU|MSUD1|MSUD1A|OVD1A	branched chain keto acid dehydrogenase E1 subunit alpha	protein-coding
102640	chr19	41318312	41318894	+	52	NA	intron (NM_001346100, intron 2 of 4)	intron (NM_001346100, intron 2 of 4)	8126	NM_001346100	90324		NM_052848	ENSG00000142039	CCDC97	-	coiled-coil domain containing 97	protein-coding
45097	chr3	8497722	8498222	+	52	NA	intron (NR_033378, intron 2 of 3)	L2a|LINE|L2	3686	NR_033378	100288428		NR_033378	ENSG00000227110	LMCD1-AS1	-	LMCD1 antisense RNA 1	ncRNA
26125	chr5	81300702	81300719	+	51	NA	promoter-TSS (NM_032280)	promoter-TSS (NM_032280)	859	NR_034122	100131067		NR_034121	ENSG00000247572	CKMT2-AS1	-	CKMT2 antisense RNA 1	ncRNA
50679	chr10	125059141	125059185	+	51	NA	intron (NM_001321013, intron 1 of 9)	intron (NM_001321013, intron 1 of 9)	-26293	NR_036178	100423041		NR_036178	ENSG00000264572	MIR4296	-	microRNA 4296	ncRNA
47910	chr19	10641605	10642308	+	51	NA	intron (NM_001363611, intron 20 of 22)	AluSx|SINE|Alu	11916	NR_024333	147727		NM_203300	ENSG00000267100	ILF3-DT	ILF3-AS1	ILF3 divergent transcript	ncRNA
38982	chr2	61472724	61472957	+	51	NA	Intergenic	Intergenic	-1753	NM_014709	9736		NM_014709	ENSG00000115464	USP34	-	ubiquitin specific peptidase 34	protein-coding
33913	chr3	72592393	72592481	+	51	NA	Intergenic	L2c|LINE|L2	71812	NR_135531	105377162		NR_135531		LOC105377162	-	uncharacterized LOC105377162	ncRNA
76452	chr19	19491389	19491551	+	51	NA	intron (NM_001384541, intron 2 of 10)	intron (NM_001384541, intron 2 of 10)	24078	NM_032037	83983		NM_032037	ENSG00000178093	TSSK6	CT72|FKSG82|SSTK|TSSK4	testis specific serine kinase 6	protein-coding
65012	chr1	156663275	156663964	+	51	NA	Intergenic	Intergenic	13788	NM_006617	10763		NM_006617	ENSG00000132688	NES	Nbla00170	nestin	protein-coding
25049	chr6	53062659	53062921	+	50	NA	promoter-TSS (NM_014920)	promoter-TSS (NM_014920)	-966	NM_016513	22858		NM_014920	ENSG00000112144	CILK1	ECO|EJM10|ICK|LCK2|MRK|hICK	ciliogenesis associated kinase 1	protein-coding
59706-2	chr1	204090978	204091612	+	50	NA	intron (NM_005686, intron 1 of 13)	intron (NM_005686, intron 1 of 13)	18180	NM_005686	9580		NM_005686	ENSG00000143842	SOX13	ICA12|Sox-13	SRY-box transcription factor 13	protein-coding
50525	chr1	155137249	155138162	+	50	NA	exon (NM_001287586, exon 3 of 5)	exon (NM_001287586, exon 3 of 5)	1853	NM_001287588	55974		NM_018845	ENSG00000169241	SLC50A1	HsSWEET1|RAG1AP1|SCP|SWEET1|slv	solute carrier family 50 member 1	protein-coding
33065	chr5	80091889	80092524	+	50	NA	Intergenic	AluSc8|SINE|Alu	-8541	NR_109930	101929215		NR_109930	ENSG00000249825	THBS4-AS1	CTD-2201I18.1	THBS4 antisense RNA 1	ncRNA
55774	chr7	130370831	130371093	+	50	NA	Intergenic	Intergenic	-3835	NR_133928	105375504		NR_133928		LOC105375504	-	uncharacterized LOC105375504	ncRNA
65965	chr11	102113090	102113463	+	50	NA	intron (NM_001195045, intron 1 of 8)	intron (NM_001195045, intron 1 of 8)	828	NM_001195045	10413		NM_006106	ENSG00000137693	YAP1	COB1|YAP|YAP-1|YAP2|YAP65|YKI	Yes1 associated transcriptional regulator	protein-coding
59706	chr1	204090666	204090821	+	50	NA	intron (NM_005686, intron 1 of 13)	intron (NM_005686, intron 1 of 13)	17628	NM_005686	9580		NM_005686	ENSG00000143842	SOX13	ICA12|Sox-13	SRY-box transcription factor 13	protein-coding
19215	chr18	74226033	74226203	+	50	NA	Intergenic	Intergenic	65845	NM_001914	1528		NM_001914	ENSG00000166347	CYB5A	CYB5|MCB5|METAG	cytochrome b5 type A	protein-coding
53402	chr10_KI270825v1_alt	131403	131418	+	50	NA	intron (NM_004747, intron 1 of 31)	L2c|LINE|L2	34037	NM_004747	9231		NM_004747	ENSG00000151208	DLG5	LP-DLG|P-DLG5|PDLG|YUVOB	discs large MAGUK scaffold protein 5	protein-coding
48857	chr1	9924399	9925037	+	49	NA	intron (NM_001316975, intron 7 of 7)	intron (NM_001316975, intron 7 of 7)	-14449	NM_001012329	56998		NM_020248	ENSG00000178585	CTNNBIP1	ICAT	catenin beta interacting protein 1	protein-coding
19800	chr1	179151182	179151276	+	49	NA	intron (NM_007314, intron 1 of 11)	intron (NM_007314, intron 1 of 11)	-8153	NM_001168239	27		NM_005158	ENSG00000143322	ABL2	ABLL|ARG	ABL proto-oncogene 2, non-receptor tyrosine kinase	protein-coding
98164	chr9	113375343	113375466	+	49	NA	intron (NM_001304511, intron 1 of 1)	MIR3|SINE|MIR	1196	NM_031219	81932		NM_031219	ENSG00000119431	HDHD3	2810435D12Rik|C9orf158	haloacid dehalogenase like hydrolase domain containing 3	protein-coding
27334	chr1	40710291	40710852	+	49	NA	intron (NM_001308115, intron 1 of 9)	intron (NM_001308115, intron 1 of 9)	1205	NM_001308115	4802		NM_014223	ENSG00000066136	NFYC	CBF-C|CBFC|H1TF2A|HAP5|HSM|NF-YC	nuclear transcription factor Y subunit gamma	protein-coding
33947	chr1	204269369	204269701	+	48	NA	intron (NM_014935, intron 3 of 22)	L2b|LINE|L2	-55547	NM_198447	127845		NM_198447	ENSG00000174567	GOLT1A	CGI-141|GOT1|GOT1B|HMFN1187|YMR292W|hGOT1b	golgi transport 1A	protein-coding
43949	chr7	47316084	47316496	+	48	NA	intron (NM_022748, intron 20 of 30)	intron (NM_022748, intron 20 of 30)	148513	NR_145813	109623468		NR_145813		SNORD151	-	small nucleolar RNA, C/D box 151	snoRNA
27675	chr19	49811312	49811762	+	48	NA	intron (NM_025129, intron 4 of 10)	intron (NM_025129, intron 4 of 10)	1755	NM_025129	80199		NM_025129	ENSG00000010361	FUZ	CPLANE3|FY|NTD	fuzzy planar cell polarity protein	protein-coding
38389	chr1	40921575	40922111	+	48	NA	Intergenic	Intergenic	-57853	NM_001905	1503		NM_001905	ENSG00000171793	CTPS1	CTPS|GATD5|GATD5A|IMD24	CTP synthase 1	protein-coding
26109	chr2	191022667	191023468	+	48	NA	intron (NR_136318, intron 1 of 2)	intron (NR_136318, intron 1 of 2)	1541	NR_136318	105373805		NR_136318	ENSG00000231858	STAT4-AS1	-	STAT4 antisense RNA 1	ncRNA
43407	chr17	7575239	7575927	+	47	NA	TTS (NR_002918)	TTS (NR_002918)	870	NR_002918	652965		NR_002918	ENSG00000209582	SNORA48	ACA48|SNORA48A	small nucleolar RNA, H/ACA box 48	snoRNA
30111	chr17	82274511	82275045	+	47	NA	Intergenic	Intergenic	-1028	NR_110578	1453		NM_001893	ENSG00000141551	CSNK1D	ASPS|CKI-delta|CKId|CKIdelta|FASPS2|HCKID	casein kinase 1 delta	protein-coding
56120	chr22	37629547	37630595	+	47	NA	exon (NM_001363771, exon 13 of 17)	exon (NM_001363771, exon 13 of 17)	-9598	NM_001350055	23616		NM_018957	ENSG00000100092	SH3BP1	ARHGAP43	SH3 domain binding protein 1	protein-coding
18029	chr3	72958345	72958873	+	47	NA	intron (NR_138564, intron 5 of 6)	intron (NR_138564, intron 5 of 6)	-38134	NM_001318026	151987		NM_174907	ENSG00000163605	PPP4R2	PP4R2	protein phosphatase 4 regulatory subunit 2	protein-coding
51281	chr11	57969597	57970392	+	47	NA	Intergenic	Intergenic	-53887	NM_001005212	219956		NM_001005212	ENSG00000186509	OR9Q1	-	olfactory receptor family 9 subfamily Q member 1	protein-coding
28898	chr14	67240455	67240510	+	47	NA	promoter-TSS (NM_022474)	promoter-TSS (NM_022474)	-953	NM_022474	64398		NM_022474	ENSG00000072415	PALS1	MPP5	protein associated with LIN7 1, MAGUK p55 family member	protein-coding
26582	chr6	96299446	96300262	+	46	NA	Intergenic	MER50|LTR|ERV1	-221952	NM_015323	23376		NM_015323	ENSG00000014123	UFL1	KIAA0776|Maxer|NLBP|RCAD	UFM1 specific ligase 1	protein-coding
47311	chr2	177600771	177601811	+	46	NA	Intergenic	Intergenic	17451	NM_152275	92104		NM_152275	ENSG00000197557	IFT70A	CFAP259|FAP259|TTC30A|TTC30B	intraflagellar transport 70A	protein-coding
34858	chr1	15618590	15618700	+	46	NA	intron (NM_032341, intron 1 of 9)	intron (NM_032341, intron 1 of 9)	1187	NM_032341	84301		NM_032341	ENSG00000197312	DDI2	-	DNA damage inducible 1 homolog 2	protein-coding
32183	chr12	127153706	127155109	+	46	NA	Intergenic	HERVH-int|LTR|ERV1	-94010	NR_104646	101927592		NR_104646	ENSG00000249345	LINC02405	-	long intergenic non-protein coding RNA 2405	ncRNA
52235-2	chr2	74462943	74463206	+	46	NA	intron (NM_006302, intron 3 of 3)	intron (NM_006302, intron 3 of 3)	2308	NM_006302	7841		NM_006302	ENSG00000115275	MOGS	CDG2B|CWH41|DER7|GCS1	mannosyl-oligosaccharide glucosidase	protein-coding
27481	chr2	224583974	224584738	+	46	NA	intron (NM_003590, intron 1 of 15)	AmnSINE1|SINE|5S-Deu-L2	1007	NM_003590	8452		NM_003590	ENSG00000036257	CUL3	CUL-3|NEDAUS|PHA2E	cullin 3	protein-coding
25382	chr11	74492352	74492434	+	46	NA	promoter-TSS (NM_001319240)	promoter-TSS (NM_001319240)	-992	NM_001319240	100287896		NM_198519	ENSG00000254837	LIPT2-AS1	-	LIPT2 antisense RNA 1	ncRNA
65170	chr2	230873069	230874028	+	46	NA	exon (NM_001012516, exon 2 of 5)	exon (NM_001012516, exon 2 of 5)	8598	NM_001012516	81618		NM_030926	ENSG00000135916	ITM2C	BRI3|BRICD2C|E25|E25C|ITM3	integral membrane protein 2C	protein-coding
52235	chr2	74460175	74460778	+	46	NA	TTS (NM_001146158)	TTS (NM_001146158)	2038	NM_012477	23559		NM_012477	ENSG00000239779	WBP1	WBP-1	WW domain binding protein 1	protein-coding
38724	chr14	24145523	24145873	+	46	NA	intron (NM_002818, intron 3 of 10)	intron (NM_002818, intron 3 of 10)	912	NM_002818	5721		NM_002818	ENSG00000100911	PSME2	PA28B|PA28beta|REGbeta	proteasome activator subunit 2	protein-coding
27113	chr1	16179942	16180401	+	45	NA	Intergenic	AluSz|SINE|Alu	-24102	NM_001329090	1969		NM_004431	ENSG00000142627	EPHA2	ARCC2|CTPA|CTPP1|CTRCT6|ECK	EPH receptor A2	protein-coding
85516	chr7	151056157	151056323	+	45	NA	intron (NM_004935, intron 5 of 11)	intron (NM_004935, intron 5 of 11)	1657	NM_004935	1020		NM_004935	ENSG00000164885	CDK5	LIS7|PSSALRE	cyclin dependent kinase 5	protein-coding
80530	chr12	52900956	52902505	+	45	NA	intron (NR_045962, intron 3 of 8)	MER94|DNA|hAT-Blackjack	-2746	NR_162090	113218482		NR_162090		MIR9898	-	microRNA 9898	ncRNA
46344	chr14	64718337	64718970	+	45	NA	intron (NM_001308147, intron 1 of 16)	MIR1_Amn|SINE|MIR	14229	NM_001308147	26030		NM_015549	ENSG00000126822	PLEKHG3	ARHGEF43|KIAA0599	pleckstrin homology and RhoGEF domain containing G3	protein-coding
89425	chr10	100994668	100994681	+	45	NA	TTS (NM_001163814)	TTS (NM_001163814)	-2397	NM_032429	84445		NM_032429	ENSG00000107816	LZTS2	LAPSER1	leucine zipper tumor suppressor 2	protein-coding
26085	chr22	37197139	37197635	+	45	NA	intron (NM_001365878, intron 2 of 4)	intron (NM_001365878, intron 2 of 4)	2036	NM_001365878	114904		NM_031910	ENSG00000133466	C1QTNF6	CTFP6|CTRP6|ZACRP6	C1q and TNF related 6	protein-coding
44819	chr2	47178048	47178365	+	45	NA	Intergenic	Intergenic	-1270	NM_001305625	805		NM_001743	ENSG00000143933	CALM2	CALM|CALML2|CAM1|CAM3|CAMC|CAMII|CAMIII|LQT15|PHKD|PHKD2|caM	calmodulin 2	protein-coding
74012	chr2	54555199	54556318	+	45	NA	intron (NM_003128, intron 2 of 35)	intron (NM_003128, intron 2 of 35)	-2636	NM_178313	6711		NM_003128	ENSG00000115306	SPTBN1	DDISBA|ELF|HEL102|SPTB2|betaSpII	spectrin beta, non-erythrocytic 1	protein-coding
41351	chr7	112204711	112204775	+	45	NA	intron (NM_014705, intron 1 of 51)	intron (NM_014705, intron 1 of 51)	1656	NM_014705	9732		NM_014705	ENSG00000128512	DOCK4	-	dedicator of cytokinesis 4	protein-coding
31498	chr8	8297185	8297571	+	45	NA	Intergenic	Intergenic	68808	NR_024361	286042		NR_024361	ENSG00000291049	FAM86B3P	-	family with sequence similarity 86, member A pseudogene	pseudo
55474	chr4	38135744	38136426	+	45	NA	intron (NM_015173, intron 19 of 19)	intron (NM_015173, intron 19 of 19)	16131	NM_001253915	23216		NM_015173	ENSG00000065882	TBC1D1	TBC|TBC1	TBC1 domain family member 1	protein-coding
34495	chr19	11736862	11737176	+	45	NA	intron (NM_001080493, intron 1 of 3)	intron (NM_001080493, intron 1 of 3)	1927	NM_001297610	55552		NM_017507	ENSG00000197933	ZNF823	HSZFP36	zinc finger protein 823	protein-coding
24927	chr4	158803667	158804529	+	45	NA	intron (NM_020840, intron 1 of 16)	AluSx1|SINE|Alu	-1741	NM_001366843	57600		NM_020840	ENSG00000052795	FNIP2	FNIPL|MAPO1	folliculin interacting protein 2	protein-coding
31511	chr3	12482669	12483476	+	45	NA	Intergenic	Intergenic	-1360	NM_001145393	80746		NM_025265	ENSG00000154743	TSEN2	PCH2B|SEN2|SEN2L	tRNA splicing endonuclease subunit 2	protein-coding
55474-2	chr4	38136719	38136999	+	45	NA	intron (NM_015173, intron 19 of 19)	intron (NM_015173, intron 19 of 19)	16905	NM_001253915	23216		NM_015173	ENSG00000065882	TBC1D1	TBC|TBC1	TBC1 domain family member 1	protein-coding
27365	chr17	76673085	76673466	+	44	NA	non-coding (NR_130916, exon 1 of 1)	non-coding (NR_130916, exon 1 of 1)	1347	NR_130916	105274304		NR_130916	ENSG00000261335	LOC105274304	-	uncharacterized LOC105274304	ncRNA
44070	chr10	133276307	133276332	+	44	NA	intron (NM_001109, intron 1 of 22)	intron (NM_001109, intron 1 of 22)	549	NM_001164489	101		NM_001109	ENSG00000151651	ADAM8	CD156|CD156a|MS2	ADAM metallopeptidase domain 8	protein-coding
33562	chr10	121929073	121929154	+	44	NA	promoter-TSS (NM_001288736)	promoter-TSS (NM_001288736)	-312	NM_001288736	11101		NM_007041	ENSG00000107669	ATE1	-	arginyltransferase 1	protein-coding
36965	chr8	66114679	66115169	+	44	NA	Intergenic	Intergenic	-12205	NM_184087	84675		NM_033058	ENSG00000147573	TRIM55	MURF-2|RNF29|muRF2	tripartite motif containing 55	protein-coding
44168	chr3	50244511	50245030	+	44	NA	intron (NM_001282618, intron 1 of 7)	intron (NM_001282618, intron 1 of 7)	-2140	NM_001166425	2771		NM_002070	ENSG00000114353	GNAI2	GIP|GNAI2B|HG1C|H_LUCA15.1|H_LUCA16.1	G protein subunit alpha i2	protein-coding
55225	chr5	172775138	172775962	+	44	NA	Intergenic	Intergenic	-4355	NM_004417	1843		NM_004417	ENSG00000120129	DUSP1	CL100|HVH1|MKP-1|MKP1|PTPN10	dual specificity phosphatase 1	protein-coding
44168-2	chr3	50247501	50248422	+	44	NA	intron (NM_001166425, intron 1 of 8)	AluSz|SINE|Alu	1051	NM_001166425	2771		NM_002070	ENSG00000114353	GNAI2	GIP|GNAI2B|HG1C|H_LUCA15.1|H_LUCA16.1	G protein subunit alpha i2	protein-coding
47299	chr16	30559288	30559772	+	44	NA	Intergenic	Intergenic	-1156	NM_001172679	92595		NM_033410	ENSG00000169951	ZNF764	-	zinc finger protein 764	protein-coding
41613	chr11	47270597	47271091	+	44	NA	promoter-TSS (NM_001376601)	promoter-TSS (NM_001376601)	-293	NM_001376601	8567		NM_003682	ENSG00000110514	MADD	DEEAH|DENN|IG20|NEDDISH|RAB3GEP|RabGEF	MAP kinase activating death domain	protein-coding
41613-2	chr11	47271283	47271291	+	44	NA	intron (NM_001376601, intron 1 of 34)	intron (NM_001376601, intron 1 of 34)	150	NM_001376601	8567		NM_003682	ENSG00000110514	MADD	DEEAH|DENN|IG20|NEDDISH|RAB3GEP|RabGEF	MAP kinase activating death domain	protein-coding
28430	chr1	153921530	153921617	+	44	NA	intron (NM_020699, intron 1 of 10)	intron (NM_020699, intron 1 of 10)	1399	NM_020699	57459		NM_020699	ENSG00000143614	GATAD2B	GANDS|MRD18|P66beta|p68	GATA zinc finger domain containing 2B	protein-coding
36028	chr10	45970817	45970822	+	43	NA	intron (NR_029388, intron 1 of 12)	L2b|LINE|L2	1555	NR_160519	114004351		NR_160518		PARGP1-AGAP4	-	PARGP1-AGAP4 readthrough	pseudo
25710	chr13	98417734	98417840	+	43	NA	intron (NM_001286839, intron 16 of 27)	intron (NM_001286839, intron 16 of 27)	104338	NM_003576	8428		NM_003576	ENSG00000102572	STK24	HEL-S-95|MST3|MST3B|STE20|STK3	serine/threonine kinase 24	protein-coding
26672	chr19	794305	795020	+	43	NA	Intergenic	AluSp|SINE|Alu	-2790	NM_031991	5725		NM_002819	ENSG00000011304	PTBP1	HNRNP-I|HNRNPI|HNRPI|PTB|PTB-1|PTB-T|PTB2|PTB3|PTB4|pPTB	polypyrimidine tract binding protein 1	protein-coding
28712	chr2	62706803	62707514	+	43	NA	5' UTR (NM_001354218, exon 2 of 23)	5' UTR (NM_001354218, exon 2 of 23)	261	NM_001354217	23301		NM_015252	ENSG00000115504	EHBP1	HPC12|NACSIN	EH domain binding protein 1	protein-coding
30372	chr5	147451732	147452606	+	43	NA	intron (NM_001197294, intron 1 of 13)	intron (NM_001197294, intron 1 of 13)	1523	NM_001387	1809		NM_001387	ENSG00000113657	DPYSL3	CRMP-4|CRMP4|DRP-3|DRP3|LCRMP|ULIP|ULIP-1	dihydropyrimidinase like 3	protein-coding
46173	chr3	129118790	129118844	+	43	NA	intron (NM_001204890, intron 11 of 12)	AluSz|SINE|Alu	2987	NM_001204886	339122		NM_198490	ENSG00000172780	RAB43	RAB11B|RAB41	RAB43, member RAS oncogene family	protein-coding
36949	chr17	43580113	43580209	+	43	NA	Intergenic	L1MD3|LINE|L1	-33821	NM_001261437	2118		NM_001986	ENSG00000175832	ETV4	E1A-F|E1AF|PEA3|PEAS3	ETS variant transcription factor 4	protein-coding
38536-2	chr22	50295409	50295685	+	42	NA	intron (NM_001376886, intron 1 of 36)	intron (NM_001376886, intron 1 of 36)	4788	NM_001376884	23654		NM_012401	ENSG00000196576	PLXNB2	MM1|Nbla00445|PLEXB2|dJ402G11.3|lncFAL	plexin B2	protein-coding
31108	chr22	23564132	23564935	+	42	NA	Intergenic	L2b|LINE|L2	15757	NM_001369906	3543		NM_020070	ENSG00000128322	IGLL1	14.1|AGM2|CD179b|IGL1|IGL5|IGLJ14.1|IGLL|IGO|IGVPB|VPREB2	immunoglobulin lambda like polypeptide 1	protein-coding
46084	chr16	58034481	58034950	+	42	NA	intron (NM_002428, intron 1 of 9)	intron (NM_002428, intron 1 of 9)	8961	NM_002428	4324		NM_002428	ENSG00000102996	MMP15	MMP-15|MT2-MMP|MT2MMP|MTMMP2|SMCP-2	matrix metallopeptidase 15	protein-coding
38536	chr22	50292444	50292601	+	42	NA	intron (NM_001376869, intron 1 of 35)	MIR|SINE|MIR	7813	NM_001376884	23654		NM_012401	ENSG00000196576	PLXNB2	MM1|Nbla00445|PLEXB2|dJ402G11.3|lncFAL	plexin B2	protein-coding
57155	chr17	27498134	27498258	+	42	NA	intron (NM_014238, intron 2 of 20)	AluSx1|SINE|Alu	26232	NM_014238	8844		NM_014238	ENSG00000141068	KSR1	KSR|RSU2	kinase suppressor of ras 1	protein-coding
18203	chr1	12656344	12656837	+	42	NA	intron (NM_001013630, intron 2 of 3)	intron (NM_001013630, intron 2 of 3)	12505	NM_001013630	343066		NM_001013630	ENSG00000204518	AADACL4	-	arylacetamide deacetylase like 4	protein-coding
27179	chr12	11811310	11811826	+	41	NA	intron (NM_001987, intron 2 of 7)	intron (NM_001987, intron 2 of 7)	161894	NM_001987	2120		NM_001987	ENSG00000139083	ETV6	TEL|TEL/ABL|THC5	ETS variant transcription factor 6	protein-coding
47873	chr8	101207452	101207632	+	41	NA	Intergenic	Intergenic	-1478	NM_001267709	51123		NM_016096	ENSG00000120963	ZNF706	HSPC038|PNAS-106|PNAS-113	zinc finger protein 706	protein-coding
37625	chr12	58918947	58918971	+	41	NA	intron (NM_153377, intron 1 of 18)	intron (NM_153377, intron 1 of 18)	587	NM_001136051	121227		NM_153377	ENSG00000139263	LRIG3	LIG3	leucine rich repeats and immunoglobulin like domains 3	protein-coding
24238	chr6	69795624	69795841	+	41	NA	intron (NM_018368, intron 1 of 15)	intron (NM_018368, intron 1 of 15)	734	NM_001363722	55788		NM_018368	ENSG00000168216	LMBRD1	C6orf209|LMBD1|MAHCF|NESI	LMBR1 domain containing 1	protein-coding
20969	chr3	59016267	59016727	+	41	NA	intron (NR_147235, intron 4 of 6)	L1MA5|LINE|L1	33528	NM_001351532	200844		NM_198463	ENSG00000163689	CFAP20DC	C3orf67	CFAP20 domain containing	protein-coding
34755	chr12	6870551	6870812	+	41	NA	TTS (NM_001319670)	TTS (NM_001319670)	2567	NM_001258026	7167		NM_000365	ENSG00000111669	TPI1	HEL-S-49|TIM|TPI|TPID	triosephosphate isomerase 1	protein-coding
114907	chr19	13156727	13156844	+	41	NA	Intergenic	AluSx1|SINE|Alu	6374	NM_004907	9592		NM_004907	ENSG00000160888	IER2	CHX1|ETR101	immediate early response 2	protein-coding
22247	chr19	1813864	1813934	+	41	NA	Intergenic	Intergenic	-1623	NM_001178002	148229		NM_138813	ENSG00000130270	ATP8B3	ATPIK	ATPase phospholipid transporting 8B3	protein-coding
34174	chr8	100471240	100471404	+	41	NA	Intergenic	Intergenic	88437	NM_198401	157567		NM_198401	ENSG00000186106	ANKRD46	ANK-S|GENX-115279	ankyrin repeat domain 46	protein-coding
47101	chr19	15381383	15381393	+	41	NA	intron (NM_014371, intron 12 of 13)	L1ME4c|LINE|L1	-1601	NM_005858	10270		NM_005858	ENSG00000105127	AKAP8	AKAP 95|AKAP-8|AKAP-95|AKAP95	A-kinase anchoring protein 8	protein-coding
17964	chr8	26295815	26297475	+	41	NA	intron (NM_002717, intron 2 of 9)	intron (NM_002717, intron 2 of 9)	3429	NM_001177591	5520		NM_002717	ENSG00000221914	PPP2R2A	B55A|B55ALPHA|PR52A|PR55A|PR55alpha	protein phosphatase 2 regulatory subunit Balpha	protein-coding
39173	chr7	100885620	100885741	+	40	NA	intron (NM_015908, intron 10 of 19)	intron (NM_015908, intron 10 of 19)	4035	NM_001015072	402682		NM_001015072	ENSG00000176125	UFSP1	UFSP	UFM1 specific peptidase 1 (inactive)	protein-coding
45812	chr3	39099167	39099880	+	40	NA	intron (NR_103866, intron 6 of 8)	intron (NR_103866, intron 6 of 8)	8104	NR_103866	64689		NM_031899	ENSG00000114745	GORASP1	GOLPH5|GRASP65|P65	golgi reassembly stacking protein 1	protein-coding
37893	chr15	25635266	25635630	+	40	NA	Intergenic	MLT1B|LTR|ERVL-MaLR	-196392	NM_000462	7337		NM_000462	ENSG00000114062	UBE3A	ANCR|AS|E6-AP|EPVE6AP|HPVE6A|PIX1	ubiquitin protein ligase E3A	protein-coding
24753	chr12	991311	991964	+	40	NA	intron (NR_027946, intron 1 of 18)	G-rich|Low_complexity|Low_complexity	414	NR_027949	23085		NM_178039	ENSG00000082805	ERC1	Cast2|ELKS|ERC-1|RAB6IP2	ELKS/RAB6-interacting/CAST family member 1	protein-coding
50963	chr18	28174793	28174903	+	40	NA	intron (NM_001792, intron 1 of 15)	intron (NM_001792, intron 1 of 15)	2282	NM_001792	1000		NM_001792	ENSG00000170558	CDH2	ACOGS|ADHD8|ARVD14|CD325|CDHN|CDw325|NCAD	cadherin 2	protein-coding
53879	chr1	109268065	109269145	+	40	NA	exon (NM_001408, exon 18 of 34)	exon (NM_001408, exon 18 of 34)	14539	NM_001350237	84722		NM_032636	ENSG00000134222	PSRC1	DDA3|FP3214	proline and serine rich coiled-coil 1	protein-coding
19069	chr17	8294303	8294635	+	40	NA	exon (NM_001320877, exon 1 of 4)	exon (NM_001320877, exon 1 of 4)	874	NM_001320877	399512		NM_201520	ENSG00000125434	SLC25A35	-	solute carrier family 25 member 35	protein-coding
24862	chr17	48909704	48910799	+	40	NA	intron (NM_023079, intron 1 of 6)	intron (NM_023079, intron 1 of 6)	-1268	NR_135674	105371814		NR_135674	ENSG00000293025	LOC105371814	-	uncharacterized LOC105371814	ncRNA
29292	chr19	8446197	8446291	+	40	NA	intron (NM_031203, intron 1 of 16)	L1MB4|LINE|L1	1269	NM_001297418	4670		NM_005968	ENSG00000099783	HNRNPM	CEAR|HNRNPM4|HNRPM|HNRPM4|HTGR1|NAGR1|hnRNP M	heterogeneous nuclear ribonucleoprotein M	protein-coding
45812-2	chr3	39100177	39101287	+	40	NA	intron (NR_103866, intron 5 of 8)	intron (NR_103866, intron 5 of 8)	6895	NR_103866	64689		NM_031899	ENSG00000114745	GORASP1	GOLPH5|GRASP65|P65	golgi reassembly stacking protein 1	protein-coding
29538	chr1	182389912	182390765	+	40	NA	intron (NM_001033044, intron 1 of 6)	intron (NM_001033044, intron 1 of 6)	1066	NM_001033056	2752		NM_002065	ENSG00000135821	GLUL	DEE116|GLNS|GS|PIG43|PIG59	glutamate-ammonia ligase	protein-coding
39173-2	chr7	100886389	100888532	+	40	NA	exon (NM_001128852, exon 16 of 20)	exon (NM_001128852, exon 16 of 20)	2255	NM_001015072	402682		NM_001015072	ENSG00000176125	UFSP1	UFSP	UFM1 specific peptidase 1 (inactive)	protein-coding
55034	chr7	32054890	32055487	+	40	NA	intron (NM_001322057, intron 2 of 17)	intron (NM_001322057, intron 2 of 17)	15219	NM_001191057	5137		NM_005020	ENSG00000154678	PDE1C	DFNA74|Hcam3|cam-PDE 1C|hCam-3	phosphodiesterase 1C	protein-coding
50296	chr6	41429690	41430140	+	39	NA	Intergenic	Intergenic	-72529	NR_120347	103106903		NR_120347	ENSG00000226917	LINC01276	-	long intergenic non-protein coding RNA 1276	ncRNA
43764	chr19	56145877	56145934	+	39	NA	intron (NM_018337, intron 1 of 4)	MLT1A|LTR|ERVL-MaLR	4618	NM_001253792	55311		NM_018337	ENSG00000167685	ZNF444	EZF-2|EZF2|ZSCAN17	zinc finger protein 444	protein-coding
27431	chr11	118530017	118530071	+	39	NA	promoter-TSS (NM_001346098)	promoter-TSS (NM_001346098)	-373	NM_001346098	143941		NM_001080441	ENSG00000172425	TTC36	HBP21	tetratricopeptide repeat domain 36	protein-coding
29108	chr10	121438409	121438991	+	39	NA	Intergenic	Intergenic	92614	NM_001320654	2263		NM_000141	ENSG00000066468	FGFR2	BBDS|BEK|BFR-1|CD332|CEK3|CFD1|ECT1|JWS|K-SAM|KGFR|TK14|TK25	fibroblast growth factor receptor 2	protein-coding
9436	chr12	32534887	32534912	+	39	NA	intron (NM_001385118, intron 1 of 16)	intron (NM_001385118, intron 1 of 16)	577	NM_001384130	121512		NM_139241	ENSG00000139132	FGD4	CMT4H|FRABP|ZFYVE6	FYVE, RhoGEF and PH domain containing 4	protein-coding
79037	chr18	22164829	22165521	+	39	NA	Intergenic	CpG	3793	NR_102763	100128893		NR_102763	ENSG00000266010	GATA6-AS1	BM742401|locus5689	GATA6 antisense RNA 1 (head to head)	ncRNA
31440	chr1	10034348	10034361	+	39	NA	intron (NM_001105562, intron 1 of 27)	intron (NM_001105562, intron 1 of 27)	1396	NM_001105562	10277		NM_006048	ENSG00000130939	UBE4B	E4|HDNB1|UBOX3|UFD2|UFD2A	ubiquitination factor E4B	protein-coding
27156	chr7	47620557	47621062	+	39	NA	Intergenic	AluSz|SINE|Alu	-1130	NR_108090	101929086		NR_108090	ENSG00000236078	LINC01447	-	long intergenic non-protein coding RNA 1447	ncRNA
56477	chr17	1713339	1713444	+	39	NA	TTS (NR_029494).2	TTS (NR_029494).2	596	NR_029494	407004		NR_029494	ENSG00000283824	MIR22	MIRN22|hsa-mir-22|miR-22	microRNA 22	ncRNA
14289-2	chr20	33490414	33490952	+	39	NA	intron (NM_001032999, intron 1 of 10)	intron (NM_001032999, intron 1 of 10)	587	NM_001032999	9139		NM_005093	ENSG00000078699	CBFA2T2	EHT|MTGR1|ZMYND3|p85	CBFA2/RUNX1 partner transcriptional co-repressor 2	protein-coding
27891	chr1	155014983	155015942	+	38	NA	exon (NM_001252406, exon 4 of 5)	exon (NM_001252406, exon 4 of 5)	12660	NM_001252406	51043		NM_001252406	ENSG00000160685	ZBTB7B	CKROX|THPOK|ZBTB15|ZFP-67|ZFP67|ZNF857B|c-KROX|hcKROX|vGAF	zinc finger and BTB domain containing 7B	protein-coding
48018	chr2	27375614	27376983	+	38	NA	TTS (NM_001201459)	TTS (NM_001201459)	4146	NM_001201459	130557		NM_144631	ENSG00000163795	ZNF513	HMFT0656|RP58|Zfp513	zinc finger protein 513	protein-coding
30462	chr8	8371305	8371838	+	38	NA	intron (NR_163138, intron 3 of 6)	intron (NR_163138, intron 3 of 6)	14673	NM_001369759	157285		NM_001080826	ENSG00000275342	PRAG1	NACK|PEAK2|PRAGMIN|SGK223	PEAK1 related, kinase-activating pseudokinase 1	protein-coding
49807	chr19	6219642	6221355	+	38	NA	intron (NM_005934, intron 6 of 11)	intron (NM_005934, intron 6 of 11)	59477	NM_005934	4298		NM_005934	ENSG00000130382	MLLT1	ENL|LTG19|YEATS1	MLLT1 super elongation complex subunit	protein-coding
5687	chr10	133786734	133786863	+	38	NA	Intergenic	TAR1|Satellite|telo	-160003	NM_001080998	441581		NM_001080998	ENSG00000225899	FRG2B	-	FSHD region gene 2 family member B	protein-coding
15693	chr8	66774112	66774644	+	38	NA	promoter-TSS (NM_013257)	promoter-TSS (NM_013257)	-803	NM_013257	23678		NM_013257	ENSG00000104205	SGK3	CISK|SGK2|SGKL	serum/glucocorticoid regulated kinase family member 3	protein-coding
17923	chr11	66001518	66001636	+	38	NA	promoter-TSS (NM_001143985)	promoter-TSS (NM_001143985)	-502	NM_001143985	8815		NM_003860	ENSG00000175334	BANF1	BAF|BCRP1|D14S1460|NGPS	BAF nuclear assembly factor 1	protein-coding
12452	chr9	116870207	116870334	+	37	NA	intron (NM_014010, intron 9 of 21)	MIRb|SINE|MIR	182701	NM_001379050	22954		NM_012210	ENSG00000119401	TRIM32	BBS11|HT2A|LGMD2H|LGMDR8|TATIP	tripartite motif containing 32	protein-coding
40162	chr11	59757406	59757852	+	37	NA	intron (NM_004177, intron 1 of 10)	intron (NM_004177, intron 1 of 10)	2253	NM_001178040	6809		NM_004177	ENSG00000166900	STX3	DIAR12|MVID2|RDMVID|STX3A	syntaxin 3	protein-coding
21664	chr17	76263479	76264272	+	37	NA	Intergenic	AluJo|SINE|Alu	-1473	NM_182565	283991		NM_182565	ENSG00000185262	UBALD2	FAM100B	UBA like domain containing 2	protein-coding
19817	chr16	28845111	28845781	+	37	NA	exon (NM_001365360, exon 3 of 10)	exon (NM_001365360, exon 3 of 10)	902	NM_003321	7284		NM_003321	ENSG00000178952	TUFM	COXPD4|EF-TuMT|EFTU|P43	Tu translation elongation factor, mitochondrial	protein-coding
40162-2	chr11	59758224	59759328	+	37	NA	intron (NM_004177, intron 1 of 10)	intron (NM_004177, intron 1 of 10)	3400	NM_001178040	6809		NM_004177	ENSG00000166900	STX3	DIAR12|MVID2|RDMVID|STX3A	syntaxin 3	protein-coding
38626	chr5	54311535	54312298	+	37	NA	Intergenic	Tigger10|DNA|TcMar-Tigger	-1343	NM_019087	54622		NM_019087	ENSG00000185305	ARL15	ARFRP2	ADP ribosylation factor like GTPase 15	protein-coding
30597	chr12	49365533	49365843	+	37	NA	Intergenic	Intergenic	-1774	NM_001293286	65244		NM_023071	ENSG00000123352	SPATS2	Nbla00526|P59SCR|SCR59|SPATA10	spermatogenesis associated serine rich 2	protein-coding
21140	chr2	164621682	164623293	+	37	NA	Intergenic	Intergenic	-1005	NM_004490	2888		NM_004490	ENSG00000115290	GRB14	-	growth factor receptor bound protein 14	protein-coding
23399	chr3	71133152	71133176	+	37	NA	promoter-TSS (NM_001349342)	promoter-TSS (NM_001349342)	-967	NM_001349342	27086		NM_032682	ENSG00000114861	FOXP1	12CC4|HSPC215|MFH|QRF1|hFKH1B	forkhead box P1	protein-coding
21948	chr16	74607596	74607673	+	37	NA	promoter-TSS (NR_027265)	promoter-TSS (NR_027265)	-520	NM_001145666	2734		NM_012201	ENSG00000090863	GLG1	CFR-1|ESL-1|MG-160|MG160	golgi glycoprotein 1	protein-coding
33309	chr17	18256570	18257142	+	36	NA	intron (NM_001256265, intron 2 of 28).2	intron (NM_001256265, intron 2 of 28).2	1882	NM_001256265	2314		NM_002018	ENSG00000177731	FLII	CMD2J|FLI|FLIL|Fli1	FLII actin remodeling protein	protein-coding
25308	chr8	6902514	6902587	+	36	NA	Intergenic	Intergenic	23526	NM_001926	1671		NM_001926	ENSG00000164822	DEFA6	DEF6|HD-6	defensin alpha 6	protein-coding
71425	chr17	17596931	17596936	+	36	NA	Intergenic	AluSx|SINE|Alu	-5225	NM_148172	10400		NM_007169	ENSG00000133027	PEMT	PEAMT|PEMPT|PEMT2|PLMT|PNMT	phosphatidylethanolamine N-methyltransferase	protein-coding
16840	chr22	40733483	40733823	+	36	NA	Intergenic	AluSz|SINE|Alu	54169	NM_005297	2847		NM_005297	ENSG00000128285	MCHR1	GPR24|MCH-1R|MCH1R|SLC-1|SLC1	melanin concentrating hormone receptor 1	protein-coding
21601	chr15	90390399	90391192	+	36	NA	exon (NM_003870, exon 2 of 38)	exon (NM_003870, exon 2 of 38)	2553	NM_003870	8826		NM_003870	ENSG00000140575	IQGAP1	HUMORFA01|SAR1|p195	IQ motif containing GTPase activating protein 1	protein-coding
30035	chr16	2266974	2267508	+	36	NA	promoter-TSS (NM_001286625)	promoter-TSS (NM_001286625)	96	NM_001286625	10921		NM_006711	ENSG00000205937	RNPS1	E5.1	RNA binding protein with serine rich domain 1	protein-coding
30693	chr11	64228826	64228909	+	36	NA	intron (NM_032344, intron 3 of 5)	AluSx|SINE|Alu	-1414	NM_005528	3338		NM_005528	ENSG00000110011	DNAJC4	DANJC4|HSPF2|MCG18	DnaJ heat shock protein family (Hsp40) member C4	protein-coding
25113	chr1	155083289	155083849	+	36	NA	intron (NM_004952, intron 1 of 4)	intron (NM_004952, intron 1 of 4)	4732	NM_004952	1944		NM_004952	ENSG00000143590	EFNA3	EFL2|EPLG3|Ehk1-L|LERK3	ephrin A3	protein-coding
32866	chr4	2910196	2910204	+	36	NA	intron (NM_001354756, intron 13 of 15)	intron (NM_001354756, intron 13 of 15)	24037	NM_001120	10227		NM_001120	ENSG00000109736	MFSD10	TETRAN|TETTRAN	major facilitator superfamily domain containing 10	protein-coding
29799	chr19	14138261	14138280	+	36	NA	intron (NR_045214, intron 1 of 2)	AluJr|SINE|Alu	1118	NR_045214	100507373		NR_045214	ENSG00000267169	ADGRL1-AS1	-	ADGRL1 antisense RNA 1	ncRNA
24751	chr5	140558895	140558903	+	36	NA	promoter-TSS (NR_045586)	promoter-TSS (NR_045586)	-806	NR_045586	10011		NM_001035235	ENSG00000213523	SRA1	SRA|SRAP|STRAA1|pp7684	steroid receptor RNA activator 1	protein-coding
53827	chr11	47180901	47181253	+	36	NA	intron (NM_016223, intron 4 of 10)	AluSc8|SINE|Alu	-1340	NR_106803	102466726		NR_106803	ENSG00000275208	MIR6745	hsa-mir-6745	microRNA 6745	ncRNA
21390	chr19	41882344	41883110	+	35	NA	promoter-TSS (NM_198977)	promoter-TSS (NM_198977)	-457	NM_004706	9138		NM_004706	ENSG00000076928	ARHGEF1	GEF1|IMD62|LBCL2|LSC|P115-RHOGEF|SUB1.5	Rho guanine nucleotide exchange factor 1	protein-coding
27318	chr16	637713	637980	+	35	NA	intron (NR_149003, intron 1 of 3)	intron (NR_149003, intron 1 of 3)	894	NR_149003	100287175		NR_149003		LOC100287175	-	uncharacterized LOC100287175	ncRNA
23990	chr3	129793160	129793671	+	35	NA	intron (NM_001349271, intron 2 of 4)	intron (NM_001349271, intron 2 of 4)	1197	NM_001349273	23023		NM_015008	ENSG00000172765	TMCC1	-	transmembrane and coiled-coil domain family 1	protein-coding
23447	chr7	30029661	30029840	+	35	NA	intron (NM_032639, intron 1 of 12)	intron (NM_032639, intron 1 of 12)	1338	NM_032639	84725		NM_032639	ENSG00000106086	PLEKHA8	FAPP2	pleckstrin homology domain containing A8	protein-coding
28091	chr12	102916548	102916600	+	35	NA	intron (NM_001354304, intron 2 of 13)	intron (NM_001354304, intron 2 of 13)	670	NM_000277	5053		NM_000277	ENSG00000171759	PAH	PH|PKU|PKU1	phenylalanine hydroxylase	protein-coding
28493	chr4	78535457	78536294	+	35	NA	intron (NM_025074, intron 71 of 73)	L2b|LINE|L2	-15895	NM_005139	306		NM_005139	ENSG00000138772	ANXA3	ANX3	annexin A3	protein-coding
26779	chr11	12475307	12476045	+	35	NA	intron (NM_018222, intron 3 of 12)	intron (NM_018222, intron 3 of 12)	98105	NM_018222	55742		NM_018222	ENSG00000197702	PARVA	CH-ILKBP|MXRA2	parvin alpha	protein-coding
22371	chr6	138230747	138230750	+	35	NA	intron (NM_020340, intron 5 of 33)	intron (NM_020340, intron 5 of 33)	-12258	NM_021635	59351		NM_021635	ENSG00000254440	PBOV1	UC28|UROC28|dJ171N11.2	prostate and breast cancer overexpressed 1	protein-coding
38804	chr10	102422411	102423193	+	35	NA	TTS (NM_024040)	TTS (NM_024040)	-2868	NM_001270965	5662		NM_002779	ENSG00000059915	PSD	EFA6|EFA6A|PSD1|TYL	pleckstrin and Sec7 domain containing	protein-coding
23132	chr10	74928765	74929117	+	35	NA	intron (NR_134476, intron 1 of 1)	intron (NR_134476, intron 1 of 1)	16155	NR_134476
30090	chr10	30071338	30071751	+	35	NA	intron (NM_001350022, intron 1 of 4)	AluSx|SINE|Alu	-11958	NM_001350001	57608		NM_020848	ENSG00000165757	JCAD	KIAA1462	junctional cadherin 5 associated	protein-coding
30118	chr15	53557649	53558498	+	35	NA	intron (NR_102334, intron 18 of 19)	intron (NR_102334, intron 18 of 19)	-16970	NR_102335	256764		NM_182758	ENSG00000166415	WDR72	AI2A3	WD repeat domain 72	protein-coding
34053	chr19	6461413	6462779	+	35	NA	Intergenic	Intergenic	-1681	NM_174882	92359		NM_139161	ENSG00000130545	CRB3	-	crumbs cell polarity complex component 3	protein-coding
25467	chr20	17609386	17609778	+	35	NA	3' UTR (NM_001011546, exon 5 of 5)	3' UTR (NM_001011546, exon 5 of 5)	39507	NM_006870	11034		NM_006870	ENSG00000125868	DSTN	ACTDP|ADF|HEL32|bA462D18.2	destrin, actin depolymerizing factor	protein-coding
19486	chr3	119239409	119239412	+	35	NA	intron (NM_212543, intron 1 of 8)	intron (NM_212543, intron 1 of 8)	1468	NM_003778	8702		NM_003778	ENSG00000121578	B4GALT4	B4Gal-T4|beta4Gal-T4	beta-1,4-galactosyltransferase 4	protein-coding
33520	chr7	29192772	29193386	+	34	NA	intron (NM_001371255, intron 1 of 18)	intron (NM_001371255, intron 1 of 18)	-1426	NM_001293071	1124		NM_004067	ENSG00000106069	CHN2	ARHGAP3|BCH|CHN2-3|RHOGAP3	chimerin 2	protein-coding
12687	chr6	116946420	116946758	+	34	NA	Intergenic	L2|LINE|L2	69347	NM_173560	222546		NM_173560	ENSG00000185002	RFX6	MTCHRS|MTFS|RFXDC1|dJ955L16.1	regulatory factor X6	protein-coding
26651	chr9	4259526	4259766	+	34	NA	intron (NM_001042413, intron 2 of 10)	intron (NM_001042413, intron 2 of 10)	40422	NM_001042413	169792		NM_152629	ENSG00000107249	GLIS3	NDH|ZNF515	GLIS family zinc finger 3	protein-coding
20209	chr1	84688788	84689496	+	34	NA	intron (NM_014021, intron 1 of 14)	intron (NM_014021, intron 1 of 14)	1319	NM_001166417	117178		NM_014021	ENSG00000117155	SSX2IP	ADIP|hMsd1	SSX family member 2 interacting protein	protein-coding
17061	chr1	227789407	227789752	+	34	NA	non-coding (NR_168380, exon 2 of 2)	non-coding (NR_168380, exon 2 of 2)	1059	NR_168384	105373289		NR_168380	ENSG00000286389	LOC105373289	-	LOC105373289	ncRNA
34148	chr4	123400830	123401221	+	34	NA	intron (NM_005841, intron 1 of 1)	intron (NM_005841, intron 1 of 1)	1485	NM_005841	10252		NM_005841	ENSG00000164056	SPRY1	hSPRY1	sprouty RTK signaling antagonist 1	protein-coding
28731	chr5	139340214	139340648	+	34	NA	Intergenic	Intergenic	-1401	NR_109830	51247		NM_016480	ENSG00000120727	PAIP2	PAIP-2|PAIP2A	poly(A) binding protein interacting protein 2	protein-coding
24454	chr10	63522713	63522783	+	34	NA	promoter-TSS (NM_001318154)	promoter-TSS (NM_001318154)	-858	NM_001318154	221037		NM_004241	ENSG00000171988	JMJD1C	KDM3C|TRIP-8|TRIP8	jumonji domain containing 1C	protein-coding
33152	chr19	1602677	1603598	+	34	NA	intron (NM_006830, intron 1 of 2)	intron (NM_006830, intron 1 of 2)	2325	NM_006830	10975		NM_006830	ENSG00000127540	UQCR11	0710008D09Rik|QCR10|UQCR	ubiquinol-cytochrome c reductase, complex III subunit XI	protein-coding
18352	chr12	115420233	115421232	+	34	NA	Intergenic	L2b|LINE|L2	727922	NR_030351	693205		NR_030351	ENSG00000207967	MIR620	MIRN620|hsa-mir-620	microRNA 620	ncRNA
37547	chr20	11938172	11938642	+	34	NA	Intergenic	Intergenic	20514	NM_014962	22903		NM_014962	ENSG00000132640	BTBD3	dJ742J24.1	BTB domain containing 3	protein-coding
32308	chr19	1028731	1029368	+	34	NA	intron (NM_201277, intron 1 of 5)	intron (NM_201277, intron 1 of 5)	2441	NM_004368	1265		NM_004368	ENSG00000064666	CNN2	-	calponin 2	protein-coding
40267	chr14	50063436	50063476	+	34	NA	intron (NR_131171, intron 2 of 8)	L1M5|LINE|L1	41587	NR_131171	196913		NM_001014830	ENSG00000214900	LINC01599	C14orf183	long intergenic non-protein coding RNA 1599	ncRNA
17140	chr11	119017595	119017603	+	34	NA	intron (NM_001028, intron 2 of 4).2	intron (NM_001028, intron 2 of 4).2	744	NM_001028	6230		NM_001028	ENSG00000118181	RPS25	S25|eS25	ribosomal protein S25	protein-coding
60976	chr5	176532689	176533545	+	34	NA	intron (NM_014901, intron 1 of 10)	intron (NM_014901, intron 1 of 10)	4285	NM_014901	22838		NM_014901	ENSG00000146083	RNF44	-	ring finger protein 44	protein-coding
33471	chr6	41570923	41571156	+	34	NA	intron (NM_138457, intron 2 of 16)	intron (NM_138457, intron 2 of 16)	-22418	NR_126415	101060264		NR_126415	ENSG00000234753	FOXP4-AS1	-	FOXP4 antisense RNA 1	ncRNA
49994	chr6	34231365	34231437	+	34	NA	Intergenic	AluSp|SINE|Alu	-5472	NM_001319078	3159		NM_002131	ENSG00000137309	HMGA1	HMG-R|HMGA1A|HMGIY	high mobility group AT-hook 1	protein-coding
37009	chr10	103510037	103510745	+	34	NA	intron (NR_120675, intron 2 of 3)	intron (NR_120675, intron 2 of 3)	7051	NR_120676	102724341		NR_120675	ENSG00000235470	NEURL1-AS1	-	NEURL1 antisense RNA 1	ncRNA
23195	chr10	79262464	79262486	+	34	NA	intron (NM_020338, intron 7 of 24)	intron (NM_020338, intron 7 of 24)	-84994	NM_005729	10105		NM_005729	ENSG00000108179	PPIF	CYP3|CyP-M|Cyp-D|CypD	peptidylprolyl isomerase F	protein-coding
23173	chr4	2924506	2924895	+	33	NA	intron (NM_176801, intron 13 of 15)	intron (NM_176801, intron 13 of 15)	9537	NM_001120	10227		NM_001120	ENSG00000109736	MFSD10	TETRAN|TETTRAN	major facilitator superfamily domain containing 10	protein-coding
56110-2	chr19	46358814	46359216	+	33	NA	intron (NM_001204284, intron 2 of 11)	LTR56|LTR|ERV1	11928	NM_006247	5536		NM_006247	ENSG00000011485	PPP5C	PP5|PPP5|PPT	protein phosphatase 5 catalytic subunit	protein-coding
30996	chr3	100101583	100102248	+	33	NA	intron (NM_182909, intron 1 of 5)	L1PA4|LINE|L1	12598	NM_182909	11259		NM_014890	ENSG00000168386	FILIP1L	DOC-1|DOC1|GIP130|GIP90	filamin A interacting protein 1 like	protein-coding
37246	chr1	6601342	6601444	+	33	NA	intron (NM_014851, intron 1 of 3)	intron (NM_014851, intron 1 of 3)	1476	NM_014851	9903		NM_014851	ENSG00000162413	KLHL21	-	kelch like family member 21	protein-coding
24652-2	chr11	822396	822679	+	33	NA	exon (NM_020376, exon 5 of 10)	exon (NM_020376, exon 5 of 10)	3623	NM_020376	57104		NM_020376	ENSG00000177666	PNPLA2	1110001C14Rik|ATGL|FP17548|PEDF-R|TTS-2.2|TTS2|iPLA2zeta	patatin like phospholipase domain containing 2	protein-coding
25587	chr17	2302596	2302661	+	33	NA	intron (NM_017575, intron 1 of 18)	intron (NM_017575, intron 1 of 18)	1157	NM_017575	23293		NM_017575	ENSG00000070366	SMG6	C17orf31|EST1A|SMG-6|hEST1A|hSMG5/7a	SMG6 nonsense mediated mRNA decay factor	protein-coding
12712	chr9	96390926	96390974	+	33	NA	intron (NM_153695, intron 4 of 4)	intron (NM_153695, intron 4 of 4)	-7239	NM_001286990	11046		NM_007001	ENSG00000130958	SLC35D2	HFRC1|SQV7L|UGTrel8|hfrc	solute carrier family 35 member D2	protein-coding
26934	chr8	144828851	144828908	+	33	NA	intron (NM_001349805, intron 1 of 2)	intron (NM_001349805, intron 1 of 2)	1319	NM_001349809	7553		NM_003416	ENSG00000147789	ZNF7	HF.16|KOX4|zf30	zinc finger protein 7	protein-coding
56110	chr19	46352204	46352793	+	33	NA	intron (NM_001204284, intron 1 of 11)	intron (NM_001204284, intron 1 of 11)	5411	NM_006247	5536		NM_006247	ENSG00000011485	PPP5C	PP5|PPP5|PPT	protein phosphatase 5 catalytic subunit	protein-coding
28386	chr1	23801853	23802241	+	33	NA	3' UTR (NM_000191, exon 9 of 9)	3' UTR (NM_000191, exon 9 of 9)	-1293	NM_001008216	2582		NM_000403	ENSG00000117308	GALE	SDR1E1|THC13	UDP-galactose-4-epimerase	protein-coding
20252	chr11	64307275	64307282	+	33	NA	exon (NM_001282451, exon 2 of 7)	exon (NM_001282451, exon 2 of 7)	1051	NM_001282450	2101		NM_004451	ENSG00000173153	ESRRA	ERR1|ERRa|ERRalpha|ESRL1|NR3B1	estrogen related receptor alpha	protein-coding
34819	chr9	128682720	128682931	+	33	NA	promoter-TSS (NM_001122821)	promoter-TSS (NM_001122821)	-599	NM_001374326	6418		NM_003011	ENSG00000119335	SET	2PP2A|I2PP2A|IGAAD|IPP2A2|MRD58|PHAPII|TAF-I|TAF-IBETA	SET nuclear proto-oncogene	protein-coding
24652	chr11	820899	821571	+	33	NA	intron (NM_020376, intron 2 of 9)	intron (NM_020376, intron 2 of 9)	2321	NM_020376	57104		NM_020376	ENSG00000177666	PNPLA2	1110001C14Rik|ATGL|FP17548|PEDF-R|TTS-2.2|TTS2|iPLA2zeta	patatin like phospholipase domain containing 2	protein-coding
13868	chr4	183620276	183620623	+	33	NA	Intergenic	MER3|DNA|hAT-Charlie	38736	NM_001307922	201965		NM_152682	ENSG00000182552	RWDD4	FAM28A|RWDD4A	RWD domain containing 4	protein-coding
22654	chr3	72522058	72522762	+	33	NA	Intergenic	L1ME3|LINE|L1	-75787	NM_012234	23429		NM_012234	ENSG00000163602	RYBP	AAP1|APAP-1|DEDAF|YEAF1	RING1 and YY1 binding protein	protein-coding
20144	chr3	14433738	14433794	+	33	NA	intron (NM_001134367, intron 2 of 14)	AluSx1|SINE|Alu	31160	NM_001134368	6533		NM_003043	ENSG00000131389	SLC6A6	HTRDC|TAUT	solute carrier family 6 member 6	protein-coding
25951	chr19	18277613	18278511	+	33	NA	Intergenic	MIRb|SINE|MIR	3560	NM_005354	3727		NM_005354	ENSG00000130522	JUND	AP-1	JunD proto-oncogene, AP-1 transcription factor subunit	protein-coding
27082	chr1	206953057	206953104	+	33	NA	Intergenic	Intergenic	-6614	NM_002644	5284		NM_002644	ENSG00000162896	PIGR	-	polymeric immunoglobulin receptor	protein-coding
49356	chr8	29976802	29977138	+	32	NA	Intergenic	Intergenic	-19622	NR_036104	100422876		NR_036104	ENSG00000264788	MIR3148	mir-3148	microRNA 3148	ncRNA
10874	chr12	71755740	71755910	+	32	NA	intron (NM_014999, intron 1 of 6)	intron (NM_014999, intron 1 of 6)	962	NM_014999	23011		NM_014999	ENSG00000080371	RAB21	-	RAB21, member RAS oncogene family	protein-coding
25820	chr19	2988842	2988988	+	32	NA	intron (NM_001143986, intron 11 of 16)	intron (NM_001143986, intron 11 of 16)	11351	NM_001143986	79816		NM_024760	ENSG00000104953	TLE6	GRG6|OZEMA15|PREMBL	TLE family member 6, subcortical maternal complex member	protein-coding
20965	chr6	12545278	12545409	+	32	NA	Intergenic	Intergenic	40061	NR_149140	101928309		NR_149140	ENSG00000234015	LINC02530	-	long intergenic non-protein coding RNA 2530	ncRNA
24471	chr14	85480415	85480653	+	32	NA	Intergenic	Intergenic	-49491	NR_144386	23768		NM_013231	ENSG00000185070	FLRT2	-	fibronectin leucine rich transmembrane protein 2	protein-coding
21496	chr12	124747179	124747234	+	32	NA	Intergenic	Intergenic	92465	NM_001367982	949		NM_005505	ENSG00000073060	SCARB1	CD36L1|CLA-1|CLA1|HDLCQ6|HDLQTL6|SR-BI|SRB1	scavenger receptor class B member 1	protein-coding
17556	chr14	100020250	100020492	+	32	NA	intron (NM_001330221, intron 1 of 13)	intron (NM_001330221, intron 1 of 13)	-45051	NM_016337	51466		NM_016337	ENSG00000196405	EVL	RNB6	Enah/Vasp-like	protein-coding
17036	chr5	88269264	88269631	+	32	NA	promoter-TSS (NM_001349402)	promoter-TSS (NM_001349402)	431	NR_039994	100505894		NR_039993	ENSG00000247828	TMEM161B-DT	TMEM161B-AS1|linc-POLR3G-8	TMEM161B divergent transcript	ncRNA
26756	chr11	58926986	58926995	+	32	NA	promoter-TSS (NM_001220494)	promoter-TSS (NM_001220494)	-639	NM_001220494	92292		NM_080661	ENSG00000166840	GLYATL1	GATF-C|GNAT	glycine-N-acyltransferase like 1	protein-coding
34604-2	chr22	38222556	38222747	+	32	NA	intron (NM_001195071, intron 8 of 8)	intron (NM_001195071, intron 8 of 8)	2069	NR_132774	106635525		NR_132774		SNORA92	-	small nucleolar RNA, H/ACA box 92	snoRNA
19668	chr11	65119521	65119856	+	32	NA	TTS (NM_001997)	TTS (NM_001997)	-1987	NM_014205	741		NM_014205	ENSG00000174276	ZNHIT2	C11orf5|FON	zinc finger HIT-type containing 2	protein-coding
21199	chr14	55189475	55190218	+	32	NA	intron (NM_014750, intron 1 of 18)	MER21B|LTR|ERVL	1739	NM_001146015	9787		NM_014750	ENSG00000126787	DLGAP5	DLG7|HURP	DLG associated protein 5	protein-coding
13811	chr6	143679208	143679546	+	32	NA	intron (NM_001100165, intron 1 of 11)	intron (NM_001100165, intron 1 of 11)	1412	NM_001100165	9749		NM_014721	ENSG00000112419	PHACTR2	C6orf56	phosphatase and actin regulator 2	protein-coding
15981	chr16	46882894	46883034	+	32	NA	Intergenic	Intergenic	-1398	NM_133443	84706		NM_133443	ENSG00000166123	GPT2	ALT2|GPT 2|MRT49|NEDSPM	glutamic--pyruvic transaminase 2	protein-coding
34604	chr22	38221286	38222414	+	32	NA	intron (NM_001195071, intron 8 of 8)	intron (NM_001195071, intron 8 of 8)	2870	NR_132774	106635525		NR_132774		SNORA92	-	small nucleolar RNA, H/ACA box 92	snoRNA
23503	chr7	502818	502916	+	32	NA	intron (NM_033023, intron 4 of 5)	intron (NM_033023, intron 4 of 5)	16977	NM_002607	5154		NM_002607	ENSG00000197461	PDGFA	PDGF-A|PDGF1	platelet derived growth factor subunit A	protein-coding
8387	chr11	120391204	120392565	+	32	NA	intron (NM_001301084, intron 1 of 40)	intron (NM_001301084, intron 1 of 40)	6557	NM_001301084	23365		NM_015313	ENSG00000196914	ARHGEF12	LARG|PRO2792	Rho guanine nucleotide exchange factor 12	protein-coding
50549	chr17	72123993	72124694	+	32	NA	exon (NM_000346, exon 3 of 3)	exon (NM_000346, exon 3 of 3)	3323	NM_000346	6662		NM_000346	ENSG00000125398	SOX9	CMD1|CMPD1|SRA1|SRXX2|SRXY10	SRY-box transcription factor 9	protein-coding
48146	chr19	48639624	48640194	+	32	NA	intron (NR_136241, intron 4 of 8)	intron (NR_136241, intron 4 of 8)	1870	NR_004401	653677		NR_004401	ENSG00000293426	SEC1P	SEC1	secretory blood group 1, pseudogene	pseudo
13477	chr9	121650742	121650847	+	31	NA	intron (NM_032552, intron 1 of 16)	intron (NM_032552, intron 1 of 16)	83692	NM_032552	153090		NM_032552	ENSG00000136848	DAB2IP	AF9Q34|AIP-1|AIP1|DIP1/2	DAB2 interacting protein	protein-coding
15142	chr1	204447597	204447666	+	31	NA	intron (NM_001377335, intron 16 of 35)	intron (NM_001377335, intron 16 of 35)	-35814	NM_032833	84919		NM_032833	ENSG00000158615	PPP1R15B	CREP|MSSGM2	protein phosphatase 1 regulatory subunit 15B	protein-coding
23333	chr19	45578507	45579078	+	31	NA	intron (NM_025136, intron 1 of 1)	AluSp|SINE|Alu	6010	NM_025136	80207		NM_025136	ENSG00000125741	OPA3	MGA3	outer mitochondrial membrane lipid metabolism regulator OPA3	protein-coding
63281	chr18	8958059	8958591	+	31	NA	Intergenic	Intergenic	-144374	NM_021074	4729		NM_021074	ENSG00000178127	NDUFV2	CI-24k|MC1DN7	NADH:ubiquinone oxidoreductase core subunit V2	protein-coding
15103	chr5	30503771	30506063	+	31	NA	Intergenic	Intergenic	624357	NR_134264	105374704		NR_134264		LOC105374704	-	uncharacterized LOC105374704	ncRNA
17995	chr7	6827061	6827303	+	31	NA	promoter-TSS (NM_198097)	promoter-TSS (NM_198097)	-907	NM_198097	221960		NM_198097	ENSG00000146574	CCZ1B	C7orf28A|C7orf28B|CCZ1|H_NH0577018.2	CCZ1 homolog B, vacuolar protein trafficking and biogenesis associated	protein-coding
27809	chr5	145980937	145982976	+	31	NA	intron (NM_152550, intron 2 of 9)	intron (NM_152550, intron 2 of 9)	45378	NM_152550	153769		NM_152550	ENSG00000156463	SH3RF2	HEPP1|POSHER|PPP1R39|RNF158	SH3 domain containing ring finger 2	protein-coding
14187	chr2	167197985	167198731	+	31	NA	intron (NM_001199145, intron 1 of 7)	intron (NM_001199145, intron 1 of 7)	10986	NM_001199145	129446		NM_152381	ENSG00000163092	XIRP2	CMYA3	xin actin binding repeat containing 2	protein-coding
13114-2	chr16	3717509	3718282	+	31	NA	promoter-TSS (NM_001272049)	promoter-TSS (NM_001272049)	-371	NM_001272049	10131		NM_016292	ENSG00000126602	TRAP1	HSP 75|HSP75|HSP90L|TRAP-1	TNF receptor associated protein 1	protein-coding
25232	chr3	50294265	50294358	+	31	NA	intron (NM_001200031, intron 2 of 3)	AluJr|SINE|Alu	-1882	NM_006764	7866		NM_006764	ENSG00000214706	IFRD2	IFNRP|SKMc15|SM15	interferon related developmental regulator 2	protein-coding
24943	chr7	24978978	24978998	+	31	NA	intron (NM_015550, intron 1 of 22)	intron (NM_015550, intron 1 of 22)	1190	NM_015550	26031		NM_015550	ENSG00000070882	OSBPL3	ORP-3|ORP3|OSBP3	oxysterol binding protein like 3	protein-coding
27394	chr16	67855496	67855637	+	31	NA	intron (NM_001322041, intron 1 of 4)	intron (NM_001322041, intron 1 of 4)	-7873	NM_025082	80152		NM_025082	ENSG00000102901	CENPT	C16orf56|CENP-T|SSMGA	centromere protein T	protein-coding
18100	chr20	9602721	9602821	+	31	NA	intron (NM_177990, intron 3 of 9)	intron (NM_177990, intron 3 of 9)	-87773	NR_109957	101929329		NR_109957	ENSG00000225988	LAMP5-AS1	-	LAMP5 antisense RNA 1	ncRNA
13114	chr16	3716530	3717326	+	31	NA	intron (NM_016292, intron 1 of 17)	L2a|LINE|L2	596	NM_016292	10131		NM_016292	ENSG00000126602	TRAP1	HSP 75|HSP75|HSP90L|TRAP-1	TNF receptor associated protein 1	protein-coding
15859	chr1	91014584	91015048	+	31	NA	intron (NM_032186, intron 1 of 3)	intron (NM_032186, intron 1 of 3)	6692	NM_016620	84146		NM_016620	ENSG00000122482	ZNF644	BM-005|MYP21|NatF|ZEP-2	zinc finger protein 644	protein-coding
41558	chr22	39172835	39172901	+	31	NA	Intergenic	AluSq|SINE|Alu	-20188	NM_175709	23492		NM_175709	ENSG00000100307	CBX7	-	chromobox 7	protein-coding
13532	chr19	11347413	11348170	+	30	NA	intron (NM_001080503, intron 1 of 10)	intron (NM_001080503, intron 1 of 10)	1272	NM_001080503	126075		NM_001080503	ENSG00000183401	CCDC159	-	coiled-coil domain containing 159	protein-coding
9489	chr22	38756966	38756985	+	30	NA	promoter-TSS (NM_015374)	promoter-TSS (NM_015374)	-977	NM_001199579	25777		NM_015374	ENSG00000100242	SUN2	UNC84B|rab5IP	Sad1 and UNC84 domain containing 2	protein-coding
20035	chr2	9267551	9268433	+	30	NA	intron (NM_001135191, intron 1 of 26)	L1ME3B|LINE|L1	61180	NM_003887	8853		NM_003887	ENSG00000151693	ASAP2	AMAP2|CENTB3|DDEF2|PAG3|PAP|Pap-alpha|SHAG1	ArfGAP with SH3 domain, ankyrin repeat and PH domain 2	protein-coding
34532	chr1	234747651	234748077	+	30	NA	Intergenic	Intergenic	12192	NR_148962	100130249		NR_148962	ENSG00000279261	LINC02961	PP2672	long intergenic non-protein coding RNA 2961	ncRNA
13827	chr1	109277047	109277063	+	30	NA	Intergenic	AluJb|SINE|Alu	6089	NM_001350237	84722		NM_032636	ENSG00000134222	PSRC1	DDA3|FP3214	proline and serine rich coiled-coil 1	protein-coding
27457	chr17	39696927	39697220	+	30	NA	intron (NM_001382782, intron 4 of 29)	intron (NM_001382782, intron 4 of 29)	-2991	NM_001289937	2064		NM_004448	ENSG00000141736	ERBB2	CD340|HER-2|HER-2/neu|HER2|MLN 19|MLN-19|NEU|NGL|TKR1|VSCN2|c-ERB-2|c-ERB2|p185(erbB2)	erb-b2 receptor tyrosine kinase 2	protein-coding
20625	chr11	64877416	64877754	+	30	NA	TTS (NR_162101)	TTS (NR_162101)	1024	NR_162101	113218486		NR_162101		MIR10392	-	microRNA 10392	ncRNA
17835	chr19	37287652	37288338	+	30	NA	Intergenic	Intergenic	-18985	NR_029390	284412		NR_029390		LOC284412	-	Putative uncharacterized protein PP6455	ncRNA
41348	chr6	39202933	39203672	+	30	NA	intron (NM_003740, intron 1 of 4)	intron (NM_003740, intron 1 of 4)	26173	NM_003740	8645		NM_003740	ENSG00000164626	KCNK5	K2p5.1|KCNK5b|TASK-2|TASK2	potassium two pore domain channel subfamily K member 5	protein-coding
32621	chr17	17754055	17754567	+	30	NA	intron (NM_030665, intron 2 of 5)	AluSp|SINE|Alu	11991	NR_130894	100861516		NR_130894	ENSG00000237328	RAI1-AS1	-	RAI1 antisense RNA 1	ncRNA
22942	chr4	18020449	18020988	+	30	NA	non-coding (NR_158565, exon 1 of 7)	non-coding (NR_158565, exon 1 of 7)	1037	NR_136669	254251		NM_153686	ENSG00000178177	LCORL	MLR1	ligand dependent nuclear receptor corepressor like	protein-coding
31149	chr6	33630312	33630685	+	30	NA	TTS (NR_134628)	TTS (NR_134628)	3247	NR_134628	101929188		NR_134628		ITPR3-AS1	-	ITPR3 antisense RNA 1	ncRNA
17835-2	chr19	37289507	37290424	+	30	NA	Intergenic	SST1|Satellite|centr	-20955	NR_029390	284412		NR_029390		LOC284412	-	Putative uncharacterized protein PP6455	ncRNA
15369	chr7	1159488	1159565	+	30	NA	promoter-TSS (NR_110069)	promoter-TSS (NR_110069)	670	NM_001365383	90637		NM_182491	ENSG00000178381	ZFAND2A	AIRAP	zinc finger AN1-type containing 2A	protein-coding
28786	chr9	93097444	93097901	+	30	NA	intron (NR_160511, intron 1 of 4)	intron (NR_160511, intron 1 of 4)	1455	NR_160511	84270		NM_032310	ENSG00000165233	CARD19	BinCARD|C9orf89	caspase recruitment domain family member 19	protein-coding
8824	chr4	155426359	155427360	+	30	NA	Intergenic	Intergenic	-49894	NM_001039580	79884		NM_024826	ENSG00000164114	MAP9	ASAP	microtubule associated protein 9	protein-coding
26532	chr8	138262137	138262895	+	30	NA	intron (NM_001362965, intron 4 of 19)	LTR33|LTR|ERVL	-178971	NR_161374	401478		NM_001354876		LOC401478	-	uncharacterized LOC401478	ncRNA
39668	chr20	45339679	45339713	+	30	NA	intron (NM_002999, intron 1 of 4)	AluJb|SINE|Alu	8728	NM_002999	6385		NM_002999	ENSG00000124145	SDC4	SYND4	syndecan 4	protein-coding
38968	chr6	110877788	110878129	+	30	NA	intron (NM_001287216, intron 1 of 4)	intron (NM_001287216, intron 1 of 4)	3174	NM_001287216	262		NM_001634	ENSG00000123505	AMD1	ADOMETDC|AMD|SAMDC	adenosylmethionine decarboxylase 1	protein-coding
42439	chr14	100145991	100146712	+	30	NA	3' UTR (NM_206918, exon 3 of 3)	3' UTR (NM_206918, exon 3 of 3)	13294	NM_206918	123099		NM_206918	ENSG00000168350	DEGS2	C14orf66|DES2|FADS8	delta 4-desaturase, sphingolipid 2	protein-coding
16227	chr4	41611205	41611261	+	30	NA	intron (NM_001289124, intron 6 of 25)	Tigger3a|DNA|TcMar-Tigger	-1476	NM_001330982	22998		NM_014988	ENSG00000064042	LIMCH1	LIMCH1A|LMO7B	LIM and calponin homology domains 1	protein-coding
29986	chr6	108561381	108561691	+	30	NA	exon (NM_001455, exon 1 of 3)	exon (NM_001455, exon 1 of 3)	619	NM_001455	2309		NM_001455	ENSG00000118689	FOXO3	AF6q21|FKHRL1|FKHRL1P2|FOXO2|FOXO3A	forkhead box O3	protein-coding
19785	chr14	67532593	67532647	+	29	NA	promoter-TSS (NM_020715)	promoter-TSS (NM_020715)	-670	NM_020715	57475		NM_020715	ENSG00000054690	PLEKHH1	-	pleckstrin homology, MyTH4 and FERM domain containing H1	protein-coding
7883	chr1	151953324	151954046	+	29	NA	Intergenic	LTR66|LTR|ERVL	40174	NM_002966	6281		NM_002966	ENSG00000197747	S100A10	42C|ANX2L|ANX2LG|CAL1L|CLP11|Ca[1]|GP11|P11|p10	S100 calcium binding protein A10	protein-coding
25794	chr19	1944169	1944657	+	29	NA	intron (NM_001319, intron 1 of 11)	MIRc|SINE|MIR	3241	NM_001319	1455		NM_001319	ENSG00000133275	CSNK1G2	CK1g2	casein kinase 1 gamma 2	protein-coding
132800	chr22_KI270733v1_random	137228	137614	+	29	NA	Intergenic	Intergenic	7217	NR_145822	106632264		NR_145822		RNA28SN1	RNA28S4	RNA, 28S ribosomal N1	rRNA
27690	chr3	188155176	188156236	+	29	NA	intron (NM_001375462, intron 1 of 11)	intron (NM_001375462, intron 1 of 11)	1549	NM_001375462	4026		NM_005578	ENSG00000145012	LPP	-	LIM domain containing preferred translocation partner in lipoma	protein-coding
15465	chr5	139699442	139700251	+	29	NA	Intergenic	Intergenic	24403	NM_001317209	51523		NM_016463	ENSG00000171604	CXXC5	CF5|HSPC195|RINF|WID	CXXC finger protein 5	protein-coding
52919	chr9	134330703	134331474	+	29	NA	intron (NM_002957, intron 1 of 9)	intron (NM_002957, intron 1 of 9)	4633	NM_002957	6256		NM_002957	ENSG00000186350	RXRA	NR2B1|RXR-alpha|RXRalpha	retinoid X receptor alpha	protein-coding
19767	chr11	69418322	69418335	+	29	NA	Intergenic	AluSx|SINE|Alu	-7327	NM_001319657	102724265		NM_001319657	ENSG00000255980	LINC02953	-	long intergenic non-protein coding RNA 2953	ncRNA
19015	chr6	37138709	37138923	+	29	NA	Intergenic	Intergenic	-31336	NM_002648	5292		NM_002648	ENSG00000137193	PIM1	PIM	Pim-1 proto-oncogene, serine/threonine kinase	protein-coding
23294	chr2	218296732	218297221	+	29	NA	intron (NM_015488, intron 2 of 9)	intron (NM_015488, intron 2 of 9)	-4399	NM_001321433	64114		NM_022152	ENSG00000135926	TMBIM1	LFG3|MST100|MSTP100|PP1201|RECS1	transmembrane BAX inhibitor motif containing 1	protein-coding
11156	chr10	11715055	11715299	+	29	NA	Intergenic	Intergenic	-27205	NM_024693	79746		NM_024693	ENSG00000134463	ECHDC3	-	enoyl-CoA hydratase domain containing 3	protein-coding
9069	chr11	61129654	61130424	+	29	NA	TTS (NM_017966)	TTS (NM_017966)	27550	NM_014207	921		NM_014207	ENSG00000110448	CD5	LEU1|T1	CD5 molecule	protein-coding
22972	chr9	120713378	120714170	+	29	NA	exon (NM_001080497, exon 1 of 6)	exon (NM_001080497, exon 1 of 6)	696	NM_001080497	1955		NM_001080497	ENSG00000106780	MEGF9	EGFL5	multiple EGF like domains 9	protein-coding
22655	chr17	57664635	57664683	+	29	NA	intron (NM_138962, intron 11 of 13)	intron (NM_138962, intron 11 of 13)	-56247	NR_110807	101927539		NR_110807	ENSG00000263499	LOC101927539	-	uncharacterized LOC101927539	ncRNA
17235	chr16	71882574	71883691	+	29	NA	intron (NM_001318238, intron 2 of 7)	intron (NM_001318238, intron 2 of 7)	409	NM_017530	55565		NM_017530	ENSG00000102984	ZNF821	-	zinc finger protein 821	protein-coding
13233	chr12	57429991	57430543	+	29	NA	intron (NM_001351207, intron 1 of 26)	intron (NM_001351207, intron 1 of 26)	776	NM_001330123	22864		NM_014925	ENSG00000179912	R3HDM2	CAG6|PR01365	R3H domain containing 2	protein-coding
6696	chr17	81394539	81394606	+	29	NA	promoter-TSS (NM_001291324)	promoter-TSS (NM_001291324)	-885	NM_001377448	57597		NM_024696	ENSG00000266074	BAHCC1	BAHD2	BAH domain and coiled-coil containing 1	protein-coding
12879	chr8	11846516	11846755	+	29	NA	intron (NM_001384728, intron 9 of 10)	intron (NM_001384728, intron 9 of 10)	21452	NM_001384728	1508		NM_001908	ENSG00000164733	CTSB	APPS|CPSB|KWE|RECEUP	cathepsin B	protein-coding
28904	chr6	16762751	16763447	+	29	NA	non-coding (NR_136240, exon 3 of 3)	non-coding (NR_136240, exon 3 of 3)	-1609	NM_000332	6310		NM_000332	ENSG00000124788	ATXN1	ATX1|D6S504E|SCA1	ataxin 1	protein-coding
14683	chr13	95260073	95260139	+	29	NA	intron (NM_001301830, intron 1 of 19)	MER5A|DNA|hAT-Charlie	41345	NM_005845	10257		NM_005845	ENSG00000125257	ABCC4	MOAT-B|MOATB|MRP4	ATP binding cassette subfamily C member 4 (PEL blood group)	protein-coding
29583	chr11	67285758	67286370	+	29	NA	3' UTR (NM_001619, exon 21 of 21)	3' UTR (NM_001619, exon 21 of 21)	-3239	NM_001347901	338692		NM_207354	ENSG00000172932	ANKRD13D	-	ankyrin repeat domain 13D	protein-coding
27605	chr12	108306177	108306345	+	29	NA	intron (NM_001142344, intron 1 of 2)	LTR33|LTR|ERVL	14401	NM_001142345	1240		NM_004072	ENSG00000174600	CMKLR1	CHEMERINR|ChemR23|DEZ|ERV1|RVER1	chemerin chemokine-like receptor 1	protein-coding
52919-2	chr9	134331696	134332315	+	29	NA	intron (NM_002957, intron 1 of 9)	intron (NM_002957, intron 1 of 9)	5550	NM_002957	6256		NM_002957	ENSG00000186350	RXRA	NR2B1|RXR-alpha|RXRalpha	retinoid X receptor alpha	protein-coding
34897	chr19	40803176	40803449	+	28	NA	intron (NM_053046, intron 2 of 5)	intron (NM_053046, intron 2 of 5)	3790	NM_053046	112398		NM_017555	ENSG00000269858	EGLN2	EIT-6|EIT6|HIF-PH1|HIFPH1|HPH-1|HPH-3|PHD1	egl-9 family hypoxia inducible factor 2	protein-coding
9661	chr6	17987812	17988918	+	28	NA	promoter-TSS (NM_001105566)	promoter-TSS (NM_001105566)	-730	NM_001105566	63971		NM_022113	ENSG00000137177	KIF13A	RBKIN|bA500C11.2	kinesin family member 13A	protein-coding
22013	chr5	95861112	95861828	+	28	NA	Intergenic	Intergenic	9238	NR_026936	202299		NM_175616	ENSG00000236882	LINC01554	C5orf27|FIS	long intergenic non-protein coding RNA 1554	ncRNA
13180	chr5	152643925	152645159	+	28	NA	intron (NR_109877, intron 4 of 4)	intron (NR_109877, intron 4 of 4)	-239263	NM_020167	56923		NM_020167	ENSG00000132911	NMUR2	FM-4|FM4|NMU-R2|NMU2R|TGR-1|TGR1	neuromedin U receptor 2	protein-coding
10392	chr6	77368633	77369268	+	28	NA	Intergenic	LTR1A2|LTR|ERV1	94541	NM_000863	3351		NM_000863	ENSG00000135312	HTR1B	5-HT-1B|5-HT-1D-beta|5-HT1B|5-HT1DB|HTR1D2|HTR1DB|S12	5-hydroxytryptamine receptor 1B	protein-coding
15654	chr3	47900666	47901647	+	28	NA	intron (NM_001384835, intron 5 of 12)	intron (NM_001384835, intron 5 of 12)	51601	NR_031595	100302232		NR_031595	ENSG00000221585	MIR1226	MIRN1226|hsa-mir-1226|mir-1226	microRNA 1226	ncRNA
21519-3	chr19	38376470	38377025	+	28	NA	intron (NM_002812, intron 3 of 6)	L2b|LINE|L2	2176	NM_002812	5714		NM_002812	ENSG00000099341	PSMD8	HEL-S-91n|HIP6|HYPF|Nin1p|Rpn12|S14|p31	proteasome 26S subunit, non-ATPase 8	protein-coding
18067-2	chr20	1470997	1471351	+	28	NA	Intergenic	L1ME3Cz|LINE|L1	-3482	NR_038164	55968		NM_016143	ENSG00000088833	NSFL1C	P47|UBX1|UBXD10|UBXN2C|dJ776F14.1	NSFL1 cofactor	protein-coding
21057	chr13	97976941	97977785	+	28	NA	intron (NM_002271, intron 4 of 28)	intron (NM_002271, intron 4 of 28)	23688	NM_002271	3843		NM_002271	ENSG00000065150	IPO5	IMB3|KPNB3|Pse1|RANBP5|imp5	importin 5	protein-coding
17006	chr6	47632974	47634506	+	28	NA	Intergenic	MLT1D|LTR|ERVL-MaLR	-22732	NM_001368115	222611		NM_153839		ADGRF2	GPR111|PGR20|hGPCR35	adhesion G protein-coupled receptor F2	ncRNA
14527	chr6	155883695	155883896	+	28	NA	Intergenic	Intergenic	-63002	NR_031606	100302259		NR_031606	ENSG00000221456	MIR1202	MIRN1202|hsa-mir-1202	microRNA 1202	ncRNA
13063	chrY	13704826	13704886	+	28	NA	intron (NM_004202, intron 1 of 1)	AluSx1|SINE|Alu	957	NM_004202	9087		NM_004202	ENSG00000154620	TMSB4Y	TB4Y	thymosin beta 4 Y-linked	protein-coding
11194	chr16	69820625	69820651	+	28	NA	intron (NM_001270455, intron 4 of 8)	L2a|LINE|L2	-18099	NM_001270453	11060		NM_007014	ENSG00000198373	WWP2	AIP2|WWp2-like	WW domain containing E3 ubiquitin protein ligase 2	protein-coding
18492	chr3	50349026	50349412	+	28	NA	intron (NM_006545, intron 4 of 10)	MIR3|SINE|MIR	1556	NM_006545	10641		NM_006545	ENSG00000114388	NPRL2	FFEVF2|NPR2|NPR2L|TUSC4	NPR2 like, GATOR1 complex subunit	protein-coding
33016	chr20	63518945	63519354	+	28	NA	Intergenic	Intergenic	-1592	NR_148427	79144		NM_024299	ENSG00000125534	PPDPF	C20orf149|dJ697K14.9|exdpf	pancreatic progenitor cell differentiation and proliferation factor	protein-coding
6740	chr2	62526577	62527399	+	28	NA	Intergenic	AluJo|SINE|Alu	-20793	NM_198276	200728		NM_198276	ENSG00000186889	TMEM17	-	transmembrane protein 17	protein-coding
18067	chr20	1469068	1470666	+	28	NA	Intergenic	Intergenic	-2175	NR_038164	55968		NM_016143	ENSG00000088833	NSFL1C	P47|UBX1|UBXD10|UBXN2C|dJ776F14.1	NSFL1 cofactor	protein-coding
26780	chr16	66328128	66328858	+	28	NA	Intergenic	Intergenic	-38198	NM_001795	1003		NM_001795	ENSG00000179776	CDH5	7B4|CD144	cadherin 5	protein-coding
15333	chr9	129037422	129037911	+	28	NA	intron (NM_032809, intron 1 of 15)	intron (NM_032809, intron 1 of 15)	732	NM_032809	84895		NM_032809	ENSG00000148343	MIGA2	C9orf54|FAM73B	mitoguardin 2	protein-coding
14834	chr9	115372715	115373918	+	28	NA	intron (NR_163556, intron 4 of 7)	FLAM_C|SINE|Alu	231498	NR_163556	50514		NM_017418	ENSG00000173077	DELEC1	CTS9|DEC1	deleted in esophageal cancer 1	ncRNA
18405	chr17	42153633	42153874	+	28	NA	intron (NM_201434, intron 1 of 6)	intron (NM_201434, intron 1 of 6)	1236	NM_201434	5878		NM_004583	ENSG00000108774	RAB5C	L1880|RAB5CL|RAB5L|RABL	RAB5C, member RAS oncogene family	protein-coding
11720	chr7	85764652	85765494	+	28	NA	Intergenic	HERVK22-int|LTR|ERVK	343951	NR_134240	105375380		NR_134240	ENSG00000225128	LINC00972	-	long intergenic non-protein coding RNA 972	ncRNA
47004	chr8	143948934	143950874	+	28	NA	intron (NM_000445, intron 2 of 32)	intron (NM_000445, intron 2 of 32)	1022	NM_201380	5339		NM_000445	ENSG00000178209	PLEC	EBS1|EBS5A|EBS5B|EBS5C|EBS5D|EBSMD|EBSND|EBSO|EBSOG|EBSPA|HD1|LGMD2Q|LGMDR17|PCN|PLEC1|PLEC1b|PLTN	plectin	protein-coding
23218	chr6	149750778	149750781	+	27	NA	intron (NM_001252051, intron 1 of 6)	intron (NM_001252051, intron 1 of 6)	1038	NM_001360452	5110		NM_005389	ENSG00000120265	PCMT1	PIMT	protein-L-isoaspartate (D-aspartate) O-methyltransferase	protein-coding
29050	chr19	3987723	3988239	+	27	NA	Intergenic	Intergenic	-2518	NM_001961	1938		NM_001961	ENSG00000167658	EEF2	EEF-2|EF-2|EF2|SCA26	eukaryotic translation elongation factor 2	protein-coding
15586	chr5	78984144	78986197	+	27	NA	exon (NM_198709, exon 2 of 8)	exon (NM_198709, exon 2 of 8)	140	NM_000046	411		NM_000046	ENSG00000113273	ARSB	ASB|G4S|MPS6	arylsulfatase B	protein-coding
7037	chr7	55073739	55074493	+	27	NA	intron (NM_001346941, intron 1 of 21)	intron (NM_001346941, intron 1 of 21)	-35723	NM_001346900	1956		NM_005228	ENSG00000146648	EGFR	ERBB|ERBB1|ERRP|HER1|NISBD2|PIG61|mENA	epidermal growth factor receptor	protein-coding
20793	chr17	43023171	43023447	+	27	NA	promoter-TSS (NM_006373)	promoter-TSS (NM_006373)	-924	NM_006373	10493		NM_006373	ENSG00000108828	VAT1	VATI	vesicle amine transport 1	protein-coding
23059	chr5	177367955	177369254	+	27	NA	intron (NM_006480, intron 8 of 14)	intron (NM_006480, intron 8 of 14)	10680	NM_001366617	10636		NM_006480	ENSG00000169220	RGS14	-	regulator of G protein signaling 14	protein-coding
9602	chr12	120725307	120726455	+	27	NA	promoter-TSS (NM_000017)	promoter-TSS (NM_000017)	55	NM_001302554	35		NM_000017	ENSG00000122971	ACADS	ACAD3|SCAD	acyl-CoA dehydrogenase short chain	protein-coding
39903	chr6	41445602	41446675	+	27	NA	Intergenic	Intergenic	-56306	NR_120347	103106903		NR_120347	ENSG00000226917	LINC01276	-	long intergenic non-protein coding RNA 1276	ncRNA
20354	chr1	2196294	2196777	+	27	NA	intron (NM_001282670, intron 5 of 7)	AluJo|SINE|Alu	-1760	NM_001282671	199990		NM_182533	ENSG00000162585	FAAP20	C1orf86|FP7162	FA core complex associated protein 20	protein-coding
12399	chr3	99920384	99921709	+	27	NA	intron (NM_182909, intron 4 of 5)	intron (NM_182909, intron 4 of 5)	43352	NR_037486	100500859		NR_037486	ENSG00000264897	MIR3921	-	microRNA 3921	ncRNA
3874-5	chr5	134927537	134928294	+	27	NA	intron (NM_032151, intron 2 of 3)	intron (NM_032151, intron 2 of 3)	22784	NM_032151	84105		NM_032151	ENSG00000132570	PCBD2	DCOH2|DCOHM|PHS2	pterin-4 alpha-carbinolamine dehydratase 2	protein-coding
14608	chr17	59356716	59357065	+	27	NA	intron (NM_001005404, intron 2 of 4)	MLT1A0|LTR|ERVL-MaLR	-9193	NR_039882	100616204		NR_039882	ENSG00000263857	MIR4729	-	microRNA 4729	ncRNA
19716	chr2	7849523	7849992	+	27	NA	Intergenic	Intergenic	49898	NR_110256	101929551		NR_110256	ENSG00000226506	LOC101929551	-	uncharacterized LOC101929551	ncRNA
20101	chr6	134832329	134833015	+	27	NA	Intergenic	Intergenic	117429	NM_001193480	64577		NM_022568	ENSG00000118514	ALDH8A1	ALDH12|DJ352A20.2	aldehyde dehydrogenase 8 family member A1	protein-coding
31773	chr4	183407749	183407860	+	27	NA	Intergenic	L1MC4|LINE|L1	-36832	NM_017632	55602		NM_017632	ENSG00000168564	CDKN2AIP	CARF	CDKN2A interacting protein	protein-coding
15660	chr13	21297116	21297583	+	27	NA	promoter-TSS (NR_038939)	promoter-TSS (NR_038939)	742	NM_001365454
17961	chr16	4765680	4766398	+	27	NA	5' UTR (NM_001303450, exon 2 of 7)	5' UTR (NM_001303450, exon 2 of 7)	1123	NM_021646	26048		NM_021646	ENSG00000103199	ZNF500	ZKSCAN18|ZSCAN50	zinc finger protein 500	protein-coding
47858	chr14	95665374	95665876	+	27	NA	intron (NR_152604, intron 4 of 7)	LTR32|LTR|ERVL	13528	NR_152604	27004		NM_012468		TCL6	TNG1|TNG2	T cell leukemia/lymphoma 6	ncRNA
30746	chr6	44258243	44259192	+	27	NA	promoter-TSS (NM_001286511)	promoter-TSS (NM_001286511)	-827	NM_001286511	347734		NM_178148	ENSG00000157593	SLC35B2	HLD26|PAPST1|SLL|UGTrel4	solute carrier family 35 member B2	protein-coding
14076	chr10	36442216	36442764	+	27	NA	Intergenic	Intergenic	664188	NR_110138	102578074		NR_110138	ENSG00000280719	PCAT5	LINC01452|TPCAT-10-36067	prostate cancer associated transcript 5	ncRNA
28001	chr14	100287492	100288130	+	27	NA	Intergenic	Intergenic	10454	NR_106822	102466730		NR_106822	ENSG00000283840	MIR6764	hsa-mir-6764	microRNA 6764	ncRNA
36459	chr15	66762785	66764264	+	27	NA	intron (NR_027654, intron 4 of 4)	intron (NR_027654, intron 4 of 4)	61288	NM_005585	4091		NM_005585	ENSG00000137834	SMAD6	AOVD2|HsT17432|MADH6|MADH7	SMAD family member 6	protein-coding
28159	chr12	124545242	124546287	+	27	NA	intron (NM_001077261, intron 1 of 47)	intron (NM_001077261, intron 1 of 47)	21848	NM_001206654	9612		NM_006312	ENSG00000196498	NCOR2	CTG26|N-CoR2|SMAP270|SMRT|SMRTE|SMRTE-tau|TNRC14|TRAC|TRAC-1|TRAC1	nuclear receptor corepressor 2	protein-coding
21028	chr19	43531850	43532393	+	26	NA	Intergenic	AluSx|SINE|Alu	-1067	NM_174945	284346		NM_174945	ENSG00000176472	ZNF575	-	zinc finger protein 575	protein-coding
13297	chr17	78783692	78784300	+	26	NA	Intergenic	Intergenic	-1654	NM_004762	9267		NM_004762	ENSG00000108669	CYTH1	B2-1|CYTOHESIN-1|D17S811E|PSCD1|SEC7	cytohesin 1	protein-coding
33410	chr12	6376354	6377076	+	26	NA	intron (NM_001270987, intron 1 of 9)	intron (NM_001270987, intron 1 of 9)	642	NM_001159575	6337		NM_001038	ENSG00000111319	SCNN1A	BESC2|ENaCa|ENaCalpha|LIDLS3|PHA1B1|SCNEA|SCNN1	sodium channel epithelial 1 subunit alpha	protein-coding
24268	chr11	75344717	75345079	+	26	NA	intron (NM_020251, intron 1 of 14)	intron (NM_020251, intron 1 of 14)	6763	NM_004041	408		NM_004041	ENSG00000137486	ARRB1	ARB1|ARR1	arrestin beta 1	protein-coding
24639	chr15	88637858	88637948	+	26	NA	intron (NM_001303234, intron 2 of 4)	intron (NM_001303234, intron 2 of 4)	-1113	NM_002201	3669		NM_002201	ENSG00000172183	ISG20	CD25|HEM45	interferon stimulated exonuclease gene 20	protein-coding
17482	chr16	57478347	57478678	+	26	NA	intron (NM_001330556, intron 1 of 6)	intron (NM_001330556, intron 1 of 6)	1245	NM_001330556	55715		NM_018110	ENSG00000125170	DOK4	IRS-5|IRS5	docking protein 4	protein-coding
19780	chr19	8241801	8242531	+	26	NA	intron (NM_024552, intron 2 of 11)	MIRb|SINE|MIR	32796	NM_024552	79603		NM_024552	ENSG00000090661	CERS4	LASS4|Trh1	ceramide synthase 4	protein-coding
41643	chr4	703972	704757	+	26	NA	Intergenic	Intergenic	-1468	NM_006315	10336		NM_006315	ENSG00000185619	PCGF3	DONG1|RNF3|RNF3A	polycomb group ring finger 3	protein-coding
13253-2	chr14	22613888	22614795	+	26	NA	Intergenic	Intergenic	16103	NM_022060	63874		NM_022060	ENSG00000100439	ABHD4	ABH4	abhydrolase domain containing 4, N-acyl phospholipase B	protein-coding
23568	chr10	103798758	103799077	+	26	NA	intron (NM_014631, intron 2 of 13)	intron (NM_014631, intron 2 of 13)	52138	NR_038940	100505839		NR_038940	ENSG00000280693	SH3PXD2A-AS1	-	SH3PXD2A antisense RNA 1	ncRNA
19866	chr21	45305728	45306009	+	26	NA	Intergenic	Intergenic	17816	NR_026943	642852		NR_026943	ENSG00000223768	LINC00205	LVBU|NCRNA00205	long intergenic non-protein coding RNA 205	ncRNA
20892	chr1	43600633	43600670	+	26	NA	intron (NM_001329140, intron 12 of 30)	intron (NM_001329140, intron 12 of 30)	-49498	NM_014663	9682		NM_014663	ENSG00000066135	KDM4A	JHDM3A|JMJD2|JMJD2A|TDRD14A	lysine demethylase 4A	protein-coding
13603	chr16	48385359	48385378	+	26	NA	promoter-TSS (NM_003031)	promoter-TSS (NM_003031)	45	NM_003031	6477		NM_003031	ENSG00000196470	SIAH1	BURHAS|SIAH1A	siah E3 ubiquitin protein ligase 1	protein-coding
20316	chr19	55475201	55475438	+	26	NA	Intergenic	L2b|LINE|L2	-1298	NM_033113	89887		NM_033113	ENSG00000197483	ZNF628	ZEC|Zfp628	zinc finger protein 628	protein-coding
9476-2	chr7	151340794	151342063	+	26	NA	promoter-TSS (NM_001363529)	promoter-TSS (NM_001363529)	-384	NM_001385355	51667		NM_016118	ENSG00000013374	NUB1	BS4|NUB1L|NYREN18	negative regulator of ubiquitin like proteins 1	protein-coding
21936	chr12	132495713	132496440	+	26	NA	intron (NM_001382740, intron 1 of 11)	intron (NM_001382740, intron 1 of 11)	5925	NM_001382743	57666		NM_001142641	ENSG00000112787	FBRSL1	-	fibrosin like 1	protein-coding
23077	chr20	19885748	19887935	+	26	NA	intron (NM_001242581, intron 1 of 11)	intron (NM_001242581, intron 1 of 11)	320	NM_001242581	54453		NM_018993	ENSG00000132669	RIN2	MACS|RASSF4	Ras and Rab interactor 2	protein-coding
11240	chr16	48609020	48609957	+	26	NA	intron (NM_153029, intron 1 of 6)	MIR|SINE|MIR	692	NM_153029	9683		NM_014664	ENSG00000102921	N4BP1	-	NEDD4 binding protein 1	protein-coding
11287	chr2	152408063	152408503	+	26	NA	intron (NM_052905, intron 1 of 25)	intron (NM_052905, intron 1 of 25)	73109	NM_052905	114793		NM_052905	ENSG00000157827	FMNL2	FHOD2	formin like 2	protein-coding
47580	chrUn_GL000224v1	15122	15894	+	26	NA	Intergenic	Intergenic	-86995	NR_135481	100505874		NR_135481		LOC100505874	-	uncharacterized LOC100505874	ncRNA
13852	chr19	35000637	35000639	+	26	NA	intron (NM_001320034, intron 1 of 18)	CpG	315	NM_020895	57655		NM_020895	ENSG00000089351	GRAMD1A	KIAA1533	GRAM domain containing 1A	protein-coding
24950	chr17	7235964	7236094	+	26	NA	exon (NM_001284517, exon 4 of 5)	exon (NM_001284517, exon 4 of 5)	-1512	NM_004422	1856		NM_004422	ENSG00000004975	DVL2	-	dishevelled segment polarity protein 2	protein-coding
13253	chr14	22613287	22613556	+	26	NA	Intergenic	Intergenic	15183	NM_022060	63874		NM_022060	ENSG00000100439	ABHD4	ABH4	abhydrolase domain containing 4, N-acyl phospholipase B	protein-coding
5404-2	chr6	11537090	11537728	+	26	NA	promoter-TSS (NM_001100829)	promoter-TSS (NM_001100829)	-340	NM_001100829	100113407		NM_001100829	ENSG00000205269	TMEM170B	-	transmembrane protein 170B	protein-coding
13907	chr1	169892026	169892131	+	26	NA	intron (NM_181093, intron 1 of 13)	intron (NM_181093, intron 1 of 13)	1818	NM_020423	57147		NM_020423	ENSG00000000457	SCYL3	PACE-1|PACE1	SCY1 like pseudokinase 3	protein-coding
26684	chr12	12562183	12564232	+	26	NA	promoter-TSS (NM_030640)	promoter-TSS (NM_030640)	-344	NM_030640	80824		NM_030640	ENSG00000111266	DUSP16	MKP-7|MKP7	dual specificity phosphatase 16	protein-coding
18266	chr22	46775504	46775728	+	26	NA	intron (NM_001284305, intron 1 of 12)	intron (NM_001284305, intron 1 of 12)	1689	NM_001284305	25771		NM_014346	ENSG00000054611	TBC1D22A	C22orf4|HSC79E021	TBC1 domain family member 22A	protein-coding
23507	chr10	651801	653074	+	26	NA	3' UTR (NM_001355390, exon 3 of 3)	3' UTR (NM_001355390, exon 3 of 3)	2402	NM_001355388	414235		NM_001012714	ENSG00000180525	DIP2C-AS1	C10orf108|PRR26	DIP2C antisense RNA 1	ncRNA
14428	chr19	44165716	44165955	+	26	NA	intron (NM_001032372, intron 2 of 5)	intron (NM_001032372, intron 2 of 5)	671	NM_001032372	7769		NM_015919	ENSG00000167380	ZNF226	-	zinc finger protein 226	protein-coding
31901	chr4	38244228	38244600	+	26	NA	Intergenic	AluSg|SINE|Alu	-122500	NR_149123	105374410		NR_149123	ENSG00000248227	LINC02513	-	long intergenic non-protein coding RNA 2513	ncRNA
22020	chr7	20342842	20343258	+	26	NA	intron (NM_002214, intron 1 of 13)	intron (NM_002214, intron 1 of 13)	-11288	NR_110119	101927811		NR_110119	ENSG00000271133	ITGB8-AS1	-	ITGB8 antisense RNA 1	ncRNA
23892	chr17	76545513	76546290	+	26	NA	TTS (NR_033357)	TTS (NR_033357)	5857	NM_001077620	768206		NM_001077620	ENSG00000214140	PRCD	RP36	photoreceptor disc component	protein-coding
15219	chr11	134032677	134032890	+	26	NA	non-coding (NR_027276, exon 1 of 3)	non-coding (NR_027276, exon 1 of 3)	511	NR_027276	100128239		NR_027276	ENSG00000204241	LINC02731	-	long intergenic non-protein coding RNA 2731	ncRNA
15416	chr11	114208741	114210475	+	26	NA	intron (NM_001354751, intron 4 of 6)	intron (NM_001354751, intron 4 of 6)	-48198	NM_001372047	4837		NM_006169	ENSG00000166741	NNMT	-	nicotinamide N-methyltransferase	protein-coding
21069	chr11	76790310	76790470	+	25	NA	intron (NM_001318478, intron 1 of 1)	MIRb|SINE|MIR	-1362	NM_001318477	25987		NM_015516	ENSG00000182704	TSKU	E2IG4|LRRC54|TSK	tsukushi, small leucine rich proteoglycan	protein-coding
17210	chr16	647149	647606	+	25	NA	intron (NR_138610, intron 2 of 4)	intron (NR_138610, intron 2 of 4)	1936	NR_135177	105371038		NR_135177		LOC105371038	-	uncharacterized LOC105371038	ncRNA
11446	chr3	63944674	63945295	+	25	NA	intron (NM_001177387, intron 3 of 12)	AluSz|SINE|Alu	-22810	NM_001128149	6314		NM_000333	ENSG00000163635	ATXN7	ADCAII|OPCA3|SCA7|SGF73	ataxin 7	protein-coding
11311	chr18	31820896	31822351	+	25	NA	Intergenic	AluSc5|SINE|Alu	-60743	NM_001034172	147407		NM_001034172	ENSG00000141437	SLC25A52	MCART2	solute carrier family 25 member 52	protein-coding
23085	chr7	27121663	27121787	+	25	NA	promoter-TSS (NR_122069)	promoter-TSS (NR_122069)	-194	NR_122069	285943		NR_122069		HOXA-AS2	HOXA3as	HOXA cluster antisense RNA 2	ncRNA
13808	chr2	179057976	179059179	+	25	NA	Intergenic	Intergenic	-8440	NM_173648	285025		NM_173648	ENSG00000163492	CCDC141	CAMDI	coiled-coil domain containing 141	protein-coding
60237	chr1_KI270762v1_alt	202759	205301	+	25	NA	intron (NM_001242672, intron 4 of 6)	intron (NM_001242672, intron 4 of 6)	-19827	NM_033467	79258		NM_033467	ENSG00000142606	MMEL1	MMEL2|NEP2|NEPII|NL1|NL2|SEP	membrane metalloendopeptidase like 1	protein-coding
12740	chr19	46660563	46660575	+	25	NA	promoter-TSS (NR_040041)	promoter-TSS (NR_040041)	205	NR_040042	100506068		NR_040041	ENSG00000245598	DACT3-AS1	-	DACT3 antisense RNA 1	ncRNA
6039-2	chr4	142614977	142615708	+	25	NA	intron (NM_003866, intron 2 of 26)	MER4D|LTR|ERV1	-54587	NM_001385338	8821		NM_003866	ENSG00000109452	INPP4B	-	inositol polyphosphate-4-phosphatase type II B	protein-coding
27205	chr20	62927660	62927680	+	25	NA	intron (NM_022105, intron 1 of 5)	intron (NM_022105, intron 1 of 5)	-1119	NM_080796	11083		NM_022105	ENSG00000101191	DIDO1	BYE1|C20orf158|DATF-1|DATF1|DIDO2|DIDO3|DIO-1|DIO1|dJ885L7.8	death inducer-obliterator 1	protein-coding
20319	chr11	306798	307004	+	25	NA	Intergenic	Intergenic	-1206	NM_006435	10581		NM_006435	ENSG00000185201	IFITM2	1-8D|DSPA2c	interferon induced transmembrane protein 2	protein-coding
11820-2	chr20	51679284	51680057	+	25	NA	intron (NM_006045, intron 9 of 27)	intron (NM_006045, intron 9 of 27)	88720	NM_006045	10079		NM_006045	ENSG00000054793	ATP9A	ATPIIA|NEDGBA	ATPase phospholipid transporting 9A (putative)	protein-coding
22571	chr4	49146131	49146248	+	25	NA	Intergenic	(TCCAT)n|Simple_repeat|Simple_repeat	159547	NM_001286791	80157		NM_025087	ENSG00000109182	CWH43	CWH43-C|PGAP2IP	cell wall biogenesis 43 C-terminal homolog	protein-coding
32338	chr12	124497274	124498843	+	25	NA	intron (NM_001077261, intron 2 of 47)	intron (NM_001077261, intron 2 of 47)	69554	NM_001206654	9612		NM_006312	ENSG00000196498	NCOR2	CTG26|N-CoR2|SMAP270|SMRT|SMRTE|SMRTE-tau|TNRC14|TRAC|TRAC-1|TRAC1	nuclear receptor corepressor 2	protein-coding
17980	chr8	29260661	29261249	+	25	NA	intron (NM_015254, intron 1 of 39)	intron (NM_015254, intron 1 of 39)	2115	NM_015254	23303		NM_015254	ENSG00000197892	KIF13B	GAKIN	kinesin family member 13B	protein-coding
12279	chr11	448868	449039	+	25	NA	intron (NM_001329548, intron 1 of 11)	L1MB8|LINE|L1	685	NM_001329548	81490		NM_030783	ENSG00000174915	PTDSS2	PSS2	phosphatidylserine synthase 2	protein-coding
7775-2	chr3	69249113	69249207	+	25	NA	intron (NM_015123, intron 7 of 22)	intron (NM_015123, intron 7 of 22)	-126565	NM_198271	56203		NM_198271	ENSG00000163380	LMOD3	NEM10	leiomodin 3	protein-coding
4361-2	chr17	22522746	22523482	+	25	NA	promoter-TSS (NM_001190452)	promoter-TSS (NM_001190452)	3	NM_001190452	100462977		NM_001190452		MTRNR2L1	HN1	MT-RNR2 like 1 (pseudogene)	pseudo
13794	chr7	47356968	47358817	+	25	NA	intron (NM_022748, intron 17 of 30)	intron (NM_022748, intron 17 of 30)	106911	NR_145813	109623468		NR_145813		SNORD151	-	small nucleolar RNA, C/D box 151	snoRNA
8109	chr22	17370276	17370861	+	25	NA	intron (NM_001290047, intron 1 of 18)	CpG	1108	NM_001290047	27443		NM_031413	ENSG00000099954	CECR2	-	CECR2 histone acetyl-lysine reader	protein-coding
9975	chr8	41529630	41529838	+	25	NA	intron (NM_032336, intron 1 of 7)	FLAM_C|SINE|Alu	473	NM_032336	84296		NM_032336	ENSG00000147536	GINS4	SLD5	GINS complex subunit 4	protein-coding
10493	chr1	8862312	8863999	+	25	NA	intron (NM_001428, intron 10 of 11)	intron (NM_001428, intron 10 of 11)	3435	NR_106786	102465436		NR_106786	ENSG00000274258	MIR6728	hsa-mir-6728	microRNA 6728	ncRNA
15083	chr13	30832866	30834466	+	25	NA	Intergenic	AluSq|SINE|Alu	30460	NR_047012	100874158		NR_047012	ENSG00000237879	LINC00398	-	long intergenic non-protein coding RNA 398	ncRNA
15076	chr2	227764629	227764801	+	25	NA	Intergenic	AluSx|SINE|Alu	-46687	NM_025243	80704		NM_025243	ENSG00000135917	SLC19A3	BBGD|THMD2|THTR2|hTHTR2|thTr-2	solute carrier family 19 member 3	protein-coding
10811	chr16	69838296	69838890	+	25	NA	promoter-TSS (NM_001270453)	promoter-TSS (NM_001270453)	-144	NM_001270453	11060		NM_007014	ENSG00000198373	WWP2	AIP2|WWp2-like	WW domain containing E3 ubiquitin protein ligase 2	protein-coding
18753	chr10	58266171	58266673	+	25	NA	intron (NM_152230, intron 1 of 5)	MIRc|SINE|MIR	1472	NM_152230	253430		NM_152230	ENSG00000151151	IPMK	-	inositol polyphosphate multikinase	protein-coding
3272-2	chr7	65872996	65873225	+	25	NA	promoter-TSS (NM_001284342)	promoter-TSS (NM_001284342)	36	NM_001284342	154807		NM_173517	ENSG00000196715	VKORC1L1	-	vitamin K epoxide reductase complex subunit 1 like 1	protein-coding
14350	chr1	46718159	46718346	+	25	NA	5' UTR (NM_014774, exon 1 of 11)	5' UTR (NM_014774, exon 1 of 11)	862	NM_014774	9813		NM_014774	ENSG00000159658	EFCAB14	KIAA0494	EF-hand calcium binding domain 14	protein-coding
26949	chr6	139027939	139028147	+	25	NA	promoter-TSS (NM_021243)	promoter-TSS (NM_021243)	-702	NM_021243	58527		NM_021243	ENSG00000146386	ABRACL	C6orf115|Costars|HSPC280|PRO2013	ABRA C-terminal like	protein-coding
20068	chr3	184375348	184376123	+	25	NA	intron (NM_001290028, intron 3 of 5)	intron (NM_001290028, intron 3 of 5)	2472	NM_000460	7066		NM_000460	ENSG00000090534	THPO	CAMT2|MGDF|MKCSF|ML|MPLLG|THC9|THCYT1|TPO	thrombopoietin	protein-coding
24826	chr11	69435675	69436064	+	25	NA	Intergenic	Intergenic	10214	NM_001319657	102724265		NM_001319657	ENSG00000255980	LINC02953	-	long intergenic non-protein coding RNA 2953	ncRNA
14437	chr19	41428389	41428988	+	25	NA	promoter-TSS (NM_198540)	promoter-TSS (NM_198540)	42	NM_198540	374907		NM_198540	ENSG00000177191	B3GNT8	B3GALT7|BGALT15|beta3Gn-T8	UDP-GlcNAc:betaGal beta-1,3-N-acetylglucosaminyltransferase 8	protein-coding
12392	chr8	80109529	80109917	+	24	NA	intron (NM_001287144, intron 1 of 5)	MER31-int|LTR|ERV1	-28892	NM_001287142	7163		NM_005079	ENSG00000076554	TPD52	D52|N8L|PC-1|PrLZ|hD52	tumor protein D52	protein-coding
23768	chr16	57617553	57618579	+	24	NA	Intergenic	Intergenic	-1672	NM_001370440	9289		NM_005682	ENSG00000205336	ADGRG1	BFPP|BPPR|CDCBM14B|CDCBM15A|GPR56|TM7LN4|TM7XN1	adhesion G protein-coupled receptor G1	protein-coding
22353	chr3	53171936	53172943	+	24	NA	intron (NM_001354676, intron 1 of 17)	intron (NM_001354676, intron 1 of 17)	3736	NM_001354676	5580		NM_006254	ENSG00000163932	PRKCD	ALPS3|CVID9|MAY1|PKCD|nPKC-delta	protein kinase C delta	protein-coding
9959	chr3	120003786	120004859	+	24	NA	intron (NM_001146156, intron 1 of 10)	L1PA7|LINE|L1	80326	NR_162125	113839522		NR_162125		MIR6529	-	microRNA 6529	ncRNA
38788	chr8	11711177	11711820	+	24	NA	intron (NM_002052, intron 2 of 6)	AluJr4|SINE|Alu	6136	NR_132779	106635531		NR_132779		SNORA99	-	small nucleolar RNA, H/ACA box 99	snoRNA
21099	chr19	14495329	14495730	+	24	NA	intron (NM_005716, intron 1 of 8)	MIR|SINE|MIR	598	NM_005716	10755		NM_005716	ENSG00000123159	GIPC1	C19orf3|GIPC|GLUT1CBP|Hs.6454|IIP-1|NIP|OPDM2|RGS19IP1|SEMCAP|SYNECTIIN|SYNECTIN|TIP-2	GIPC PDZ domain containing family member 1	protein-coding
16768	chr12	49109049	49109715	+	24	NA	intron (NM_001352161, intron 1 of 16)	intron (NM_001352161, intron 1 of 16)	1518	NM_001352167	55716		NM_018113	ENSG00000139636	LMBR1L	LIMR	limb development membrane protein 1 like	protein-coding
22353-2	chr3	53170084	53170230	+	24	NA	intron (NM_001354676, intron 1 of 17)	intron (NM_001354676, intron 1 of 17)	1454	NM_001354676	5580		NM_006254	ENSG00000163932	PRKCD	ALPS3|CVID9|MAY1|PKCD|nPKC-delta	protein kinase C delta	protein-coding
19300	chr2	235504111	235504243	+	24	NA	intron (NM_001037131, intron 1 of 17)	L1ME3A|LINE|L1	-1574	NR_131900	100506749		NR_131900	ENSG00000235529	AGAP1-IT1	-	AGAP1 intronic transcript 1	ncRNA
17606	chr17	75350076	75350384	+	24	NA	intron (NM_203506, intron 2 of 4)	FAM|SINE|Alu	55448	NM_002086	2885		NM_002086	ENSG00000177885	GRB2	ASH|EGFRBP-GRB2|Grb3-3|MST084|MSTP084|NCKAP2	growth factor receptor bound protein 2	protein-coding
17990	chr2	120254061	120254826	+	24	NA	intron (NM_002881, intron 1 of 4)	intron (NM_002881, intron 1 of 4)	1591	NM_001369400	5899		NM_002881	ENSG00000144118	RALB	-	RAS like proto-oncogene B	protein-coding
8016	chr10	32377509	32379050	+	24	NA	intron (NR_168507, intron 1 of 1)	intron (NR_168507, intron 1 of 1)	490	NR_168507	80314		NM_025209	ENSG00000120616	EPC1	Epl1	enhancer of polycomb homolog 1	protein-coding
12581-2	chr19	58498139	58498583	+	24	NA	TTS (NM_012254)	TTS (NM_012254)	13631	NM_012254	10998		NM_012254	ENSG00000083807	SLC27A5	ACSB|ACSVL6|BACS|BAL|FACVL3|FATP-5|FATP5|VLACSR|VLCS-H2|VLCSH2	solute carrier family 27 member 5	protein-coding
28604	chr17	75824705	75826257	+	24	NA	3' UTR (NM_001080419, exon 16 of 16)	3' UTR (NM_001080419, exon 16 of 16)	18923	NM_199242	201294		NM_199242	ENSG00000092929	UNC13D	FHL3|HLH3|HPLH3|Munc13-4	unc-13 homolog D	protein-coding
28822	chr1	109622295	109622547	+	24	NA	intron (NM_001308170, intron 1 of 16)	intron (NM_001308170, intron 1 of 16)	1279	NM_004037	271		NM_004037	ENSG00000116337	AMPD2	AMPD|PCH9|SPG63	adenosine monophosphate deaminase 2	protein-coding
10492	chr13	110908157	110909365	+	24	NA	intron (NR_104586, intron 2 of 4)	intron (NR_104586, intron 2 of 4)	6308	NR_104587	55608		NM_017664	ENSG00000088448	ANKRD10	-	ankyrin repeat domain 10	protein-coding
12890	chr7	991351	991611	+	24	NA	intron (NR_156697, intron 4 of 4)	intron (NR_156697, intron 4 of 4)	8300	NM_017781	54905		NM_017781	ENSG00000073067	CYP2W1	-	cytochrome P450 family 2 subfamily W member 1	protein-coding
19893-2	chr17	80455929	80456246	+	24	NA	Intergenic	Intergenic	20520	NM_002522	4884		NM_002522	ENSG00000171246	NPTX1	NP1|SCA50	neuronal pentraxin 1	protein-coding
15132	chr1	109089590	109089990	+	24	NA	promoter-TSS (NR_136242)	promoter-TSS (NR_136242)	-974	NR_136242	56900		NM_020141	ENSG00000215717	TMEM167B	AD-020|C1orf119	transmembrane protein 167B	protein-coding
20795	chr3	8311112	8312467	+	24	NA	intron (NR_033378, intron 3 of 3)	intron (NR_033378, intron 3 of 3)	189869	NR_033378	100288428		NR_033378	ENSG00000227110	LMCD1-AS1	-	LMCD1 antisense RNA 1	ncRNA
57188	chr1	37482221	37483030	+	24	NA	intron (NM_001323550, intron 5 of 5)	intron (NM_001323550, intron 5 of 5)	2395	NR_106790	102465438		NR_106790	ENSG00000283724	MIR6732	hsa-mir-6732	microRNA 6732	ncRNA
13708	chr22	45310329	45311116	+	24	NA	intron (NM_001349915, intron 1 of 7)	CpG	788	NM_017911	55007		NM_017911	ENSG00000100376	FAM118A	C22orf8	family with sequence similarity 118 member A	protein-coding
15340	chr10	83544165	83544517	+	24	NA	Intergenic	MER89|LTR|ERV1	132748	NR_134317	105378397		NR_134317	ENSG00000233945	LINC02650	-	long intergenic non-protein coding RNA 2650	ncRNA
10753	chr3	172658645	172660058	+	24	NA	intron (NM_001146276, intron 1 of 4)	LTR22C0|LTR|ERVK	51716	NM_001146278	57552		NM_020792	ENSG00000144959	NCEH1	AADACL1|NCEH	neutral cholesterol ester hydrolase 1	protein-coding
18859	chr1	91768347	91768575	+	24	NA	intron (NR_036634, intron 4 of 17)	MSTA|LTR|ERVL-MaLR	117690	NR_036634	7049		NM_003243	ENSG00000069702	TGFBR3	BGCAN|betaglycan	transforming growth factor beta receptor 3	protein-coding
16862	chr3	53160620	53161199	+	24	NA	promoter-TSS (NM_006254)	promoter-TSS (NM_006254)	-300	NM_001354679	5580		NM_006254	ENSG00000163932	PRKCD	ALPS3|CVID9|MAY1|PKCD|nPKC-delta	protein kinase C delta	protein-coding
10629	chr16_KI270853v1_alt	1731922	1733681	+	24	NA	intron (NM_004996, intron 14 of 30).2	intron (NM_004996, intron 14 of 30).2	125203	NM_004996	4363		NM_004996	ENSG00000103222	ABCC1	ABC29|ABCC|DFNA77|GS-X|MRP|MRP1	ATP binding cassette subfamily C member 1 (ABCC1 blood group)	protein-coding
5280-2	chr5	51464851	51465438	+	24	NA	Intergenic	Intergenic	81696	NM_002202	3670		NM_002202	ENSG00000016082	ISL1	ISLET1|Isl-1	ISL LIM homeobox 1	protein-coding
19893	chr17	80453859	80453895	+	24	NA	Intergenic	Intergenic	22730	NM_002522	4884		NM_002522	ENSG00000171246	NPTX1	NP1|SCA50	neuronal pentraxin 1	protein-coding
8023	chr9	110971769	110972481	+	24	NA	5' UTR (NM_001351414, exon 4 of 6)	5' UTR (NM_001351414, exon 4 of 6)	64655	NM_001351420	1902		NM_001401	ENSG00000198121	LPAR1	EDG2|Gpcr26|LPA1|Mrec1.3|VZG1|edg-2|rec.1.3|vzg-1	lysophosphatidic acid receptor 1	protein-coding
7972	chr20	51306062	51306230	+	24	NA	Intergenic	MER4D1|LTR|ERV1	146831	NR_036162	100422889		NR_036162	ENSG00000266761	MIR3194	mir-3194	microRNA 3194	ncRNA
13100	chr14	23057727	23058830	+	24	NA	promoter-TSS (NM_022478)	promoter-TSS (NM_022478)	618	NR_169511	105370705		NR_169511	ENSG00000288795	LOC105370705	-	collagen alpha-2(I) chain-like	ncRNA
14465-2	chr1	75376976	75377923	+	24	NA	intron (NM_001320283, intron 1 of 21)	LTR5_Hs|LTR|ERVK	233665	NM_001130058	204962		NM_152697	ENSG00000137968	SLC44A5	CTL5	solute carrier family 44 member 5	protein-coding
12231-3	chr7	42933534	42933685	+	24	NA	intron (NR_156497, intron 1 of 3)	intron (NR_156497, intron 1 of 3)	1233	NM_031903	64983		NM_031903	ENSG00000106591	MRPL32	HSPC283|L32mt|MRP-L32|bL32m|bMRP-59b	mitochondrial ribosomal protein L32	protein-coding
7347	chr1	200411328	200412603	+	24	NA	Intergenic	MER21B|LTR|ERVL	-1929	NM_012482	23528		NM_012482	ENSG00000162702	ZNF281	GZP1|ZBP-99|ZBP99|ZNP-99	zinc finger protein 281	protein-coding
16869	chr12	93021256	93021430	+	24	NA	intron (NR_040096, intron 3 of 4)	intron (NR_040096, intron 3 of 4)	-92048	NM_003566	8411		NM_003566	ENSG00000102189	EEA1	MST105|MSTP105|ZFYVE2	early endosome antigen 1	protein-coding
20793-2	chr3	50610914	50611328	+	24	NA	promoter-TSS (NM_001243926)	promoter-TSS (NM_001243926)	653	NM_145071	1154		NM_013324	ENSG00000114737	CISH	BACTS2|CIS|CIS-1|G18|SOCS	cytokine inducible SH2 containing protein	protein-coding
21871	chr8	37902522	37902797	+	24	NA	Intergenic	L2c|LINE|L2	-3162	NM_001002814	80223		NM_025151	ENSG00000156675	RAB11FIP1	NOEL1A|RCP|rab11-FIP1	RAB11 family interacting protein 1	protein-coding
33127	chr10	79134782	79134962	+	24	NA	intron (NM_020338, intron 2 of 24)	AluSq|SINE|Alu	65906	NM_020338	57178		NM_020338	ENSG00000108175	ZMIZ1	MIZ|NEDDFSA|RAI17|TRAFIP10|ZIMP10	zinc finger MIZ-type containing 1	protein-coding
18809	chr12	49937271	49938233	+	24	NA	Intergenic	L2b|LINE|L2	-12985	NM_000486	359		NM_000486	ENSG00000167580	AQP2	AQP-CD|NDI2|WCH-CD	aquaporin 2	protein-coding
13126	chrY	13752640	13753107	+	23	NA	Intergenic	CpG	48974	NM_004202	9087		NM_004202	ENSG00000154620	TMSB4Y	TB4Y	thymosin beta 4 Y-linked	protein-coding
17530	chr12	53045413	53045638	+	23	NA	non-coding (NR_033854, exon 4 of 4)	non-coding (NR_033854, exon 4 of 4)	-1466	NM_198316	23371		NM_015319	ENSG00000111077	TNS2	C1-TEN|C1TEN|TENC1	tensin 2	protein-coding
19255-2	chr10	103207450	103207511	+	23	NA	Intergenic	HERVH-int|LTR|ERV1	-14174	NM_001351195	22978		NM_012229	ENSG00000076685	NT5C2	GMP|NT5B|PNT5|SPG45|SPG65|cN-II	5'-nucleotidase, cytosolic II	protein-coding
10444	chr17	4807610	4808245	+	23	NA	intron (NM_002663, intron 2 of 24)	intron (NM_002663, intron 2 of 24)	775	NM_002663	5338		NM_002663	ENSG00000129219	PLD2	PLD1C	phospholipase D2	protein-coding
21243	chr9	38064858	38064986	+	23	NA	intron (NM_003028, intron 1 of 5)	AluJo|SINE|Alu	4305	NM_003028	6461		NM_003028	ENSG00000107338	SHB	bA3J10.2	SH2 domain containing adaptor protein B	protein-coding
33881	chr22	36383263	36383929	+	23	NA	intron (NM_002473, intron 1 of 40)	intron (NM_002473, intron 1 of 40)	4371	NM_002473	4627		NM_002473	ENSG00000100345	MYH9	BDPLT6|DFNA17|EPSTS|FTNS|MATINS|MHA|NMHC-II-A|NMMHC-IIA|NMMHCA	myosin heavy chain 9	protein-coding
10389	chrX	17737474	17738249	+	23	NA	intron (NM_001037536, intron 1 of 5)	CpG	368	NM_001037536	6322		NM_006746	ENSG00000047634	SCML1	-	Scm polycomb group protein like 1	protein-coding
15614	chr11	77068361	77068485	+	23	NA	intron (NM_004055, intron 1 of 12)	L2b|LINE|L2	1452	NM_004055	726		NM_004055	ENSG00000149260	CAPN5	ADNIV|HTRA3|VRNI|nCL-3	calpain 5	protein-coding
18043	chr10	101290096	101290803	+	23	NA	Intergenic	Intergenic	-26899	NR_120621	101927419		NR_120621	ENSG00000229649	LINC02681	-	long intergenic non-protein coding RNA 2681	ncRNA
8469	chr3	185758483	185759809	+	23	NA	intron (NM_006548, intron 2 of 15)	intron (NM_006548, intron 2 of 15)	8758	NR_049838	100847078		NR_049838	ENSG00000265470	MIR548AQ	-	microRNA 548aq	ncRNA
16526	chr7	36927881	36927943	+	23	NA	intron (NM_014800, intron 16 of 21)	intron (NM_014800, intron 16 of 21)	-8480	NR_031604	100302113		NR_031604	ENSG00000221325	MIR1200	MIRN1200|hsa-mir-1200	microRNA 1200	ncRNA
14289	chr1	145978436	145978487	+	23	NA	3' UTR (NM_001330685, exon 7 of 7)	3' UTR (NM_001330685, exon 7 of 7)	13771	NM_032305	84265		NM_032305	ENSG00000121851	POLR3GL	RPC32HOM|SOFM|flj32422	RNA polymerase III subunit GL	protein-coding
31929	chr9	129484454	129484986	+	23	NA	Intergenic	MIRb|SINE|MIR	-3940	NR_038955	100506190		NR_038955		LINC00963	MetaLnc9	long intergenic non-protein coding RNA 963	ncRNA
5333-3	chr17	7355919	7356667	+	23	NA	intron (NM_001320435, intron 5 of 6)	intron (NM_001320435, intron 5 of 6)	1137	NM_001320436	339168		NM_198154	ENSG00000182896	TMEM95	UNQ9390	transmembrane protein 95	protein-coding
19255	chr10	103204234	103207307	+	23	NA	Intergenic	LTR7Y|LTR|ERV1	-12464	NM_001351195	22978		NM_012229	ENSG00000076685	NT5C2	GMP|NT5B|PNT5|SPG45|SPG65|cN-II	5'-nucleotidase, cytosolic II	protein-coding
3658-3	chr14_GL000225v1_random	87949	88468	+	23	NA	NA	BSR/Beta|Satellite|Satellite	NA	NA
17180	chr17	81927657	81929409	+	23	NA	promoter-TSS (NM_002359)	promoter-TSS (NM_002359)	704	NR_015454	92659		NR_015454	ENSG00000265688	MILIP	MAFG-AS1|MAFG-DT	MYC inducible lncRNA inactivating p53	ncRNA
52394	chr19	18434917	18435383	+	23	NA	TTS (NM_001009998)	TTS (NM_001009998)	2159	NM_001253389	51477		NM_016368	ENSG00000105655	ISYNA1	INO1|INOS|IPS|IPS 1|IPS-1	inositol-3-phosphate synthase 1	protein-coding
14956	chr8	9078848	9079232	+	23	NA	intron (NM_001354638, intron 6 of 7)	intron (NM_001354638, intron 6 of 7)	-20410	NR_145772	109616996		NR_145772		SNORD3I	-	small nucleolar RNA, C/D box 3I	snoRNA
14564	chr16	4941944	4941957	+	23	NA	Intergenic	AluSz|SINE|Alu	-4802	NM_002705	5493		NM_002705	ENSG00000118898	PPL	-	periplakin	protein-coding
5969-2	chr7	35758162	35758879	+	23	NA	intron (NR_120511, intron 3 of 5)	intron (NR_120511, intron 3 of 5)	42083	NR_108083	100506725		NR_108082	ENSG00000227544	LINC03013	-	long intergenic non-protein coding RNA 3013	ncRNA
9058	chr3	32794273	32795345	+	23	NA	Intergenic	Intergenic	-23188	NM_001039111	131405		NM_001039111	ENSG00000206557	TRIM71	HYC4|HYDCC1|LIN-41|LIN41	tripartite motif containing 71	protein-coding
14301	chr2	166610180	166610858	+	23	NA	Intergenic	HERVK22-int|LTR|ERVK	-116270	NM_002976	6332		NM_002976	ENSG00000136546	SCN7A	NaG|Nav2.1|Nav2.2|SCN6A	sodium voltage-gated channel alpha subunit 7	protein-coding
26394	chr1	3452065	3452931	+	23	NA	Intergenic	Intergenic	-2167	NM_014448	27237		NM_014448	ENSG00000130762	ARHGEF16	GEF16|NBR	Rho guanine nucleotide exchange factor 16	protein-coding
27214	chr1	26470410	26470534	+	23	NA	3' UTR (NM_001319959, exon 9 of 9)	3' UTR (NM_001319959, exon 9 of 9)	-1968	NM_005517	3151		NM_005517	ENSG00000198830	HMGN2	HMG17	high mobility group nucleosomal binding domain 2	protein-coding
40843	chr8	102653568	102654239	+	23	NA	promoter-TSS (NM_001032282)	promoter-TSS (NM_001032282)	61	NR_103760	7071		NM_005655	ENSG00000155090	KLF10	EGR-alpha|EGRA|TIEG|TIEG1	KLF transcription factor 10	protein-coding
11667	chr19	57824828	57825255	+	23	NA	TTS (NR_024162)	TTS (NR_024162)	2421	NR_024162	2282		NR_024162		FKBP1AP1	FKBP12|FKBP1P1	FKBP prolyl isomerase 1A pseudogene 1	pseudo
22904	chr6	53066651	53066697	+	23	NA	intron (NM_033480, intron 1 of 12)	intron (NM_033480, intron 1 of 12)	1270	NM_033480	26268		NM_012347	ENSG00000112146	FBXO9	FBX9|NY-REN-57|VCIA1|dJ341E18.2	F-box protein 9	protein-coding
8072-2	chr20	56468078	56469395	+	23	NA	exon (NM_001283035, exon 1 of 10)	exon (NM_001283035, exon 1 of 10)	109	NM_016407	51507		NM_016407	ENSG00000022277	RTF2	C20orf43|CDAO5|HSPC164|RTFDC1|SHUJUN-3	replication termination factor 2	protein-coding
10136	chr3	122760634	122761517	+	23	NA	intron (NM_024610, intron 3 of 7)	L2c|LINE|L2	32756	NM_001320728	79663		NM_024610	ENSG00000169087	HSPBAP1	PASS1	HSPB1 associated protein 1	protein-coding
12794	chr9	91038916	91039049	+	23	NA	Intergenic	Intergenic	36150	NR_033912	100129316		NR_033912		LOC100129316	-	uncharacterized LOC100129316	ncRNA
26290	chrX	49040986	49041330	+	23	NA	intron (NM_001282142, intron 1 of 9)	AluSc|SINE|Alu	2199	NM_006521	7030		NM_006521	ENSG00000068323	TFE3	MRXSPF|RCCP2|RCCX1|TFEA|bHLHe33	transcription factor binding to IGHM enhancer 3	protein-coding
5313-2	chr7	7176901	7177688	+	23	NA	Intergenic	Intergenic	-5250	NM_020156	56913		NM_020156	ENSG00000106392	C1GALT1	C1GALT|T-synthase	core 1 synthase, glycoprotein-N-acetylgalactosamine 3-beta-galactosyltransferase 1	protein-coding
47848	chr1	230754519	230755106	+	23	NA	intron (NM_001319676, intron 1 of 17)	AluJr|SINE|Alu	7424	NM_006615	10753		NM_006615	ENSG00000135773	CAPN9	GC36|nCL-4	calpain 9	protein-coding
25479	chr1	225887124	225887571	+	23	NA	intron (NM_020997, intron 3 of 3)	intron (NM_020997, intron 3 of 3)	1799	NM_020997	10637		NM_020997	ENSG00000243709	LEFTY1	LEFTB|LEFTYB	left-right determination factor 1	protein-coding
30499	chr3	47423473	47424914	+	23	NA	intron (NM_001320044, intron 5 of 19)	intron (NM_001320044, intron 5 of 19)	43172	NM_001304482	25930		NM_015466	ENSG00000076201	PTPN23	HD-PTP|HDPTP|NEDBASS|PTP-TD14	protein tyrosine phosphatase non-receptor type 23	protein-coding
28901	chr22	50522194	50523317	+	23	NA	TTS (NM_005138)	TTS (NM_005138)	2843	NM_005138	9997		NM_005138	ENSG00000284194	SCO2	CEMCOX1|ECGF1|Gliostatin|MC4DN2|MYP6|PD-ECGF|SCO1L|TP|TYMP|TdRPase	synthesis of cytochrome C oxidase 2	protein-coding
19401	chr19	42255576	42256190	+	23	NA	promoter-TSS (NM_006494)	promoter-TSS (NM_006494)	-755	NM_006494	2077		NM_006494	ENSG00000105722	ERF	CHYTS|CRS4|PE-2|PE2	ETS2 repressor factor	protein-coding
20411	chr2	134447999	134448018	+	23	NA	intron (NM_001371457, intron 16 of 16)	intron (NM_001371457, intron 16 of 16)	193936	NM_002410	4249		NM_002410	ENSG00000152127	MGAT5	GNT-V|GNT-VA|MGAT5A|glcNAc-T V	alpha-1,6-mannosylglycoprotein 6-beta-N-acetylglucosaminyltransferase	protein-coding
22044	chr3	52407720	52407944	+	23	NA	intron (NM_004656, intron 5 of 16)	intron (NM_004656, intron 5 of 16)	2176	NM_004656	8314		NM_004656	ENSG00000163930	BAP1	HUCEP-13|KURIS|TPDS1|UBM2|UCHL2|UVM2|hucep-6	BRCA1 associated protein 1	protein-coding
14956-2	chr8	9076376	9078208	+	23	NA	intron (NM_001354638, intron 6 of 7)	intron (NM_001354638, intron 6 of 7)	-18662	NR_145772	109616996		NR_145772		SNORD3I	-	small nucleolar RNA, C/D box 3I	snoRNA
8085	chr2	68062549	68063393	+	23	NA	promoter-TSS (NM_001190265)	promoter-TSS (NM_001190265)	33	NM_001190263	10438		NM_006333	ENSG00000197223	C1D	LRP1|Rrp47|SUN-CoR|SUNCOR|hC1D	C1D nuclear receptor corepressor	protein-coding
26535	chr5	40732899	40733248	+	23	NA	intron (NM_012382, intron 2 of 4)	intron (NM_012382, intron 2 of 4)	22888	NM_012382	23548		NM_012382	ENSG00000113638	TTC33	OSRF	tetratricopeptide repeat domain 33	protein-coding
6185	chr11	16124354	16125227	+	23	NA	intron (NM_001145811, intron 6 of 14)	L2a|LINE|L2	-155169	NR_106721	102464826		NR_106721	ENSG00000284094	MIR6073	hsa-mir-6073	microRNA 6073	ncRNA
11639	chr13	98575206	98576788	+	22	NA	intron (NM_001286649, intron 1 of 9)	intron (NM_001286649, intron 1 of 9)	1110	NM_001032296	8428		NM_003576	ENSG00000102572	STK24	HEL-S-95|MST3|MST3B|STE20|STK3	serine/threonine kinase 24	protein-coding
12001	chr12	105234335	105234940	+	22	NA	intron (NM_018171, intron 1 of 20)	intron (NM_018171, intron 1 of 20)	-1232	NM_001251905	55198		NM_018171	ENSG00000136044	APPL2	DIP13B	adaptor protein, phosphotyrosine interacting with PH domain and leucine zipper 2	protein-coding
22319	chr7	1026755	1027909	+	22	NA	intron (NR_134538, intron 1 of 1)	CpG	1037	NR_146967	84310		NM_032350	ENSG00000146540	C7orf50	Cholesin|YCR016W	chromosome 7 open reading frame 50	protein-coding
6167-3	chr9	71760358	71761523	+	22	NA	intron (NM_001135820, intron 1 of 22)	intron (NM_001135820, intron 1 of 22)	7573	NM_001135820	23670		NM_013390	ENSG00000135048	CEMIP2	TMEM2	cell migration inducing hyaluronidase 2	protein-coding
29912	chr14	76955111	76955374	+	22	NA	Intergenic	AluSx1|SINE|Alu	-4396	NR_133913	105370578		NR_133913	ENSG00000258602	LINC01629	linc-KIAA1737-2	long intergenic non-protein coding RNA 1629	ncRNA
8755	chr13	90502229	90503612	+	22	NA	intron (NR_120414, intron 2 of 5)	MER77|LTR|ERVL	9632	NR_120414	101927224		NR_120414		LINC01049	-	long intergenic non-protein coding RNA 1049	ncRNA
28291	chr22	35314156	35314672	+	22	NA	intron (NR_156428, intron 1 of 13)	intron (NR_156428, intron 1 of 13)	14520	NR_024195	10043		NM_005488	ENSG00000100284	TOM1	IMD85	target of myb1 membrane trafficking protein	protein-coding
13438	chr7	128259164	128260758	+	22	NA	Intergenic	LTR8|LTR|ERV1	18683	NM_000230	3952		NM_000230	ENSG00000174697	LEP	LEPD|OB|OBS	leptin	protein-coding
11713-5	chr8	32547401	32549166	+	22	NA	promoter-TSS (NM_004495)	promoter-TSS (NM_004495)	-28	NM_001160007	3084		NM_004495	ENSG00000157168	NRG1	ARIA|GGF|GGF2|HGL|HRG|HRG1|HRGA|MST131|MSTP131|NDF|NRG1-IT2|SMDF	neuregulin 1	protein-coding
9846	chr5	147200449	147200819	+	22	NA	intron (NR_147190, intron 2 of 3)	intron (NR_147190, intron 2 of 3)	34225	NR_147190	105378217		NR_147190		STK32A-AS1	-	STK32A antisense RNA 1	ncRNA
6025-2	chr14	31991279	31991931	+	22	NA	Intergenic	Intergenic	46752	NR_146544	105370439		NR_146544	ENSG00000258474	LINC02313	-	long intergenic non-protein coding RNA 2313	ncRNA
31595	chr3	184332902	184333921	+	22	NA	intron (NM_198244, intron 29 of 29)	L2c|LINE|L2	-2515	NM_001366134	131408		NM_144635	ENSG00000175182	FAM131A	C3orf40|FLAT715|PRO1378	family with sequence similarity 131 member A	protein-coding
5559	chr1	6822591	6823215	+	22	NA	intron (NM_001242701, intron 2 of 3)	intron (NM_001242701, intron 2 of 3)	37449	NR_146204	23261		NM_015215	ENSG00000171735	CAMTA1	CANPMR|CECBA	calmodulin binding transcription activator 1	protein-coding
6670-3	chr6	110360684	110361372	+	22	NA	Intergenic	Intergenic	-2756	NM_001354594	728464		NM_001123364	ENSG00000053328	METTL24	C6orf186	methyltransferase like 24	protein-coding
36961	chr22_KI270733v1_random	124848	125411	+	22	NA	promoter-TSS (NR_146146).4	promoter-TSS (NR_146146).4	-245	NR_162111	113218488		NR_162111		MIR10396B	-	microRNA 10396b	ncRNA
43380	chr9	113596338	113596927	+	22	NA	intron (NM_134427, intron 4 of 4)	intron (NM_134427, intron 4 of 4)	2503	NM_001276262	5998		NM_017790	ENSG00000138835	RGS3	C2PA|RGP3	regulator of G protein signaling 3	protein-coding
7082	chr19	6725244	6726382	+	22	NA	Intergenic	MIR|SINE|MIR	-5163	NM_000064	718		NM_000064	ENSG00000125730	C3	AHUS5|ARMD9|ASP|C3a|C3b|CPAMD1|HEL-S-62p	complement C3	protein-coding
12436	chr20	32819575	32819920	+	22	NA	promoter-TSS (NM_012325)	promoter-TSS (NM_012325)	-207	NM_012325	22919		NM_012325	ENSG00000101367	MAPRE1	EB1	microtubule associated protein RP/EB family member 1	protein-coding
13148	chr7	75442269	75443338	+	22	NA	intron (NM_001099415, intron 3 of 14)	CpG	32481	NR_104013	155400		NM_001039575	ENSG00000291151	NSUN5P1	NSUN5B|WBSCR20B	NSUN5 pseudogene 1	pseudo
6164-2	chr22	42649454	42650324	+	22	NA	promoter-TSS (NM_000398)	promoter-TSS (NM_000398)	-497	NM_000398	1727		NM_000398	ENSG00000100243	CYB5R3	B5R|DIA1	cytochrome b5 reductase 3	protein-coding
7581	chr22	31488906	31489511	+	22	NA	intron (NM_019843, intron 1 of 18)	CpG	348	NM_001164501	56478		NM_019843	ENSG00000184708	EIF4ENIF1	4E-T|Clast4	eukaryotic translation initiation factor 4E nuclear import factor 1	protein-coding
7559	chr12	124567663	124568358	+	22	NA	promoter-TSS (NM_006312)	promoter-TSS (NM_006312)	-398	NM_006312	9612		NM_006312	ENSG00000196498	NCOR2	CTG26|N-CoR2|SMAP270|SMRT|SMRTE|SMRTE-tau|TNRC14|TRAC|TRAC-1|TRAC1	nuclear receptor corepressor 2	protein-coding
13486	chr10	119251462	119252854	+	22	NA	intron (NM_005308, intron 1 of 15)	intron (NM_005308, intron 1 of 15)	44587	NM_005308	2869		NM_005308	ENSG00000198873	GRK5	FP2025|GPRK5	G protein-coupled receptor kinase 5	protein-coding
7793	chr3	133479909	133480633	+	22	NA	intron (NR_135276, intron 1 of 4)	intron (NR_135276, intron 1 of 4)	10875	NR_135276	85003		NR_135276	ENSG00000249993	BFSP2-AS1	-	BFSP2 antisense RNA 1	ncRNA
13138	chr11	1833179	1833279	+	22	NA	Intergenic	Intergenic	-1198	NM_001290334	90019		NM_138567	ENSG00000149043	SYT8	-	synaptotagmin 8	protein-coding
4903	chr18	8890966	8891454	+	22	NA	Intergenic	MER77B|LTR|ERVL	173829	NM_015210	23255		NM_015210	ENSG00000168502	MTCL1	CCDC165|KIAA0802|SOGA2	microtubule crosslinking factor 1	protein-coding
7381	chr14	34460984	34461047	+	22	NA	intron (NM_138288, intron 1 of 1)	intron (NM_138288, intron 1 of 1)	1225	NM_138288	171546		NM_138288	ENSG00000165389	SPTSSA	C14orf147|SPG90A|SPG90B|SSSPTA	serine palmitoyltransferase small subunit A	protein-coding
16811	chr5	172452219	172452444	+	22	NA	intron (NM_001308175, intron 1 of 12)	intron (NM_001308175, intron 1 of 12)	2192	NM_001308175	285590		NM_001017995	ENSG00000174705	SH3PXD2B	FAD49|FTHS|HOFI|KIAA1295|TKS4|TSK4	SH3 and PX domains 2B	protein-coding
8313	chr2	9251266	9252552	+	22	NA	intron (NM_001135191, intron 1 of 26)	intron (NM_001135191, intron 1 of 26)	45097	NM_003887	8853		NM_003887	ENSG00000151693	ASAP2	AMAP2|CENTB3|DDEF2|PAG3|PAP|Pap-alpha|SHAG1	ArfGAP with SH3 domain, ankyrin repeat and PH domain 2	protein-coding
8497	chr14	37566695	37567455	+	22	NA	Intergenic	AmnSINE2|SINE|tRNA-Deu	28174	NM_004496	3169		NM_004496	ENSG00000129514	FOXA1	HNF3A|TCF3A	forkhead box A1	protein-coding
7542-2	chr10	47557809	47558658	+	22	NA	Intergenic	Intergenic	-4710	NR_024495	642826		NR_024495		BMS1P2	BMS1LP2|BMS1LP6|BMS1P6|bA144G6.1	BMS1 pseudogene 2	pseudo
17498	chr20	47347640	47349206	+	22	NA	intron (NM_001281781, intron 1 of 20)	intron (NM_001281781, intron 1 of 20)	3326	NM_001363741	23613		NM_012408	ENSG00000101040	ZMYND8	PRKCBP1|PRO2893|RACK7	zinc finger MYND-type containing 8	protein-coding
6439	chr13	79861674	79862513	+	22	NA	Intergenic	Intergenic	-10493	NR_120413	101927195		NR_120413	ENSG00000229175	LINC00382	TCONS_00021500	long intergenic non-protein coding RNA 382	ncRNA
26193	chr19	39405228	39405228	+	22	NA	Intergenic	AluSz|SINE|Alu	-1619	NM_003407	7538		NM_003407	ENSG00000128016	ZFP36	G0S24|GOS24|NUP475|RNF162A|TIS11|TTP|zfp-36	ZFP36 ring finger protein	protein-coding
7245	chr5	126718024	126718673	+	22	NA	Intergenic	GA-rich|Low_complexity|Low_complexity	58138	NR_134485	102723557		NR_134485	ENSG00000251072	LMNB1-DT	-	LMNB1 divergent transcript	ncRNA
48997	chr3	46990438	46990495	+	22	NA	intron (NM_001365116, intron 6 of 52)	intron (NM_001365116, intron 6 of 52)	2476	NM_001365116	23218		NM_015175	ENSG00000160796	NBEAL2	BDPLT4|GPS	neurobeachin like 2	protein-coding
32951	chr2	20188062	20188510	+	22	NA	Intergenic	Intergenic	36844	NM_002997	6382		NM_002997	ENSG00000115884	SDC1	CD138|SDC|SYND1|syndecan	syndecan 1	protein-coding
11713-4	chr3	194315068	194316111	+	22	NA	Intergenic	Intergenic	-2785	NR_024480	100131551		NR_024480	ENSG00000214145	LINC00887	ACLY-BP|HEIRCC	long intergenic non-protein coding RNA 887	ncRNA
21680	chr7	104925394	104925836	+	22	NA	intron (NR_027374, intron 1 of 3)	AluSg|SINE|Alu	1030	NR_027374	723809		NR_027374	ENSG00000225329	LHFPL3-AS2	lncPENG	LHFPL3 antisense RNA 2	ncRNA
16329	chr20	4170157	4170165	+	22	NA	intron (NM_175840, intron 1 of 7)	intron (NM_175840, intron 1 of 7)	21333	NM_175839	54498		NM_019025	ENSG00000088826	SMOX	C20orf16|PAO|PAO-1|PAO1|PAOH|PAOH1|SMO	spermine oxidase	protein-coding
10580-2	chr2	207800530	207802037	+	22	NA	Intergenic	Intergenic	-31377	NM_003468	7855		NM_003468	ENSG00000163251	FZD5	C2orf31|HFZ5|MCOPCB11	frizzled class receptor 5	protein-coding
18528	chr4	930504	930929	+	22	NA	intron (NM_005255, intron 1 of 27)	intron (NM_005255, intron 1 of 27)	1600	NM_005255	2580		NM_005255	ENSG00000178950	GAK	DNAJ26|DNAJC26	cyclin G associated kinase	protein-coding
15489	chr3	79017414	79017926	+	22	NA	intron (NM_002941, intron 3 of 30)	intron (NM_002941, intron 3 of 30)	1789	NM_133631	6091		NM_002941	ENSG00000169855	ROBO1	CPHD8|DUTT1|NORS|NYS8|SAX3	roundabout guidance receptor 1	protein-coding
18146	chr1	45009901	45009953	+	22	NA	intron (NM_024602, intron 4 of 20)	intron (NM_024602, intron 4 of 20)	1397	NM_024602	79654		NM_024602	ENSG00000126107	HECTD3	-	HECT domain E3 ubiquitin protein ligase 3	protein-coding
8435	chr4	38160472	38161412	+	22	NA	Intergenic	MLT1I|LTR|ERVL-MaLR	40988	NM_001253915	23216		NM_015173	ENSG00000065882	TBC1D1	TBC|TBC1	TBC1 domain family member 1	protein-coding
14134	chr7	44045743	44046063	+	22	NA	intron (NM_001284313, intron 1 of 10)	intron (NM_001284313, intron 1 of 10)	1201	NM_014063	28988		NM_014063	ENSG00000136279	DBNL	ABP1|HIP-55|HIP55|SH3P7	drebrin like	protein-coding
9910	chr16	53990973	53991967	+	22	NA	intron (NM_001363988, intron 9 of 9)	intron (NM_001363988, intron 9 of 9)	-47923	NR_103838	100505692		NR_103838		FTO-IT1	-	FTO intronic transcript 1	ncRNA
12762	chr1	69411545	69413457	+	22	NA	Intergenic	MIRb|SINE|MIR	-20754	NR_147164	105378788		NR_147164	ENSG00000229639	LINC01758	-	long intergenic non-protein coding RNA 1758	ncRNA
7824	chrX	135973155	135973781	+	22	NA	intron (NM_173470, intron 1 of 3)	intron (NM_173470, intron 1 of 3)	520	NM_173470	93380		NM_173470	ENSG00000169446	MMGT1	EMC5|TMEM32	membrane magnesium transporter 1	protein-coding
15761	chr4	53886778	53886871	+	22	NA	Intergenic	L1MB7|LINE|L1	100458	NR_027153	402176		NM_001011538		RPL21P44	RPL21_17_477	ribosomal protein L21 pseudogene 44	pseudo
7935	chr8	112735534	112736875	+	22	NA	intron (NM_198123, intron 13 of 70)	intron (NM_198123, intron 13 of 70)	92711	NR_031745	100302225		NR_031745	ENSG00000238399	MIR2053	hsa-mir-2053	microRNA 2053	ncRNA
2780-4	chr16	34589083	34589585	+	22	NA	Intergenic	Intergenic	-207854	NR_158158	102724928		NR_158158		CCNYL3	CCNYL1B	cyclin Y like 3 (pseudogene)	pseudo
17064	chr17	50057499	50057540	+	22	NA	intron (NM_002204, intron 1 of 25)	intron (NM_002204, intron 1 of 25)	1409	NM_002204	3675		NM_002204	ENSG00000005884	ITGA3	CD49C|FRP-2|GAP-B3|GAPB3|ILNEB|JEB7|MSK18|VCA-2|VL3A|VLA3a	integrin subunit alpha 3	protein-coding
19940	chr9	128944823	128945218	+	22	NA	TTS (NM_014908)	TTS (NM_014908)	2583	NM_014908	22845		NM_014908	ENSG00000175283	DOLK	CDG1M|DK|DK1|SEC59|TMEM15	dolichol kinase	protein-coding
20000	chr11	72784286	72785201	+	22	NA	intron (NM_006645, intron 1 of 6)	intron (NM_006645, intron 1 of 6)	1213	NR_039841	100616410		NR_039841	ENSG00000265064	MIR4692	-	microRNA 4692	ncRNA
28811	chr18	61737160	61737795	+	22	NA	Intergenic	Intergenic	-10699	NR_103449	100996669		NR_103449		LINC01544	-	long intergenic non-protein coding RNA 1544	ncRNA
16779	chr19	44907160	44907168	+	22	NA	intron (NM_000041, intron 2 of 3)	AluSx|SINE|Alu	763	NM_001302690	348		NM_000041	ENSG00000130203	APOE	AD2|APO-E|ApoE4|LDLCQ5|LPG	apolipoprotein E	protein-coding
6991	chr15	55652035	55652874	+	22	NA	intron (NM_173814, intron 11 of 19)	intron (NM_173814, intron 11 of 19)	-63483	NM_015617	26108		NM_015617	ENSG00000171016	PYGO1	-	pygopus family PHD finger 1	protein-coding
14743	chr12	104458962	104458987	+	22	NA	intron (NM_018413, intron 1 of 2)	intron (NM_018413, intron 1 of 2)	2026	NM_001173982	50515		NM_018413	ENSG00000171310	CHST11	C4ST|C4ST-1|C4ST1|HSA269537|OCBMD	carbohydrate sulfotransferase 11	protein-coding
7872-2	chr2	152467604	152468277	+	22	NA	intron (NM_052905, intron 1 of 25)	MIR|SINE|MIR	132766	NM_052905	114793		NM_052905	ENSG00000157827	FMNL2	FHOD2	formin like 2	protein-coding
11523-3	chr7	39733108	39733980	+	22	NA	promoter-TSS (NR_026999)	promoter-TSS (NR_026999)	-24	NR_026999	349114		NM_198284		LINC00265	NCRNA00265	long intergenic non-protein coding RNA 265	ncRNA
18930	chr16	535367	535964	+	22	NA	TTS (NR_049852)	TTS (NR_049852)	349	NR_049852	100847028		NR_049852	ENSG00000266124	MIR5587	-	microRNA 5587	ncRNA
8191	chr1	32740137	32740546	+	22	NA	Intergenic	Intergenic	-1489	NM_020888	57648		NM_020888	ENSG00000162522	NHSL3	KIAA1522	NHS like 3	protein-coding
14536	chr5	57694820	57696544	+	22	NA	Intergenic	MamRep1527|LTR|LTR	45022	NR_104668	101928505		NR_104668	ENSG00000287709	LOC101928505	-	uncharacterized LOC101928505	ncRNA
12235	chr16	89169296	89169840	+	22	NA	TTS (NR_046200)	TTS (NR_046200)	-2180	NM_004933	1013		NM_004933	ENSG00000129910	CDH15	CDH14|CDH3|CDHM|MCAD|MRD3	cadherin 15	protein-coding
17681	chr9	126586408	126586503	+	22	NA	Intergenic	MIRb|SINE|MIR	-27473	NM_001174146	4010		NM_002316	ENSG00000136944	LMX1B	FSGS10|LMX1.2|NPS1	LIM homeobox transcription factor 1 beta	protein-coding
17487	chr13	33230802	33231138	+	22	NA	intron (NM_001243476, intron 5 of 17)	L2c|LINE|L2	-24920	NM_001243474	90627		NM_052851	ENSG00000133121	STARD13	ARHGAP37|DLC2|GT650|LINC00464	StAR related lipid transfer domain containing 13	protein-coding
12857	chr17	6652034	6652204	+	21	NA	promoter-TSS (NM_016060)	promoter-TSS (NM_016060)	357	NM_001105520	388327		NM_001105520	ENSG00000256806	C17orf100	-	chromosome 17 open reading frame 100	protein-coding
4540	chr11	93739811	93740424	+	21	NA	intron (NM_024116, intron 1 of 5)	AluJb|SINE|Alu	1378	NM_024116	79101		NM_024116	ENSG00000166012	TAF1D	JOSD3|RAFI41|TAF(I)41|TAFI41	TATA-box binding protein associated factor, RNA polymerase I subunit D	protein-coding
29468	chr14	76965172	76966090	+	21	NA	non-coding (NR_133913, exon 3 of 3)	non-coding (NR_133913, exon 3 of 3)	5993	NR_133913	105370578		NR_133913	ENSG00000258602	LINC01629	linc-KIAA1737-2	long intergenic non-protein coding RNA 1629	ncRNA
19216	chr19	58409342	58409783	+	21	NA	intron (NR_134461, intron 1 of 4)	intron (NR_134461, intron 1 of 4)	888	NM_001318002	201514		NM_173548	ENSG00000171574	ZNF584	-	zinc finger protein 584	protein-coding
9309-2	chr16	56357148	56357156	+	21	NA	3' UTR (NM_020988, exon 9 of 9)	3' UTR (NM_020988, exon 9 of 9)	67837	NM_001323511	267		NM_001144	ENSG00000159461	AMFR	GP78|RNF45|SPG89	autocrine motility factor receptor	protein-coding
9417	chr6	77650121	77651190	+	21	NA	5' UTR (NM_001282136, exon 1 of 5)	5' UTR (NM_001282136, exon 1 of 5)	381	NM_001282136	101928601		NM_001282136	ENSG00000269964	MEI4	-	meiotic double-stranded break formation protein 4	protein-coding
6507	chr18	22466211	22467213	+	21	NA	Intergenic	L2b|LINE|L2	-48797	NM_172241	64693		NM_022663	ENSG00000212710	CTAGE1	CT21.1|CT21.2|CTAGE|CTAGE-1|CTAGE-2	cutaneous T cell lymphoma-associated antigen 1	protein-coding
19316	chr11	114097977	114097986	+	21	NA	intron (NM_001354751, intron 2 of 6)	intron (NM_001354751, intron 2 of 6)	34770	NM_001354752	7704		NM_006006	ENSG00000109906	ZBTB16	PLZF|ZNF145	zinc finger and BTB domain containing 16	protein-coding
7820-3	chr4	25376661	25377813	+	21	NA	promoter-TSS (NM_001286756)	promoter-TSS (NM_001286756)	-26	NM_001286756	29945		NM_013367	ENSG00000053900	ANAPC4	APC4	anaphase promoting complex subunit 4	protein-coding
6560	chr14	25091973	25092757	+	21	NA	Intergenic	Intergenic	-42068	NM_001304476	29091		NM_014178	ENSG00000168952	STXBP6	HSPC156|amisyn	syntaxin binding protein 6	protein-coding
18979	chr17	17717443	17718176	+	21	NA	intron (NM_030665, intron 1 of 5)	intron (NM_030665, intron 1 of 5)	36351	NM_030665	10743		NM_017574	ENSG00000108557	RAI1	SMCR|SMS	retinoic acid induced 1	protein-coding
5430	chr1	171313726	171314211	+	21	NA	promoter-TSS (NM_002022)	promoter-TSS (NM_002022)	-215	NM_002022	2329		NM_002022	ENSG00000076258	FMO4	FMO2	flavin containing dimethylaniline monoxygenase 4	protein-coding
9640	chr3	120864512	120865355	+	21	NA	Intergenic	Intergenic	-28576	NR_135571	101926983		NR_135570	ENSG00000243593	LINC02049	-	long intergenic non-protein coding RNA 2049	ncRNA
8015-2	chr2	75920648	75921782	+	21	NA	Intergenic	Intergenic	-210300	NM_001201335	6936		NM_003203	ENSG00000005436	GCFC2	C2orf3|DNABF|GCF|TCF9	GC-rich sequence DNA-binding factor 2	protein-coding
16147	chr9	93211561	93212136	+	21	NA	intron (NM_001282394, intron 1 of 29)	(CTCA)n|Simple_repeat|Simple_repeat	26918	NM_001282394	65268		NM_006648	ENSG00000165238	WNK2	NY-CO-43|P/OKcl.13|PRKWNK2|SDCCAG43	WNK lysine deficient protein kinase 2	protein-coding
7820-2	chr4	25376338	25376541	+	21	NA	promoter-TSS (NM_001286756)	promoter-TSS (NM_001286756)	-824	NM_001286756	29945		NM_013367	ENSG00000053900	ANAPC4	APC4	anaphase promoting complex subunit 4	protein-coding
14115	chr4	76274289	76276122	+	21	NA	intron (NM_001136570, intron 5 of 7)	intron (NM_001136570, intron 5 of 7)	23484	NM_001136570	100129583		NM_001136570	ENSG00000189157	FAM47E	-	family with sequence similarity 47 member E	protein-coding
16605	chrX	44541333	44541772	+	21	NA	intron (NM_173794, intron 2 of 4)	intron (NM_173794, intron 2 of 4)	1307	NM_173794	139341		NM_173794	ENSG00000069509	FUNDC1	-	FUN14 domain containing 1	protein-coding
9900-2	chr4	140742767	140742917	+	21	NA	intron (NM_015130, intron 1 of 20)	GA-rich|Low_complexity|Low_complexity	13543	NM_015130	23158		NM_015130	ENSG00000109436	TBC1D9	GRAMD9|MDR1	TBC1 domain family member 9	protein-coding
8155	chr18	27967977	27968682	+	21	NA	intron (NM_001792, intron 14 of 15)	intron (NM_001792, intron 14 of 15)	68312	NM_001308176	1000		NM_001792	ENSG00000170558	CDH2	ACOGS|ADHD8|ARVD14|CD325|CDHN|CDw325|NCAD	cadherin 2	protein-coding
13511	chr6	10748784	10749397	+	21	NA	intron (NM_030969, intron 1 of 5)	MIR|SINE|MIR	1285	NM_030969	81853		NM_030969	ENSG00000137210	TMEM14B	-	transmembrane protein 14B	protein-coding
11050	chr9	76802873	76803857	+	21	NA	intron (NM_001308047, intron 6 of 17)	intron (NM_001308047, intron 6 of 17)	38929	NR_132312	50652		NR_015342	ENSG00000225937	PCA3	DD3|NCRNA00019|PCAT3|PRUNE2-AS1	prostate cancer associated 3	ncRNA
9782	chr22	18061010	18061937	+	21	NA	Intergenic	Intergenic	-16517	NM_017929	55670		NM_017929	ENSG00000215193	PEX26	PBD7A|PBD7B|PEX26M1T|Pex26pM1T	peroxisomal biogenesis factor 26	protein-coding
5688	chr2	37768661	37769050	+	21	NA	Intergenic	Intergenic	60856	NR_110011	101929559		NR_110011	ENSG00000237803	PIRAT1	LINC00211|NCRNA00211|PIRAT	PU.1 (SPI1) induced regulator of S100A8 and S100A9 alarmin transcription 1	ncRNA
9467	chr9	94553839	94553991	+	21	NA	Intergenic	Intergenic	-1130	NR_121567	101928099		NR_121566	ENSG00000231806	PCAT7	PCAN-R2	prostate cancer associated transcript 7	ncRNA
9803	chr1	26337155	26337200	+	21	NA	intron (NM_001039775, intron 10 of 19)	intron (NM_001039775, intron 10 of 19)	16953	NM_001039775	55057		NM_017977	ENSG00000176092	CRYBG2	AIM1L	crystallin beta-gamma domain containing 2	protein-coding
20703	chr6	167202659	167202688	+	21	NA	Intergenic	Intergenic	-25627	NR_157263	112590798		NR_157263	ENSG00000280707	HPAT5	-	human pluripotency-associated transcript 5	ncRNA
23850	chr7	1045854	1046576	+	21	NA	intron (NM_001303473, intron 1 of 1)	intron (NM_001303473, intron 1 of 1)	1669	NM_001303473	115330		NM_138445	ENSG00000164849	GPR146	PGR8	G protein-coupled receptor 146	protein-coding
4898-2	chr13	79625635	79626308	+	21	NA	Intergenic	Intergenic	59244	NR_125772	103724388		NR_125772	ENSG00000227676	LINC01068	-	long intergenic non-protein coding RNA 1068	ncRNA
7460	chr1	84719827	84720769	+	21	NA	Intergenic	Intergenic	-29830	NM_001166295	117178		NM_014021	ENSG00000117155	SSX2IP	ADIP|hMsd1	SSX family member 2 interacting protein	protein-coding
22868	chr21	43344377	43344648	+	21	NA	Intergenic	Intergenic	-12473	NR_103713	100126693		NR_103713		LINC00322	C21orf136|NCRNA00322	long intergenic non-protein coding RNA 322	ncRNA
9415-2	chr4	142347851	142349200	+	21	NA	intron (NM_001385334, intron 6 of 24)	intron (NM_001385334, intron 6 of 24)	-42581	NM_001385459	8821		NM_003866	ENSG00000109452	INPP4B	-	inositol polyphosphate-4-phosphatase type II B	protein-coding
11322-2	chr14	105397879	105397968	+	21	NA	promoter-TSS (NM_001195082)	promoter-TSS (NM_001195082)	-615	NM_001195082	647310		NM_001195082	ENSG00000226174	TEX22	-	testis expressed 22	protein-coding
10827	chr7	28355604	28356947	+	21	NA	intron (NM_182899, intron 1 of 9)	intron (NM_182899, intron 1 of 9)	-56243	NM_182898	9586		NM_004904	ENSG00000146592	CREB5	CRE-BPA|CREB-5|CREBPA	cAMP responsive element binding protein 5	protein-coding
5429-3	chr4	152212138	152212817	+	21	NA	Intergenic	Intergenic	111659	NR_121627	100996286		NR_121627	ENSG00000245954	LINC02273	-	long intergenic non-protein coding RNA 2273	ncRNA
10345	chr8	9247769	9249376	+	21	NA	Intergenic	Intergenic	59573	NR_125431	101929128		NR_125431	ENSG00000248538	LOC101929128	-	uncharacterized LOC101929128	ncRNA
17489	chr8	144357263	144357819	+	21	NA	intron (NM_024555, intron 2 of 8).2	intron (NM_024555, intron 2 of 8).2	931	NM_012162	26233		NM_012162	ENSG00000182325	FBXL6	FBL6|FBL6A|PP14630	F-box and leucine rich repeat protein 6	protein-coding
53019	chr1	3137756	3138136	+	21	NA	intron (NM_199454, intron 1 of 16)	intron (NM_199454, intron 1 of 16)	9971	NR_036215	100422968		NR_036215	ENSG00000283572	MIR4251	-	microRNA 4251	ncRNA
7472-2	chr14	49692999	49693815	+	21	NA	intron (NM_172193, intron 1 of 12)	CpG	287	NM_172193	122773		NM_172193	ENSG00000197776	KLHDC1	MST025	kelch domain containing 1	protein-coding
13474	chr20	3471869	3471911	+	21	NA	intron (NM_139321, intron 1 of 28)	intron (NM_139321, intron 1 of 28)	872	NM_001207047	8455		NM_012070	ENSG00000088812	ATRN	DPPT-L|MGCA	attractin	protein-coding
4128	chr11	106156312	106156633	+	21	NA	Intergenic	MIRb|SINE|MIR	-24356	NR_135099	105369473		NR_135099	ENSG00000254580	LINC02719	-	long intergenic non-protein coding RNA 2719	ncRNA
10154	chr7	90900626	90901747	+	21	NA	intron (NM_012395, intron 6 of 13)	intron (NM_012395, intron 6 of 13)	191370	NM_001287137	5218		NM_012395	ENSG00000058091	CDK14	PFTAIRE1|PFTK1	cyclin dependent kinase 14	protein-coding
8624	chr10	65675214	65675961	+	21	NA	intron (NR_120647, intron 3 of 5)	LTR22E|LTR|ERVK	104162	NR_120647	101928913		NR_120647		LINC01515	-	long intergenic non-protein coding RNA 1515	ncRNA
7000	chr2	64106720	64106776	+	21	NA	intron (NM_020651, intron 2 of 6)	MIR3|SINE|MIR	37672	NM_020651	57162		NM_020651	ENSG00000197329	PELI1	-	pellino E3 ubiquitin protein ligase 1	protein-coding
5024-3	chr7	58434259	58434955	+	21	NA	Intergenic	ALR/Alpha|Satellite|centr	984430	NM_001159279	441234		NM_001159279	ENSG00000182111	ZNF716	-	zinc finger protein 716	protein-coding
5170	chr10	72687871	72688472	+	21	NA	Intergenic	Intergenic	-3960	NR_073062	90550		NM_138357	ENSG00000156026	MCU	C10orf42|CCDC109A|HsMCU	mitochondrial calcium uniporter	protein-coding
20703-2	chr6	167205129	167206090	+	21	NA	Intergenic	Intergenic	-22691	NR_157263	112590798		NR_157263	ENSG00000280707	HPAT5	-	human pluripotency-associated transcript 5	ncRNA
5951-3	chr22	39388377	39389072	+	21	NA	Intergenic	CpG	-11056	NM_006116	10454		NM_006116	ENSG00000100324	TAB1	3'-Tab1|MAP3K7IP1	TGF-beta activated kinase 1 (MAP3K7) binding protein 1	protein-coding
14028	chr19	18339810	18340325	+	21	NA	promoter-TSS (NM_001308366)	promoter-TSS (NM_001308366)	-531	NM_001329477	54858		NM_017712	ENSG00000130517	PGPEP1	PAP-I|PGI|PGP|PGP-I|PGPI|Pcp	pyroglutamyl-peptidase I	protein-coding
20653	chr12	100166572	100166762	+	21	NA	intron (NR_024261, intron 7 of 8)	intron (NR_024261, intron 7 of 8)	6676	NR_036632	55592		NM_017600	ENSG00000290571	GOLGA2P5	GOLGA2B|GOLGA2L1	GOLGA2 pseudogene 5	pseudo
6641	chr10	14571612	14572717	+	21	NA	promoter-TSS (NM_001320737)	promoter-TSS (NM_001320737)	25	NM_001320737	83641		NM_031453	ENSG00000065809	FAM107B	C10orf45|HITS	family with sequence similarity 107 member B	protein-coding
16180	chr1	18939633	18940143	+	21	NA	intron (NM_001136265, intron 1 of 8)	L3b|LINE|CR1	16788	NM_001136265	126917		NM_001136265	ENSG00000169991	IFFO2	-	intermediate filament family orphan 2	protein-coding
6508-6	chr3	99945413	99946254	+	21	NA	intron (NM_182909, intron 1 of 5)	intron (NM_182909, intron 1 of 5)	18565	NR_037486	100500859		NR_037486	ENSG00000264897	MIR3921	-	microRNA 3921	ncRNA
12864	chr9	135471332	135471340	+	21	NA	intron (NR_038969, intron 1 of 2)	AluSg|SINE|Alu	913	NR_038969	100506599		NR_038969	ENSG00000225361	PPP1R26-AS1	-	PPP1R26 antisense RNA 1	ncRNA
11920	chrX	108441125	108441416	+	21	NA	intron (NM_033380, intron 1 of 50)	intron (NM_033380, intron 1 of 50)	1432	NM_000495	1287		NM_000495	ENSG00000188153	COL4A5	ASLN|ATS|ATS1|CA54	collagen type IV alpha 5 chain	protein-coding
4707-2	chr11	18579079	18579545	+	21	NA	intron (NM_001261382, intron 1 of 10)	MIRb|SINE|MIR	206	NM_001261385	55293		NM_018314	ENSG00000151116	UEVLD	ATTP|UEV3	UEV and lactate/malate dehyrogenase domains	protein-coding
14355	chr14	68249790	68250221	+	21	NA	intron (NM_133509, intron 7 of 10)	intron (NM_133509, intron 7 of 10)	378782	NR_135816	100996664		NR_135816		LOC100996664	-	uncharacterized LOC100996664	ncRNA
8967	chr10	79070441	79070454	+	21	NA	intron (NM_020338, intron 1 of 24)	CpG-3064	1481	NM_020338	57178		NM_020338	ENSG00000108175	ZMIZ1	MIZ|NEDDFSA|RAI17|TRAFIP10|ZIMP10	zinc finger MIZ-type containing 1	protein-coding
9309	chr16	56355408	56355833	+	21	NA	intron (NM_020988, intron 8 of 8)	intron (NM_020988, intron 8 of 8)	69369	NM_001323511	267		NM_001144	ENSG00000159461	AMFR	GP78|RNF45|SPG89	autocrine motility factor receptor	protein-coding
21807	chr4	169068618	169068718	+	21	NA	Intergenic	Intergenic	-58413	NM_032783	84869		NM_032783	ENSG00000145439	CBR4	SDR45C1	carbonyl reductase 4	protein-coding
22092	chr5	113270832	113270891	+	21	NA	intron (NM_001085377, intron 3 of 18)	intron (NM_001085377, intron 3 of 18)	24077	NM_002387	4163		NM_002387	ENSG00000171444	MCC	MCC1	MCC regulator of WNT signaling pathway	protein-coding
12542	chr12	57242550	57243401	+	21	NA	TTS (NM_001286257)	TTS (NM_001286257)	-2283	NM_020142	56901		NM_020142	ENSG00000185633	NDUFA4L2	COXFA4L2|MISTRH|NUOMS	NDUFA4 mitochondrial complex associated like 2	protein-coding
26148	chr4	71597010	71597333	+	21	NA	Intergenic	MSTD|LTR|ERVL-MaLR	186908	NM_000583	2638		NM_000583	ENSG00000145321	GC	DBP|DBP-maf|DBP/GC|GRD3|Gc-MAF|GcMAF|HEL-S-51|VDB|VDBG|VDBP	GC vitamin D binding protein	protein-coding
17871	chr16	2737866	2738309	+	21	NA	intron (NR_027275, intron 4 of 5)	intron (NR_027275, intron 4 of 5)	6710	NR_027274	100128788		NR_027274	ENSG00000205913	SRRM2-AS1	-	SRRM2 antisense RNA 1	ncRNA
3757-2	chr16	58661314	58661690	+	21	NA	Intergenic	MIRb|SINE|MIR	22829	NM_001308384	55238		NM_018231	ENSG00000103042	SLC38A7	SNAT7	solute carrier family 38 member 7	protein-coding
10418	chr22	41844331	41844863	+	21	NA	intron (NR_103834, intron 1 of 21)	intron (NR_103834, intron 1 of 21)	-9932	NR_157279	112637020		NR_157279		SREBF2-AS1	821D11.7|RP5	SREBF2 antisense RNA 1	ncRNA
6009	chr10	87092703	87093635	+	20	NA	intron (NM_001318905, intron 1 of 15)	intron (NM_001318905, intron 1 of 15)	918	NM_001318901	2746		NM_005271	ENSG00000148672	GLUD1	GDH|GDH1|GLUD|hGDH1	glutamate dehydrogenase 1	protein-coding
13080	chrY	7273423	7275306	+	20	NA	non-coding (NR_028062, exon 1 of 8)	non-coding (NR_028062, exon 1 of 8)	392	NR_028062	5616		NM_002760	ENSG00000293442	PRKY	PRKXP3|PRKYP	protein kinase Y-linked (pseudogene)	pseudo
13282	chr1	234874388	234874913	+	20	NA	Intergenic	Intergenic	89349	NR_125945	101927851		NR_125945	ENSG00000238005	LNCATV	-	lncRNA negative regulator of antiviral signaling	ncRNA
5395	chr6	165500327	165500930	+	20	NA	intron (NM_001385079, intron 2 of 21)	LTR5_Hs|LTR|ERVK	161652	NM_006661	10846		NM_006661	ENSG00000112541	PDE10A	ADSD2|HSPDE10A|IOLOD|LINC00473|PDE10A19	phosphodiesterase 10A	protein-coding
6102-2	chr21	8402484	8403422	+	20	NA	TTS (NR_003287).3	TTS (NR_003287).3	6027	NR_146154	109910382		NR_146154		RNA28SN3	-	RNA, 28S ribosomal N3	rRNA
9277	chr12	54160911	54161108	+	20	NA	Intergenic	Intergenic	27948	NM_001351253	23583		NM_014311	ENSG00000123415	SMUG1	FDG|HMUDG|UNG3	single-strand-selective monofunctional uracil-DNA glycosylase 1	protein-coding
11469-2	chr7	111932056	111932469	+	20	NA	intron (NM_014705, intron 12 of 51)	intron (NM_014705, intron 12 of 51)	123757	NR_103806	100506413		NR_103806	ENSG00000225572	DOCK4-AS1	-	DOCK4 antisense RNA 1	ncRNA
18853	chr1	200030541	200031003	+	20	NA	intron (NM_003822, intron 1 of 6)	intron (NM_003822, intron 1 of 6)	3062	NM_003822	2494		NM_003822	ENSG00000116833	NR5A2	B1F|B1F2|CPF|FTF|FTZ-F1|FTZ-F1beta|LRH-1|LRH1|hB1F-2	nuclear receptor subfamily 5 group A member 2	protein-coding
21672	chr15	89165419	89168342	+	20	NA	intron (NM_152924, intron 5 of 10)	intron (NM_152924, intron 5 of 10)	54699	NM_000326	6017		NM_000326	ENSG00000140522	RLBP1	CRALBP	retinaldehyde binding protein 1	protein-coding
8804	chr12	11768183	11769221	+	20	NA	intron (NM_001987, intron 2 of 7)	intron (NM_001987, intron 2 of 7)	119028	NM_001987	2120		NM_001987	ENSG00000139083	ETV6	TEL|TEL/ABL|THC5	ETS variant transcription factor 6	protein-coding
7629-2	chr16	16074126	16074904	+	20	NA	intron (NM_004996, intron 14 of 30)	intron (NM_004996, intron 14 of 30)	124899	NM_004996	4363		NM_004996	ENSG00000103222	ABCC1	ABC29|ABCC|DFNA77|GS-X|MRP|MRP1	ATP binding cassette subfamily C member 1 (ABCC1 blood group)	protein-coding
13254	chr9	27527759	27527977	+	20	NA	intron (NM_024761, intron 1 of 3)	intron (NM_024761, intron 1 of 3)	1946	NM_024761	79817		NM_024761	ENSG00000120162	MOB3B	C9orf35|MOB1D|MOBKL2B	MOB kinase activator 3B	protein-coding
20578	chr19	39826733	39826900	+	20	NA	exon (NM_006483, exon 9 of 11).2	exon (NM_006483, exon 9 of 11).2	2986	NR_106777	102465974		NR_106777	ENSG00000277759	MIR6719	hsa-mir-6719	microRNA 6719	ncRNA
10797	chr5	92979331	92980382	+	20	NA	Intergenic	Intergenic	591487	NR_109825	441094		NR_015369	ENSG00000237187	NR2F1-AS1	-	NR2F1 antisense RNA 1	ncRNA
9792	chr8	6900487	6901796	+	20	NA	Intergenic	Intergenic	-23205	NM_005218	1672		NM_005218	ENSG00000164825	DEFB1	BD1|DEFB-1|DEFB101|HBD1	defensin beta 1	protein-coding
11763	chr6	36985582	36986031	+	20	NA	intron (NM_001271641, intron 1 of 11)	intron (NM_001271641, intron 1 of 11)	390	NM_001271641	23787		NM_014341	ENSG00000137409	MTCH1	CGI-64|PIG60|PSAP|SLC25A49	mitochondrial carrier 1	protein-coding
5652	chr3	144384270	144384828	+	20	NA	Intergenic	Intergenic	411468	NM_001134470	205428		NM_173552	ENSG00000181744	DIPK2A	C3orf58|DIA1|GoPro49|HASF	divergent protein kinase domain 2A	protein-coding
16200-2	chr6	35919926	35920639	+	20	NA	intron (NR_034069, intron 2 of 15)	intron (NR_034069, intron 2 of 15)	816	NM_003137	6732		NM_003137	ENSG00000096063	SRPK1	SFRSK1	SRSF protein kinase 1	protein-coding
11623	chr2	6076745	6078685	+	20	NA	Intergenic	Intergenic	95737	NR_026833	400940		NM_207479		LOC400940	-	uncharacterized LOC400940	ncRNA
8411-6	chr22	17121447	17122293	+	20	NA	promoter-TSS (NM_001163079)	promoter-TSS (NM_001163079)	275	NR_103793	100996342		NR_103793	ENSG00000235478	LINC01664	-	long intergenic non-protein coding RNA 1664	ncRNA
18291	chr10	102119431	102120128	+	20	NA	intron (NM_001321612, intron 1 of 10)	intron (NM_001321612, intron 1 of 10)	589	NM_001321612	8861		NM_003893	ENSG00000198728	LDB1	CLIM-2|CLIM2|LDB-1|NLI	LIM domain binding 1	protein-coding
24348	chr17	82098906	82099409	+	20	NA	promoter-TSS (NM_004104)	promoter-TSS (NM_004104)	-921	NM_004104	2194		NM_004104	ENSG00000169710	FASN	FAS|OA-519|SDR27X1	fatty acid synthase	protein-coding
13621	chr1	16748918	16749157	+	20	NA	Intergenic	CpG	8521	NR_004400	26863		NR_004400	ENSG00000206737	RNVU1-18	RNU1-25|RNU1-25P|RNU1-5|RNU1P1|RNU1P9|U1.15|U1P101|U1P15|vU1.18	RNA, variant U1 small nuclear 18	snRNA
3911-3	chr14_GL000225v1_random	140790	141376	+	20	NA	NA	BSR/Beta|Satellite|Satellite	NA	NA
5772	chr12	85568310	85568935	+	20	NA	Intergenic	Intergenic	267787	NM_005447	9182		NM_005447	ENSG00000198774	RASSF9	P-CIP1|PAMCI|PCIP1	Ras association domain family member 9	protein-coding
5604-3	chr4	113141790	113142581	+	20	NA	intron (NM_001354240, intron 1 of 44)	intron (NM_001354240, intron 1 of 44)	-10097	NR_107049	102465878		NR_107049	ENSG00000275810	MIR8082	hsa-mir-8082	microRNA 8082	ncRNA
13326	chr3	73569290	73570174	+	20	NA	promoter-TSS (NM_001303139)	promoter-TSS (NM_001303139)	-217	NM_001303139	23024		NM_015009	ENSG00000121440	PDZRN3	LNX3|SEMACAP3|SEMCAP3	PDZ domain containing ring finger 3	protein-coding
24361	chr8	67342054	67343044	+	20	NA	intron (NM_006421, intron 1 of 38)	intron (NM_006421, intron 1 of 38)	1232	NM_006421	10565		NM_006421	ENSG00000066777	ARFGEF1	ARFGEP1|BIG1|DEDISB|P200	ADP ribosylation factor guanine nucleotide exchange factor 1	protein-coding
8026	chr15	40469711	40469738	+	20	NA	Intergenic	Intergenic	-1260	NM_130468	113189		NM_130468	ENSG00000169105	CHST14	ATCS|D4ST1|EDSMC1|HNK1ST	carbohydrate sulfotransferase 14	protein-coding
14799	chr9	14865970	14867937	+	20	NA	intron (NR_163240, intron 2 of 7)	AluSz6|SINE|Alu	43475	NR_163241	158326		NM_144966	ENSG00000164946	FREM1	BNAR|C9orf143|C9orf145|C9orf154|MOTA|TILRR|TRIGNO2	FRAS1 related extracellular matrix 1	protein-coding
9536	chr1	218164327	218165026	+	20	NA	Intergenic	CpG	-120617	NM_016052	51018		NM_016052	ENSG00000067533	RRP15	CGI-115|KIAA0507	ribosomal RNA processing 15 homolog	protein-coding
7072	chr22	43010678	43011883	+	20	NA	intron (NM_001184970, intron 1 of 10)	intron (NM_001184970, intron 1 of 10)	3869	NM_001184970	11252		NM_007229	ENSG00000100266	PACSIN2	SDPII	protein kinase C and casein kinase substrate in neurons 2	protein-coding
7708	chr1	186762795	186763712	+	20	NA	Intergenic	Intergenic	-65696	NM_001311193	5321		NM_024420	ENSG00000116711	PLA2G4A	GURDP|PLA2G4|cPLA2|cPLA2-alpha	phospholipase A2 group IVA	protein-coding
5693	chr3	80696273	80696835	+	20	NA	Intergenic	Intergenic	-68343	NR_147144	105377175		NR_147143	ENSG00000242781	LINC02050	-	long intergenic non-protein coding RNA 2050	ncRNA
8391-2	chr2	164612968	164614185	+	20	NA	intron (NM_004490, intron 2 of 13)	intron (NM_004490, intron 2 of 13)	7906	NM_004490	2888		NM_004490	ENSG00000115290	GRB14	-	growth factor receptor bound protein 14	protein-coding
7712-2	chr2	170120212	170120437	+	20	NA	Intergenic	L1MC4|LINE|L1	-57823	NR_045683	140469		NM_138995	ENSG00000071909	MYO3B	-	myosin IIIB	protein-coding
21801	chr10	78746954	78747345	+	20	NA	Intergenic	L2a|LINE|L2	320299	NR_024429	283050		NR_015429	ENSG00000224596	ZMIZ1-AS1	-	ZMIZ1 antisense RNA 1	ncRNA
19824	chr11	64805073	64806142	+	20	NA	intron (NM_001370259, intron 8 of 9)	intron (NM_001370259, intron 8 of 9)	-2393	NM_001307990	5871		NM_004579	ENSG00000168067	MAP4K2	BL44|GCK|RAB8IP	mitogen-activated protein kinase kinase kinase kinase 2	protein-coding
5831-4	chr5	138472277	138473123	+	20	NA	Intergenic	Intergenic	7221	NM_001964	1958		NM_001964	ENSG00000120738	EGR1	AT225|G0S30|KROX-24|NGFI-A|TIS8|ZIF-268|ZNF225	early growth response 1	protein-coding
30774	chrUn_KI270744v1	107523	110716	+	20	NA	NA	ACRO1|Satellite|acro	NA	NA
11265	chr10	26314166	26315179	+	20	NA	Intergenic	Intergenic	97898	NM_001134366	2572		NM_000818	ENSG00000136750	GAD2	GAD65	glutamate decarboxylase 2	protein-coding
6383-3	chr9	112750147	112750751	+	20	NA	promoter-TSS (NM_001012994)	promoter-TSS (NM_001012994)	-311	NM_001012994	401548		NM_001012994	ENSG00000148158	SNX30	ATG24A	sorting nexin family member 30	protein-coding
10500	chr22	39364749	39364992	+	20	NA	intron (NM_145738, intron 1 of 3)	intron (NM_145738, intron 1 of 3)	700	NM_145738	9145		NM_004711	ENSG00000100321	SYNGR1	-	synaptogyrin 1	protein-coding
17429	chr8	122788542	122788546	+	20	NA	intron (NM_014943, intron 1 of 3)	AluJb|SINE|Alu	6889	NM_014943	22882		NM_014943	ENSG00000178764	ZHX2	AFR1|RAF	zinc fingers and homeoboxes 2	protein-coding
2215-5	chr16	19759	19901	+	20	NA	Intergenic	(ACCCTG)n|Simple_repeat|Simple_repeat	-2711	NR_107062	102465909		NR_107062	ENSG00000273874	MIR6859-2	hsa-mir-6859-2	microRNA 6859-2	ncRNA
7792	chr3	100089760	100091016	+	20	NA	intron (NM_182909, intron 1 of 5)	intron (NM_182909, intron 1 of 5)	24125	NM_182909	11259		NM_014890	ENSG00000168386	FILIP1L	DOC-1|DOC1|GIP130|GIP90	filamin A interacting protein 1 like	protein-coding
8655	chr10	80665836	80666704	+	20	NA	Intergenic	Intergenic	16473	NR_155749	105378386		NR_155749	ENSG00000231082	LINC02655	-	long intergenic non-protein coding RNA 2655	ncRNA
29968	chr19	48632488	48632741	+	20	NA	intron (NM_001352, intron 3 of 3)	intron (NM_001352, intron 3 of 3)	4765	NM_001352	1628		NM_001352	ENSG00000105516	DBP	DABP|taxREB302	D-box binding PAR bZIP transcription factor	protein-coding
28576	chr19	2044201	2044800	+	20	NA	intron (NM_199054, intron 5 of 13)	intron (NM_199054, intron 5 of 13)	6744	NM_199054	2872		NM_017572	ENSG00000099875	MKNK2	GPRK7|MNK2	MAPK interacting serine/threonine kinase 2	protein-coding
11675	chr1	26785719	26785741	+	20	NA	Intergenic	FLAM_C|SINE|Alu	-1324	NM_001374478	55650		NM_017837	ENSG00000060642	PIGV	GPI-MT-II|HPMRS1|PIG-V	phosphatidylinositol glycan anchor biosynthesis class V	protein-coding
8452	chr12	32889233	32890045	+	20	NA	intron (NM_004572, intron 1 of 13)	intron (NM_004572, intron 1 of 13)	7138	NM_001005242	5318		NM_004572	ENSG00000057294	PKP2	ARVD9	plakophilin 2	protein-coding
17096	chr4	163165275	163165819	+	20	NA	intron (NM_138386, intron 1 of 7)	L2|LINE|L2	1343	NM_138386	92345		NM_138386	ENSG00000145414	NAF1	PFBMFT7	nuclear assembly factor 1 ribonucleoprotein	protein-coding
15044-2	chr14_GL000225v1_random	82693	83524	+	20	NA	NA	BSR/Beta|Satellite|Satellite	NA	NA
4836-2	chr12	110042969	110043752	+	20	NA	intron (NM_207435, intron 4 of 4)	L2a|LINE|L2	5287	NR_148516
11680	chr11	22675843	22676293	+	20	NA	intron (NM_001351224, intron 2 of 8)	intron (NM_001351224, intron 2 of 8)	1294	NM_005256	2620		NM_005256	ENSG00000148935	GAS2	GAS-2	growth arrest specific 2	protein-coding
7256	chrX	21946944	21947764	+	20	NA	intron (NM_004595, intron 1 of 10)	MER5A|DNA|hAT-Charlie	6645	NM_004595	6611		NM_004595	ENSG00000102172	SMS	MRSR|MRXSSR|SPMSY|SRS|SpS	spermine synthase	protein-coding
14771	chr9	127734387	127735497	+	20	NA	intron (NM_001134430, intron 1 of 3)	intron (NM_001134430, intron 1 of 3)	352	NM_001134431	27433		NM_130459	ENSG00000160404	TOR2A	TORP1	torsin family 2 member A	protein-coding
22996	chr19	51692390	51692887	+	20	NA	promoter-TSS (NM_001316972)	promoter-TSS (NM_001316972)	26	NR_029843	407056		NR_029843	ENSG00000207550	MIR99B	MIRN99B|mir-99b	microRNA 99b	ncRNA
4837-4	chr3	150371734	150372442	+	20	NA	Intergenic	Intergenic	-36210	NM_001303264	9819		NM_014779	ENSG00000196428	TSC22D2	TILZ4a|TILZ4b|TILZ4c	TSC22 domain family member 2	protein-coding
12901	chr13	113123905	113124469	+	20	NA	intron (NM_000504, intron 1 of 7)	intron (NM_000504, intron 1 of 7)	1388	NM_000504	2159		NM_000504	ENSG00000126218	F10	FX|FXA	coagulation factor X	protein-coding
9142	chr13	59356004	59357298	+	20	NA	Intergenic	MLT1F2|LTR|ERVL-MaLR	-656067	NR_046539	100874195		NR_046539	ENSG00000227528	DIAPH3-AS1	-	DIAPH3 antisense RNA 1	ncRNA
3920-2	chr10	63267556	63268163	+	20	NA	intron (NM_001322258, intron 2 of 24)	intron (NM_001322258, intron 2 of 24)	1364	NR_134512	221037		NM_004241	ENSG00000171988	JMJD1C	KDM3C|TRIP-8|TRIP8	jumonji domain containing 1C	protein-coding
6390	chr11_KI270831v1_alt	288183	288902	+	20	NA	promoter-TSS (NM_001014437)	promoter-TSS (NM_001014437)	-87	NM_001378139	833		NM_001751	ENSG00000110619	CARS1	CARS|CYSRS|MCDDBH|MDBH|MGC:11246	cysteinyl-tRNA synthetase 1	protein-coding
41978	chr3	128409762	128410605	+	20	NA	Intergenic	Intergenic	-53411	NR_037890	285224		NR_037890	ENSG00000242049	DNAJB8-AS1	-	DNAJB8 antisense RNA 1	ncRNA
11157	chr2	85988695	85989388	+	20	NA	Intergenic	MER45C|DNA|hAT-Tip100	99761	NR_110569	101928113		NR_110569		ST3GAL5-AS1	-	ST3GAL5 antisense RNA 1 (head to head)	ncRNA
33163	chr3	39153752	39154012	+	20	NA	promoter-TSS (NM_033027)	promoter-TSS (NM_033027)	-291	NM_033027	64651		NM_033027	ENSG00000144655	CSRNP1	AXUD1|CSRNP-1|FAM130B|TAIP-3|URAX1	cysteine and serine rich nuclear protein 1	protein-coding
16922	chr11	1828536	1829006	+	20	NA	Intergenic	Intergenic	-5656	NM_001290334	90019		NM_138567	ENSG00000149043	SYT8	-	synaptotagmin 8	protein-coding
5606	chr4	19301115	19301915	+	20	NA	Intergenic	Intergenic	-950390	NM_001289135	9353		NM_004787	ENSG00000145147	SLIT2	SLIL3|Slit-2	slit guidance ligand 2	protein-coding
19074	chr1	16659289	16659602	+	20	NA	Intergenic	LTR4|LTR|ERV1	7503	NR_004427	26870		NR_004427	ENSG00000207005	RNU1-2	RNU1C1|RNU1C2|U1C1|U1C21	RNA, U1 small nuclear 2	snRNA
19824-2	chr11	64806518	64807214	+	20	NA	intron (NM_001370259, intron 6 of 9)	intron (NM_001370259, intron 6 of 9)	-3652	NM_001307990	5871		NM_004579	ENSG00000168067	MAP4K2	BL44|GCK|RAB8IP	mitogen-activated protein kinase kinase kinase kinase 2	protein-coding
5189-3	chr5	61292660	61293335	+	20	NA	Intergenic	MIR3|SINE|MIR	-28068	NR_146624	105378992		NR_146624	ENSG00000249279	LINC02057	-	long intergenic non-protein coding RNA 2057	ncRNA
24255	chr11	71285798	71285989	+	20	NA	Intergenic	L1MB3|LINE|L1	-33316	NM_012309	22941		NM_012309	ENSG00000162105	SHANK2	AUTS17|CORTBP1|CTTNBP1|ProSAP1|SHANK|SPANK-3	SH3 and multiple ankyrin repeat domains 2	protein-coding
16103	chr11	12689718	12689784	+	20	NA	intron (NM_021961, intron 2 of 12)	L1MC5|LINE|L1	15330	NM_021961	7003		NM_021961	ENSG00000187079	TEAD1	AA|NTEF-1|REF1|TCF-13|TCF13|TEAD-1|TEF-1	TEA domain transcription factor 1	protein-coding
16200	chr6	35919631	35919655	+	20	NA	intron (NR_034069, intron 2 of 15)	intron (NR_034069, intron 2 of 15)	1455	NM_003137	6732		NM_003137	ENSG00000096063	SRPK1	SFRSK1	SRSF protein kinase 1	protein-coding
7554-2	chr6	49556366	49557435	+	20	NA	intron (NR_146864, intron 4 of 4)	intron (NR_146864, intron 4 of 4)	6232	NR_146857	135398		NM_153344	ENSG00000197261	C6orf141	-	chromosome 6 open reading frame 141	protein-coding
5015	chr14	31937687	31938329	+	20	NA	Intergenic	Intergenic	-6845	NR_146544	105370439		NR_146544	ENSG00000258474	LINC02313	-	long intergenic non-protein coding RNA 2313	ncRNA
11678	chr17	14310036	14310449	+	20	NA	intron (NM_006041, intron 1 of 1)	intron (NM_006041, intron 1 of 1)	6502	NR_026880	84815		NM_032729	ENSG00000266709	MGC12916	-	uncharacterized protein MGC12916	ncRNA
14285	chr1	83691481	83691932	+	20	NA	intron (NR_119375, intron 2 of 2)	intron (NR_119375, intron 2 of 2)	168840	NR_119374	101927560		NR_119374	ENSG00000233008	LOC101927560	-	uncharacterized LOC101927560	ncRNA
8137	chr17	64256516	64256877	+	20	NA	intron (NM_001288732, intron 1 of 11)	L2b|LINE|L2	6564	NM_018469	55852		NM_018469	ENSG00000136478	TEX2	HT008|TMEM96	testis expressed 2	protein-coding
15044	chr14_GL000225v1_random	81000	81412	+	20	NA	NA	BSR/Beta|Satellite|Satellite	NA	NA
40305	chr21	44302205	44302883	+	20	NA	intron (NM_002626, intron 1 of 21)	intron (NM_002626, intron 1 of 21)	2491	NM_001002021	5211		NM_002626	ENSG00000141959	PFKL	ATP-PFK|PFK-B|PFK-L	phosphofructokinase, liver type	protein-coding
4194	chr1	143203154	143203769	+	20	NA	Intergenic	Intergenic	219131	NR_027354	645166		NR_027354	ENSG00000288905	LSP1P5	-	LSP1 pseudogene 5	pseudo
5396-3	chr6	21749587	21750113	+	20	NA	intron (NR_015410, intron 2 of 11)	intron (NR_015410, intron 2 of 11)	83437	NR_015410	401237		NR_015410		CASC15	CANT|LINC00340|lnc-SOX4-1	cancer susceptibility 15	ncRNA
13576	chrX	86012737	86014999	+	20	NA	intron (NM_001320959, intron 2 of 14)	L1MEd|LINE|L1	33438	NM_001362518	1121		NM_000390	ENSG00000188419	CHM	DXS540|GGTA|HSD-32|REP-1|TCD	CHM Rab escort protein	protein-coding
18065	chr1	201501920	201501956	+	20	NA	intron (NM_004078, intron 1 of 5)	AluSx1|SINE|Alu	4901	NM_001193571	1465		NM_004078	ENSG00000159176	CSRP1	CRP|CRP1|CSRP|CYRP|D1S181E|HEL-141|HEL-S-286	cysteine and glycine rich protein 1	protein-coding
6338	chr11	70913782	70914540	+	20	NA	intron (NM_012309, intron 10 of 25)	intron (NM_012309, intron 10 of 25)	-41793	NR_037437	100500844		NR_037437	ENSG00000263744	MIR3664	mir-3664	microRNA 3664	ncRNA
11680-2	chr11	22674141	22675638	+	20	NA	non-coding (NR_147085, exon 2 of 11)	non-coding (NR_147085, exon 2 of 11)	115	NM_005256	2620		NM_005256	ENSG00000148935	GAS2	GAS-2	growth arrest specific 2	protein-coding
12224	chr18	47109714	47111731	+	20	NA	intron (NM_032124, intron 6 of 6)	intron (NM_032124, intron 6 of 6)	39778	NM_001318765	84064		NM_032124	ENSG00000167220	HDHD2	3110052N05Rik|HEL-S-301	haloacid dehalogenase like hydrolase domain containing 2	protein-coding
30774-2	chrUn_KI270744v1	111184	112380	+	20	NA	NA	Intergenic	NA	NA
19744	chr7	101868155	101868502	+	20	NA	intron (NM_181552, intron 1 of 23)	intron (NM_181552, intron 1 of 23)	50702	NM_181552	1523		NM_001913	ENSG00000257923	CUX1	CASP|CDP|CDP/Cut|CDP1|COY1|CUTL1|CUX|Clox|Cux/CDP|GDDI|GOLIM6|Nbla10317|p100|p110|p200|p75	cut like homeobox 1	protein-coding
6181-2	chr15	62506194	62506787	+	19	NA	Intergenic	Intergenic	138691	NR_026897	197003		NM_152648	ENSG00000259458	MGC15885	-	uncharacterized protein MGC15885	ncRNA
6485	chr13	51451219	51451706	+	19	NA	intron (NM_001039938, intron 2 of 2)	intron (NM_001039938, intron 2 of 2)	1574	NM_001039938	26512		NM_012141	ENSG00000102786	INTS6	DBI-1|DDX26|DDX26A|DICE1|HDB|INT6|Notchl2	integrator complex subunit 6	protein-coding
7508	chr4	76301209	76301979	+	19	NA	intron (NM_001242939, intron 6 of 6)	intron (NM_001242939, intron 6 of 6)	-4432	NM_003943	8987		NM_003943	ENSG00000118804	STBD1	GENEX3414|GENX-3414	starch binding domain 1	protein-coding
10022	chr3	187567360	187568434	+	19	NA	Intergenic	Intergenic	102497	NM_001048	6750		NM_001048	ENSG00000157005	SST	SMST|SST1	somatostatin	protein-coding
14430	chr3	58046293	58046533	+	19	NA	intron (NM_001164319, intron 1 of 44)	L1MB7|LINE|L1	37991	NM_001164319	2317		NM_001457	ENSG00000136068	FLNB	ABP-278|ABP-280|AOI|FH1|FLN-B|FLN1L|LRS1|SCT|TABP|TAP	filamin B	protein-coding
6292	chr15	77999982	78000697	+	19	NA	intron (NM_144572, intron 12 of 12)	intron (NM_144572, intron 12 of 12)	-6114	NR_026998	91450		NR_026998		LOC91450	-	uncharacterized LOC91450	ncRNA
17135	chr15	58430584	58430802	+	19	NA	Intergenic	L2a|LINE|L2	-1298	NM_000236	3990		NM_000236	ENSG00000166035	LIPC	HDLCQ12|HL|HTGL|LIPH	lipase C, hepatic type	protein-coding
8389	chr12	121442162	121442170	+	19	NA	exon (NM_032590, exon 19 of 23)	exon (NM_032590, exon 19 of 23)	2186	NR_106957	102465665		NR_106957	ENSG00000284402	MIR7107	hsa-mir-7107	microRNA 7107	ncRNA
23263	chr3	112690258	112690530	+	19	NA	Intergenic	Intergenic	-46695	NR_162092	113218483		NR_162092		MIR9900	-	microRNA 9900	ncRNA
14476	chr18	3604224	3604475	+	19	NA	intron (NR_119377, intron 1 of 2)	intron (NR_119377, intron 1 of 2)	612	NR_119377	84777		NM_032691		DLGAP1-AS2	DLPAP1-AS2	DLGAP1 antisense RNA 2	ncRNA
14631	chr22	31248875	31249754	+	19	NA	intron (NM_001031801, intron 1 of 14)	intron (NM_001031801, intron 1 of 14)	930	NM_016733	3985		NM_005569	ENSG00000182541	LIMK2	-	LIM domain kinase 2	protein-coding
15225	chr3	123695931	123697210	+	19	NA	intron (NM_053027, intron 18 of 32)	intron (NM_053027, intron 18 of 32)	6926	NR_046629	100873940		NR_046629	ENSG00000250174	MYLK-AS2	-	MYLK antisense RNA 2	ncRNA
21997	chr13	112723385	112723805	+	19	NA	intron (NM_032189, intron 1 of 28)	MER49|LTR|ERV1	31136	NR_109811	100874205		NR_046661	ENSG00000232684	ATP11A-AS1	-	ATP11A antisense RNA 1	ncRNA
36525	chr7	985538	986281	+	19	NA	intron (NM_017781, intron 4 of 8)	intron (NM_017781, intron 4 of 8)	2728	NM_017781	54905		NM_017781	ENSG00000073067	CYP2W1	-	cytochrome P450 family 2 subfamily W member 1	protein-coding
10652	chr21	43866410	43867439	+	19	NA	intron (NM_001369878, intron 1 of 8)	intron (NM_001369878, intron 1 of 8)	1701	NM_020132	56894		NM_020132	ENSG00000160216	AGPAT3	1-AGPAT 3|LPAAT-GAMMA1|LPAAT3|LPLAT3	1-acylglycerol-3-phosphate O-acyltransferase 3	protein-coding
6390-3	chr6	114343399	114343713	+	19	NA	Intergenic	CpG	-280679	NM_153612	222537		NM_153612	ENSG00000249853	HS3ST5	3-OST-5|3OST5|HS3OST5|NBLA04021	heparan sulfate-glucosamine 3-sulfotransferase 5	protein-coding
4210-3	chr15_KI270905v1_alt	2105541	2105910	+	19	NA	promoter-TSS (NM_001355013).2	promoter-TSS (NM_001355013).2	-128	NM_001301026	7082		NM_003257	ENSG00000104067	TJP1	ZO-1	tight junction protein 1	protein-coding
15844-2	chr5	124696564	124697340	+	19	NA	intron (NM_001385621, intron 2 of 8)	MER5B|DNA|hAT-Charlie	49687	NM_001385620	57507		NM_020747	ENSG00000168916	ZNF608	NY-REN-36	zinc finger protein 608	protein-coding
34180	chr11	20009191	20010767	+	19	NA	intron (NM_145117, intron 11 of 37)	L2c|LINE|L2	-12577	NM_001111019	89797		NM_145117	ENSG00000166833	NAV2	HELAD1|POMFIL2|RAINB1|STEERIN2|UNC53H2	neuron navigator 2	protein-coding
21729	chr7	100566073	100566496	+	19	NA	3' UTR (NM_006076, exon 12 of 12)	3' UTR (NM_006076, exon 12 of 12)	7616	NM_001348677	100316904		NM_001168682	ENSG00000205307	SAP25	-	Sin3A associated protein 25	protein-coding
22239	chr11	67631953	67632184	+	19	NA	intron (NM_005995, intron 7 of 7)	L2c|LINE|L2	-2131	NM_181843	254552		NM_181843	ENSG00000167799	NUDT8	-	nudix hydrolase 8	protein-coding
9899	chr8	62138875	62140615	+	19	NA	Intergenic	L2|LINE|L2	-109109	NM_001304533	286183		NM_173688	ENSG00000185942	NKAIN3	FAM77D|NKAIN3-IT1|UG0898H09	sodium/potassium transporting ATPase interacting 3	protein-coding
6102	chr14	76913369	76914146	+	19	NA	Intergenic	Intergenic	-45881	NR_133913	105370578		NR_133913	ENSG00000258602	LINC01629	linc-KIAA1737-2	long intergenic non-protein coding RNA 1629	ncRNA
43973	chr19	42245957	42245986	+	19	NA	Intergenic	Intergenic	-3369	NM_019884	2931		NM_019884	ENSG00000105723	GSK3A	-	glycogen synthase kinase 3 alpha	protein-coding
24461	chr6	2850414	2851211	+	19	NA	Intergenic	Intergenic	3295	NR_039788	100616285		NR_039788	ENSG00000266750	MIR4645	mir-4645	microRNA 4645	ncRNA
7947	chr10	96664533	96666180	+	19	NA	intron (NM_152309, intron 2 of 16)	L4_C_Mam|LINE|RTE-X	55158	NM_152309	118788		NM_152309	ENSG00000155629	PIK3AP1	BCAP	phosphoinositide-3-kinase adaptor protein 1	protein-coding
6239	chr6	155272274	155273079	+	19	NA	intron (NM_001001346, intron 1 of 1)	intron (NM_001001346, intron 1 of 1)	8663	NM_001001346	49861		NM_001001346	ENSG00000171217	CLDN20	-	claudin 20	protein-coding
7043	chr22	40182682	40183645	+	19	NA	intron (NM_015088, intron 1 of 20)	MIRb|SINE|MIR	5238	NM_015088	23112		NM_015088	ENSG00000100354	TNRC6B	GDSBA	trinucleotide repeat containing adaptor 6B	protein-coding
15108-2	chr14	77009286	77010197	+	19	NA	Intergenic	MER45A|DNA|hAT-Tip100	18967	NM_024496	64207		NM_024496	ENSG00000119669	IRF2BPL	C14orf4|EAP1|NEDAMSS	interferon regulatory factor 2 binding protein like	protein-coding
12091	chr7	99373487	99373586	+	19	NA	Intergenic	AluSc|SINE|Alu	-1194	NM_005720	10095		NM_005720	ENSG00000130429	ARPC1B	ARC41|IMD71|PLTEID|p40-ARC|p41-ARC	actin related protein 2/3 complex subunit 1B	protein-coding
18346	chr2	14774203	14774689	+	19	NA	Intergenic	L2c|LINE|L2	141729	NM_001369364	151354		NM_145175	ENSG00000162981	LRATD1	FAM84A|NSE1|PP11517	LRAT domain containing 1	protein-coding
16045	chr19	37282027	37283045	+	19	NA	Intergenic	SST1|Satellite|centr	-13526	NR_029390	284412		NR_029390		LOC284412	-	Putative uncharacterized protein PP6455	ncRNA
3846-3	chr7	1504552	1504979	+	19	NA	promoter-TSS (NM_001080453)	promoter-TSS (NM_001080453)	-376	NM_001080453	26173		NM_001080453	ENSG00000164880	INTS1	INT1|NDCAGF|NET28	integrator complex subunit 1	protein-coding
6679	chr8	113147337	113148171	+	19	NA	intron (NM_198123, intron 4 of 70)	L2c|LINE|L2	229398	NM_198124	114788		NM_052900	ENSG00000164796	CSMD3	-	CUB and Sushi multiple domains 3	protein-coding
4970	chr4	38162255	38162852	+	19	NA	Intergenic	LTR78|LTR|ERV1	42599	NM_001253915	23216		NM_015173	ENSG00000065882	TBC1D1	TBC|TBC1	TBC1 domain family member 1	protein-coding
5202-4	chr8	85245420	85245972	+	19	NA	5' UTR (NM_198584, exon 1 of 7)	5' UTR (NM_198584, exon 1 of 7)	238	NM_198584	377677		NM_198584	ENSG00000185015	CA13	CAXIII	carbonic anhydrase 13	protein-coding
10833	chr9	136616576	136616771	+	19	NA	non-coding (NR_135288, exon 1 of 3)	non-coding (NR_135288, exon 1 of 3)	508	NR_135288	401561		NR_135288	ENSG00000279141	LINC01451	HCCAT4	long intergenic non-protein coding RNA 1451	ncRNA
4449-5	chr3	24598607	24599360	+	19	NA	Intergenic	Intergenic	-103275	NM_001374823	7068		NM_000461	ENSG00000151090	THRB	C-ERBA-2|C-ERBA-BETA|ERBA2|GRTH|NR1A2|PRTH|THR1|THRB1|THRB2|THRbeta|THRbeta1|TRb|TRbeta|TRbeta1|Thrbeta2	thyroid hormone receptor beta	protein-coding
7335	chr10	28677357	28678381	+	19	NA	5' UTR (NM_012342, exon 1 of 3)	5' UTR (NM_012342, exon 1 of 3)	348	NM_012342	25805		NM_012342	ENSG00000095739	BAMBI	NMA	BMP and activin membrane bound inhibitor	protein-coding
29217	chr9	69172778	69172914	+	19	NA	intron (NM_001369870, intron 2 of 23)	AluJo|SINE|Alu	-1209	NM_201629	9414		NM_004817	ENSG00000119139	TJP2	C9DUPq21.11|DFNA51|DUP9q21.11|FHCA1|PFIC4|X104|ZO2	tight junction protein 2	protein-coding
5059	chr9	82934750	82935293	+	19	NA	Intergenic	Intergenic	128121	NM_152573	158158		NM_152573	ENSG00000165105	RASEF	RAB45|TSG	RAS and EF-hand domain containing	protein-coding
3549-8	chr16	46397129	46397585	+	19	NA	Intergenic	Intergenic	171740	NR_026556	124149		NM_001004299		ANKRD26P1	-	ankyrin repeat domain 26 pseudogene 1	pseudo
9118	chr10	73591326	73593363	+	19	NA	intron (NM_001350995, intron 1 of 21)	intron (NM_001350995, intron 1 of 21)	-1002	NM_001378210	159195		NM_152586	ENSG00000166348	USP54	C10orf29|bA137L10.3|bA137L10.4	ubiquitin specific peptidase 54	protein-coding
3962	chr16_KI270853v1_alt	612994	613604	+	19	NA	promoter-TSS (NM_001270766)	promoter-TSS (NM_001270766)	-301	NM_001270766	123803		NM_173474	ENSG00000157045	NTAN1	PNAA|PNAD	N-terminal asparagine amidase	protein-coding
8154	chr9	27625962	27627141	+	19	NA	Intergenic	Intergenic	-52685	NM_001256054	203228		NM_018325	ENSG00000147894	C9orf72	ALSFTD|DENND9|DENNL72|FTDALS|FTDALS1	C9orf72-SMCR8 complex subunit	protein-coding
12703	chr2	8575675	8575706	+	19	NA	intron (NR_110257, intron 4 of 5)	intron (NR_110257, intron 4 of 5)	8102	NR_110257	101929567		NR_110257	ENSG00000236008	LINC01814	-	long intergenic non-protein coding RNA 1814	ncRNA
11476	chr9	128551550	128551558	+	19	NA	intron (NR_031672, intron 2 of 2).4	MIRb|SINE|MIR	-1033	NM_001375311	6709		NM_003127	ENSG00000197694	SPTAN1	DEE5|DEVEP|EIEE5|HMN11|HMND11|NEAS|SPG91|SPTA2	spectrin alpha, non-erythrocytic 1	protein-coding
14798	chr8	143616746	143618578	+	19	NA	promoter-TSS (NM_001317783)	promoter-TSS (NM_001317783)	-113	NM_001317783	7264		NM_003313	ENSG00000104522	GFUS	FX|P35B|SDR4E1|TSTA3	GDP-L-fucose synthase	protein-coding
6331-3	chr16	22195755	22196371	+	19	NA	Intergenic	Intergenic	-10215	NM_013302	29904		NM_013302	ENSG00000103319	EEF2K	CaMKIII|HSU93850|eEF-2K	eukaryotic elongation factor 2 kinase	protein-coding
43973-3	chr19	42251550	42252264	+	19	NA	intron (NM_001312656, intron 1 of 3)	intron (NM_001312656, intron 1 of 3)	1992	NM_001308402	2077		NM_006494	ENSG00000105722	ERF	CHYTS|CRS4|PE-2|PE2	ETS2 repressor factor	protein-coding
11201-2	chr6	19837886	19837909	+	19	NA	exon (NM_001546, exon 1 of 3)	exon (NM_001546, exon 1 of 3)	527	NM_001546	3400		NM_001546	ENSG00000172201	ID4	IDB4|bHLHb27	inhibitor of DNA binding 4	protein-coding
25909	chr10	89349526	89350178	+	19	NA	Intergenic	MER34A1|LTR|ERV1	17323	NM_001289759	3437		NM_001549	ENSG00000119917	IFIT3	CIG-49|GARG-49|IFI60|IFIT4|IRG2|ISG60|P60|RIG-G|cig41	interferon induced protein with tetratricopeptide repeats 3	protein-coding
20433	chr22	39524027	39524505	+	19	NA	Intergenic	Intergenic	3702	NM_182810	468		NM_001675	ENSG00000128272	ATF4	CREB-2|CREB2|TAXREB67|TXREB	activating transcription factor 4	protein-coding
7613	chr7	78486743	78487856	+	19	NA	intron (NM_012301, intron 6 of 21)	intron (NM_012301, intron 6 of 21)	140057	NR_003680	399670		NR_003680	ENSG00000293158	RPL13AP17	RPL13A_6_816	ribosomal protein L13a pseudogene 17	pseudo
10352	chr1	48085455	48085463	+	19	NA	Intergenic	MER30|DNA|hAT-Charlie	-88074	NM_001194986	388630		NM_001194986	ENSG00000269113	TRABD2B	TIKI2	TraB domain containing 2B	protein-coding
9400	chr3	42178286	42178840	+	19	NA	intron (NM_001042646, intron 3 of 15)	intron (NM_001042646, intron 3 of 15)	18370	NM_014965	22906		NM_014965	ENSG00000182606	TRAK1	DEE68|EIEE68|MILT1|OIP106	trafficking kinesin protein 1	protein-coding
8265	chr3	185282395	185283456	+	19	NA	promoter-TSS (NR_038322)	promoter-TSS (NR_038322)	-36	NR_038322	9175		NM_004721	ENSG00000073803	MAP3K13	LZK|MEKK13|MLK	mitogen-activated protein kinase kinase kinase 13	protein-coding
11715	chr1	244460516	244460525	+	19	NA	promoter-TSS (NM_001130957)	promoter-TSS (NM_001130957)	-753	NM_173807	257044		NM_173807	ENSG00000179397	CATSPERE	C10orf101|C1orf101	catsper channel auxiliary subunit epsilon	protein-coding
11168-2	chr8	113436603	113437232	+	19	NA	promoter-TSS (NM_001363185)	promoter-TSS (NM_001363185)	22	NM_001363185	114788		NM_052900	ENSG00000164796	CSMD3	-	CUB and Sushi multiple domains 3	protein-coding
12390	chr17	83053055	83053603	+	19	NA	Intergenic	Intergenic	-1519	NM_001009905	146712		NM_001009905	ENSG00000175711	B3GNTL1	3-Gn-T8|B3GNT8|BGnT-8|QTGAL|beta-1|beta3Gn-T8|beta3GnTL1	UDP-GlcNAc:betaGal beta-1,3-N-acetylglucosaminyltransferase like 1	protein-coding
9780	chr19	39498839	39499429	+	19	NA	intron (NM_016941, intron 1 of 7)	CpG	187	NM_203486	10683		NM_016941	ENSG00000090932	DLL3	SCDO1	delta like canonical Notch ligand 3	protein-coding
7987-4	chr2	218896471	218897290	+	19	NA	Intergenic	Intergenic	16028	NM_025216	80326		NM_025216	ENSG00000135925	WNT10A	ECTD16|OODD|SSPS|STHAG4	Wnt family member 10A	protein-coding
13463	chr9	124854205	124854618	+	19	NA	intron (NM_001276376, intron 2 of 7)	intron (NM_001276376, intron 2 of 7)	951	NM_001045476	401551		NM_001045476	ENSG00000136918	WDR38	-	WD repeat domain 38	protein-coding
17701	chr12	132562063	132563394	+	19	NA	intron (NM_001382740, intron 5 of 11)	intron (NM_001382740, intron 5 of 11)	-19269	NR_106821	102465975		NR_106821	ENSG00000277052	MIR6763	hsa-mir-6763	microRNA 6763	ncRNA
8965	chr4	73344018	73344725	+	19	NA	Intergenic	L1M5|LINE|L1	-59916	NM_000477	213		NM_000477	ENSG00000163631	ALB	FDAHT|HSA|PRO0883|PRO0903|PRO1341	albumin	protein-coding
6064-2	chr20	35048680	35049299	+	19	NA	intron (NM_199368, intron 6 of 18)	intron (NM_199368, intron 6 of 18)	43818	NM_015638	26133		NM_015638	ENSG00000100991	TRPC4AP	C20orf188|PPP1R158|TRRP4AP|TRUSS	transient receptor potential cation channel subfamily C member 4 associated protein	protein-coding
7659	chr21	15730390	15731490	+	19	NA	intron (NM_001352560, intron 1 of 23)	intron (NM_001352560, intron 1 of 23)	958	NM_001352561	29761		NM_013396	ENSG00000155313	USP25	USP21	ubiquitin specific peptidase 25	protein-coding
13142	chr7	74280222	74281518	+	19	NA	Intergenic	AluJr|SINE|Alu	-8537	NM_003388	7461		NM_003388	ENSG00000106665	CLIP2	CLIP|CLIP-115|CYLN2|WBSCR3|WBSCR4|WSCR3|WSCR4	CAP-Gly domain containing linker protein 2	protein-coding
22366	chr22	37817399	37818358	+	19	NA	TTS (NM_014291)	TTS (NM_014291)	-5504	NM_003614	8484		NM_003614	ENSG00000128310	GALR3	-	galanin receptor 3	protein-coding
7325	chr16	69923663	69924562	+	19	NA	promoter-TSS (NM_199424)	promoter-TSS (NM_199424)	-927	NM_199424	11060		NM_007014	ENSG00000198373	WWP2	AIP2|WWp2-like	WW domain containing E3 ubiquitin protein ligase 2	protein-coding
10775	chr6	117481951	117482677	+	19	NA	promoter-TSS (NM_001366459)	promoter-TSS (NM_001366459)	-290	NM_173674	285761		NM_173674	ENSG00000164465	DCBLD1	dJ94G16.1	discoidin, CUB and LCCL domain containing 1	protein-coding
5758	chr17	81912136	81912504	+	19	NA	promoter-TSS (NM_001330518)	promoter-TSS (NM_001330518)	-921	NM_001256435	5833		NM_002861	ENSG00000185813	PCYT2	ET|SPG82	phosphate cytidylyltransferase 2, ethanolamine	protein-coding
2776-5	chr5	1867228	1867721	+	19	NA	Intergenic	Intergenic	-10906	NR_104602	101929034		NR_104602	ENSG00000250417	LINC02116	-	long intergenic non-protein coding RNA 2116	ncRNA
4278-2	chr20	63642015	63642487	+	19	NA	exon (NM_015894, exon 4 of 5)	exon (NM_015894, exon 4 of 5)	10515	NM_001276310	50861		NM_015894	ENSG00000197457	STMN3	SCLIP	stathmin 3	protein-coding
19842	chr10	78781514	78781961	+	19	NA	Intergenic	Intergenic	285711	NR_024429	283050		NR_015429	ENSG00000224596	ZMIZ1-AS1	-	ZMIZ1 antisense RNA 1	ncRNA
9329	chr11	46277640	46277917	+	19	NA	5' UTR (NM_052854, exon 1 of 12)	5' UTR (NM_052854, exon 1 of 12)	116	NM_052854	90993		NM_052854	ENSG00000157613	CREB3L1	C16DELp11.2|DEL16p11.2|OASIS|OI16	cAMP responsive element binding protein 3 like 1	protein-coding
39045	chr1	21934950	21935022	+	19	NA	intron (NM_001291860, intron 1 of 96)	AluSg|SINE|Alu	2324	NM_001291860	3339		NM_005529	ENSG00000142798	HSPG2	HSPG|PLC|PRCAN|SJA|SJS|SJS1	heparan sulfate proteoglycan 2	protein-coding
4671	chr13	26558020	26558652	+	19	NA	intron (NM_006646, intron 1 of 9)	CpG	633	NM_001291965	10810		NM_006646	ENSG00000132970	WASF3	Brush-1|SCAR3|WAVE3	WASP family member 3	protein-coding
7094	chr7	101362008	101363211	+	19	NA	promoter-TSS (NM_001278563)	promoter-TSS (NM_001278563)	-211	NM_133457	136227		NM_133457	ENSG00000160963	COL26A1	EMI6|EMID2|EMU2|SH2B	collagen type XXVI alpha 1 chain	protein-coding
19965	chr8	11712381	11712829	+	19	NA	intron (NM_002052, intron 2 of 6)	AluJb|SINE|Alu	7243	NR_132779	106635531		NR_132779		SNORA99	-	small nucleolar RNA, H/ACA box 99	snoRNA
9429	chr1	229342709	229343552	+	19	NA	promoter-TSS (NM_145257)	promoter-TSS (NM_145257)	-83	NM_145257	126731		NM_145257	ENSG00000154429	CCSAP	C1orf96|CSAP	centriole, cilia and spindle associated protein	protein-coding
11168	chr8	113434719	113435397	+	19	NA	intron (NM_198123, intron 1 of 70)	intron (NM_198123, intron 1 of 70)	1881	NM_001363185	114788		NM_052900	ENSG00000164796	CSMD3	-	CUB and Sushi multiple domains 3	protein-coding
6271	chr7	29956030	29956637	+	19	NA	intron (NM_001145515, intron 1 of 6)	intron (NM_001145515, intron 1 of 6)	33468	NM_001145515	9805		NM_014766	ENSG00000136193	SCRN1	SES1	secernin 1	protein-coding
6493	chr17	19431528	19432400	+	19	NA	Intergenic	LTR34|LTR|ERV1	20732	NM_007148	7732		NM_007148	ENSG00000128482	RNF112	BFP|ZNF179	ring finger protein 112	protein-coding
5471-4	chr22	50475050	50475555	+	19	NA	promoter-TSS (NM_001365819)	promoter-TSS (NM_001365819)	-267	NM_001365819	6305		NM_002972	ENSG00000100241	SBF1	CMT4B3|DENND7A|MTMR5	SET binding factor 1	protein-coding
19395	chr1	206955976	206956293	+	19	NA	Intergenic	MER58A|DNA|hAT-Charlie	-9668	NM_002644	5284		NM_002644	ENSG00000162896	PIGR	-	polymeric immunoglobulin receptor	protein-coding
10066	chr22	42581342	42582628	+	19	NA	promoter-TSS (NR_002184)	promoter-TSS (NR_002184)	26	NR_002184	91695		NM_170698	ENSG00000291035	RRP7BP	RRP7B|dJ222E13.2	ribosomal RNA processing 7 homolog B, pseudogene	pseudo
10833-2	chr9	136617497	136618442	+	19	NA	promoter-TSS (NR_135288)	promoter-TSS (NR_135288)	-788	NR_135288	401561		NR_135288	ENSG00000279141	LINC01451	HCCAT4	long intergenic non-protein coding RNA 1451	ncRNA
13873	chr20	23658231	23660297	+	19	NA	Intergenic	PABL_B|LTR|ERV1	-21309	NM_001288614	1471		NM_000099	ENSG00000101439	CST3	ARMD11|HEL-S-2	cystatin C	protein-coding
13957	chr16	78057329	78059097	+	19	NA	Intergenic	Intergenic	35665	NM_005752	10143		NM_005752	ENSG00000166509	CLEC3A	CLECSF1	C-type lectin domain family 3 member A	protein-coding
3834-5	chr5	14976832	14977584	+	19	NA	Intergenic	Intergenic	-105430	NM_054027	56172		NM_054027	ENSG00000154122	ANKH	ANK|CCAL2|CMDJ|CPPDD|HANK|MANK|SLC62A1	ANKH inorganic pyrophosphate transport regulator	protein-coding
14883-2	chr4	69825166	69825313	+	19	NA	Intergenic	LTR12_|LTR|ERV1	34906	NM_005420	6783		NM_005420	ENSG00000109193	SULT1E1	EST|EST-1|ST1E1|STE	sulfotransferase family 1E member 1	protein-coding
6923	chr14	75063469	75064258	+	19	NA	intron (NM_001302617, intron 1 of 2)	intron (NM_001302617, intron 1 of 2)	161	NR_126395	97		NM_001107	ENSG00000119640	ACYP1	ACYPE	acylphosphatase 1	protein-coding
4469	chr3	160784669	160785198	+	19	NA	intron (NM_139245, intron 1 of 3)	intron (NM_139245, intron 1 of 3)	28702	NM_139245	151742		NM_139245	ENSG00000163590	PPM1L	PP2C-epsilon|PP2CE|PPM1-LIKE	protein phosphatase, Mg2+/Mn2+ dependent 1L	protein-coding
5799	chr3	64640105	64640922	+	19	NA	intron (NM_182920, intron 12 of 39)	intron (NM_182920, intron 12 of 39)	-44357	NR_038264	100507098		NR_038264	ENSG00000241684	ADAMTS9-AS2	-	ADAMTS9 antisense RNA 2	ncRNA
5205-3	chr4	101114716	101115458	+	19	NA	intron (NM_001130692, intron 2 of 11)	intron (NM_001130692, intron 2 of 11)	125785	NR_107033	102465868		NR_107033	ENSG00000273882	MIR8066	hsa-mir-8066	microRNA 8066	ncRNA
11161	chr15	90931484	90931492	+	19	NA	3' UTR (NM_198527, exon 4 of 4)	3' UTR (NM_198527, exon 4 of 4)	1061	NR_104447	374659		NM_198527	ENSG00000184508	HDDC3	(ppGpp)ase|MESH1|MYNRL15	HD domain containing 3	protein-coding
20251	chr12	121582073	121584316	+	19	NA	Intergenic	Intergenic	-2171	NM_032590	84678		NM_032590	ENSG00000089094	KDM2B	CXXC2|FBXL10|Fbl10|JHDM1B|PCCX2	lysine demethylase 2B	protein-coding
7987-3	chr2	218895918	218896078	+	19	NA	Intergenic	Intergenic	15146	NM_025216	80326		NM_025216	ENSG00000135925	WNT10A	ECTD16|OODD|SSPS|STHAG4	Wnt family member 10A	protein-coding
12842	chr1	246220633	246221401	+	19	NA	intron (NM_001375963, intron 5 of 11)	MER52A|LTR|ERV1	134523	NM_001375963	64754		NM_022743	ENSG00000185420	SMYD3	KMT3E|ZMYND1|ZNFN3A1|bA74P14.1	SET and MYND domain containing 3	protein-coding
27001	chr20	62956766	62957431	+	19	NA	intron (NM_022082, intron 2 of 12)	intron (NM_022082, intron 2 of 12)	4389	NM_022082	63910		NM_022082	ENSG00000101194	SLC17A9	C20orf59|POROK8|VNUT	solute carrier family 17 member 9	protein-coding
12206	chr18	44888123	44888621	+	19	NA	intron (NM_001379141, intron 3 of 5)	intron (NM_001379141, intron 3 of 5)	81794	NR_036203	100422829		NR_036203	ENSG00000265957	MIR4319	-	microRNA 4319	ncRNA
22851	chr11	48102630	48102680	+	19	NA	intron (NM_002843, intron 1 of 24)	AluSq|SINE|Alu	5873	NR_036119	100423000		NR_036119	ENSG00000263693	MIR3161	-	microRNA 3161	ncRNA
43973-2	chr19	42247487	42248234	+	19	NA	3' UTR (NM_006494, exon 4 of 4)	3' UTR (NM_006494, exon 4 of 4)	-5258	NM_019884	2931		NM_019884	ENSG00000105723	GSK3A	-	glycogen synthase kinase 3 alpha	protein-coding
18346-2	chr2	14775007	14775747	+	19	NA	Intergenic	Charlie22a|DNA|hAT-Charlie	142660	NM_001369364	151354		NM_145175	ENSG00000162981	LRATD1	FAM84A|NSE1|PP11517	LRAT domain containing 1	protein-coding
15108	chr14	77006799	77006828	+	19	NA	Intergenic	MIR|SINE|MIR	21895	NM_024496	64207		NM_024496	ENSG00000119669	IRF2BPL	C14orf4|EAP1|NEDAMSS	interferon regulatory factor 2 binding protein like	protein-coding
10832	chr20	8326800	8327213	+	19	NA	intron (NM_015192, intron 2 of 31)	AluJb|SINE|Alu	78302	NR_046809	100874337		NR_046809	ENSG00000225479	PLCB1-IT1	-	PLCB1 intronic transcript 1	ncRNA
7635	chr5	149151649	149153153	+	19	NA	intron (NM_001370417, intron 1 of 21)	intron (NM_001370417, intron 1 of 21)	10670	NM_001345861	22885		NM_014945	ENSG00000173210	ABLIM3	HMFN1661	actin binding LIM protein family member 3	protein-coding
22366-2	chr22	37818521	37819016	+	19	NA	Intergenic	CpG	-4614	NM_003614	8484		NM_003614	ENSG00000128310	GALR3	-	galanin receptor 3	protein-coding
12878	chr3	119206173	119207259	+	19	NA	Intergenic	Intergenic	-19770	NR_046574	100874201		NR_046574	ENSG00000240254	B4GALT4-AS1	-	B4GALT4 antisense RNA 1	ncRNA
6887-4	chr9	125467436	125468186	+	19	NA	intron (NM_024117, intron 9 of 10)	intron (NM_024117, intron 9 of 10)	205985	NM_001330778	26130		NM_015635	ENSG00000165219	GAPVD1	GAPEX5|GAPex-5|RAP6	GTPase activating protein and VPS9 domains 1	protein-coding
11558	chr17	50209243	50210594	+	18	NA	Intergenic	Intergenic	-4776	NR_110806	101927230		NR_110806		TILAM	LINC01969	TGF-beta induced lncRNA activating myofibroblasts	ncRNA
6127	chr5	131671614	131672601	+	18	NA	exon (NM_001346114, exon 13 of 17)	exon (NM_001346114, exon 13 of 17)	-36878	NM_001164386	51735		NM_016340	ENSG00000158987	RAPGEF6	KIA001LB|PDZ-GEF2|PDZGEF2|RA-GEF-2|RAGEF2	Rap guanine nucleotide exchange factor 6	protein-coding
16255	chr15	41945150	41946240	+	18	NA	intron (NM_139265, intron 2 of 5)	intron (NM_139265, intron 2 of 5)	24278	NR_120332	101928363		NR_120332	ENSG00000259883	EHD4-AS1	-	EHD4 antisense RNA 1	ncRNA
6439-3	chr22	20456445	20457109	+	18	NA	intron (NR_033825, intron 4 of 5)	intron (NR_033825, intron 4 of 5)	-18952	NM_182895	91179		NM_153334	ENSG00000244486	SCARF2	NSR1|SREC-II|SREC2|SRECRP-1|VDEGS	scavenger receptor class F member 2	protein-coding
11820	chr2	5730032	5730824	+	18	NA	Intergenic	Intergenic	38044	NM_003108	6664		NM_003108	ENSG00000176887	SOX11	CSS9|IDDMOH|MRD27	SRY-box transcription factor 11	protein-coding
12108	chr16	75110129	75110391	+	18	NA	3' UTR (NM_032268, exon 5 of 5)	3' UTR (NM_032268, exon 5 of 5)	6512	NM_153486	197257		NM_153486	ENSG00000166816	LDHD	DLACD|DLD	lactate dehydrogenase D	protein-coding
10318	chr22	36460149	36460309	+	18	NA	Intergenic	AluSx1|SINE|Alu	21411	NM_012473	25828		NM_012473	ENSG00000100348	TXN2	COXPD29|MT-TRX|MTRX|TRX2|TXN	thioredoxin 2	protein-coding
20299	chr2	219554258	219554759	+	18	NA	TTS (NM_001173431)	TTS (NM_001173431)	-5361	NR_036082	100423039		NR_036082	ENSG00000265252	MIR3132	-	microRNA 3132	ncRNA
17499	chr17	7442327	7442912	+	18	NA	exon (NM_001303460, exon 4 of 5)	exon (NM_001303460, exon 4 of 5)	1851	NM_001303460	2256		NM_004112	ENSG00000161958	FGF11	FGF-11|FHF-3|FHF3	fibroblast growth factor 11	protein-coding
11826	chr19	2164615	2164969	+	18	NA	intron (NM_032482, intron 1 of 27)	CpG	859	NM_032482	84444		NM_032482	ENSG00000104885	DOT1L	DOT1|KMT4	DOT1 like histone lysine methyltransferase	protein-coding
8891	chr9	137617985	137618898	+	18	NA	promoter-TSS (NM_001354263)	promoter-TSS (NM_001354263)	88	NR_122036	85026		NM_032937	ENSG00000203993	ARRDC1-AS1	C9orf37	ARRDC1 antisense RNA 1	ncRNA
5461	chr5	83476044	83476856	+	18	NA	intron (NM_001164097, intron 1 of 13)	intron (NM_001164097, intron 1 of 13)	4706	NM_004385	1462		NM_004385	ENSG00000038427	VCAN	CSPG2|ERVR|GHAP|PG-M|WGN|WGN1	versican	protein-coding
19292	chr4	2798248	2798878	+	18	NA	intron (NM_001122681, intron 1 of 12)	intron (NM_001122681, intron 1 of 12)	5478	NM_001122681	6452		NM_003023	ENSG00000087266	SH3BP2	3BP-2|3BP2|CRBM|CRPM|RES4-23	SH3 domain binding protein 2	protein-coding
5537-2	chr12	42758637	42758691	+	18	NA	Intergenic	Intergenic	66448	NR_135028	105369739		NR_135028	ENSG00000257114	LINC02450	-	long intergenic non-protein coding RNA 2450	ncRNA
7284	chr20	57350967	57351701	+	18	NA	promoter-TSS (NM_001015885)	promoter-TSS (NM_001015885)	79	NM_003610	8480		NM_003610	ENSG00000101146	RAE1	Gle2|MIG14|MRNP41|Mnrp41|dJ481F12.3|dJ800J21.1	ribonucleic acid export 1	protein-coding
24131-2	chr19	38840822	38841277	+	18	NA	intron (NM_001533, intron 6 of 12)	intron (NM_001533, intron 6 of 12)	8937	NM_001385651	3191		NM_001533	ENSG00000104824	HNRNPL	HNRPL|P/OKcl.14|hnRNP-L	heterogeneous nuclear ribonucleoprotein L	protein-coding
17742	chr12	42549798	42551954	+	18	NA	intron (NM_153026, intron 1 of 7)	intron (NM_153026, intron 1 of 7)	38870	NM_153026	144165		NM_153026	ENSG00000139174	PRICKLE1	EPM1B|RILP	prickle planar cell polarity protein 1	protein-coding
4920	chr19	33100737	33101544	+	18	NA	intron (NR_135270, intron 8 of 20)	intron (NR_135270, intron 8 of 20)	19959	NM_018025	55094		NM_018025	ENSG00000076650	GPATCH1	ECGP|GPATC1	G-patch domain containing 1	protein-coding
19292-2	chr4	2801737	2801774	+	18	NA	intron (NM_001122681, intron 1 of 12)	intron (NM_001122681, intron 1 of 12)	8670	NM_001122681	6452		NM_003023	ENSG00000087266	SH3BP2	3BP-2|3BP2|CRBM|CRPM|RES4-23	SH3 domain binding protein 2	protein-coding
2732	chr1	78004572	78005019	+	18	NA	promoter-TSS (NM_007034)	promoter-TSS (NM_007034)	-33	NM_001317103	11080		NM_007034	ENSG00000162616	DNAJB4	CMYP21|DNAJW|DjB4|HLJ1	DnaJ heat shock protein family (Hsp40) member B4	protein-coding
12765	chr4	184385295	184386005	+	18	NA	Intergenic	Intergenic	-3344	NR_125934	102723766		NR_125933		LINC02362	-	long intergenic non-protein coding RNA 2362	ncRNA
4932-2	chr10	82163893	82164839	+	18	NA	intron (NR_163251, intron 2 of 9)	L1MA4A|LINE|L1	68554	NR_120666	101929590		NR_120666	ENSG00000225738	NRG3-AS1	C10orf100|Em:AC010157.1	NRG3 antisense RNA 1	ncRNA
8555	chr3	52501960	52502116	+	18	NA	exon (NM_015136, exon 4 of 69)	exon (NM_015136, exon 4 of 69)	6700	NM_015136	23166		NM_015136	ENSG00000010327	STAB1	CLEVER-1|FEEL-1|FEEL1|FELE-1|FEX1|HRFT|SCARH2|STAB-1	stabilin 1	protein-coding
8567	chr3	58166921	58167979	+	18	NA	intron (NR_135534, intron 1 of 1)	intron (NR_135534, intron 1 of 1)	3185	NR_135534	105377105		NR_135534	ENSG00000244161	FLNB-AS1	-	FLNB antisense RNA 1	ncRNA
14211	chr14	103185941	103187830	+	18	NA	TTS (NR_033938)	TTS (NR_033938)	2143	NR_033938	100131366		NR_033938	ENSG00000251533	LINC00605	-	long intergenic non-protein coding RNA 605	ncRNA
4564-2	chr15	37109457	37109943	+	18	NA	Intergenic	Intergenic	-8389	NM_001220482	4212		NM_002399	ENSG00000134138	MEIS2	CPCMR|HsT18361|MRG1	Meis homeobox 2	protein-coding
9418	chr17	47821327	47822815	+	18	NA	promoter-TSS (NM_145798)	promoter-TSS (NM_145798)	-277	NM_145798	114881		NM_017731	ENSG00000006025	OSBPL7	ORP7	oxysterol binding protein like 7	protein-coding
12935	chr11	67422867	67423194	+	18	NA	intron (NM_001166222, intron 9 of 9)	intron (NM_001166222, intron 9 of 9)	-5464	NM_003952	6199		NM_003952	ENSG00000175634	RPS6KB2	KLS|P70-beta|P70-beta-1|P70-beta-2|S6K-beta2|S6K2|S6KB|S6KI(2)|S6Kbeta|SRK|STK14B|p70(S6K)-beta|p70S6Kb	ribosomal protein S6 kinase B2	protein-coding
4698	chr3	32185981	32186828	+	18	NA	Intergenic	Intergenic	-52275	NM_001320308	152189		NM_178868	ENSG00000170293	CMTM8	CKLFSF8|CKLFSF8-V2	CKLF like MARVEL transmembrane domain containing 8	protein-coding
16150	chr1	180166910	180167195	+	18	NA	intron (NM_001004128, intron 2 of 12)	AmnSINE1|SINE|5S-Deu-L2	12183	NM_002826	5768		NM_002826	ENSG00000116260	QSOX1	Q6|QSCN6	quiescin sulfhydryl oxidase 1	protein-coding
5612-3	chr4	41340228	41340858	+	18	NA	Intergenic	Intergenic	-19064	NM_001289124	22998		NM_014988	ENSG00000064042	LIMCH1	LIMCH1A|LMO7B	LIM and calponin homology domains 1	protein-coding
7234	chr10	121158097	121159937	+	18	NA	Intergenic	Intergenic	307655	NM_018117	55717		NM_018117	ENSG00000120008	WDR11	BRWD2|DR11|HH14|SRI1|WDR15	WD repeat domain 11	protein-coding
7241-2	chr9	98786560	98787311	+	18	NA	intron (NM_173551, intron 2 of 14)	MIR3|SINE|MIR	9620	NM_173551	203286		NM_173551	ENSG00000165138	ANKS6	ANKRD14|NPHP16|PKDR1|SAMD6	ankyrin repeat and sterile alpha motif domain containing 6	protein-coding
7608	chr5	83035476	83036279	+	18	NA	Intergenic	Intergenic	28460	NR_003139	677765		NR_003139	ENSG00000238835	SCARNA18	SCARNA18A|U109	small Cajal body-specific RNA 18	ncRNA
5053-3	chr9	129852458	129853016	+	18	NA	intron (NM_001110303, intron 3 of 25)	intron (NM_001110303, intron 3 of 25)	-16868	NR_106914	102466750		NR_106914	ENSG00000276124	MIR6855	hsa-mir-6855	microRNA 6855	ncRNA
10859	chr13	98446803	98446845	+	18	NA	3' UTR (NM_001032296, exon 11 of 11)	3' UTR (NM_001032296, exon 11 of 11)	75301	NM_003576	8428		NM_003576	ENSG00000102572	STK24	HEL-S-95|MST3|MST3B|STE20|STK3	serine/threonine kinase 24	protein-coding
9117	chr1	176058190	176059269	+	18	NA	intron (NM_022457, intron 11 of 19)	SVA_A|Retroposon|SVA	-90189	NR_002998	677679		NR_002998	ENSG00000252906	SCARNA3	HBI-100	small Cajal body-specific RNA 3	ncRNA
8874	chr10	11698526	11700196	+	18	NA	Intergenic	Intergenic	-43021	NM_024693	79746		NM_024693	ENSG00000134463	ECHDC3	-	enoyl-CoA hydratase domain containing 3	protein-coding
6501-2	chr3	66073431	66074452	+	18	NA	Intergenic	Intergenic	-35023	NM_001033057	9223		NM_004742	ENSG00000151276	MAGI1	AIP-3|AIP3|BAIAP1|BAP-1|BAP1|MAGI-1|MAGI-1b|Magi1d|TNRC19|WWP3	membrane associated guanylate kinase, WW and PDZ domain containing 1	protein-coding
18570	chr17	79737888	79738265	+	18	NA	intron (NM_178543, intron 5 of 5)	intron (NM_178543, intron 5 of 5)	7133	NM_178543	339221		NM_178543	ENSG00000182156	ENPP7	ALK-SMase|E-NPP 7|NPP-7|NPP7	ectonucleotide pyrophosphatase/phosphodiesterase 7	protein-coding
20809	chr3	50368125	50368172	+	18	NA	TTS (NR_111912)	TTS (NR_111912)	2785	NR_111914	101928965		NR_111913	ENSG00000271858	LOC101928965	-	uncharacterized LOC101928965	ncRNA
11962	chr9	23341508	23343790	+	18	NA	Intergenic	Intergenic	329750	NR_121602	101929563		NR_121602	ENSG00000283982	LOC101929563	-	uncharacterized LOC101929563	ncRNA
6095	chr18	31278373	31278874	+	18	NA	Intergenic	Intergenic	-39537	NM_001942	1828		NM_001942	ENSG00000134760	DSG1	CDHF4|DG1|DSG|EPKHE|EPKHIA|PPKS1|SPPK1	desmoglein 1	protein-coding
12945-2	chr6	24352700	24353390	+	18	NA	intron (NM_001195610, intron 3 of 10)	intron (NM_001195610, intron 3 of 10)	-3858	NM_181337	353219		NM_181337	ENSG00000146049	KAAG1	RU2AS	kidney associated DCDC2 antisense RNA 1	ncRNA
5154-2	chr2	64228058	64228671	+	18	NA	promoter-TSS (NR_120420)	promoter-TSS (NR_120420)	-37	NR_120420	100507006		NR_120420		LOC100507006	-	uncharacterized LOC100507006	ncRNA
17805	chr1	26418067	26419866	+	18	NA	intron (NM_024674, intron 2 of 3)	intron (NM_024674, intron 2 of 3)	8149	NM_024674	79727		NM_024674	ENSG00000131914	LIN28A	CSDD1|LIN-28|LIN28|ZCCHC1|lin-28A	lin-28 homolog A	protein-coding
5233	chr13	48585231	48585815	+	18	NA	Intergenic	Intergenic	-4622	NR_051983	100129597		NR_051983	ENSG00000233610	LINC00462	-	long intergenic non-protein coding RNA 462	ncRNA
9943	chr11	16968002	16968172	+	18	NA	intron (NM_175058, intron 3 of 22)	intron (NM_175058, intron 3 of 22)	-42065	NR_145810	109623465		NR_145810		SNORD147	-	small nucleolar RNA, C/D box 147	snoRNA
6544-2	chr13	80150442	80151609	+	18	NA	Intergenic	(GTTTT)n|Simple_repeat|Simple_repeat	139948	NR_104138	101515984		NR_104138		LINC01080	TCONS_00021856	long intergenic non-protein coding RNA 1080	ncRNA
6712	chr21	33894879	33895324	+	18	NA	3' UTR (NM_003024, exon 40 of 40)	3' UTR (NM_003024, exon 40 of 40)	20703	NM_001697	539		NM_001697	ENSG00000241837	ATP5PO	ATP5O|ATPO|HMC08D05|MC5DN7|OSCP	ATP synthase peripheral stalk subunit OSCP	protein-coding
24131	chr19	38836731	38837584	+	18	NA	intron (NM_001533, intron 12 of 12)	intron (NM_001533, intron 12 of 12)	-5363	NM_001398	1891		NM_001398	ENSG00000104823	ECH1	HPXEL	enoyl-CoA hydratase 1	protein-coding
9277-2	chr9	113454573	113455433	+	18	NA	intron (NM_144488, intron 1 of 25)	L1MEc|LINE|L1	-8697	NM_017790	5998		NM_017790	ENSG00000138835	RGS3	C2PA|RGP3	regulator of G protein signaling 3	protein-coding
8536	chr5	38119197	38120505	+	18	NA	intron (NR_147009, intron 2 of 2)	intron (NR_147009, intron 2 of 2)	-28629	NR_134272	101929745		NR_134272	ENSG00000248461	LINC02119	-	long intergenic non-protein coding RNA 2119	ncRNA
4726	chr18	75226637	75227207	+	18	NA	intron (NM_001308210, intron 1 of 1)	intron (NM_001308210, intron 1 of 1)	16125	NM_005786	10194		NM_005786	ENSG00000179981	TSHZ1	CAA|NY-CO-33|SDCCAG33|TSH1	teashirt zinc finger homeobox 1	protein-coding
6826	chr10	103732478	103733334	+	18	NA	intron (NM_014631, intron 4 of 13)	intron (NM_014631, intron 4 of 13)	-13873	NR_038940	100505839		NR_038940	ENSG00000280693	SH3PXD2A-AS1	-	SH3PXD2A antisense RNA 1	ncRNA
15061	chr17	72408799	72408902	+	18	NA	intron (NR_152515, intron 2 of 2)	MER21B|LTR|ERVL	66039	NR_135222	146795		NR_135222	ENSG00000264026	LINC02003	-	long intergenic non-protein coding RNA 2003	ncRNA
4546-2	chr11	3217195	3217899	+	18	NA	promoter-TSS (NR_027138)	promoter-TSS (NR_027138)	-785	NR_027138	283303		NM_173590	ENSG00000236301	MRGPRG-AS1	C11orf36|HSD-40	MRGPRG antisense RNA 1	ncRNA
6928	chr12	70365714	70366489	+	18	NA	promoter-TSS (NM_014505)	promoter-TSS (NM_014505)	-189	NM_014505	27345		NM_014505	ENSG00000135643	KCNMB4	-	potassium calcium-activated channel subfamily M regulatory beta subunit 4	protein-coding
8429-2	chr5	59562734	59563819	+	18	NA	intron (NM_001349242, intron 1 of 16)	intron (NM_001349242, intron 1 of 16)	23222	NM_006203	5144		NM_006203	ENSG00000113448	PDE4D	ACRDYS2|DPDE3|HSPDE4D|PDE43|PDE4DN2|STRK1	phosphodiesterase 4D	protein-coding
10494	chr4	49125378	49125646	+	18	NA	Intergenic	(TCCAT)n|Simple_repeat|Simple_repeat	138870	NM_001286791	80157		NM_025087	ENSG00000109182	CWH43	CWH43-C|PGAP2IP	cell wall biogenesis 43 C-terminal homolog	protein-coding
11629	chrX	44898096	44899416	+	18	NA	intron (NM_001291416, intron 2 of 28)	L1MD1|LINE|L1	25568	NM_001291415	7403		NM_021140	ENSG00000147050	KDM6A	KABUK2|UTX|bA386N14.2	lysine demethylase 6A	protein-coding
4633-5	chr9	105911334	105911894	+	18	NA	Intergenic	Intergenic	217073	NM_018112	55151		NM_018112	ENSG00000095209	TMEM38B	C9orf87|D4Ertd89e|OI14|TRIC-B|TRICB|bA219P18.1	transmembrane protein 38B	protein-coding
5299-2	chr6_GL000256v2_alt	4370462	4371214	+	18	NA	promoter-TSS (NM_001199455).6	promoter-TSS (NM_001199455).6	-4	NM_001199455	6046		NM_005104	ENSG00000204256	BRD2	BRD2-IT1|D6S113E|FSH|FSHRG1|FSRG1|NAT|O27.1.1|RING3|RNF3	bromodomain containing 2	protein-coding
5550	chr1	165137673	165138428	+	18	NA	Intergenic	Intergenic	218191	NM_001174069	4009		NM_177398	ENSG00000162761	LMX1A	DFNA7|LMX1|LMX1.1	LIM homeobox transcription factor 1 alpha	protein-coding
7223	chr6	27902395	27903427	+	18	NA	Intergenic	tRNA-Gly-GGY|tRNA|tRNA	9485	NM_033057	81697		NM_033057	ENSG00000168131	OR2B2	OR2B2Q|OR2B9|OR6-1|dJ193B12.4|hs6M1-10	olfactory receptor family 2 subfamily B member 2	protein-coding
11843	chr3	58010788	58010803	+	18	NA	intron (NM_001164319, intron 1 of 44)	intron (NM_001164319, intron 1 of 44)	2373	NM_001164319	2317		NM_001457	ENSG00000136068	FLNB	ABP-278|ABP-280|AOI|FH1|FLN-B|FLN1L|LRS1|SCT|TABP|TAP	filamin B	protein-coding
12121	chr9	95026793	95027127	+	18	NA	intron (NM_001193329, intron 12 of 15)	intron (NM_001193329, intron 12 of 15)	-38390	NR_106729	102466518		NR_106729	ENSG00000274115	MIR6081	hsa-mir-6081	microRNA 6081	ncRNA
15093	chr1	205935863	205937826	+	18	NA	intron (NM_134325, intron 1 of 21)	intron (NM_134325, intron 1 of 21)	1716	NR_110983	103021296		NR_110983		SLC26A9-AS1	-	SLC26A9 and RAB7B antisense RNA 1	ncRNA
10367	chr21	42955354	42956532	+	18	NA	Intergenic	Intergenic	-4929	NR_049889	100847013		NR_049889	ENSG00000264580	MIR5692B	-	microRNA 5692b	ncRNA
10919	chr3	179070862	179072313	+	18	NA	5' UTR (NM_001375824, exon 1 of 6)	5' UTR (NM_001375824, exon 1 of 6)	222	NM_001375826	64393		NM_022470	ENSG00000172667	ZMAT3	PAG608|WIG-1|WIG1	zinc finger matrin-type 3	protein-coding
8365-2	chr19	45792644	45793548	+	18	NA	promoter-TSS (NM_004943)	promoter-TSS (NM_004943)	-251	NM_004943	1762		NM_004943	ENSG00000185800	DMWD	D19S593E|DMR-N9|DMRN9|gene59	DM1 locus, WD repeat containing	protein-coding
4596	chr12	69240036	69240615	+	18	NA	intron (NM_001300947, intron 1 of 10)	intron (NM_001300947, intron 1 of 10)	756	NM_001300947	11052		NM_007007	ENSG00000111605	CPSF6	CFIM|CFIM68|CFIM72|HPBRII-4|HPBRII-7	cleavage and polyadenylation specific factor 6	protein-coding
6636	chr21	43712281	43713185	+	18	NA	Intergenic	LTR35A|LTR|ERV1	-6396	NM_003681	8566		NM_003681	ENSG00000160209	PDXK	C21orf124|C21orf97|HEL-S-1a|HMSN6C|PKH|PNK|PRED79	pyridoxal kinase	protein-coding
7981	chr1	182120517	182121268	+	18	NA	Intergenic	Intergenic	-59180	NM_001009992	127665		NM_001009992	ENSG00000179930	ZNF648	-	zinc finger protein 648	protein-coding
4035-4	chr20	23799363	23799678	+	18	NA	Intergenic	Intergenic	27209	NM_001322	1470		NM_001322	ENSG00000170369	CST2	-	cystatin SA	protein-coding
14931	chr19_GL949751v2_alt	166432	167140	+	18	NA	exon (NM_001282333, exon 3 of 6).2	exon (NM_001282333, exon 3 of 6).2	513	NM_001077446	79042		NM_024075	ENSG00000170892	TSEN34	LENG5|PCH2C|SEN34|SEN34L	tRNA splicing endonuclease subunit 34	protein-coding
4036-3	chr6	23584141	23584679	+	18	NA	Intergenic	Intergenic	-541805	NM_080723	140767		NM_080723	ENSG00000152954	NRSN1	VMP|p24	neurensin 1	protein-coding
6610	chr1	52098135	52098757	+	18	NA	Intergenic	MER1A|DNA|hAT-Charlie	42151	NM_152265	91408		NM_152265	ENSG00000134717	BTF3L4	-	basic transcription factor 3 like 4	protein-coding
21018	chr16	71851258	71854200	+	18	NA	3' UTR (NM_001137675, exon 3 of 3)	3' UTR (NM_001137675, exon 3 of 3)	6753	NM_001137675	342371		NM_001137675	ENSG00000224470	ATXN1L	BOAT|BOAT1	ataxin 1 like	protein-coding
11953	chr1	51686311	51687306	+	18	NA	intron (NM_024586, intron 3 of 23)	intron (NM_024586, intron 3 of 23)	-43042	NM_148904	114883		NM_024586	ENSG00000117859	OSBPL9	ORP-9|ORP9	oxysterol binding protein like 9	protein-coding
5591	chr11	129143231	129143806	+	18	NA	intron (NM_001378025, intron 2 of 21)	MER44C|DNA|TcMar-Tigger	48807	NM_001142685	9743		NM_014715	ENSG00000134909	ARHGAP32	GC-GAP|GRIT|PX-RICS|RICS|p200RhoGAP|p250GAP	Rho GTPase activating protein 32	protein-coding
6451	chr14	70317858	70318821	+	18	NA	Intergenic	Intergenic	41344	NM_016468	51241		NM_016468	ENSG00000133983	COX16	C14orf112|HSPC203|MC4DN22|hCOX16	cytochrome c oxidase assembly factor COX16	protein-coding
13057	chr20	62387736	62388034	+	18	NA	TTS (NM_031215)	TTS (NM_031215)	782	NM_001024	6227		NM_001024	ENSG00000171858	RPS21	HLDF|S21|eS21	ribosomal protein S21	protein-coding
9893-2	chr16	52827365	52828407	+	18	NA	Intergenic	LTR16E1|LTR|ERVL	-220911	NR_033920	643714		NR_033920	ENSG00000249231	CASC16	LINC00918	cancer susceptibility 16	ncRNA
8619	chr21	26100069	26101617	+	18	NA	intron (NM_001136130, intron 1 of 16)	intron (NM_001136130, intron 1 of 16)	39547	NM_001136016	351		NM_000484	ENSG00000142192	APP	AAA|ABETA|ABPP|AD1|APPI|CTFgamma|CVAP|PN-II|PN2|alpha-sAPP|preA4	amyloid beta precursor protein	protein-coding
12494	chr16	363139	363595	+	18	NA	Intergenic	Intergenic	7171	NM_006428	10573		NM_006428	ENSG00000086504	MRPL28	MAAT1|bL28m|p15	mitochondrial ribosomal protein L28	protein-coding
9373	chr3	186210230	186211060	+	18	NA	intron (NM_001346, intron 21 of 24)	intron (NM_001346, intron 21 of 24)	-101556	NM_004454	2119		NM_004454	ENSG00000244405	ETV5	ERM	ETS variant transcription factor 5	protein-coding
6628	chr11	71207206	71208495	+	18	NA	intron (NM_012309, intron 2 of 25)	intron (NM_012309, intron 2 of 25)	44727	NM_012309	22941		NM_012309	ENSG00000162105	SHANK2	AUTS17|CORTBP1|CTTNBP1|ProSAP1|SHANK|SPANK-3	SH3 and multiple ankyrin repeat domains 2	protein-coding
15783	chr12	108855190	108855333	+	18	NA	intron (NM_001161330, intron 1 of 13)	L1MB7|LINE|L1	2322	NM_018984	54434		NM_018984	ENSG00000084112	SSH1	SSH1L	slingshot protein phosphatase 1	protein-coding
8072	chr17	7207679	7207900	+	18	NA	promoter-TSS (NM_001369566)	promoter-TSS (NM_001369566)	-518	NM_001369566	1742		NM_001365	ENSG00000132535	DLG4	MRD62|PSD95|SAP-90|SAP90	discs large MAGUK scaffold protein 4	protein-coding
5280-5	chr7	27080775	27081457	+	18	NA	Intergenic	Intergenic	14884	NM_005522	3198		NM_005522	ENSG00000105991	HOXA1	BSAS|HOX1|HOX1F	homeobox A1	protein-coding
10842	chr4	76527382	76527385	+	18	NA	intron (NM_020859, intron 1 of 10)	AluSx|SINE|Alu	-46185	NR_039654	100616299		NR_039654	ENSG00000263445	MIR4450	mir-4450	microRNA 4450	ncRNA
12945	chr6	24351554	24352133	+	18	NA	intron (NM_001195610, intron 3 of 10)	AluSg|SINE|Alu	-5060	NM_181337	353219		NM_181337	ENSG00000146049	KAAG1	RU2AS	kidney associated DCDC2 antisense RNA 1	ncRNA
5537-3	chr12	42758807	42759392	+	18	NA	Intergenic	Intergenic	66883	NR_135028	105369739		NR_135028	ENSG00000257114	LINC02450	-	long intergenic non-protein coding RNA 2450	ncRNA
12354	chr16	67720136	67720436	+	18	NA	promoter-TSS (NR_027398)	promoter-TSS (NR_027398)	-970	NM_001243650	81577		NM_030819	ENSG00000141098	GFOD2	-	Gfo/Idh/MocA-like oxidoreductase domain containing 2	protein-coding
5741	chr4	97496210	97496905	+	18	NA	Intergenic	Intergenic	129631	NR_102713	101410545		NR_102713	ENSG00000251620	STPG2-AS1	-	STPG2 antisense RNA 1	ncRNA
6583-2	chr8	9628603	9629551	+	18	NA	intron (NM_003747, intron 3 of 26)	intron (NM_003747, intron 3 of 26)	73165	NM_003747	8658		NM_003747	ENSG00000173273	TNKS	ARTD5|PARP-5a|PARP5A|PARPL|TIN1|TINF1|TNKS1|pART5	tankyrase	protein-coding
9122	chr14	96308937	96310078	+	18	NA	exon (NM_018036, exon 29 of 42)	exon (NM_018036, exon 29 of 42)	53297	NM_000710	623		NM_000710	ENSG00000100739	BDKRB1	B1BKR|B1R|BKB1R|BKR1|BRADYB1	bradykinin receptor B1	protein-coding
20073	chr7	127617908	127618432	+	18	NA	promoter-TSS (NM_001366110)	promoter-TSS (NM_001366110)	-28	NM_001366110	5078		NM_006193	ENSG00000106331	PAX4	KPD|MODY9	paired box 4	protein-coding
16125	chr11	67369755	67370274	+	18	NA	intron (NM_001166212, intron 1 of 2)	intron (NM_001166212, intron 1 of 2)	3584	NM_013246	23529		NM_013246	ENSG00000175505	CLCF1	BSF-3|BSF3|CISS2|CLC|NNT-1|NNT1|NR6	cardiotrophin like cytokine factor 1	protein-coding
7925-2	chr7	51277585	51277784	+	18	NA	intron (NM_001346441, intron 1 of 12)	intron (NM_001346441, intron 1 of 12)	39125	NM_015198	23242		NM_015198	ENSG00000106078	COBL	-	cordon-bleu WH2 repeat protein	protein-coding
8446	chr18	57270446	57271508	+	18	NA	Intergenic	Intergenic	-81580	NM_015879	51046		NM_015879	ENSG00000177511	ST8SIA3	SIAT8C|ST8SiaIII	ST8 alpha-N-acetyl-neuraminide alpha-2,8-sialyltransferase 3	protein-coding
16603	chr3	141077725	141078879	+	18	NA	intron (NM_080862, intron 2 of 2)	MER5A|DNA|hAT-Charlie	26955	NM_080862	92369		NM_080862	ENSG00000175093	SPSB4	SSB-4|SSB4	splA/ryanodine receptor domain and SOCS box containing 4	protein-coding
13169	chr16	28374416	28375955	+	18	NA	Intergenic	Intergenic	-12325	NM_001282524	728741		NM_001282524	ENSG00000198156	NPIPB6	NPIPB	nuclear pore complex interacting protein family member B6	protein-coding
6709-2	chrX	33909811	33910563	+	18	NA	Intergenic	PABL_B|LTR|ERV1	222143	NM_203408	158724		NM_203408	ENSG00000185448	FAM47A	-	family with sequence similarity 47 member A	protein-coding
21474	chr19	4373255	4373656	+	18	NA	intron (NM_001199943, intron 1 of 8)	intron (NM_001199943, intron 1 of 8)	27092	NM_001199943	6455		NM_003025	ENSG00000141985	SH3GL1	CNSA1|EEN|SH3D2B|SH3P8	SH3 domain containing GRB2 like 1, endophilin A2	protein-coding
8515	chr3	76961339	76962456	+	18	NA	intron (NM_001378194, intron 1 of 27)	intron (NM_001378194, intron 1 of 27)	-78202	NM_001290065	6092		NM_002942	ENSG00000185008	ROBO2	SAX3	roundabout guidance receptor 2	protein-coding
4134	chr16	160234	160802	+	18	NA	Intergenic	Intergenic	-5460	NM_001003938	3042		NM_001003938	ENSG00000206177	HBM	HBAP2|HBK	hemoglobin subunit mu	protein-coding
10907	chr2	120275264	120275543	+	18	NA	intron (NM_002881, intron 1 of 4)	L1MEd|LINE|L1	22551	NM_001369400	5899		NM_002881	ENSG00000144118	RALB	-	RAS like proto-oncogene B	protein-coding
5640-2	chr20	62413951	62414530	+	18	NA	exon (NM_080833, exon 10 of 14)	exon (NM_080833, exon 10 of 14)	-6957	NM_031215	81928		NM_031215	ENSG00000149679	CABLES2	C20orf150|dJ908M14.2|ik3-2	Cdk5 and Abl enzyme substrate 2	protein-coding
7848-2	chr3	37993732	37994768	+	18	NA	non-coding (NR_163266, exon 1 of 17)	non-coding (NR_163266, exon 1 of 17)	112	NM_001370265	50853		NM_015873	ENSG00000136059	VILL	-	villin like	protein-coding
2667-6	chr20	28307987	28308371	+	18	NA	Intergenic	ALR/Alpha|Satellite|centr	294486	NR_132315	100289097		NR_132315	ENSG00000282826	FRG1CP	-	FSHD region gene 1 family member C, pseudogene	pseudo
3675-7	chr8	94439672	94440034	+	18	NA	intron (NM_001205262, intron 3 of 3)	MER4E|LTR|ERV1	-2909	NM_001205263	25788		NM_006550	ENSG00000197275	RAD54B	RDH54	RAD54 homolog B	protein-coding
12965	chrX	24646699	24648045	+	18	NA	promoter-TSS (NM_004845)	promoter-TSS (NM_004845)	-25	NM_004845	9468		NM_004845	ENSG00000102230	PCYT1B	CCTB|CTB	phosphate cytidylyltransferase 1B, choline	protein-coding
6009-2	chr17	44829299	44830084	+	18	NA	intron (NM_001080383, intron 1 of 2)	CpG	596	NM_005497	10052		NM_005497	ENSG00000182963	GJC1	CX45|GJA7	gap junction protein gamma 1	protein-coding
19619	chr1	8363512	8364173	+	18	NA	intron (NM_001042682, intron 5 of 12)	intron (NM_001042682, intron 5 of 12)	45728	NM_001379614	50651		NM_001080397	ENSG00000162426	SLC45A1	DNB5|IDDNPF|PAST-A	solute carrier family 45 member 1	protein-coding
5851	chr12	101280002	101280394	+	18	NA	promoter-TSS (NM_014503)	promoter-TSS (NM_014503)	93	NM_014503	27340		NM_014503	ENSG00000120800	UTP20	1A6/DRIM|DRIM	UTP20 small subunit processome component	protein-coding
6802-3	chr17	78314142	78314661	+	18	NA	Intergenic	CpG	-35909	NR_073178	100996291		NR_073178	ENSG00000204277	LINC01993	-	long intergenic non-protein coding RNA 1993	ncRNA
7184	chrX	53072798	53072968	+	18	NA	intron (NM_018969, intron 1 of 1)	intron (NM_018969, intron 1 of 1)	-9484	NM_022117	64061		NM_022117	ENSG00000184205	TSPYL2	CDA1|CINAP|CTCL|DENTT|HRIHFB2216|NP79|SE204|TSPX	TSPY like 2	protein-coding
10350	chr1	217452750	217453471	+	18	NA	intron (NM_018040, intron 8 of 9)	intron (NM_018040, intron 8 of 9)	177980	NM_018040	55105		NM_018040	ENSG00000092978	GPATCH2	CT110|GPATC2|PPP1R30|Pfa1	G-patch domain containing 2	protein-coding
13069	chr20	62487191	62488165	+	18	NA	Intergenic	Intergenic	-11683	NM_080473	140628		NM_080473	ENSG00000130700	GATA5	CHTD5|GATAS|bB379O24.1	GATA binding protein 5	protein-coding
7933	chr2	231197981	231199164	+	18	NA	promoter-TSS (NM_001271466)	promoter-TSS (NM_001271466)	-59	NM_001352755	80210		NM_025139	ENSG00000135931	ARMC9	ARM|JBTS30|KU-MEL-1|NS21	armadillo repeat containing 9	protein-coding
3874-4	chr3	194486760	194487115	+	18	NA	promoter-TSS (NM_001374836)	promoter-TSS (NM_001374836)	65	NR_164667	79572		NM_024524	ENSG00000133657	ATP13A3	AFURS1|PPH5	ATPase 13A3	protein-coding
16674	chr1	197774497	197775015	+	18	NA	intron (NR_125340, intron 1 of 19)	intron (NR_125340, intron 1 of 19)	724	NM_001300858	163486		NM_019049	ENSG00000213047	DENND1B	C1ORF18|C1orf218|FAM31B	DENN domain containing 1B	protein-coding
15172	chr3	8654842	8656151	+	18	NA	Intergenic	Intergenic	-3412	NM_001256749	51066		NM_015931	ENSG00000125046	SSUH2	C3orf32|SSU-2|fls485	ssu-2 homolog	protein-coding
5778	chr14	25110899	25111560	+	18	NA	Intergenic	Intergenic	-60932	NM_001304476	29091		NM_014178	ENSG00000168952	STXBP6	HSPC156|amisyn	syntaxin binding protein 6	protein-coding
7562	chr5	107808214	107808227	+	18	NA	Intergenic	Intergenic	-137283	NM_001962	1946		NM_001962	ENSG00000184349	EFNA5	AF1|EFL5|EPLG7|GLC1M|LERK7|RAGS	ephrin A5	protein-coding
9267	chr2	215420561	215422506	+	18	NA	intron (NM_001365518, intron 10 of 44)	intron (NM_001365518, intron 10 of 44)	14535	NM_001365521	2335		NM_002026	ENSG00000115414	FN1	CIG|ED-B|FINC|FN|FNZ|GFND|GFND2|LETS|MSF|SMDCF	fibronectin 1	protein-coding
5670-3	chr20	63627049	63627729	+	18	NA	promoter-TSS (NM_012384)	promoter-TSS (NM_012384)	154	NR_132417	100505771		NR_132417	ENSG00000232442	MHENCR	-	melanoma highly expressed competing endogenous lncRNA for miR-425 and miR-489	ncRNA
13220-2	chr8	6561604	6561643	+	18	NA	intron (NM_001118887, intron 1 of 8)	intron (NM_001118887, intron 1 of 8)	1622	NM_001118887	285		NM_001147	ENSG00000091879	ANGPT2	AGPT2|ANG2|LMPHM10	angiopoietin 2	protein-coding
7678	chrX	123772744	123772752	+	18	NA	Intergenic	AluY|SINE|Alu	-39696	NM_001081550	57187		NM_020449	ENSG00000125676	THOC2	CXorf3|MRX12|MRX35|THO2|XLID12|dJ506G2.1|hTREX120	THO complex subunit 2	protein-coding
4719-3	chr3	155660916	155661635	+	18	NA	intron (NM_001349251, intron 2 of 22)	intron (NM_001349251, intron 2 of 22)	15068	NM_001130960	23007		NM_014996	ENSG00000114805	PLCH1	HPE14|PLC eta 1|PLC-L3|PLCL3	phospholipase C eta 1	protein-coding
11929-2	chr22	37969597	37969639	+	17	NA	TTS (NR_125371)	TTS (NR_125371)	2055	NR_106878	102465492		NR_106878	ENSG00000284289	MIR6820	hsa-mir-6820	microRNA 6820	ncRNA
8523-2	chr6	84086691	84087535	+	17	NA	intron (NM_138409, intron 3 of 3)	MER4A1|LTR|ERV1	52994	NM_001346544	112609		NM_138409	ENSG00000135324	MRAP2	C6orf117|bA51G5.2	melanocortin 2 receptor accessory protein 2	protein-coding
6769-2	chr10	110564059	110565144	+	17	NA	Intergenic	LTR45C|LTR|ERV1	-3094	NM_005445	9126		NM_005445	ENSG00000108055	SMC3	BAM|BMH|CDLS3|CSPG6|HCAP|SMC3L1	structural maintenance of chromosomes 3	protein-coding
14079	chr15	63276670	63277438	+	17	NA	promoter-TSS (NM_031301)	promoter-TSS (NM_031301)	-496	NM_001145646	83464		NM_031301	ENSG00000138613	APH1B	APH-1B|PRO1328|PSFL|TAAV688|aph-1beta	aph-1 homolog B, gamma-secretase subunit	protein-coding
15913	chr2	202036399	202037219	+	17	NA	3' UTR (NM_003507, exon 1 of 1)	3' UTR (NM_003507, exon 1 of 1)	2222	NM_003507	8324		NM_003507	ENSG00000155760	FZD7	FzE3	frizzled class receptor 7	protein-coding
7496-2	chr11	72685272	72685737	+	17	NA	non-coding (NR_161388, exon 30 of 30)	non-coding (NR_161388, exon 30 of 30)	-11082	NM_002599	5138		NM_002599	ENSG00000186642	PDE2A	CGS-PDE|IDDPADS|PDE2A1|PED2A4|cGSPDE	phosphodiesterase 2A	protein-coding
8115	chr7	12942242	12943243	+	17	NA	Intergenic	MIRc|SINE|MIR	255109	NM_005738	10124		NM_005738	ENSG00000122644	ARL4A	ARL4	ADP ribosylation factor like GTPase 4A	protein-coding
15156-2	chr1	26171269	26172149	+	17	NA	TTS (NM_015871)	TTS (NM_015871)	1801	NM_015871	51042		NM_015871	ENSG00000142684	ZNF593	ZT86	zinc finger protein 593	protein-coding
4689-2	chr20	461610	462258	+	17	NA	intron (NR_111901, intron 1 of 9)	CpG	599	NM_144628	128637		NM_144628	ENSG00000125875	TBC1D20	C20orf140|WARBM4	TBC1 domain family member 20	protein-coding
9708	chr4	119731220	119731419	+	17	NA	Intergenic	Intergenic	73196	NR_110660	101927007		NR_110660	ENSG00000250772	LINC01365	-	long intergenic non-protein coding RNA 1365	ncRNA
11929	chr22	37967856	37969452	+	17	NA	non-coding (NR_125371, exon 5 of 5)	non-coding (NR_125371, exon 5 of 5)	1091	NR_106878	102465492		NR_106878	ENSG00000284289	MIR6820	hsa-mir-6820	microRNA 6820	ncRNA
9210	chr5	168401739	168402691	+	17	NA	intron (NM_015238, intron 5 of 22)	intron (NM_015238, intron 5 of 22)	-84256	NM_002887	5917		NM_002887	ENSG00000113643	RARS1	ArgRS|DALRD1|HLD9|RARS	arginyl-tRNA synthetase 1	protein-coding
24839-2	chr3	193869364	193870162	+	17	NA	Intergenic	CpG	-25754	NR_146718	105374285		NR_146718		LINC02038	-	long intergenic non-protein coding RNA 2038	ncRNA
7776-2	chrX	44971554	44972789	+	17	NA	intron (NM_001291416, intron 3 of 28)	intron (NM_001291416, intron 3 of 28)	98983	NM_001291415	7403		NM_021140	ENSG00000147050	KDM6A	KABUK2|UTX|bA386N14.2	lysine demethylase 6A	protein-coding
9117-3	chr7	130668443	130669181	+	17	NA	promoter-TSS (NM_012133)	promoter-TSS (NM_012133)	-54	NM_001290033	26958		NM_012133	ENSG00000158623	COPG2	2-COP|gamma-2-COP	COPI coat complex subunit gamma 2	protein-coding
8193	chr19	42409458	42410727	+	17	NA	intron (NM_005357, intron 2 of 9)	intron (NM_005357, intron 2 of 9)	12944	NR_073180	100996307		NR_073179	ENSG00000213904	LIPE-AS1	-	LIPE antisense RNA 1	ncRNA
7702	chr6	37125655	37126820	+	17	NA	Intergenic	Intergenic	-43915	NM_002648	5292		NM_002648	ENSG00000137193	PIM1	PIM	Pim-1 proto-oncogene, serine/threonine kinase	protein-coding
4543	chr22	41093987	41094552	+	17	NA	intron (NM_001362843, intron 1 of 29)	intron (NM_001362843, intron 1 of 29)	1677	NM_001429	2033		NM_001429	ENSG00000100393	EP300	KAT3B|MKHK2|RSTS2|p300	E1A binding protein p300	protein-coding
6151	chr18	21697455	21698228	+	17	NA	intron (NM_138340, intron 3 of 8)	intron (NM_138340, intron 3 of 8)	6933	NM_001308256	171586		NM_138340	ENSG00000158201	ABHD3	LABH3	abhydrolase domain containing 3, phospholipase	protein-coding
4371	chr22	42943809	42944329	+	17	NA	intron (NM_001184970, intron 1 of 10)	intron (NM_001184970, intron 1 of 10)	2972	NM_007229	11252		NM_007229	ENSG00000100266	PACSIN2	SDPII	protein kinase C and casein kinase substrate in neurons 2	protein-coding
5628	chr8	31665789	31666359	+	17	NA	intron (NM_013962, intron 1 of 4)	intron (NM_013962, intron 1 of 4)	26322	NM_013962	3084		NM_004495	ENSG00000157168	NRG1	ARIA|GGF|GGF2|HGL|HRG|HRG1|HRGA|MST131|MSTP131|NDF|NRG1-IT2|SMDF	neuregulin 1	protein-coding
12618	chr6	139881371	139882346	+	17	NA	Intergenic	Intergenic	27008	NR_138541	100132735		NR_038399	ENSG00000231426	FILNC1	-	FOXO induced long non-coding RNA 1	ncRNA
8676-2	chr1	229124552	229125156	+	17	NA	Intergenic	Intergenic	49947	NR_039659	100616234		NR_039659	ENSG00000283468	MIR4454	-	microRNA 4454	ncRNA
13738	chr6	136524840	136527079	+	17	NA	exon (NM_001198611, exon 1 of 17)	exon (NM_001198611, exon 1 of 17)	254	NM_001198611	9053		NM_003980	ENSG00000135525	MAP7	E-MAP-115|EMAP115	microtubule associated protein 7	protein-coding
13979	chr1	201467547	201467553	+	17	NA	non-coding (NR_073080, exon 2 of 3)	non-coding (NR_073080, exon 2 of 3)	1621	NR_073080	23612		NM_012396	ENSG00000174307	PHLDA3	TIH1	pleckstrin homology like domain family A member 3	protein-coding
10676	chr12	64997619	64999398	+	17	NA	Intergenic	Intergenic	-6217	NR_146276	109729131		NR_146276	ENSG00000248995	LINC02231	-	long intergenic non-protein coding RNA 2231	ncRNA
5243-2	chr19	57487698	57488248	+	17	NA	exon (NM_001098493, exon 1 of 4)	exon (NM_001098493, exon 1 of 4)	223	NM_001098491	79744		NM_024691	ENSG00000105136	ZNF419	ZAPHIR|ZNF419A	zinc finger protein 419	protein-coding
7897	chr12	32419142	32419766	+	17	NA	intron (NM_001370298, intron 1 of 16)	L1M1|LINE|L1	19896	NM_001384126	121512		NM_139241	ENSG00000139132	FGD4	CMT4H|FRABP|ZFYVE6	FYVE, RhoGEF and PH domain containing 4	protein-coding
4293-6	chrX	154490841	154491353	+	17	NA	promoter-TSS (NM_001142391)	promoter-TSS (NM_001142391)	-468	NM_001142392	8273		NM_019848	ENSG00000126903	SLC10A3	DXS253E|P3	solute carrier family 10 member 3	protein-coding
12904	chr12	32564166	32564290	+	17	NA	non-coding (NR_168884, exon 2 of 3)	non-coding (NR_168884, exon 2 of 3)	29906	NM_001384130	121512		NM_139241	ENSG00000139132	FGD4	CMT4H|FRABP|ZFYVE6	FYVE, RhoGEF and PH domain containing 4	protein-coding
7853	chr13	61282836	61283923	+	17	NA	Intergenic	MLT1A0|LTR|ERVL-MaLR	-83499	NR_036128	100422973		NR_036128	ENSG00000266663	MIR3169	-	microRNA 3169	ncRNA
8676	chr1	229123930	229124384	+	17	NA	Intergenic	Intergenic	50644	NR_039659	100616234		NR_039659	ENSG00000283468	MIR4454	-	microRNA 4454	ncRNA
4440-2	chr3	149372601	149373129	+	17	NA	intron (NM_014220, intron 3 of 4)	L2c|LINE|L2	4784	NM_014220	4071		NM_014220	ENSG00000169908	TM4SF1	H-L6|L6|M3S1|TAAL6	transmembrane 4 L six family member 1	protein-coding
3346-4	chr21	10692352	10693096	+	17	NA	Intergenic	(TTCCA)n|Simple_repeat|Simple_repeat	171141	NM_199260	7179		NM_199259	ENSG00000274391	TPTE	CT44|PTEN2|TPTE1	transmembrane phosphatase with tensin homology	protein-coding
11495	chr16	29284345	29284497	+	17	NA	Intergenic	Intergenic	-17866	NR_002939	440352		NR_002939		SNX29P2	RUNDC2C	sorting nexin 29 pseudogene 2	pseudo
5487-3	chr8	120827613	120828200	+	17	NA	Intergenic	Intergenic	-15860	NM_021021	6641		NM_021021	ENSG00000172164	SNTB1	59-DAP|A1B|BSYN2|DAPA1B|SNT2|SNT2B1|TIP-43	syntrophin beta 1	protein-coding
20943	chr17	72477351	72478252	+	17	NA	intron (NR_036488, intron 1 of 3)	intron (NR_036488, intron 1 of 3)	115003	NR_152515	100499467		NR_036488	ENSG00000227036	LINC00673	ERRLR01|HI-LNC75|HILNC75|LUCAIR1|RASON|SLNCR|SLNCR1	long intergenic non-protein coding RNA 673	ncRNA
18223	chr22	37749325	37749485	+	17	NA	intron (NM_138632, intron 1 of 7)	intron (NM_138632, intron 1 of 7)	3171	NM_138632	11078		NM_007032	ENSG00000100106	TRIOBP	DFNB28|HRIHFB2122|TAP68|TARA|dJ37E16.4	TRIO and F-actin binding protein	protein-coding
6078-4	chr3	46585166	46585694	+	17	NA	Intergenic	LTR16|LTR|ERVL	7642	NM_003212	6997		NM_003212	ENSG00000241186	CRIPTO	CR|CR-1|CRGF|TDGF1	cripto, EGF-CFC family member	protein-coding
5516	chr1	3069625	3070291	+	17	NA	intron (NM_199454, intron 1 of 16)	CpG	755	NM_199454	63976		NM_022114	ENSG00000142611	PRDM16	CMD1LL|KMT8F|LVNC8|MEL1|PFM13	PR/SET domain 16	protein-coding
6062	chr9	93670769	93671478	+	17	NA	intron (NM_005392, intron 17 of 21)	intron (NM_005392, intron 17 of 21)	76282	NR_049853	100847045		NR_049853	ENSG00000283146	MIR548AU	-	microRNA 548au	ncRNA
32333	chr20	32462000	32462530	+	17	NA	intron (NM_080616, intron 2 of 7)	intron (NM_080616, intron 2 of 7)	21225	NM_001351680	140688		NM_080616	ENSG00000197183	NOL4L	C20orf112|C20orf113	nucleolar protein 4 like	protein-coding
5121	chr17	45143393	45143936	+	17	NA	3' UTR (NM_001135707, exon 10 of 10)	3' UTR (NM_001135707, exon 10 of 10)	-4811	NM_006460	10614		NM_006460	ENSG00000186834	HEXIM1	CLP1|EDG1|HIS1|MAQ1	HEXIM P-TEFb complex subunit 1	protein-coding
6206-2	chr2	68943585	68944398	+	17	NA	Intergenic	L1PA16|LINE|L1	8902	NM_182536	200504		NM_182536	ENSG00000183607	GKN2	BRICD1B|GDDR|PRO813|TFIZ1|VLTI465	gastrokine 2	protein-coding
18472	chr22	12177311	12178777	+	17	NA	Intergenic	Intergenic	280638	NR_110761	102723769		NR_110761		LOC102723769	-	uncharacterized LOC102723769	ncRNA
7033	chr5	160421737	160422551	+	17	NA	5' UTR (NM_001282383, exon 1 of 6)	5' UTR (NM_001282383, exon 1 of 6)	234	NM_001282382	9232		NM_004219	ENSG00000164611	PTTG1	EAP1|ECRAR|HPTTG|PTTG|TUTR1	PTTG1 regulator of sister chromatid separation, securin	protein-coding
11822	chr11	100776110	100777628	+	17	NA	intron (NM_152432, intron 2 of 23)	AluSx|SINE|Alu	-88914	NR_133571	100128386		NR_133571	ENSG00000248027	ARHGAP42-AS1	-	ARHGAP42 antisense RNA 1	ncRNA
7584-2	chr3	40833640	40833862	+	17	NA	Intergenic	Intergenic	308791	NM_198484	285268		NM_198484	ENSG00000172888	ZNF621	-	zinc finger protein 621	protein-coding
9511	chr1	218587009	218587435	+	17	NA	intron (NR_031644, intron 2 of 6)	MER1B|DNA|hAT-Charlie	77127	NR_146760	440714		NR_146760	ENSG00000228208	LINC02869	C1orf143	long intergenic non-protein coding RNA 2869	ncRNA
4994-5	chrX	133892136	133892886	+	17	NA	intron (NM_001164619, intron 1 of 6)	intron (NM_001164619, intron 1 of 6)	-4932	NR_148713	110806308		NR_148713	ENSG00000286096	GPC3-AS1	-	GPC3 antisense RNA 1	ncRNA
7778	chr17	1597876	1598849	+	17	NA	intron (NM_152346, intron 5 of 13).2	AluSg7|SINE|Alu	6672	NM_001284499	124935		NM_152346	ENSG00000167703	SLC43A2	LAT4	solute carrier family 43 member 2	protein-coding
3857-3	chr2	55014389	55014739	+	17	NA	intron (NM_153828, intron 1 of 6)	AluSc|SINE|Alu	-4292	NM_007008	57142		NM_007008	ENSG00000115310	RTN4	ASY|NI220/250|NOGO|NSP|NSP-CL|Nbla00271|Nbla10545|RTN-X|RTN4-A|RTN4-B1|RTN4-B2|RTN4-C	reticulon 4	protein-coding
6221	chr22	36026233	36027256	+	17	NA	intron (NM_001349999, intron 1 of 13)	intron (NM_001349999, intron 1 of 13)	2080	NM_001082578	23543		NM_014309	ENSG00000100320	RBFOX2	FOX2|Fox-2|HNRBP2|HRNBP2|RBM9|RTA|dJ106I20.3|fxh	RNA binding fox-1 homolog 2	protein-coding
12671	chr7	1067109	1067709	+	17	NA	intron (NM_032350, intron 2 of 4)	intron (NM_032350, intron 2 of 4)	12039	NM_138445	115330		NM_138445	ENSG00000164849	GPR146	PGR8	G protein-coupled receptor 146	protein-coding
7989	chr10	23055816	23056722	+	17	NA	Intergenic	Intergenic	-39310	NM_012228	22921		NM_012228	ENSG00000148450	MSRB2	CBS-1|CBS1|CGI-131|MSRB|PILB	methionine sulfoxide reductase B2	protein-coding
5263-2	chr19	10543520	10544096	+	17	NA	promoter-TSS (NM_001281504)	promoter-TSS (NM_001281504)	-96	NR_104024	84971		NM_032885	ENSG00000130734	ATG4D	APG4-D|APG4D|AUTL4|HsAPG4D	autophagy related 4D cysteine peptidase	protein-coding
4689	chr1	70667470	70668328	+	17	NA	Intergenic	Intergenic	-38554	NR_125938	101927244		NR_125938	ENSG00000229051	LINC01788	-	long intergenic non-protein coding RNA 1788	ncRNA
5533	chr13	51674401	51674930	+	17	NA	intron (NM_052950, intron 2 of 11)	intron (NM_052950, intron 2 of 11)	90203	NM_052950	115825		NM_052950	ENSG00000139668	WDFY2	PROF|WDF2|ZFYVE22	WD repeat and FYVE domain containing 2	protein-coding
8785	chr4	163403711	163405100	+	17	NA	Intergenic	Intergenic	60303	NM_001317091	4889		NM_006174	ENSG00000164129	NPY5R	NPY5-R|NPYR5|NPYY5-R	neuropeptide Y receptor Y5	protein-coding
13834	chr11	79439614	79439680	+	17	NA	intron (NM_001098816, intron 1 of 33)	CpG	1383	NM_001098816	26011		NM_001098816	ENSG00000149256	TENM4	Doc4|ETM5|ODZ4|TEN4|TNM4|Ten-M4|ten-4	teneurin transmembrane protein 4	protein-coding
5361-2	chr4	18882371	18882835	+	17	NA	Intergenic	L2c|LINE|L2	-860728	NM_153686	254251		NM_153686	ENSG00000178177	LCORL	MLR1	ligand dependent nuclear receptor corepressor like	protein-coding
4749	chr16	53048552	53049158	+	17	NA	intron (NR_147075, intron 1 of 2)	LTR33|LTR|ERVL	4018	NR_147075	105371267		NM_001396020	ENSG00000277639	CHD9NB	PR-lncRNA-1	CHD9 neighbor	protein-coding
4608	chr12	24256672	24257120	+	17	NA	intron (NM_001261414, intron 4 of 16)	intron (NM_001261414, intron 4 of 16)	33625	NR_120472	101928471		NR_120472	ENSG00000256120	SOX5-AS1	-	SOX5 antisense RNA 1	ncRNA
4290-3	chr3	141876575	141877037	+	17	NA	exon (NM_001679, exon 1 of 7)	exon (NM_001679, exon 1 of 7)	163	NM_001679	483		NM_001679	ENSG00000069849	ATP1B3	ATPB-3|CD298	ATPase Na+/K+ transporting subunit beta 3	protein-coding
10373	chr11	65212928	65212964	+	17	NA	promoter-TSS (NR_033396)	promoter-TSS (NR_033396)	-894	NR_033396	440044		NM_001004326	ENSG00000293475	SLC22A20P	Oat6|SLC22A20	solute carrier family 22 member 20, pseudogene	pseudo
6142	chr11	47118566	47119557	+	17	NA	intron (NM_001003676, intron 3 of 7)	L1PA6|LINE|L1	57818	NM_032389	84364		NM_032389	ENSG00000149182	ARFGAP2	IRZ|NBLA10535|ZFP289|ZNF289	ADP ribosylation factor GTPase activating protein 2	protein-coding
15753	chr20	64038670	64039628	+	17	NA	TTS (NM_001348090)	TTS (NM_001348090)	5422	NM_001348090	284739		NM_207349	ENSG00000196421	C20orf204	LINC00176|NCRNA00176|PRR17	chromosome 20 open reading frame 204	protein-coding
6231	chrX	23783830	23783838	+	17	NA	non-coding (NR_027783, exon 3 of 7)	non-coding (NR_027783, exon 3 of 7)	676	NM_002970	6303		NM_002970	ENSG00000130066	SAT1	DC21|KFSD|KFSDX|SAT|SSAT|SSAT-1	spermidine/spermine N1-acetyltransferase 1	protein-coding
14552	chr6	37170350	37171257	+	17	NA	exon (NM_002648, exon 2 of 6)	exon (NM_002648, exon 2 of 6)	651	NM_001243186	5292		NM_002648	ENSG00000137193	PIM1	PIM	Pim-1 proto-oncogene, serine/threonine kinase	protein-coding
9104	chr8	38441948	38442057	+	17	NA	intron (NM_001174064, intron 2 of 18)	intron (NM_001174064, intron 2 of 18)	25722	NM_001174066	2260		NM_015850	ENSG00000077782	FGFR1	BFGFR|CD331|CEK|ECCL|FGFBR|FGFR-1|FLG|FLT-2|FLT2|HBGFR|HH2|HRTFDS|KAL2|N-SAM|OGD|bFGF-R-1	fibroblast growth factor receptor 1	protein-coding
4587	chr11	45843227	45843788	+	17	NA	Intergenic	Intergenic	-3611	NM_001127457	1408		NM_021117	ENSG00000121671	CRY2	HCRY2|PHLL2	cryptochrome circadian regulator 2	protein-coding
8362	chr10	102480251	102480501	+	17	NA	3' UTR (NM_005736, exon 11 of 11)	3' UTR (NM_005736, exon 11 of 11)	18981	NM_024789	79847		NM_024789	ENSG00000138111	MFSD13A	C10orf77|TMEM180|bA18I14.8	major facilitator superfamily domain containing 13A	protein-coding
5647-2	chr3_KI270784v1_alt	77630	78432	+	17	NA	non-coding (NR_146164, exon 3 of 18).2	non-coding (NR_146164, exon 3 of 18).2	4323	NR_146164	728262		NM_001145248	ENSG00000290937	FAM157A	GTF2IP18	family with sequence similarity 157 member A	ncRNA
12313	chr16	87948046	87948217	+	17	NA	Intergenic	MIRb|SINE|MIR	-1107	NM_001384941	54971		NM_017869	ENSG00000172530	BANP	BEND1|SMAR1|SMARBP1	BTG3 associated nuclear protein	protein-coding
16851	chr18	76621096	76621699	+	17	NA	intron (NR_120419, intron 1 of 1)	intron (NR_120419, intron 1 of 1)	1620	NR_120419	400660		NR_120419	ENSG00000266256	LINC00683	-	long intergenic non-protein coding RNA 683	ncRNA
6755	chr9	12809605	12810506	+	17	NA	intron (NR_125775, intron 1 of 3)	L1MCa|LINE|L1	4334	NR_125775	101929467		NR_125775	ENSG00000235448	LURAP1L-AS1	-	LURAP1L antisense RNA 1	ncRNA
8015	chr17	74987253	74987858	+	17	NA	promoter-TSS (NM_014603)	promoter-TSS (NM_014603)	-77	NM_014603	30850		NM_014603	ENSG00000109089	CDR2L	HUMPPA	cerebellar degeneration related protein 2 like	protein-coding
3403-3	chr3	136576656	136577101	+	17	NA	intron (NM_005862, intron 4 of 33)	intron (NM_005862, intron 4 of 33)	175500	NM_005862	10274		NM_005862	ENSG00000118007	STAG1	MRD47|SA1|SCC3A	STAG1 cohesin complex component	protein-coding
8752	chr15	74208815	74209939	+	17	NA	promoter-TSS (NM_001142619)	promoter-TSS (NM_001142619)	328	NM_001199040	64220		NM_022369	ENSG00000137868	STRA6	MCOPCB8|MCOPS9|PP14296	signaling receptor and transporter of retinol STRA6	protein-coding
13580	chr5	80180875	80182314	+	17	NA	intron (NM_001174072, intron 2 of 11)	intron (NM_001174072, intron 2 of 11)	74454	NM_001174071	256987		NM_178276	ENSG00000164300	SERINC5	C5orf12|TPO1	serine incorporator 5	protein-coding
12302	chr4	71709619	71710989	+	17	NA	Intergenic	L1MD2|LINE|L1	73775	NM_000583	2638		NM_000583	ENSG00000145321	GC	DBP|DBP-maf|DBP/GC|GRD3|Gc-MAF|GcMAF|HEL-S-51|VDB|VDBG|VDBP	GC vitamin D binding protein	protein-coding
12735	chr3	134845624	134846099	+	17	NA	intron (NM_004441, intron 1 of 15)	intron (NM_004441, intron 1 of 15)	50601	NM_004441	2047		NM_004441	ENSG00000154928	EPHB1	ELK|EPHT2|Hek6|NET	EPH receptor B1	protein-coding
5321-2	chr2	200483418	200484437	+	17	NA	Intergenic	LTR41|LTR|ERVL	26141	NM_001321550	130535		NM_152387	ENSG00000155729	KCTD18	6530404F10Rik	potassium channel tetramerization domain containing 18	protein-coding
9775	chr7	121027273	121027394	+	17	NA	intron (NM_001105533, intron 2 of 17)	L2a|LINE|L2	37942	NM_001105533	79974		NM_024913	ENSG00000106034	CPED1	C7orf58	cadherin like and PC-esterase domain containing 1	protein-coding
6629	chr19	32869974	32870847	+	17	NA	promoter-TSS (NM_001126335)	promoter-TSS (NM_001126335)	-643	NM_014270	11136		NM_014270	ENSG00000021488	SLC7A9	BAT1|CSNU3	solute carrier family 7 member 9	protein-coding
6991-2	chr4	183118424	183119582	+	17	NA	intron (NM_024949, intron 1 of 22)	intron (NM_024949, intron 1 of 22)	19746	NM_024949	80014		NM_024949	ENSG00000151718	WWC2	BOMB	WW and C2 domain containing 2	protein-coding
11992	chr14	24430837	24431152	+	17	NA	intron (NM_015299, intron 2 of 7)	intron (NM_015299, intron 2 of 7)	1040	NM_001290257	23351		NM_015299	ENSG00000100441	KHNYN	KIAA0323	KH and NYN domain containing	protein-coding
31783	chr19	45102503	45103145	+	17	NA	intron (NM_019121, intron 1 of 12)	intron (NM_019121, intron 1 of 12)	9645	NM_019121	284352		NM_019121	ENSG00000104866	PPP1R37	LRRC68	protein phosphatase 1 regulatory subunit 37	protein-coding
12887	chr9	131111344	131112677	+	17	NA	intron (NM_031426, intron 3 of 5)	intron (NM_031426, intron 3 of 5)	-13576	NM_001318324	8021		NM_005085	ENSG00000126883	NUP214	CAIN|CAN|IIAE9	nucleoporin 214	protein-coding
7685	chr15	65132463	65133316	+	17	NA	intron (NM_005707, intron 1 of 4)	intron (NM_005707, intron 1 of 4)	919	NM_005707	10081		NM_005707	ENSG00000090470	PDCD7	59K|ES18|HES18	programmed cell death 7	protein-coding
8438	chr4	95408830	95409462	+	17	NA	intron (NM_003728, intron 1 of 15)	MIRc|SINE|MIR	139827	NM_003728	8633		NM_003728	ENSG00000182168	UNC5C	UNC5H3	unc-5 netrin receptor C	protein-coding
11756	chr2	185274861	185275377	+	17	NA	Intergenic	L2|LINE|L2	-108047	NR_136319	105373782		NR_136319		LOC105373782	-	uncharacterized LOC105373782	ncRNA
25634	chr13	79665703	79666292	+	17	NA	Intergenic	L1MB7|LINE|L1	99270	NR_125772	103724388		NR_125772	ENSG00000227676	LINC01068	-	long intergenic non-protein coding RNA 1068	ncRNA
6951	chr1	103457753	103458759	+	17	NA	intron (NR_168321, intron 1 of 3)	(GT)n|Simple_repeat|Simple_repeat	67252	NR_168319	101928436		NM_001286997	ENSG00000224613	RNPC3-DT	-	RNPC3 divergent transcript	ncRNA
12411	chr19	55636609	55637108	+	17	NA	Intergenic	L2b|LINE|L2	-4144	NM_207115	51157		NM_016202	ENSG00000213015	ZNF580	-	zinc finger protein 580	protein-coding
12786	chr15	98737772	98738431	+	17	NA	intron (NM_000875, intron 2 of 20)	intron (NM_000875, intron 2 of 20)	-46325	NR_039864	100616432		NR_039864	ENSG00000264480	MIR4714	-	microRNA 4714	ncRNA
7498	chr7	104971319	104972560	+	17	NA	Intergenic	Intergenic	19226	NR_039981	100216546		NR_039981		LINC01004	-	long intergenic non-protein coding RNA 1004	ncRNA
5605-3	chr5	36066253	36067060	+	17	NA	intron (NM_174914, intron 1 of 6)	intron (NM_174914, intron 1 of 6)	226	NM_174914	167127		NM_174914	ENSG00000168671	UGT3A2	-	UDP glycosyltransferase family 3 member A2	protein-coding
19112	chr17	7704790	7705510	+	17	NA	promoter-TSS (NM_001406)	promoter-TSS (NM_001406)	-52	NM_001406	1949		NM_001406	ENSG00000108947	EFNB3	EFL6|EPLG8|LERK8	ephrin B3	protein-coding
7660	chr17	76251934	76252899	+	17	NA	Intergenic	Intergenic	-11923	NM_001330501	114804		NM_052916	ENSG00000141576	RNF157	-	ring finger protein 157	protein-coding
8988	chr8	19757394	19757890	+	17	NA	promoter-TSS (NM_001354487)	promoter-TSS (NM_001354487)	-336	NM_001354489	55790		NM_018371	ENSG00000147408	CSGALNACT1	CSGalNAcT-1|ChGn|ChGn-1|SDJLABA|beta4GalNAcT	chondroitin sulfate N-acetylgalactosaminyltransferase 1	protein-coding
4480-3	chr15	57198760	57199173	+	17	NA	intron (NM_207038, intron 8 of 19)	intron (NM_207038, intron 8 of 19)	-20464	NM_207040	6938		NM_003205	ENSG00000140262	TCF12	CRS3|HEB|HH26|HTF4|HsT17266|TCF-12|bHLHb20|p64	transcription factor 12	protein-coding
10651	chr14_KI270847v1_alt	133742	134106	+	17	NA	intron (NM_001142594, intron 3 of 10).2	intron (NM_001142594, intron 3 of 10).2	17612	NM_001363707	3705		NM_014216	ENSG00000100605	ITPK1	ITRPK1	inositol-tetrakisphosphate 1-kinase	protein-coding
5131-3	chr17	72567104	72568033	+	17	NA	intron (NR_036488, intron 1 of 3)	L2c|LINE|L2	25236	NR_152515	100499467		NR_036488	ENSG00000227036	LINC00673	ERRLR01|HI-LNC75|HILNC75|LUCAIR1|RASON|SLNCR|SLNCR1	long intergenic non-protein coding RNA 673	ncRNA
7788	chr1	62706801	62707119	+	17	NA	Intergenic	AluSx1|SINE|Alu	-18574	NM_001272002	85440		NM_033407	ENSG00000116641	DOCK7	DEE23|EIEE23|ZIR2	dedicator of cytokinesis 7	protein-coding
5073-3	chr8	40162363	40162595	+	17	NA	Intergenic	Intergenic	8997	NM_020130	56892		NM_020130	ENSG00000176907	TCIM	C8orf4|TC-1|TC1	transcriptional and immune response regulator	protein-coding
10278	chr13	94302887	94304452	+	17	NA	intron (NM_005708, intron 5 of 8)	intron (NM_005708, intron 5 of 8)	-115678	NR_046535	100873972		NR_046535	ENSG00000236520	GPC6-AS1	-	GPC6 antisense RNA 1	ncRNA
4001-3	chr11	68099583	68100227	+	17	NA	intron (NM_212469, intron 1 of 10)	intron (NM_212469, intron 1 of 10)	21483	NM_001376219	1119		NM_001277	ENSG00000110721	CHKA	CHK|CK|CKI|EK|NEDMIMS	choline kinase alpha	protein-coding
6350-2	chr22	25448472	25448828	+	17	NA	intron (NR_033734, intron 1 of 4)	intron (NR_033734, intron 1 of 4)	563	NR_033734	1416		NR_033733	ENSG00000291087	CRYBB2P1	CRYB2B	crystallin beta B2 pseudogene 1	pseudo
9765	chr7	1060505	1060773	+	17	NA	intron (NM_032350, intron 2 of 4)	intron (NM_032350, intron 2 of 4)	5269	NM_138445	115330		NM_138445	ENSG00000164849	GPR146	PGR8	G protein-coupled receptor 146	protein-coding
11300	chr5_GL339449v2_alt	999200	999993	+	17	NA	Intergenic	MIRb|SINE|MIR	-1611	NM_001364573	2966		NM_001515	ENSG00000145736	GTF2H2	BTF2|BTF2 p44|BTF2P44|T-BTF2P44|TFIIH|p44	general transcription factor IIH subunit 2	protein-coding
9199	chr3	148553392	148554912	+	17	NA	Intergenic	Intergenic	-143719	NM_004835	185		NM_000685	ENSG00000144891	AGTR1	AG2S|AGTR1B|AT1|AT1AR|AT1B|AT1BR|AT1R|AT2R1|ATR1|HAT1R	angiotensin II receptor type 1	protein-coding
18617	chr8	22621169	22623431	+	17	NA	TTS (NR_033902)	TTS (NR_033902)	17258	NM_001363068	57805		NM_021174	ENSG00000158941	CCAR2	DBC-1|DBC1|KIAA1967|NET35|p30 DBC|p30DBC	cell cycle and apoptosis regulator 2	protein-coding
8759	chr8	24767488	24769133	+	17	NA	Intergenic	Intergenic	-145451	NM_005382	4741		NM_005382	ENSG00000104722	NEFM	NEF3|NF-M|NFM	neurofilament medium chain	protein-coding
6786-3	chr5	160930390	160931217	+	17	NA	TTS (NR_027111)	TTS (NR_027111)	7823	NR_151858	285629		NR_027111	ENSG00000253417	LINC02159	-	long intergenic non-protein coding RNA 2159	ncRNA
4903-2	chr19	44207393	44208020	+	17	NA	Intergenic	Intergenic	-4822	NM_001289171	7770		NM_182490	ENSG00000131115	ZNF227	-	zinc finger protein 227	protein-coding
8727	chr7	101738833	101738833	+	17	NA	Intergenic	AluJb|SINE|Alu	-77174	NM_001913	1523		NM_001913	ENSG00000257923	CUX1	CASP|CDP|CDP/Cut|CDP1|COY1|CUTL1|CUX|Clox|Cux/CDP|GDDI|GOLIM6|Nbla10317|p100|p110|p200|p75	cut like homeobox 1	protein-coding
7472	chr1	148188708	148189689	+	17	NA	Intergenic	LTR5_Hs|LTR|ERVK	26488	NR_135559	100505824		NR_135559	ENSG00000232265	LINC02805	-	long intergenic non-protein coding RNA 2805	ncRNA
10790	chr9	35562699	35562971	+	17	NA	TTS (NM_001135999)	TTS (NM_001135999)	1043	NM_001164310	730112		NM_001099951	ENSG00000215187	CIMIP2B	FAM166B	ciliary microtubule inner protein 2B	protein-coding
3221-11	chr8	144125623	144126063	+	17	NA	Intergenic	CpG	-11931	NM_016458	51236		NM_016458	ENSG00000235173	HGH1	BRP16|BRP16L|C8orf30A|C8orf30B|FAM203A|FAM203B	HGH1 homolog	protein-coding
8644	chr16	67884592	67885375	+	17	NA	promoter-TSS (NM_001348682)	promoter-TSS (NM_001348682)	98	NM_001348682	123904		NM_198443	ENSG00000188038	NRN1L	MRCC2446|UNQ2446|cpg15-2	neuritin 1 like	protein-coding
14080	chr7	90716832	90719681	+	17	NA	intron (NM_001287136, intron 1 of 13)	intron (NM_001287136, intron 1 of 13)	8440	NM_001287137	5218		NM_012395	ENSG00000058091	CDK14	PFTAIRE1|PFTK1	cyclin dependent kinase 14	protein-coding
9069-2	chr18	56565454	56566606	+	17	NA	Intergenic	MIRb|SINE|MIR	72562	NM_004786	9352		NM_004786	ENSG00000091164	TXNL1	HEL-S-114|TRP32|TXL-1|TXNL|Txl	thioredoxin like 1	protein-coding
15234	chr12	49979219	49979815	+	17	NA	Intergenic	Intergenic	6570	NM_001652	363		NM_001652	ENSG00000086159	AQP6	AQP2L|KID	aquaporin 6	protein-coding
3863-6	chr4	21231729	21232233	+	17	NA	intron (NM_147182, intron 2 of 8)	intron (NM_147182, intron 2 of 8)	71925	NM_147183	80333		NM_025221	ENSG00000185774	KCNIP4	CALP|KCHIP4	potassium voltage-gated channel interacting protein 4	protein-coding
20873	chr15	92915782	92916807	+	17	NA	intron (NM_001042572, intron 2 of 12)	MER4A1_|LTR|ERV1	11895	NR_036136	100422995		NR_036136	ENSG00000284324	MIR3175	mir-3175	microRNA 3175	ncRNA
3179	chr17	25389774	25390213	+	17	NA	Intergenic	ALR/Alpha|Satellite|centr	1699248	NR_135673	105371703		NR_135673		LOC105371703	-	uncharacterized LOC105371703	ncRNA
4841	chr12	70756577	70757239	+	17	NA	intron (NM_002849, intron 4 of 13)	intron (NM_002849, intron 4 of 13)	-2149	NM_001207016	5801		NM_002849	ENSG00000153233	PTPRR	EC-PTP|PCPTP1|PTP-SL|PTPBR7|PTPRQ	protein tyrosine phosphatase receptor type R	protein-coding
8411-7	chr4	25081507	25082644	+	17	NA	Intergenic	LTR40c|LTR|ERVL	-51129	NM_018176	55203		NM_018176	ENSG00000153012	LGI2	LGIL2	leucine rich repeat LGI family member 2	protein-coding
3078-4	chr19	49142812	49143256	+	17	NA	intron (NR_103842, intron 20 of 28)	CpG	12362	NM_002152	3270		NM_002152	ENSG00000130528	HRC	-	histidine rich calcium binding protein	protein-coding
9234	chr8	122686574	122687599	+	17	NA	intron (NR_126348, intron 2 of 3)	Charlie15a|DNA|hAT-Charlie	7020	NR_126348	104266958		NR_126348		LINC01151	-	long intergenic non-protein coding RNA 1151	ncRNA
7960	chr18	44711673	44712551	+	17	NA	intron (NM_001130110, intron 2 of 3)	intron (NM_001130110, intron 2 of 3)	11237	NM_001379142	26040		NM_015559	ENSG00000152217	SETBP1	MRD29|SEB	SET binding protein 1	protein-coding
12861	chr2	218283843	218283914	+	17	NA	intron (NM_022152, intron 1 of 11)	intron (NM_022152, intron 1 of 11)	2971	NM_001321427	64114		NM_022152	ENSG00000135926	TMBIM1	LFG3|MST100|MSTP100|PP1201|RECS1	transmembrane BAX inhibitor motif containing 1	protein-coding
6160-2	chr7	43904839	43905677	+	17	NA	intron (NM_001077664, intron 1 of 5)	intron (NM_001077664, intron 1 of 5)	1338	NM_001077663	55665		NM_017920	ENSG00000106608	URGCP	URG4	upregulator of cell proliferation	protein-coding
4276-4	chr6	147204274	147204821	+	17	NA	promoter-TSS (NR_034115)	promoter-TSS (NR_034115)	67	NR_034115	729178		NR_034115	ENSG00000233452	STXBP5-AS1	-	STXBP5 antisense RNA 1	ncRNA
9415	chr10	82469304	82469716	+	17	NA	intron (NM_001370081, intron 2 of 8)	intron (NM_001370081, intron 2 of 8)	-236590	NR_120666	101929590		NR_120666	ENSG00000225738	NRG3-AS1	C10orf100|Em:AC010157.1	NRG3 antisense RNA 1	ncRNA
15156	chr1	26168911	26169337	+	17	NA	promoter-TSS (NM_001364669)	promoter-TSS (NM_001364669)	-161	NM_001364669	110806296		NM_001364667	ENSG00000282872	C1orf232	-	chromosome 1 open reading frame 230	protein-coding
7578-2	chr5	151754934	151755830	+	17	NA	intron (NM_004045, intron 1 of 3)	MIRb|SINE|MIR	3249	NM_004045	475		NM_004045	ENSG00000177556	ATOX1	ATX1|HAH1	antioxidant 1 copper chaperone	protein-coding
15911	chr22	50781905	50782389	+	17	NA	intron (NM_001003789, intron 2 of 8)	intron (NM_001003789, intron 2 of 8)	1489	NM_001350015	11158		NM_007081	ENSG00000079974	RABL2B	-	RAB, member of RAS oncogene family like 2B	protein-coding
7622	chr21	15056804	15058076	+	17	NA	intron (NM_003489, intron 1 of 3)	intron (NM_003489, intron 1 of 3)	7560	NM_003489	8204		NM_003489	ENSG00000180530	NRIP1	CAKUT3|RIP140	nuclear receptor interacting protein 1	protein-coding
8547	chr11	61758252	61758342	+	17	NA	promoter-TSS (NR_026882)	promoter-TSS (NR_026882)	-633	NR_026882	26070		NR_026882	ENSG00000124915	MYRF-AS1	DKFZP434K028	MYRF antisense RNA 1	ncRNA
24839	chr3	193868184	193868616	+	17	NA	Intergenic	Intergenic	-24391	NR_146718	105374285		NR_146718		LINC02038	-	long intergenic non-protein coding RNA 2038	ncRNA
4169	chr11	14969615	14970288	+	17	NA	exon (NM_001033953, exon 3 of 5)	exon (NM_001033953, exon 3 of 5)	2400	NM_001033953	796		NM_001741	ENSG00000110680	CALCA	CALC1|CGRP|CGRP-I|CGRP-alpha|CGRP1|CT|KC|PCT	calcitonin related polypeptide alpha	protein-coding
12459	chr19	5830079	5830465	+	17	NA	TTS (NM_001381959)	TTS (NM_001381959)	8520	NM_001381955	2528		NM_000150	ENSG00000156413	FUT6	FCT3A|FT1A|Fuc-TVI|FucT-VI	fucosyltransferase 6	protein-coding
12097	chr12	47086679	47087730	+	17	NA	intron (NM_138371, intron 1 of 3)	intron (NM_138371, intron 1 of 3)	-7245	NM_001370299	347902		NM_181847	ENSG00000139211	AMIGO2	ALI1|AMIGO-2|DEGA	adhesion molecule with Ig like domain 2	protein-coding
23999	chr12	6770176	6770791	+	17	NA	3' UTR (NM_002824, exon 5 of 5)	3' UTR (NM_002824, exon 5 of 5)	-2037	NM_002286	3902		NM_002286	ENSG00000089692	LAG3	CD223	lymphocyte activating 3	protein-coding
5176-2	chr1	228433489	228433918	+	17	NA	Intergenic	L1MCb|LINE|L1	-8343	NM_003493	8290		NM_003493	ENSG00000168148	H3-4	H3.4|H3/g|H3C16|H3FT|H3t|HIST3H3	H3.4 histone, cluster member	protein-coding
5995	chr5	11511332	11512332	+	17	NA	intron (NM_001332, intron 3 of 21)	intron (NM_001332, intron 3 of 21)	77085	NM_001288715	1501		NM_001332	ENSG00000169862	CTNND2	GT24|NPRAP	catenin delta 2	protein-coding
5129-2	chr4	78622372	78623123	+	17	NA	Intergenic	Intergenic	-23247	NR_038304	100505702		NR_038303		LINC01094	CTEPHA1	long intergenic non-protein coding RNA 1094	ncRNA
2968-3	chr4	30756987	30757827	+	16	NA	intron (NM_032457, intron 1 of 2)	L2b|LINE|L2	37038	NM_032457	5099		NM_002589	ENSG00000169851	PCDH7	BH-Pcdh|BHPCDH|PPP1R120	protocadherin 7	protein-coding
11669	chr11	107858053	107859419	+	16	NA	promoter-TSS (NM_017515)	promoter-TSS (NM_017515)	51	NM_017515	54733		NM_017515	ENSG00000110660	SLC35F2	HSNOV1	solute carrier family 35 member F2	protein-coding
5136-2	chr13	30865041	30865526	+	16	NA	Intergenic	Intergenic	-17279	NR_103813	440132		NR_103813	ENSG00000236094	LINC00545	-	long intergenic non-protein coding RNA 545	ncRNA
7794	chr1	219236775	219237766	+	16	NA	Intergenic	Intergenic	62301	NM_001300772	127018		NM_138794	ENSG00000143353	LYPLAL1	Q96AV0	lysophospholipase like 1	protein-coding
7265	chr6	104940706	104941465	+	16	NA	promoter-TSS (NR_046407)	promoter-TSS (NR_046407)	-558	NR_046407	100113403		NR_046407	ENSG00000203809	LIN28B-AS1	C6orf220|LINC00577|dJ439I14.1	LIN28B antisense RNA 1	ncRNA
5551-2	chr4	68871748	68872818	+	16	NA	Intergenic	MER4B-int|LTR|ERV1	56289	NM_001144767	7365		NM_001075	ENSG00000109181	UGT2B10	UDPGT2B10	UDP glucuronosyltransferase family 2 member B10	protein-coding
4234	chr21	43585796	43586391	+	16	NA	intron (NM_007031, intron 8 of 8)	intron (NM_007031, intron 8 of 8)	20911	NM_017445	54145		NM_017445	ENSG00000234289	H2BC12L	H2B/s|H2BFS|H2BS1	H2B clustered histone 12 like	protein-coding
4216-6	chr8	100720526	100721183	+	16	NA	intron (NM_002568, intron 1 of 14)	intron (NM_002568, intron 1 of 14)	1234	NM_002568	26986		NM_002568	ENSG00000070756	PABPC1	PAB1|PABP|PABP1|PABPC2|PABPL1	poly(A) binding protein cytoplasmic 1	protein-coding
5834	chr10	110077462	110078349	+	16	NA	intron (NM_016824, intron 1 of 14)	intron (NM_016824, intron 1 of 14)	-69524	NR_038943	100505933		NR_038943	ENSG00000203876	ADD3-AS1	-	ADD3 antisense RNA 1	ncRNA
7328	chr6	78132063	78133225	+	16	NA	Intergenic	LTR22E|LTR|ERVK	406665	NR_162115	113218491		NR_162115		MIR10524	-	microRNA 10524	ncRNA
2862-2	chr14	81231627	81231851	+	16	NA	Intergenic	ERVL-B4-int|LTR|ERVL	-10349	NM_201595	2957		NM_015859	ENSG00000165417	GTF2A1	TF2A1|TFIIA|TFIIA-42|TFIIAL	general transcription factor IIA subunit 1	protein-coding
6740-2	chr3	11610095	11610932	+	16	NA	intron (NM_014667, intron 2 of 5)	intron (NM_014667, intron 2 of 5)	-5932	NM_001284391	9686		NM_014667	ENSG00000144560	VGLL4	VGL-4	vestigial like family member 4	protein-coding
5135	chr5	79259257	79259312	+	16	NA	intron (NM_152405, intron 1 of 10)	MER52D|LTR|ERV1	23153	NM_152405	133746		NM_152405	ENSG00000152409	JMY	WHAMM2|WHDC1L3	junction mediating and regulatory protein, p53 cofactor	protein-coding
16893	chr8	139843369	139843405	+	16	NA	intron (NR_164662, intron 20 of 22)	intron (NR_164662, intron 20 of 22)	-140264	NR_104210	51305		NM_001282534	ENSG00000169427	KCNK9	BIBARS|K2p9.1|KT3.2|TASK-3|TASK3|TASK32	potassium two pore domain channel subfamily K member 9	protein-coding
6121	chr7	30281681	30282493	+	16	NA	intron (NR_136267, intron 1 of 3)	MER112|DNA|hAT-Charlie	-2510	NM_147128	223082		NM_147128	ENSG00000180233	ZNRF2	RNF202	zinc and ring finger 2	protein-coding
3991-3	chr17	58415238	58415975	+	16	NA	5' UTR (NM_001305544, exon 2 of 10)	5' UTR (NM_001305544, exon 2 of 10)	1928	NM_001305544	54894		NM_017763	ENSG00000108375	RNF43	RNF124|SSPCS|URCC	ring finger protein 43	protein-coding
4434	chr19	48738361	48738896	+	16	NA	intron (NM_017805, intron 3 of 11)	intron (NM_017805, intron 3 of 11)	1982	NM_017805	54922		NM_017805	ENSG00000105538	RASIP1	RAIN	Ras interacting protein 1	protein-coding
10061	chr6	143535217	143535473	+	16	NA	Intergenic	Intergenic	-23625	NM_032020	2519		NM_032020	ENSG00000001036	FUCA2	dJ20N2.5	alpha-L-fucosidase 2	protein-coding
5505-4	chr6	136136940	136137863	+	16	NA	intron (NM_018945, intron 3 of 12)	intron (NM_018945, intron 3 of 12)	-64574	NR_149042	644135		NR_149042	ENSG00000237596	PDE7B-AS1	-	PDE7B antisense RNA 1	ncRNA
4453	chr11	94144005	94144569	+	16	NA	intron (NM_015368, intron 1 of 4)	Plat_L3|LINE|CR1	15446	NM_015368	24145		NM_015368	ENSG00000110218	PANX1	MRS1|OOMD7|OZEMA7|PX1|UNQ2529	pannexin 1	protein-coding
13340	chr12	51978100	51978368	+	16	NA	intron (NM_020327, intron 3 of 8)	intron (NM_020327, intron 3 of 8)	24854	NM_020327	91		NM_004302	ENSG00000135503	ACVR1B	ACTRIB|ACVRLK4|ALK4|SKR2	activin A receptor type 1B	protein-coding
6002	chr7	126436333	126436943	+	16	NA	Intergenic	Intergenic	621546	NR_030323	693177		NR_030323	ENSG00000207692	MIR592	MIRN592|hsa-mir-592|mir-592	microRNA 592	ncRNA
3646	chr1	204398306	204398754	+	16	NA	Intergenic	Intergenic	13287	NM_032833	84919		NM_032833	ENSG00000158615	PPP1R15B	CREP|MSSGM2	protein phosphatase 1 regulatory subunit 15B	protein-coding
7216-2	chr2	232873873	232874643	+	16	NA	intron (NM_206895, intron 2 of 3)	L1MC4|LINE|L1	-1170	NM_001346121	389084		NM_206895	ENSG00000182600	SNORC	ASCL830|C2orf82|UNQ830	secondary ossification center associated regulator of chondrocyte maturation	protein-coding
8078	chr7	2108022	2108197	+	16	NA	intron (NM_001304524, intron 9 of 16)	intron (NM_001304524, intron 9 of 16)	-19057	NR_145797	109623488		NR_145797		SNORA114	-	small nucleolar RNA, H/ACA box 114	snoRNA
5244	chr1	222465223	222465959	+	16	NA	Intergenic	CpG	82513	NM_024746	79802		NM_024746	ENSG00000143512	HHIPL2	KIAA1822L	HHIP like 2	protein-coding
17662	chr11	408808	409436	+	16	NA	intron (NM_021805, intron 2 of 9)	intron (NM_021805, intron 2 of 9)	5877	NM_001135054	59307		NM_021805	ENSG00000185187	SIGIRR	IL-1R8|TIR8	single Ig and TIR domain containing	protein-coding
3796-2	chr2	180763380	180763874	+	16	NA	intron (NR_104324, intron 3 of 4)	intron (NR_104324, intron 3 of 4)	71523	NR_104324	101669767		NR_104319	ENSG00000281131	SCHLAP1	LINC00913|PCAT11|PCAT114	SWI/SNF complex antagonist associated with prostate cancer 1	ncRNA
4902-2	chr11	13012107	13012668	+	16	NA	TTS (NM_001080521)	TTS (NM_001080521)	3071	NM_001080521	644943		NM_001080521	ENSG00000189431	RASSF10	-	Ras association domain family member 10	protein-coding
3549-10	chr5	16588379	16589249	+	16	NA	intron (NM_001034850, intron 1 of 8)	intron (NM_001034850, intron 1 of 8)	-27112	NR_109946	101929524		NR_109946	ENSG00000246214	RETREG1-AS1	-	RETREG1 antisense RNA 1	ncRNA
8690	chr11	62559620	62559958	+	16	NA	TTS (NR_037427)	TTS (NR_037427)	517	NR_037427	100500804		NR_037427	ENSG00000284135	MIR3654	-	microRNA 3654	ncRNA
11201	chr3	58067536	58067557	+	16	NA	intron (NM_001164319, intron 1 of 44)	intron (NM_001164319, intron 1 of 44)	59124	NM_001164319	2317		NM_001457	ENSG00000136068	FLNB	ABP-278|ABP-280|AOI|FH1|FLN-B|FLN1L|LRS1|SCT|TABP|TAP	filamin B	protein-coding
14879	chr16	4329952	4330713	+	16	NA	intron (NM_001318918, intron 2 of 7).2	intron (NM_001318918, intron 2 of 7).2	-1992	NR_110901	101926896		NR_110901	ENSG00000262686	GLIS2-AS1	-	GLIS2 antisense RNA 1	ncRNA
10787-2	chr10	29728360	29729714	+	16	NA	intron (NM_001323599, intron 1 of 38)	intron (NM_001323599, intron 1 of 38)	6764	NM_003174	6840		NM_003174	ENSG00000197321	SVIL	MFM10	supervillin	protein-coding
5515	chr2	203579127	203579536	+	16	NA	Intergenic	Intergenic	-44030	NM_001329728	65059		NM_025252	ENSG00000173166	RAPH1	ALS2CR18|ALS2CR9|LPD|PREL-2|PREL2|RMO1|RalGDS/AF-6	Ras association (RalGDS/AF-6) and pleckstrin homology domains 1	protein-coding
10787	chr10	29727839	29728235	+	16	NA	intron (NM_001323599, intron 1 of 38)	intron (NM_001323599, intron 1 of 38)	7764	NM_003174	6840		NM_003174	ENSG00000197321	SVIL	MFM10	supervillin	protein-coding
6758	chr1	66271135	66272247	+	16	NA	intron (NM_001037340, intron 5 of 14)	intron (NM_001037340, intron 5 of 14)	-60417	NM_001037339	5142		NM_002600	ENSG00000184588	PDE4B	DPDE4|PDEIVB	phosphodiesterase 4B	protein-coding
12339	chr20	47316745	47316864	+	16	NA	intron (NM_001281781, intron 2 of 20)	AluSx|SINE|Alu	-1698	NR_024594	100131496		NR_024594	ENSG00000267882	LOC100131496	-	uncharacterized LOC100131496	ncRNA
6656	chr15	67967906	67968682	+	16	NA	Intergenic	Intergenic	-86021	NM_016166	8554		NM_016166	ENSG00000033800	PIAS1	DDXBP1|GBP|GU/RH-II|ZMIZ3	protein inhibitor of activated STAT 1	protein-coding
3856-3	chr2	12167364	12167903	+	16	NA	intron (NR_110196, intron 3 of 5)	intron (NR_110196, intron 3 of 5)	-31497	NR_037452	100500884		NR_037452	ENSG00000264089	MIR3681	-	microRNA 3681	ncRNA
4922-2	chr6	52640159	52640813	+	16	NA	Intergenic	Intergenic	-23915	NR_024403	730101		NR_024403	ENSG00000291006	LOC730101	-	uncharacterized LOC730101	ncRNA
5006-2	chr16	84144954	84145538	+	16	NA	promoter-TSS (NM_031463)	promoter-TSS (NM_031463)	-51	NM_001146051	83693		NM_031463	ENSG00000103160	HSDL1	SDR12C3	hydroxysteroid dehydrogenase like 1	protein-coding
8949	chr10	43397917	43399827	+	16	NA	intron (NM_001098204, intron 1 of 3)	intron (NM_001098204, intron 1 of 3)	-1526	NM_001098207	3185		NM_004966	ENSG00000169813	HNRNPF	HNRPF|OK/SW-cl.23|mcs94-1	heterogeneous nuclear ribonucleoprotein F	protein-coding
19468	chr12	56188362	56189509	+	16	NA	intron (NM_003075, intron 1 of 27)	CpG	548	NM_001330288	6601		NM_003075	ENSG00000139613	SMARCC2	BAF170|CRACC2|CSS8|Rsc8	SWI/SNF related, matrix associated, actin dependent regulator of chromatin subfamily c member 2	protein-coding
8855	chr12	6507089	6508278	+	16	NA	intron (NM_014865, intron 2 of 31)	LTR10D|LTR|ERV1	-2539	NR_004387	692148		NR_004387	ENSG00000239002	SCARNA10	MBI|U85|lnc	small Cajal body-specific RNA 10	ncRNA
15836	chr22	20115074	20115402	+	16	NA	promoter-TSS (NM_001278639)	promoter-TSS (NM_001278639)	-487	NR_106874	102465490		NR_106874	ENSG00000278278	MIR6816	hsa-mir-6816	microRNA 6816	ncRNA
3609	chr17	45620024	45620557	+	16	NA	promoter-TSS (NM_001256299).3	promoter-TSS (NM_001256299).3	-39	NR_138258	147081		NM_152466	ENSG00000293460	LINC02210	C17orf69|CRHR1-IT1	long intergenic non-protein coding RNA 2210	ncRNA
6776-2	chr3	128343669	128344251	+	16	NA	intron (NM_021937, intron 5 of 6)	intron (NM_021937, intron 5 of 6)	-119634	NR_037890	285224		NR_037890	ENSG00000242049	DNAJB8-AS1	-	DNAJB8 antisense RNA 1	ncRNA
5440-2	chr21	41024228	41025192	+	16	NA	Intergenic	Intergenic	123354	NR_024100	284835		NR_024100	ENSG00000226496	LINC00323	C21orf130|NCRNA00323|PRED42	long intergenic non-protein coding RNA 323	ncRNA
8263	chr7	108433460	108433999	+	16	NA	intron (NM_001371128, intron 1 of 31)	MSTB1|LTR|ERVL-MaLR	22668	NM_005010	4897		NM_005010	ENSG00000091129	NRCAM	NEDNMS	neuronal cell adhesion molecule	protein-coding
9487-2	chr4	1047418	1048313	+	16	NA	Intergenic	Intergenic	35401	NM_021923	53834		NM_017862	ENSG00000127418	FGFRL1	FGFR-5|FGFR5|FHFR	fibroblast growth factor receptor like 1	protein-coding
6023-3	chr6	111255230	111256006	+	16	NA	Intergenic	LTR5_Hs|LTR|ERVK	-3721	NM_153369	91749		NM_153369	ENSG00000173214	MFSD4B	KIAA1919|NaGLT1|SLC60A2	major facilitator superfamily domain containing 4B	protein-coding
4527-2	chr2	231601531	231602007	+	16	NA	Intergenic	Intergenic	8905	NM_152614	165100		NM_152614	ENSG00000177673	TEX44	C2orf57	testis expressed 44	protein-coding
6996	chr19_GL949752v1_alt	353537	354655	+	16	NA	promoter-TSS (NM_001375640)	promoter-TSS (NM_001375640)	211	NM_052925	114823		NM_052925	ENSG00000167615	LENG8	pp13842	leukocyte receptor cluster member 8	protein-coding
11086	chr15	57507633	57508254	+	16	NA	intron (NM_001252335, intron 9 of 19)	MIR3|SINE|MIR	-83961	NR_104371	145781		NM_001018090	ENSG00000137878	GCOM1	GRINL1A|Gcom2|MYZAP|MYZAP-POLR2M|gcom	GCOM1, MYZAP-POLR2M combined locus	protein-coding
8319	chr12	15628108	15628941	+	16	NA	intron (NM_004447, intron 18 of 20)	intron (NM_004447, intron 18 of 20)	81913	NM_030671	5800		NM_002848	ENSG00000151490	PTPRO	GLEPP1|NPHS6|PTP-OC|PTP-U2|PTPROT|PTPU2|R-PTP-O	protein tyrosine phosphatase receptor type O	protein-coding
10006	chr9	19201934	19202981	+	16	NA	Intergenic	Intergenic	-28236	NM_001330640	55667		NM_017925	ENSG00000137145	DENND4C	C9orf55|C9orf55B|RAB10GEF|bA513M16.3	DENN domain containing 4C	protein-coding
7000-2	chr5	14455875	14457009	+	16	NA	intron (NR_134469, intron 34 of 56)	intron (NR_134469, intron 34 of 56)	-7541	NR_145815	109623458		NR_145815		SNORD170	-	small nucleolar RNA, C/D box 170	snoRNA
7933-2	chr5	72556714	72557331	+	16	NA	promoter-TSS (NR_105008)	promoter-TSS (NR_105008)	-55	NR_105008	102503427		NR_105008		LOC102503427	-	uncharacterized LOC102503427	ncRNA
7390	chr7	47610014	47610346	+	16	NA	Intergenic	Intergenic	-11759	NR_108090	101929086		NR_108090	ENSG00000236078	LINC01447	-	long intergenic non-protein coding RNA 1447	ncRNA
6148	chr22	22781119	22782149	+	16	NA	Intergenic	Intergenic	-41142	NR_030755	723778		NR_030755	ENSG00000284049	MIR650	MIRN650|hsa-mir-650	microRNA 650	ncRNA
6648	chr17	19766261	19767435	+	16	NA	Intergenic	Intergenic	-18550	NM_001330150	218		NM_000691	ENSG00000108602	ALDH3A1	ALDH3|ALDHIII	aldehyde dehydrogenase 3 family member A1	protein-coding
5305-2	chr3	185253836	185254423	+	16	NA	promoter-TSS (NR_106712)	promoter-TSS (NR_106712)	-80	NM_001966	1962		NM_001966	ENSG00000113790	EHHADH	ECHD|FRTS3|L-PBE|LBFP|LBP|MFE1|PBFE	enoyl-CoA hydratase and 3-hydroxyacyl CoA dehydrogenase	protein-coding
10687	chr1	40823987	40825769	+	16	NA	intron (NM_004700, intron 9 of 13)	intron (NM_004700, intron 9 of 13)	37485	NM_133467	163732		NM_133467	ENSG00000179862	CITED4	-	Cbp/p300 interacting transactivator with Glu/Asp rich carboxy-terminal domain 4	protein-coding
5220	chr11	102119786	102120614	+	16	NA	intron (NM_001130145, intron 2 of 8)	intron (NM_001130145, intron 2 of 8)	7752	NM_001195045	10413		NM_006106	ENSG00000137693	YAP1	COB1|YAP|YAP-1|YAP2|YAP65|YKI	Yes1 associated transcriptional regulator	protein-coding
6463-2	chr5	168885127	168885846	+	16	NA	intron (NM_003062, intron 4 of 35)	intron (NM_003062, intron 4 of 35)	-117231	NR_029632	407001		NR_029632	ENSG00000207739	MIR218-2	MIRN218-2|mir-218-2	microRNA 218-2	ncRNA
8086	chr16	10990472	10990481	+	16	NA	intron (NM_001243403, intron 9 of 20)	intron (NM_001243403, intron 9 of 20)	45912	NM_015226	23274		NM_015226	ENSG00000038532	CLEC16A	Gop-1|KIAA0350	C-type lectin domain containing 16A	protein-coding
6776-3	chr6	33623786	33624313	+	16	NA	intron (NM_002224, intron 1 of 57)	L2c|LINE|L2	2727	NM_002224	3710		NM_002224	ENSG00000096433	ITPR3	CMT1J|IP3R|IP3R3	inositol 1,4,5-trisphosphate receptor type 3	protein-coding
7019	chr10	109974000	109974049	+	16	NA	intron (NR_038943, intron 2 of 4)	AluY|SINE|Alu	-22349	NM_001320591	120		NM_001121	ENSG00000148700	ADD3	ADDL|CPSQ3	adducin 3	protein-coding
14530	chr8	19012687	19013006	+	16	NA	intron (NM_015310, intron 1 of 15)	intron (NM_015310, intron 1 of 15)	857	NM_015310	23362		NM_015310	ENSG00000156011	PSD3	EFA6D|EFA6R|HCA67	pleckstrin and Sec7 domain containing 3	protein-coding
8041	chr12	106248177	106249150	+	16	NA	promoter-TSS (NM_006825)	promoter-TSS (NM_006825)	-643	NM_006825	10970		NM_006825	ENSG00000136026	CKAP4	CLIMP-63|CLIMP63|ERGIC-63|p63	cytoskeleton associated protein 4	protein-coding
8144	chr9	107227751	107228159	+	16	NA	Intergenic	Intergenic	-55324	NM_002874	5887		NM_002874	ENSG00000119318	RAD23B	HHR23B|HR23B|P58	RAD23 homolog B, nucleotide excision repair protein	protein-coding
7133	chrX	155070657	155071172	+	16	NA	promoter-TSS (NM_024332)	promoter-TSS (NM_024332)	222	NM_001018024	100272147		NM_001018024	ENSG00000182712	CMC4	C6.1B|MTCP1|MTCP1B|MTCP1NB|p8|p8MTCP1	C-X9-C motif containing 4	protein-coding
3076-3	chr12	85821641	85822109	+	16	NA	intron (NM_005447, intron 1 of 1)	intron (NM_005447, intron 1 of 1)	14534	NM_005447	9182		NM_005447	ENSG00000198774	RASSF9	P-CIP1|PAMCI|PCIP1	Ras association domain family member 9	protein-coding
8082-2	chrUn_KI270754v1	36033	36360	+	16	NA	NA	SST1|Satellite|centr	NA	NA
4482	chr1	1883350	1883838	+	16	NA	intron (NM_001282538, intron 1 of 9)	MIR|SINE|MIR	7493	NM_002074	2782		NM_002074	ENSG00000078369	GNB1	HG2A|MDS|MRD42	G protein subunit beta 1	protein-coding
5682-2	chrX	24190442	24191226	+	16	NA	intron (NM_001330327, intron 6 of 10)	MIRb|SINE|MIR	41105	NM_001178084	7543		NM_003410	ENSG00000005889	ZFX	MRXS37|ZNF926	zinc finger protein X-linked	protein-coding
3887-3	chr5	73996222	73996618	+	16	NA	Intergenic	Intergenic	182874	NM_001244364	64283		NM_022448	ENSG00000214944	ARHGEF28	RGNEF|RIP2|p190RHOGEF	Rho guanine nucleotide exchange factor 28	protein-coding
9504	chr14	63204014	63205299	+	16	NA	5' UTR (NM_020663, exon 1 of 5)	5' UTR (NM_020663, exon 1 of 5)	213	NM_020663	57381		NM_020663	ENSG00000126785	RHOJ	ARHJ|RASL7B|TC10B|TCL	ras homolog family member J	protein-coding
11170	chr19	41421870	41422596	+	16	NA	exon (NM_000709, exon 6 of 9)	exon (NM_000709, exon 6 of 9)	5760	NM_001385648	374907		NM_198540	ENSG00000177191	B3GNT8	B3GALT7|BGALT15|beta3Gn-T8	UDP-GlcNAc:betaGal beta-1,3-N-acetylglucosaminyltransferase 8	protein-coding
6459-3	chr18	54764954	54764965	+	16	NA	intron (NM_001375327, intron 2 of 6)	intron (NM_001375327, intron 2 of 6)	47102	NM_001375327	5874		NM_004163	ENSG00000041353	RAB27B	C25KG	RAB27B, member RAS oncogene family	protein-coding
7665	chr5	147836506	147836814	+	16	NA	intron (NM_001354966, intron 1 of 4)	intron (NM_001354966, intron 1 of 4)	2536	NM_003122	6690		NM_003122	ENSG00000164266	SPINK1	PCTT|PSTI|Spink3|TATI|TCP	serine peptidase inhibitor Kazal type 1	protein-coding
5651-3	chr6	35487597	35487696	+	16	NA	intron (NM_003214, intron 1 of 12)	AluSz|SINE|Alu	9433	NM_003214	7005		NM_003214	ENSG00000007866	TEAD3	DTEF-1|ETFR-1|TEAD-3|TEAD5|TEF-5|TEF5	TEA domain transcription factor 3	protein-coding
6459-2	chr18	54763469	54764231	+	16	NA	intron (NM_001375327, intron 2 of 6)	intron (NM_001375327, intron 2 of 6)	45993	NM_001375327	5874		NM_004163	ENSG00000041353	RAB27B	C25KG	RAB27B, member RAS oncogene family	protein-coding
6840	chr8	115586300	115587712	+	16	NA	exon (NM_001330599, exon 4 of 6)	exon (NM_001330599, exon 4 of 6)	81007	NM_001282902	7227		NM_014112	ENSG00000104447	TRPS1	GC79|LGCR	transcriptional repressor GATA binding 1	protein-coding
3726-7	chr9	69223270	69223314	+	16	NA	intron (NM_004817, intron 5 of 22)	(GTTTT)n|Simple_repeat|Simple_repeat	18137	NM_001369874	9414		NM_004817	ENSG00000119139	TJP2	C9DUPq21.11|DFNA51|DUP9q21.11|FHCA1|PFIC4|X104|ZO2	tight junction protein 2	protein-coding
13123	chr12	65958471	65959426	+	16	NA	intron (NM_003483, intron 4 of 4)	intron (NM_003483, intron 4 of 4)	64778	NR_106722	102464827		NR_106722	ENSG00000276878	MIR6074	hsa-mir-6074	microRNA 6074	ncRNA
6141	chr10	73871360	73871420	+	16	NA	intron (NR_160045, intron 1 of 17)	intron (NR_160045, intron 1 of 17)	3165	NM_001367526	818		NM_001222	ENSG00000148660	CAMK2G	CAMK|CAMK-II|CAMKG|MRD59	calcium/calmodulin dependent protein kinase II gamma	protein-coding
6059	chr6	73309453	73310491	+	16	NA	5' UTR (NM_001251874, exon 1 of 5)	5' UTR (NM_001251874, exon 1 of 5)	187	NM_001251874	80759		NM_030568	ENSG00000135314	KHDC1	C6orf147|C6orf148|Em:AC019205.8|NDG1|bA257K9.4	KH domain containing 1	protein-coding
11309	chr4	139843675	139844177	+	16	NA	intron (NM_018717, intron 2 of 4)	intron (NM_018717, intron 2 of 4)	178107	NM_002413	4258		NM_002413	ENSG00000085871	MGST2	GST2|MGST-II	microsomal glutathione S-transferase 2	protein-coding
11566	chr10	126081881	126082302	+	16	NA	intron (NM_021641, intron 11 of 18)	intron (NM_021641, intron 11 of 18)	-108818	NR_102707	101410540		NR_102707	ENSG00000233409	FANK1-AS1	-	FANK1 antisense RNA 1	ncRNA
14831	chr17	75635208	75635694	+	16	NA	intron (NM_001162995, intron 1 of 2)	intron (NM_001162995, intron 1 of 2)	-1144	NR_028439	643008		NM_001162995	ENSG00000204323	SMIM5	C17orf109|PP12104	small integral membrane protein 5	protein-coding
7228	chr15	90955758	90955783	+	16	NA	intron (NM_001017919, intron 1 of 7)	intron (NM_001017919, intron 1 of 7)	894	NM_001017919	91433		NM_033544	ENSG00000166965	RCCD1	-	RCC1 domain containing 1	protein-coding
10757	chr17	79831036	79832509	+	16	NA	Intergenic	Intergenic	7668	NM_003655	8535		NM_003655	ENSG00000141582	CBX4	NBP16|PC2	chromobox 4	protein-coding
4412-5	chr6	71404520	71404953	+	16	NA	Intergenic	Intergenic	-1115	NR_029504	407029		NR_029504	ENSG00000207827	MIR30A	MIRN30A|mir-30a	microRNA 30a	ncRNA
8894	chr8	40461034	40462677	+	16	NA	Intergenic	Intergenic	-118492	NR_156738	112543493		NR_156738	ENSG00000253802	SIRLNT	lncRNA-PRLB	SIRT1 regulating lncRNA tumor promoter	ncRNA
3442-6	chr21	34365506	34366177	+	16	NA	intron (NM_172201, intron 1 of 1)	intron (NM_172201, intron 1 of 1)	1835	NM_172201	9992		NM_005136	ENSG00000159197	KCNE2	ATFB4|LQT5|LQT6|MIRP1	potassium voltage-gated channel subfamily E regulatory subunit 2	protein-coding
10003	chr17	73642947	73643724	+	16	NA	intron (NM_001144952, intron 1 of 44)	CpG	1110	NM_001144952	54549		NM_019064	ENSG00000069188	SDK2	-	sidekick cell adhesion molecule 2	protein-coding
8117-2	chr6	167349847	167350404	+	16	NA	Intergenic	Intergenic	25039	NM_031949	83887		NM_031949	ENSG00000120440	TTLL2	C6orf104|NYD-TSPG|dJ366N23.3	tubulin tyrosine ligase like 2	protein-coding
5583-3	chr2	99851524	99852457	+	16	NA	intron (NM_001025108, intron 6 of 23)	intron (NM_001025108, intron 6 of 23)	253593	NM_001025108	3899		NM_002285	ENSG00000144218	AFF3	KINS|LAF4|MLLT2-like	ALF transcription elongation factor 3	protein-coding
3436-5	chr6	146946020	146946517	+	16	NA	intron (NR_034115, intron 7 of 10)	intron (NR_034115, intron 7 of 10)	-142444	NR_003954	729176		NR_003954		KATNBL1P6	-	katanin regulatory subunit B1 like 1 pseudogene 6	pseudo
33841	chr10	71973627	71974013	+	16	NA	intron (NM_004273, intron 1 of 2)	intron (NM_004273, intron 1 of 2)	9425	NM_004273	9469		NM_004273	ENSG00000122863	CHST3	C6ST|C6ST1|HSD	carbohydrate sulfotransferase 3	protein-coding
7434	chr6	36666558	36667691	+	16	NA	Intergenic	Intergenic	8002	NR_109836	101154753		NR_109836	ENSG00000281450	PANDAR	PANDA	promoter of CDKN1A antisense DNA damage activated RNA	ncRNA
4431	chr13	41956158	41956741	+	16	NA	intron (NM_015058, intron 1 of 44)	intron (NM_015058, intron 1 of 44)	4636	NM_001009814	23078		NM_015058	ENSG00000102763	VWA8	KIAA0564|P7BP2|RP97	von Willebrand factor A domain containing 8	protein-coding
9576	chr1	2193563	2194257	+	16	NA	exon (NM_001282673, exon 3 of 4)	exon (NM_001282673, exon 3 of 4)	862	NM_001282673	199990		NM_182533	ENSG00000162585	FAAP20	C1orf86|FP7162	FA core complex associated protein 20	protein-coding
9157	chr10	113132501	113133587	+	16	NA	intron (NM_001349870, intron 1 of 11)	intron (NM_001349870, intron 1 of 11)	3773	NM_001349870	6934		NM_030756	ENSG00000148737	TCF7L2	TCF-4|TCF4	transcription factor 7 like 2	protein-coding
8066-2	chr14_GL000225v1_random	12540	13261	+	16	NA	NA	BSR/Beta|Satellite|Satellite	NA	NA
4681-2	chr5	87872878	87873459	+	16	NA	Intergenic	Intergenic	211126	NR_149089	111082994		NR_149089	ENSG00000249362	LINC02488	CTD-2316B1	long intergenic non-protein coding RNA 2488	ncRNA
7743-2	chr3	146152663	146153901	+	16	NA	intron (NM_182943, intron 1 of 19)	intron (NM_182943, intron 1 of 19)	7902	NM_182943	5352		NM_000935	ENSG00000152952	PLOD2	BRKS2|LH2|TLH	procollagen-lysine,2-oxoglutarate 5-dioxygenase 2	protein-coding
12996	chr19	1854184	1854812	+	16	NA	exon (NM_031918, exon 2 of 2)	exon (NM_031918, exon 2 of 2)	-6015	NM_020695	57455		NM_020695	ENSG00000079313	REXO1	ELOABP1|EloA-BP1|REX1|TCEB3BP1	RNA exonuclease 1 homolog	protein-coding
3561-2	chr6	79076668	79077095	+	16	NA	intron (NM_017934, intron 4 of 39)	intron (NM_017934, intron 4 of 39)	1373	NM_017934	55023		NM_017934	ENSG00000146247	PHIP	BRWD2|CHUJANS|DCAF14|DIDOD|WDR11|ndrp	pleckstrin homology domain interacting protein	protein-coding
4285-4	chr22	45006685	45007444	+	16	NA	intron (NM_001284296, intron 2 of 13)	CpG	1839	NM_001284296	112885		NM_138415	ENSG00000056487	PHF21B	BHC80L|PHF4	PHD finger protein 21B	protein-coding
5215-3	chr7	116671663	116672282	+	16	NA	promoter-TSS (NM_000245)	promoter-TSS (NM_000245)	-224	NM_001324402	4233		NM_000245	ENSG00000105976	MET	AUTS9|DA11|DFNB97|HGFR|RCCP2|c-Met	MET proto-oncogene, receptor tyrosine kinase	protein-coding
8054-2	chr11	12696407	12697133	+	16	NA	intron (NM_021961, intron 2 of 12)	intron (NM_021961, intron 2 of 12)	22349	NM_021961	7003		NM_021961	ENSG00000187079	TEAD1	AA|NTEF-1|REF1|TCF-13|TCF13|TEAD-1|TEF-1	TEA domain transcription factor 1	protein-coding
4718	chr10	41878411	41878474	+	16	NA	Intergenic	(ATGGA)n|Simple_repeat|Simple_repeat	489603	NR_024380	441666		NR_024380	ENSG00000291065	LOC441666	-	zinc finger protein 91 pseudogene	pseudo
8682	chr7	144388737	144389556	+	16	NA	Intergenic	MSTB|LTR|ERVL-MaLR	21081	NM_001080413	135935		NM_001080413	ENSG00000106410	NOBOX	OG-2|OG2|OG2X|POF5|TCAG_12042	NOBOX oogenesis homeobox	protein-coding
6141-2	chr16	2339898	2340329	+	16	NA	promoter-TSS (NR_003574)	promoter-TSS (NR_003574)	615	NM_001089	21		NM_001089	ENSG00000167972	ABCA3	ABC-C|ABC3|EST111653|LBM180|SMDP3	ATP binding cassette subfamily A member 3	protein-coding
8086-2	chr16	10991539	10992315	+	16	NA	intron (NM_001243403, intron 9 of 20)	intron (NM_001243403, intron 9 of 20)	47363	NM_015226	23274		NM_015226	ENSG00000038532	CLEC16A	Gop-1|KIAA0350	C-type lectin domain containing 16A	protein-coding
6661	chr17	10920227	10921045	+	16	NA	Intergenic	Intergenic	-82549	NM_001101387	644139		NM_001101387	ENSG00000233670	PIRT	-	phosphoinositide interacting regulator of transient receptor potential channels	protein-coding
9878	chr16	1096617	1097126	+	16	NA	promoter-TSS (NM_207419)	promoter-TSS (NM_207419)	-627	NM_207419	390664		NM_207419	ENSG00000184471	C1QTNF8	CTRP8|UNQ5829	C1q and TNF related 8	protein-coding
12382	chr21	33651719	33651770	+	16	NA	intron (NM_001331010, intron 1 of 38)	intron (NM_001331010, intron 1 of 38)	9243	NM_001331011	6453		NM_003024	ENSG00000205726	ITSN1	ITSN|SH3D1A|SH3P17	intersectin 1	protein-coding
10003-2	chr17	73644023	73644649	+	16	NA	5' UTR (NM_001144952, exon 1 of 45)	5' UTR (NM_001144952, exon 1 of 45)	109	NM_001144952	54549		NM_019064	ENSG00000069188	SDK2	-	sidekick cell adhesion molecule 2	protein-coding
12331-2	chr13	44244223	44245129	+	16	NA	Intergenic	Intergenic	-48476	NR_107046	102465876		NR_107046	ENSG00000276319	MIR8079	hsa-mir-8079	microRNA 8079	ncRNA
4658-3	chr19	7926198	7926587	+	16	NA	promoter-TSS (NM_206833)	promoter-TSS (NM_206833)	-257	NM_206833	404217		NM_206833	ENSG00000178531	CTXN1	CTXN	cortexin 1	protein-coding
11641-2	chr1	23371977	23372356	+	16	NA	TTS (NR_033690)	TTS (NR_033690)	-2330	NM_001077195	80818		NM_030634	ENSG00000125945	ZNF436	ZNF|Zfp46	zinc finger protein 436	protein-coding
4980-3	chr16	29604611	29605260	+	16	NA	intron (NR_135317, intron 1 of 11)	intron (NR_135317, intron 1 of 11)	-5670	NR_049833	100847041		NR_049833	ENSG00000266758	MIR3680-2	-	microRNA 3680-2	ncRNA
9384	chr4	105555160	105556736	+	16	NA	intron (NM_001242729, intron 1 of 13)	intron (NM_001242729, intron 1 of 13)	3328	NM_017700	54848		NM_017700	ENSG00000236699	ARHGEF38	-	Rho guanine nucleotide exchange factor 38	protein-coding
17001	chr12	11708501	11709158	+	16	NA	intron (NM_001987, intron 1 of 7)	intron (NM_001987, intron 1 of 7)	59155	NM_001987	2120		NM_001987	ENSG00000139083	ETV6	TEL|TEL/ABL|THC5	ETS variant transcription factor 6	protein-coding
6398-2	chr8	13122755	13123499	+	16	NA	intron (NM_182643, intron 5 of 17)	intron (NM_182643, intron 5 of 17)	-6883	NM_001164271	10395		NM_006094	ENSG00000164741	DLC1	ARHGAP7|HP|STARD12|p122-RhoGAP	DLC1 Rho GTPase activating protein	protein-coding
6185-2	chr6	22466392	22467172	+	16	NA	Intergenic	Intergenic	-102784	NM_138574	154150		NM_138574	ENSG00000112273	HDGFL1	HRP-1|Hdgfrp1|PWWP1|dJ309H15.1	HDGF like 1	protein-coding
10229	chr17	74769493	74769549	+	16	NA	TTS (NM_004252)	TTS (NM_004252)	6824	NM_001305087	26151		NM_015654	ENSG00000109065	NAT9	EBSP, hNATL	N-acetyltransferase 9 (putative)	protein-coding
7075	chr16	88758841	88758847	+	16	NA	intron (NM_001142864, intron 1 of 50)	MIRb|SINE|MIR	16077	NR_120387	339059		NR_120387	ENSG00000182376	LOC339059	-	uncharacterized LOC339059	ncRNA
8573	chr1	22263584	22264004	+	16	NA	Intergenic	Intergenic	-2445	NR_039613	100616433		NR_039613	ENSG00000266564	MIR4418	-	microRNA 4418	ncRNA
4457	chr1	226870673	226871421	+	16	NA	intron (NM_012486, intron 1 of 12)	CpG	431	NM_000447	5664		NM_000447	ENSG00000143801	PSEN2	AD3L|AD4|CMD1V|PS2|STM2	presenilin 2	protein-coding
15476-2	chr17	75087032	75087958	+	16	NA	promoter-TSS (NM_001271765)	promoter-TSS (NM_001271765)	-270	NM_001271765	9121		NM_004695	ENSG00000170190	SLC16A5	MCT5|MCT6	solute carrier family 16 member 5	protein-coding
8963	chr9	105417197	105417609	+	16	NA	intron (NM_001330731, intron 15 of 15)	intron (NM_001330731, intron 15 of 15)	-30631	NM_031919	83856		NM_031919	ENSG00000106701	FSD1L	CCDC10|CSDUFD1|FSD1CL|FSD1NL|MIR1	fibronectin type III and SPRY domain containing 1 like	protein-coding
4471-2	chr6	21452259	21452942	+	16	NA	Intergenic	L1MEh|LINE|L1	59292	NR_103790	100874531		NR_103790	ENSG00000280989	LINC00581	linc-MBOAT1-4	long intergenic non-protein coding RNA 581	ncRNA
5378-2	chr4	53119181	53120054	+	16	NA	intron (NM_152540, intron 5 of 8)	intron (NM_152540, intron 5 of 8)	246444	NM_152540	152579		NM_152540	ENSG00000184178	SCFD2	STXBP1L1	sec1 family domain containing 2	protein-coding
6620	chr16	84367779	84368514	+	16	NA	promoter-TSS (NM_001286527)	promoter-TSS (NM_001286527)	-377	NM_001286527	9914		NM_014861	ENSG00000064270	ATP2C2	SPCA2	ATPase secretory pathway Ca2+ transporting 2	protein-coding
6189	chr20	62938381	62939250	+	16	NA	promoter-TSS (NM_033081)	promoter-TSS (NM_033081)	668	NM_017896	54994		NM_017896	ENSG00000101193	GID8	C20orf11|TWA1	GID complex subunit 8 homolog	protein-coding
12581	chr15	66564504	66565057	+	16	NA	non-coding (NR_103739, exon 2 of 9)	non-coding (NR_103739, exon 2 of 9)	1218	NM_207338	197021		NM_207338	ENSG00000188501	LCTL	KLG|KLPH	lactase like	protein-coding
7216	chr2	232872869	232872887	+	16	NA	intron (NM_206895, intron 2 of 3)	intron (NM_206895, intron 2 of 3)	-2550	NM_001346121	389084		NM_206895	ENSG00000182600	SNORC	ASCL830|C2orf82|UNQ830	secondary ossification center associated regulator of chondrocyte maturation	protein-coding
15476	chr17	75088620	75089167	+	16	NA	5' UTR (NM_001369668, exon 1 of 6)	5' UTR (NM_001369668, exon 1 of 6)	939	NM_004695	9121		NM_004695	ENSG00000170190	SLC16A5	MCT5|MCT6	solute carrier family 16 member 5	protein-coding
3158-4	chr10	33277211	33277571	+	16	NA	intron (NM_001244973, intron 2 of 16)	intron (NM_001244973, intron 2 of 16)	57276	NM_001244972	8829		NM_003873	ENSG00000099250	NRP1	BDCA4|CD304|NP1|NRP|VEGF165R	neuropilin 1	protein-coding
4969-5	chr6	150717362	150717680	+	16	NA	intron (NM_001329800, intron 1 of 15)	intron (NM_001329800, intron 1 of 15)	-3578	NM_001329806	57480		NM_001029884	ENSG00000120278	PLEKHG1	ARHGEF41	pleckstrin homology and RhoGEF domain containing G1	protein-coding
5576	chr18	27119602	27120459	+	16	NA	intron (NM_031422, intron 2 of 5)	intron (NM_031422, intron 2 of 5)	65278	NM_031422	83539		NM_031422	ENSG00000154080	CHST9	GALNAC4ST-2|GalNAc4ST2	carbohydrate sulfotransferase 9	protein-coding
4208	chr13	27933517	27934087	+	16	NA	Intergenic	Intergenic	13802	NM_000209	3651		NM_000209	ENSG00000139515	PDX1	GSF|IDX-1|IPF1|IUF1|MODY4|PAGEN1|PDX-1|STF-1	pancreatic and duodenal homeobox 1	protein-coding
6787	chr10	119199117	119199628	+	16	NA	Intergenic	MLT1A0|LTR|ERVL-MaLR	-8199	NM_005308	2869		NM_005308	ENSG00000198873	GRK5	FP2025|GPRK5	G protein-coupled receptor kinase 5	protein-coding
5582-3	chr20	8073196	8073749	+	16	NA	Intergenic	MLT1F2|LTR|ERVL-MaLR	-53711	NM_021156	56255		NM_021156	ENSG00000125827	TMX4	DJ971N18.2|PDIA14|TXNDC13	thioredoxin related transmembrane protein 4	protein-coding
3022-5	chr9	69207241	69207935	+	16	NA	intron (NM_001170416, intron 1 of 22)	L1ME3F|LINE|L1	2433	NM_001369874	9414		NM_004817	ENSG00000119139	TJP2	C9DUPq21.11|DFNA51|DUP9q21.11|FHCA1|PFIC4|X104|ZO2	tight junction protein 2	protein-coding
5443	chr6_GL000252v2_alt	3053887	3054856	+	16	NA	intron (NM_021177, intron 1 of 4).2	intron (NM_021177, intron 1 of 4).2	370	NM_021177	57819		NM_021177	ENSG00000204392	LSM2	C6orf28|G7B|YBL026W|snRNP	LSM2 homolog, U6 small nuclear RNA and mRNA degradation associated	protein-coding
4971	chr22	24730784	24731624	+	16	NA	intron (NM_001008496, intron 14 of 20)	PABL_A|LTR|ERV1	-33297	NR_001283	7152		NR_001283		TOP1P2	-	DNA topoisomerase I pseudogene 2	pseudo
4868-5	chr2	241308533	241309370	+	16	NA	intron (NM_005336, intron 1 of 27)	L2a|LINE|L2	-6236	NM_001008491	4735		NM_004404	ENSG00000168385	SEPTIN2	DIFF6|NEDD-5|NEDD5|Pnutl3|SEPT2|Septin-2|hNedd5	septin 2	protein-coding
7326	chr1	229624698	229625677	+	16	NA	intron (NM_014409, intron 1 of 4)	intron (NM_014409, intron 1 of 4)	860	NM_014409	27097		NM_014409	ENSG00000135801	TAF5L	PAF65B	TATA-box binding protein associated factor 5 like	protein-coding
6410-2	chr12	507360	508305	+	16	NA	intron (NM_173593, intron 1 of 19)	intron (NM_173593, intron 1 of 19)	47893	NM_173593	283358		NM_173593	ENSG00000139044	B4GALNT3	-	beta-1,4-N-acetyl-galactosaminyltransferase 3	protein-coding
2427-3	chr12	65957649	65958217	+	16	NA	intron (NM_003483, intron 4 of 4)	intron (NM_003483, intron 4 of 4)	65793	NR_106722	102464827		NR_106722	ENSG00000276878	MIR6074	hsa-mir-6074	microRNA 6074	ncRNA
8716	chr9	115672437	115673661	+	16	NA	Intergenic	Intergenic	71190	NR_109805	101928775		NR_109805		LOC101928775	-	uncharacterized LOC101928775	ncRNA
5909	chr13	27599990	27601023	+	16	NA	intron (NM_153371, intron 1 of 9)	intron (NM_153371, intron 1 of 9)	20023	NM_153371	222484		NM_153371	ENSG00000139517	LNX2	PDZRN1	ligand of numb-protein X 2	protein-coding
28872	chr14	105088119	105089346	+	16	NA	Intergenic	MIR|SINE|MIR	-5415	NR_110546	102723354		NR_110546		LINC02298	-	long intergenic non-protein coding RNA 2298	ncRNA
7833	chr12	55719192	55719230	+	16	NA	non-coding (NR_037658, exon 3 of 6)	non-coding (NR_037658, exon 3 of 6)	-1182	NM_002905	5959		NM_002905	ENSG00000135437	RDH5	9cRDH|HSD17B9|RDH1|SDR9C5	retinol dehydrogenase 5	protein-coding
5336-4	chr22	23621888	23622942	+	16	NA	intron (NM_016449, intron 3 of 11)	intron (NM_016449, intron 3 of 11)	9906	NM_016449	51233		NM_016449	ENSG00000189269	DRICH1	C22orf43|KB-208E9.1	aspartate rich 1	protein-coding
9314	chr8	144312259	144313598	+	16	NA	intron (NM_005526, intron 9 of 12)	intron (NM_005526, intron 9 of 12)	4387	NR_106907	102465511		NR_106907	ENSG00000284229	MIR6848	hsa-mir-6848	microRNA 6848	ncRNA
9492-2	chr2	111409404	111409444	+	16	NA	intron (NR_136161, intron 1 of 5)	intron (NR_136161, intron 1 of 5)	85737	NR_136164	541471		NM_001013744	ENSG00000172965	MIR4435-2HG	AGD2|LINC00978|MIR4435-1HG|MORRBID|lncRNA-AWPPH	MIR4435-2 host gene	ncRNA
14003	chr6	142379654	142381060	+	16	NA	intron (NM_001032394, intron 4 of 24)	MER4B|LTR|ERV1	78350	NM_198569	57211		NM_020455	ENSG00000112414	ADGRG6	APG1|DREG|GPR126|LCCS9|PR126|PS1TP2|VIGR	adhesion G protein-coupled receptor G6	protein-coding
20352	chr4_GL000008v2_random	717	1485	+	16	NA	Intergenic	AluJb|SINE|Alu	177070	NR_046228	100874392		NR_046228		ANKRD20A12P	-	ankyrin repeat domain 20 family member A12, pseudogene	pseudo
8595-2	chr2	126655823	126656799	+	16	NA	exon (NM_002101, exon 1 of 4)	exon (NM_002101, exon 1 of 4)	153	NM_002101	2995		NM_002101	ENSG00000136732	GYPC	CD236|CD236R|GE|GPC|GPD|GYPD|PAS-2|PAS-2'	glycophorin C (Gerbich blood group)	protein-coding
11465	chr5	80188472	80188534	+	16	NA	intron (NM_001174072, intron 2 of 11)	L1ME3G|LINE|L1	67545	NM_001174071	256987		NM_178276	ENSG00000164300	SERINC5	C5orf12|TPO1	serine incorporator 5	protein-coding
6842	chr16	22321195	22322055	+	16	NA	intron (NM_018119, intron 13 of 20).2	MIR3|SINE|MIR	24216	NM_001258036	55718		NM_018119	ENSG00000058600	POLR3E	C37|RPC5|SIN	RNA polymerase III subunit E	protein-coding
8054	chr11	12695179	12696192	+	16	NA	intron (NM_021961, intron 2 of 12)	intron (NM_021961, intron 2 of 12)	21264	NM_021961	7003		NM_021961	ENSG00000187079	TEAD1	AA|NTEF-1|REF1|TCF-13|TCF13|TEAD-1|TEF-1	TEA domain transcription factor 1	protein-coding
6670-2	chr2	96536199	96537175	+	16	NA	promoter-TSS (NM_001319085)	promoter-TSS (NM_001319085)	-65	NM_001319096	10865		NM_006673	ENSG00000196843	ARID5A	MRF-1|MRF1|RP11-363D14	AT-rich interaction domain 5A	protein-coding
8548	chr11	27374042	27375750	+	16	NA	intron (NM_018490, intron 13 of 17)	intron (NM_018490, intron 13 of 17)	-11648	NM_080654	91057		NM_030771	ENSG00000109881	CCDC34	L15|NY-REN-41|RAMA3|SPGF76	coiled-coil domain containing 34	protein-coding
3499-4	chr7	95526148	95526407	+	16	NA	intron (NM_145872, intron 2 of 2)	MER83B|LTR|ERV1	40334	NM_016116	51666		NM_016116	ENSG00000005981	ASB4	ASB-4	ankyrin repeat and SOCS box containing 4	protein-coding
3607-2	chr3	164824849	164825162	+	16	NA	intron (NR_126405, intron 1 of 3)	PABL_A|LTR|ERV1	6475	NR_126405	104355289		NR_126405	ENSG00000241767	LINC01324	-	long intergenic non-protein coding RNA 1324	ncRNA
7592	chr16	12089812	12090620	+	16	NA	intron (NM_032167, intron 11 of 20)	MIRb|SINE|MIR	113482	NM_001376490	92017		NM_032167	ENSG00000048471	SNX29	A-388D4.1|RUNDC2A	sorting nexin 29	protein-coding
5436-4	chr9	14302456	14303134	+	16	NA	intron (NR_161383, intron 1 of 7)	intron (NR_161383, intron 1 of 7)	-2531	NM_001369479	4781		NM_005596	ENSG00000147862	NFIB	CTF|HMGIC/NFIB|MACID|NF-I/B|NF1-B|NFI-B|NFI-RED|NFIB2|NFIB3	nuclear factor I B	protein-coding
18097	chr13	29888946	29888953	+	16	NA	promoter-TSS (NR_046510)	promoter-TSS (NR_046510)	-544	NR_046510	100874059		NR_046510	ENSG00000224329	LINC00297	NCRNA00297	long intergenic non-protein coding RNA 297	ncRNA
5744	chr3	172148382	172149198	+	16	NA	intron (NM_022763, intron 3 of 25)	intron (NM_022763, intron 3 of 25)	108259	NM_001135095	64778		NM_022763	ENSG00000075420	FNDC3B	FAD104|PRO4979|YVTM2421	fibronectin type III domain containing 3B	protein-coding
4954	chr6	111356440	111357152	+	16	NA	intron (NM_001372078, intron 18 of 31)	intron (NM_001372078, intron 18 of 31)	97457	NM_153369	91749		NM_153369	ENSG00000173214	MFSD4B	KIAA1919|NaGLT1|SLC60A2	major facilitator superfamily domain containing 4B	protein-coding
6221-2	chr6	79573913	79575310	+	16	NA	Intergenic	L1MB3|LINE|L1	-37181	NM_001122769	167691		NM_181714	ENSG00000135338	LCA5	C6orf152	lebercilin LCA5	protein-coding
5615	chr20	35191941	35192602	+	16	NA	intron (NM_001355008, intron 4 of 14)	L1ME3A|LINE|L1	20199	NM_006404	10544		NM_006404	ENSG00000101000	PROCR	CCCA|CCD41|EPCR	protein C receptor	protein-coding
6078-5	chr9	136400167	136400791	+	16	NA	Intergenic	MIRb|SINE|MIR	-2042	NM_003086	6621		NM_003086	ENSG00000165684	SNAPC4	NEDRSO|PTFalpha|SNAP190	small nuclear RNA activating complex polypeptide 4	protein-coding
10590	chr12	121210099	121211803	+	16	NA	intron (NR_046373, intron 1 of 10)	intron (NR_046373, intron 1 of 10)	822	NM_001261397	5025		NM_002560	ENSG00000135124	P2RX4	P2X4|P2X4R	purinergic receptor P2X 4	protein-coding
7623	chrX	139932545	139933561	+	16	NA	promoter-TSS (NM_001353812)	promoter-TSS (NM_001353812)	0	NM_001353812	286410		NM_173694	ENSG00000101974	ATP11C	ATPIG|ATPIQ|HACXL	ATPase phospholipid transporting 11C	protein-coding
7388	chr5	164397648	164398805	+	16	NA	Intergenic	Intergenic	69176	NR_105064	101927835		NR_105064		LINC02143	-	long intergenic non-protein coding RNA 2143	ncRNA
19396	chr16	72994679	72995792	+	16	NA	intron (NM_006885, intron 1 of 9)	intron (NM_006885, intron 1 of 9)	52893	NM_006885	463		NM_006885	ENSG00000140836	ZFHX3	ATBF1|ATBT|ATFB8|C16orf47|SCA4|ZFH-3|ZNF927	zinc finger homeobox 3	protein-coding
4890	chr15	81798071	81798610	+	16	NA	Intergenic	L1PA2|LINE|L1	247678	NM_032246	84206		NM_032246	ENSG00000183496	MEX3B	MEX-3B|RKHD3|RNF195	mex-3 RNA binding family member B	protein-coding
4348	chr12	45348482	45349017	+	16	NA	intron (NM_001204803, intron 7 of 20)	intron (NM_001204803, intron 7 of 20)	56059	NM_001142678	196527		NM_001025356	ENSG00000177119	ANO6	BDPLT7|SCTS|TMEM16F	anoctamin 6	protein-coding
8066	chr14_GL000225v1_random	11741	12227	+	16	NA	NA	BSR/Beta|Satellite|Satellite	NA	NA
4490-5	chr3	154059677	154060251	+	16	NA	intron (NR_037901, intron 2 of 3)	intron (NR_037901, intron 2 of 3)	-61039	NM_001251962	26084		NM_015595	ENSG00000114790	ARHGEF26	CSGEF|HMFN1864|SGEF	Rho guanine nucleotide exchange factor 26	protein-coding
2845-3	chr13	31846613	31847033	+	16	NA	promoter-TSS (NR_027062)	promoter-TSS (NR_027062)	40	NR_027062	196549		NM_145293		EEF1DP3	-	eukaryotic translation elongation factor 1 delta pseudogene 3	pseudo
8190	chr14	95359948	95361171	+	16	NA	Intergenic	CpG	30975	NR_110127	101929080		NR_110127	ENSG00000258630	LINC02292	-	long intergenic non-protein coding RNA 2292	ncRNA
7290	chr17	31008385	31009367	+	16	NA	intron (NM_001350575, intron 1 of 5)	CpG	592	NM_001350575
3995-4	chr11	74138511	74139092	+	16	NA	exon (NM_001286577, exon 5 of 33)	exon (NM_001286577, exon 5 of 33)	32201	NM_001286577	26005		NM_015531	ENSG00000168014	C2CD3	OFD14	C2 domain containing 3 centriole elongation regulator	protein-coding
6052-3	chr4	49315976	49317239	+	16	NA	Intergenic	ACRO1|Satellite|acro	329965	NM_001286791	80157		NM_025087	ENSG00000109182	CWH43	CWH43-C|PGAP2IP	cell wall biogenesis 43 C-terminal homolog	protein-coding
12331	chr13	44242858	44244052	+	16	NA	Intergenic	Intergenic	-47255	NR_107046	102465876		NR_107046	ENSG00000276319	MIR8079	hsa-mir-8079	microRNA 8079	ncRNA
7129	chr17	67575081	67576783	+	16	NA	intron (NM_181671, intron 4 of 9)	AluSx|SINE|Alu	-104347	NR_030385	693131		NR_030385	ENSG00000263690	MIR548D2	MIRN548D2	microRNA 548d-2	ncRNA
6113-2	chr22	29994517	29995254	+	16	NA	intron (NM_153051, intron 7 of 18)	intron (NM_153051, intron 7 of 18)	-12164	NR_106876	102466742		NR_106876	ENSG00000275818	MIR6818	hsa-mir-6818	microRNA 6818	ncRNA
9157-2	chr10	113131895	113132285	+	16	NA	intron (NM_001349870, intron 1 of 11)	intron (NM_001349870, intron 1 of 11)	2819	NM_001349870	6934		NM_030756	ENSG00000148737	TCF7L2	TCF-4|TCF4	transcription factor 7 like 2	protein-coding
6357-3	chr9	61867437	61868409	+	16	NA	intron (NR_121606, intron 2 of 2)	intron (NR_121606, intron 2 of 2)	1215	NR_121606	102723709		NR_121606		LOC102723709	-	uncharacterized LOC102723709	ncRNA
6423	chr6	159972608	159973180	+	16	NA	intron (NM_000876, intron 1 of 47)	intron (NM_000876, intron 1 of 47)	3812	NM_000876	3482		NM_000876	ENSG00000197081	IGF2R	CD222|CI-M6PR|CIMPR|M6P-R|M6P/IGF2R|MPR 300|MPR1|MPR300|MPRI	insulin like growth factor 2 receptor	protein-coding
6085	chr14	93959027	93960039	+	16	NA	intron (NM_001202429, intron 2 of 9)	intron (NM_001202429, intron 2 of 9)	-2486	NM_016150	51676		NM_016150	ENSG00000100628	ASB2	ASB-2	ankyrin repeat and SOCS box containing 2	protein-coding
3165	chr1	36096931	36097353	+	16	NA	3' UTR (NM_005202, exon 4 of 4)	3' UTR (NM_005202, exon 4 of 4)	8250	NM_017825	54936		NM_017825	ENSG00000116863	ADPRS	ADPRHL2|ARH3|CONDSIAS	ADP-ribosylserine hydrolase	protein-coding
14883	chr11	64005778	64006455	+	16	NA	intron (NM_014067, intron 4 of 10)	MIRb|SINE|MIR	20263	NR_003089	55611		NM_017670	ENSG00000167770	OTUB1	HSPC263|OTB1|OTU1	OTU deubiquitinase, ubiquitin aldehyde binding 1	protein-coding
6544	chr1	30663009	30663781	+	16	NA	Intergenic	MIR|SINE|MIR	-55377	NR_034182	100129196		NR_034182	ENSG00000186056	MATN1-AS1	-	MATN1 antisense RNA 1	ncRNA
8437	chr19	49862445	49863596	+	16	NA	intron (NM_007254, intron 8 of 16)	CpG-14959	-3731	NR_110730	101928378		NR_110730		PTOV1-AS2	-	PTOV1 antisense RNA 2	ncRNA
5894	chr7	134870632	134870733	+	16	NA	intron (NM_033138, intron 3 of 14)	(TTTC)n|Simple_repeat|Simple_repeat	-20718	NM_033139	800		NM_004342	ENSG00000122786	CALD1	CDM|H-CAD|HCAD|L-CAD|LCAD|NAG22|h-CD	caldesmon 1	protein-coding
4805-3	chr6	35472855	35473574	+	16	NA	TTS (NM_003214)	TTS (NM_003214)	2706	NR_106961	102465668		NR_106961	ENSG00000276712	MIR7111	hsa-mir-7111	microRNA 7111	ncRNA
5543	chr2	218745748	218746496	+	16	NA	intron (NM_014640, intron 7 of 19)	intron (NM_014640, intron 7 of 19)	35287	NM_014640	9654		NM_014640	ENSG00000135912	TTLL4	-	tubulin tyrosine ligase like 4	protein-coding
7842	chr1	87797250	87798560	+	16	NA	Intergenic	MamRep1894|DNA|hAT	-426250	NR_038324	100505768		NR_038324	ENSG00000227290	LINC01364	-	long intergenic non-protein coding RNA 1364	ncRNA
5555	chr3	169304907	169305093	+	16	NA	intron (NM_001205194, intron 1 of 15)	intron (NM_001205194, intron 1 of 15)	-142867	NR_134932	105374205		NR_134932	ENSG00000241479	MECOM-AS1	-	MECOM antisense RNA 1	ncRNA
3637-4	chr2	177622409	177623095	+	16	NA	TTS (NM_001077197)	TTS (NM_001077197)	-4010	NM_152275	92104		NM_152275	ENSG00000197557	IFT70A	CFAP259|FAP259|TTC30A|TTC30B	intraflagellar transport 70A	protein-coding
13123-2	chr12	65960818	65960970	+	16	NA	intron (NM_003483, intron 4 of 4)	intron (NM_003483, intron 4 of 4)	62832	NR_106722	102464827		NR_106722	ENSG00000276878	MIR6074	hsa-mir-6074	microRNA 6074	ncRNA
7390-2	chr7	47610612	47611298	+	16	NA	Intergenic	Intergenic	-10984	NR_108090	101929086		NR_108090	ENSG00000236078	LINC01447	-	long intergenic non-protein coding RNA 1447	ncRNA
3541-5	chr4	11779930	11780359	+	16	NA	Intergenic	Intergenic	-3034	NR_162127	113218507		NR_162127		MIR12113	-	microRNA 12113	ncRNA
5849	chr1	234605886	234606617	+	16	NA	3' UTR (NM_001077397, exon 2 of 2)	3' UTR (NM_001077397, exon 2 of 2)	3274	NM_182972	359948		NM_182972	ENSG00000168264	IRF2BP2	CVID14	interferon regulatory factor 2 binding protein 2	protein-coding
11641	chr1	23370300	23370464	+	16	NA	promoter-TSS (NM_001077195)	promoter-TSS (NM_001077195)	-546	NM_001077195	80818		NM_030634	ENSG00000125945	ZNF436	ZNF|Zfp46	zinc finger protein 436	protein-coding
8082	chrUn_KI270754v1	34714	35570	+	16	NA	NA	SST1|Satellite|centr	NA	NA
4059	chr5	107526045	107526594	+	16	NA	intron (NM_001962, intron 1 of 4)	intron (NM_001962, intron 1 of 4)	144618	NM_001962	1946		NM_001962	ENSG00000184349	EFNA5	AF1|EFL5|EPLG7|GLC1M|LERK7|RAGS	ephrin A5	protein-coding
8523	chr3	32322386	32322493	+	16	NA	intron (NM_001320308, intron 1 of 2)	intron (NM_001320308, intron 1 of 2)	-69414	NM_138410	112616		NM_138410	ENSG00000153551	CMTM7	CKLFSF7	CKLF like MARVEL transmembrane domain containing 7	protein-coding
6300-2	chr17	14297319	14298563	+	16	NA	Intergenic	MIR3|SINE|MIR	-3140	NM_006041	9953		NM_006041	ENSG00000125430	HS3ST3B1	3-OST-3B|3OST3B1|h3-OST-3B	heparan sulfate-glucosamine 3-sulfotransferase 3B1	protein-coding
11713	chr17	40338636	40339548	+	16	NA	intron (NM_001145302, intron 2 of 6)	intron (NM_001145302, intron 2 of 6)	-3074	NM_001024809	5914		NM_000964	ENSG00000131759	RARA	NR1B1|RAR|RARalpha	retinoic acid receptor alpha	protein-coding
7019-2	chr10	109974342	109975530	+	16	NA	intron (NR_038943, intron 2 of 4)	intron (NR_038943, intron 2 of 4)	-21437	NM_001320591	120		NM_001121	ENSG00000148700	ADD3	ADDL|CPSQ3	adducin 3	protein-coding
10643	chr13	98475452	98475523	+	16	NA	intron (NM_001286649, intron 2 of 9)	intron (NM_001286649, intron 2 of 9)	46638	NM_003576	8428		NM_003576	ENSG00000102572	STK24	HEL-S-95|MST3|MST3B|STE20|STK3	serine/threonine kinase 24	protein-coding
4545-3	chr9	65196271	65196886	+	16	NA	Intergenic	REP522|Satellite|telo	51645	NR_136299	101929583		NR_136299		LOC101929583	-	methylenetetrahydrofolate dehydrogenase (NADP+ dependent) 1 like pseudogene	pseudo
8460	chr7	90406978	90407935	+	16	NA	intron (NM_001185073, intron 2 of 2)	intron (NM_001185073, intron 2 of 2)	3995	NM_001185073	9069		NM_012129	ENSG00000157224	CLDN12	-	claudin 12	protein-coding
4216-4	chr4	82631000	82631412	+	16	NA	3' UTR (NM_001037582, exon 5 of 5)	3' UTR (NM_001037582, exon 5 of 5)	-9769	NR_024087	439934		NM_001033661	ENSG00000231782	LINC00575	C4orf11	long intergenic non-protein coding RNA 575	ncRNA
8745	chr14	103847651	103848008	+	16	NA	promoter-TSS (NM_015316)	intron (NR_038436, intron 1 of 2)	108	NR_038436	145216		NR_038436	ENSG00000258735	PPP1R13B-DT	HITT|LINC00637	PPP1R13B divergent transcript	ncRNA
4120-4	chr5	80218706	80218938	+	16	NA	intron (NM_001174072, intron 1 of 11)	intron (NM_001174072, intron 1 of 11)	37226	NM_001174071	256987		NM_178276	ENSG00000164300	SERINC5	C5orf12|TPO1	serine incorporator 5	protein-coding
9158	chr10	81730611	81731817	+	16	NA	Intergenic	MER4E|LTR|ERV1	-143980	NM_001370084	10718		NM_001010848	ENSG00000185737	NRG3	HRG3|pro-NRG3	neuregulin 3	protein-coding
12232	chr6	42978318	42978835	+	15	NA	exon (NM_001316313, exon 1 of 17)	exon (NM_001316313, exon 1 of 17)	605	NM_000287	5190		NM_000287	ENSG00000124587	PEX6	HMLR2|PAF-2|PAF2|PBD4A|PDB4B|PXAAA1	peroxisomal biogenesis factor 6	protein-coding
3800-3	chr20	47125959	47126386	+	15	NA	intron (NM_172110, intron 9 of 13)	intron (NM_172110, intron 9 of 13)	-40795	NR_037410	100500814		NR_037410	ENSG00000264901	MIR3616	mir-3616	microRNA 3616	ncRNA
6369	chr2	162478110	162479231	+	15	NA	intron (NM_173162, intron 5 of 7)	MamRep434|DNA|TcMar-Tigger	134302	NM_001330271	25801		NM_012198	ENSG00000115271	GCA	GCL	grancalcin	protein-coding
16745	chr9	69746995	69750515	+	15	NA	intron (NR_159515, intron 1 of 6)	intron (NR_159515, intron 1 of 6)	11256	NM_001366940	375743		NM_001099666	ENSG00000188647	PTAR1	-	protein prenyltransferase alpha subunit repeat containing 1	protein-coding
4319-4	chr4	124928394	124928872	+	15	NA	Intergenic	UCON132b|DNA|hAT-Tip100	-215901	NM_020337	57182		NM_020337	ENSG00000151458	ANKRD50	-	ankyrin repeat domain containing 50	protein-coding
7299	chr22	45248053	45249106	+	15	NA	Intergenic	Intergenic	-7685	NM_001009880	23313		NM_015264	ENSG00000100364	KIAA0930	C22orf9|LSC3	KIAA0930	protein-coding
9576-2	chr11	65354930	65355738	+	15	NA	intron (NM_145719, intron 1 of 1)	intron (NM_145719, intron 1 of 1)	583	NM_145719	220359		NM_145719	ENSG00000173825	TIGD3	-	tigger transposable element derived 3	protein-coding
9404	chr11	61335876	61335876	+	15	NA	5' UTR (NM_001351980, exon 3 of 19)	5' UTR (NM_001351980, exon 3 of 19)	2648	NM_001351977	26007		NM_015533	ENSG00000149476	TKFC	DAK|NET45|TKFCD	triokinase and FMN cyclase	protein-coding
6536-2	chr6	21756467	21757479	+	15	NA	intron (NR_015410, intron 2 of 11)	L2b|LINE|L2	90560	NR_015410	401237		NR_015410		CASC15	CANT|LINC00340|lnc-SOX4-1	cancer susceptibility 15	ncRNA
3524-5	chr2	49240691	49241300	+	15	NA	Intergenic	Intergenic	-86480	NM_000145	2492		NM_000145	ENSG00000170820	FSHR	FSHR1|FSHRO|LGR1|ODG1	follicle stimulating hormone receptor	protein-coding
5000-2	chr9	16626690	16627270	+	15	NA	intron (NM_001317940, intron 2 of 5)	intron (NM_001317940, intron 2 of 5)	-99834	NR_151723	111216284		NR_151723	ENSG00000234779	BNC2-AS1	-	BNC2 antisense RNA 1	ncRNA
8428-2	chr6	167307395	167308006	+	15	NA	intron (NM_018974, intron 6 of 7)	intron (NM_018974, intron 6 of 7)	16385	NM_018974	54346		NM_018974	ENSG00000112494	UNC93A	Unc-93A|dJ366N23.1|dJ366N23.2	unc-93 homolog A	protein-coding
5171	chr2	85998186	85999008	+	15	NA	Intergenic	Intergenic	107289	NM_015425	25885		NM_015425	ENSG00000068654	POLR1A	A190|AFDCIN|HLD27|RPA1|RPA190|RPA194|RPO1-4|RPO14	RNA polymerase I subunit A	protein-coding
5112	chrX	21948665	21949320	+	15	NA	intron (NM_004595, intron 1 of 10)	intron (NM_004595, intron 1 of 10)	8283	NM_004595	6611		NM_004595	ENSG00000102172	SMS	MRSR|MRXSSR|SPMSY|SRS|SpS	spermine synthase	protein-coding
6731	chr11	28169960	28171074	+	15	NA	intron (NM_001297775, intron 3 of 6)	MER41B|LTR|ERV1	62129	NM_152636	196074		NM_152636	ENSG00000169519	METTL15	METT5D1	methyltransferase 15, mitochondrial 12S rRNA N4-cytidine	protein-coding
4515-5	chr6	5850697	5851707	+	15	NA	Intergenic	Intergenic	152842	NM_001278711	51299		NM_016588	ENSG00000124785	NRN1	NRN|dJ380B8.2	neuritin 1	protein-coding
2681-6	chr7	18761932	18762485	+	15	NA	exon (NM_001321877, exon 14 of 25)	exon (NM_001321877, exon 14 of 25)	252938	NM_001204147	9734		NM_014707	ENSG00000048052	HDAC9	ARCND4|HD7|HD7b|HD9|HDAC|HDAC7|HDAC7B|HDAC9B|HDAC9FL|HDRP|MITR	histone deacetylase 9	protein-coding
7016-3	chr17	47810119	47810965	+	15	NA	intron (NM_145798, intron 18 of 22)	intron (NM_145798, intron 18 of 22)	11252	NM_145798	114881		NM_017731	ENSG00000006025	OSBPL7	ORP7	oxysterol binding protein like 7	protein-coding
6341	chr11	46121867	46122675	+	15	NA	promoter-TSS (NM_001352027)	promoter-TSS (NM_001352027)	-817	NM_001352030	51317		NM_016621	ENSG00000135365	PHF21A	BHC80|BM-006|IDDBCS|NEDMS	PHD finger protein 21A	protein-coding
4724-4	chr22	50643565	50644337	+	15	NA	Intergenic	LTR8|LTR|ERV1	-15799	NM_000487	410		NM_000487	ENSG00000100299	ARSA	ASA|MLD	arylsulfatase A	protein-coding
5503	chr20	64255163	64256442	+	15	NA	promoter-TSS (NM_018257)	promoter-TSS (NM_018257)	54	NM_018257	55251		NM_018257	ENSG00000203880	PCMTD2	C20orf36	protein-L-isoaspartate (D-aspartate) O-methyltransferase domain containing 2	protein-coding
3065-10	chrY	12749223	12749596	+	15	NA	intron (NM_004654, intron 12 of 45)	LTR25-int|LTR|ERV1	48178	NM_004654	8287		NM_004654	ENSG00000114374	USP9Y	DFFRY|FAF-Y|SPGFY2	ubiquitin specific peptidase 9 Y-linked	protein-coding
9743	chr2	219533153	219534151	+	15	NA	intron (NM_018674, intron 5 of 9)	L2b|LINE|L2	9445	NM_001195731	79586		NM_024536	ENSG00000123989	CHPF	CHPF1|CHSY2|CSS2	chondroitin polymerizing factor	protein-coding
12064	chr4	26021816	26023939	+	15	NA	Intergenic	Intergenic	108685	NM_001145432	389203		NM_001145432	ENSG00000250317	SMIM20	C4orf52|MITRAC7|PNX	small integral membrane protein 20	protein-coding
9628	chr6	14922053	14922948	+	15	NA	Intergenic	Intergenic	-323569	NM_004973	3720		NM_004973	ENSG00000008083	JARID2	DIDDF|JMJ	jumonji and AT-rich interaction domain containing 2	protein-coding
25212-2	chr10	86962672	86964254	+	15	NA	TTS (NM_001330120)	TTS (NM_001330120)	4864	NM_003087	6623		NM_003087	ENSG00000173267	SNCG	BCSG1|SR	synuclein gamma	protein-coding
8857	chr3	31959782	31959825	+	15	NA	intron (NM_001174060, intron 1 of 10)	intron (NM_001174060, intron 1 of 10)	-21947	NM_001137674	344787		NM_001137674	ENSG00000197385	ZNF860	-	zinc finger protein 860	protein-coding
6153	chr17	44977910	44978011	+	15	NA	Intergenic	Intergenic	-9657	NM_006688	10882		NM_006688	ENSG00000131094	C1QL1	C1QRF|C1QTNF14|CRF|CTRP14	complement C1q like 1	protein-coding
8605	chr5	79493945	79494842	+	15	NA	intron (NM_001277077, intron 1 of 5)	intron (NM_001277077, intron 1 of 5)	19443	NM_001277077	9456		NM_004272	ENSG00000152413	HOMER1	HOMER|HOMER1A|HOMER1B|HOMER1C|SYN47|Ves-1	homer scaffold protein 1	protein-coding
9362	chr20	64053730	64054671	+	15	NA	Intergenic	Intergenic	-2772	NM_198723	6919		NM_003195	ENSG00000171703	TCEA2	TFIIS	transcription elongation factor A2	protein-coding
8627	chr11	64852138	64852921	+	15	NA	TTS (NM_001282445)	TTS (NM_001282445)	-7876	NM_017525	55561		NM_017525	ENSG00000171219	CDC42BPG	DMPK2|HSMDPKIN|KAPPA-200|MRCKG|MRCKgamma	CDC42 binding protein kinase gamma	protein-coding
3268-6	chr2	110053674	110054153	+	15	NA	Intergenic	Intergenic	16129	NR_036225	100422994		NR_036225	ENSG00000265682	MIR4267	-	microRNA 4267	ncRNA
2599-6	chr5	31217457	31217907	+	15	NA	intron (NM_004932, intron 1 of 11)	L2a|LINE|L2	23996	NM_001362435	1004		NM_004932	ENSG00000113361	CDH6	CAD6|KCAD	cadherin 6	protein-coding
10433	chr21	41641012	41642978	+	15	NA	Intergenic	Intergenic	-37307	NR_024367	54090		NR_024367		LINC00111	C21orf21|NCRNA00111	long intergenic non-protein coding RNA 111	ncRNA
7859	chr10	26319352	26320161	+	15	NA	Intergenic	HAL1ME|LINE|L1	102982	NM_001134366	2572		NM_000818	ENSG00000136750	GAD2	GAD65	glutamate decarboxylase 2	protein-coding
24348-2	chr3	50266252	50266686	+	15	NA	TTS (NR_110702)	TTS (NR_110702)	902	NR_110702	101928931		NR_110702		SEMA3B-AS1	-	SEMA3B antisense RNA 1 (head to head)	ncRNA
4278-3	chr20_KI270870v1_alt	163580	164316	+	15	NA	promoter-TSS (NM_001104925)	promoter-TSS (NM_001104925)	-338	NM_001104925	55251		NM_018257	ENSG00000203880	PCMTD2	C20orf36	protein-L-isoaspartate (D-aspartate) O-methyltransferase domain containing 2	protein-coding
5672	chr13	51620261	51621138	+	15	NA	intron (NM_052950, intron 1 of 11)	intron (NM_052950, intron 1 of 11)	36237	NM_052950	115825		NM_052950	ENSG00000139668	WDFY2	PROF|WDF2|ZFYVE22	WD repeat and FYVE domain containing 2	protein-coding
4907	chr1	109776822	109777966	+	15	NA	Intergenic	Intergenic	-13471	NM_133181	79574		NM_024526	ENSG00000198758	EPS8L3	EPS8R3|HYPT5	EPS8 signaling adaptor L3	protein-coding
4184	chr1	156657184	156657831	+	15	NA	intron (NM_021948, intron 10 of 13)	intron (NM_021948, intron 10 of 13)	15390	NM_021948	63827		NM_021948	ENSG00000132692	BCAN	BEHAB|CSPG7	brevican	protein-coding
5041-2	chr8	11820135	11820893	+	15	NA	intron (NM_004462, intron 3 of 7)	L1PA6|LINE|L1	11370	NM_001287751	2222		NM_004462	ENSG00000079459	FDFT1	DGPT|ERG9|SQS|SQSD|SS	farnesyl-diphosphate farnesyltransferase 1	protein-coding
5726	chr12	69239082	69239830	+	15	NA	promoter-TSS (NM_007007)	promoter-TSS (NM_007007)	-113	NM_007007	11052		NM_007007	ENSG00000111605	CPSF6	CFIM|CFIM68|CFIM72|HPBRII-4|HPBRII-7	cleavage and polyadenylation specific factor 6	protein-coding
16393	chr11	2123858	2124517	+	15	NA	Intergenic	Intergenic	10022	NR_030158	619552		NR_030158	ENSG00000207805	MIR483	MIRN483|hsa-mir-483|mir-483	microRNA 483	ncRNA
23394	chr17	41770299	41771064	+	15	NA	intron (NM_001352775, intron 2 of 14)	intron (NM_001352775, intron 2 of 14)	15414	NM_001352777	3728		NM_002230	ENSG00000173801	JUP	CTNNG|DP3|DPIII|PDGB|PG|PKGB	junction plakoglobin	protein-coding
25212	chr10	86959856	86962261	+	15	NA	intron (NM_003087, intron 3 of 4)	intron (NM_003087, intron 3 of 4)	2459	NM_003087	6623		NM_003087	ENSG00000173267	SNCG	BCSG1|SR	synuclein gamma	protein-coding
6748	chr17	73616214	73617315	+	15	NA	intron (NM_001144952, intron 1 of 44)	intron (NM_001144952, intron 1 of 44)	27681	NM_001144952	54549		NM_019064	ENSG00000069188	SDK2	-	sidekick cell adhesion molecule 2	protein-coding
4814	chr16	70250652	70251320	+	15	NA	3' UTR (NM_058219, exon 1 of 1)	3' UTR (NM_058219, exon 1 of 1)	954	NM_058219	118460		NM_058219	ENSG00000223496	EXOSC6	EAP4|MTR3|Mtr3p|hMtr3p|p11	exosome component 6	protein-coding
8511	chr6	33853060	33853458	+	15	NA	Intergenic	Intergenic	43648	NR_038989	100507584		NR_038989	ENSG00000249346	LINC01016	-	long intergenic non-protein coding RNA 1016	ncRNA
5391-2	chr2	68440360	68441610	+	15	NA	Intergenic	Intergenic	26309	NR_133923	554251		NM_001024680	ENSG00000204923	FBXO48	-	F-box protein 48	protein-coding
8711	chr12	48998160	48998354	+	15	NA	promoter-TSS (NR_147178)	promoter-TSS (NR_147178)	-90	NR_147178	105369758		NR_147178	ENSG00000257913	DDN-AS1	CAT1507	DDN and PRKAG1 antisense RNA 1	ncRNA
8411-3	chr17	38743139	38743247	+	15	NA	intron (NM_001369614, intron 1 of 9)	AluSz6|SINE|Alu	3435	NM_001369615	7703		NM_007144	ENSG00000277258	PCGF2	MEL-18|RNF110|TPFS|ZNF144	polycomb group ring finger 2	protein-coding
5858	chr14	42479989	42480105	+	15	NA	Intergenic	Intergenic	873191	NR_144389	145581		NM_152447	ENSG00000165379	LRFN5	C14orf146|FIGLER8|SALM5	leucine rich repeat and fibronectin type III domain containing 5	protein-coding
3989	chr1	9234203	9234705	+	15	NA	promoter-TSS (NM_004285)	promoter-TSS (NM_004285)	-320	NM_004285	9563		NM_004285	ENSG00000049239	H6PD	CORTRD1|G6PDH|GDH|H6PDH	hexose-6-phosphate dehydrogenase/glucose 1-dehydrogenase	protein-coding
9938	chr15	52280425	52281855	+	15	NA	intron (NM_018728, intron 2 of 40)	intron (NM_018728, intron 2 of 40)	-3940	NR_031670	100302202		NR_031670	ENSG00000221052	MIR1266	MIRN1266|hsa-mir-1266|mir-1266	microRNA 1266	ncRNA
11167	chr11	69948946	69949699	+	15	NA	Intergenic	Intergenic	-36585	NM_001378092	55107		NM_018043	ENSG00000131620	ANO1	DOG1|INDMS|MYMY7|ORAOV2|TAOS2|TMEM16A	anoctamin 1	protein-coding
7563	chr2	71595277	71596532	+	15	NA	intron (NM_003494, intron 32 of 54)	intron (NM_003494, intron 32 of 54)	129205	NM_001130986	8291		NM_003494	ENSG00000135636	DYSF	FER1L1|LGMD2B|LGMDR2|MMD1	dysferlin	protein-coding
7097	chr2	15944300	15944912	+	15	NA	intron (NM_005378, intron 2 of 2)	intron (NM_005378, intron 2 of 2)	-2173	NR_161163	10408		NR_110230	ENSG00000233718	MYCNOS	MYCN-AS1|N-CYM|NCYM|NYCM	MYCN opposite strand	ncRNA
8273	chr22	38478701	38480233	+	15	NA	intron (NM_006855, intron 2 of 4)	intron (NM_006855, intron 2 of 4)	11371	NM_006855	11015		NM_006855	ENSG00000100196	KDELR3	ERD23|ERD2L3	KDEL endoplasmic reticulum protein retention receptor 3	protein-coding
8241-2	chr18	36947020	36948834	+	15	NA	intron (NM_001353918, intron 5 of 9)	MER4D1|LTR|ERV1	-24113	NR_134585	105372069		NR_134585	ENSG00000267039	LOC105372069	-	uncharacterized LOC105372069	ncRNA
14968	chr10	47401785	47402288	+	15	NA	Intergenic	Intergenic	-5129	NR_134500	107001062		NR_134500		LOC107001062	-	uncharacterized LOC107001062	ncRNA
4312	chr18	73401797	73402898	+	15	NA	Intergenic	MLT1B|LTR|ERVL-MaLR	77406	NR_038340	100505817		NR_038340	ENSG00000261780	LINC02582	-	long intergenic non-protein coding RNA 2582	ncRNA
5910-3	chr4	78627153	78628301	+	15	NA	Intergenic	Intergenic	-18267	NR_038304	100505702		NR_038303		LINC01094	CTEPHA1	long intergenic non-protein coding RNA 1094	ncRNA
8044	chr3	44047975	44049077	+	15	NA	Intergenic	Intergenic	-65686	NR_029700	406929		NR_029700	ENSG00000207954	MIR138-1	MIRN138-1|mir-138-1	microRNA 138-1	ncRNA
2807-2	chr2	171999910	172000368	+	15	NA	intron (NM_001322279, intron 1 of 9)	(AC)n|Simple_repeat|Simple_repeat	186	NM_001322278	254042		NM_199227	ENSG00000172878	METAP1D	MAP 1D|MAP1D|MetAP 1D|Metap1l	methionyl aminopeptidase type 1D, mitochondrial	protein-coding
13391	chr11	6318797	6319240	+	15	NA	TTS (NM_145040)	TTS (NM_145040)	1483	NM_145040	112464		NM_145040	ENSG00000170955	CAVIN3	HSRBC|PRKCDBP|SRBC|cavin-3	caveolae associated protein 3	protein-coding
6494-4	chr2	196592974	196593868	+	15	NA	promoter-TSS (NM_020760)	promoter-TSS (NM_020760)	133	NM_001348768	57520		NM_020760	ENSG00000138411	HECW2	NDHSAL|NEDL2	HECT, C2 and WW domain containing E3 ubiquitin protein ligase 2	protein-coding
7767	chr15	44981851	44982932	+	15	NA	Intergenic	Intergenic	25704	NM_152448	145645		NM_152448	ENSG00000167014	TERB2	C15orf43|SPGF59	telomere repeat binding bouquet formation protein 2	protein-coding
6618	chr1	217363148	217364014	+	15	NA	Intergenic	MLT1F2|LTR|ERVL-MaLR	-225879	NM_001350124	2104		NM_001438	ENSG00000196482	ESRRG	ERR-gamma|ERR3|ERRg|ERRgamma|NR3B3	estrogen related receptor gamma	protein-coding
5099	chr10	109965013	109965985	+	15	NA	intron (NR_038943, intron 2 of 4)	intron (NR_038943, intron 2 of 4)	-30874	NM_001320591	120		NM_001121	ENSG00000148700	ADD3	ADDL|CPSQ3	adducin 3	protein-coding
7649-3	chr8	144521799	144522760	+	15	NA	TTS (NM_001024678)	TTS (NM_001024678)	4287	NM_014665	9684		NM_014665	ENSG00000160959	LRRC14	LRRC14A	leucine rich repeat containing 14	protein-coding
11369	chr4	1810963	1811759	+	15	NA	TTS (NM_012318)	TTS (NM_012318)	18049	NM_022965	2261		NM_000142	ENSG00000068078	FGFR3	ACH|CD333|CEK2|HSFGFR3EX|JTK4	fibroblast growth factor receptor 3	protein-coding
5438-3	chr5	80215913	80216590	+	15	NA	intron (NM_001174072, intron 1 of 11)	MER20|DNA|hAT-Charlie	39797	NM_001174071	256987		NM_178276	ENSG00000164300	SERINC5	C5orf12|TPO1	serine incorporator 5	protein-coding
3614-4	chr17	30005606	30006181	+	15	NA	intron (NR_026738, intron 7 of 15)	MER49|LTR|ERV1	64259	NR_026738	374786		NM_198529	ENSG00000176927	EFCAB5	-	EF-hand calcium binding domain 5	protein-coding
6596-2	chr19	23723676	23724751	+	15	NA	Intergenic	LTR5_Hs|LTR|ERVK	34678	NM_138286	148213		NM_138286	ENSG00000196172	ZNF681	-	zinc finger protein 681	protein-coding
6512	chr11	119701640	119701872	+	15	NA	intron (NM_203286, intron 1 of 5)	intron (NM_203286, intron 1 of 5)	27444	NM_002855	5818		NM_002855	ENSG00000110400	NECTIN1	CD111|CLPED1|ED4|HIgR|HV1S|HVEC|OFC7|PRR|PRR1|PVRL1|PVRR|PVRR1|SK-12|nectin-1	nectin cell adhesion molecule 1	protein-coding
3591-6	chr7	98116735	98117353	+	15	NA	intron (NM_014916, intron 1 of 13)	L1MC3|LINE|L1	10182	NM_014916	22853		NM_014916	ENSG00000164715	LMTK2	AATYK2|BREK|KPI-2|KPI2|LMR2|PPP1R100|cprk|hBREK	lemur tyrosine kinase 2	protein-coding
15357	chr10	125060200	125060498	+	15	NA	intron (NM_001321013, intron 1 of 9)	intron (NM_001321013, intron 1 of 9)	-27479	NR_036178	100423041		NR_036178	ENSG00000264572	MIR4296	-	microRNA 4296	ncRNA
5975	chr1	21963688	21964611	+	15	NA	Intergenic	Intergenic	-12873	NM_007352	23436		NM_007352	ENSG00000219073	CELA3B	CBPP|ELA3B	chymotrypsin like elastase 3B	protein-coding
8423-2	chr6	2589210	2589992	+	15	NA	Intergenic	L1MA9|LINE|L1	-44899	NR_149119	105374885		NR_149118		LINC02521	-	long intergenic non-protein coding RNA 2521	ncRNA
13942	chr17	81314339	81314836	+	15	NA	intron (NR_165247, intron 1 of 2)	intron (NR_165247, intron 1 of 2)	-5339	NR_038080	284185		NM_178519		LINC00482	C17orf55	long intergenic non-protein coding RNA 482	ncRNA
4396-2	chr4	13427552	13428342	+	15	NA	intron (NM_001017979, intron 4 of 6)	LTR2|LTR|ERV1	56393	NM_004249	9364		NM_004249	ENSG00000157869	RAB28	CORD18	RAB28, member RAS oncogene family	protein-coding
7218	chr1	61403693	61404543	+	15	NA	exon (NM_005595, exon 8 of 10)	exon (NM_005595, exon 8 of 10)	-150600	NR_104180	645030		NR_104180	ENSG00000237853	NFIA-AS1	-	NFIA antisense RNA 1	ncRNA
16874	chr10	99925996	99929115	+	15	NA	intron (NR_024130, intron 1 of 4)	MIRb|SINE|MIR	350	NR_024130	100188954		NR_024130	ENSG00000227695	DNMBP-AS1	NCRNA00093	DNMBP antisense RNA 1	ncRNA
7975-2	chr2	23480816	23482078	+	15	NA	intron (NM_052920, intron 2 of 13)	intron (NM_052920, intron 2 of 13)	96268	NM_052920	114818		NM_025067	ENSG00000119771	KLHL29	KBTBD9	kelch like family member 29	protein-coding
5820	chr16	22353863	22354774	+	15	NA	intron (NM_001802, intron 2 of 4)	intron (NM_001802, intron 2 of 4)	20301	NM_001802	1039		NM_001802	ENSG00000140743	CDR2	CDR62|Yo	cerebellar degeneration related protein 2	protein-coding
6651	chr7	5406753	5407689	+	15	NA	intron (NM_001080495, intron 2 of 29)	intron (NM_001080495, intron 2 of 29)	16325	NM_001080495	84629		NM_001013722	ENSG00000182095	TNRC18	CAGL79|TNRC18A	trinucleotide repeat containing 18	protein-coding
4090-5	chr9	127406989	127407517	+	15	NA	non-coding (NR_073416, exon 7 of 7)	non-coding (NR_073416, exon 7 of 7)	10084	NM_014580	29988		NM_014580	ENSG00000136856	SLC2A8	GLUT8|GLUTX1	solute carrier family 2 member 8	protein-coding
3800	chr14	101972094	101972902	+	15	NA	intron (NM_001376, intron 1 of 77)	intron (NM_001376, intron 1 of 77)	7925	NM_001376	1778		NM_001376	ENSG00000197102	DYNC1H1	CDCBM13|CMT2O|DHC1|DHC1a|DNCH1|DNCL|DNECL|DYHC|Dnchc1|HL-3|SMALED1|p22	dynein cytoplasmic 1 heavy chain 1	protein-coding
4609	chr5	166957408	166958145	+	15	NA	Intergenic	Intergenic	-31406	NR_108020	102557615		NR_108020	ENSG00000254130	LINC01947	CTB-7E3.1	long intergenic non-protein coding RNA 1947	ncRNA
6229	chr1	104057274	104057931	+	15	NA	Intergenic	L1P3|LINE|L1	-15421	NR_033990	100129138		NR_033990	ENSG00000293061	THAP3P1	-	THAP3 pseudogene 1	pseudo
9870	chr15	71738864	71739768	+	15	NA	intron (NM_024817, intron 10 of 16)	LTR65|LTR|ERV1	-47777	NR_120346	101929173		NR_120346		THSD4-AS2	-	THSD4 antisense RNA 2	ncRNA
8161	chr1	67832434	67833193	+	15	NA	intron (NR_040077, intron 1 of 9)	CpG	525	NR_040077	100289178		NR_040077	ENSG00000232284	GNG12-AS1	-	GNG12, DIRAS3 and WLS antisense RNA 1	ncRNA
4482-6	chr9	14096167	14097225	+	15	NA	intron (NR_161382, intron 7 of 7)	intron (NR_161382, intron 7 of 7)	84106	NM_001282787	4781		NM_005596	ENSG00000147862	NFIB	CTF|HMGIC/NFIB|MACID|NF-I/B|NF1-B|NFI-B|NFI-RED|NFIB2|NFIB3	nuclear factor I B	protein-coding
3584	chr6	10521812	10522041	+	15	NA	intron (NM_145649, intron 1 of 4)	AluSx|SINE|Alu	575	NM_145649	2651		NM_001491	ENSG00000111846	GCNT2	CCAT|CTRCT13|GCNT2C|GCNT5|IGNT|II|NACGT1|NAGCT1|ULG3|bA360O19.2|bA421M1.1	glucosaminyl (N-acetyl) transferase 2 (I blood group)	protein-coding
5525	chr12	26027411	26028064	+	15	NA	intron (NM_001164747, intron 2 of 5)	MIR|SINE|MIR	-24827	NM_001164746	11228		NM_007211	ENSG00000123094	RASSF8	C12orf2|HOJ1	Ras association domain family member 8	protein-coding
8149	chr1	99573015	99573419	+	15	NA	intron (NR_031666, intron 1 of 4)	intron (NR_031666, intron 1 of 4)	-72896	NM_017734	54873		NM_017734	ENSG00000099260	PALMD	C1orf11|PALML	palmdelphin	protein-coding
11048-2	chr3	38031091	38032127	+	15	NA	Intergenic	Intergenic	-1967	NM_006225	5333		NM_006225	ENSG00000187091	PLCD1	NDNC3|PLC-III	phospholipase C delta 1	protein-coding
3664	chr11	68751077	68751736	+	15	NA	intron (NM_001039656, intron 1 of 5)	CpG	114	NM_004923	9633		NM_004923	ENSG00000132749	TESMIN	CXCDC2|MTL5|MTLT	testis expressed metallothionein like protein	protein-coding
14703-2	chr11	117200484	117200923	+	15	NA	intron (NR_045215, intron 1 of 7)	intron (NR_045215, intron 1 of 7)	1211	NR_045215	100652768		NR_045215		LOC100652768	-	uncharacterized LOC100652768	ncRNA
8641-2	chr22	42800041	42800413	+	15	NA	intron (NM_001142293, intron 13 of 14)	intron (NM_001142293, intron 13 of 14)	57046	NM_014570	26286		NM_014570	ENSG00000242247	ARFGAP3	ARFGAP1	ADP ribosylation factor GTPase activating protein 3	protein-coding
6739-3	chr4	7159841	7160873	+	15	NA	Intergenic	Intergenic	-32181	NM_020777	57537		NM_020777	ENSG00000184985	SORCS2	-	sortilin related VPS10 domain containing receptor 2	protein-coding
7059	chr6	169722709	169723740	+	15	NA	intron (NM_133325, intron 1 of 11)	intron (NM_133325, intron 1 of 11)	1276	NM_018288	55274		NM_018288	ENSG00000130024	PHF10	BAF45A|SMARCG4|XAP135	PHD finger protein 10	protein-coding
17697	chr1	22809229	22809426	+	15	NA	intron (NM_017449, intron 3 of 15)	intron (NM_017449, intron 3 of 15)	53899	NR_036214	100422914		NR_036214	ENSG00000264014	MIR4253	-	microRNA 4253	ncRNA
4331-8	chrX	149720967	149721434	+	15	NA	Intergenic	HERVK22-int|LTR|ERVK	9140	NM_005366	4110		NM_005366	ENSG00000185247	MAGEA11	CT1.11|MAGE-11|MAGE11|MAGEA-11	MAGE family member A11	protein-coding
10205	chr14	24431288	24431389	+	15	NA	intron (NM_015299, intron 2 of 7)	MIRc|SINE|MIR	1384	NM_001290257	23351		NM_015299	ENSG00000100441	KHNYN	KIAA0323	KH and NYN domain containing	protein-coding
16496	chr16	70416793	70417525	+	15	NA	intron (NM_006927, intron 1 of 6)	MIRb|SINE|MIR	21941	NM_006927	6483		NM_006927	ENSG00000157350	ST3GAL2	Gal-NAc6S|SIAT4B|ST3GALII|ST3GalA.2	ST3 beta-galactoside alpha-2,3-sialyltransferase 2	protein-coding
6975	chr15	70493633	70495088	+	15	NA	Intergenic	MIR|SINE|MIR	11568	NR_146562	105370880		NR_146562	ENSG00000259473	LINC02205	-	long intergenic non-protein coding RNA 2205	ncRNA
4143-7	chr8	100290783	100291381	+	15	NA	intron (NM_001280539, intron 2 of 10)	MIRb|SINE|MIR	11111	NM_001353837	25897		NM_015435	ENSG00000034677	RNF19A	RNF19	ring finger protein 19A, RBR E3 ubiquitin protein ligase	protein-coding
3530	chr12	49511069	49511750	+	15	NA	intron (NM_001293285, intron 10 of 14)	intron (NM_001293285, intron 10 of 14)	-27621	NM_001314030	23416		NM_012284	ENSG00000135519	KCNH3	BEC1|ELK2|Kv12.2	potassium voltage-gated channel subfamily H member 3	protein-coding
3750-5	chr5	142828667	142829344	+	15	NA	intron (NM_001349547, intron 1 of 21)	intron (NM_001349547, intron 1 of 21)	39905	NR_046680	100874239		NR_046680	ENSG00000226272	ARHGAP26-AS1	-	ARHGAP26 antisense RNA 1	ncRNA
18037	chr9	106861000	106861760	+	15	NA	Intergenic	Intergenic	-1786	NM_021224	58499		NM_021224	ENSG00000148143	ZNF462	WSKA|ZFPIP|Zfp462	zinc finger protein 462	protein-coding
6065	chr12	52016460	52016996	+	15	NA	TTS (NM_181711)	TTS (NM_181711)	-6104	NM_001202233	3164		NM_002135	ENSG00000123358	NR4A1	GFRP1|HMR|N10|NAK-1|NGFIB|NP10|NUR77|TR3	nuclear receptor subfamily 4 group A member 1	protein-coding
6736-2	chr2	18104487	18105378	+	15	NA	Intergenic	Intergenic	226265	NM_002252	3790		NM_002252	ENSG00000170745	KCNS3	KV9.3	potassium voltage-gated channel modifier subfamily S member 3	protein-coding
14810	chr14	99682833	99683439	+	15	NA	Intergenic	Intergenic	-1162	NM_006668	10858		NM_006668	ENSG00000036530	CYP46A1	CP46|CYP46	cytochrome P450 family 46 subfamily A member 1	protein-coding
9452	chr18	28789021	28789968	+	15	NA	Intergenic	Intergenic	-612364	NM_001792	1000		NM_001792	ENSG00000170558	CDH2	ACOGS|ADHD8|ARVD14|CD325|CDHN|CDw325|NCAD	cadherin 2	protein-coding
9879-2	chr18	74511749	74512622	+	15	NA	intron (NM_001370254, intron 6 of 11)	intron (NM_001370254, intron 6 of 11)	12597	NM_001168499	55748		NM_018235	ENSG00000133313	CNDP2	CN2|CPGL|HEL-S-13|HsT2298|PEPA	carnosine dipeptidase 2	protein-coding
8605-2	chr5	79495226	79495826	+	15	NA	intron (NM_001277077, intron 1 of 5)	L2c|LINE|L2	18310	NM_001277077	9456		NM_004272	ENSG00000152413	HOMER1	HOMER|HOMER1A|HOMER1B|HOMER1C|SYN47|Ves-1	homer scaffold protein 1	protein-coding
4467-2	chr5	160009125	160009551	+	15	NA	intron (NM_003314, intron 1 of 7)	intron (NM_003314, intron 1 of 7)	199	NM_003314	7265		NM_003314	ENSG00000113312	TTC1	TPR1	tetratricopeptide repeat domain 1	protein-coding
4569-2	chr13	49810582	49811686	+	15	NA	Intergenic	Intergenic	-18452	NM_002267	3839		NM_002267	ENSG00000102753	KPNA3	IPOA4|SPG88|SRP1|SRP1gamma|SRP4|hSRP1	karyopherin subunit alpha 3	protein-coding
6557-3	chrX	27565550	27566506	+	15	NA	Intergenic	MER61E|LTR|ERV1	-24316	NR_148432	347442		NM_001136533	ENSG00000189186	DCAF8L2	WDR42C	DDB1 and CUL4 associated factor 8 like 2	protein-coding
4537-5	chr2	60335710	60336260	+	15	NA	Intergenic	Intergenic	47051	NR_132991	106660609		NR_132991	ENSG00000228590	MIR4432HG	-	MIR4432 host gene	ncRNA
2280	chr1	8020019	8020342	+	15	NA	intron (NM_018948, intron 1 of 3)	intron (NM_018948, intron 1 of 3)	6129	NM_018948	54206		NM_018948	ENSG00000116285	ERRFI1	GENE-33|MIG-6|MIG6|RALT	ERBB receptor feedback inhibitor 1	protein-coding
10003-3	chr22	38319038	38319586	+	15	NA	intron (NM_001289912, intron 5 of 14)	intron (NM_001289912, intron 5 of 14)	-1228	NM_001894	1454		NM_001894	ENSG00000213923	CSNK1E	CKIe|CKIepsilon|HCKIE	casein kinase 1 epsilon	protein-coding
4761	chr13	30395049	30395629	+	15	NA	Intergenic	Intergenic	-21425	NR_024464	100188949		NR_024464	ENSG00000238121	LINC00426	-	long intergenic non-protein coding RNA 426	ncRNA
8149-2	chr1	99573675	99574727	+	15	NA	intron (NR_031666, intron 1 of 4)	intron (NR_031666, intron 1 of 4)	-71912	NM_017734	54873		NM_017734	ENSG00000099260	PALMD	C1orf11|PALML	palmdelphin	protein-coding
7119	chr11	16397373	16398443	+	15	NA	intron (NM_001367872, intron 3 of 16)	intron (NM_001367872, intron 3 of 16)	4955	NM_017508	55553		NM_017508	ENSG00000110693	SOX6	HSSOX6|SOXD|TOLCAS	SRY-box transcription factor 6	protein-coding
3215-2	chr16	58850104	58850525	+	15	NA	Intergenic	Intergenic	-115998	NM_001286220	2806		NM_002080	ENSG00000125166	GOT2	DEE82|KAT4|KATIV|KYAT4|mitAAT	glutamic-oxaloacetic transaminase 2	protein-coding
8177	chr8	103207952	103208970	+	15	NA	intron (NM_001364874, intron 2 of 3)	Charlie15a|DNA|hAT-Charlie	-36321	NR_109954	100499183		NR_034092		BAALC-AS1	FZD6-DT|lncFZD6	BAALC antisense RNA 1	ncRNA
7901-2	chr20	18415940	18416952	+	15	NA	intron (NM_001351684, intron 10 of 20)	L2c|LINE|L2	37397	NR_034167	440757		NM_001004344	ENSG00000237282	LINC00851	DZANK1-AS1	long intergenic non-protein coding RNA 851	ncRNA
4860-3	chr22	38923786	38924517	+	15	NA	Intergenic	MLT1K|LTR|ERVL-MaLR	-33371	NM_001193289	100913187		NM_001193289		APOBEC3A_B	A3A|APOBEC3A	APOBEC3A and APOBEC3B deletion hybrid	protein-coding
8386-2	chr4	24472795	24473631	+	15	NA	promoter-TSS (NM_001330752)	promoter-TSS (NM_001330752)	-308	NM_001330751	10891		NM_013261	ENSG00000109819	PPARGC1A	LEM6|PGC-1(alpha)|PGC-1alpha|PGC-1v|PGC1|PGC1A|PPARGC1	PPARG coactivator 1 alpha	protein-coding
10535	chr21	26148039	26149541	+	15	NA	intron (NM_001136131, intron 1 of 15)	MIRb|SINE|MIR	-8400	NM_001136016	351		NM_000484	ENSG00000142192	APP	AAA|ABETA|ABPP|AD1|APPI|CTFgamma|CVAP|PN-II|PN2|alpha-sAPP|preA4	amyloid beta precursor protein	protein-coding
6024	chr15	41960718	41961563	+	15	NA	intron (NM_139265, intron 1 of 5)	intron (NM_139265, intron 1 of 5)	11417	NM_139265	30844		NM_139265	ENSG00000103966	EHD4	PAST4	EH domain containing 4	protein-coding
21519	chr16	74412090	74412617	+	15	NA	intron (NM_001385192, intron 7 of 12)	intron (NM_001385192, intron 7 of 12)	-5134	NR_135170	105376772		NR_135170		LOC105376772	-	uncharacterized LOC105376772	ncRNA
21941	chr22	23528996	23529971	+	15	NA	Intergenic	L2c|LINE|L2	-8619	NR_109832	101978785		NR_109832		PCAT14	-	prostate cancer associated transcript 14	ncRNA
3588-3	chr14	100241041	100241147	+	15	NA	intron (NM_003403, intron 1 of 4)	intron (NM_003403, intron 1 of 4)	1950	NM_003403	7528		NM_003403	ENSG00000100811	YY1	DELTA|GADEVS|INO80S|NF-E1|UCRBP|YIN-YANG-1	YY1 transcription factor	protein-coding
9681	chr5	142108520	142109722	+	15	NA	intron (NM_030571, intron 1 of 7)	CpG	342	NM_030571	80762		NM_030571	ENSG00000131507	NDFIP1	N4WBP5	Nedd4 family interacting protein 1	protein-coding
15359	chr12	32827958	32830497	+	15	NA	intron (NM_004572, intron 7 of 13)	intron (NM_004572, intron 7 of 13)	67550	NM_001005242	5318		NM_004572	ENSG00000057294	PKP2	ARVD9	plakophilin 2	protein-coding
7941	chr3	39141104	39142110	+	15	NA	TTS (NM_001320560)	TTS (NM_001320560)	3401	NR_106880	102466743		NR_106880	ENSG00000284158	MIR6822	hsa-mir-6822	microRNA 6822	ncRNA
9020	chr13	26957046	26958164	+	15	NA	Intergenic	Intergenic	-167928	NR_046547	100874070		NR_046547		USP12-AS1	-	USP12 antisense RNA 1	ncRNA
12103	chr19	56116734	56117651	+	15	NA	intron (NM_001351682, intron 1 of 1)	MIRc|SINE|MIR	4103	NM_001002836	126208		NM_001002836	ENSG00000142409	ZNF787	TIP20	zinc finger protein 787	protein-coding
5618-3	chr8	8571675	8572486	+	15	NA	Intergenic	Intergenic	-129857	NM_194284	137075		NM_194284	ENSG00000253958	CLDN23	CLDNL|hCG1646163	claudin 23	protein-coding
7295	chr22	27433437	27434022	+	15	NA	Intergenic	Intergenic	123078	NR_134581	100507657		NR_134581	ENSG00000226741	LINC02554	-	long intergenic non-protein coding RNA 2554	ncRNA
8414	chr2	191150477	191151451	+	15	NA	promoter-TSS (NM_003151)	promoter-TSS (NM_003151)	30	NM_003151	6775		NM_003151	ENSG00000138378	STAT4	DPMC|SLEB11	signal transducer and activator of transcription 4	protein-coding
5176	chr1	98279747	98280454	+	15	NA	Intergenic	Intergenic	69389	NR_046088	729987		NR_046088	ENSG00000226053	LINC01776	-	long intergenic non-protein coding RNA 1776	ncRNA
6021	chr9	131732152	131732368	+	15	NA	intron (NM_001377935, intron 1 of 26)	intron (NM_001377935, intron 1 of 26)	5187	NM_005312	2889		NM_005312	ENSG00000107263	RAPGEF1	C3G|GRF2	Rap guanine nucleotide exchange factor 1	protein-coding
20219	chr11	118656261	118657031	+	15	NA	TTS (NM_001301065)	TTS (NM_001301065)	12646	NR_106773	102466719		NR_106773	ENSG00000284246	MIR6716	hsa-mir-6716	microRNA 6716	ncRNA
15570	chr1	20474690	20475429	+	15	NA	Intergenic	Intergenic	11151	NM_018584	55450		NM_018584	ENSG00000162545	CAMK2N1	PRO1489	calcium/calmodulin dependent protein kinase II inhibitor 1	protein-coding
9879-4	chr18	74513749	74513809	+	15	NA	intron (NM_001370254, intron 8 of 11)	intron (NM_001370254, intron 8 of 11)	14191	NM_001168499	55748		NM_018235	ENSG00000133313	CNDP2	CN2|CPGL|HEL-S-13|HsT2298|PEPA	carnosine dipeptidase 2	protein-coding
10692	chr10	72031619	72031852	+	15	NA	Intergenic	MIRb|SINE|MIR	56816	NM_001244950	9806		NM_014767	ENSG00000107742	SPOCK2	testican-2	SPARC (osteonectin), cwcv and kazal like domains proteoglycan 2	protein-coding
9462-2	chr5	141522543	141522934	+	15	NA	intron (NM_001314007, intron 27 of 28)	intron (NM_001314007, intron 27 of 28)	33497	NM_032407	56097		NM_018929	ENSG00000240764	PCDHGC5	PCDH-GAMMA-C5	protocadherin gamma subfamily C, 5	protein-coding
3767-2	chr20	50101686	50102178	+	15	NA	intron (NM_001282579, intron 1 of 4)	intron (NM_001282579, intron 1 of 4)	11218	NM_001282577	7335		NM_021988	ENSG00000244687	UBE2V1	CIR1|CROC-1|CROC1|UBE2V|UEV-1|UEV1|UEV1A	ubiquitin conjugating enzyme E2 V1	protein-coding
9102-2	chr3	32360132	32360589	+	15	NA	intron (NM_178868, intron 2 of 3)	intron (NM_178868, intron 2 of 3)	-31493	NM_138410	112616		NM_138410	ENSG00000153551	CMTM7	CKLFSF7	CKLF like MARVEL transmembrane domain containing 7	protein-coding
5735-2	chr6	24378006	24379115	+	15	NA	intron (NM_001195610, intron 1 of 10)	LTR16A2|LTR|ERVL	4732	NM_001195610	51473		NM_016356	ENSG00000146038	DCDC2	DCDC2A|DFNB66|NPHP19|NSC|RU2|RU2S	doublecortin domain containing 2	protein-coding
6239-2	chrX	36018851	36019681	+	15	NA	intron (NM_001304548, intron 22 of 63)	LTR22B2|LTR|ERVK	99532	NM_001304548	286464		NM_152632	ENSG00000165164	CFAP47	CHDC2|CXorf22|CXorf30|CXorf59|SPGF52|SPGFX3	cilia and flagella associated protein 47	protein-coding
3689	chr1	149610418	149610540	+	15	NA	intron (NR_111950, intron 1 of 8)	intron (NR_111950, intron 1 of 8)	3467	NR_111951	57234		NR_046135	ENSG00000291158	LINC00869	FAM91A2	long intergenic non-protein coding RNA 869	ncRNA
3243-4	chr6	146131540	146132021	+	15	NA	intron (NM_001278065, intron 2 of 9)	L2c|LINE|L2	102582	NM_001278066	2911		NM_000838	ENSG00000152822	GRM1	GPRC1A|MGLU1|MGLUR1|PPP1R85|SCA44|SCAR13	glutamate metabotropic receptor 1	protein-coding
7513-2	chr19	583570	584595	+	15	NA	TTS (NM_198589)	TTS (NM_198589)	-5799	NM_001194	610		NM_001194	ENSG00000099822	HCN2	BCNG-2|BCNG2|EIG17|FEB2|GEFSP11|HAC-1	hyperpolarization activated cyclic nucleotide gated potassium and sodium channel 2	protein-coding
9879-3	chr18	74512735	74513588	+	15	NA	intron (NM_001370254, intron 7 of 11)	MIR|SINE|MIR	13573	NM_001168499	55748		NM_018235	ENSG00000133313	CNDP2	CN2|CPGL|HEL-S-13|HsT2298|PEPA	carnosine dipeptidase 2	protein-coding
7836	chr2	101255600	101256820	+	15	NA	intron (NM_017546, intron 1 of 6)	intron (NM_017546, intron 1 of 6)	3324	NM_017546	55571		NM_017546	ENSG00000158435	CNOT11	C2orf29|C40	CCR4-NOT transcription complex subunit 11	protein-coding
3370-3	chr1	154000472	154001005	+	15	NA	intron (NM_001159484, intron 35 of 37)	Tigger7|DNA|TcMar-Tigger	9976	NM_001030	6232		NM_001030	ENSG00000177954	RPS27	DBA17|MPS-1|MPS1|S27|eS27	ribosomal protein S27	protein-coding
5853-3	chr19	41135404	41136190	+	15	NA	Intergenic	CpG	21365	NR_135528	1572		NM_000774	ENSG00000197446	CYP2F1	C2F1|CYP2F|CYPIIF1	cytochrome P450 family 2 subfamily F member 1	protein-coding
10813-2	chr15	34585236	34585521	+	15	NA	Intergenic	Intergenic	-1727	NM_001023567	440270		NM_001023567	ENSG00000215252	GOLGA8B	GOLGA5	golgin A8 family member B	protein-coding
6052	chr14	81310898	81311505	+	15	NA	intron (NM_001256430, intron 5 of 7)	intron (NM_001256430, intron 5 of 7)	-89811	NM_201595	2957		NM_015859	ENSG00000165417	GTF2A1	TF2A1|TFIIA|TFIIA-42|TFIIAL	general transcription factor IIA subunit 1	protein-coding
7290-2	chr5	16743085	16743616	+	15	NA	intron (NM_012334, intron 19 of 40)	intron (NM_012334, intron 19 of 40)	-126292	NM_001034850	54463		NM_019000	ENSG00000154153	RETREG1	FAM134B|JK-1|JK1	reticulophagy regulator 1	protein-coding
5096-2	chr11	92357139	92357653	+	15	NA	intron (NM_001367949, intron 2 of 27)	intron (NM_001367949, intron 2 of 27)	132578	NM_001008781	120114		NM_001008781	ENSG00000165323	FAT3	CDHF15|CDHR10|hFat3	FAT atypical cadherin 3	protein-coding
7136	chr17	72382854	72383938	+	15	NA	Intergenic	Intergenic	40585	NR_135222	146795		NR_135222	ENSG00000264026	LINC02003	-	long intergenic non-protein coding RNA 2003	ncRNA
4498-2	chr3	74360316	74360883	+	15	NA	intron (NM_020872, intron 10 of 21)	MLT1E2|LTR|ERVL-MaLR	160541	NM_020872	5067		NM_020872	ENSG00000113805	CNTN3	BIG-1|PANG|PCS	contactin 3	protein-coding
4740	chr15	84531745	84532704	+	15	NA	intron (NR_003661, intron 5 of 5)	intron (NR_003661, intron 5 of 5)	-15377	NR_003246	374650		NM_198079		GOLGA6L5P	GOLGA6L5|GOLGA6L8	golgin A6 family like 5, pseudogene	pseudo
5357	chr2	105600913	105601675	+	15	NA	intron (NR_038891, intron 1 of 3)	MER49|LTR|ERV1	9265	NR_038891	285000		NR_038891		LINC02946	RMEL1	long intergenic non-protein coding RNA 2946	ncRNA
3269-7	chr2	196957916	196957935	+	15	NA	Intergenic	Intergenic	-31218	NM_001321100	80055		NM_024989	ENSG00000197121	PGAP1	Bst1|ISPD3024|MRT42|NEDDSBA|SPG67	post-GPI attachment to proteins inositol deacylase 1	protein-coding
4994-3	chr3	114745236	114746353	+	15	NA	intron (NM_001164343, intron 4 of 11)	(TAA)n|Simple_repeat|Simple_repeat	-2269	NR_039959	100616166		NR_039959	ENSG00000264623	MIR4796	mir-4796	microRNA 4796	ncRNA
11653	chr22	50301699	50303278	+	15	NA	promoter-TSS (NM_001376877)	promoter-TSS (NM_001376877)	-819	NM_001376877	23654		NM_012401	ENSG00000196576	PLXNB2	MM1|Nbla00445|PLEXB2|dJ402G11.3|lncFAL	plexin B2	protein-coding
10813	chr15	34583134	34583245	+	15	NA	intron (NR_027410, intron 1 of 23)	CpG	381	NR_027410	440270		NM_001023567	ENSG00000215252	GOLGA8B	GOLGA5	golgin A8 family member B	protein-coding
7743-3	chr9	126146459	126146921	+	15	NA	Intergenic	MER74A|LTR|ERVL	129225	NR_121584	101929116		NR_121584	ENSG00000288537	LOC101929116	-	uncharacterized LOC101929116	ncRNA
6430-3	chr20	53677672	53678629	+	15	NA	Intergenic	Intergenic	69796	NR_134576	105372672		NR_134576	ENSG00000235415	LOC105372672	-	uncharacterized LOC105372672	ncRNA
5391-3	chr20	52031381	52032160	+	15	NA	Intergenic	Intergenic	73714	NM_001319146	55734		NM_018197	ENSG00000020256	ZFP64	ZNF338	ZFP64 zinc finger protein	protein-coding
5848-3	chr14	100115952	100116003	+	15	NA	intron (NM_016337, intron 3 of 13)	MIR3|SINE|MIR	6322	NR_029888	442909		NR_029888	ENSG00000199082	MIR342	MIRN342|hsa-mir-342	microRNA 342	ncRNA
4710-3	chr6	37920454	37921357	+	15	NA	intron (NM_021943, intron 1 of 5)	intron (NM_021943, intron 1 of 5)	101178	NM_021943	60685		NM_021943	ENSG00000156639	ZFAND3	TEX27	zinc finger AN1-type containing 3	protein-coding
5879-4	chr4	88456516	88457706	+	15	NA	promoter-TSS (NM_016323)	promoter-TSS (NM_016323)	-8	NM_016323	51191		NM_016323	ENSG00000138646	HERC5	CEB1|CEBP1	HECT and RLD domain containing E3 ubiquitin protein ligase 5	protein-coding
7383	chr1	47179189	47179633	+	15	NA	non-coding (NR_047498, exon 1 of 2)	non-coding (NR_047498, exon 1 of 2)	161	NR_047498	100874253		NR_047498	ENSG00000224805	LINC00853	PDZK1IP1-AS1|ncRNA-a4	long intergenic non-protein coding RNA 853	ncRNA
3276-5	chr4	110371488	110371776	+	15	NA	Intergenic	Intergenic	-104523	NR_166842	2028		NM_001977	ENSG00000138792	ENPEP	APA|CD249|gp160	glutamyl aminopeptidase	protein-coding
11516	chr12	4136298	4136421	+	15	NA	Intergenic	Intergenic	-137403	NM_001759	894		NM_001759	ENSG00000118971	CCND2	KIAK0002|MPPH3	cyclin D2	protein-coding
4541-2	chr20	53162270	53162823	+	15	NA	intron (NM_173485, intron 1 of 2)	intron (NM_173485, intron 1 of 2)	-22737	NM_001193421	128553		NM_173485	ENSG00000182463	TSHZ2	C20orf17|OVC10-2|TSH2|ZABC2|ZNF218	teashirt zinc finger homeobox 2	protein-coding
22651	chr17	78266327	78267412	+	15	NA	intron (NR_073178, intron 4 of 6)	intron (NR_073178, intron 4 of 6)	11623	NR_073178	100996291		NR_073178	ENSG00000204277	LINC01993	-	long intergenic non-protein coding RNA 1993	ncRNA
6205-3	chr5	144487353	144488259	+	15	NA	Intergenic	Intergenic	282415	NM_001370487	57528		NM_020768	ENSG00000183775	KCTD16	-	potassium channel tetramerization domain containing 16	protein-coding
10028	chr11	126080461	126081088	+	15	NA	Intergenic	Intergenic	-17482	NM_001243597	50937		NM_016952	ENSG00000064309	CDON	CDO|CDON1|HPE11|Ihog|ORCAM	cell adhesion associated, oncogene regulated	protein-coding
13099	chr9	136857480	136858119	+	15	NA	intron (NM_206920, intron 19 of 26)	intron (NM_206920, intron 19 of 26)	5453	NM_206920	158056		NM_206920	ENSG00000177943	MAMDC4	AEGP|EDTB	MAM domain containing 4	protein-coding
5117	chr6	79577845	79578440	+	15	NA	Intergenic	L1PA6|LINE|L1	-40712	NM_001122769	167691		NM_181714	ENSG00000135338	LCA5	C6orf152	lebercilin LCA5	protein-coding
4359	chr17	82751776	82752316	+	15	NA	promoter-TSS (NM_005993)	promoter-TSS (NM_005993)	-19	NM_005993	6904		NM_005993	ENSG00000141556	TBCD	PEBAT|SSD-1|tfcD	tubulin folding cofactor D	protein-coding
21961	chr17	50113464	50113788	+	15	NA	intron (NM_174920, intron 10 of 10)	intron (NM_174920, intron 10 of 10)	16534	NM_001257359	201191		NM_174920	ENSG00000167100	SAMD14	-	sterile alpha motif domain containing 14	protein-coding
4495-2	chr2	105873506	105874198	+	15	NA	intron (NM_001004722, intron 3 of 3)	intron (NM_001004722, intron 3 of 3)	22005	NM_001004720	8440		NM_003581	ENSG00000071051	NCK2	GRB4|NCKbeta	NCK adaptor protein 2	protein-coding
4547	chr3	122393979	122394687	+	15	NA	intron (NM_014367, intron 1 of 4)	L1MB7|LINE|L1	10151	NM_014367	26355		NM_014367	ENSG00000114023	FAM162A	C3orf28|E2IG5|HGTD-P	family with sequence similarity 162 member A	protein-coding
2664-5	chr3	71205543	71205856	+	15	NA	intron (NM_001012505, intron 5 of 6)	intron (NM_001012505, intron 5 of 6)	39378	NM_001244814	27086		NM_032682	ENSG00000114861	FOXP1	12CC4|HSPC215|MFH|QRF1|hFKH1B	forkhead box P1	protein-coding
4220	chr11	106480587	106481117	+	15	NA	Intergenic	L2c|LINE|L2	229445	NR_120551	101928535		NR_120551	ENSG00000290498	LOC101928535	-	uncharacterized LOC101928535	ncRNA
4319-5	chr4	124929017	124929624	+	15	NA	Intergenic	Intergenic	-216588	NM_020337	57182		NM_020337	ENSG00000151458	ANKRD50	-	ankyrin repeat domain containing 50	protein-coding
9998	chr10	34231448	34232448	+	15	NA	intron (NM_019619, intron 22 of 24)	intron (NM_019619, intron 22 of 24)	-459268	NR_038932	100505583		NR_038932	ENSG00000261683	LINC00838	-	long intergenic non-protein coding RNA 838	ncRNA
6974	chr4	172925454	172926364	+	15	NA	intron (NM_001034845, intron 8 of 12)	intron (NM_001034845, intron 8 of 12)	-199031	NR_125894	101928314		NR_125894		GALNTL6-AS1	-	GALNTL6 antisense RNA 1	ncRNA
14782	chr17	40325410	40328343	+	15	NA	intron (NM_001145301, intron 1 of 8)	intron (NM_001145301, intron 1 of 8)	8631	NM_001145301	5914		NM_000964	ENSG00000131759	RARA	NR1B1|RAR|RARalpha	retinoic acid receptor alpha	protein-coding
7123-2	chr4	123599539	123600495	+	15	NA	Intergenic	(CTTCCT)n|Simple_repeat|Simple_repeat	-49974	NR_027105	285419		NR_027105	ENSG00000249464	LINC01091	-	long intergenic non-protein coding RNA 1091	ncRNA
6410	chr11	64996598	64996601	+	15	NA	intron (NM_138456, intron 1 of 2)	intron (NM_138456, intron 1 of 2)	372	NM_138456	116071		NM_138456	ENSG00000168062	BATF2	SARI	basic leucine zipper ATF-like transcription factor 2	protein-coding
4532-2	chr14	74502084	74502564	+	15	NA	intron (NM_000428, intron 34 of 35)	intron (NM_000428, intron 34 of 35)	8559	NM_194279	122961		NM_194279	ENSG00000165898	ISCA2	HBLD1|ISA2|MMDS4|c14_5557	iron-sulfur cluster assembly 2	protein-coding
9834-2	chr22	46770349	46770861	+	15	NA	intron (NR_104292, intron 2 of 13)	intron (NR_104292, intron 2 of 13)	-3322	NM_001284305	25771		NM_014346	ENSG00000054611	TBC1D22A	C22orf4|HSC79E021	TBC1 domain family member 22A	protein-coding
10975	chr16	67445797	67446443	+	15	NA	intron (NM_004691, intron 2 of 7)	intron (NM_004691, intron 2 of 7)	14999	NM_000196	3291		NM_000196	ENSG00000176387	HSD11B2	AME|AME1|HSD11K|HSD2|SDR9C3	hydroxysteroid 11-beta dehydrogenase 2	protein-coding
7008	chr1	160949298	160950351	+	15	NA	TTS (NR_110695)	TTS (NR_110695)	4985	NM_080878	142683		NM_080878	ENSG00000158764	ITLN2	HL-2|HL2	intelectin 2	protein-coding
5875	chr20	53863377	53864532	+	15	NA	Intergenic	A-rich|Low_complexity|Low_complexity	11755	NR_002189	391257		NR_002189		SUMO1P1	PIC1L|UBL2|UBL6	SUMO1 pseudogene 1	pseudo
23468	chr19	38706898	38706899	+	15	NA	intron (NM_004924, intron 5 of 20)	intron (NM_004924, intron 5 of 20)	37576	NM_144691	147968		NM_144691	ENSG00000182472	CAPN12	-	calpain 12	protein-coding
5162	chr10	17118897	17119167	+	15	NA	intron (NM_001081, intron 6 of 66)	intron (NM_001081, intron 6 of 66)	10779	NM_001081	8029		NM_001081	ENSG00000107611	CUBN	IFCR|IGS|IGS1|MGA1|gp280	cubilin	protein-coding
8286	chr10	47582691	47583823	+	15	NA	intron (NR_033407, intron 1 of 3)	intron (NR_033407, intron 1 of 3)	162	NR_033407	1517		NR_033407		CTSLP2	CTSL1P2|CTSL1P5|CTSL1P7|CTSLL2|CTSLL5|CTSLL7|CTSLP5|CTSLP7|bA144G6.6|bA342C24.4	cathepsin L pseudogene 2	pseudo
28301	chr2	54591398	54592168	+	15	NA	intron (NM_178313, intron 1 of 30)	intron (NM_178313, intron 1 of 30)	33389	NM_178313	6711		NM_003128	ENSG00000115306	SPTBN1	DDISBA|ELF|HEL102|SPTB2|betaSpII	spectrin beta, non-erythrocytic 1	protein-coding
8937	chr10	107803547	107804613	+	15	NA	Intergenic	MLT1H|LTR|ERVL-MaLR	265213	NR_125760	103695365		NR_125760	ENSG00000229981	LINC01435	TCONS_00018040	long intergenic non-protein coding RNA 1435	ncRNA
3743	chr12	41605964	41606603	+	15	NA	Intergenic	Intergenic	-157906	NR_135041	101927038		NR_135040	ENSG00000257784	LINC02400	-	long intergenic non-protein coding RNA 2400	ncRNA
8198	chr10	73110163	73111307	+	15	NA	intron (NM_001283015, intron 1 of 7)	intron (NM_001283015, intron 1 of 7)	280	NM_001283014	25961		NM_015901	ENSG00000166321	NUDT13	-	nudix hydrolase 13	protein-coding
6363	chr4	140653686	140654664	+	15	NA	intron (NM_015130, intron 13 of 20)	LTR10D|LTR|ERV1	-11095	NR_077215	644962		NR_077215		TNRC18P1	-	trinucleotide repeat containing 18 pseudogene 1	pseudo
3801-4	chr18	28080854	28081329	+	15	NA	intron (NM_001792, intron 2 of 15)	intron (NM_001792, intron 2 of 15)	-44450	NM_001308176	1000		NM_001792	ENSG00000170558	CDH2	ACOGS|ADHD8|ARVD14|CD325|CDHN|CDw325|NCAD	cadherin 2	protein-coding
4864	chr11	69423411	69423932	+	15	NA	Intergenic	Intergenic	-1984	NM_001319657	102724265		NM_001319657	ENSG00000255980	LINC02953	-	long intergenic non-protein coding RNA 2953	ncRNA
16265	chr1	204622546	204622564	+	15	NA	intron (NM_201630, intron 1 of 1)	intron (NM_201630, intron 1 of 1)	63183	NM_006338	10446		NM_006338	ENSG00000170382	LRRN2	FIGLER7|GAC1|LRANK1|LRRN5	leucine rich repeat neuronal 2	protein-coding
9452-3	chr18	28791290	28791348	+	15	NA	Intergenic	Intergenic	-614189	NM_001792	1000		NM_001792	ENSG00000170558	CDH2	ACOGS|ADHD8|ARVD14|CD325|CDHN|CDw325|NCAD	cadherin 2	protein-coding
8428	chr6	167306638	167307277	+	15	NA	intron (NM_018974, intron 6 of 7)	intron (NM_018974, intron 6 of 7)	15642	NM_018974	54346		NM_018974	ENSG00000112494	UNC93A	Unc-93A|dJ366N23.1|dJ366N23.2	unc-93 homolog A	protein-coding
9834	chr22	46768658	46768726	+	15	NA	intron (NR_104292, intron 2 of 13)	MamRTE1|LINE|RTE-BovB	4950	NR_104292	25771		NM_014346	ENSG00000054611	TBC1D22A	C22orf4|HSC79E021	TBC1 domain family member 22A	protein-coding
2940-2	chr17	23015905	23016576	+	15	NA	Intergenic	ALR/Alpha|Satellite|centr	493129	NM_001190452	100462977		NM_001190452		MTRNR2L1	HN1	MT-RNR2 like 1 (pseudogene)	pseudo
14703	chr11	117199238	117200009	+	15	NA	5' UTR (NM_001001522, exon 1 of 5)	5' UTR (NM_001001522, exon 1 of 5)	253	NM_003186	6876		NM_003186	ENSG00000149591	TAGLN	SM22|SM22-alpha|SMCC|TAGLN1|TGLN|WS3-10	transgelin	protein-coding
11048	chr3	38029629	38030163	+	15	NA	promoter-TSS (NM_006225)	promoter-TSS (NM_006225)	-254	NM_006225	5333		NM_006225	ENSG00000187091	PLCD1	NDNC3|PLC-III	phospholipase C delta 1	protein-coding
5848-2	chr14	100115256	100115671	+	15	NA	intron (NM_016337, intron 3 of 13)	intron (NM_016337, intron 3 of 13)	5808	NR_029888	442909		NR_029888	ENSG00000199082	MIR342	MIRN342|hsa-mir-342	microRNA 342	ncRNA
8981	chr19	16092268	16092679	+	15	NA	intron (NM_001367837, intron 5 of 7)	intron (NM_001367837, intron 5 of 7)	15457	NM_001367838	7171		NM_003290	ENSG00000167460	TPM4	BDPLT25|HEL-S-108	tropomyosin 4	protein-coding
3238-8	chr6	89443626	89444240	+	15	NA	intron (NM_014942, intron 1 of 15)	intron (NM_014942, intron 1 of 15)	10755	NM_014942	22881		NM_014942	ENSG00000135299	ANKRD6	-	ankyrin repeat domain 6	protein-coding
6652	chr15	99986343	99987407	+	15	NA	intron (NM_139057, intron 20 of 21)	intron (NM_139057, intron 20 of 21)	179852	NR_135737	400464		NM_001013670		LOC400464	-	ubiquitin conjugating enzyme E2 Q2 pseudogene	pseudo
8386	chr4	24471319	24471778	+	15	NA	intron (NR_148983, intron 1 of 15)	CpG	1357	NR_148985	10891		NM_013261	ENSG00000109819	PPARGC1A	LEM6|PGC-1(alpha)|PGC-1alpha|PGC-1v|PGC1|PGC1A|PPARGC1	PPARG coactivator 1 alpha	protein-coding
11469	chr16	81732277	81732379	+	15	NA	Intergenic	AluJr|SINE|Alu	-46963	NM_002661	5336		NM_002661	ENSG00000197943	PLCG2	APLAID|FCAS3|PLC-IV|PLC-gamma-2	phospholipase C gamma 2	protein-coding
7982	chr15	91141814	91142549	+	15	NA	intron (NM_001323040, intron 2 of 12)	intron (NM_001323040, intron 2 of 12)	40385	NM_001323039	9899		NM_014848	ENSG00000185518	SV2B	HsT19680|SLC22B2	synaptic vesicle glycoprotein 2B	protein-coding
9510	chr1	85580964	85581797	+	15	NA	exon (NM_001554, exon 2 of 5)	exon (NM_001554, exon 2 of 5)	619	NM_001554	3491		NM_001554	ENSG00000142871	CCN1	CYR61|GIG1|IGFBP10	cellular communication network factor 1	protein-coding
5376	chr3	42601853	42602103	+	15	NA	promoter-TSS (NM_001201572)	promoter-TSS (NM_001201572)	-900	NM_001201572	9117		NM_004206	ENSG00000093183	SEC22C	SEC22L3	SEC22 homolog C, vesicle trafficking protein	protein-coding
7218-2	chr5	156646852	156647585	+	15	NA	intron (NM_000337, intron 6 of 8)	intron (NM_000337, intron 6 of 8)	-203077	NM_206858	153743		NM_206858	ENSG00000231989	PPP1R2B	PPP1R2P3	PPP1R2 family member B	protein-coding
5074	chr1	161971824	161972303	+	15	NA	Intergenic	Intergenic	52402	NM_001347700	25903		NM_015441	ENSG00000162745	OLFML2B	-	olfactomedin like 2B	protein-coding
8755-2	chr17	75382735	75383808	+	15	NA	intron (NM_203506, intron 2 of 4)	intron (NM_203506, intron 2 of 4)	22407	NM_002086	2885		NM_002086	ENSG00000177885	GRB2	ASH|EGFRBP-GRB2|Grb3-3|MST084|MSTP084|NCKAP2	growth factor receptor bound protein 2	protein-coding
7445	chr8	100788867	100789748	+	15	NA	Intergenic	L2c|LINE|L2	-67219	NM_002568	26986		NM_002568	ENSG00000070756	PABPC1	PAB1|PABP|PABP1|PABPC2|PABPL1	poly(A) binding protein cytoplasmic 1	protein-coding
5220-2	chr16	14012798	14014276	+	15	NA	intron (NR_110909, intron 1 of 2)	intron (NR_110909, intron 1 of 2)	2481	NR_110909	101927311		NR_110909		LINC02185	-	long intergenic non-protein coding RNA 2185	ncRNA
7513-3	chr19	585183	585262	+	15	NA	Intergenic	Intergenic	-4659	NM_001194	610		NM_001194	ENSG00000099822	HCN2	BCNG-2|BCNG2|EIG17|FEB2|GEFSP11|HAC-1	hyperpolarization activated cyclic nucleotide gated potassium and sodium channel 2	protein-coding
4324-3	chr2	60531555	60532254	+	15	NA	intron (NM_022893, intron 2 of 3)	intron (NM_022893, intron 2 of 3)	21594	NM_001363864	53335		NM_018014	ENSG00000119866	BCL11A	CTIP1|DILOS|EVI9|HBFQTL5|SMARCM1|ZNF856	BCL11 transcription factor A	protein-coding
4788-3	chr3	188197219	188197903	+	15	NA	intron (NM_001375462, intron 1 of 11)	intron (NM_001375462, intron 1 of 11)	-15151	NM_001375465	4026		NM_005578	ENSG00000145012	LPP	-	LIM domain containing preferred translocation partner in lipoma	protein-coding
6637-4	chr9	123310728	123311835	+	15	NA	Intergenic	Intergenic	-42695	NM_018387	55342		NM_018387	ENSG00000165209	STRBP	HEL162|ILF3L|SPNR|p74	spermatid perinuclear RNA binding protein	protein-coding
5722	chr3	56865973	56866506	+	15	NA	intron (NM_001289698, intron 2 of 10)	intron (NM_001289698, intron 2 of 10)	50197	NM_001289698	50650		NM_019555	ENSG00000163947	ARHGEF3	GEF3|STA3|XPLN	Rho guanine nucleotide exchange factor 3	protein-coding
6281	chr21	36859908	36860418	+	15	NA	intron (NR_148020, intron 6 of 10)	intron (NR_148020, intron 6 of 10)	102195	NM_001352518	3141		NM_000411	ENSG00000159267	HLCS	HCS	holocarboxylase synthetase	protein-coding
6768	chr6	7247151	7248120	+	15	NA	intron (NM_001003698, intron 11 of 11)	intron (NM_001003698, intron 11 of 11)	65564	NM_001292008	6745		NM_003144	ENSG00000124783	SSR1	TRAPA	signal sequence receptor subunit 1	protein-coding
12348	chr3	170039314	170039498	+	15	NA	intron (NM_014373, intron 2 of 3)	L1MC5|LINE|L1	1411	NM_014373	26996		NM_014373	ENSG00000173890	GPR160	GPCR1|GPCR150	G protein-coupled receptor 160	protein-coding
6817	chr1	223870936	223871553	+	15	NA	Intergenic	L1PA8|LINE|L1	-25272	NM_005426	7159		NM_005426	ENSG00000143514	TP53BP2	53BP2|ASPP2|BBP|P53BP2|PPP1R13A	tumor protein p53 binding protein 2	protein-coding
7281	chr17	31857874	31857916	+	15	NA	intron (NM_018405, intron 1 of 3)	intron (NM_018405, intron 1 of 3)	1067	NM_001330176	55352		NM_018405	ENSG00000172301	COPRS	C17orf79|COPR5|HSA272196|TTP1	coordinator of PRMT5 and differentiation stimulator	protein-coding
7569-2	chrX	100650493	100651441	+	15	NA	intron (NM_014467, intron 3 of 10)	intron (NM_014467, intron 3 of 10)	6768	NM_014467	27286		NM_014467	ENSG00000102359	SRPX2	BPP|CBPS|PMGX|RESDX|SRPUL	sushi repeat containing protein X-linked 2	protein-coding
6139-2	chr6	1050832	1050840	+	15	NA	intron (NR_027116, intron 1 of 3)	MER21B|LTR|ERVL	50496	NR_027115	285768		NR_027115	ENSG00000286785	LINC01622	-	long intergenic non-protein coding RNA 1622	ncRNA
9045	chr6_GL000251v2_alt	3129219	3130734	+	15	NA	promoter-TSS (NM_001199698).2	promoter-TSS (NM_001199698).2	14	NM_001199697	7917		NM_004639	ENSG00000204463	BAG6	BAG-6|BAT3|D6S52E|G3	BAG cochaperone 6	protein-coding
7636	chr19	45764546	45764608	+	15	NA	TTS (NM_001310124)	TTS (NM_001310124)	-3219	NR_147193	109729182		NR_147193	ENSG00000267395	DM1-AS	-	DM1 locus antisense RNA	ncRNA
3162-10	chr9	31542263	31542342	+	15	NA	Intergenic	Intergenic	-160812	NR_135134	101929620		NR_135134	ENSG00000260720	LINC01243	-	long intergenic non-protein coding RNA 1243	ncRNA
15069	chr1	119736150	119736763	+	15	NA	intron (NM_006623, intron 7 of 11)	intron (NM_006623, intron 7 of 11)	24522	NM_006623	26227		NM_006623	ENSG00000092621	PHGDH	3-PGDH|3PGDH|HEL-S-113|NLS|NLS1|PDG|PGAD|PGD|PGDH|PHGDHD|SERA	phosphoglycerate dehydrogenase	protein-coding
6327-5	chr12	53746493	53747172	+	15	NA	Intergenic	Intergenic	5003	NR_104333	102216268		NR_104332	ENSG00000260492	CISTR	CISTR-ACT|CISTRACT|re52431	chondrogenesis-associated transcript	ncRNA
6097	chr1	184792094	184793139	+	15	NA	3' UTR (NM_052966, exon 14 of 14)	3' UTR (NM_052966, exon 14 of 14)	-37758	NM_001319960	80267		NM_025191	ENSG00000116406	EDEM3	C1orf22|CDG2V	ER degradation enhancing alpha-mannosidase like protein 3	protein-coding
5569-2	chrX	72943341	72944269	+	15	NA	promoter-TSS (NR_026594).2	promoter-TSS (NR_026594).2	-55	NR_026595	203429		NM_152693		FAM226A	CXorf50|LINC00246A|NCRNA00246|NCRNA00246A	family with sequence similarity 226 member A	ncRNA
9452-2	chr18	28790196	28791057	+	15	NA	Intergenic	Intergenic	-613496	NM_001792	1000		NM_001792	ENSG00000170558	CDH2	ACOGS|ADHD8|ARVD14|CD325|CDHN|CDw325|NCAD	cadherin 2	protein-coding
8857-2	chr3	31960013	31961469	+	15	NA	intron (NM_001174060, intron 1 of 10)	intron (NM_001174060, intron 1 of 10)	-21009	NM_001137674	344787		NM_001137674	ENSG00000197385	ZNF860	-	zinc finger protein 860	protein-coding
21519-2	chr16	74412825	74413437	+	15	NA	exon (NM_001011880, exon 5 of 13)	exon (NM_001011880, exon 5 of 13)	-5912	NR_135170	105376772		NR_135170		LOC105376772	-	uncharacterized LOC105376772	ncRNA
5704	chr19	47242698	47243264	+	15	NA	Intergenic	(TG)n|Simple_repeat|Simple_repeat	-10314	NM_001127240	27113		NM_014417	ENSG00000105327	BBC3	JFY-1|JFY1|PUMA	BCL2 binding component 3	protein-coding
5118	chr15	53472451	53473073	+	15	NA	Intergenic	L3|LINE|CR1	68090	NR_102336	256764		NM_182758	ENSG00000166415	WDR72	AI2A3	WD repeat domain 72	protein-coding
9680	chr9	137186013	137186916	+	15	NA	intron (NM_013366, intron 2 of 12)	(CA)n|Simple_repeat|Simple_repeat	2096	NM_013366	29882		NM_013366	ENSG00000176248	ANAPC2	APC2	anaphase promoting complex subunit 2	protein-coding
5513	chr7	138249674	138250367	+	15	NA	Intergenic	HERVL-int|LTR|ERVL	126262	NR_039678	100616226		NR_039678	ENSG00000284028	MIR4468	-	microRNA 4468	ncRNA
3438	chr1	245166454	245166927	+	15	NA	intron (NM_018012, intron 2 of 14)	intron (NM_018012, intron 2 of 14)	11705	NM_018012	55083		NM_018012	ENSG00000162849	KIF26B	-	kinesin family member 26B	protein-coding
8396	chr7	37100513	37102074	+	15	NA	intron (NM_014800, intron 14 of 21)	intron (NM_014800, intron 14 of 21)	103497	NR_104120	100861514		NR_104120	ENSG00000224101	ELMO1-AS1	-	ELMO1 antisense RNA 1	ncRNA
4398-3	chr8	65718116	65718627	+	15	NA	3' UTR (NM_002603, exon 13 of 13)	3' UTR (NM_002603, exon 13 of 13)	48498	NM_001145838	9650		NM_014637	ENSG00000066855	MTFR1	CHPPR|FAM54A2	mitochondrial fission regulator 1	protein-coding
5954-3	chr8	112459441	112460423	+	15	NA	intron (NM_198123, intron 32 of 70)	L2c|LINE|L2	-183561	NR_031745	100302225		NR_031745	ENSG00000238399	MIR2053	hsa-mir-2053	microRNA 2053	ncRNA
7649-2	chr8	144521255	144521641	+	15	NA	TTS (NM_001024678)	TTS (NM_001024678)	3456	NM_014665	9684		NM_014665	ENSG00000160959	LRRC14	LRRC14A	leucine rich repeat containing 14	protein-coding
6673	chr11	9497869	9498716	+	15	NA	intron (NM_001282656, intron 10 of 15)	Charlie4z|DNA|hAT-Charlie	37280	NM_003442	7702		NM_003442	ENSG00000166478	ZNF143	SBF|STAF|pHZ-1	zinc finger protein 143	protein-coding
3479-4	chrX	16807495	16807865	+	15	NA	intron (NM_001168683, intron 1 of 7)	intron (NM_001168683, intron 1 of 7)	21214	NM_018360	55787		NM_018360	ENSG00000086712	TXLNG	CXorf15|ELRG|FIAT|LSR5|TXLNGX	taxilin gamma	protein-coding
5016-5	chr8	89759105	89759747	+	15	NA	intron (NM_001375360, intron 1 of 9)	intron (NM_001375360, intron 1 of 9)	1610	NM_003821	8767		NM_003821	ENSG00000104312	RIPK2	CARD3|CARDIAK|CCK|GIG30|RICK|RIP2	receptor interacting serine/threonine kinase 2	protein-coding
14703-3	chr11	117201328	117202034	+	15	NA	intron (NR_045215, intron 1 of 7)	intron (NR_045215, intron 1 of 7)	233	NR_045215	100652768		NR_045215		LOC100652768	-	uncharacterized LOC100652768	ncRNA
17697-2	chr1	22806455	22807470	+	15	NA	intron (NM_017449, intron 3 of 15)	intron (NM_017449, intron 3 of 15)	56264	NR_036214	100422914		NR_036214	ENSG00000264014	MIR4253	-	microRNA 4253	ncRNA
4005-4	chr6	87968474	87968930	+	15	NA	Intergenic	Intergenic	-79139	NM_030960	81833		NM_030960	ENSG00000118434	SPACA1	SAMP32|SPGF85	sperm acrosome associated 1	protein-coding
15785	chr11	67304521	67304529	+	15	NA	intron (NM_017857, intron 2 of 13)	intron (NM_017857, intron 2 of 13)	995	NM_017857	54961		NM_017857	ENSG00000172830	SSH3	SSH3L	slingshot protein phosphatase 3	protein-coding
13826	chr9	129560283	129560517	+	15	NA	Intergenic	L2b|LINE|L2	-48484	NM_001286796	28989		NM_014064	ENSG00000148335	NTMT1	AD-003|C9orf32|HOMT1A|METTL11A|NRMT|NRMT1|NTM1A	N-terminal Xaa-Pro-Lys N-methyltransferase 1	protein-coding
10846	chr4	71603853	71604610	+	15	NA	Intergenic	Intergenic	179848	NM_000583	2638		NM_000583	ENSG00000145321	GC	DBP|DBP-maf|DBP/GC|GRD3|Gc-MAF|GcMAF|HEL-S-51|VDB|VDBG|VDBP	GC vitamin D binding protein	protein-coding
3709-4	chr7	51071813	51071875	+	15	NA	3' UTR (NM_001287438, exon 8 of 8)	3' UTR (NM_001287438, exon 8 of 8)	244965	NM_015198	23242		NM_015198	ENSG00000106078	COBL	-	cordon-bleu WH2 repeat protein	protein-coding
11959	chr6	160991175	160992683	+	15	NA	non-coding (NR_120425, exon 1 of 28)	non-coding (NR_120425, exon 1 of 28)	160	NM_005922	4216		NM_005922	ENSG00000085511	MAP3K4	MAPKKK4|MEKK 4|MEKK4|MTK1|PRO0412	mitogen-activated protein kinase kinase kinase 4	protein-coding
4563	chr10	33040583	33041293	+	15	NA	Intergenic	Intergenic	75869	NR_160030	101929447		NR_160030		IATPR	TCONS_00018476|linc-ITGB1	ITGB1 adjacent tumor promoting lncRNA	ncRNA
7729	chr2	202134644	202135914	+	15	NA	intron (NM_001367720, intron 12 of 23)	intron (NM_001367720, intron 12 of 23)	-18221	NR_135244	729224		NR_135243	ENSG00000222035	KIAA2012-AS1	-	KIAA2012 antisense RNA 1	ncRNA
4736-4	chrUn_GL000195v1	70991	71864	+	15	NA	intron (NM_001347680, intron 1 of 2)	MLT2A1|LTR|ERVL	15308	NR_144628	389831		NM_001242480		LOC389831	-	uncharacterized LOC389831	ncRNA
7231	chr10	109994871	109996009	+	15	NA	promoter-TSS (NM_001320591)	promoter-TSS (NM_001320591)	-933	NM_001320591	120		NM_001121	ENSG00000148700	ADD3	ADDL|CPSQ3	adducin 3	protein-coding
9506	chr7	56374859	56375027	+	15	NA	Intergenic	Intergenic	73432	NR_029420	650226		NR_029420		LOC650226	-	ankyrin repeat domain containing 26 pseudogene	pseudo
6735-2	chr20	58309864	58310346	+	15	NA	promoter-TSS (NR_003505)	promoter-TSS (NR_003505)	390	NM_020673	57403		NM_020673	ENSG00000124209	RAB22A	-	RAB22A, member RAS oncogene family	protein-coding
4825-4	chrX	68842343	68843410	+	15	NA	TTS (NM_004429)	TTS (NM_004429)	13855	NM_004429	1947		NM_004429	ENSG00000090776	EFNB1	CFND|CFNS|EFB1|EFL3|EPLG2|Elk-L|LERK2	ephrin B1	protein-coding
9462	chr5	141520976	141522293	+	15	NA	intron (NM_001314007, intron 27 of 28)	intron (NM_001314007, intron 27 of 28)	32393	NM_032407	56097		NM_018929	ENSG00000240764	PCDHGC5	PCDH-GAMMA-C5	protocadherin gamma subfamily C, 5	protein-coding
5023	chr6	23650502	23651334	+	15	NA	Intergenic	Intergenic	-475297	NM_080723	140767		NM_080723	ENSG00000152954	NRSN1	VMP|p24	neurensin 1	protein-coding
3261-3	chrX	2500145	2500574	+	15	NA	5' UTR (NM_001171135, exon 1 of 2)	5' UTR (NM_001171135, exon 1 of 2)	180	NM_001171135	9189		NM_004729	ENSG00000214717	ZBED1	ALTE|DREF|TRAMP|hDREF	zinc finger BED-type containing 1	protein-coding
9102	chr3	32358896	32359561	+	15	NA	intron (NM_178868, intron 2 of 3)	MER58A|DNA|hAT-Charlie	-32625	NM_138410	112616		NM_138410	ENSG00000153551	CMTM7	CKLFSF7	CKLF like MARVEL transmembrane domain containing 7	protein-coding
10011	chr22	42518945	42520654	+	15	NA	promoter-TSS (NM_015703)	promoter-TSS (NM_015703)	-3	NM_015703	27341		NM_015703	ENSG00000189306	RRP7A	BK126B4.3|CGI-96|MCPH28|Rrp7	ribosomal RNA processing 7 homolog A	protein-coding
13631	chr7	54879602	54882656	+	15	NA	Intergenic	Intergenic	121816	NR_110040	100996654		NR_110040	ENSG00000234707	SEC61G-DT	-	SEC61G divergent transcript	ncRNA
4030-2	chr19	6275001	6275198	+	15	NA	intron (NM_005934, intron 1 of 11)	intron (NM_005934, intron 1 of 11)	4876	NM_005934	4298		NM_005934	ENSG00000130382	MLLT1	ENL|LTG19|YEATS1	MLLT1 super elongation complex subunit	protein-coding
4660-3	chr4	25862066	25862754	+	15	NA	intron (NM_001297592, intron 1 of 23)	CpG	578	NM_015187	23231		NM_015187	ENSG00000091490	SEL1L3	Sel-1L3	SEL1L family member 3	protein-coding
4470-2	chr6	158910555	158911010	+	15	NA	TTS (NR_160977)	TTS (NR_160977)	22305	NR_160979	100130967		NM_001195032	ENSG00000203711	LINC02901	C6orf99	long intergenic non-protein coding RNA 2901	ncRNA
3638-3	chr12	58366929	58367757	+	15	NA	Intergenic	Intergenic	-224359	NR_126341	100506869		NR_126341	ENSG00000258231	LOC100506869	-	uncharacterized LOC100506869	ncRNA
19815	chr1	1361394	1362418	+	15	NA	promoter-TSS (NM_001282583)	promoter-TSS (NM_001282583)	-107	NM_001282583	54587		NM_032348	ENSG00000162576	MXRA8	ASP3	matrix remodeling associated 8	protein-coding
5107-2	chr2	207969116	207969764	+	15	NA	intron (NM_001080475, intron 3 of 7)	intron (NM_001080475, intron 3 of 7)	56087	NM_001080475	389072		NM_001080475	ENSG00000178385	PLEKHM3	DAPR|PLEKHM1L	pleckstrin homology domain containing M3	protein-coding
5603	chr17	31476375	31477237	+	15	NA	intron (NM_032932, intron 3 of 14)	intron (NM_032932, intron 3 of 14)	-11302	NM_001346747	84440		NM_032932	ENSG00000131242	RAB11FIP4	FIP4-Rab11|RAB11-FIP4	RAB11 family interacting protein 4	protein-coding
3727	chr11	23222551	23223062	+	15	NA	Intergenic	AluJb|SINE|Alu	196384	NR_107021	102465860		NR_107021	ENSG00000275868	MIR8054	hsa-mir-8054	microRNA 8054	ncRNA
3927-2	chr3	57436282	57436851	+	14	NA	intron (NM_001366028, intron 30 of 73)	MLT1I-int|LTR|ERVL-MaLR	107778	NM_198564	201625		NM_178504	ENSG00000174844	DNAH12	DHC3|DLP12|DLP3|DNAH12L|DNAH7L|DNAHC12|DNAHC3|DNHD2|HDHC3|HL-19|HL19	dynein axonemal heavy chain 12	protein-coding
5221-2	chr8	11745851	11745855	+	14	NA	intron (NM_002052, intron 2 of 6)	L1MC5|LINE|L1	-15403	NM_001031839	606553		NM_001031839		LINC02905	C8orf49|G4DM	long intergenic non-protein coding RNA 2905	ncRNA
10122	chr3	129312427	129312501	+	14	NA	Intergenic	MLT1K|LTR|ERVL-MaLR	-3807	NR_026991	339942		NM_001025468		H1-10-AS1	C3orf47|H1FX-AS1	H1-10 antisense RNA 1	ncRNA
6766	chr1	166197059	166197950	+	14	NA	Intergenic	Intergenic	-30503	NM_001017961	149297		NM_001017961	ENSG00000188859	FAM78B	-	family with sequence similarity 78 member B	protein-coding
7758	chr5	135834670	135835176	+	14	NA	intron (NR_146141, intron 1 of 8)	CpG	247	NM_145282	153328		NM_145282	ENSG00000145832	SLC25A48	-	solute carrier family 25 member 48	protein-coding
16292	chr16	3147586	3149325	+	14	NA	intron (NR_132322, intron 8 of 9)	intron (NR_132322, intron 8 of 9)	4164	NR_132322	197350		NR_132322	ENSG00000293410	CASP16P	CASP16	caspase 16, pseudogene	pseudo
10470	chr14	34061136	34061374	+	14	NA	Intergenic	Intergenic	-110181	NM_022073	112399		NM_022073	ENSG00000129521	EGLN3	HIFP4H3|HIFPH3|PHD3	egl-9 family hypoxia inducible factor 3	protein-coding
3005-4	chr14	71143312	71143769	+	14	NA	Intergenic	Intergenic	-176936	NM_001354286	26037		NM_015556	ENSG00000197555	SIPA1L1	E6TP1|SPAR1	signal induced proliferation associated 1 like 1	protein-coding
4063	chr4	47471358	47472038	+	14	NA	Intergenic	MER5B|DNA|hAT-Charlie	-7968	NM_001329668	54951		NM_017845	ENSG00000169019	COMMD8	-	COMM domain containing 8	protein-coding
5789	chr14_GL000225v1_random	16617	17502	+	14	NA	NA	BSR/Beta|Satellite|Satellite	NA	NA
5032-2	chr7	157337452	157338599	+	14	NA	intron (NM_001363676, intron 1 of 6)	intron (NM_001363676, intron 1 of 6)	1021	NM_058246	10049		NM_005494	ENSG00000105993	DNAJB6	DJ4|DnaJ|HHDJ1|HSJ-2|HSJ2|LGMD1D|LGMD1E|LGMDD1|MRJ|MSJ-1	DnaJ heat shock protein family (Hsp40) member B6	protein-coding
3117-13	chr5	78595180	78595719	+	14	NA	intron (NM_005779, intron 2 of 4)	intron (NM_005779, intron 2 of 4)	53323	NM_005779	10184		NM_005779	ENSG00000145685	LHFPL2	-	LHFPL tetraspan subfamily member 2	protein-coding
6057	chr17	55794981	55795512	+	14	NA	intron (NM_001330378, intron 5 of 5)	intron (NM_001330378, intron 5 of 5)	44141	NM_001102402	58488		NM_021213	ENSG00000141179	PCTP	PC-TP|STARD2	phosphatidylcholine transfer protein	protein-coding
9058-2	chr8	79864617	79866619	+	14	NA	intron (NR_110954, intron 2 of 5)	intron (NR_110954, intron 2 of 5)	6119	NR_110954	101927040		NR_110954	ENSG00000249328	LOC101927040	-	uncharacterized LOC101927040	ncRNA
5202-3	chr5	11594600	11594733	+	14	NA	intron (NM_001332, intron 2 of 21)	intron (NM_001332, intron 2 of 21)	-5600	NM_001364128	1501		NM_001332	ENSG00000169862	CTNND2	GT24|NPRAP	catenin delta 2	protein-coding
11457	chr5	36443464	36443557	+	14	NA	Intergenic	AluSx1|SINE|Alu	-141608	NM_001323274	202151		NM_145000	ENSG00000164188	RANBP3L	-	RAN binding protein 3 like	protein-coding
3864-2	chr12	2795917	2796458	+	14	NA	intron (NM_002014, intron 1 of 9)	intron (NM_002014, intron 1 of 9)	1217	NM_002014	2288		NM_002014	ENSG00000004478	FKBP4	FKBP51|FKBP52|FKBP59|HBI|Hsp56|PPIase|p52	FKBP prolyl isomerase 4	protein-coding
4161-2	chr16	50024511	50024774	+	14	NA	promoter-TSS (NR_104042)	promoter-TSS (NR_104042)	-564	NR_104042	255919		NM_153261	ENSG00000205423	CNEP1R1	C16orf69|NEP1-R1|NEP1R1|TMEM188|TMP125	CTD nuclear envelope phosphatase 1 regulatory subunit 1	protein-coding
13493	chr1	18940326	18940457	+	14	NA	intron (NM_001136265, intron 1 of 8)	MIR3|SINE|MIR	16285	NM_001136265	126917		NM_001136265	ENSG00000169991	IFFO2	-	intermediate filament family orphan 2	protein-coding
7328-2	chr9	672610	673488	+	14	NA	intron (NM_001256877, intron 2 of 12)	intron (NM_001256877, intron 2 of 12)	-13718	NM_001354336	23189		NM_015158	ENSG00000107104	KANK1	ANKRD15|CPSQ2|KANK	KN motif and ankyrin repeat domains 1	protein-coding
2916-11	chr2	196112601	196112865	+	14	NA	Intergenic	(TG)n|Simple_repeat|Simple_repeat	-43896	NM_018897	56171		NM_018897	ENSG00000118997	DNAH7	CILD50	dynein axonemal heavy chain 7	protein-coding
6596	chr19	580214	581243	+	14	NA	exon (NM_198589, exon 4 of 8)	exon (NM_198589, exon 4 of 8)	8132	NM_001322243	682		NM_001728	ENSG00000172270	BSG	5F7|CD147|EMMPRIN|EMPRIN|HAb18G|OK|TCSF	basigin (Ok blood group)	protein-coding
8482	chr7	139430727	139431764	+	14	NA	Intergenic	L1ME1|LINE|L1	-3719	NR_033999	100129148		NR_033999		LOC100129148	-	uncharacterized LOC100129148	ncRNA
3571	chr1	51955923	51956727	+	14	NA	intron (NM_002867, intron 2 of 4)	MIR|SINE|MIR	34375	NM_002867	5865		NM_002867	ENSG00000169213	RAB3B	-	RAB3B, member RAS oncogene family	protein-coding
3622-3	chr6	142290759	142291105	+	14	NA	Intergenic	MIRb|SINE|MIR	-10987	NM_020455	57211		NM_020455	ENSG00000112414	ADGRG6	APG1|DREG|GPR126|LCCS9|PR126|PS1TP2|VIGR	adhesion G protein-coupled receptor G6	protein-coding
10017	chr14	104793430	104793519	+	14	NA	5' UTR (NM_005163, exon 1 of 14)	5' UTR (NM_005163, exon 1 of 14)	127	NM_005163	207		NM_005163	ENSG00000142208	AKT1	AKT|PKB|PKB-ALPHA|PRKBA|RAC|RAC-ALPHA	AKT serine/threonine kinase 1	protein-coding
6535-3	chr14	60003807	60004456	+	14	NA	intron (NR_075071, intron 21 of 32)	intron (NR_075071, intron 21 of 32)	84418	NR_075071	341883		NM_198499	ENSG00000131951	LRRC9	-	leucine rich repeat containing 9	protein-coding
3510-2	chr15	41048336	41049197	+	14	NA	intron (NR_104038, intron 21 of 34)	MER5B|DNA|hAT-Charlie	67480	NR_104038	54617		NM_017553	ENSG00000128908	INO80	INO80A|INOC1	INO80 complex ATPase subunit	protein-coding
3986	chr12	15688392	15689046	+	14	NA	intron (NM_004447, intron 1 of 20)	LTR1A2|LTR|ERV1	100669	NM_004447	2059		NM_004447	ENSG00000151491	EPS8	DFNB102	EGFR pathway substrate 8, signaling adaptor	protein-coding
6739-2	chr11	69131253	69132102	+	14	NA	Intergenic	Intergenic	-24258	NR_161183	107984345		NM_001369201	ENSG00000284713	SMIM38	-	small integral membrane protein 38	protein-coding
4303-4	chr2	26925139	26925725	+	14	NA	intron (NM_020134, intron 3 of 12)	intron (NM_020134, intron 3 of 12)	-45205	NM_012326	22924		NM_012326	ENSG00000084764	MAPRE3	EB3|EBF3|EBF3-S|RP3	microtubule associated protein RP/EB family member 3	protein-coding
7317	chr11	129459917	129459969	+	14	NA	Intergenic	MIR|SINE|MIR	84095	NM_003658	8538		NM_003658	ENSG00000043039	BARX2	-	BARX homeobox 2	protein-coding
16141	chr16	57532875	57533170	+	14	NA	intron (NM_033212, intron 1 of 8)	intron (NM_033212, intron 1 of 8)	3549	NM_033212	92922		NM_033212	ENSG00000135736	CCDC102A	-	coiled-coil domain containing 102A	protein-coding
3737-5	chr5	107387774	107388498	+	14	NA	intron (NM_001962, intron 2 of 4)	intron (NM_001962, intron 2 of 4)	282801	NM_001962	1946		NM_001962	ENSG00000184349	EFNA5	AF1|EFL5|EPLG7|GLC1M|LERK7|RAGS	ephrin A5	protein-coding
5512	chr20	23694260	23695545	+	14	NA	Intergenic	LTR5_Hs|LTR|ERVK	-5864	NM_001899	1472		NM_001899	ENSG00000101441	CST4	-	cystatin S	protein-coding
6665	chr7	91880206	91881059	+	14	NA	promoter-TSS (NM_006980)	promoter-TSS (NM_006980)	70	NM_001301135	7978		NM_006980	ENSG00000127989	MTERF1	MTERF	mitochondrial transcription termination factor 1	protein-coding
5460	chr17	38286506	38287207	+	14	NA	Intergenic	Intergenic	-10167	NM_001278279	84311		NM_032351	ENSG00000278845	MRPL45	L45mt|MRP-L45|Mba1|mL45	mitochondrial ribosomal protein L45	protein-coding
7648	chr6	16803273	16804477	+	14	NA	Intergenic	Intergenic	-42385	NM_000332	6310		NM_000332	ENSG00000124788	ATXN1	ATX1|D6S504E|SCA1	ataxin 1	protein-coding
6636-2	chr6	150668156	150669382	+	14	NA	intron (NM_001329805, intron 2 of 16)	intron (NM_001329805, intron 2 of 16)	-14878	NM_001329798	57480		NM_001029884	ENSG00000120278	PLEKHG1	ARHGEF41	pleckstrin homology and RhoGEF domain containing G1	protein-coding
4597-2	chr12	42349259	42350050	+	14	NA	intron (NM_001364832, intron 3 of 8)	SVA_B|Retroposon|SVA	17856	NM_001364834	51535		NM_016488	ENSG00000134283	PPHLN1	CR|HSPC206|HSPC232	periphilin 1	protein-coding
6218-2	chr4	142952590	142953530	+	14	NA	Intergenic	Intergenic	-106525	NM_003866	8821		NM_003866	ENSG00000109452	INPP4B	-	inositol polyphosphate-4-phosphatase type II B	protein-coding
10332	chr3	126083225	126084328	+	14	NA	intron (NM_017836, intron 1 of 10)	CpG	348	NM_001008486	54946		NM_017836	ENSG00000114544	SLC41A3	SLC41A1-L2	solute carrier family 41 member 3	protein-coding
8215-2	chr9	128093967	128095154	+	14	NA	intron (NM_001265614, intron 1 of 10)	intron (NM_001265614, intron 1 of 10)	3096	NM_001006642	114789		NM_052901	ENSG00000148339	SLC25A25	MCSC|PCSCL|SCAMC-2|SCAMC2	solute carrier family 25 member 25	protein-coding
13210	chr2	237692300	237693338	+	14	NA	intron (NM_001137551, intron 1 of 11)	intron (NM_001137551, intron 1 of 11)	614	NM_004735	9208		NM_004735	ENSG00000124831	LRRFIP1	FLAP-1|FLAP1|FLIIAP1|GCF-2|GCF2|HUFI-1|TRIP	LRR binding FLII interacting protein 1	protein-coding
3977	chr1	212700972	212701805	+	14	NA	Intergenic	Intergenic	-1548	NM_018664	55509		NM_018664	ENSG00000123685	BATF3	JDP1|JUNDM1|SNFT	basic leucine zipper ATF-like transcription factor 3	protein-coding
4868	chr11	64321246	64321925	+	14	NA	intron (NM_181651, intron 4 of 4)	intron (NM_181651, intron 4 of 4)	-2989	NM_001372071	51504		NM_016404	ENSG00000173113	TRMT112	HSPC152|HSPC170|TRM112|TRMT11-2|hTrm112	tRNA methyltransferase activator subunit 11-2	protein-coding
8508	chr22	50310752	50311445	+	14	NA	3' UTR (NM_001001794, exon 20 of 20)	3' UTR (NM_001001794, exon 20 of 20)	-3452	NM_012401	23654		NM_012401	ENSG00000196576	PLXNB2	MM1|Nbla00445|PLEXB2|dJ402G11.3|lncFAL	plexin B2	protein-coding
5042	chr6	62997639	62998540	+	14	NA	Intergenic	PABL_A|LTR|ERV1	321888	NM_001143940	51557		NM_016571	ENSG00000146166	LGSN	GLULD1|LGS	lengsin, lens protein with glutamine synthetase domain	protein-coding
3743-3	chr21	45477794	45477870	+	14	NA	promoter-TSS (NR_106873)	promoter-TSS (NR_106873)	-434	NR_106873	102465489		NR_106873	ENSG00000275167	MIR6815	hsa-mir-6815	microRNA 6815	ncRNA
10473	chr16	2035969	2036477	+	14	NA	intron (NM_001252076, intron 1 of 5)	intron (NM_001252076, intron 1 of 5)	2929	NM_001252075	9351		NM_004785	ENSG00000065054	NHERF2	E3KARP|NHE3RF2|NHERF-2|OCTS2|SIP-1|SIP1|SLC9A3R2|TKA-1	NHERF family PDZ scaffold protein 2	protein-coding
5816	chr15	38050282	38051328	+	14	NA	intron (NR_120330, intron 2 of 3)	intron (NR_120330, intron 2 of 3)	10412	NR_120330	101928227		NR_120330	ENSG00000259225	LINC02345	-	long intergenic non-protein coding RNA 2345	ncRNA
9350-2	chr6	170092514	170093041	+	14	NA	Intergenic	Intergenic	-67865	NR_125878	102724511		NR_125878	ENSG00000232197	LOC102724511	-	uncharacterized LOC102724511	ncRNA
5325-3	chr9	89922331	89923273	+	14	NA	Intergenic	(AC)n|Simple_repeat|Simple_repeat	-46614	NR_109791	101927847		NR_109791		LOC101927847	-	uncharacterized LOC101927847	ncRNA
9759	chr14	71139832	71140823	+	14	NA	Intergenic	MER20|DNA|hAT-Charlie	-180149	NM_001354286	26037		NM_015556	ENSG00000197555	SIPA1L1	E6TP1|SPAR1	signal induced proliferation associated 1 like 1	protein-coding
6456-2	chr1	146448384	146449354	+	14	NA	Intergenic	Intergenic	-37463	NR_103556	100288805		NR_049745		HYDIN2	HYDINP1	HYDIN axonemal central pair apparatus protein 2 (pseudogene)	pseudo
16972	chr8	144462871	144464124	+	14	NA	promoter-TSS (NR_162109)	promoter-TSS (NR_162109)	-626	NM_001330618	50626		NM_001330618	ENSG00000187954	ZFTRAF1	CHRP|CYHR1	zinc finger TRAF-type containing 1	protein-coding
3018-3	chr7	36282097	36282646	+	14	NA	intron (NM_030636, intron 4 of 7)	L2a|LINE|L2	84869	NM_015314	23366		NM_015314	ENSG00000164542	MATCAP2	KIAA0895|TMCP2	microtubule associated tyrosine carboxypeptidase 2	protein-coding
5141-2	chr16	89192256	89193040	+	14	NA	intron (NM_004933, intron 11 of 13)	CpG-10236	7889	NM_001384775	146429		NM_001242757	ENSG00000259803	SLC22A31	-	solute carrier family 22 member 31	protein-coding
7118	chr4	123419704	123421042	+	14	NA	Intergenic	Intergenic	20833	NM_005841	10252		NM_005841	ENSG00000164056	SPRY1	hSPRY1	sprouty RTK signaling antagonist 1	protein-coding
3812-3	chr3	169148501	169149047	+	14	NA	intron (NM_001205194, intron 1 of 15)	intron (NM_001205194, intron 1 of 15)	-1303	NM_001164000	2122		NM_004991	ENSG00000085276	MECOM	AML1-EVI-1|EVI1|KMT8E|MDS1|MDS1-EVI1|PRDM3|RUSAT2	MDS1 and EVI1 complex locus	protein-coding
2313-9	chr4	31088836	31089202	+	14	NA	intron (NM_001173523, intron 2 of 2)	intron (NM_001173523, intron 2 of 2)	-82125	NR_125935	102723778		NR_125935		LINC02497	-	long intergenic non-protein coding RNA 2497	ncRNA
4394	chr10	97622948	97623834	+	14	NA	intron (NM_001098831, intron 1 of 4)	AluJr|SINE|Alu	10109	NM_178832	118812		NM_178832	ENSG00000171160	MORN4	C10orf83|UTA|bA548K23.4|rtp	MORN repeat containing 4	protein-coding
4938-4	chr5	132875985	132877306	+	14	NA	3' UTR (NM_014423, exon 21 of 21)	3' UTR (NM_014423, exon 21 of 21)	2977	NM_052971	116842		NM_052971	ENSG00000164406	LEAP2	LEAP-2	liver enriched antimicrobial peptide 2	protein-coding
13851-2	chr7	2527546	2527910	+	14	NA	TTS (NR_039791)	TTS (NR_039791)	654	NR_039791	100616116		NR_039791	ENSG00000264357	MIR4648	-	microRNA 4648	ncRNA
3802-8	chr6	130863528	130863943	+	14	NA	intron (NR_146620, intron 10 of 12)	intron (NR_146620, intron 10 of 12)	36329	NM_001195597	100507203		NM_001195597	ENSG00000256162	SMLR1	-	small leucine rich protein 1	protein-coding
4673-2	chr14	49976243	49976892	+	14	NA	Intergenic	L2c|LINE|L2	10168	NR_106724	102464828		NR_106724	ENSG00000278038	MIR6076	hsa-mir-6076	microRNA 6076	ncRNA
14059	chr22	24174538	24174931	+	14	NA	intron (NM_012295, intron 34 of 36)	MLT1F1|LTR|ERVL-MaLR	-6753	NM_019601	56241		NM_019601	ENSG00000099994	SUSD2	BK65A6.2|W5C5	sushi domain containing 2	protein-coding
5823	chr12	131626615	131627733	+	14	NA	Intergenic	Intergenic	20947	NR_146868	105370085		NR_146868		LINC02414	-	long intergenic non-protein coding RNA 2414	ncRNA
6917	chr11	96253938	96254437	+	14	NA	intron (NM_032427, intron 1 of 4)	intron (NM_032427, intron 1 of 4)	-87251	NR_036125	100422991		NR_036125	ENSG00000266192	MIR1260B	mir-1260b	microRNA 1260b	ncRNA
13421	chr1	155009934	155010342	+	14	NA	intron (NM_001377455, intron 2 of 3)	OldhAT1|DNA|hAT-Ac	7336	NM_001252406	51043		NM_001252406	ENSG00000160685	ZBTB7B	CKROX|THPOK|ZBTB15|ZFP-67|ZFP67|ZNF857B|c-KROX|hcKROX|vGAF	zinc finger and BTB domain containing 7B	protein-coding
8527-2	chr2	38796883	38798431	+	14	NA	TTS (NM_001329963)	TTS (NM_001329963)	19447	NM_024775	79833		NM_024775	ENSG00000152147	GEMIN6	-	gem nuclear organelle associated protein 6	protein-coding
6269-3	chr16	59210687	59211594	+	14	NA	Intergenic	OldhAT1|DNA|hAT-Ac	-476824	NM_001286220	2806		NM_002080	ENSG00000125166	GOT2	DEE82|KAT4|KATIV|KYAT4|mitAAT	glutamic-oxaloacetic transaminase 2	protein-coding
8392	chr8	106607994	106609364	+	14	NA	intron (NM_001198532, intron 2 of 15)	intron (NM_001198532, intron 2 of 15)	-49129	NM_181354	55074		NM_018002	ENSG00000164830	OXR1	CHEGDD|Nbla00307|TLDC3	oxidation resistance 1	protein-coding
12253	chr9	94797944	94799610	+	14	NA	intron (NM_001193329, intron 3 of 15)	intron (NM_001193329, intron 3 of 15)	-11185	NR_031755	100313780		NR_031755	ENSG00000252153	MIR2278	mir-2278	microRNA 2278	ncRNA
3921	chr1	1472382	1472981	+	14	NA	intron (NM_031921, intron 1 of 15)	intron (NM_031921, intron 1 of 15)	916	NM_031921	83858		NM_031921	ENSG00000160072	ATAD3B	AAA-TOB3|TOB3	ATPase family AAA domain containing 3B	protein-coding
12661	chr21	41705941	41706168	+	14	NA	Intergenic	Intergenic	9721	NR_027272	150135		NM_152506	ENSG00000236384	LINC00479	C21orf129|PRED76	long intergenic non-protein coding RNA 479	ncRNA
9492	chr17	8015679	8015877	+	14	NA	exon (NM_000180, exon 16 of 20)	exon (NM_000180, exon 16 of 20)	13163	NM_000180	3000		NM_000180	ENSG00000132518	GUCY2D	CACD|CACD1|CG-E|CORD5|CORD6|CSNB1I|CYGD|GUC1A4|GUC2D|LCA|LCA1|RCD2|RETGC-1|ROS-GC1|ROSGC|retGC	guanylate cyclase 2D, retinal	protein-coding
7025-2	chr3	99843403	99844367	+	14	NA	intron (NM_182909, intron 5 of 5)	MER1B|DNA|hAT-Charlie	-20020	NR_110821	101929357		NR_110821		HP09053	-	uncharacterized LOC101929357	ncRNA
6661-2	chr2	15985569	15986004	+	14	NA	Intergenic	(TG)n|Simple_repeat|Simple_repeat	-43353	NR_161163	10408		NR_110230	ENSG00000233718	MYCNOS	MYCN-AS1|N-CYM|NCYM|NYCM	MYCN opposite strand	ncRNA
3337-2	chr1	151936332	151937039	+	14	NA	Intergenic	LTR15|LTR|ERV1	-27174	NM_053055	117145		NM_053055	ENSG00000159445	THEM4	CTMP	thioesterase superfamily member 4	protein-coding
14181	chr1	31787402	31787410	+	14	NA	Intergenic	Intergenic	-23066	NM_001294335	576		NM_001294335	ENSG00000121753	ADGRB2	BAI2	adhesion G protein-coupled receptor B2	protein-coding
7717	chr22	42935011	42935441	+	14	NA	intron (NM_001184970, intron 1 of 10)	intron (NM_001184970, intron 1 of 10)	11815	NM_007229	11252		NM_007229	ENSG00000100266	PACSIN2	SDPII	protein kinase C and casein kinase substrate in neurons 2	protein-coding
8699	chr1	6553897	6554573	+	14	NA	exon (NM_024654, exon 1 of 12)	exon (NM_024654, exon 1 of 12)	278	NM_024654	79707		NM_024654	ENSG00000162408	NOL9	Grc3|NET6	nucleolar protein 9	protein-coding
9879	chr18	64264238	64264861	+	14	NA	intron (NR_033881, intron 3 of 9)	L1MEd|LINE|L1	-4494	NR_033983	400654		NR_033983	ENSG00000266952	LINC01538	-	long intergenic non-protein coding RNA 1538	ncRNA
9471-3	chr6	11236183	11237483	+	14	NA	intron (NM_001142393, intron 2 of 7)	intron (NM_001142393, intron 2 of 7)	-4151	NM_001271033	4739		NM_006403	ENSG00000111859	NEDD9	CAS-L|CAS2|CASL|CASS2|HEF1	neural precursor cell expressed, developmentally down-regulated 9	protein-coding
13377	chr9	33926517	33926665	+	14	NA	intron (NR_163243, intron 18 of 24)	intron (NR_163243, intron 18 of 24)	7773	NM_001282530	55833		NM_018449	ENSG00000137073	UBAP2	UBAP-2	ubiquitin associated protein 2	protein-coding
13210-2	chr2	237693671	237694374	+	14	NA	intron (NM_001137551, intron 1 of 11)	MER46C|DNA|TcMar-Tigger	1817	NM_004735	9208		NM_004735	ENSG00000124831	LRRFIP1	FLAP-1|FLAP1|FLIIAP1|GCF-2|GCF2|HUFI-1|TRIP	LRR binding FLII interacting protein 1	protein-coding
24888	chr7	74293382	74294217	+	14	NA	intron (NM_032421, intron 1 of 15)	intron (NM_032421, intron 1 of 15)	4392	NM_032421	7461		NM_003388	ENSG00000106665	CLIP2	CLIP|CLIP-115|CYLN2|WBSCR3|WBSCR4|WSCR3|WSCR4	CAP-Gly domain containing linker protein 2	protein-coding
5613-2	chr6	153816426	153817640	+	14	NA	Intergenic	Intergenic	-193463	NM_001145281	4988		NM_000914	ENSG00000112038	OPRM1	LMOR|M-OR-1|MOP|MOR|MOR1|OPRM	opioid receptor mu 1	protein-coding
8099	chr4	164876649	164877810	+	14	NA	promoter-TSS (NM_001297550)	promoter-TSS (NM_001297550)	51	NM_001297550	100506013		NM_001297550	ENSG00000248329	APELA	ELA|Ende|tdl	apelin receptor early endogenous ligand	protein-coding
7197-2	chr4	78628733	78630198	+	14	NA	Intergenic	LTR9|LTR|ERV1	-16529	NR_038304	100505702		NR_038303		LINC01094	CTEPHA1	long intergenic non-protein coding RNA 1094	ncRNA
4761-3	chr7	80277379	80278449	+	14	NA	Intergenic	Intergenic	96525	NR_110075	101927269		NR_110075		LOC101927269	-	uncharacterized LOC101927269	ncRNA
9020-2	chr18	58068673	58070189	+	14	NA	intron (NM_001144964, intron 1 of 30)	intron (NM_001144964, intron 1 of 30)	22205	NM_001144964	23327		NM_015277	ENSG00000049759	NEDD4L	NEDD4-2|NEDD4.2|PVNH7|RSP5|hNEDD4-2	NEDD4 like E3 ubiquitin protein ligase	protein-coding
3743-4	chr21	45478023	45478310	+	14	NA	promoter-TSS (NR_106873)	promoter-TSS (NR_106873)	-100	NR_106873	102465489		NR_106873	ENSG00000275167	MIR6815	hsa-mir-6815	microRNA 6815	ncRNA
4833-2	chr17	33038596	33039510	+	14	NA	intron (NM_183377, intron 3 of 9)	intron (NM_183377, intron 3 of 9)	46202	NM_001317225	124912		NM_173847	ENSG00000141316	SPACA3	ALLP17|CT54|LYC3|LYZC|LYZL3|SLLP1	sperm acrosome associated 3	protein-coding
9468	chr3	100023088	100023432	+	14	NA	intron (NM_182909, intron 1 of 5)	intron (NM_182909, intron 1 of 5)	-58862	NR_037486	100500859		NR_037486	ENSG00000264897	MIR3921	-	microRNA 3921	ncRNA
6149-2	chrX	154020017	154020562	+	14	NA	promoter-TSS (NM_001025243)	promoter-TSS (NM_001025243)	-300	NR_031757	100313781		NR_031757	ENSG00000284286	MIR718	hsa-mir-718	microRNA 718	ncRNA
10170	chr1	143189807	143191319	+	14	NA	Intergenic	Intergenic	232029	NR_027354	645166		NR_027354	ENSG00000288905	LSP1P5	-	LSP1 pseudogene 5	pseudo
3660-6	chr3	105847173	105847773	+	14	NA	intron (NR_135807, intron 3 of 20)	intron (NR_135807, intron 3 of 20)	20118	NM_001321813	868		NM_004351	ENSG00000114423	CBLB	ADMIO3|Cbl-b|Nbla00127|RNF56	Cbl proto-oncogene B	protein-coding
5977-2	chr6	41499213	41500155	+	14	NA	Intergenic	Intergenic	-2760	NR_120347	103106903		NR_120347	ENSG00000226917	LINC01276	-	long intergenic non-protein coding RNA 1276	ncRNA
6935-3	chr8	101614700	101615634	+	14	NA	intron (NM_024915, intron 8 of 15)	intron (NM_024915, intron 8 of 15)	122728	NM_024915	79977		NM_024915	ENSG00000083307	GRHL2	BOM|DFNA28|ECTDS|PPCD4|TFCP2L3	grainyhead like transcription factor 2	protein-coding
5794-3	chr16	14299058	14299736	+	14	NA	Intergenic	L2c|LINE|L2	-2891	NR_132983	100129781		NR_132983	ENSG00000262454	MIR193BHG	HypERlnc|lincNORS	MIR193b-365a host gene	ncRNA
4655	chr4	188665633	188666354	+	14	NA	Intergenic	Intergenic	-110664	NR_149102	105377610		NR_149102	ENSG00000251619	LINC02508	-	long intergenic non-protein coding RNA 2508	ncRNA
6336	chr11	1151371	1152188	+	14	NA	Intergenic	Intergenic	-6174	NM_001304359	4586		NM_017511	ENSG00000215182	MUC5AC	MUC5|TBM|leB|mucin	mucin 5AC, oligomeric mucus/gel-forming	protein-coding
5061	chr15	56042670	56043067	+	14	NA	Intergenic	LTR32|LTR|ERVL	-49256	NM_006154	4734		NM_006154	ENSG00000069869	NEDD4	NEDD4-1|RPF1	NEDD4 E3 ubiquitin protein ligase	protein-coding
9051	chr17	28760125	28760622	+	14	NA	intron (NM_018182, intron 3 of 3)	AluSx1|SINE|Alu	16362	NM_004295	9618		NM_004295	ENSG00000076604	TRAF4	CART1|MLN62|RNF83	TNF receptor associated factor 4	protein-coding
5120-2	chr6	41503874	41504681	+	14	NA	intron (NR_120347, intron 2 of 2)	CpG	1833	NR_120347	103106903		NR_120347	ENSG00000226917	LINC01276	-	long intergenic non-protein coding RNA 1276	ncRNA
5403	chr6	53854814	53855666	+	14	NA	intron (NM_018214, intron 2 of 13)	intron (NM_018214, intron 2 of 13)	60235	NM_018214	55227		NM_018214	ENSG00000137269	LRRC1	LANO|dJ523E19.1	leucine rich repeat containing 1	protein-coding
7497	chr11	64206262	64206717	+	14	NA	promoter-TSS (NM_001382361)	promoter-TSS (NM_001382361)	-232	NM_001382362	83706		NM_031471	ENSG00000149781	FERMT3	KIND3|MIG-2|MIG2B|UNC112C|URP2|URP2SF	FERM domain containing kindlin 3	protein-coding
6572	chr7	32427599	32428352	+	14	NA	exon (NM_001322059, exon 1 of 18)	exon (NM_001322059, exon 1 of 18)	249	NM_001322059	5137		NM_005020	ENSG00000154678	PDE1C	DFNA74|Hcam3|cam-PDE 1C|hCam-3	phosphodiesterase 1C	protein-coding
3644	chr1	59892798	59893310	+	14	NA	TTS (NM_000775)	TTS (NM_000775)	33719	NM_000775	1573		NM_000775	ENSG00000134716	CYP2J2	CPJ2|CYPIIJ2	cytochrome P450 family 2 subfamily J member 2	protein-coding
6739	chr10	103241075	103241862	+	14	NA	Intergenic	Intergenic	-4419	NM_001143909	729020		NM_001143909	ENSG00000235376	RPEL1	-	ribulose-5-phosphate-3-epimerase like 1	protein-coding
7570	chr9	111599177	111599985	+	14	NA	promoter-TSS (NM_012212)	promoter-TSS (NM_012212)	66	NM_001146108	22949		NM_012212	ENSG00000106853	PTGR1	DIG-1|LTB4DH|PGR1|ZADH3	prostaglandin reductase 1	protein-coding
5675	chr1	117371351	117371751	+	14	NA	intron (NM_006699, intron 1 of 12)	L2c|LINE|L2	4102	NM_006699	10905		NM_006699	ENSG00000198162	MAN1A2	MAN1B	mannosidase alpha class 1A member 2	protein-coding
3470	chr17	72716257	72716950	+	14	NA	intron (NM_001352691, intron 8 of 10)	intron (NM_001352691, intron 8 of 10)	-76131	NR_033876	400619		NR_033876	ENSG00000227036	LINC00511	LCAL5|onco-lncRNA-12	long intergenic non-protein coding RNA 511	ncRNA
4534-2	chr2	201758120	201758803	+	14	NA	TTS (NM_001135745)	TTS (NM_001135745)	22472	NM_001135745	57679		NM_020919	ENSG00000003393	ALS2	ALS2CR6|ALSJ|IAHSP|PLSJ	alsin Rho guanine nucleotide exchange factor ALS2	protein-coding
6375	chr2	86079901	86080811	+	14	NA	intron (NM_015425, intron 9 of 33)	intron (NM_015425, intron 9 of 33)	25530	NM_015425	25885		NM_015425	ENSG00000068654	POLR1A	A190|AFDCIN|HLD27|RPA1|RPA190|RPA194|RPO1-4|RPO14	RNA polymerase I subunit A	protein-coding
13001	chr16	67430019	67430032	+	14	NA	Intergenic	Intergenic	-1096	NM_000196	3291		NM_000196	ENSG00000176387	HSD11B2	AME|AME1|HSD11K|HSD2|SDR9C3	hydroxysteroid 11-beta dehydrogenase 2	protein-coding
4292	chr2	18831123	18831853	+	14	NA	Intergenic	(AC)n|Simple_repeat|Simple_repeat	195483	NR_135287	400945		NR_135287	ENSG00000236204	LINC01376	-	long intergenic non-protein coding RNA 1376	ncRNA
5900	chr1	236604230	236604921	+	14	NA	promoter-TSS (NM_018072)	promoter-TSS (NM_018072)	-59	NM_018072	55127		NM_018072	ENSG00000119285	HEATR1	BAP28|UTP10	HEAT repeat containing 1	protein-coding
5079	chr1	8018615	8019614	+	14	NA	intron (NM_018948, intron 1 of 3)	intron (NM_018948, intron 1 of 3)	7195	NM_018948	54206		NM_018948	ENSG00000116285	ERRFI1	GENE-33|MIG-6|MIG6|RALT	ERBB receptor feedback inhibitor 1	protein-coding
5468	chr4	82044332	82044969	+	14	NA	Intergenic	CpG	329341	NM_031370	3184		NM_002138	ENSG00000138668	HNRNPD	AUF1|AUF1A|HNRPD|P37|hnRNPD0	heterogeneous nuclear ribonucleoprotein D	protein-coding
3524-2	chr1	99559072	99559604	+	14	NA	intron (NR_031666, intron 1 of 4)	intron (NR_031666, intron 1 of 4)	-71534	NR_125951	101928270		NR_125951	ENSG00000224445	LINC01708	-	long intergenic non-protein coding RNA 1708	ncRNA
6930	chr1	234862749	234863378	+	14	NA	Intergenic	Intergenic	100936	NR_125945	101927851		NR_125945	ENSG00000238005	LNCATV	-	lncRNA negative regulator of antiviral signaling	ncRNA
7273	chr2	24826787	24828052	+	14	NA	intron (NM_001320613, intron 15 of 21)	intron (NM_001320613, intron 15 of 21)	33994	NM_001322101	79172		NM_024322	ENSG00000138092	CENPO	CENP-O|ICEN-36|MCM21R	centromere protein O	protein-coding
3855-7	chr9	5886252	5886722	+	14	NA	Intergenic	MIR|SINE|MIR	-4402	NM_005511	2315		NM_005511	ENSG00000120215	MLANA	MART-1|MART1	melan-A	protein-coding
3891-5	chr6	56370165	56370680	+	14	NA	intron (NM_001318752, intron 1 of 28)	intron (NM_001318752, intron 1 of 28)	23706	NM_001318752	81578		NM_030820	ENSG00000124749	COL21A1	COLA1L|FP633	collagen type XXI alpha 1 chain	protein-coding
3532-6	chr9	133128389	133128811	+	14	NA	intron (NM_001042368, intron 1 of 17)	intron (NM_001042368, intron 1 of 17)	801	NM_001271775	5900		NM_006266	ENSG00000160271	RALGDS	RGDS|RGF|RalGEF	ral guanine nucleotide dissociation stimulator	protein-coding
4633-3	chr14_KI270847v1_alt	230539	231192	+	14	NA	promoter-TSS (NM_001142593)	promoter-TSS (NM_001142593)	-378	NM_014216	3705		NM_014216	ENSG00000100605	ITPK1	ITRPK1	inositol-tetrakisphosphate 1-kinase	protein-coding
12260	chr1	205275892	205275900	+	14	NA	Intergenic	Intergenic	18699	NM_001331034	9911		NM_014858	ENSG00000133069	TMCC2	HUCEP11	transmembrane and coiled-coil domain family 2	protein-coding
13728	chr22	19172737	19172745	+	14	NA	TTS (NR_103767)	TTS (NR_103767)	1035	NR_103767	100652736		NR_103767		LINC01311	-	long intergenic non-protein coding RNA 1311	ncRNA
5892	chr11	63945229	63946020	+	14	NA	intron (NM_001300800, intron 1 of 7)	intron (NM_001300800, intron 1 of 7)	6293	NM_001300800	79829		NM_024771	ENSG00000110583	NAA40	NAT11|NatD|PATT1|hNatD	N-alpha-acetyltransferase 40, NatD catalytic subunit	protein-coding
6445-2	chr15	96264397	96265224	+	14	NA	intron (NR_125738, intron 2 of 4)	intron (NR_125738, intron 2 of 4)	-61236	NM_001145155	7026		NM_021005	ENSG00000185551	NR2F2	ARP-1|ARP1|CHTD4|COUPTF2|COUPTFB|COUPTFII|NF-E3|SRXX5|SVP40|TFCOUP2	nuclear receptor subfamily 2 group F member 2	protein-coding
2943-6	chr4	52659023	52659329	+	14	NA	promoter-TSS (NR_125363)	promoter-TSS (NR_125363)	125	NM_022832	64854		NM_022832	ENSG00000109189	USP46	-	ubiquitin specific peptidase 46	protein-coding
5286-3	chr4	169665904	169666100	+	14	NA	intron (NM_001243374, intron 1 of 11)	intron (NM_001243374, intron 1 of 11)	5940	NM_001243374	1182		NM_001829	ENSG00000109572	CLCN3	CLC3|ClC-3|NEDHYBA|NEDSBA	chloride voltage-gated channel 3	protein-coding
17973	chr22	44736857	44737006	+	14	NA	exon (NM_001017529, exon 8 of 8)	exon (NM_001017529, exon 8 of 8)	-15627	NM_001198726	23779		NM_181335	ENSG00000241484	ARHGAP8	BPGAP1|PP610	Rho GTPase activating protein 8	protein-coding
[truncated: 26,121 more rows]
