# Supplementary material for: Epigenetic control of PDX1 and NGN3 by a computationally designed PRC2 inhibitor enforces pancreatic endocrine differentiation from pluripotent stem cells
Source: Research Square preprint supplement (doi:10.21203/rs.3.rs-9115136/v1), 2026-03-26
Supplement: Supplementary file 3 [file 77e64764d9bc6c9d1c22930c.xlsx]

## Sheet: Sheet1
Table S3- List of nearest neibhoring genes to the top 1% significant H3K27ac peaks unique to EBdCas9 control samples
PeakID (cmd=annotatePeaks.pl /anvil/scratch/x-sbattle/pancreatic/peaks/union_unique_peaks/Dunion_unique.top0.01.peaks.bed hg38 -go)	Chr	Start	End	Strand	Peak Score	Focus Ratio/Region Size	Annotation	Detailed Annotation	Distance to TSS	Nearest PromoterID	Entrez ID	Nearest Unigene	Nearest Refseq	Nearest Ensembl	Gene Name	Gene Alias	Gene Description	Gene Type
55219	chr3	96617241	96618138	+	519	NA	Intergenic	Intergenic	-196905	NM_001080448	285220		NM_173655	ENSG00000080224	EPHA6	EHK-2|EHK2|EK12|EPA6|HEK12|PRO57066	EPH receptor A6	protein-coding
26354	chr7	145997343	145997427	+	445	NA	Intergenic	Intergenic	-776886	NM_014141	26047		NM_014141	ENSG00000174469	CNTNAP2	AUTS15|CASPR2|CDFE|NRXN4|PTHSL1	contactin associated protein 2	protein-coding
22476	chrY	4344781	4344851	+	396	NA	Intergenic	Intergenic	-261304	NR_162096	113218498		NR_162096		MIR9985	-	microRNA 9985	ncRNA
16676	chr12	41363645	41363723	+	308	NA	intron (NM_001164595, intron 3 of 9)	intron (NM_001164595, intron 3 of 9)	-74055	NM_013377	29951		NM_013377	ENSG00000165966	PDZRN4	LNX4|SAMCAP3L	PDZ domain containing ring finger 4	protein-coding
37640	chr5	134924138	134924737	+	295	NA	intron (NM_032151, intron 2 of 3)	intron (NM_032151, intron 2 of 3)	19306	NM_032151	84105		NM_032151	ENSG00000132570	PCBD2	DCOH2|DCOHM|PHS2	pterin-4 alpha-carbinolamine dehydratase 2	protein-coding
18521	chr2	87824896	87825241	+	248	NA	intron (NM_001024457, intron 1 of 22).2	intron (NM_001024457, intron 1 of 22).2	699	NM_001078170	729857		NM_001078170	ENSG00000185304	RGPD2	NUP358|RANBP2L2|RGP2	RANBP2 like and GRIP domain containing 2	protein-coding
12630	chr18	47853209	47853515	+	218	NA	intron (NM_001135937, intron 5 of 9)	intron (NM_001135937, intron 5 of 9)	77297	NM_005901	4087		NM_005901	ENSG00000175387	SMAD2	CHTD8|JV18|JV18-1|LDS6|MADH2|MADR2|hMAD-2|hSMAD2	SMAD family member 2	protein-coding
12111	chr17	22524406	22524600	+	211	NA	3' UTR (NM_001190452, exon 1 of 1)	3' UTR (NM_001190452, exon 1 of 1)	1392	NM_001190452	100462977		NM_001190452		MTRNR2L1	HN1	MT-RNR2 like 1 (pseudogene)	pseudo
221560	chr7	73745722	73746670	+	139	NA	Intergenic	AluJo|SINE|Alu	-7329	NM_001321382
69744	chr2	88018152	88019204	+	137	NA	Intergenic	Intergenic	-32888	NM_001024457	400966		NM_001024457	ENSG00000187627	RGPD1	RGP1|RGPD2|RanBP2L2|ranBP2L6	RANBP2 like and GRIP domain containing 1	protein-coding
193520	chr10	80456857	80457004	+	113	NA	intron (NM_001128309, intron 1 of 5)	AluSq2|SINE|Alu	-2355	NM_001351269	81619		NM_030927	ENSG00000108219	TSPAN14	DC-TM4F2|TM4SF14|tspan-14	tetraspanin 14	protein-coding
14721	chr5	134926572	134927391	+	112	NA	intron (NM_032151, intron 2 of 3)	intron (NM_032151, intron 2 of 3)	21850	NM_032151	84105		NM_032151	ENSG00000132570	PCBD2	DCOH2|DCOHM|PHS2	pterin-4 alpha-carbinolamine dehydratase 2	protein-coding
130584	chr19	38690241	38690739	+	105	NA	intron (NM_004924, intron 1 of 20)	LTR17|LTR|ERV1	42841	NM_001322033	81		NM_004924	ENSG00000130402	ACTN4	ACTININ-4|FSGS|FSGS1	actinin alpha 4	protein-coding
53518	chr4	49147078	49148035	+	98	NA	Intergenic	(TCCAT)n|Simple_repeat|Simple_repeat	160914	NM_001286791	80157		NM_025087	ENSG00000109182	CWH43	CWH43-C|PGAP2IP	cell wall biogenesis 43 C-terminal homolog	protein-coding
211173	chr11	20009191	20010767	+	98	NA	intron (NM_145117, intron 11 of 37)	L2c|LINE|L2	-12577	NM_001111019	89797		NM_145117	ENSG00000166833	NAV2	HELAD1|POMFIL2|RAINB1|STEERIN2|UNC53H2	neuron navigator 2	protein-coding
49013	chr10	32957244	32957965	+	96	NA	intron (NM_002211, intron 1 of 15)	CpG	290	NM_133376	3688		NM_002211	ENSG00000150093	ITGB1	CD29|FNRB|GPIIA|MDF2|MSK12|VLA-BETA|VLAB	integrin subunit beta 1	protein-coding
54219	chr2	86441902	86443147	+	95	NA	intron (NM_001146688, intron 2 of 25)	intron (NM_001146688, intron 2 of 25)	1063	NM_001146688	55818		NM_018433	ENSG00000115548	KDM3A	JHDM2A|JHMD2A|JMJD1|JMJD1A|TSGA	lysine demethylase 3A	protein-coding
90298	chr11	69419924	69421210	+	91	NA	Intergenic	Intergenic	-5088	NM_001319657	102724265		NM_001319657	ENSG00000255980	LINC02953	-	long intergenic non-protein coding RNA 2953	ncRNA
84646	chr1	202015229	202016423	+	86	NA	3' UTR (NM_001114309, exon 9 of 9)	3' UTR (NM_001114309, exon 9 of 9)	5239	NM_004433	1999		NM_004433	ENSG00000163435	ELF3	EPR-1|ERT|ESE-1|ESX	E74 like ETS transcription factor 3	protein-coding
149707	chr22	36354672	36356413	+	85	NA	intron (NM_002473, intron 1 of 40)	intron (NM_002473, intron 1 of 40)	32425	NM_002473	4627		NM_002473	ENSG00000100345	MYH9	BDPLT6|DFNA17|EPSTS|FTNS|MATINS|MHA|NMHC-II-A|NMMHC-IIA|NMMHCA	myosin heavy chain 9	protein-coding
78846	chr11	64237163	64238696	+	85	NA	intron (NM_003377, intron 6 of 6)	L2c|LINE|L2	-3166	NM_004470	2286		NM_004470	ENSG00000173486	FKBP2	FKBP-13|FKBP13|PPIase	FKBP prolyl isomerase 2	protein-coding
109559	chr1	16649167	16649953	+	84	NA	intron (NR_027504, intron 11 of 13)	intron (NR_027504, intron 11 of 13)	3986	NR_027504	11209		NR_027504		MST1P2	MSPL-1|MSPL-2|MSPL-3|MSPL1|MSPL2|MSPL3|MSTP1|MSTP2|MSTP3	macrophage stimulating 1 pseudogene 2	pseudo
110331	chr17	17706066	17707625	+	80	NA	intron (NM_030665, intron 1 of 5)	intron (NM_030665, intron 1 of 5)	25387	NM_030665	10743		NM_017574	ENSG00000108557	RAI1	SMCR|SMS	retinoic acid induced 1	protein-coding
135538	chr1	150558315	150560316	+	79	NA	TTS (NM_025008)	TTS (NM_025008)	7386	NR_036211	100422997		NR_036211	ENSG00000264553	MIR4257	-	microRNA 4257	ncRNA
123137	chr5	168320019	168321429	+	77	NA	intron (NM_015238, intron 1 of 22)	intron (NM_015238, intron 1 of 22)	29079	NM_001161662	23286		NM_015238	ENSG00000113645	WWC1	HBEBP3|HBEBP36|KIBRA|MEMRYQTL|PPP1R168	WW and C2 domain containing 1	protein-coding
31008	chr12	15628108	15631652	+	74	NA	intron (NM_004447, intron 18 of 20)	L2|LINE|L2	83269	NM_030671	5800		NM_002848	ENSG00000151490	PTPRO	GLEPP1|NPHS6|PTP-OC|PTP-U2|PTPROT|PTPU2|R-PTP-O	protein tyrosine phosphatase receptor type O	protein-coding
158441	chr17	2391837	2393968	+	72	NA	intron (NM_020310, intron 4 of 5)	CpG	8158	NM_020310	4335		NM_020310	ENSG00000070444	MNT	MAD6|MXD6|ROX|bHLHd3|lncRNA-HAL	MAX network transcriptional repressor	protein-coding
50551	chr2	98703410	98705511	+	70	NA	intron (NM_012214, intron 2 of 15)	AluJo|SINE|Alu	26672	NM_012214	11320		NM_012214	ENSG00000071073	MGAT4A	GNT-IV|GNT-IVA|GnT-4a	alpha-1,3-mannosyl-glycoprotein 4-beta-N-acetylglucosaminyltransferase A	protein-coding
104732	chr21	45433905	45435125	+	70	NA	intron (NM_001379500, intron 2 of 41)	intron (NM_001379500, intron 2 of 41)	-9445	NR_027498	378832		NM_199175	ENSG00000183535	COL18A1-AS1	C21orf123|NCRNA00175|PRED80	COL18A1 antisense RNA 1	ncRNA
70889	chr20	32459585	32461676	+	68	NA	intron (NM_080616, intron 2 of 7)	intron (NM_080616, intron 2 of 7)	22860	NM_080616	140688		NM_080616	ENSG00000197183	NOL4L	C20orf112|C20orf113	nucleolar protein 4 like	protein-coding
50647	chr19	47511648	47513665	+	67	NA	intron (NR_038456, intron 1 of 11)	intron (NR_038456, intron 1 of 11)	2407	NR_038457	8775		NM_003827	ENSG00000105402	NAPA	SNAPA	NSF attachment protein alpha	protein-coding
108756	chr20	47314649	47316364	+	66	NA	intron (NM_001281781, intron 2 of 20)	intron (NM_001281781, intron 2 of 20)	-2996	NR_024594	100131496		NR_024594	ENSG00000267882	LOC100131496	-	uncharacterized LOC100131496	ncRNA
23580	chr14	58199474	58200956	+	65	NA	promoter-TSS (NM_018477)	promoter-TSS (NM_018477)	66	NM_018477	55860		NM_018477	ENSG00000131966	ACTR10	ACTR11|Arp10|Arp11|HARP11	actin related protein 10	protein-coding
107645	chr17	7838450	7839675	+	63	NA	promoter-TSS (NM_001080424)	promoter-TSS (NM_001080424)	-844	NM_001348716	23135		NM_001080424	ENSG00000132510	KDM6B	JMJD3|NEDCFSA|NEDSST	lysine demethylase 6B	protein-coding
42322	chr1	234640694	234641612	+	62	NA	Intergenic	Tigger15a|DNA|TcMar-Tigger	-5136	NR_125944	101927787		NR_125944	ENSG00000228044	LOC101927787	-	uncharacterized LOC101927787	ncRNA
81906	chr7	29339320	29339720	+	60	NA	intron (NM_001293070, intron 2 of 13)	intron (NM_001293070, intron 2 of 13)	-130550	NR_120522	102724484		NR_120522		CHN2-AS1	-	CHN2 antisense RNA 1	ncRNA
18997	chr3	124887164	124887876	+	59	NA	promoter-TSS (NM_002213)	promoter-TSS (NM_002213)	-155	NM_002213	3693		NM_002213	ENSG00000082781	ITGB5	-	integrin subunit beta 5	protein-coding
21237	chr11	102602927	102604634	+	59	NA	intron (NM_004771, intron 6 of 9)	intron (NM_004771, intron 6 of 9)	21552	NM_004771	9313		NM_004771	ENSG00000137674	MMP20	AI2A2|MMP-20	matrix metallopeptidase 20	protein-coding
83206	chr17	81515069	81516838	+	57	NA	Intergenic	AluSz|SINE|Alu	-3154	NM_001199954	71		NM_001614	ENSG00000184009	ACTG1	ACT|ACTG|DFNA20|DFNA26|HEL-176	actin gamma 1	protein-coding
39707	chr3	48560253	48561663	+	57	NA	TTS (NM_033199)	TTS (NM_033199)	171	NM_001317136	5210		NM_004567	ENSG00000114268	PFKFB4	-	6-phosphofructo-2-kinase/fructose-2,6-biphosphatase 4	protein-coding
137190	chr15	37094141	37095004	+	57	NA	exon (NM_001220482, exon 6 of 13)	exon (NM_001220482, exon 6 of 13)	4124	NM_172315	4212		NM_002399	ENSG00000134138	MEIS2	CPCMR|HsT18361|MRG1	Meis homeobox 2	protein-coding
80498	chr7	100265931	100267254	+	56	NA	intron (NR_166147, intron 1 of 4)	intron (NR_166147, intron 1 of 4)	5613	NR_166147	352954		NM_178831	ENSG00000291122	CASTOR3P	CASTOR3|GATS|STAG3OS	CASTOR family member 3, pseudogene	pseudo
50178	chr19	5958186	5960172	+	54	NA	intron (NM_003624, intron 1 of 16)	intron (NM_003624, intron 1 of 16)	18961	NM_003624	8498		NM_003624	ENSG00000031823	RANBP3	-	RAN binding protein 3	protein-coding
141599	chr19	38654638	38655764	+	54	NA	intron (NM_004924, intron 1 of 20)	MER113|DNA|hAT-Charlie	7552	NM_001322033	81		NM_004924	ENSG00000130402	ACTN4	ACTININ-4|FSGS|FSGS1	actinin alpha 4	protein-coding
31585-2	chr5	32329317	32332404	+	54	NA	Intergenic	Intergenic	-17921	NM_001294343	54545		NM_019061	ENSG00000150712	MTMR12	3-PAP|PIP3AP	myotubularin related protein 12	protein-coding
9425	chr4	156941880	156942543	+	52	NA	intron (NR_036641, intron 1 of 6)	intron (NR_036641, intron 1 of 6)	29588	NM_016205	56034		NM_016205	ENSG00000145431	PDGFC	FALLOTEIN|SCDGF	platelet derived growth factor C	protein-coding
14998	chr3	114899292	114900033	+	52	NA	intron (NM_001164343, intron 3 of 11)	intron (NM_001164343, intron 3 of 11)	963	NR_121662	26137		NM_015642	ENSG00000181722	ZBTB20	DPZF|HOF|ODA-8S|PRIMS|ZNF288	zinc finger and BTB domain containing 20	protein-coding
22044	chr8	12753425	12754635	+	52	NA	intron (NM_001329976, intron 1 of 11).2	intron (NM_001329976, intron 1 of 11).2	1496	NM_001329976	91694		NM_152271	ENSG00000154359	LONRF1	RNF191	LON peptidase N-terminal domain and ring finger 1	protein-coding
21088	chr19	55646857	55648267	+	51	NA	promoter-TSS (NM_001370471)	promoter-TSS (NM_001370471)	-26	NM_013301	29903		NM_013301	ENSG00000173581	CCDC106	HSU79303|ZNF581	coiled-coil domain containing 106	protein-coding
65965	chr11	102113090	102113463	+	50	NA	intron (NM_001195045, intron 1 of 8)	intron (NM_001195045, intron 1 of 8)	828	NM_001195045	10413		NM_006106	ENSG00000137693	YAP1	COB1|YAP|YAP-1|YAP2|YAP65|YKI	Yes1 associated transcriptional regulator	protein-coding
62295	chr7	130370831	130371093	+	50	NA	Intergenic	Intergenic	-3835	NR_133928	105375504		NR_133928		LOC105375504	-	uncharacterized LOC105375504	ncRNA
44424	chr16	34584637	34588594	+	50	NA	Intergenic	Intergenic	-205135	NR_158158	102724928		NR_158158		CCNYL3	CCNYL1B	cyclin Y like 3 (pseudogene)	pseudo
18097	chr5	28862235	28863104	+	49	NA	Intergenic	AluSz|SINE|Alu	-64201	NR_033961	729862		NR_033961		LSP1P3	-	LSP1 pseudogene 3	pseudo
16079	chrUn_GL000216v2	149288	151495	+	49	NA	NA	BSR/Beta|Satellite|Satellite	NA	NA
19399	chr22	35257183	35258858	+	48	NA	intron (NM_001362972, intron 1 of 9)	(GGCTGC)n|Simple_repeat|Simple_repeat	527	NM_001362972	10042		NM_005487	ENSG00000100281	HMGXB4	HMG2L1|HMGBCG|P53N|THC211630	HMG-box containing 4	protein-coding
32573	chr10	93990720	93993104	+	48	NA	Intergenic	Intergenic	-2019	NM_001288989	51196		NM_016341	ENSG00000138193	PLCE1	NPHS3|PLCE|PPLC	phospholipase C epsilon 1	protein-coding
10652-2	chrY	11326215	11327046	+	48	NA	Intergenic	BSR/Beta|Satellite|Satellite	1094960	NR_033667	352887		NR_033667	ENSG00000291034	GYG2P1	GYG2P	glycogenin 2 pseudogene 1	pseudo
9185	chr6	170145714	170146803	+	48	NA	Intergenic	Intergenic	-14384	NR_125878	102724511		NR_125878	ENSG00000232197	LOC102724511	-	uncharacterized LOC102724511	ncRNA
16190-3	chr3	72956781	72957903	+	47	NA	exon (NM_001080393, exon 5 of 7)	exon (NM_001080393, exon 5 of 7)	-39401	NM_001318026	151987		NM_174907	ENSG00000163605	PPP4R2	PP4R2	protein phosphatase 4 regulatory subunit 2	protein-coding
49294	chr9	34992313	34994323	+	47	NA	exon (NM_001349723, exon 3 of 5)	exon (NM_001349723, exon 3 of 5)	3028	NM_001135005	25822		NM_012266	ENSG00000137094	DNAJB5	Hsc40	DnaJ heat shock protein family (Hsp40) member B5	protein-coding
20778	chr4	76588948	76591076	+	47	NA	intron (NM_020859, intron 2 of 10)	intron (NM_020859, intron 2 of 10)	14461	NR_039655	100616254		NR_039655	ENSG00000283682	MIR548AH	-	microRNA 548ah	ncRNA
17960	chr14_GL000225v1_random	5988	7316	+	47	NA	NA	BSR/Beta|Satellite|Satellite	NA	NA
9620	chr17_KI270729v1_random	27441	28009	+	46	NA	NA	(GAATG)n|Satellite|Satellite	NA	NA
20055	chr15	84929600	84930852	+	46	NA	intron (NM_001287761, intron 11 of 14)	intron (NM_001287761, intron 11 of 14)	45564	NM_201651	9154		NM_004213	ENSG00000156222	SLC28A1	CNT1|HCNT1|URCTU	solute carrier family 28 member 1	protein-coding
17581	chr20	53593883	53595002	+	46	NA	promoter-TSS (NM_001385034)	promoter-TSS (NM_001385034)	-603	NM_001385034	7764		NM_006526	ENSG00000171940	ZNF217	ZABC1	zinc finger protein 217	protein-coding
28003	chr3	169323118	169324453	+	46	NA	intron (NM_001205194, intron 1 of 15)	intron (NM_001205194, intron 1 of 15)	-124082	NR_134932	105374205		NR_134932	ENSG00000241479	MECOM-AS1	-	MECOM antisense RNA 1	ncRNA
15250	chr3	171002029	171003022	+	46	NA	intron (NM_000340, intron 8 of 10)	intron (NM_000340, intron 8 of 10)	24195	NM_000340	6514		NM_000340	ENSG00000163581	SLC2A2	GLUT2	solute carrier family 2 member 2	protein-coding
40444	chr22_KI270733v1_random	135631	136509	+	46	NA	TTS (NR_003287)	TTS (NR_003287)	5866	NR_145822	106632264		NR_145822		RNA28SN1	RNA28S4	RNA, 28S ribosomal N1	rRNA
15608	chr18	23502742	23503826	+	46	NA	promoter-TSS (NM_001318707)	promoter-TSS (NM_001318707)	-186	NM_001276342	29919		NM_013326	ENSG00000141452	RMC1	C18orf8|HsT2591|MIC1|Mic-1|WDR98	regulator of MON1-CCZ1	protein-coding
21011	chr6	12202218	12204348	+	45	NA	Intergenic	Intergenic	-87078	NM_001955	1906		NM_001955	ENSG00000078401	EDN1	ARCND3|ET1|HDLCQ7|PPET1|QME	endothelin 1	protein-coding
26023	chr4	49152994	49155365	+	45	NA	Intergenic	(TCCAT)n|Simple_repeat|Simple_repeat	167537	NM_001286791	80157		NM_025087	ENSG00000109182	CWH43	CWH43-C|PGAP2IP	cell wall biogenesis 43 C-terminal homolog	protein-coding
24256	chr11	951916	953781	+	45	NA	intron (NR_144509, intron 1 of 20)	intron (NR_144509, intron 1 of 20)	26978	NR_144509	161		NM_012305	ENSG00000183020	AP2A2	ADTAB|CLAPA2|HIP-9|HIP9|HYPJ	adaptor related protein complex 2 subunit alpha 2	protein-coding
86591	chr12	52900956	52902505	+	45	NA	intron (NR_045962, intron 3 of 8)	MER94|DNA|hAT-Blackjack	-2746	NR_162090	113218482		NR_162090		MIR9898	-	microRNA 9898	ncRNA
33562	chr10	121929073	121929154	+	44	NA	promoter-TSS (NM_001288736)	promoter-TSS (NM_001288736)	-312	NM_001288736	11101		NM_007041	ENSG00000107669	ATE1	-	arginyltransferase 1	protein-coding
36718	chr11	67505612	67506742	+	44	NA	promoter-TSS (NM_004910)	promoter-TSS (NM_004910)	-814	NM_001130848	9600		NM_004910	ENSG00000110697	PITPNM1	DRES9|NIR2|PITPNM|RDGB|RDGB1|RDGBA|RDGBA1|Rd9	phosphatidylinositol transfer protein membrane associated 1	protein-coding
20817	chr9	100352191	100353433	+	44	NA	promoter-TSS (NM_001161584)	promoter-TSS (NM_001161584)	130	NM_017746	54881		NM_017746	ENSG00000136891	TEX10	Ipi1|bA208F1.2	testis expressed 10	protein-coding
14199	chr8	81999460	82000631	+	43	NA	Intergenic	Intergenic	-157759	NM_022133	64089		NM_022133	ENSG00000104497	SNX16	-	sorting nexin 16	protein-coding
16838	chr21	34526151	34527355	+	43	NA	promoter-TSS (NM_203418)	promoter-TSS (NM_203418)	69	NM_203418	1827		NM_004414	ENSG00000159200	RCAN1	ADAPT78|CSP1|DSC1|DSCR1|MCIP1|RCN1	regulator of calcineurin 1	protein-coding
30022	chr9	131419362	131419667	+	43	NA	intron (NM_013318, intron 1 of 31)	intron (NM_013318, intron 1 of 31)	25428	NM_001384818	84726		NM_013318	ENSG00000288701	PRRC2B	BAT2L|BAT2L1|KIAA0515|LQFBS-1	proline rich coiled-coil 2B	protein-coding
20210	chr2	215618934	215620438	+	43	NA	intron (NR_037195, intron 8 of 9)	intron (NR_037195, intron 8 of 9)	-98357	NR_132383	105373869		NR_132383	ENSG00000230838	LINC01614	LCAL4	long intergenic non-protein coding RNA 1614	ncRNA
21369	chr3	174440781	174441906	+	43	NA	Intergenic	CpG	-417991	NM_207015	254827		NM_207015	ENSG00000177694	NAALADL2	-	N-acetylated alpha-linked acidic dipeptidase like 2	protein-coding
25483	chr1	51690149	51692533	+	43	NA	intron (NM_024586, intron 3 of 23)	AluSg|SINE|Alu	-38509	NM_148907	114883		NM_024586	ENSG00000117859	OSBPL9	ORP-9|ORP9	oxysterol binding protein like 9	protein-coding
14113	chr4	38662412	38663561	+	43	NA	intron (NR_026804, intron 1 of 7)	intron (NR_026804, intron 1 of 7)	-1213	NM_016531	51274		NM_016531	ENSG00000109787	KLF3	BKLF	KLF transcription factor 3	protein-coding
24851	chr3	49721599	49721931	+	43	NA	TTS (NM_022064)	TTS (NM_022064)	-2081	NM_198722	386724		NM_198722	ENSG00000176020	AMIGO3	ALI3|AMIGO-3	adhesion molecule with Ig like domain 3	protein-coding
30022-2	chr9	131420399	131421819	+	43	NA	intron (NM_013318, intron 1 of 31)	MER58A|DNA|hAT-Charlie	27023	NM_001384818	84726		NM_013318	ENSG00000288701	PRRC2B	BAT2L|BAT2L1|KIAA0515|LQFBS-1	proline rich coiled-coil 2B	protein-coding
13694-2	chr18	27143692	27144667	+	43	NA	intron (NM_031422, intron 1 of 5)	intron (NM_031422, intron 1 of 5)	41129	NM_001256316	83539		NM_031422	ENSG00000154080	CHST9	GALNAC4ST-2|GalNAc4ST2	carbohydrate sulfotransferase 9	protein-coding
17683	chr3	172095096	172097479	+	43	NA	intron (NM_001135095, intron 1 of 25)	intron (NM_001135095, intron 1 of 25)	55756	NM_001135095	64778		NM_022763	ENSG00000075420	FNDC3B	FAD104|PRO4979|YVTM2421	fibronectin type III domain containing 3B	protein-coding
44320	chr7	100824441	100827161	+	43	NA	intron (NM_004444, intron 1 of 16)	intron (NM_004444, intron 1 of 16)	-1068	NM_001363494	56996		NM_020246	ENSG00000146828	SLC12A9	CCC6|CIP1|WO3.3|hCCC6	solute carrier family 12 member 9	protein-coding
20718-2	chr15	73051695	73052311	+	42	NA	promoter-TSS (NM_002499)	promoter-TSS (NM_002499)	-460	NM_002499	4756		NM_002499	ENSG00000067141	NEO1	IGDCC2|NGN|NTN1R2	neogenin 1	protein-coding
20383	chrX	120250531	120252189	+	42	NA	intron (NM_006777, intron 1 of 1)	intron (NM_006777, intron 1 of 1)	548	NM_001184742	10009		NM_006777	ENSG00000177485	ZBTB33	ZNF-kaiso|ZNF348	zinc finger and BTB domain containing 33	protein-coding
51061	chr20	50740798	50742322	+	42	NA	intron (NM_032521, intron 2 of 2)	AluY|SINE|Alu	9980	NM_032521	84612		NM_032521	ENSG00000124171	PARD6B	PAR6B	par-6 family cell polarity regulator beta	protein-coding
14060	chr20	58891964	58892860	+	42	NA	intron (NR_132272, intron 1 of 3)	CpG-17921	249	NR_132272	2778		NM_000516	ENSG00000087460	GNAS	AHO|C20orf45|GNAS1|GPSA|GSA|GSP|NESP|PITA3|POH|SCG6|SgVI	GNAS complex locus	protein-coding
15124	chr10	32982963	32984235	+	42	NA	Intergenic	Intergenic	-25369	NM_002211	3688		NM_002211	ENSG00000150093	ITGB1	CD29|FNRB|GPIIA|MDF2|MSK12|VLA-BETA|VLAB	integrin subunit beta 1	protein-coding
12923	chr1	192539389	192540181	+	42	NA	Intergenic	Intergenic	-35988	NM_002922	5996		NM_002922	ENSG00000090104	RGS1	1R20|BL34|HEL-S-87|IER1|IR20	regulator of G protein signaling 1	protein-coding
22145	chr10	73552530	73554073	+	42	NA	promoter-TSS (NR_135250)	promoter-TSS (NR_135250)	39	NR_135250	159195		NM_152586	ENSG00000166348	USP54	C10orf29|bA137L10.3|bA137L10.4	ubiquitin specific peptidase 54	protein-coding
20718-3	chr15	73052775	73053658	+	42	NA	intron (NM_001172623, intron 1 of 27)	intron (NM_001172623, intron 1 of 27)	732	NM_001172623	4756		NM_002499	ENSG00000067141	NEO1	IGDCC2|NGN|NTN1R2	neogenin 1	protein-coding
35707	chr20	11270988	11271057	+	42	NA	intron (NR_038972, intron 1 of 1)	LTR33|LTR|ERVL	2361	NR_038972	339593		NR_038972		LOC339593	-	uncharacterized LOC339593	ncRNA
15259	chr13	80217729	80219041	+	42	NA	Intergenic	HAL1ME|LINE|L1	121274	NM_001318538	10253		NM_005842	ENSG00000136158	SPRY2	IGAN3|hSPRY2	sprouty RTK signaling antagonist 2	protein-coding
20509	chr20	2508139	2509663	+	41	NA	promoter-TSS (NM_024325)	promoter-TSS (NM_024325)	14	NM_001321800	79175		NM_024325	ENSG00000088876	ZNF343	dJ734P14.5	zinc finger protein 343	protein-coding
33364	chr10	86757052	86758014	+	41	NA	intron (NM_004329, intron 1 of 12)	intron (NM_004329, intron 1 of 12)	914	NM_004329	657		NM_004329	ENSG00000107779	BMPR1A	10q23del|ACVRLK3|ALK-3|ALK3|BMPR-1A|CD292|SKR5	bone morphogenetic protein receptor type 1A	protein-coding
44151	chr5	74638563	74639044	+	41	NA	intron (NM_001256574, intron 1 of 3)	intron (NM_001256574, intron 1 of 3)	-1220	NM_001292004	3074		NM_000521	ENSG00000049860	HEXB	ENC-1AS|HEL-248|HEL-S-111	hexosaminidase subunit beta	protein-coding
27967	chr13	73324491	73327198	+	41	NA	Intergenic	Intergenic	-238400	NR_047009	100874155		NR_047009		LINC00392	-	long intergenic non-protein coding RNA 392	ncRNA
17964	chr8	26295815	26297475	+	41	NA	intron (NM_002717, intron 2 of 9)	intron (NM_002717, intron 2 of 9)	3429	NM_001177591	5520		NM_002717	ENSG00000221914	PPP2R2A	B55A|B55ALPHA|PR52A|PR55A|PR55alpha	protein phosphatase 2 regulatory subunit Balpha	protein-coding
12215	chr2	193142440	193143032	+	41	NA	Intergenic	LTR5_Hs|LTR|ERVK	392891	NR_002769	64002		NR_002769	ENSG00000227418	PCGEM1	LINC00071|NCRNA00071|PCAT9	PCGEM1 prostate-specific transcript	ncRNA
17161	chr1	28914871	28915662	+	41	NA	intron (NM_001376013, intron 1 of 20)	CpG	690	NM_001166006	2035		NM_004437	ENSG00000159023	EPB41	4.1R|EL1|HE	erythrocyte membrane protein band 4.1	protein-coding
16114	chr8	31033325	31034438	+	41	NA	promoter-TSS (NM_001323311)	promoter-TSS (NM_001323311)	71	NM_000553	7486		NM_000553	ENSG00000165392	WRN	RECQ3|RECQL2|RECQL3	WRN RecQ like helicase	protein-coding
28276	chr4	22514725	22515678	+	40	NA	promoter-TSS (NR_162129)	promoter-TSS (NR_162129)	-111	NR_162129	113219450		NR_162129		MIR12115	-	microRNA 12115	ncRNA
21044	chr16	89686158	89688055	+	40	NA	intron (NR_027703, intron 1 of 11)	CpG	417	NM_052988	8558		NM_003674	ENSG00000185324	CDK10	ALSAS|PISSLRE	cyclin dependent kinase 10	protein-coding
19547	chr14	67694670	67695788	+	40	NA	intron (NM_016026, intron 1 of 6)	intron (NM_016026, intron 1 of 6)	535	NM_001252650	51109		NM_016026	ENSG00000072042	RDH11	ARSDR1|CGI82|HCBP12|MDT1|PSDR1|RALR1|RDJCSS|SCALD|SDR7C1	retinol dehydrogenase 11	protein-coding
42788	chr17	81389882	81394299	+	40	NA	Intergenic	Intergenic	-3367	NM_001291324	57597		NM_024696	ENSG00000266074	BAHCC1	BAHD2	BAH domain and coiled-coil containing 1	protein-coding
48346	chr14_GL000225v1_random	119935	121987	+	40	NA	NA	BSR/Beta|Satellite|Satellite	NA	NA
35764	chr16	68739169	68740831	+	40	NA	intron (NM_004360, intron 2 of 15)	intron (NM_004360, intron 2 of 15)	2708	NM_001317185	999		NM_004360	ENSG00000039068	CDH1	Arc-1|BCDS1|CD324|CDHE|ECAD|LCAM|UVO	cadherin 1	protein-coding
17767	chr10	121337225	121338950	+	40	NA	Intergenic	Intergenic	193227	NM_001320654	2263		NM_000141	ENSG00000066468	FGFR2	BBDS|BEK|BFR-1|CD332|CEK3|CFD1|ECT1|JWS|K-SAM|KGFR|TK14|TK25	fibroblast growth factor receptor 2	protein-coding
13543	chr11	82817955	82819007	+	40	NA	Intergenic	LTR22|LTR|ERVK	81949	NM_005040	5547		NM_005040	ENSG00000137509	PRCP	HUMPCP|PCP	prolylcarboxypeptidase	protein-coding
20599	chr2	241701025	241702101	+	40	NA	promoter-TSS (NM_001330162)	promoter-TSS (NM_001330162)	-476	NM_001330162	84289		NM_032329	ENSG00000168395	ING5	p28ING5	inhibitor of growth family member 5	protein-coding
9351-2	chr20	58388813	58389970	+	40	NA	non-coding (NR_036633, exon 1 of 4)	non-coding (NR_036633, exon 1 of 4)	162	NM_001195677	9217		NM_004738	ENSG00000124164	VAPB	ALS8|VAMP-B|VAP-B	VAMP associated protein B and C	protein-coding
12680	chr6	62998943	63000060	+	39	NA	Intergenic	LTR10D|LTR|ERV1	320476	NM_001143940	51557		NM_016571	ENSG00000146166	LGSN	GLULD1|LGS	lengsin, lens protein with glutamine synthetase domain	protein-coding
16384	chr10	21533345	21534489	+	39	NA	promoter-TSS (NM_004641)	promoter-TSS (NM_004641)	-255	NM_001195630	8028		NM_004641	ENSG00000078403	MLLT10	AF10	MLLT10 histone lysine methyltransferase DOT1L cofactor	protein-coding
10757-2	chr15	64387612	64388317	+	39	NA	promoter-TSS (NR_109934)	promoter-TSS (NR_109934)	128	NM_016213	9325		NM_016213	ENSG00000103671	TRIP4	ASC-1|ASC1|HsT17391|MDCDC|SMABF1|ZC2HC5	thyroid hormone receptor interactor 4	protein-coding
17312	chr3	114902276	114903991	+	39	NA	intron (NM_001164343, intron 2 of 11)	MIRb|SINE|MIR	-2508	NR_121662	26137		NM_015642	ENSG00000181722	ZBTB20	DPZF|HOF|ODA-8S|PRIMS|ZNF288	zinc finger and BTB domain containing 20	protein-coding
74738	chr11	61760646	61762293	+	39	NA	intron (NM_013279, intron 1 of 25)	intron (NM_013279, intron 1 of 25)	-3805	NR_026882	26070		NR_026882	ENSG00000124915	MYRF-AS1	DKFZP434K028	MYRF antisense RNA 1	ncRNA
30687	chr12	123994924	123999192	+	39	NA	intron (NM_001204298, intron 3 of 4)	intron (NM_001204298, intron 3 of 4)	23843	NM_001347902	100533183		NM_001204299	ENSG00000178882	ZNF664-RFLNA	-	ZNF664-RFLNA readthrough	protein-coding
28270	chr1	149792251	149794866	+	39	NA	intron (NR_166122, intron 6 of 6)	intron (NR_166122, intron 6 of 6)	10864	NM_001378810	2209		NM_000566	ENSG00000150337	FCGR1A	CD64|CD64A|FCG1|FCGR1|FCRI|FcgammaRI|IGFR1	Fc gamma receptor Ia	protein-coding
26319	chr20	35276521	35279338	+	39	NA	TTS (NR_052023)	TTS (NR_052023)	193	NR_149148	101410538		NM_001355003	ENSG00000126005	MMP24OS	MMP24-AS1	MMP24 opposite strand	protein-coding
17657-2	chr5	38147102	38148784	+	39	NA	promoter-TSS (NR_134272)	promoter-TSS (NR_134272)	-537	NR_134272	101929745		NR_134272	ENSG00000248461	LINC02119	-	long intergenic non-protein coding RNA 2119	ncRNA
15134	chr12	32533885	32534585	+	39	NA	promoter-TSS (NM_001384130)	promoter-TSS (NM_001384130)	-58	NM_001304480	121512		NM_139241	ENSG00000139132	FGD4	CMT4H|FRABP|ZFYVE6	FYVE, RhoGEF and PH domain containing 4	protein-coding
10526-2	chr15	96036439	96037494	+	39	NA	Intergenic	Intergenic	90875	NR_158193	105369212		NR_158193		LOC105369212	-	uncharacterized LOC105369212	ncRNA
20927	chr8	42657930	42659587	+	39	NA	Intergenic	MER1A|DNA|hAT-Charlie	-38608	NM_000749	1142		NM_000749	ENSG00000147432	CHRNB3	-	cholinergic receptor nicotinic beta 3 subunit	protein-coding
15701	chr11	94543520	94544430	+	39	NA	5' UTR (NM_002033, exon 1 of 1)	5' UTR (NM_002033, exon 1 of 1)	124	NM_002033	2526		NM_002033	ENSG00000196371	FUT4	CD15|ELFT|FCT3A|FUC-TIV|FUTIV|LeX|SSEA-1	fucosyltransferase 4	protein-coding
12667	chr17	35119097	35119946	+	39	NA	intron (NM_133629, intron 1 of 6)	CpG	237	NR_037711	5892		NM_002878	ENSG00000185379	RAD51D	BROVCA4|R51H3|RAD51L3|TRAD	RAD51 paralog D	protein-coding
49807	chr19	6219642	6221355	+	38	NA	intron (NM_005934, intron 6 of 11)	intron (NM_005934, intron 6 of 11)	59477	NM_005934	4298		NM_005934	ENSG00000130382	MLLT1	ENL|LTG19|YEATS1	MLLT1 super elongation complex subunit	protein-coding
27126	chr4	89305124	89306598	+	38	NA	intron (NM_198281, intron 1 of 1)	intron (NM_198281, intron 1 of 1)	1939	NM_198281	285513		NM_198281	ENSG00000185477	GPRIN3	GRIN3	GPRIN family member 3	protein-coding
17401	chr2	28392204	28393870	+	38	NA	5' UTR (NM_005253, exon 1 of 4)	5' UTR (NM_005253, exon 1 of 4)	179	NM_005253	2355		NM_005253	ENSG00000075426	FOSL2	ACED|FRA2	FOS like 2, AP-1 transcription factor subunit	protein-coding
71741	chr12	56632043	56632968	+	38	NA	intron (NM_001351156, intron 1 of 30)	(CCACAC)n|Simple_repeat|Simple_repeat	-2179	NM_001300905	11176		NM_013449	ENSG00000076108	BAZ2A	TIP5|WALp3	bromodomain adjacent to zinc finger domain 2A	protein-coding
20105	chr14	75147213	75147732	+	38	NA	intron (NM_006827, intron 3 of 4)	AluSx|SINE|Alu	-20424	NM_033116	91754		NM_033116	ENSG00000119638	NEK9	APUG|LCCS10|NC|NERCC|NERCC1	NIMA related kinase 9	protein-coding
44008	chr2	27376880	27376983	+	38	NA	TTS (NM_001201459)	TTS (NM_001201459)	3513	NM_001201459	130557		NM_144631	ENSG00000163795	ZNF513	HMFT0656|RP58|Zfp513	zinc finger protein 513	protein-coding
16420	chr16	29943469	29944504	+	38	NA	Intergenic	L2c|LINE|L2	-17760	NM_178863	253980		NM_178863	ENSG00000174943	KCTD13	BACURD1|FKSG86|PDIP1|POLDIP1|hBACURD1	potassium channel tetramerization domain containing 13	protein-coding
13086	chr7	5822612	5823532	+	38	NA	promoter-TSS (NR_023382)	promoter-TSS (NR_023382)	-88	NR_023382	401303		NR_023382		ZNF815P	ZNF815	zinc finger protein 815, pseudogene	pseudo
12099	chr2	190356026	190356810	+	38	NA	intron (NM_001128928, intron 2 of 6)	intron (NM_001128928, intron 2 of 6)	12829	NM_001128928	3628		NM_002194	ENSG00000151689	INPP1	-	inositol polyphosphate-1-phosphatase	protein-coding
7668-2	chrY	11305155	11305676	+	38	NA	Intergenic	BSR/Beta|Satellite|Satellite	1116175	NR_033667	352887		NR_033667	ENSG00000291034	GYG2P1	GYG2P	glycogenin 2 pseudogene 1	pseudo
10205	chr15	34209848	34210458	+	38	NA	promoter-TSS (NM_024713)	promoter-TSS (NM_024713)	-57	NM_024713	79768		NM_024713	ENSG00000134152	KATNBL1	C15orf29	katanin regulatory subunit B1 like 1	protein-coding
11410	chr16	34575984	34576731	+	38	NA	Intergenic	Intergenic	-194877	NR_158158	102724928		NR_158158		CCNYL3	CCNYL1B	cyclin Y like 3 (pseudogene)	pseudo
33266	chr10	121552476	121555935	+	38	NA	intron (NM_001144918, intron 2 of 15)	intron (NM_001144918, intron 2 of 15)	-22891	NM_001320654	2263		NM_000141	ENSG00000066468	FGFR2	BBDS|BEK|BFR-1|CD332|CEK3|CFD1|ECT1|JWS|K-SAM|KGFR|TK14|TK25	fibroblast growth factor receptor 2	protein-coding
13908	chr3	30597103	30598310	+	37	NA	Intergenic	LTR82B|LTR|ERVL	-8796	NM_001024847	7048		NM_003242	ENSG00000163513	TGFBR2	AAT3|FAA3|LDS1B|LDS2|LDS2B|MFS2|RIIC|TAAD2|TBR-ii|TBRII|TGFR-2|TGFbeta-RII|tbetaR-II	transforming growth factor beta receptor 2	protein-coding
7641	chr3	44363479	44364198	+	37	NA	intron (NM_001282915, intron 4 of 10)	AluJo|SINE|Alu	25072	NM_173826	285343		NM_173826	ENSG00000179152	TCAIM	C3orf23|TOAG-1|TOAG1	T cell activation inhibitor, mitochondrial	protein-coding
23399	chr3	71133152	71133176	+	37	NA	promoter-TSS (NM_001349342)	promoter-TSS (NM_001349342)	-967	NM_001349342	27086		NM_032682	ENSG00000114861	FOXP1	12CC4|HSPC215|MFH|QRF1|hFKH1B	forkhead box P1	protein-coding
43531	chr1	47912338	47913980	+	37	NA	intron (NM_001194986, intron 2 of 6)	L3|LINE|CR1	84226	NM_001194986	388630		NM_001194986	ENSG00000269113	TRABD2B	TIKI2	TraB domain containing 2B	protein-coding
12779	chr2	211013790	211014926	+	37	NA	Intergenic	Intergenic	396787	NR_002763	29034		NM_014116	ENSG00000280837	CPS1-IT1	CPS1-IT|CPS1IT|CPS1IT1|PRO0132	CPS1 intronic transcript 1	ncRNA
48104	chr12	124911730	124912647	+	37	NA	exon (NM_021009, exon 2 of 2)	exon (NM_021009, exon 2 of 2)	2462	NM_021009	7316		NM_021009	ENSG00000150991	UBC	HMG20	ubiquitin C	protein-coding
27239	chr1	85200087	85202285	+	37	NA	promoter-TSS (NM_032184)	promoter-TSS (NM_032184)	-170	NM_032184	84144		NM_032184	ENSG00000097096	SYDE2	-	synapse defective Rho GTPase homolog 2	protein-coding
27499	chr9	96047724	96049473	+	37	NA	Intergenic	Intergenic	-17241	NR_033838	158435		NM_138497		LOC158435	-	uncharacterized LOC158435	ncRNA
18379	chr8	126588280	126589620	+	37	NA	Intergenic	Intergenic	-30472	NR_156466	157638		NM_174911	ENSG00000168672	LRATD2	BCMP101|FAM84B|NSE2	LRAT domain containing 2	protein-coding
22799	chr6	34887430	34888597	+	37	NA	promoter-TSS (NM_001270488)	promoter-TSS (NM_001270488)	29	NM_005643	6882		NM_005643	ENSG00000064995	TAF11	MGC:15243|PRO2134|TAF2I|TAFII28	TATA-box binding protein associated factor 11	protein-coding
43531-2	chr1	47914512	47916495	+	37	NA	intron (NM_001194986, intron 2 of 6)	intron (NM_001194986, intron 2 of 6)	81882	NM_001194986	388630		NM_001194986	ENSG00000269113	TRABD2B	TIKI2	TraB domain containing 2B	protein-coding
22187	chr7	8261202	8262977	+	37	NA	promoter-TSS (NM_001136020)	promoter-TSS (NM_001136020)	78	NM_001350833	3382		NM_004968	ENSG00000003147	ICA1	ICA69|ICAp69	islet cell autoantigen 1	protein-coding
48894	chr9	69185873	69189609	+	37	NA	intron (NM_001369871, intron 3 of 24)	L2c|LINE|L2	13464	NM_001369873	9414		NM_004817	ENSG00000119139	TJP2	C9DUPq21.11|DFNA51|DUP9q21.11|FHCA1|PFIC4|X104|ZO2	tight junction protein 2	protein-coding
20183	chr1	60832594	60834061	+	37	NA	Intergenic	Intergenic	-7743	NR_110628	101926964		NR_110628	ENSG00000231252	LOC101926964	-	uncharacterized LOC101926964	ncRNA
11629-2	chr16	70251685	70252517	+	37	NA	promoter-TSS (NM_058219)	promoter-TSS (NM_058219)	-161	NM_058219	118460		NM_058219	ENSG00000223496	EXOSC6	EAP4|MTR3|Mtr3p|hMtr3p|p11	exosome component 6	protein-coding
14543	chr1	169148027	169149314	+	37	NA	intron (NR_104229, intron 12 of 12)	intron (NR_104229, intron 12 of 12)	41980	NM_001677	481		NM_001677	ENSG00000143153	ATP1B1	ATP1B	ATPase Na+/K+ transporting subunit beta 1	protein-coding
20872	chr6	96923529	96924486	+	37	NA	promoter-TSS (NM_001286251)	promoter-TSS (NM_001286251)	-613	NM_001286250	114792		NM_052904	ENSG00000186231	KLHL32	BKLHD5|KIAA1900|UG0030H05|dJ21F7.1	kelch like family member 32	protein-coding
15959	chr11	16811980	16813158	+	37	NA	intron (NM_175058, intron 13 of 22)	intron (NM_175058, intron 13 of 22)	73922	NM_014267	10944		NM_014267	ENSG00000110696	C11orf58	IMAGE145052|SMAP	chromosome 11 open reading frame 58	protein-coding
18402	chr5	32444082	32445546	+	37	NA	promoter-TSS (NM_016107)	promoter-TSS (NM_016107)	-74	NM_016107	51663		NM_016107	ENSG00000056097	ZFR	SPG71|ZFR1	zinc finger RNA binding protein	protein-coding
19287	chr7	5240088	5241674	+	36	NA	Intergenic	AluSx1|SINE|Alu	26612	NM_001033520	26100		NM_015610	ENSG00000157954	WIPI2	ATG18B|Atg21|CGI-50|IDDSSA|WIPI-2	WD repeat domain, phosphoinositide interacting 2	protein-coding
12712	chr1	231422382	231422953	+	36	NA	promoter-TSS (NM_022051)	promoter-TSS (NM_022051)	-380	NM_001377260	54583		NM_022051	ENSG00000135766	EGLN1	C1orf12|ECYT3|HALAH|HIF-PH2|HIFPH2|HPH-2|HPH2|PHD2|SM20|ZMYND6	egl-9 family hypoxia inducible factor 1	protein-coding
11858	chr6	160254425	160255339	+	36	NA	intron (NM_003058, intron 2 of 10)	intron (NM_003058, intron 2 of 10)	3939	NM_003058	6582		NM_003058	ENSG00000112499	SLC22A2	2025-10-02	solute carrier family 22 member 2	protein-coding
29630	chr7	134866608	134867785	+	36	NA	intron (NM_033138, intron 2 of 14)	intron (NM_033138, intron 2 of 14)	-24204	NM_033139	800		NM_004342	ENSG00000122786	CALD1	CDM|H-CAD|HCAD|L-CAD|LCAD|NAG22|h-CD	caldesmon 1	protein-coding
17971	chr11	16355888	16357639	+	36	NA	promoter-TSS (NM_001367873)	promoter-TSS (NM_001367873)	-217	NM_001367873	55553		NM_017508	ENSG00000110693	SOX6	HSSOX6|SOXD|TOLCAS	SRY-box transcription factor 6	protein-coding
35940	chr11	102276399	102277545	+	36	NA	Intergenic	Intergenic	-40512	NM_182962	330		NM_001165	ENSG00000023445	BIRC3	AIP1|API2|CIAP2|HAIP1|HIAP1|IAP-1|MALT2|MIHC|RNF49|c-IAP2	baculoviral IAP repeat containing 3	protein-coding
7946	chr5	61408418	61409009	+	36	NA	intron (NM_020928, intron 1 of 13)	intron (NM_020928, intron 1 of 13)	76455	NM_020928	57688		NM_020928	ENSG00000130449	ZSWIM6	AFND|NEDMAGA	zinc finger SWIM-type containing 6	protein-coding
11086	chr3	129907954	129908942	+	36	NA	non-coding (NR_037893, exon 3 of 3)	non-coding (NR_037893, exon 3 of 3)	14577	NR_037893	100507032		NR_037893	ENSG00000271270	TMCC1-DT	TMCC1-AS1	TMCC1 divergent transcript	ncRNA
19267	chr16	31117267	31118541	+	36	NA	intron (NM_032188, intron 1 of 10)	G-rich|Low_complexity|Low_complexity	240	NM_032188	84148		NM_032188	ENSG00000103510	KAT8	LIGOWS|MOF|MYST1|ZC2HC8|hMOF	lysine acetyltransferase 8	protein-coding
11369	chr9	99819283	99820002	+	36	NA	intron (NR_109802, intron 1 of 6)	CpG	247	NR_109802	101928438		NR_109802	ENSG00000237461	LOC101928438	-	uncharacterized LOC101928438	ncRNA
9874	chr15	35506018	35506996	+	36	NA	intron (NM_080650, intron 3 of 8)	intron (NM_080650, intron 3 of 8)	39658	NM_080650	89978		NM_080650	ENSG00000134146	DPH6	ATPBD4	diphthamine biosynthesis 6	protein-coding
8489	chr10	79445679	79446374	+	36	NA	promoter-TSS (NM_153367)	promoter-TSS (NM_153367)	-402	NM_153367	219654		NM_153367	ENSG00000165424	ZCCHC24	C10orf56|Z3CXXC8	zinc finger CCHC-type containing 24	protein-coding
13945	chr20	9756163	9757342	+	36	NA	intron (NM_177990, intron 1 of 9)	MER33|DNA|hAT-Charlie	82324	NM_020341	57144		NM_020341	ENSG00000101349	PAK5	PAK7	p21 (RAC1) activated kinase 5	protein-coding
33796	chr5	34683792	34687657	+	36	NA	intron (NM_001145521, intron 2 of 18)	MIR3|SINE|MIR	1217	NM_001145525	26064		NM_015577	ENSG00000039560	RAI14	NORPEG|RAI13	retinoic acid induced 14	protein-coding
31824	chr6	138105444	138108349	+	36	NA	intron (NM_022121, intron 1 of 2)	intron (NM_022121, intron 1 of 2)	523	NM_022121	64065		NM_022121	ENSG00000112378	PERP	EKVP7|KCP1|KRTCAP1|OLMS2|PIGPC1|THW|dJ496H19.1	p53 apoptosis effector related to PMP22	protein-coding
21589	chr10	28498973	28501000	+	36	NA	Intergenic	Intergenic	-4173	NR_134496	105376468		NR_134496	ENSG00000237128	LINC02652	-	long intergenic non-protein coding RNA 2652	ncRNA
56609	chr4	49105030	49106553	+	36	NA	Intergenic	(CATTC)n|Satellite|Satellite	119149	NM_001286791	80157		NM_025087	ENSG00000109182	CWH43	CWH43-C|PGAP2IP	cell wall biogenesis 43 C-terminal homolog	protein-coding
18322	chr4	140726810	140728363	+	36	NA	intron (NM_015130, intron 1 of 20)	intron (NM_015130, intron 1 of 20)	28799	NM_015130	23158		NM_015130	ENSG00000109436	TBC1D9	GRAMD9|MDR1	TBC1 domain family member 9	protein-coding
10501	chr15	43105264	43106795	+	35	NA	promoter-TSS (NM_174916)	promoter-TSS (NM_174916)	9	NM_174916	197131		NM_174916	ENSG00000159459	UBR1	JBS	ubiquitin protein ligase E3 component n-recognin 1	protein-coding
14821	chr14	62691616	62693232	+	35	NA	Intergenic	Intergenic	353034	NM_172375	27133		NM_139318	ENSG00000140015	KCNH5	DEE112|EAG2|H-EAG2|Kv10.2|hEAG2	potassium voltage-gated channel subfamily H member 5	protein-coding
15430	chr5	69217671	69218506	+	35	NA	intron (NM_033281, intron 1 of 3)	CpG	328	NM_033281	92259		NM_033281	ENSG00000134056	KGD4	DC47|MRP-S36|MRPS36	alpha-ketoglutarate dehydrogenase subunit 4	protein-coding
21230	chr12	51849184	51850257	+	35	NA	intron (NR_135803, intron 1 of 2)	L2a|LINE|L2	-1002	NM_001384996	401720		NM_001013690	ENSG00000261308	FIGNL2	-	fidgetin like 2	protein-coding
17074	chr10	95260543	95261890	+	35	NA	intron (NM_020992, intron 4 of 6)	intron (NM_020992, intron 4 of 6)	29787	NM_020992	9124		NM_020992	ENSG00000107438	PDLIM1	CLIM1|CLP-36|CLP36|HEL-S-112|hCLIM1	PDZ and LIM domain 1	protein-coding
12652	chr10	95183140	95183911	+	35	NA	Intergenic	CpG	-10675	NM_207321	142827		NM_207321	ENSG00000173124	ACSM6	C10orf129|bA310E22.3	acyl-CoA synthetase medium chain family member 6	protein-coding
12439	chr17	39729900	39730876	+	35	NA	intron (NM_032339, intron 1 of 3)	CpG	144	NM_032339	84299		NM_032339	ENSG00000141741	MIEN1	C17orf37|C35|ORB3|RDX12|XTP4	migration and invasion enhancer 1	protein-coding
12205-2	chr14	70416400	70417171	+	35	NA	intron (NM_018373, intron 1 of 3)	intron (NM_018373, intron 1 of 3)	305	NM_001202549	100529257		NM_001202547	ENSG00000258644	SYNJ2BP-COX16	-	SYNJ2BP-COX16 readthrough	protein-coding
13301	chr7	37354284	37355183	+	35	NA	intron (NM_001206480, intron 1 of 21)	intron (NM_001206480, intron 1 of 21)	-1065	NM_001206482	9844		NM_014800	ENSG00000155849	ELMO1	CED-12|CED12|ELMO-1	engulfment and cell motility 1	protein-coding
18178	chr9	121975357	121977157	+	35	NA	intron (NM_001139442, intron 4 of 8)	L2b|LINE|L2	117051	NM_194252	158135		NM_194252	ENSG00000175764	TTLL11	C9orf148|C9orf20|TTLL11-IT1|bA244O19.1	tubulin tyrosine ligase like 11	protein-coding
13970	chr19	43575108	43576413	+	35	NA	promoter-TSS (NM_006297)	promoter-TSS (NM_006297)	-233	NM_006297	7515		NM_006297	ENSG00000073050	XRCC1	RCC|SCAR26	X-ray repair cross complementing 1	protein-coding
13624	chr17	26619458	26620305	+	35	NA	Intergenic	ALR/Alpha|Satellite|centr	469360	NR_135673	105371703		NR_135673		LOC105371703	-	uncharacterized LOC105371703	ncRNA
13443	chr1	113978888	113979691	+	35	NA	promoter-TSS (NM_001286352)	promoter-TSS (NM_001286352)	-102	NM_001286353	56944		NM_020190	ENSG00000116774	OLFML3	HNOEL-iso|OLF44	olfactomedin like 3	protein-coding
11573	chr20	35539693	35540424	+	35	NA	Intergenic	MER51E|LTR|ERV1	-2020	NM_015966	51614		NM_015966	ENSG00000125991	ERGIC3	C20orf47|C2orf47|CGI-54|Erv46|NY-BR-84|PRO0989|SDBCAG84|dJ477O4.2	ERGIC and golgi 3	protein-coding
10152	chr7	92041896	92042828	+	35	NA	intron (NM_147185, intron 19 of 49)	intron (NM_147185, intron 19 of 49)	-15216	NM_001379277	10142		NM_005751	ENSG00000127914	AKAP9	AKAP-9|AKAP350|AKAP450|CG-NAP|HYPERION|LQT11|MU-RMS-40.16A|PPP1R45|PRKA9|YOTIAO	A-kinase anchoring protein 9	protein-coding
38800	chr15	55784093	55785584	+	35	NA	Intergenic	AluSx|SINE|Alu	-41686	NM_173814	283659		NM_173814	ENSG00000166450	PRTG	IGDCC5	protogenin	protein-coding
15078	chr1	43471400	43473327	+	35	NA	Intergenic	ERVL-B4-int|LTR|ERVL	-18374	NM_001190880	81888		NM_031207	ENSG00000178922	HYI	HT036	hydroxypyruvate isomerase (putative)	protein-coding
10288	chr6	138572131	138573055	+	35	NA	promoter-TSS (NM_020464)	promoter-TSS (NM_020464)	-24	NM_020464	57224		NM_020464	ENSG00000135540	NHSL1	C6orf63	NHS like 1	protein-coding
15835	chr3	40397286	40398703	+	35	NA	intron (NR_040100, intron 3 of 3)	intron (NR_040100, intron 3 of 3)	10810	NM_001291961	956		NM_001248	ENSG00000168032	ENTPD3	CD39L3|HB6|NTPDase-3	ectonucleoside triphosphate diphosphohydrolase 3	protein-coding
30452	chr14	99564851	99565313	+	35	NA	intron (NM_001144995, intron 1 of 5)	intron (NM_001144995, intron 1 of 5)	39125	NM_001144995	317762		NM_022747	ENSG00000205476	CCDC85C	-	coiled-coil domain containing 85C	protein-coding
16295	chr2	134465285	134466692	+	34	NA	intron (NM_030923, intron 6 of 7)	intron (NM_030923, intron 6 of 7)	211916	NM_002410	4249		NM_002410	ENSG00000152127	MGAT5	GNT-V|GNT-VA|MGAT5A|glcNAc-T V	alpha-1,6-mannosylglycoprotein 6-beta-N-acetylglucosaminyltransferase	protein-coding
30916	chr20	11891257	11892963	+	34	NA	promoter-TSS (NM_001282550)	promoter-TSS (NM_001282550)	-383	NM_001282550	22903		NM_014962	ENSG00000132640	BTBD3	dJ742J24.1	BTB domain containing 3	protein-coding
24245	chr16	85013517	85015255	+	34	NA	Intergenic	LTR24B|LTR|ERV1	-2851	NM_017740	55625		NM_017740	ENSG00000153786	ZDHHC7	DHHC7|SERZ-B|SERZ1|ZNF370	zinc finger DHHC-type palmitoyltransferase 7	protein-coding
14954	chr3	148991157	148992729	+	34	NA	intron (NM_001184720, intron 1 of 6)	CpG	403	NM_004130	2992		NM_004130	ENSG00000163754	GYG1	GSD15|GYG	glycogenin 1	protein-coding
11825	chr5	1593889	1595058	+	34	NA	promoter-TSS (NR_003263)	promoter-TSS (NR_003263)	58	NR_003263	728609		NR_003263	ENSG00000291055	SDHAP3	SDHACL|SDHAL	SDHA pseudogene 3	pseudo
21747	chr17	69501223	69502735	+	34	NA	promoter-TSS (NM_001330450)	promoter-TSS (NM_001330450)	-283	NM_001330450	5608		NM_002758	ENSG00000108984	MAP2K6	MAPKK6|MEK6|MKK6|PRKMK6|SAPKK-3|SAPKK3	mitogen-activated protein kinase kinase 6	protein-coding
15598	chr1	91736774	91737792	+	34	NA	intron (NR_036634, intron 5 of 17)	intron (NR_036634, intron 5 of 17)	148868	NR_036634	7049		NM_003243	ENSG00000069702	TGFBR3	BGCAN|betaglycan	transforming growth factor beta receptor 3	protein-coding
12195	chr14	22956544	22957545	+	34	NA	promoter-TSS (NR_039856)	promoter-TSS (NR_039856)	-15	NR_039856	100616424		NR_039856	ENSG00000284118	MIR4707	mir-4707	microRNA 4707	ncRNA
18005	chr6	142376920	142379274	+	34	NA	intron (NM_001032394, intron 4 of 24)	intron (NM_001032394, intron 4 of 24)	76090	NM_198569	57211		NM_020455	ENSG00000112414	ADGRG6	APG1|DREG|GPR126|LCCS9|PR126|PS1TP2|VIGR	adhesion G protein-coupled receptor G6	protein-coding
11523	chrX	120629612	120630568	+	34	NA	promoter-TSS (NM_001011551)	promoter-TSS (NM_001011551)	-36	NM_001011551	29071		NM_152692	ENSG00000171155	C1GALT1C1	AHUS8|C1GALT2|C38H2-L1|COSMC|HSPC067|MST143|TNPS	C1GALT1 specific chaperone 1	protein-coding
11391	chr12	97568285	97569226	+	34	NA	Intergenic	Intergenic	4943	NR_029678	406926		NR_029678	ENSG00000207586	MIR135A2	MIRN135-2|MIRN135A2|mir-135a-2	microRNA 135a-2	ncRNA
20222	chr12	51371147	51372711	+	34	NA	intron (NM_007210, intron 4 of 11)	intron (NM_007210, intron 4 of 11)	-19388	NM_001258401	9498		NM_004858	ENSG00000050438	SLC4A8	NBC3|NDCBE	solute carrier family 4 member 8	protein-coding
10414	chr12	48851889	48852789	+	34	NA	promoter-TSS (NM_004818)	promoter-TSS (NM_004818)	-176	NM_004818	9416		NM_004818	ENSG00000174243	DDX23	PRPF28|SNRNP100|U5-100K|U5-100KD|prp28	DEAD-box helicase 23	protein-coding
11161	chr20	62066345	62067641	+	34	NA	Intergenic	Intergenic	-1183	NM_003185	6874		NM_003185	ENSG00000130699	TAF4	MRD73|TAF(II)130|TAF(II)135|TAF2C|TAF2C1|TAF4A|TAFII-130|TAFII-135|TAFII130|TAFII135	TATA-box binding protein associated factor 4	protein-coding
14348	chr2	226477912	226478964	+	34	NA	Intergenic	Intergenic	180355	NR_049887	100847053		NR_049887	ENSG00000263363	MIR5702	-	microRNA 5702	ncRNA
20297	chr3	56757938	56760213	+	34	NA	intron (NM_001289698, intron 3 of 10)	L1ME3G|LINE|L1	16642	NM_001377413	50650		NM_019555	ENSG00000163947	ARHGEF3	GEF3|STA3|XPLN	Rho guanine nucleotide exchange factor 3	protein-coding
14871-2	chr9	107247668	107249654	+	34	NA	Intergenic	Intergenic	-34618	NM_002874	5887		NM_002874	ENSG00000119318	RAD23B	HHR23B|HR23B|P58	RAD23 homolog B, nucleotide excision repair protein	protein-coding
24454	chr10	63521915	63522783	+	34	NA	promoter-TSS (NM_001318154)	promoter-TSS (NM_001318154)	-459	NM_001318154	221037		NM_004241	ENSG00000171988	JMJD1C	KDM3C|TRIP-8|TRIP8	jumonji domain containing 1C	protein-coding
14409	chr2	216057625	216058477	+	34	NA	intron (NM_018441, intron 4 of 7)	MLT1K|LTR|ERVL-MaLR	23758	NM_018441	55825		NM_018441	ENSG00000115425	PECR	DCRRP|HPDHASE|HSA250303|PVIARL|SDR29C1|TERP	peroxisomal trans-2-enoyl-CoA reductase	protein-coding
9649	chr10	97640092	97640793	+	34	NA	promoter-TSS (NM_018425)	promoter-TSS (NM_018425)	-244	NM_018425	55361		NM_018425	ENSG00000155252	PI4K2A	NEDMSB|PI4KII|PIK42A	phosphatidylinositol 4-kinase type 2 alpha	protein-coding
12775	chr2	32277583	32278419	+	34	NA	promoter-TSS (NM_032312)	promoter-TSS (NM_032312)	97	NM_032312	84272		NM_032312	ENSG00000119820	YIPF4	FinGER4|Nbla11189|YIPFalpha2	Yip1 domain family member 4	protein-coding
11660	chr9	124660157	124660875	+	34	NA	intron (NR_038975, intron 1 of 1)	intron (NR_038975, intron 1 of 1)	2080	NR_038975	100379345		NR_038975	ENSG00000224020	MIR181A2HG	-	MIR181A2 host gene	ncRNA
20209	chr1	84690431	84691438	+	34	NA	promoter-TSS (NM_014021)	promoter-TSS (NM_014021)	-466	NM_001166295	117178		NM_014021	ENSG00000117155	SSX2IP	ADIP|hMsd1	SSX family member 2 interacting protein	protein-coding
25457	chr13	24038251	24041412	+	34	NA	intron (NM_001286792, intron 3 of 14)	intron (NM_001286792, intron 3 of 14)	60029	NM_001286792	221178		NM_153023	ENSG00000182957	SPATA13	ARHGEF29|ASEF2	spermatogenesis associated 13	protein-coding
25864	chr21	33403556	33405791	+	34	NA	intron (NM_005534, intron 1 of 6)	AluJb|SINE|Alu	1260	NM_005534	3460		NM_005534	ENSG00000159128	IFNGR2	AF-1|IFGR2|IFNGT1|IMD28	interferon gamma receptor 2	protein-coding
17632	chr9	78235655	78236732	+	34	NA	5' UTR (NM_001330693, exon 1 of 16)	5' UTR (NM_001330693, exon 1 of 16)	118	NM_001330693	84131		NM_032171	ENSG00000148019	CEP78	C9orf81|CRDHL|IP63	centrosomal protein 78	protein-coding
28707	chr3	52453848	52454634	+	34	NA	promoter-TSS (NM_003280)	promoter-TSS (NM_003280)	-200	NM_003280	7134		NM_003280	ENSG00000114854	TNNC1	CMD1Z|CMH13|TN-C|TNC|TNNC	troponin C1, slow skeletal and cardiac type	protein-coding
14958-2	chr6	149647934	149649189	+	34	NA	5' UTR (NM_001204076, exon 1 of 8)	5' UTR (NM_001204076, exon 1 of 8)	153	NM_007044	11104		NM_007044	ENSG00000186625	KATNA1	-	katanin catalytic subunit A1	protein-coding
31043	chr19	1603494	1603598	+	34	NA	intron (NM_006830, intron 1 of 2)	AluY|SINE|Alu	1916	NM_006830	10975		NM_006830	ENSG00000127540	UQCR11	0710008D09Rik|QCR10|UQCR	ubiquinol-cytochrome c reductase, complex III subunit XI	protein-coding
17061	chr1	227787576	227789105	+	34	NA	promoter-TSS (NR_168384)	promoter-TSS (NR_168384)	-180	NR_168384	105373289		NR_168380	ENSG00000286389	LOC105373289	-	LOC105373289	ncRNA
14181-2	chr15	55661198	55662194	+	34	NA	intron (NM_173814, intron 11 of 19)	intron (NM_173814, intron 11 of 19)	-72725	NM_015617	26108		NM_015617	ENSG00000171016	PYGO1	-	pygopus family PHD finger 1	protein-coding
67179	chr4	123400830	123401221	+	34	NA	intron (NM_005841, intron 1 of 1)	intron (NM_005841, intron 1 of 1)	1485	NM_005841	10252		NM_005841	ENSG00000164056	SPRY1	hSPRY1	sprouty RTK signaling antagonist 1	protein-coding
13625	chr17	3893073	3893884	+	34	NA	promoter-TSS (NM_032294)	promoter-TSS (NM_032294)	-425	NM_032294	84254		NM_032294	ENSG00000004660	CAMKK1	CAMKKA	calcium/calmodulin dependent protein kinase kinase 1	protein-coding
13481-2	chr6	145199692	145200673	+	33	NA	Intergenic	Tigger3a|DNA|TcMar-Tigger	486695	NM_001368132	7957		NM_005670	ENSG00000112425	EPM2A	EPM2|MELF|MELF2	EPM2A glucan phosphatase, laforin	protein-coding
8133	chr1	67578472	67579156	+	33	NA	Intergenic	MIRb|SINE|MIR	-106387	NM_001199741	1647		NM_001924	ENSG00000116717	GADD45A	DDIT1|GADD45	growth arrest and DNA damage inducible alpha	protein-coding
17321	chr9	72129044	72130995	+	33	NA	intron (NM_001242507, intron 1 of 13)	intron (NM_001242507, intron 1 of 13)	15424	NM_001242507	9615		NM_004293	ENSG00000119125	GDA	CYPIN|GAH|GUANASE|NEDASIN	guanine deaminase	protein-coding
21298	chr7	106112029	106113081	+	33	NA	promoter-TSS (NM_001381911)	promoter-TSS (NM_001381911)	21	NM_001381913	6856		NM_006754	ENSG00000008282	SYPL1	H-SP1|SYPL	synaptophysin like 1	protein-coding
10785	chr7	35646596	35647880	+	33	NA	intron (NM_022373, intron 5 of 8)	L2c|LINE|L2	47897	NM_022373	64224		NM_022373	ENSG00000122557	HERPUD2	-	HERPUD family member 2	protein-coding
10749	chr14_GL000225v1_random	45823	47209	+	33	NA	NA	BSR/Beta|Satellite|Satellite	NA	NA
11741	chr6	161273812	161274708	+	33	NA	promoter-TSS (NM_020133)	promoter-TSS (NM_020133)	-199	NM_020133	56895		NM_020133	ENSG00000026652	AGPAT4	1-AGPAT4|LPAAT-delta|LPAAT4|LPLAT4|dJ473J16.2	1-acylglycerol-3-phosphate O-acyltransferase 4	protein-coding
20794	chr2	66698339	66700943	+	33	NA	intron (NR_110265, intron 2 of 2)	intron (NR_110265, intron 2 of 2)	3586	NR_110265	101927577		NR_110264	ENSG00000237179	LINC01797	-	long intergenic non-protein coding RNA 1797	ncRNA
9332-3	chrX	88837653	88838261	+	33	NA	Intergenic	LTR22|LTR|ERVK	90732	NM_033048	53336		NM_033048	ENSG00000147183	CPXCR1	CT77	CPX chromosome region candidate 1	protein-coding
11319	chrX	109536502	109537478	+	33	NA	promoter-TSS (NM_001242618)	promoter-TSS (NM_001242618)	146	NM_001242617	55916		NM_018698	ENSG00000101888	NXT2	P15-2	nuclear transport factor 2 like export factor 2	protein-coding
9003-2	chr22	38681725	38682234	+	33	NA	promoter-TSS (NM_020243)	promoter-TSS (NM_020243)	22	NM_020243	56993		NM_020243	ENSG00000100216	TOMM22	1C9-2|MST065|MSTP065|TOM22	translocase of outer mitochondrial membrane 22	protein-coding
29981	chr9	69519112	69521639	+	33	NA	intron (NM_001163, intron 1 of 12)	L1M5|LINE|L1	151996	NM_001163	320		NM_001163	ENSG00000107282	APBA1	D9S411E|LIN10|MINT1|X11|X11A|X11ALPHA	amyloid beta precursor protein binding family A member 1	protein-coding
7245	chr14	29584745	29585525	+	33	NA	intron (NM_001348390, intron 17 of 18)	intron (NM_001348390, intron 17 of 18)	341961	NM_001348390	5587		NM_002742	ENSG00000184304	PRKD1	CHDED|PKC-MU|PKCM|PKD|PRKCM	protein kinase D1	protein-coding
20024	chr1	143199941	143202896	+	33	NA	Intergenic	Intergenic	221174	NR_027354	645166		NR_027354	ENSG00000288905	LSP1P5	-	LSP1 pseudogene 5	pseudo
15820	chr1	228963523	228964978	+	33	NA	Intergenic	Intergenic	210551	NR_039659	100616234		NR_039659	ENSG00000283468	MIR4454	-	microRNA 4454	ncRNA
16261	chr16	88451961	88453138	+	33	NA	promoter-TSS (NM_153813)	promoter-TSS (NM_153813)	-731	NM_153813	161882		NM_153813	ENSG00000179588	ZFPM1	FOG|FOG1|ZC2HC11A|ZNF408|ZNF89A	zinc finger protein, FOG family member 1	protein-coding
17489	chr4	170088777	170090564	+	33	NA	exon (NM_182662, exon 2 of 14)	exon (NM_182662, exon 2 of 14)	286	NM_016228	51166		NM_016228	ENSG00000109576	AADAT	KAT2|KATII|KYAT2	aminoadipate aminotransferase	protein-coding
7954	chr1	241202364	241203073	+	33	NA	intron (NM_001374808, intron 2 of 18)	MER39B|LTR|ERV1	70446	NR_036069	100422856		NR_036069	ENSG00000265831	MIR3123	mir-3123	microRNA 3123	ncRNA
16576	chr19	12733056	12735105	+	33	NA	intron (NR_138095, intron 1 of 2)	intron (NR_138095, intron 1 of 2)	604	NM_024038	79002		NM_024038	ENSG00000123144	TRIR	C19orf43|TERCIR|fSAP18	telomerase RNA component interacting RNase	protein-coding
58468	chr1	229114612	229114753	+	33	NA	Intergenic	Intergenic	60119	NR_039659	100616234		NR_039659	ENSG00000283468	MIR4454	-	microRNA 4454	ncRNA
11921-2	chr7	35003008	35004326	+	33	NA	intron (NM_015283, intron 6 of 21)	intron (NM_015283, intron 6 of 21)	33818	NM_001366673	23333		NM_015283	ENSG00000173852	DPY19L1	-	dpy-19 like C-mannosyltransferase 1	protein-coding
25951	chr19	18279347	18280831	+	33	NA	3' UTR (NM_001286968, exon 1 of 1)	3' UTR (NM_001286968, exon 1 of 1)	1533	NM_005354	3727		NM_005354	ENSG00000130522	JUND	AP-1	JunD proto-oncogene, AP-1 transcription factor subunit	protein-coding
27404	chr3	112092482	112093536	+	33	NA	intron (NM_024616, intron 1 of 5)	intron (NM_024616, intron 1 of 5)	6620	NM_024616	79669		NM_024616	ENSG00000114529	C3orf52	HYPT15|TTMP	chromosome 3 open reading frame 52	protein-coding
19431	chr20	52191038	52192717	+	33	NA	promoter-TSS (NM_018197)	promoter-TSS (NM_018197)	-98	NM_022088	55734		NM_018197	ENSG00000020256	ZFP64	ZNF338	ZFP64 zinc finger protein	protein-coding
12712-2	chr9	96391146	96391943	+	33	NA	intron (NM_153695, intron 4 of 4)	intron (NM_153695, intron 4 of 4)	-7833	NM_007001	11046		NM_007001	ENSG00000130958	SLC35D2	HFRC1|SQV7L|UGTrel8|hfrc	solute carrier family 35 member D2	protein-coding
13123	chr2	62485571	62486871	+	33	NA	Intergenic	Intergenic	19974	NM_198276	200728		NM_198276	ENSG00000186889	TMEM17	-	transmembrane protein 17	protein-coding
31299	chr14	94580592	94583561	+	33	NA	intron (NM_000624, intron 2 of 5)	intron (NM_000624, intron 2 of 5)	650	NM_000624	5104		NM_000624	ENSG00000188488	SERPINA5	PAI-3|PAI3|PCI|PCI-B|PLANH3|PROCI	serpin family A member 5	protein-coding
14377	chrX	317849	318627	+	33	NA	promoter-TSS (NR_027231)	promoter-TSS (NR_027231)	581	NM_012227	8225		NM_012227	ENSG00000178605	GTPBP6	PGPL	GTP binding protein 6 (putative)	protein-coding
16043	chr12	46473277	46475026	+	33	NA	intron (NR_125380, intron 3 of 3)	intron (NR_125380, intron 3 of 3)	90044	NR_125381	100288798		NR_125377		SLC38A4-AS1	-	SLC38A4 antisense RNA 1	ncRNA
15148	chr5	69844664	69845380	+	33	NA	intron (NR_029426, intron 1 of 9).2	LTR12E|LTR|ERV1	210	NR_029426	11039		NM_006780		GUSBP14	SMA3|SMA4|b55C20.2	GUSB pseudogene 14	pseudo
11598-2	chr5	70719784	70720365	+	33	NA	intron (NR_146391, intron 1 of 10).3	LTR12E|LTR|ERV1	285	NR_146391	653080		NR_146391		GUSBP16	-	GUSB pseudogene 16	pseudo
15823	chr17	56965353	56966499	+	33	NA	Intergenic	LTR2|LTR|ERV1	-4876	NM_004645	8161		NM_004645	ENSG00000121058	COIL	CLN80|p80-coilin	coilin	protein-coding
9895	chr12	15910715	15911901	+	33	NA	promoter-TSS (NM_015954)	promoter-TSS (NM_015954)	-24	NM_015954	51071		NM_015954	ENSG00000023697	DERA	CGI-26|DEOC	deoxyribose-phosphate aldolase	protein-coding
16049	chr14_GL000225v1_random	107078	108748	+	33	NA	NA	BSR/Beta|Satellite|Satellite	NA	NA
10506	chr11	111691341	111692511	+	32	NA	intron (NM_015191, intron 4 of 14)	intron (NM_015191, intron 4 of 14)	74463	NM_001177563	5519		NM_002716	ENSG00000137713	PPP2R1B	PP2A-Abeta|PR65B	protein phosphatase 2 scaffold subunit Abeta	protein-coding
11977	chr1	8789320	8790350	+	32	NA	intron (NM_001042681, intron 1 of 22)	intron (NM_001042681, intron 1 of 22)	27805	NM_001042681	473		NM_012102	ENSG00000142599	RERE	ARG|ARP|ATN1L|DNB1|NEDBEH	arginine-glutamic acid dipeptide repeats	protein-coding
22540	chr8	30726481	30727799	+	32	NA	intron (NM_001195104, intron 1 of 10)	intron (NM_001195104, intron 1 of 10)	706	NM_000637	2936		NM_000637	ENSG00000104687	GSR	GR|GSRD|HEL-75|HEL-S-122m	glutathione-disulfide reductase	protein-coding
30734	chr9	123327523	123328465	+	32	NA	Intergenic	Intergenic	-28203	NM_173689	286204		NM_173689	ENSG00000148204	CRB2	FSGS9|VMCKD	crumbs cell polarity complex component 2	protein-coding
38304	chr4	183387886	183388484	+	32	NA	Intergenic	Intergenic	-56451	NM_017632	55602		NM_017632	ENSG00000168564	CDKN2AIP	CARF	CDKN2A interacting protein	protein-coding
18951	chr21	36989539	36990966	+	32	NA	promoter-TSS (NM_000411)	promoter-TSS (NM_000411)	-41	NM_001352515	3141		NM_000411	ENSG00000159267	HLCS	HCS	holocarboxylase synthetase	protein-coding
9136	chrX	40467969	40468965	+	32	NA	Intergenic	Intergenic	-112503	NM_005765	10159		NM_005765	ENSG00000182220	ATP6AP2	APT6M8-9|ATP6IP2|ATP6M8-9|CDG2R|ELDF10|HT028|M8-9|MRXE|MRXSH|MSTP009|PRR|RENR|XMRE|XPDS	ATPase H+ transporting accessory protein 2	protein-coding
21583-2	chr8	79889826	79892127	+	32	NA	Intergenic	Intergenic	-19239	NR_110954	101927040		NR_110954	ENSG00000249328	LOC101927040	-	uncharacterized LOC101927040	ncRNA
13731	chr10	60977685	60978968	+	32	NA	intron (NM_001350907, intron 2 of 12)	intron (NM_001350907, intron 2 of 12)	22671	NM_001350906	9886		NM_014836	ENSG00000072422	RHOBTB1	-	Rho related BTB domain containing 1	protein-coding
14233	chr9	83166185	83167012	+	32	NA	Intergenic	Intergenic	100670	NM_001375487	257019		NM_174938	ENSG00000172159	FRMD3	4.1O|EPB41L4O|EPB41LO|P410	FERM domain containing 3	protein-coding
15636	chr1	17438458	17439440	+	32	NA	promoter-TSS (NM_001136204)	promoter-TSS (NM_001136204)	-413	NM_001136204	55920		NM_018715	ENSG00000179051	RCC2	TD-60	regulator of chromosome condensation 2	protein-coding
10994	chr17_KI270857v1_alt	2834936	2835509	+	32	NA	promoter-TSS (NM_003559)	promoter-TSS (NM_003559)	2	NM_003559	8396		NM_003559	ENSG00000276293	PIP4K2B	PI5P4KB|PIP5K2B|PIP5KIIB|PIP5KIIbeta|PIP5P4KB	phosphatidylinositol-5-phosphate 4-kinase type 2 beta	protein-coding
20472	chr15	37105970	37108114	+	32	NA	Intergenic	Intergenic	-5731	NM_001220482	4212		NM_002399	ENSG00000134138	MEIS2	CPCMR|HsT18361|MRG1	Meis homeobox 2	protein-coding
20965	chr6	12545278	12545409	+	32	NA	Intergenic	Intergenic	40061	NR_149140	101928309		NR_149140	ENSG00000234015	LINC02530	-	long intergenic non-protein coding RNA 2530	ncRNA
14047	chr9	120928198	120929530	+	32	NA	intron (NM_001190945, intron 1 of 8)	CpG	309	NM_001190945	7185		NM_005658	ENSG00000056558	TRAF1	EBI6|MGC:10353	TNF receptor associated factor 1	protein-coding
17928	chr6	49506221	49507599	+	32	NA	intron (NM_001010904, intron 1 of 5)	HERVK11D-int|LTR|ERVK	6987	NM_001010904	389396		NM_001010904	ENSG00000203972	GLYATL3	C6orf140|bA28H17.2	glycine-N-acyltransferase like 3	protein-coding
25441	chr4	40513654	40517091	+	32	NA	promoter-TSS (NM_001371113)	promoter-TSS (NM_001371113)	613	NM_019027	54502		NM_019027	ENSG00000163694	RBM47	NET18	RNA binding motif protein 47	protein-coding
7807	chr4	129096084	129096416	+	32	NA	promoter-TSS (NM_001099783)	promoter-TSS (NM_001099783)	98	NM_001099783	132321		NM_173487	ENSG00000151470	C4orf33	-	chromosome 4 open reading frame 33	protein-coding
15142	chr15	63121797	63122943	+	32	NA	intron (NM_171846, intron 1 of 4)	CpG	509	NM_001288585	114294		NM_032857	ENSG00000103642	LACTB	G24|MRPL56	lactamase beta	protein-coding
9359	chr6	170552667	170553417	+	32	NA	intron (NM_002793, intron 1 of 5)	CpG	265	NM_002793	5689		NM_002793	ENSG00000008018	PSMB1	HC5|NEDMHAL|PMSB1|PSC5	proteasome 20S subunit beta 1	protein-coding
23670	chr7	37345807	37348401	+	32	NA	intron (NM_001206480, intron 1 of 21)	intron (NM_001206480, intron 1 of 21)	6564	NM_001206482	9844		NM_014800	ENSG00000155849	ELMO1	CED-12|CED12|ELMO-1	engulfment and cell motility 1	protein-coding
22907	chr17	15645061	15646797	+	32	NA	intron (NM_001348121, intron 3 of 7)	intron (NM_001348121, intron 3 of 7)	-26225	NM_001282540	374286		NM_006382	ENSG00000241322	FBXW10B	C170RF1|C17ORF1|C17ORF1A|CDRT1|FBXW10P1|HREP|SM25H2	F-box and WD repeat domain containing 10B	protein-coding
11577	chr8	125218935	125220302	+	32	NA	intron (NR_146191, intron 6 of 8)	intron (NR_146191, intron 6 of 8)	127758	NM_173685	286053		NM_173685	ENSG00000156831	NSMCE2	C8orf36|MMS21|NSE2|ZMIZ7	NSE2 (MMS21) homolog, SMC5-SMC6 complex SUMO ligase	protein-coding
10627	chr5	79990573	79991813	+	32	NA	promoter-TSS (NM_001306213)	promoter-TSS (NM_001306213)	69	NM_001010891	345778		NM_001010891	ENSG00000177034	MTX3	-	metaxin 3	protein-coding
19535	chr8	125985323	125987724	+	32	NA	Intergenic	L1M6|LINE|L1	-35326	NR_038447	100130231		NR_038446	ENSG00000245164	LINC00861	-	long intergenic non-protein coding RNA 861	ncRNA
7832	chr2	180983657	180984195	+	32	NA	intron (NM_001278554, intron 2 of 5)	intron (NM_001278554, intron 2 of 5)	2802	NM_001278554	10477		NM_006357	ENSG00000170035	UBE2E3	UBCH9|UbcM2	ubiquitin conjugating enzyme E2 E3	protein-coding
23110	chrX	13028570	13030837	+	32	NA	Intergenic	Intergenic	14917	NM_174901	171484		NM_174901	ENSG00000187268	FAM9C	TEX39C	family with sequence similarity 9 member C	protein-coding
8387	chr11	120391204	120391983	+	32	NA	intron (NM_001301084, intron 1 of 40)	intron (NM_001301084, intron 1 of 40)	6266	NM_001301084	23365		NM_015313	ENSG00000196914	ARHGEF12	LARG|PRO2792	Rho guanine nucleotide exchange factor 12	protein-coding
8229-2	chr2	178277598	178278303	+	32	NA	intron (NM_001201481, intron 1 of 23)	intron (NM_001201481, intron 1 of 23)	-42292	NM_145739	114880		NM_032523	ENSG00000079156	OSBPL6	ORP6	oxysterol binding protein like 6	protein-coding
11751	chr6	143677442	143678854	+	32	NA	5' UTR (NM_001100164, exon 1 of 13)	5' UTR (NM_001100164, exon 1 of 13)	183	NM_001100164	9749		NM_014721	ENSG00000112419	PHACTR2	C6orf56	phosphatase and actin regulator 2	protein-coding
12530	chr10	121302713	121304241	+	32	NA	Intergenic	MamRep434|DNA|TcMar-Tigger	227837	NM_001320654	2263		NM_000141	ENSG00000066468	FGFR2	BBDS|BEK|BFR-1|CD332|CEK3|CFD1|ECT1|JWS|K-SAM|KGFR|TK14|TK25	fibroblast growth factor receptor 2	protein-coding
10401-2	chr7	96709428	96710174	+	32	NA	promoter-TSS (NM_006304)	promoter-TSS (NM_006304)	45	NR_163951	7979		NM_006304	ENSG00000127922	SEM1	C7orf76|DSS1|ECD|PSMD15|SHFD1|SHFM1|SHSF1|Shfdg1	SEM1 26S proteasome subunit	protein-coding
14550	chr7	25951418	25953425	+	32	NA	Intergenic	Intergenic	-2435	NR_029597	406940		NR_029597	ENSG00000199085	MIR148A	MIRN148|MIRN148A|hsa-mir-148|mir-148a	microRNA 148a	ncRNA
36176	chr2	218258860	218259713	+	32	NA	promoter-TSS (NM_001321950)	promoter-TSS (NM_001321950)	-210	NM_001321950	151306		NM_170699	ENSG00000179921	GPBAR1	BG37|GPCR19|GPR131|M-BAR|TGR5	G protein-coupled bile acid receptor 1	protein-coding
16531	chr21	38171175	38172519	+	32	NA	Intergenic	Intergenic	-34309	NR_027695	259234		NM_148676	ENSG00000233316	DSCR10	-	Down syndrome critical region 10	ncRNA
27537	chr20	47350681	47351455	+	32	NA	intron (NM_001281772, intron 2 of 23)	intron (NM_001281772, intron 2 of 23)	681	NM_001363741	23613		NM_012408	ENSG00000101040	ZMYND8	PRKCBP1|PRO2893|RACK7	zinc finger MYND-type containing 8	protein-coding
9046	chr15	52651725	52652376	+	32	NA	promoter-TSS (NM_001286495)	promoter-TSS (NM_001286495)	-10	NR_169552	56204		NM_019600	ENSG00000047346	ATOSA	FAM214A|KIAA1370	atos homolog A	protein-coding
16497	chr11	118263270	118265254	+	31	NA	promoter-TSS (NM_005797)	promoter-TSS (NM_005797)	35	NM_005797	10205		NM_005797	ENSG00000149573	MPZL2	DFNB111|EVA|EVA1	myelin protein zero like 2	protein-coding
15771	chrX	18616889	18618315	+	31	NA	intron (NM_001323289, intron 15 of 17)	intron (NM_001323289, intron 15 of 17)	54506	NM_000330	6247		NM_000330	ENSG00000102104	RS1	RS|XLRS1	retinoschisin 1	protein-coding
24153	chr19	7919716	7922093	+	31	NA	promoter-TSS (NR_030717)	promoter-TSS (NR_030717)	-111	NR_030717	6618		NM_003083	ENSG00000104976	SNAPC2	PTFDELTA|SNAP45	small nuclear RNA activating complex polypeptide 2	protein-coding
8253-2	chr22	43015050	43015785	+	31	NA	promoter-TSS (NM_001349971)	promoter-TSS (NM_001349971)	-241	NM_001349974	11252		NM_007229	ENSG00000100266	PACSIN2	SDPII	protein kinase C and casein kinase substrate in neurons 2	protein-coding
10806-2	chr21	44869332	44870504	+	31	NA	intron (NM_004339, intron 1 of 5)	intron (NM_004339, intron 1 of 5)	3772	NM_004339	754		NM_004339	ENSG00000183255	PTTG1IP	C21orf1|C21orf3|PBF|PTTG1IP1	PTTG1 interacting protein	protein-coding
19364	chr8	102411594	102413195	+	31	NA	promoter-TSS (NR_168428)	promoter-TSS (NR_168428)	55	NR_168428	105375683		NR_168428		LOC105375683	-	uncharacterized LOC105375683	ncRNA
28310	chr10	68525384	68526362	+	31	NA	intron (NM_001324314, intron 1 of 9)	LTR5_Hs|LTR|ERVK	1650	NM_152707	8034		NM_152707	ENSG00000122912	SLC25A16	D10S105E|GDA|GDC|HGT.1|ML7|hGP|hML7	solute carrier family 25 member 16	protein-coding
13047	chr5	113513469	113514678	+	31	NA	exon (NM_022828, exon 1 of 30)	exon (NM_022828, exon 1 of 30)	379	NM_022828	64848		NM_022828	ENSG00000047188	YTHDC2	CAHL|hYTHDC2	YTH N6-methyladenosine RNA binding protein C2	protein-coding
13043	chr1	91015178	91016629	+	31	NA	intron (NM_032186, intron 1 of 3)	MIRb|SINE|MIR	5605	NM_016620	84146		NM_016620	ENSG00000122482	ZNF644	BM-005|MYP21|NatF|ZEP-2	zinc finger protein 644	protein-coding
19537	chr15	90233085	90234555	+	31	NA	promoter-TSS (NM_001322811)	promoter-TSS (NM_001322811)	121	NM_006384	10519		NM_006384	ENSG00000185043	CIB1	CIB|CIBP|EV3|KIP1|PRKDCIP|SIP2-28	calcium and integrin binding 1	protein-coding
9939	chr10	31603254	31604076	+	31	NA	Intergenic	CpG	-203910	NM_001368169	100505502		NM_001368169	ENSG00000285781	LOC100505502	-	POM121 transmembrane nucleoporin like, pseudogene	pseudo
12380	chr3	107845270	107846888	+	31	NA	intron (NR_024276, intron 5 of 7)	intron (NR_024276, intron 5 of 7)	31989	NR_024276	151658		NR_015414	ENSG00000241469	LINC00635	-	long intergenic non-protein coding RNA 635	ncRNA
13854	chrX	4709162	4711128	+	31	NA	Intergenic	LTR8|LTR|ERV1	-76573	NR_110390	101928201		NR_110390	ENSG00000236513	LOC101928201	-	uncharacterized LOC101928201	ncRNA
17995	chr7	6825267	6826828	+	31	NA	intron (NM_198097, intron 1 of 14)	CpG	228	NM_198097	221960		NM_198097	ENSG00000146574	CCZ1B	C7orf28A|C7orf28B|CCZ1|H_NH0577018.2	CCZ1 homolog B, vacuolar protein trafficking and biogenesis associated	protein-coding
15177	chr10	121042825	121044023	+	31	NA	Intergenic	Intergenic	192062	NM_018117	55717		NM_018117	ENSG00000120008	WDR11	BRWD2|DR11|HH14|SRI1|WDR15	WD repeat domain 11	protein-coding
13099	chr12	115423153	115424696	+	31	NA	Intergenic	Intergenic	724730	NR_030351	693205		NR_030351	ENSG00000207967	MIR620	MIRN620|hsa-mir-620	microRNA 620	ncRNA
9606	chr11	86580596	86581595	+	31	NA	intron (NR_147828, intron 2 of 14)	intron (NR_147828, intron 2 of 14)	91103	NR_147831	10873		NM_006680	ENSG00000151376	ME3	NADP-ME	malic enzyme 3	protein-coding
13156	chr5	18985151	18985968	+	31	NA	Intergenic	MER67B|LTR|ERV1	900713	NM_001291957	1016		NM_004934	ENSG00000145526	CDH18	CDH14|CDH14L|CDH24	cadherin 18	protein-coding
11346	chr11	31369474	31370228	+	31	NA	promoter-TSS (NM_181706)	promoter-TSS (NM_181706)	-9	NM_181706	120526		NM_181706	ENSG00000170946	DNAJC24	DPH4|JJJ3|ZCSL3	DnaJ heat shock protein family (Hsp40) member C24	protein-coding
8101	chr2	177725952	177726585	+	31	NA	intron (NM_001077358, intron 11 of 18)	intron (NM_001077358, intron 11 of 18)	52946	NR_136171	105373764		NR_136171	ENSG00000229941	PDE11A-AS1	-	PDE11A antisense RNA 1	ncRNA
20252	chr3	141231819	141232963	+	31	NA	intron (NM_001282728, intron 1 of 6)	CpG	566	NM_152282	92370		NM_152282	ENSG00000155893	PXYLP1	ACPL2|HEL124|XYLP	2-phosphoxylose phosphatase 1	protein-coding
14951	chr1	68197618	68200008	+	31	NA	intron (NM_024911, intron 1 of 11)	intron (NM_024911, intron 1 of 11)	-15203	NR_031664	100302279		NR_031664	ENSG00000221203	MIR1262	MIRN1262|hsa-mir-1262|mir-1262	microRNA 1262	ncRNA
10175	chr10	67764044	67764682	+	31	NA	Intergenic	CpG	-68168	NM_013266	29119		NM_013266	ENSG00000183230	CTNNA3	ARVD13|VR22	catenin alpha 3	protein-coding
17712	chr6	158610506	158612349	+	31	NA	intron (NR_164859, intron 10 of 16)	intron (NR_164859, intron 10 of 16)	1720	NR_106981	102465694		NR_106981	ENSG00000278571	MIR7161	hsa-mir-7161	microRNA 7161	ncRNA
11965	chr11	20027038	20028227	+	31	NA	intron (NM_001111019, intron 2 of 27)	intron (NM_001111019, intron 2 of 27)	5076	NM_001111019	89797		NM_145117	ENSG00000166833	NAV2	HELAD1|POMFIL2|RAINB1|STEERIN2|UNC53H2	neuron navigator 2	protein-coding
16194	chr15	57603912	57605106	+	31	NA	intron (NM_001018091, intron 2 of 12)	intron (NM_001018091, intron 2 of 12)	12605	NM_152451	100820829		NM_152451	ENSG00000263155	MYZAP	GCOM1|Gup|MYOZAP	myocardial zonula adherens protein	protein-coding
8311	chr16	3717509	3718282	+	31	NA	promoter-TSS (NM_001272049)	promoter-TSS (NM_001272049)	-371	NM_001272049	10131		NM_016292	ENSG00000126602	TRAP1	HSP 75|HSP75|HSP90L|TRAP-1	TNF receptor associated protein 1	protein-coding
14855	chr1	95068768	95070023	+	31	NA	intron (NM_144988, intron 1 of 3)	LTR24B|LTR|ERV1	3556	NM_144988	199857		NM_144988	ENSG00000172339	ALG14	CMS15|IDDEBF|MEPCA	ALG14 UDP-N-acetylglucosaminyltransferase subunit	protein-coding
12487-2	chrY	15926149	15927185	+	31	NA	Intergenic	LTR22|LTR|ERVK	-1122634	NR_046504	100874056		NR_046504	ENSG00000228787	NLGN4Y-AS1	NLGN4Y-AS|NLGN4YAS	NLGN4Y antisense RNA 1	ncRNA
13364	chr16	34594732	34595958	+	31	NA	Intergenic	Intergenic	-213865	NR_158158	102724928		NR_158158		CCNYL3	CCNYL1B	cyclin Y like 3 (pseudogene)	pseudo
14974	chr3	44554577	44556022	+	31	NA	5' UTR (NM_025169, exon 1 of 6)	5' UTR (NM_025169, exon 1 of 6)	106	NM_025169	55888		NM_018651	ENSG00000196345	ZKSCAN7	ZFP|ZNF167|ZNF448|ZNF64|ZSCAN39	zinc finger with KRAB and SCAN domains 7	protein-coding
13477	chr9	121648640	121650625	+	31	NA	intron (NM_032552, intron 1 of 16)	intron (NM_032552, intron 1 of 16)	82530	NM_032552	153090		NM_032552	ENSG00000136848	DAB2IP	AF9Q34|AIP-1|AIP1|DIP1/2	DAB2 interacting protein	protein-coding
35496	chr1	2134498	2136384	+	31	NA	intron (NR_146911, intron 2 of 15)	intron (NR_146911, intron 2 of 15)	30725	NM_001033582	5590		NM_002744	ENSG00000067606	PRKCZ	PKC-ZETA|PKC2	protein kinase C zeta	protein-coding
13075	chr2	11498310	11500041	+	31	NA	Intergenic	Intergenic	-32998	NM_001278277	1876		NM_198256	ENSG00000169016	E2F6	E2F-6	E2F transcription factor 6	protein-coding
20894	chr4	56908054	56909827	+	31	NA	promoter-TSS (NM_001193508)	promoter-TSS (NM_001193508)	27	NM_001193508	5978		NM_005612	ENSG00000084093	REST	DFNA27|GINGF5|HGF5|NRSF|WT6|XBR	RE1 silencing transcription factor	protein-coding
14564	chr21	42737504	42738905	+	31	NA	intron (NM_001001576, intron 3 of 14)	intron (NM_001001576, intron 3 of 14)	41790	NR_135517	101928311		NR_135517	ENSG00000283051	LINC01668	-	long intergenic non-protein coding RNA 1668	ncRNA
11511	chr3	84108272	84109224	+	31	NA	Intergenic	Intergenic	760827	NR_033860	440970		NR_033860	ENSG00000242641	LINC00971	-	long intergenic non-protein coding RNA 971	ncRNA
15514	chr20	36085265	36086579	+	31	NA	Intergenic	Intergenic	-5492	NM_001258331	2036		NM_012156	ENSG00000088367	EPB41L1	4.1N|MRD11	erythrocyte membrane protein band 4.1 like 1	protein-coding
17567	chr5	71289871	71290327	+	31	NA	promoter-TSS (NR_146391)	promoter-TSS (NR_146391)	-260	NR_146391	653080		NR_146391		GUSBP16	-	GUSB pseudogene 16	pseudo
6353-2	chr4	172900855	172901445	+	31	NA	intron (NM_001034845, intron 8 of 12)	intron (NM_001034845, intron 8 of 12)	-174272	NR_125894	101928314		NR_125894		GALNTL6-AS1	-	GALNTL6 antisense RNA 1	ncRNA
27809	chr5	145980937	145982976	+	31	NA	intron (NM_152550, intron 2 of 9)	intron (NM_152550, intron 2 of 9)	45378	NM_152550	153769		NM_152550	ENSG00000156463	SH3RF2	HEPP1|POSHER|PPP1R39|RNF158	SH3 domain containing ring finger 2	protein-coding
13936	chr5	57692738	57693907	+	31	NA	Intergenic	Intergenic	42662	NR_104668	101928505		NR_104668	ENSG00000287709	LOC101928505	-	uncharacterized LOC101928505	ncRNA
15103	chr5	30503771	30506063	+	31	NA	Intergenic	Intergenic	624357	NR_134264	105374704		NR_134264		LOC105374704	-	uncharacterized LOC105374704	ncRNA
24476	chr16	34572039	34574507	+	31	NA	Intergenic	(GAATG)n|Satellite|Satellite	-191793	NR_158158	102724928		NR_158158		CCNYL3	CCNYL1B	cyclin Y like 3 (pseudogene)	pseudo
18791	chr4	38318203	38320378	+	30	NA	Intergenic	Intergenic	-47624	NR_149123	105374410		NR_149123	ENSG00000248227	LINC02513	-	long intergenic non-protein coding RNA 2513	ncRNA
11790	chr18	32470738	32471703	+	30	NA	promoter-TSS (NM_001242409)	promoter-TSS (NM_001242409)	-338	NM_022751	64762		NM_022751	ENSG00000141441	GAREM1	C18orf11|FAM59A|GAREM|Gm944	GRB2 associated regulator of MAPK1 subtype 1	protein-coding
11901	chr15	66610854	66611949	+	30	NA	intron (NR_110372, intron 1 of 4)	intron (NR_110372, intron 1 of 4)	29211	NR_110372	102723165		NR_110372	ENSG00000259471	LINC01169	-	long intergenic non-protein coding RNA 1169	ncRNA
13205	chr3	177299535	177300964	+	30	NA	intron (NR_047465, intron 1 of 1)	intron (NR_047465, intron 1 of 1)	5807	NR_047465	100820709		NR_047465	ENSG00000203645	LINC00501	-	long intergenic non-protein coding RNA 501	ncRNA
15495	chr11	67373516	67375101	+	30	NA	promoter-TSS (NM_001166212)	promoter-TSS (NM_001166212)	-131	NM_001166212	23529		NM_013246	ENSG00000175505	CLCF1	BSF-3|BSF3|CISS2|CLC|NNT-1|NNT1|NR6	cardiotrophin like cytokine factor 1	protein-coding
11225	chr15	30990875	30991759	+	30	NA	intron (NM_017762, intron 1 of 15).2	CpG	311	NM_017762	54893		NM_017762	ENSG00000166912	MTMR10	-	myotubularin related protein 10	protein-coding
19355	chr9	94692378	94694697	+	30	NA	Intergenic	(ATAA)n|Simple_repeat|Simple_repeat	-33132	NM_032823	84909		NM_032823	ENSG00000148120	AOPEP	AP-O|APO|C90RF3|C9orf3|DYT31|ONPEP	aminopeptidase O (putative)	protein-coding
17453-2	chr3	76942172	76943959	+	30	NA	intron (NM_001378194, intron 1 of 27)	intron (NM_001378194, intron 1 of 27)	-97034	NM_001378193	6092		NM_002942	ENSG00000185008	ROBO2	SAX3	roundabout guidance receptor 2	protein-coding
8577	chr19	19033462	19034245	+	30	NA	promoter-TSS (NR_147913)	promoter-TSS (NR_147913)	-9	NM_001321697	10147		NM_014884	ENSG00000064607	SUGP2	SFRS14|SRFS14	SURP and G-patch domain containing 2	protein-coding
17100-2	chrUn_GL000216v2	162880	163765	+	30	NA	NA	BSR/Beta|Satellite|Satellite	NA	NA
12234	chr1	40531138	40532201	+	30	NA	promoter-TSS (NM_152373)	promoter-TSS (NM_152373)	32	NM_152373	127396		NM_152373	ENSG00000117010	ZNF684	-	zinc finger protein 684	protein-coding
15877	chr12	31589527	31590324	+	30	NA	promoter-TSS (NR_046909)	promoter-TSS (NR_046909)	2	NR_046909	100874249		NR_046909	ENSG00000255867	DENND5B-AS1	-	DENND5B antisense RNA 1	ncRNA
16830	chr6	19804420	19805709	+	30	NA	promoter-TSS (NR_134651)	promoter-TSS (NR_134651)	-305	NR_134650	100506885		NR_134649	ENSG00000228412	LNC-LBCS	LBCS	lncRNA bladder and prostate cancer suppressor, hnRNPK interacting	ncRNA
10308	chr8	42391454	42392725	+	30	NA	intron (NM_005662, intron 1 of 9)	CpG	209	NM_005662	7419		NM_005662	ENSG00000078668	VDAC3	HD-VDAC3|VDAC-3	voltage dependent anion channel 3	protein-coding
9227-2	chr4	89299184	89299931	+	30	NA	intron (NM_198281, intron 1 of 1)	intron (NM_198281, intron 1 of 1)	8243	NM_198281	285513		NM_198281	ENSG00000185477	GPRIN3	GRIN3	GPRIN family member 3	protein-coding
12412	chr9	107243339	107244408	+	30	NA	Intergenic	Intergenic	-39406	NM_002874	5887		NM_002874	ENSG00000119318	RAD23B	HHR23B|HR23B|P58	RAD23 homolog B, nucleotide excision repair protein	protein-coding
8104-2	chr5	65914542	65915144	+	30	NA	Intergenic	MIR|SINE|MIR	-11711	NM_001006600	55914		NM_018695	ENSG00000112851	ERBIN	ERBB2IP|HEL-S-78|LAP2	erbb2 interacting protein	protein-coding
10351	chr1	1231326	1232252	+	30	NA	promoter-TSS (NM_080605)	promoter-TSS (NM_080605)	212	NM_016547	51150		NM_016176	ENSG00000078808	SDF4	Cab45|SDF-4	stromal cell derived factor 4	protein-coding
8415-2	chr19	39539890	39540541	+	30	NA	promoter-TSS (NM_153232)	promoter-TSS (NM_153232)	-54	NM_153232	163126		NM_153232	ENSG00000176396	EID2	CRI2|EID-2	EP300 interacting inhibitor of differentiation 2	protein-coding
9114-2	chr7	140403534	140404419	+	30	NA	promoter-TSS (NM_001008749)	promoter-TSS (NM_001008749)	-82	NM_001008749	401409		NM_001008749	ENSG00000146955	RAB19	RAB19B	RAB19, member RAS oncogene family	protein-coding
8824	chr4	155426359	155427360	+	30	NA	Intergenic	Intergenic	-49894	NM_001039580	79884		NM_024826	ENSG00000164114	MAP9	ASAP	microtubule associated protein 9	protein-coding
13287	chr3	89577471	89578686	+	30	NA	Intergenic	Intergenic	470457	NM_182644	2042		NM_005233	ENSG00000044524	EPHA3	EK4|ETK|ETK1|HEK|HEK4|TYRO4	EPH receptor A3	protein-coding
19470	chr20	36104710	36106729	+	30	NA	intron (NM_001258329, intron 1 of 22)	intron (NM_001258329, intron 1 of 22)	13009	NM_001258330	2036		NM_012156	ENSG00000088367	EPB41L1	4.1N|MRD11	erythrocyte membrane protein band 4.1 like 1	protein-coding
12965	chr6	104859306	104860403	+	30	NA	promoter-TSS (NM_001350554)	promoter-TSS (NM_001350554)	65	NR_146790	57531		NM_020771	ENSG00000085382	HACE1	SPPRS	HECT domain and ankyrin repeat containing E3 ubiquitin protein ligase 1	protein-coding
19949	chr6	2764276	2766097	+	30	NA	promoter-TSS (NM_130395)	promoter-TSS (NM_130395)	-207	NM_130395	56897		NM_020135	ENSG00000124535	WRNIP1	CFAP93|FAP93|WHIP|bA420G6.2	WRN helicase interacting protein 1	protein-coding
8990	chr12	62934872	62935543	+	30	NA	promoter-TSS (NM_020700)	promoter-TSS (NM_020700)	-57	NM_020700	57460		NM_020700	ENSG00000111110	PPM1H	ARHCL1|NERPP-2C|URCC2	protein phosphatase, Mg2+/Mn2+ dependent 1H	protein-coding
14751	chr1	108962352	108964119	+	30	NA	intron (NM_001377467, intron 1 of 12)	CpG	249	NM_015127	23155		NM_015127	ENSG00000121940	CLCC1	MCLC|RP32	chloride channel CLIC like 1	protein-coding
25540	chr8	43139577	43141655	+	30	NA	intron (NM_001363228, intron 1 of 15)	CpG	152	NM_001363228	138050		NM_025070	ENSG00000165102	HGSNAT	HGNAT|MPS3C|RP73|TMEM76	heparan-alpha-glucosaminide N-acetyltransferase	protein-coding
17646	chr6	21952188	21952517	+	30	NA	intron (NR_015410, intron 5 of 11)	intron (NR_015410, intron 5 of 11)	194841	NR_034143	729177		NR_034143		NBAT1	CASC14|NBAT-1	neuroblastoma associated transcript 1	ncRNA
22786	chr10	102462172	102463620	+	30	NA	intron (NM_024789, intron 1 of 9)	intron (NM_024789, intron 1 of 9)	1501	NM_024789	79847		NM_024789	ENSG00000138111	MFSD13A	C10orf77|TMEM180|bA18I14.8	major facilitator superfamily domain containing 13A	protein-coding
13428	chr19	44908539	44909320	+	30	NA	exon (NM_001302691, exon 4 of 4)	exon (NM_001302691, exon 4 of 4)	2528	NM_001302690	348		NM_000041	ENSG00000130203	APOE	AD2|APO-E|ApoE4|LDLCQ5|LPG	apolipoprotein E	protein-coding
17100-3	chrUn_GL000216v2	164094	165234	+	30	NA	NA	BSR/Beta|Satellite|Satellite	NA	NA
8780	chr6	46129544	46130308	+	30	NA	promoter-TSS (NM_014936)	promoter-TSS (NM_014936)	-63	NM_014936	22875		NM_014936	ENSG00000001561	ENPP4	NPP4	ectonucleotide pyrophosphatase/phosphodiesterase 4	protein-coding
14034	chr19	14505384	14506299	+	30	NA	Intergenic	Intergenic	-9692	NM_202494	10755		NM_005716	ENSG00000123159	GIPC1	C19orf3|GIPC|GLUT1CBP|Hs.6454|IIP-1|NIP|OPDM2|RGS19IP1|SEMCAP|SYNECTIIN|SYNECTIN|TIP-2	GIPC PDZ domain containing family member 1	protein-coding
38265	chr14	104689918	104691196	+	30	NA	intron (NM_032714, intron 1 of 4)	intron (NM_032714, intron 1 of 4)	939	NM_022489	64423		NM_022489	ENSG00000203485	INF2	C14orf151|C14orf173|CMTDIE|FSGS5|pp9484	inverted formin 2	protein-coding
9454	chr5	141557510	141558447	+	30	NA	promoter-TSS (NR_038333)	promoter-TSS (NR_038333)	-333	NR_038333	100505658		NR_038333	ENSG00000246422	DIAPH1-AS1	-	DIAPH1 antisense RNA 1	ncRNA
19080	chr5_KI270897v1_alt	49320	50060	+	30	NA	intron (NR_029426, intron 1 of 9).6	LTR12E|LTR|ERV1	214	NR_029426	11039		NM_006780		GUSBP14	SMA3|SMA4|b55C20.2	GUSB pseudogene 14	pseudo
10520-2	chr3	50327648	50329104	+	30	NA	promoter-TSS (NM_007275)	promoter-TSS (NM_007275)	-138	NM_007275	11334		NM_007275	ENSG00000114383	TUSC2	C3orf11|FUS1|PAP|PDAP2	tumor suppressor 2, mitochondrial calcium regulator	protein-coding
20269	chr15	74540393	74541139	+	30	NA	promoter-TSS (NM_001307939)	promoter-TSS (NM_001307939)	-411	NM_001307939	10620		NM_006465	ENSG00000179361	ARID3B	BDP|DRIL2	AT-rich interaction domain 3B	protein-coding
9188	chr1	224438630	224439695	+	30	NA	intron (NM_001322303, intron 1 of 5)	intron (NM_001322303, intron 1 of 5)	4313	NR_136291	149111		NM_152495	ENSG00000143786	CNIH3	CNIH-3	cornichon family AMPA receptor auxiliary protein 3	protein-coding
8088	chr3	99911359	99911894	+	30	NA	intron (NM_182909, intron 4 of 5)	L2c|LINE|L2	-35423	NM_014890	11259		NM_014890	ENSG00000168386	FILIP1L	DOC-1|DOC1|GIP130|GIP90	filamin A interacting protein 1 like	protein-coding
13633	chrX	108396179	108397104	+	30	NA	intron (NM_033641, intron 2 of 44)	intron (NM_033641, intron 2 of 44)	41781	NM_033641	1288		NM_001847	ENSG00000197565	COL4A6	CXDELq22.3|DELXq22.3|DFNX6	collagen type IV alpha 6 chain	protein-coding
39138	chr6	39204581	39206427	+	30	NA	intron (NM_003740, intron 1 of 4)	intron (NM_003740, intron 1 of 4)	23971	NM_003740	8645		NM_003740	ENSG00000164626	KCNK5	K2p5.1|KCNK5b|TASK-2|TASK2	potassium two pore domain channel subfamily K member 5	protein-coding
10188	chr7	7696450	7697198	+	30	NA	intron (NM_002947, intron 2 of 7)	(T)n|Simple_repeat|Simple_repeat	21783	NM_002947	6119		NM_002947	ENSG00000106399	RPA3	REPA3|RP-A p14	replication protein A3	protein-coding
13728	chr20	48983258	48984388	+	30	NA	intron (NM_006420, intron 14 of 38)	intron (NM_006420, intron 14 of 38)	62112	NM_006420	10564		NM_006420	ENSG00000124198	ARFGEF2	BIG2|PVNH2|dJ1164I10.1	ADP ribosylation factor guanine nucleotide exchange factor 2	protein-coding
27793	chr11	71252534	71254846	+	30	NA	Intergenic	Intergenic	-1113	NM_012309	22941		NM_012309	ENSG00000162105	SHANK2	AUTS17|CORTBP1|CTTNBP1|ProSAP1|SHANK|SPANK-3	SH3 and multiple ankyrin repeat domains 2	protein-coding
36042	chr6	108561381	108561691	+	30	NA	exon (NM_001455, exon 1 of 3)	exon (NM_001455, exon 1 of 3)	619	NM_001455	2309		NM_001455	ENSG00000118689	FOXO3	AF6q21|FKHRL1|FKHRL1P2|FOXO2|FOXO3A	forkhead box O3	protein-coding
11346-2	chr5	64165814	64166653	+	30	NA	intron (NM_178532, intron 1 of 4)	CpG	390	NM_178532	285671		NM_178532	ENSG00000164197	RNF180	RINES	ring finger protein 180	protein-coding
9993	chr2	166134013	166135209	+	30	NA	intron (NR_110260, intron 2 of 11)	intron (NR_110260, intron 2 of 11)	-6591	NM_001353954	6323		NM_006920	ENSG00000144285	SCN1A	DEE6|DEE6A|DEE6B|DRVT|EIEE6|FEB3|FEB3A|FHM3|GEFSP2|HBSCI|NAC1|Nav1.1|SCN1|SMEI	sodium voltage-gated channel alpha subunit 1	protein-coding
28043	chr4	78137667	78139196	+	30	NA	intron (NM_025074, intron 2 of 73)	intron (NM_025074, intron 2 of 73)	80861	NM_001166133	80144		NM_020875	ENSG00000138759	FRAS1	FRASRS1	Fraser extracellular matrix complex subunit 1	protein-coding
12141-2	chr6	34953191	34954602	+	30	NA	intron (NM_015245, intron 1 of 23)	intron (NM_015245, intron 1 of 23)	64641	NM_015245	23294		NM_015245	ENSG00000064999	ANKS1A	ANKS1	ankyrin repeat and sterile alpha motif domain containing 1A	protein-coding
11890	chr1	151007725	151009022	+	30	NA	promoter-TSS (NM_001303242)	promoter-TSS (NM_001303242)	20	NM_018379	55793		NM_018379	ENSG00000143409	MINDY1	FAM63A|MINDY-1	MINDY lysine 48 deubiquitinase 1	protein-coding
25609	chr4	49138981	49140191	+	30	NA	Intergenic	(TCCAT)n|Simple_repeat|Simple_repeat	152944	NM_001286791	80157		NM_025087	ENSG00000109182	CWH43	CWH43-C|PGAP2IP	cell wall biogenesis 43 C-terminal homolog	protein-coding
13644	chr10	91220587	91221593	+	29	NA	intron (NM_032373, intron 1 of 9)	CpG	427	NM_032373	84333		NM_032373	ENSG00000180628	PCGF5	RNF159	polycomb group ring finger 5	protein-coding
11239	chr19	47599958	47601157	+	29	NA	Intergenic	CpG	-7639	NM_015711	29998		NM_015711	ENSG00000063169	BICRA	CSS12|GLTSCR1|SMARCK1	BRD4 interacting chromatin remodeling complex associated protein	protein-coding
10411	chr8	79959988	79960800	+	29	NA	intron (NM_014018, intron 2 of 2)	intron (NM_014018, intron 2 of 2)	69865	NM_014018	28957		NM_014018	ENSG00000147586	MRPS28	COXPD47|HSPC007|MRP-S28|MRP-S35|MRPS35	mitochondrial ribosomal protein S28	protein-coding
18672	chr4	47913807	47915170	+	29	NA	promoter-TSS (NM_001278624)	promoter-TSS (NM_001278624)	95	NM_001278624	152518		NM_152995	ENSG00000170448	NFXL1	CDZFP|HOZFP|OZFP|URCC5	nuclear transcription factor, X-box binding like 1	protein-coding
45787	chr14	104681078	104681945	+	29	NA	Intergenic	Intergenic	-3762	NR_039860	100616300		NR_039860	ENSG00000265291	MIR4710	mir-4710	microRNA 4710	ncRNA
22431	chr3	171678634	171681699	+	29	NA	intron (NM_001130081, intron 15 of 25)	intron (NM_001130081, intron 15 of 25)	130317	NM_001130081	5337		NM_002662	ENSG00000075651	PLD1	CVDD|CVDP1	phospholipase D1	protein-coding
28780	chr19	11383887	11384812	+	29	NA	promoter-TSS (NR_033663)	promoter-TSS (NR_033663)	-35	NR_033663	2057		NM_000121	ENSG00000187266	EPOR	EPO-R	erythropoietin receptor	protein-coding
12844	chr3	186566770	186568150	+	29	NA	promoter-TSS (NM_018138)	promoter-TSS (NM_018138)	-121	NM_018138	55171		NM_018138	ENSG00000113838	TBCCD1	-	TBCC domain containing 1	protein-coding
18173	chr20	408079	409260	+	29	NA	non-coding (NR_136659, exon 1 of 12)	non-coding (NR_136659, exon 1 of 12)	370	NM_001323958	10616		NM_006462	ENSG00000125826	RBCK1	C20orf18|HOIL-1|HOIL1|PBMEI|PGBM1|RBCK2|RNF54|UBCE7IP3|XAP3|XAP4|ZRANB4	RANBP2-type and C3HC4-type zinc finger containing 1	protein-coding
15789	chr2	117726447	117728225	+	29	NA	Intergenic	MIR|SINE|MIR	-87355	NM_006773	8886		NM_006773	ENSG00000088205	DDX18	Has1|MrDb	DEAD-box helicase 18	protein-coding
13273	chr10	45672618	45673859	+	29	NA	promoter-TSS (NR_104256)	promoter-TSS (NR_104256)	-425	NM_001282906	93550		NM_174890	ENSG00000172671	ZFAND4	ANUBL1	zinc finger AN1-type containing 4	protein-coding
10486	chr13	59414562	59416217	+	29	NA	Intergenic	Intergenic	-597329	NR_046539	100874195		NR_046539	ENSG00000227528	DIAPH3-AS1	-	DIAPH3 antisense RNA 1	ncRNA
10898	chr2	105398450	105399136	+	29	NA	intron (NM_001374399, intron 1 of 6)	CpG	258	NM_001318896	2274		NM_001450	ENSG00000115641	FHL2	AAG11|DRAL|FHL-2|SLIM-3|SLIM3	four and a half LIM domains 2	protein-coding
13264	chr2	95164975	95166228	+	29	NA	promoter-TSS (NM_021088)	promoter-TSS (NM_021088)	-208	NM_001282398	7549		NM_021088	ENSG00000275111	ZNF2	A1-5|ZNF661|Zfp661	zinc finger protein 2	protein-coding
37536	chr17	72568882	72573508	+	29	NA	intron (NR_036488, intron 1 of 3)	AluSq2|SINE|Alu	21609	NR_137280	100499467		NR_036488	ENSG00000227036	LINC00673	ERRLR01|HI-LNC75|HILNC75|LUCAIR1|RASON|SLNCR|SLNCR1	long intergenic non-protein coding RNA 673	ncRNA
12095	chr6	4084385	4085258	+	29	NA	intron (NR_104464, intron 1 of 5)	intron (NR_104464, intron 1 of 5)	5612	NR_104464	404220		NM_206834	ENSG00000293447	TEX56P	C6orf201|dJ1013A10.5	testis expressed 56, pseudogene	pseudo
29503	chr3	160398955	160401009	+	29	NA	promoter-TSS (NM_020800)	promoter-TSS (NM_020800)	332	NM_001002800	10051		NM_005496	ENSG00000113810	SMC4	CAP-C|CAPC|SMC-4|SMC4L1	structural maintenance of chromosomes 4	protein-coding
11122	chr4	186688087	186689169	+	29	NA	intron (NM_005245, intron 2 of 26)	intron (NM_005245, intron 2 of 26)	35228	NM_005245	2195		NM_005245	ENSG00000083857	FAT1	CDHF7|CDHR8|FAT|ME5|hFat1	FAT atypical cadherin 1	protein-coding
33414	chr21	31873717	31875895	+	29	NA	intron (NM_014586, intron 1 of 10)	intron (NM_014586, intron 1 of 10)	1786	NM_014586	30811		NM_014586	ENSG00000142149	HUNK	-	hormonally up-regulated Neu-associated kinase	protein-coding
21894	chr2	215435426	215437460	+	29	NA	promoter-TSS (NM_212476)	promoter-TSS (NM_212476)	-375	NM_001365523	2335		NM_002026	ENSG00000115414	FN1	CIG|ED-B|FINC|FN|FNZ|GFND|GFND2|LETS|MSF|SMDCF	fibronectin 1	protein-coding
21699	chr2	221792533	221795270	+	29	NA	Intergenic	Intergenic	-219699	NM_001304536	2043		NM_004438	ENSG00000116106	EPHA4	EK8|HEK8|SEK|TYRO1	EPH receptor A4	protein-coding
12754	chr1	146191457	146192544	+	29	NA	intron (NM_203458, intron 1 of 4)	intron (NM_203458, intron 1 of 4)	37032	NM_001364006	388677		NM_203458	ENSG00000264343	NOTCH2NLA	N2N|NOTCH2NL	notch 2 N-terminal like A	protein-coding
9900	chr3	10025949	10026759	+	29	NA	promoter-TSS (NR_002786)	promoter-TSS (NR_002786)	-83	NM_001018115	2177		NM_033084	ENSG00000144554	FANCD2	FA-D2|FA4|FACD|FAD|FAD2|FANCD	FA complementation group D2	protein-coding
16971	chr12	53252066	53252767	+	29	NA	intron (NM_032889, intron 1 of 1)	intron (NM_032889, intron 1 of 1)	321	NM_032889	84975		NM_032889	ENSG00000182544	MFSD5	SLC61A1|hsMOT2	major facilitator superfamily domain containing 5	protein-coding
14201	chr2	11483009	11484030	+	29	NA	Intergenic	Intergenic	-17342	NM_001278277	1876		NM_198256	ENSG00000169016	E2F6	E2F-6	E2F transcription factor 6	protein-coding
14243	chr4	76548012	76549098	+	29	NA	intron (NM_020859, intron 1 of 10)	intron (NM_020859, intron 1 of 10)	-25013	NR_039654	100616299		NR_039654	ENSG00000263445	MIR4450	mir-4450	microRNA 4450	ncRNA
10618	chr3	100334145	100334888	+	29	NA	promoter-TSS (NM_020202)	promoter-TSS (NM_020202)	-241	NM_020202	56954		NM_020202	ENSG00000114021	NIT2	HEL-S-8a	nitrilase family member 2	protein-coding
8214	chr15	82513255	82514344	+	29	NA	non-coding (NR_026811, exon 1 of 8)	non-coding (NR_026811, exon 1 of 8)	196	NR_102747	727751		NR_102747		LOC727751	-	golgin A2 pseudogene	pseudo
21428	chr11	75582964	75584780	+	29	NA	intron (NR_145823, intron 1 of 1)	intron (NR_145823, intron 1 of 1)	676	NR_145823	105369391		NR_145823	ENSG00000255326	LOC105369391	-	uncharacterized LOC105369391	ncRNA
19785	chr14	67532809	67534326	+	29	NA	intron (NM_020715, intron 1 of 28)	CpG	142	NM_001348547	161145		NM_182526	ENSG00000198133	TMEM229B	C14orf83	transmembrane protein 229B	protein-coding
7934-2	chr7	55964643	55965413	+	29	NA	intron (NM_001202469, intron 1 of 7)	CpG	443	NM_001483	2631		NM_001483	ENSG00000146729	NIPSNAP2	GBAS	nipsnap homolog 2	protein-coding
14200	chr1	21117210	21118755	+	29	NA	intron (NM_001198803, intron 1 of 12)	intron (NM_001198803, intron 1 of 12)	-6599	NM_003760	8672		NM_003760	ENSG00000075151	EIF4G3	eIF-4G 3|eIF4G 3|eIF4GII	eukaryotic translation initiation factor 4 gamma 3	protein-coding
10294-3	chr3	173397534	173398389	+	29	NA	5' UTR (NM_001365926, exon 1 of 7)	5' UTR (NM_001365926, exon 1 of 7)	217	NM_001365935	22871		NM_014932	ENSG00000169760	NLGN1	NL1|NLG1	neuroligin 1	protein-coding
10278	chr12	58812013	58812541	+	29	NA	intron (NR_126341, intron 1 of 1)	intron (NR_126341, intron 1 of 1)	-30561	NR_120452	101927653		NR_120452	ENSG00000257259	LINC02388	-	long intergenic non-protein coding RNA 2388	ncRNA
9139-2	chr4	49633648	49634898	+	29	NA	Intergenic	(GAATG)n|Satellite|Satellite	647631	NM_001286791	80157		NM_025087	ENSG00000109182	CWH43	CWH43-C|PGAP2IP	cell wall biogenesis 43 C-terminal homolog	protein-coding
15114	chr18	62523685	62525141	+	29	NA	intron (NM_017742, intron 1 of 13)	CpG	1388	NM_017742	54877		NM_017742	ENSG00000141664	ZCCHC2	C18orf49	zinc finger CCHC-type containing 2	protein-coding
13648	chr13	23620626	23622151	+	29	NA	intron (NM_148957, intron 4 of 9)	MamRTE1|LINE|RTE-BovB	42028	NM_001354985	55504		NM_018647	ENSG00000127863	TNFRSF19	TAJ|TAJ-alpha|TRADE|TROY	TNF receptor superfamily member 19	protein-coding
13135	chr9	113540701	113542247	+	29	NA	3' UTR (NM_017790, exon 18 of 18)	3' UTR (NM_017790, exon 18 of 18)	4863	NM_001276260	5998		NM_017790	ENSG00000138835	RGS3	C2PA|RGP3	regulator of G protein signaling 3	protein-coding
28824	chr9	129459455	129461646	+	29	NA	Intergenic	CpG	-28110	NR_038955	100506190		NR_038955		LINC00963	MetaLnc9	long intergenic non-protein coding RNA 963	ncRNA
32903	chr13	91140209	91143702	+	29	NA	intron (NR_047004, intron 2 of 3)	L4_A_Mam|LINE|RTE-X	-52338	NR_104057	101930747		NR_104057		LINC00380	-	long intergenic non-protein coding RNA 380	ncRNA
18604	chr2	183037102	183038422	+	29	NA	intron (NM_205842, intron 1 of 31)	CpG	695	NM_013436	10787		NM_013436	ENSG00000061676	NCKAP1	HEM2|NAP1|NAP125|p125Nap1	NCK associated protein 1	protein-coding
7519	chr12	92702769	92703314	+	29	NA	promoter-TSS (NM_001377329)	promoter-TSS (NM_001377329)	52	NM_001377329	440107		NM_001004330	ENSG00000187510	PLEKHG7	C12orf74	pleckstrin homology and RhoGEF domain containing G7	protein-coding
17427	chr10	84327987	84328863	+	29	NA	promoter-TSS (NM_001351292)	promoter-TSS (NM_001351292)	-164	NM_018999	54462		NM_018999	ENSG00000107771	CCSER2	FAM190B|Gcap14|KIAA1128|bA486O22.1	coiled-coil serine rich protein 2	protein-coding
18533	chr3	15309443	15311365	+	29	NA	intron (NM_001018009, intron 2 of 8)	intron (NM_001018009, intron 2 of 8)	22182	NM_004844	9467		NM_004844	ENSG00000131370	SH3BP5	SAB|SH3BP-5	SH3 domain binding protein 5	protein-coding
19266	chr17	57662417	57664034	+	29	NA	intron (NM_138962, intron 11 of 13)	intron (NM_138962, intron 11 of 13)	-54813	NR_110807	101927539		NR_110807	ENSG00000263499	LOC101927539	-	uncharacterized LOC101927539	ncRNA
13464	chr7	129102208	129103577	+	29	NA	Intergenic	Intergenic	-23379	NR_002144	407835		NR_002144		LOC407835	-	mitogen-activated protein kinase kinase 2 pseudogene	pseudo
17769	chr19	45729455	45731351	+	29	NA	intron (NM_001329633, intron 1 of 1)	intron (NM_001329633, intron 1 of 1)	493	NM_001080469	23403		NM_001080469	ENSG00000177051	FBXO46	20D7-FC4|FBXO34L|Fbx46	F-box protein 46	protein-coding
11606-3	chr6	104228385	104229761	+	29	NA	Intergenic	MLT1O|LTR|ERVL-MaLR	630473	NM_001321084	57531		NM_020771	ENSG00000085382	HACE1	SPPRS	HECT domain and ankyrin repeat containing E3 ubiquitin protein ligase 1	protein-coding
16810	chr1	158018827	158020454	+	29	NA	intron (NM_001286349, intron 1 of 12)	intron (NM_001286349, intron 1 of 12)	-5910	NR_145471	100505785		NR_145471		KIRREL1-IT1	KIRREL-IT1	KIRREL1 intronic transcript 1	ncRNA
21184	chr11	120335461	120337630	+	29	NA	5' UTR (NM_001198665, exon 1 of 40)	5' UTR (NM_001198665, exon 1 of 40)	132	NM_001198665	23365		NM_015313	ENSG00000196914	ARHGEF12	LARG|PRO2792	Rho guanine nucleotide exchange factor 12	protein-coding
28015	chr16	29708873	29711117	+	29	NA	Intergenic	LTR10D|LTR|ERV1	30815	NR_134536	23475		NM_014298	ENSG00000103485	QPRT	HEL-S-90n|QPRTase	quinolinate phosphoribosyltransferase	protein-coding
10297	chr1	15846668	15847868	+	29	NA	promoter-TSS (NM_015001)	promoter-TSS (NM_015001)	-439	NM_015001	23013		NM_015001	ENSG00000065526	SPEN	HIAA0929|MINT|RATARS|RBM15C|SHARP	spen family transcriptional repressor	protein-coding
32464	chr18	77086916	77088577	+	29	NA	intron (NM_001025100, intron 2 of 3)	CpG	45037	NM_001025101	4155		NM_002385	ENSG00000197971	MBP	-	myelin basic protein	protein-coding
15119	chr3	32780417	32781767	+	29	NA	Intergenic	CpG	-36905	NM_001039111	131405		NM_001039111	ENSG00000206557	TRIM71	HYC4|HYDCC1|LIN-41|LIN41	tripartite motif containing 71	protein-coding
13306	chr17	81833225	81834429	+	29	NA	promoter-TSS (NM_001288798)	promoter-TSS (NM_001288798)	-536	NM_001288799	348262		NM_207368	ENSG00000225663	MCRIP1	FAM195B|GRAN2|MCRIP	MAPK regulated corepressor interacting protein 1	protein-coding
22972	chr9	120713378	120714170	+	29	NA	exon (NM_001080497, exon 1 of 6)	exon (NM_001080497, exon 1 of 6)	696	NM_001080497	1955		NM_001080497	ENSG00000106780	MEGF9	EGFL5	multiple EGF like domains 9	protein-coding
11095	chr7	75738425	75740184	+	29	NA	promoter-TSS (NM_005338)	promoter-TSS (NM_005338)	-363	NM_005338	3092		NM_005338	ENSG00000127946	HIP1	HIP-I|ILWEQ|SHON|SHONbeta|SHONgamma	huntingtin interacting protein 1	protein-coding
13274	chr1	51784711	51786111	+	29	NA	intron (NM_024586, intron 20 of 23)	intron (NM_024586, intron 20 of 23)	50991	NR_031580	100313892		NR_031580	ENSG00000283899	MIR761	hsa-mir-761	microRNA 761	ncRNA
16025	chr1	236794885	236796362	+	29	NA	5' UTR (NM_001291940, exon 1 of 32)	5' UTR (NM_001291940, exon 1 of 32)	331	NM_000254	4548		NM_000254	ENSG00000116984	MTR	HMAG|MS|cblG	5-methyltetrahydrofolate-homocysteine methyltransferase	protein-coding
14883	chr3	152620575	152622416	+	29	NA	Intergenic	Intergenic	-213636	NM_002563	5028		NM_002563	ENSG00000169860	P2RY1	P2Y1|SARCC	purinergic receptor P2Y1	protein-coding
12137	chr3	196278798	196280410	+	29	NA	intron (NM_001312673, intron 1 of 8)	intron (NM_001312673, intron 1 of 8)	8122	NM_001312673	5130		NM_005017	ENSG00000161217	PCYT1A	CCTA|CCTalpha|CGL5|CT|CTA|CTPCT|PCYT1|SMDCRD	phosphate cytidylyltransferase 1A, choline	protein-coding
17218	chr15	90664811	90666114	+	29	NA	TTS (NR_120371)	TTS (NR_120371)	5228	NR_120371	101929765		NR_120371	ENSG00000245479	LINC01585	-	long intergenic non-protein coding RNA 1585	ncRNA
9401	chr4	107358574	107359340	+	29	NA	Intergenic	Intergenic	-322644	NM_014421	27123		NM_014421	ENSG00000155011	DKK2	DKK-2	dickkopf WNT signaling pathway inhibitor 2	protein-coding
12077	chr1	183185726	183186470	+	29	NA	promoter-TSS (NM_018891)	promoter-TSS (NM_018891)	-166	NM_018891	3918		NM_005562	ENSG00000058085	LAMC2	B2T|BM600|CSF|EBR2|EBR2A|JEB3A|JEB3B|LAMB2T|LAMNB2	laminin subunit gamma 2	protein-coding
9581	chr7	122679292	122679929	+	29	NA	intron (NM_017954, intron 2 of 29)	MER11B|LTR|ERVK	19507	NM_139175	168433		NM_139175	ENSG00000188050	RNF133	-	ring finger protein 133	protein-coding
12613	chr2	45330708	45331540	+	29	NA	Intergenic	Intergenic	-76183	NR_033831	400952		NR_033831	ENSG00000205054	LINC01121	UNQ6975	long intergenic non-protein coding RNA 1121	ncRNA
14878	chr22	49917588	49918722	+	29	NA	promoter-TSS (NM_024324)	promoter-TSS (NM_024324)	283	NM_024105	79087		NM_024105	ENSG00000182858	ALG12	CDG1G|ECM39|PP14673|hALG12	ALG12 alpha-1,6-mannosyltransferase	protein-coding
16216	chr9	92973829	92975057	+	29	NA	promoter-TSS (NM_033086)	promoter-TSS (NM_033086)	7	NM_033086	89846		NM_033086	ENSG00000127084	FGD3	ZFYVE5	FYVE, RhoGEF and PH domain containing 3	protein-coding
7356	chr21	28884946	28885521	+	29	NA	exon (NM_013240, exon 1 of 6)	exon (NM_013240, exon 1 of 6)	134	NM_013240	29104		NM_013240	ENSG00000156239	N6AMT1	C21orf127|HEMK2|KMT9|MTQ2|N6AMT|PRED28|PrmC|m.HsaHemK2P	N-6 adenine-specific DNA methyltransferase 1	protein-coding
39830	chr3	47382721	47387379	+	29	NA	intron (NM_001304482, intron 1 of 23)	AluSp|SINE|Alu	4029	NM_015466	25930		NM_015466	ENSG00000076201	PTPN23	HD-PTP|HDPTP|NEDBASS|PTP-TD14	protein tyrosine phosphatase non-receptor type 23	protein-coding
10449-2	chr5	38556796	38557543	+	29	NA	promoter-TSS (NM_001127671)	promoter-TSS (NM_001127671)	298	NM_001364298	3977		NM_002310	ENSG00000113594	LIFR	CD118|LIF-R|SJS2|STWS|SWS	LIF receptor subunit alpha	protein-coding
26105	chr17	82269798	82270244	+	28	NA	intron (NM_139062, intron 1 of 9)	intron (NM_139062, intron 1 of 9)	3679	NM_001363749	1453		NM_001893	ENSG00000141551	CSNK1D	ASPS|CKI-delta|CKId|CKIdelta|FASPS2|HCKID	casein kinase 1 delta	protein-coding
11201	chr14	40954199	40955278	+	28	NA	promoter-TSS (NR_109757)	promoter-TSS (NR_109757)	27	NR_109758	644919		NR_109757		LINC02315	-	long intergenic non-protein coding RNA 2315	ncRNA
12651	chr13	21061025	21061996	+	28	NA	promoter-TSS (NM_014572)	promoter-TSS (NM_014572)	76	NM_014572	26524		NM_014572	ENSG00000150457	LATS2	KPM	large tumor suppressor kinase 2	protein-coding
73391	chr22_KI270733v1_random	137842	139115	+	28	NA	Intergenic	(CT)n|Simple_repeat|Simple_repeat	8274	NR_145822	106632264		NR_145822		RNA28SN1	RNA28S4	RNA, 28S ribosomal N1	rRNA
10244	chr15	29924514	29925429	+	28	NA	intron (NM_001355012, intron 2 of 28).3	intron (NM_001355012, intron 2 of 28).3	44078	NM_001355012	7082		NM_003257	ENSG00000104067	TJP1	ZO-1	tight junction protein 1	protein-coding
11594	chr14_GL000225v1_random	100849	102566	+	28	NA	NA	BSR/Beta|Satellite|Satellite	NA	NA
13441	chr3	14943087	14944015	+	28	NA	non-coding (NR_046255, exon 2 of 2)	non-coding (NR_046255, exon 2 of 2)	3954	NR_046254	100505641		NR_046251	ENSG00000225733	FGD5-AS1	-	FGD5 antisense RNA 1	ncRNA
10504	chr1	166838845	166839605	+	28	NA	promoter-TSS (NM_017542)	promoter-TSS (NM_017542)	-250	NM_017542	57645		NM_017542	ENSG00000143157	POGK	BASS2|KRBOX2|LST003	pogo transposable element derived with KRAB domain	protein-coding
20258	chr3	141080588	141082546	+	28	NA	intron (NM_080862, intron 2 of 2)	intron (NM_080862, intron 2 of 2)	30220	NM_080862	92369		NM_080862	ENSG00000175093	SPSB4	SSB-4|SSB4	splA/ryanodine receptor domain and SOCS box containing 4	protein-coding
27056	chr17	81701979	81704357	+	28	NA	promoter-TSS (NM_002949)	promoter-TSS (NM_002949)	-199	NM_002949	6182		NM_002949	ENSG00000262814	MRPL12	5c5-2|L12mt|MRP-L31/34|MRPL7|MRPL7/L12|RPML12|bL12m	mitochondrial ribosomal protein L12	protein-coding
16720	chr19	1102588	1103281	+	28	NA	Intergenic	Intergenic	-1060	NM_002085	2879		NM_002085	ENSG00000167468	GPX4	GPx-4|GSHPx-4|MCSP|PHGPx|SMDS|snGPx|snPHGPx	glutathione peroxidase 4	protein-coding
10639	chr1	219993381	219994365	+	28	NA	intron (NM_004446, intron 18 of 31)	intron (NM_004446, intron 18 of 31)	-34775	NM_001376929	55532		NM_018713	ENSG00000196660	SLC30A10	HMDPC|HMNDYT1|ZNT10|ZNT8|ZRC1|ZnT-10	solute carrier family 30 member 10	protein-coding
13847	chr5	82594722	82595891	+	28	NA	Intergenic	LTR16E2|LTR|ERVL	-244849	NR_039773	100616297		NR_039773	ENSG00000283359	MIR3977	-	microRNA 3977	ncRNA
12625	chr16	74997863	74999069	+	28	NA	promoter-TSS (NM_032268)	promoter-TSS (NM_032268)	-558	NM_032268	84937		NM_032268	ENSG00000186187	ZNRF1	NIN283	zinc and ring finger 1	protein-coding
43881	chr1	3356405	3357384	+	28	NA	intron (NM_199454, intron 3 of 16)	intron (NM_199454, intron 3 of 16)	-97771	NM_014448	27237		NM_014448	ENSG00000130762	ARHGEF16	GEF16|NBR	Rho guanine nucleotide exchange factor 16	protein-coding
8646	chr1	219991210	219992453	+	28	NA	intron (NM_004446, intron 18 of 31)	intron (NM_004446, intron 18 of 31)	-32733	NM_001376929	55532		NM_018713	ENSG00000196660	SLC30A10	HMDPC|HMNDYT1|ZNT10|ZNT8|ZRC1|ZnT-10	solute carrier family 30 member 10	protein-coding
13180	chr5	152643925	152645159	+	28	NA	intron (NR_109877, intron 4 of 4)	intron (NR_109877, intron 4 of 4)	-239263	NM_020167	56923		NM_020167	ENSG00000132911	NMUR2	FM-4|FM4|NMU-R2|NMU2R|TGR-1|TGR1	neuromedin U receptor 2	protein-coding
9773	chr2	73926591	73927449	+	28	NA	non-coding (NR_134895, exon 1 of 3)	non-coding (NR_134895, exon 1 of 3)	140	NM_080918	1716		NM_001929	ENSG00000114956	DGUOK	MTDPS3|NCPH|NCPH1|PEOB4|dGK	deoxyguanosine kinase	protein-coding
10449	chr1	61076563	61077408	+	28	NA	promoter-TSS (NM_001145511)	promoter-TSS (NM_001145511)	-242	NM_001145511	4774		NM_005595	ENSG00000162599	NFIA	BRMUTD|C1DELp32p31|CTF|DEL1P32P31|NF-I/A|NF1-A|NFI-A|NFI-L	nuclear factor I A	protein-coding
10029	chr11	57656871	57658152	+	28	NA	promoter-TSS (NM_001142597)	promoter-TSS (NM_001142597)	-233	NM_001142597	10978		NM_006831	ENSG00000172409	CLP1	HEAB|hClp1	cleavage factor polyribonucleotide kinase subunit 1	protein-coding
18193	chr3	141401746	141403244	+	28	NA	promoter-TSS (NM_001376190)	promoter-TSS (NM_001376190)	146	NM_001376186	253461		NM_152535	ENSG00000177311	ZBTB38	CIBZ|PPP1R171|ZNF921	zinc finger and BTB domain containing 38	protein-coding
9152	chr3	149221746	149222565	+	28	NA	promoter-TSS (NM_000096)	promoter-TSS (NM_000096)	-326	NM_000096	1356		NM_000096	ENSG00000047457	CP	AB073614|CP-2	ceruloplasmin	protein-coding
10043-2	chr7	43926432	43927083	+	28	NA	promoter-TSS (NM_001290076)	promoter-TSS (NM_001290076)	321	NM_015983	51619		NM_015983	ENSG00000078967	UBE2D4	HBUCE1	ubiquitin conjugating enzyme E2 D4 (putative)	protein-coding
16930	chr1	59556367	59557706	+	28	NA	intron (NM_001244714, intron 6 of 13)	intron (NM_001244714, intron 6 of 13)	41406	NM_001278224	55277		NM_018291	ENSG00000172456	FGGY	-	FGGY carbohydrate kinase domain containing	protein-coding
13536	chr2	113198472	113199598	+	28	NA	intron (NM_012455, intron 15 of 16)	CpG	25064	NM_012455	23550		NM_012455	ENSG00000125637	PSD4	EFA6B|TIC	pleckstrin and Sec7 domain containing 4	protein-coding
14331	chr13	24419332	24420607	+	28	NA	TTS (NM_006437)	TTS (NM_006437)	88519	NR_131903	100861547		NR_131903	ENSG00000261498	LINC00566	-	long intergenic non-protein coding RNA 566	ncRNA
13168	chr5	124888013	124889863	+	28	NA	Intergenic	Intergenic	-140114	NM_001385619	57507		NM_020747	ENSG00000168916	ZNF608	NY-REN-36	zinc finger protein 608	protein-coding
20609	chr11	75351785	75352624	+	28	NA	promoter-TSS (NM_004041)	promoter-TSS (NM_004041)	-543	NM_004041	408		NM_004041	ENSG00000137486	ARRB1	ARB1|ARR1	arrestin beta 1	protein-coding
13367	chr17	37675605	37677600	+	28	NA	Intergenic	Intergenic	-33156	NM_001291476	11056		NM_007010	ENSG00000278053	DDX52	HUSSY19|ROK1	DExD-box helicase 52	protein-coding
13106	chr9	33076080	33077050	+	28	NA	intron (NM_018225, intron 1 of 11)	CpG	109	NM_018225	55234		NM_018225	ENSG00000122692	SMU1	BWD|SMU-1|fSAP57	SMU1 DNA replication regulator and spliceosomal factor	protein-coding
12257	chr1	24018263	24019472	+	28	NA	Intergenic	Intergenic	-38540	NM_001191009	10772		NM_006625	ENSG00000188529	SRSF10	FUSIP1|FUSIP2|NSSR|PPP1R149|SFRS13|SFRS13A|SRp38|SRrp40|TASR|TASR1|TASR2	serine and arginine rich splicing factor 10	protein-coding
35063	chr20	1469207	1470666	+	28	NA	Intergenic	Intergenic	-2244	NM_018839	55968		NM_016143	ENSG00000088833	NSFL1C	P47|UBX1|UBXD10|UBXN2C|dJ776F14.1	NSFL1 cofactor	protein-coding
17006-2	chr6	47634784	47635691	+	28	NA	Intergenic	Harlequin-int|LTR|ERV1	-21235	NM_153839	222611		NM_153839		ADGRF2	GPR111|PGR20|hGPCR35	adhesion G protein-coupled receptor F2	ncRNA
15438	chr19	48720435	48721244	+	28	NA	exon (NM_017805, exon 12 of 12)	exon (NM_017805, exon 12 of 12)	-1114	NM_001130915	284358		NM_182574	ENSG00000176909	MAMSTR	MASTR	MEF2 activating motif and SAP domain containing transcriptional regulator	protein-coding
9184	chr4	91934951	91935771	+	28	NA	Intergenic	LTR22C0|LTR|ERVK	341941	NR_125920	101929194		NR_125920		LNCPRESS2	-	lncRNA p53 regulated and ESC associated 2	ncRNA
10988-2	chr9	78143126	78143967	+	28	NA	Intergenic	LTR71B|LTR|ERV1	-92529	NM_001098802	84131		NM_032171	ENSG00000148019	CEP78	C9orf81|CRDHL|IP63	centrosomal protein 78	protein-coding
12810	chr1	204313689	204314972	+	28	NA	intron (NM_014935, intron 1 of 22)	intron (NM_014935, intron 1 of 22)	45599	NM_014935	22874		NM_014935	ENSG00000143850	PLEKHA6	PEPP-3|PEPP3	pleckstrin homology domain containing A6	protein-coding
37895	chr2	201123405	201127836	+	28	NA	intron (NR_147255, intron 1 of 4)	intron (NR_147255, intron 1 of 4)	-3345	NM_001308042	8837		NM_003879	ENSG00000003402	CFLAR	CASH|CASP8AP1|CLARP|Casper|FLAME|FLAME-1|FLAME1|FLIP|I-FLICE|MRIT|c-FLIP|c-FLIPL|c-FLIPR|c-FLIPS|cFLIP	CASP8 and FADD like apoptosis regulator	protein-coding
10334	chr1	21439716	21440464	+	28	NA	promoter-TSS (NM_001377493)	promoter-TSS (NM_001377493)	-47	NM_001377491	84224		NM_032264	ENSG00000142794	NBPF3	AE2	NBPF member 3	protein-coding
13682	chr1	63908680	63909669	+	28	NA	intron (NM_001083592, intron 1 of 6)	intron (NM_001083592, intron 1 of 6)	135157	NM_001083592	4919		NM_005012	ENSG00000185483	ROR1	NTRKR1|dJ537F10.1	receptor tyrosine kinase like orphan receptor 1	protein-coding
9145-2	chr21	42975255	42975958	+	28	NA	intron (NM_001320694, intron 1 of 10)	CpG	1044	NM_001320694	5316		NM_004571	ENSG00000160199	PKNOX1	PREP1|pkonx1c	PBX/knotted 1 homeobox 1	protein-coding
26938	chr17	67245268	67246779	+	28	NA	promoter-TSS (NM_014877)	promoter-TSS (NM_014877)	-827	NM_014877	9931		NM_014877	ENSG00000198265	HELZ	DHRC|DRHC|HUMORF5	helicase with zinc finger	protein-coding
19523	chr21	26116369	26118451	+	28	NA	intron (NM_001136131, intron 1 of 15)	intron (NM_001136131, intron 1 of 15)	22980	NM_001136016	351		NM_000484	ENSG00000142192	APP	AAA|ABETA|ABPP|AD1|APPI|CTFgamma|CVAP|PN-II|PN2|alpha-sAPP|preA4	amyloid beta precursor protein	protein-coding
14685	chr16	69761534	69762399	+	28	NA	promoter-TSS (NM_001270454)	promoter-TSS (NM_001270454)	-366	NM_001270455	11060		NM_007014	ENSG00000198373	WWP2	AIP2|WWp2-like	WW domain containing E3 ubiquitin protein ligase 2	protein-coding
13238	chr3	47898586	47900504	+	28	NA	intron (NM_001384835, intron 5 of 12)	intron (NM_001384835, intron 5 of 12)	49990	NR_031595	100302232		NR_031595	ENSG00000221585	MIR1226	MIRN1226|hsa-mir-1226|mir-1226	microRNA 1226	ncRNA
22549	chr17	68455955	68457530	+	28	NA	intron (NR_135470, intron 1 of 12)	intron (NR_135470, intron 1 of 12)	754	NM_017983	55062		NM_017983	ENSG00000070540	WIPI1	ATG18|ATG18A|WIPI49	WD repeat domain, phosphoinositide interacting 1	protein-coding
12826	chr1	198161715	198162676	+	28	NA	intron (NM_133494, intron 1 of 9)	intron (NM_133494, intron 1 of 9)	5197	NM_133494	140609		NM_133494	ENSG00000151414	NEK7	-	NIMA related kinase 7	protein-coding
14876	chr22	21629107	21630394	+	28	NA	exon (NM_001017964, exon 2 of 5)	exon (NM_001017964, exon 2 of 5)	272	NM_001371350	150223		NM_001017964	ENSG00000161179	YDJC	-	YdjC chitooligosaccharide deacetylase homolog	protein-coding
7650-2	chr2	241636007	241636745	+	28	NA	intron (NM_015963, intron 1 of 5)	CpG	782	NM_015963	51078		NM_015963	ENSG00000176946	THAP4	CGI-36|Nb(III)|PP238	THAP domain containing 4	protein-coding
12725-2	chr15	40952672	40953874	+	28	NA	promoter-TSS (NM_024111)	promoter-TSS (NM_024111)	-198	NM_024111	79094		NM_024111	ENSG00000128965	CHAC1	-	ChaC glutathione specific gamma-glutamylcyclotransferase 1	protein-coding
16775	chr16	58683929	58685394	+	28	NA	promoter-TSS (NM_001308384)	promoter-TSS (NM_001308384)	109	NM_001369609	55238		NM_018231	ENSG00000103042	SLC38A7	SNAT7	solute carrier family 38 member 7	protein-coding
14834	chr9	115372715	115373918	+	28	NA	intron (NR_163556, intron 4 of 7)	FLAM_C|SINE|Alu	231498	NR_163556	50514		NM_017418	ENSG00000173077	DELEC1	CTS9|DEC1	deleted in esophageal cancer 1	ncRNA
9661	chr6	17987812	17988918	+	28	NA	promoter-TSS (NM_001105566)	promoter-TSS (NM_001105566)	-730	NM_001243423	63971		NM_022113	ENSG00000137177	KIF13A	RBKIN|bA500C11.2	kinesin family member 13A	protein-coding
10197	chr5	103561785	103562826	+	28	NA	intron (NM_031438, intron 1 of 6)	intron (NM_031438, intron 1 of 6)	484	NM_031438	83594		NM_031438	ENSG00000112874	NUDT12	-	nudix hydrolase 12	protein-coding
17179	chr12	42756059	42758269	+	28	NA	Intergenic	Intergenic	64948	NR_135028	105369739		NR_135028	ENSG00000257114	LINC02450	-	long intergenic non-protein coding RNA 2450	ncRNA
10390	chr6	140537243	140538666	+	28	NA	Intergenic	Intergenic	-145860	NR_039675	100616180		NR_039675	ENSG00000264390	MIR4465	-	microRNA 4465	ncRNA
11194	chr16	69820821	69821838	+	28	NA	intron (NM_001270455, intron 4 of 8)	intron (NM_001270455, intron 4 of 8)	-17408	NM_001270453	11060		NM_007014	ENSG00000198373	WWP2	AIP2|WWp2-like	WW domain containing E3 ubiquitin protein ligase 2	protein-coding
16165	chr18	50967383	50968802	+	28	NA	promoter-TSS (NM_018696)	promoter-TSS (NM_018696)	52	NM_018696	55520		NM_018696	ENSG00000141642	ELAC1	D29	elaC ribonuclease Z 1	protein-coding
11834	chr12	56526743	56527591	+	28	NA	intron (NM_002898, intron 1 of 13)	intron (NM_002898, intron 1 of 13)	5347	NM_002898	5939		NM_002898	ENSG00000076067	RBMS2	SCR3	RNA binding motif single stranded interacting protein 2	protein-coding
21062	chr5	136132136	136134041	+	28	NA	intron (NM_001001420, intron 1 of 6)	CpG	243	NM_005903	4090		NM_005903	ENSG00000113658	SMAD5	DWFC|JV5-1|MADH5	SMAD family member 5	protein-coding
12323	chr13	50240583	50242038	+	28	NA	intron (NR_109974, intron 2 of 6)	Tigger17a|DNA|TcMar-Tigger	69292	NR_002183	145165		NM_153290		ST13P4	FAM10A4|FAM10A4P	ST13, Hsp70 interacting protein pseudogene 4	pseudo
10351-2	chr10	112949365	112950540	+	28	NA	promoter-TSS (NM_001198528)	promoter-TSS (NM_001198528)	-295	NM_001198531	6934		NM_030756	ENSG00000148737	TCF7L2	TCF-4|TCF4	transcription factor 7 like 2	protein-coding
16900	chr4	127781753	127783689	+	28	NA	promoter-TSS (NM_001317382)	promoter-TSS (NM_001317382)	399	NM_014278	22824		NM_014278	ENSG00000164070	HSPA4L	APG-1|APG1|HSPH3|Osp94	heat shock protein family A (Hsp70) member 4 like	protein-coding
10496	chr12	49516666	49517948	+	28	NA	intron (NR_120663, intron 11 of 14)	intron (NR_120663, intron 11 of 14)	-21723	NM_001314030	23416		NM_012284	ENSG00000135519	KCNH3	BEC1|ELK2|Kv12.2	potassium voltage-gated channel subfamily H member 3	protein-coding
18749	chr6	149316561	149317616	+	28	NA	promoter-TSS (NM_001292034)	promoter-TSS (NM_001292034)	-624	NM_001292034	23118		NM_015093	ENSG00000055208	TAB2	CHTD2|MAP3K7IP2|TAB-2	TGF-beta activated kinase 1 (MAP3K7) binding protein 2	protein-coding
10392	chr6	77368633	77369268	+	28	NA	Intergenic	LTR1A2|LTR|ERV1	94541	NM_000863	3351		NM_000863	ENSG00000135312	HTR1B	5-HT-1B|5-HT-1D-beta|5-HT1B|5-HT1DB|HTR1D2|HTR1DB|S12	5-hydroxytryptamine receptor 1B	protein-coding
9180	chr14	46584629	46585728	+	28	NA	Intergenic	MER51-int|LTR|ERV1	66603	NM_080746	140801		NM_080746	ENSG00000165496	RPL10L	RPL10_5_1358|SPGF63	ribosomal protein L10 like	protein-coding
17006	chr6	47632974	47634506	+	28	NA	Intergenic	MLT1D|LTR|ERVL-MaLR	-22732	NM_153839	222611		NM_153839		ADGRF2	GPR111|PGR20|hGPCR35	adhesion G protein-coupled receptor F2	ncRNA
8669	chr22	45756889	45757566	+	28	NA	intron (NM_013236, intron 9 of 11)	intron (NM_013236, intron 9 of 11)	-3297	NR_039919	100616253		NR_039919	ENSG00000264160	MIR4762	-	microRNA 4762	ncRNA
18072	chr17	40283308	40285498	+	28	NA	TTS (NM_133264)	TTS (NM_133264)	-3476	NM_001254	990		NM_001254	ENSG00000094804	CDC6	CDC18L|HsCDC18|HsCDC6|MGORS5	cell division cycle 6	protein-coding
13701	chr8	30743274	30744639	+	28	NA	promoter-TSS (NM_001282189)	promoter-TSS (NM_001282189)	-208	NM_005671	7993		NM_005671	ENSG00000104691	UBXN8	D8S2298E|REP8|UBXD6	UBX domain protein 8	protein-coding
13639	chr1	11478799	11479793	+	28	NA	5' UTR (NM_020780, exon 1 of 21)	5' UTR (NM_020780, exon 1 of 21)	141	NM_020780	57540		NM_020780	ENSG00000204624	DISP3	PTCHD2	dispatched RND transporter family member 3	protein-coding
6740-2	chr2	62526577	62527399	+	28	NA	Intergenic	AluJo|SINE|Alu	-20793	NM_198276	200728		NM_198276	ENSG00000186889	TMEM17	-	transmembrane protein 17	protein-coding
14527-2	chr6	155881615	155883583	+	28	NA	Intergenic	Intergenic	-64198	NR_031606	100302259		NR_031606	ENSG00000221456	MIR1202	MIRN1202|hsa-mir-1202	microRNA 1202	ncRNA
10855	chr2	151260974	151261953	+	28	NA	intron (NM_198557, intron 1 of 3)	CpG	400	NM_198557	375287		NM_198557	ENSG00000184898	RBM43	C2orf38	RNA binding motif protein 43	protein-coding
9044-2	chr9	94913954	94914794	+	28	NA	intron (NM_032823, intron 5 of 14)	intron (NM_032823, intron 5 of 14)	31180	NR_147613	101928119		NR_147613		LOC101928119	-	uncharacterized LOC101928119	ncRNA
18747	chr9	42395932	42397657	+	28	NA	Intergenic	MLT1A1-int|LTR|ERVL-MaLR	172555	NR_126050	103908605		NR_126050		FAM88E	-	family with sequence similarity 88 member E	ncRNA
13354	chr5_GL339449v2_alt	830	1767	+	28	NA	intron (NM_033281, intron 1 of 3).2	CpG	356	NM_033281	92259		NM_033281	ENSG00000134056	KGD4	DC47|MRP-S36|MRPS36	alpha-ketoglutarate dehydrogenase subunit 4	protein-coding
19806	chr2	152335493	152337105	+	28	NA	intron (NM_052905, intron 1 of 25)	CpG	1125	NM_052905	114793		NM_052905	ENSG00000157827	FMNL2	FHOD2	formin like 2	protein-coding
11246	chr12	42325527	42326544	+	28	NA	promoter-TSS (NM_001364830)	promoter-TSS (NM_001364830)	59	NM_033114	85437		NM_033114	ENSG00000139168	ZCRB1	MADP-1|MADP1|RBM36|SNRNP31|ZCCHC19	zinc finger CCHC-type and RNA binding motif containing 1	protein-coding
20651	chr14	22560411	22562849	+	28	NA	Intergenic	Intergenic	-4568	NR_146543	105370400		NR_146543	ENSG00000259054	LINC02332	-	long intergenic non-protein coding RNA 2332	ncRNA
13895	chr4	82989510	82990627	+	28	NA	intron (NM_001115007, intron 1 of 12)	HERVL40-int|LTR|ERVL	20755	NM_194282	132660		NM_194282	ENSG00000189308	LIN54	CXCDC1|JC8.6|MIP120|TCX1	lin-54 DREAM MuvB core complex component	protein-coding
15035	chr15	65295443	65296857	+	28	NA	promoter-TSS (NR_002756)	promoter-TSS (NR_002756)	99	NR_002756	26831		NR_002756	ENSG00000199568	RNU5A-1	RNU5|RNU5A|RNU5C|U5A|U5B1	RNA, U5A small nuclear 1	snRNA
9964	chr11	2142457	2143354	+	27	NA	intron (NR_133657, intron 1 of 2)	intron (NR_133657, intron 1 of 2)	-1962	NM_001291862	3481		NM_000612	ENSG00000167244	IGF2	C11orf43|GRDF|IGF-II|PP9974|SRS3	insulin like growth factor 2	protein-coding
7309-2	chr18	5295755	5296297	+	27	NA	promoter-TSS (NM_001243702)	promoter-TSS (NM_001243702)	-6	NM_001143823	7541		NM_003409	ENSG00000198081	ZBTB14	ZF5|ZFP-161|ZFP-5|ZFP161|ZNF478	zinc finger and BTB domain containing 14	protein-coding
11955	chr2	166957492	166958233	+	27	NA	intron (NM_001079810, intron 2 of 9)	MamRep137|DNA|TcMar-Tigger	69375	NM_001079810	129446		NM_152381	ENSG00000163092	XIRP2	CMYA3	xin actin binding repeat containing 2	protein-coding
44625-2	chr2	159001749	159001787	+	27	NA	intron (NM_001350064, intron 2 of 26)	MIRb|SINE|MIR	33128	NR_146421	85461		NM_033394	ENSG00000115183	TANC1	ROLSB|TANC	tetratricopeptide repeat, ankyrin repeat and coiled-coil containing 1	protein-coding
24157	chr1	143184616	143188031	+	27	NA	Intergenic	Intergenic	236269	NR_027354	645166		NR_027354	ENSG00000288905	LSP1P5	-	LSP1 pseudogene 5	pseudo
7122	chr13	71878980	71879781	+	27	NA	Intergenic	Intergenic	-12176	NM_080759	1602		NM_004392	ENSG00000276644	DACH1	DACH	dachshund family transcription factor 1	protein-coding
10298-3	chr20	25436954	25437936	+	27	NA	intron (NM_021067, intron 5 of 6)	L1MB3|LINE|L1	29762	NR_134574	9837		NM_021067	ENSG00000101003	GINS1	IMD55|PSF1	GINS complex subunit 1	protein-coding
11303	chr1	233253357	233254409	+	27	NA	intron (NM_014801, intron 5 of 33)	intron (NM_014801, intron 5 of 33)	41842	NM_014801	80003		NM_014801	ENSG00000135749	PCNX2	PCNXL2	pecanex 2	protein-coding
19449	chr8	97643621	97645525	+	27	NA	exon (NM_001363139, exon 1 of 10)	exon (NM_001363139, exon 1 of 10)	389	NM_001363139	92140		NM_178812	ENSG00000147649	MTDH	3D3|AEG-1|AEG1|LYRIC|LYRIC/3D3	metadherin	protein-coding
35270	chr4	121689720	121694197	+	27	NA	intron (NM_001154, intron 2 of 12)	intron (NM_001154, intron 2 of 12)	5022	NM_001154	308		NM_001154	ENSG00000164111	ANXA5	ANX5|CPB-I|ENX2|HEL-S-7|PP4|RPRGL3|VAC-alph	annexin A5	protein-coding
7646	chr1	21345282	21346263	+	27	NA	promoter-TSS (NM_001113348)	promoter-TSS (NM_001113348)	-268	NM_001113348	1889		NM_001397	ENSG00000117298	ECE1	ECE	endothelin converting enzyme 1	protein-coding
14286	chr2	11344718	11345786	+	27	NA	promoter-TSS (NM_004850)	promoter-TSS (NM_004850)	185	NM_001321643	9475		NM_004850	ENSG00000134318	ROCK2	ROCK-II	Rho associated coiled-coil containing protein kinase 2	protein-coding
11005	chr11	34692074	34693018	+	27	NA	Intergenic	L1PA2|LINE|L1	50174	NM_001378046	26298		NM_012153	ENSG00000135373	EHF	ESE3|ESE3B|ESEJ	ETS homologous factor	protein-coding
26200	chr6	21825212	21829512	+	27	NA	intron (NR_015410, intron 4 of 11)	intron (NR_015410, intron 4 of 11)	160949	NR_015410	401237		NR_015410		CASC15	CANT|LINC00340|lnc-SOX4-1	cancer susceptibility 15	ncRNA
9602	chr12	120725307	120726455	+	27	NA	promoter-TSS (NM_000017)	promoter-TSS (NM_000017)	55	NM_000017	35		NM_000017	ENSG00000122971	ACADS	ACAD3|SCAD	acyl-CoA dehydrogenase short chain	protein-coding
23306	chr10	53027390	53031501	+	27	NA	Intergenic	HERV30-int|LTR|ERV1	-256661	NM_001378373	4153		NM_000242	ENSG00000165471	MBL2	COLEC1|HSMBPC|MBL|MBL2D|MBP|MBP-C|MBP1|MBPD	mannose binding lectin 2	protein-coding
10745-2	chr6	28224863	28225909	+	27	NA	intron (NM_001199479, intron 1 of 4)	CpG	111	NM_001199479	7746		NM_006299	ENSG00000137185	ZSCAN9	PRD51|ZNF193	zinc finger and SCAN domain containing 9	protein-coding
9561	chr12	50396285	50397242	+	27	NA	promoter-TSS (NM_001145475)	promoter-TSS (NM_001145475)	-154	NM_001145475	121006		NM_001145475	ENSG00000185958	FAM186A	-	family with sequence similarity 186 member A	protein-coding
12295	chr5	176646726	176648168	+	27	NA	promoter-TSS (NM_012171)	promoter-TSS (NM_012171)	-37	NM_001366491	26262		NM_012171	ENSG00000048140	TSPAN17	FBX23|FBXO23|TM4SF17	tetraspanin 17	protein-coding
12399	chr3	99920384	99921709	+	27	NA	intron (NM_182909, intron 4 of 5)	intron (NM_182909, intron 4 of 5)	43352	NR_037486	100500859		NR_037486	ENSG00000264897	MIR3921	-	microRNA 3921	ncRNA
7289	chr1	3068605	3069311	+	27	NA	promoter-TSS (NM_022114)	promoter-TSS (NM_022114)	-245	NM_199454	63976		NM_022114	ENSG00000142611	PRDM16	CMD1LL|KMT8F|LVNC8|MEL1|PFM13	PR/SET domain 16	protein-coding
8070	chr16	8960045	8960690	+	27	NA	intron (NM_003470, intron 1 of 30)	intron (NM_003470, intron 1 of 30)	3539	NM_003470	7874		NM_003470	ENSG00000187555	USP7	C16DELp13.2|DEL16P13.2|HAFOUS|HAUSP|TEF1	ubiquitin specific peptidase 7	protein-coding
10611	chr8	66431943	66433261	+	27	NA	promoter-TSS (NM_144650)	promoter-TSS (NM_144650)	98	NM_144650	137872		NM_144650	ENSG00000147576	ADHFE1	ADH8|HMFT2263|HOT	alcohol dehydrogenase iron containing 1	protein-coding
18022	chr17	38798856	38800423	+	27	NA	TTS (NR_073428)	TTS (NR_073428)	266	NM_003559	8396		NM_003559	ENSG00000276293	PIP4K2B	PI5P4KB|PIP5K2B|PIP5KIIB|PIP5KIIbeta|PIP5P4KB	phosphatidylinositol-5-phosphate 4-kinase type 2 beta	protein-coding
14988	chr7	151519407	151520594	+	27	NA	promoter-TSS (NM_005614)	promoter-TSS (NM_005614)	-105	NM_005614	6009		NM_005614	ENSG00000106615	RHEB	RHEB2	Ras homolog, mTORC1 binding	protein-coding
8760-3	chrX	110587936	110588579	+	27	NA	Intergenic	MIR3|SINE|MIR	67945	NR_002718
17749	chr2	101329461	101331224	+	27	NA	Intergenic	Intergenic	20892	NR_049881	100847007		NR_049881	ENSG00000264857	MIR5696	-	microRNA 5696	ncRNA
8840-2	chr17	67076087	67076988	+	27	NA	3' UTR (NM_014877, exon 33 of 33)	3' UTR (NM_014877, exon 33 of 33)	31983	NM_000727	786		NM_000727	ENSG00000108878	CACNG1	CACNLG	calcium voltage-gated channel auxiliary subunit gamma 1	protein-coding
11886	chr12	32139259	32140334	+	27	NA	intron (NR_148725, intron 1 of 9)	AluSc|SINE|Alu	32949	NM_001354189	636		NM_001714	ENSG00000151746	BICD1	BICD|bic-D 1	BICD cargo adaptor 1	protein-coding
15847	chr9	72826767	72829301	+	27	NA	intron (NM_138691, intron 21 of 23)	MIRc|SINE|MIR	46075	NR_121181	101927258		NR_121120	ENSG00000236849	LINC01474	-	long intergenic non-protein coding RNA 1474	ncRNA
10238	chr11	57798681	57799694	+	27	NA	intron (NM_001331, intron 6 of 18)	intron (NM_001331, intron 6 of 18)	37385	NM_001085468	1500		NM_001331	ENSG00000198561	CTNND1	BCDS2|CAS|CTNND|P120CAS|P120CTN|p120|p120(CAS)|p120(CTN)	catenin delta 1	protein-coding
8533	chr1	9950237	9951151	+	27	NA	intron (NR_158969, intron 4 of 4)	intron (NR_158969, intron 4 of 4)	7219	NM_001297779	64802		NM_022787	ENSG00000173614	NMNAT1	LCA9|NMNAT|PNAT1|SHILCA	nicotinamide nucleotide adenylyltransferase 1	protein-coding
24926-2	chr1	23555645	23557365	+	27	NA	Intergenic	MIRb|SINE|MIR	2996	NM_002167	3399		NM_002167	ENSG00000117318	ID3	HEIR-1|bHLHb25	inhibitor of DNA binding 3	protein-coding
11495	chr16	1678001	1679306	+	27	NA	TTS (NM_020825)	TTS (NM_020825)	374	NM_144570	90861		NM_144570	ENSG00000206053	JPT2	C16orf34|HN1L|L11	Jupiter microtubule associated homolog 2	protein-coding
23923	chr17	48022874	48025769	+	27	NA	Intergenic	CpG	-8561	NR_162100	113218499		NR_162100		MIR10226	-	microRNA 10226	ncRNA
11961	chr2	240025315	240026275	+	27	NA	promoter-TSS (NR_136158)	promoter-TSS (NR_136158)	-393	NM_001322019	4705		NM_004544	ENSG00000130414	NDUFA10	CI-42KD|CI-42k|MC1DN22	NADH:ubiquinone oxidoreductase subunit A10	protein-coding
8772	chr11	11844629	11845510	+	27	NA	intron (NM_001372101, intron 1 of 26)	Cheshire|DNA|hAT-Charlie	3097	NM_001372099	55031		NM_017944	ENSG00000170242	USP47	TRFP	ubiquitin specific peptidase 47	protein-coding
13755-2	chr9	104856262	104857577	+	27	NA	intron (NM_005502, intron 7 of 49)	intron (NM_005502, intron 7 of 49)	71236	NM_005502	19		NM_005502	ENSG00000165029	ABCA1	ABC-1|ABC1|CERP|HDLCQTL13|HDLDT1|HPALP1|TGD	ATP binding cassette subfamily A member 1	protein-coding
10078	chr1	16732219	16733094	+	27	NA	Intergenic	MER49|LTR|ERV1	-7860	NR_004400	26863		NR_004400	ENSG00000206737	RNVU1-18	RNU1-25|RNU1-25P|RNU1-5|RNU1P1|RNU1P9|U1.15|U1P101|U1P15|vU1.18	RNA, variant U1 small nuclear 18	snRNA
12009	chr1	224356703	224357517	+	27	NA	intron (NR_102347, intron 1 of 3)	CpG	231	NR_102347	29097		NM_014184	ENSG00000143771	CNIH4	CNIH-4|CNIH2|HSPC163	cornichon family member 4	protein-coding
10726	chr16	47896964	47897864	+	27	NA	intron (NR_110650, intron 4 of 5)	L1PA6|LINE|L1	-10284	NR_110649	100507534		NR_110649	ENSG00000261325	LINC02192	-	long intergenic non-protein coding RNA 2192	ncRNA
15081-3	chr19	57191019	57192482	+	27	NA	5' UTR (NM_003417, exon 1 of 4)	5' UTR (NM_003417, exon 1 of 4)	250	NM_003417	9422		NM_003417	ENSG00000083844	ZNF264	-	zinc finger protein 264	protein-coding
16018	chr13	51637618	51639096	+	27	NA	intron (NM_052950, intron 1 of 11)	L2|LINE|L2	53895	NM_052950	115825		NM_052950	ENSG00000139668	WDFY2	PROF|WDF2|ZFYVE22	WD repeat and FYVE domain containing 2	protein-coding
17587	chr10	22436579	22438238	+	27	NA	non-coding (NR_036533, exon 1 of 1)	non-coding (NR_036533, exon 1 of 1)	521	NR_036533	100499489		NR_036533		LINC03027	-	long intergenic non-protein coding RNA 3027	ncRNA
11830	chr2	237613779	237614800	+	27	NA	Intergenic	Intergenic	-13298	NM_001137550	9208		NM_004735	ENSG00000124831	LRRFIP1	FLAP-1|FLAP1|FLIIAP1|GCF-2|GCF2|HUFI-1|TRIP	LRR binding FLII interacting protein 1	protein-coding
14608	chr17	59355328	59356539	+	27	NA	intron (NM_001005404, intron 2 of 4)	intron (NM_001005404, intron 2 of 4)	-10150	NR_039882	100616204		NR_039882	ENSG00000263857	MIR4729	-	microRNA 4729	ncRNA
47858	chr14	95665374	95665876	+	27	NA	intron (NR_152604, intron 4 of 7)	LTR32|LTR|ERVL	13528	NR_028288	27004		NM_012468		TCL6	TNG1|TNG2	T cell leukemia/lymphoma 6	ncRNA
9590	chr2	42567481	42568394	+	27	NA	promoter-TSS (NM_001282756)	promoter-TSS (NM_001282756)	-108	NM_001282756	57504		NM_020744	ENSG00000057935	MTA3	-	metastasis associated 1 family member 3	protein-coding
15010-2	chr18	48952144	48953267	+	27	NA	Intergenic	CpG	-1994	NM_005904	4092		NM_005904	ENSG00000101665	SMAD7	CRCS3|MADH7|MADH8	SMAD family member 7	protein-coding
10824	chr19	9538241	9538982	+	27	NA	promoter-TSS (NM_024106)	promoter-TSS (NM_024106)	34	NM_001318056	79088		NM_024106	ENSG00000130818	ZNF426	K-RBP	zinc finger protein 426	protein-coding
11094	chr2	27582757	27583667	+	27	NA	TTS (NM_032266)	TTS (NM_032266)	170	NM_032434	84450		NM_032434	ENSG00000243943	ZNF512	-	zinc finger protein 512	protein-coding
11083	chr8	8624873	8626351	+	27	NA	Intergenic	Intergenic	-76325	NM_194284	137075		NM_194284	ENSG00000253958	CLDN23	CLDNL|hCG1646163	claudin 23	protein-coding
17494	chr5	177365882	177367665	+	27	NA	exon (NM_001366618, exon 4 of 14)	exon (NM_001366618, exon 4 of 14)	8849	NM_006480	10636		NM_006480	ENSG00000169220	RGS14	-	regulator of G protein signaling 14	protein-coding
7630-2	chr8	12755606	12756402	+	27	NA	promoter-TSS (NR_138256).2	promoter-TSS (NR_138256).2	-478	NR_138255	91694		NM_152271	ENSG00000154359	LONRF1	RNF191	LON peptidase N-terminal domain and ring finger 1	protein-coding
7616	chr1	19619359	19620282	+	27	NA	intron (NR_033758, intron 2 of 4)	intron (NR_033758, intron 2 of 4)	12013	NR_077246	644068		NR_077246		RPS14P3	RPS14_1_16	ribosomal protein S14 pseudogene 3	pseudo
10067-2	chr14	75647543	75648930	+	27	NA	TTS (NM_017791)	TTS (NM_017791)	12640	NM_007176	11161		NM_007176	ENSG00000133935	ERG28	C14orf1|NET51	ergosterol biosynthesis 28 homolog	protein-coding
34409	chr9	14314317	14316900	+	27	NA	promoter-TSS (NR_161382)	promoter-TSS (NR_161382)	529	NM_001369469	4781		NM_005596	ENSG00000147862	NFIB	CTF|HMGIC/NFIB|MACID|NF-I/B|NF1-B|NFI-B|NFI-RED|NFIB2|NFIB3	nuclear factor I B	protein-coding
44625	chr2	158994770	158996081	+	27	NA	intron (NM_001350064, intron 1 of 26)	intron (NM_001350064, intron 1 of 26)	26785	NR_146421	85461		NM_033394	ENSG00000115183	TANC1	ROLSB|TANC	tetratricopeptide repeat, ankyrin repeat and coiled-coil containing 1	protein-coding
10442	chr13	98201800	98202653	+	27	NA	intron (NM_001001715, intron 1 of 2)	intron (NM_001001715, intron 1 of 2)	-6298	NR_036129	100422881		NR_036129	ENSG00000263399	MIR3170	mir-3170	microRNA 3170	ncRNA
10472	chr7	94654937	94656222	+	27	NA	promoter-TSS (NM_001184961)	promoter-TSS (NM_001184961)	554	NM_001099400	8910		NM_003919	ENSG00000127990	SGCE	DYT11|ESG|epsilon-SG	sarcoglycan epsilon	protein-coding
11669-2	chr5	7850642	7851454	+	27	NA	promoter-TSS (NM_001089584)	promoter-TSS (NM_001089584)	85	NM_001089584	134121		NM_001089584	ENSG00000215217	CFAP90	C5orf49	cilia and flagella associated protein 90	protein-coding
11066-2	chr6	36885510	36886405	+	27	NA	promoter-TSS (NM_001286637)	promoter-TSS (NM_001286637)	5	NM_152734	221477		NM_152734	ENSG00000198663	C6orf89	BRAP|PS1TP5TP1	chromosome 6 open reading frame 89	protein-coding
23313	chr16	10331631	10333702	+	27	NA	Intergenic	AluJo|SINE|Alu	-53395	NR_045816	80063		NM_024997	ENSG00000166669	ATF7IP2	MCAF2	activating transcription factor 7 interacting protein 2	protein-coding
8324	chr10	33287553	33288327	+	27	NA	intron (NM_001244973, intron 2 of 16)	intron (NM_001244973, intron 2 of 16)	46727	NM_001330068	8829		NM_003873	ENSG00000099250	NRP1	BDCA4|CD304|NP1|NRP|VEGF165R	neuropilin 1	protein-coding
16463	chr10	123153745	123155196	+	27	NA	promoter-TSS (NM_004725)	promoter-TSS (NM_004725)	68	NM_004725	9184		NM_004725	ENSG00000154473	BUB3	BUB3L|hBUB3	BUB3 mitotic checkpoint protein	protein-coding
23475	chr7	158828303	158830430	+	27	NA	exon (NM_001367773, exon 1 of 23)	exon (NM_001367773, exon 1 of 23)	143	NM_001367773	57488		NM_020728	ENSG00000117868	ESYT2	CHR2SYT|E-Syt2|FAM62B	extended synaptotagmin 2	protein-coding
21470	chrUn_GL000214v1	119644	121605	+	27	NA	NA	Intergenic	NA	NA
12487	chr5	121961333	121962490	+	27	NA	promoter-TSS (NM_152546)	promoter-TSS (NM_152546)	-64	NM_152546	153443		NM_152546	ENSG00000151304	SRFBP1	BUD22|P49|Rlb1|STRAP|p49/STRAP	serum response factor binding protein 1	protein-coding
11013	chr9	69104967	69105987	+	27	NA	Intergenic	Intergenic	-15787	NM_001170414	9414		NM_004817	ENSG00000119139	TJP2	C9DUPq21.11|DFNA51|DUP9q21.11|FHCA1|PFIC4|X104|ZO2	tight junction protein 2	protein-coding
22681	chr2	207905164	207907485	+	27	NA	intron (NM_001080475, intron 6 of 7)	intron (NM_001080475, intron 6 of 7)	119203	NM_001080475	389072		NM_001080475	ENSG00000178385	PLEKHM3	DAPR|PLEKHM1L	pleckstrin homology domain containing M3	protein-coding
10632	chr12	82996231	82997244	+	27	NA	intron (NM_152588, intron 8 of 11)	intron (NM_152588, intron 8 of 11)	309582	NM_001320322	160335		NM_152588	ENSG00000179104	TMTC2	IBDBP1	transmembrane O-mannosyltransferase targeting cadherins 2	protein-coding
11497	chr4	146175637	146176468	+	27	NA	intron (NM_007080, intron 1 of 3)	CpG	334	NM_007080	11157		NM_007080	ENSG00000164167	LSM6	YDR378C	LSM6 homolog, U6 small nuclear RNA and mRNA degradation associated	protein-coding
29455	chr18	7115732	7118491	+	27	NA	intron (NM_005559, intron 1 of 62)	CpG	686	NM_005559	284217		NM_005559	ENSG00000101680	LAMA1	LAMA|PTBHS|S-LAM-alpha	laminin subunit alpha 1	protein-coding
12837	chr8	42051812	42052876	+	27	NA	promoter-TSS (NM_006766)	promoter-TSS (NM_006766)	-357	NM_006766	7994		NM_006766	ENSG00000083168	KAT6A	ARTHS|MOZ|MRD32|MYST-3|MYST3|RUNXBP2|ZC2HC6A|ZNF220	lysine acetyltransferase 6A	protein-coding
10175-2	chrY	11332814	11334192	+	27	NA	Intergenic	CpG	1088087	NR_033667	352887		NR_033667	ENSG00000291034	GYG2P1	GYG2P	glycogenin 2 pseudogene 1	pseudo
7037	chr7	55073739	55074493	+	27	NA	intron (NM_001346941, intron 1 of 21)	intron (NM_001346941, intron 1 of 21)	-35723	NM_001346900	1956		NM_005228	ENSG00000146648	EGFR	ERBB|ERBB1|ERRP|HER1|NISBD2|PIG61|mENA	epidermal growth factor receptor	protein-coding
15108-2	chr3	149401118	149402604	+	27	NA	Intergenic	Intergenic	24083	NR_109809	100874091		NR_046650	ENSG00000240541	TM4SF1-AS1	-	TM4SF1 antisense RNA 1	ncRNA
8215	chr16	77358993	77359736	+	27	NA	exon (NM_001326358, exon 8 of 23)	exon (NM_001326358, exon 8 of 23)	75670	NM_199355	170692		NM_139054	ENSG00000140873	ADAMTS18	ADAMTS21|KNO2|MMCAT	ADAM metallopeptidase with thrombospondin type 1 motif 18	protein-coding
8786	chr10	59908141	59908752	+	27	NA	Intergenic	Intergenic	-1890	NM_005436	8030		NM_005436	ENSG00000108091	CCDC6	D10S170|H4|PTC|PTC1|TPC|TST1	coiled-coil domain containing 6	protein-coding
17694	chr2	159064334	159066221	+	27	NA	intron (NM_001350065, intron 3 of 27)	intron (NM_001350065, intron 3 of 27)	96637	NR_146421	85461		NM_033394	ENSG00000115183	TANC1	ROLSB|TANC	tetratricopeptide repeat, ankyrin repeat and coiled-coil containing 1	protein-coding
11386	chr3	123143415	123144572	+	27	NA	intron (NM_006810, intron 11 of 16)	intron (NM_006810, intron 11 of 16)	-17801	NR_106960	102465667		NR_106960	ENSG00000284421	MIR7110	hsa-mir-7110	microRNA 7110	ncRNA
7430	chr20	6623253	6624591	+	27	NA	Intergenic	(ATATGG)n|Simple_repeat|Simple_repeat	112214	NR_146909	105372516		NR_146909		LINC01713	-	long intergenic non-protein coding RNA 1713	ncRNA
14724	chr10	102310112	102311300	+	27	NA	intron (NR_165087, intron 3 of 38)	intron (NR_165087, intron 3 of 38)	65174	NR_165085	8729		NM_004193	ENSG00000107862	GBF1	ARF1GEF|CMT2GG|CMTDI2|CMTDIA	golgi brefeldin A resistant guanine nucleotide exchange factor 1	protein-coding
24926	chr1	23553643	23554913	+	27	NA	Intergenic	Intergenic	5223	NM_002167	3399		NM_002167	ENSG00000117318	ID3	HEIR-1|bHLHb25	inhibitor of DNA binding 3	protein-coding
9015-2	chr4	91822408	91823074	+	27	NA	Intergenic	LTR22|LTR|ERVK	454561	NR_125920	101929194		NR_125920		LNCPRESS2	-	lncRNA p53 regulated and ESC associated 2	ncRNA
11777	chr10	130135823	130136825	+	27	NA	promoter-TSS (NM_001321980)	promoter-TSS (NM_001321980)	-51	NM_001199868	10539		NM_006541	ENSG00000108010	GLRX3	GLRX4|GRX3|GRX4|PICOT|TXNL2|TXNL3	glutaredoxin 3	protein-coding
7680	chr4	48603331	48604048	+	27	NA	intron (NM_015030, intron 11 of 63)	intron (NM_015030, intron 11 of 63)	113437	NM_175619	326340		NM_175619	ENSG00000182223	ZAR1	Z3CXXC6	zygote arrest 1	protein-coding
9458	chr2	61469570	61470485	+	26	NA	intron (NM_014709, intron 1 of 79)	intron (NM_014709, intron 1 of 79)	1060	NM_014709	9736		NM_014709	ENSG00000115464	USP34	-	ubiquitin specific peptidase 34	protein-coding
8923	chr3	9249264	9250356	+	26	NA	promoter-TSS (NM_001033117)	promoter-TSS (NM_001033117)	54	NR_146969	101927440		NR_146969	ENSG00000235830	SRGAP3-AS4	-	SRGAP3 antisense RNA 4	ncRNA
9476	chr7	151340794	151342063	+	26	NA	promoter-TSS (NM_001363529)	promoter-TSS (NM_001363529)	-384	NM_001385355	51667		NM_016118	ENSG00000013374	NUB1	BS4|NUB1L|NYREN18	negative regulator of ubiquitin like proteins 1	protein-coding
16272	chr7	5222070	5223673	+	26	NA	intron (NM_015610, intron 8 of 12)	intron (NM_015610, intron 8 of 12)	8602	NM_001033520	26100		NM_015610	ENSG00000157954	WIPI2	ATG18B|Atg21|CGI-50|IDDSSA|WIPI-2	WD repeat domain, phosphoinositide interacting 2	protein-coding
19112-2	chr12	25250842	25251836	+	26	NA	promoter-TSS (NM_001369787)	promoter-TSS (NM_001369787)	-410	NM_004985	3845		NM_004985	ENSG00000133703	KRAS	C-K-RAS|C-K-RAS|CFC2|K-RAS2A|K-RAS2B|K-RAS4A|K-RAS4B|K-Ras|K-Ras 2|KI-RAS|KRAS1|KRAS2|NS|NS3|OES|RALD|RASK2|c-Ki-ras|c-Ki-ras2	KRAS proto-oncogene, GTPase	protein-coding
12701	chr11	910318	911882	+	26	NA	promoter-TSS (NM_001142676)	promoter-TSS (NM_001142676)	-290	NM_023947	66005		NM_023947	ENSG00000177830	CHID1	GL008|SI-CLP|SICLP	chitinase domain containing 1	protein-coding
7869	chrX	10833302	10833911	+	26	NA	promoter-TSS (NM_033290)	promoter-TSS (NM_033290)	77	NM_033290	4281		NM_000381	ENSG00000101871	MID1	BBBG1|FXY|GBBB|GBBB1|MIDIN|OGS1|OS|OSX|RNF59|TRIM18|XPRF|ZNFXY	midline 1	protein-coding
19996	chr7	20340125	20342588	+	26	NA	intron (NM_002214, intron 1 of 13)	intron (NM_002214, intron 1 of 13)	-9594	NR_110119	101927811		NR_110119	ENSG00000271133	ITGB8-AS1	-	ITGB8 antisense RNA 1	ncRNA
17175	chr9	42378375	42380790	+	26	NA	Intergenic	Intergenic	180720	NR_126166	100996582		NR_126166		FAM74A7	-	family with sequence similarity 74 member A7	ncRNA
12560	chr1	229092877	229094403	+	26	NA	Intergenic	Intergenic	81161	NR_039659	100616234		NR_039659	ENSG00000283468	MIR4454	-	microRNA 4454	ncRNA
17473	chr4_GL000257v2_alt	439992	442548	+	26	NA	Intergenic	LTR10C|LTR|ERV1	49257	NM_001075	7365		NM_001075	ENSG00000109181	UGT2B10	UDPGT2B10	UDP glucuronosyltransferase family 2 member B10	protein-coding
33410	chr12	6372013	6374754	+	26	NA	intron (NM_001159575, intron 2 of 12)	intron (NM_001159575, intron 2 of 12)	-1777	NM_001270987	4055		NM_002342	ENSG00000111321	LTBR	D12S370|LT-BETA-R|TNF-R-III|TNFCR|TNFR-RP|TNFR2-RP|TNFR3|TNFRSF3	lymphotoxin beta receptor	protein-coding
8236	chr10	82964535	82965339	+	26	NA	intron (NM_001370081, intron 6 of 8)	intron (NM_001370081, intron 6 of 8)	712152	NR_134317	105378397		NR_134317	ENSG00000233945	LINC02650	-	long intergenic non-protein coding RNA 2650	ncRNA
8927	chr22	17379143	17380048	+	26	NA	intron (NM_001290047, intron 1 of 18)	(GT)n|Simple_repeat|Simple_repeat	10135	NM_001290047	27443		NM_031413	ENSG00000099954	CECR2	-	CECR2 histone acetyl-lysine reader	protein-coding
8735	chr11	57761710	57762906	+	26	NA	intron (NM_001085467, intron 1 of 16)	intron (NM_001085467, intron 1 of 16)	506	NM_001085468	1500		NM_001331	ENSG00000198561	CTNND1	BCDS2|CAS|CTNND|P120CAS|P120CTN|p120|p120(CAS)|p120(CTN)	catenin delta 1	protein-coding
9010	chr1	150321091	150322053	+	26	NA	promoter-TSS (NM_004698)	promoter-TSS (NM_004698)	39	NM_004698	9129		NM_004698	ENSG00000117360	PRPF3	HPRP3|HPRP3P|PRP3|Prp3p|RP18|SNRNP90	pre-mRNA processing factor 3	protein-coding
19109	chr3	113662075	113664351	+	26	NA	intron (NM_001009899, intron 6 of 6)	MLT1M|LTR|ERVL-MaLR	33429	NM_001009899	205717		NM_001009899	ENSG00000176542	USF3	KIAA2018	upstream transcription factor family member 3	protein-coding
7672	chr10	127484942	127485732	+	26	NA	Intergenic	Intergenic	-63972	NM_001030013	594857		NM_001030013	ENSG00000214285	NPS	-	neuropeptide S	protein-coding
13212	chr5	52988654	52990318	+	26	NA	non-coding (NR_073103, exon 1 of 29)	non-coding (NR_073103, exon 1 of 29)	134	NR_073107	3673		NM_002203	ENSG00000164171	ITGA2	BR|CD49B|GPIa|HPA-5|VLA-2|VLAA2	integrin subunit alpha 2	protein-coding
14630	chr2	237085143	237086364	+	26	NA	promoter-TSS (NM_006710)	promoter-TSS (NM_006710)	-136	NM_006710	10920		NM_006710	ENSG00000198612	COPS8	COP9|CSN8|SGN8	COP9 signalosome subunit 8	protein-coding
22309	chr13	103515915	103518688	+	26	NA	Intergenic	Intergenic	92101	NR_126374	104326190		NR_126374		LINC01309	TCONS_l2_00007459	long intergenic non-protein coding RNA 1309	ncRNA
13790	chr16	19752682	19754608	+	26	NA	intron (NR_130967, intron 5 of 7)	MLT1L|LTR|ERVL-MaLR	-35418	NM_001348530	400506		NM_001012991	ENSG00000103550	KNOP1	101F10.1|C16orf88|FAM191A|TSG118	lysine rich nucleolar protein 1	protein-coding
13239	chr6	98641560	98642833	+	26	NA	Intergenic	Intergenic	189504	NR_148381	105447646		NR_148381		PNKY	-	long intergenic non-protein coding RNA PNKY	ncRNA
26973	chr3	15858594	15859543	+	26	NA	intron (NM_001349279, intron 1 of 28)	CpG	746	NM_001349279	23243		NM_015199	ENSG00000206560	ANKRD28	CFAP79|FAP79|PITK|PPP1R65	ankyrin repeat domain 28	protein-coding
16758	chr20	14336398	14337867	+	26	NA	intron (NM_198391, intron 1 of 2)	intron (NM_198391, intron 1 of 2)	480	NM_198391	23767		NM_013281	ENSG00000125848	FLRT3	HH21	fibronectin leucine rich transmembrane protein 3	protein-coding
11438	chr19	9583715	9584800	+	26	NA	intron (NM_001308269, intron 1 of 4)	CpG	247	NM_001008727	7675		NM_001008727	ENSG00000197961	ZNF121	D19S204|ZHC32|ZNF20	zinc finger protein 121	protein-coding
10504-3	chr6	43635429	43636452	+	26	NA	promoter-TSS (NM_014628)	promoter-TSS (NM_014628)	100	NM_014628	9587		NM_014628	ENSG00000124688	MAD2L1BP	CMT2|p31comet	MAD2L1 binding protein	protein-coding
11805	chr5	150778335	150779693	+	26	NA	intron (NM_032947, intron 1 of 1)	CpG	1068	NM_032947	85027		NM_032947	ENSG00000256235	SMIM3	C5orf62|MST150|NID67	small integral membrane protein 3	protein-coding
14208	chr10	89632624	89634138	+	26	NA	intron (NM_148977, intron 1 of 6)	intron (NM_148977, intron 1 of 6)	10535	NM_148978	53354		NM_138316	ENSG00000152782	PANK1	PANK	pantothenate kinase 1	protein-coding
23464	chr2	157875001	157876541	+	26	NA	promoter-TSS (NM_001347664)	promoter-TSS (NM_001347664)	91	NM_001347664	90		NM_001105	ENSG00000115170	ACVR1	ACTRI|ACVR1A|ACVRLK2|ALK2|FOP|SKR1|TSRI	activin A receptor type 1	protein-coding
9384	chr6	127297330	127298175	+	26	NA	intron (NM_001139510, intron 5 of 5)	MER61F|LTR|ERV1	30888	NM_001242850	81847		NM_030963	ENSG00000118518	RNF146	-	ring finger protein 146	protein-coding
10566	chr1	87327306	87328566	+	26	NA	promoter-TSS (NM_006769)	promoter-TSS (NM_006769)	-944	NM_006769	8543		NM_006769	ENSG00000143013	LMO4	-	LIM domain only 4	protein-coding
19174	chr10	112957223	112960007	+	26	NA	intron (NM_001198530, intron 3 of 10)	intron (NM_001198530, intron 3 of 10)	8365	NM_001198530	6934		NM_030756	ENSG00000148737	TCF7L2	TCF-4|TCF4	transcription factor 7 like 2	protein-coding
9067	chr15	63188908	63189818	+	26	NA	promoter-TSS (NM_016530)	promoter-TSS (NM_016530)	-243	NM_016530	51762		NM_016530	ENSG00000166128	RAB8B	-	RAB8B, member RAS oncogene family	protein-coding
10271	chr20	15814082	15814975	+	26	NA	intron (NM_001351661, intron 8 of 17)	LTR16C|LTR|ERVL	108786	NR_130925	613266		NR_130924	ENSG00000286546	LOC613266	-	uncharacterized LOC613266	ncRNA
10141	chr2	27628364	27629454	+	26	NA	promoter-TSS (NM_001142683)	promoter-TSS (NM_001142683)	-31	NM_001142683	79635		NM_024584	ENSG00000176714	CCDC121	-	coiled-coil domain containing 121	protein-coding
11056	chr4	156961632	156962904	+	26	NA	intron (NR_036641, intron 1 of 6)	intron (NR_036641, intron 1 of 6)	9531	NM_016205	56034		NM_016205	ENSG00000145431	PDGFC	FALLOTEIN|SCDGF	platelet derived growth factor C	protein-coding
16610	chr2	131076879	131078175	+	26	NA	intron (NM_001321743, intron 4 of 8)	ERV3-16A3_LTR|LTR|ERVL	15635	NM_001321747	130074		NM_001009993	ENSG00000152102	FAM168B	MANI	family with sequence similarity 168 member B	protein-coding
11111	chr12	70270691	70271764	+	26	NA	intron (NR_037615, intron 1 of 16)	MLT1L|LTR|ERVL-MaLR	27513	NR_037615	4848		NM_014515	ENSG00000111596	CNOT2	CDC36|HSPC131|IDNADFS|NOT2|NOT2H	CCR4-NOT transcription complex subunit 2	protein-coding
7986-6	chr5	51095366	51096234	+	26	NA	Intergenic	Intergenic	-125613	NR_104653	100287592		NR_104653	ENSG00000251573	LINC02106	-	long intergenic non-protein coding RNA 2106	ncRNA
15353	chr7	75956801	75957854	+	26	NA	intron (NM_001382655, intron 3 of 16)	intron (NM_001382655, intron 3 of 16)	13544	NR_002955	677801		NR_002955	ENSG00000201643	SNORA14A	ACA14a	small nucleolar RNA, H/ACA box 14A	snoRNA
9176	chr5	35185139	35186188	+	26	NA	intron (NM_000949, intron 1 of 9)	intron (NM_000949, intron 1 of 9)	44824	NM_000949	5618		NM_000949	ENSG00000113494	PRLR	HPRL|MFAB|RI-PRLR|hPRLrI	prolactin receptor	protein-coding
7863	chr1	151494463	151495246	+	26	NA	Intergenic	Intergenic	-16533	NM_020770	57530		NM_020770	ENSG00000143375	CGN	-	cingulin	protein-coding
15149	chr3	42731815	42733270	+	26	NA	promoter-TSS (NR_046732)	promoter-TSS (NR_046732)	-33	NR_046732	100874114		NR_046732	ENSG00000173811	CCDC13-AS1	-	CCDC13 antisense RNA 1	ncRNA
14430	chr7	17298217	17299720	+	26	NA	5' UTR (NM_001621, exon 1 of 11)	5' UTR (NM_001621, exon 1 of 11)	316	NM_001621	196		NM_001621	ENSG00000106546	AHR	RP85|bHLHe76	aryl hydrocarbon receptor	protein-coding
13852	chr19	34998790	35000349	+	26	NA	promoter-TSS (NM_001320035)	promoter-TSS (NM_001320035)	-754	NM_001320034	57655		NM_020895	ENSG00000089351	GRAMD1A	KIAA1533	GRAM domain containing 1A	protein-coding
20256	chr1	182299977	182303007	+	26	NA	intron (NR_104175, intron 2 of 2)	MER58B|DNA|hAT-Charlie	12569	NR_104175	400799		NR_104175		LINC01344	GS1-122H1.2	long intergenic non-protein coding RNA 1344	ncRNA
13104	chr10	16249846	16250889	+	26	NA	Intergenic	LTR5B|LTR|ERVK	-186576	NM_001261836	9317		NM_030664	ENSG00000165983	PTER	HPHRP|RPR-1	phosphotriesterase related	protein-coding
8340	chrX	44950584	44951530	+	26	NA	intron (NM_001291416, intron 2 of 28)	LTR10D|LTR|ERV1	77869	NM_001291415	7403		NM_021140	ENSG00000147050	KDM6A	KABUK2|UTX|bA386N14.2	lysine demethylase 6A	protein-coding
9287	chr4	158768051	158768893	+	26	NA	promoter-TSS (NM_001346043)	promoter-TSS (NM_001346043)	-554	NM_001346043	57600		NM_020840	ENSG00000052795	FNIP2	FNIPL|MAPO1	folliculin interacting protein 2	protein-coding
12517	chr20	50112301	50113511	+	26	NA	intron (NM_001282576, intron 1 of 4)	CpG	244	NM_001257396	7335		NM_021988	ENSG00000244687	UBE2V1	CIR1|CROC-1|CROC1|UBE2V|UEV-1|UEV1|UEV1A	ubiquitin conjugating enzyme E2 V1	protein-coding
18480	chr3	23864833	23866784	+	26	NA	intron (NM_003341, intron 3 of 5)	intron (NM_003341, intron 3 of 5)	-50737	NM_001253379	6138		NM_002948	ENSG00000174748	RPL15	DBA12|EC45|L15|RPL10|RPLY10|RPYL10|eL15	ribosomal protein L15	protein-coding
10367-3	chr9	131349643	131350681	+	26	NA	Intergenic	L2b|LINE|L2	-23489	NM_001384822	84726		NM_013318	ENSG00000288701	PRRC2B	BAT2L|BAT2L1|KIAA0515|LQFBS-1	proline rich coiled-coil 2B	protein-coding
19885	chr15	36940065	36942669	+	26	NA	intron (NR_051953, intron 8 of 11)	intron (NR_051953, intron 8 of 11)	31534	NR_107030	102466875		NR_107030	ENSG00000277202	MIR8063	hsa-mir-8063	microRNA 8063	ncRNA
8795	chr1	154408123	154409407	+	26	NA	intron (NM_001206866, intron 1 of 6)	intron (NM_001206866, intron 1 of 6)	-2201	NR_147855	101928101		NR_147855	ENSG00000228013	IL6R-AS1	-	IL6R antisense RNA 1	ncRNA
8114	chr10	96587164	96587714	+	26	NA	promoter-TSS (NM_020123)	promoter-TSS (NM_020123)	-427	NM_020123	56889		NM_020123	ENSG00000077147	TM9SF3	EP70-P-iso|SMBP	transmembrane 9 superfamily member 3	protein-coding
9508	chr4	124018755	124019279	+	26	NA	Intergenic	Intergenic	244753	NR_027106	285419		NR_027105	ENSG00000249464	LINC01091	-	long intergenic non-protein coding RNA 1091	ncRNA
15461	chr15	57550879	57552575	+	26	NA	Intergenic	Intergenic	-40177	NM_001285900	145781		NM_001018090	ENSG00000137878	GCOM1	GRINL1A|Gcom2|MYZAP|MYZAP-POLR2M|gcom	GCOM1, MYZAP-POLR2M combined locus	protein-coding
12356-2	chr6	56405031	56405780	+	26	NA	Intergenic	Intergenic	-11277	NM_001318752	81578		NM_030820	ENSG00000124749	COL21A1	COLA1L|FP633	collagen type XXI alpha 1 chain	protein-coding
11978	chr19	33022145	33023300	+	26	NA	intron (NM_033103, intron 3 of 14)	intron (NM_033103, intron 3 of 14)	42166	NM_033103	85415		NM_033103	ENSG00000131941	RHPN2	P76RBE|RHOBP	rhophilin Rho GTPase binding protein 2	protein-coding
9839	chr2	87542167	87543376	+	26	NA	Intergenic	Intergenic	72821	NR_146460	112597		NR_024204	ENSG00000222041	CYTOR	C2orf59|LINC00152|NCRNA00152	cytoskeleton regulator RNA	ncRNA
12154	chr11	27395385	27396708	+	26	NA	intron (NM_001346432, intron 1 of 16)	intron (NM_001346432, intron 1 of 16)	-32798	NM_080654	91057		NM_030771	ENSG00000109881	CCDC34	L15|NY-REN-41|RAMA3|SPGF76	coiled-coil domain containing 34	protein-coding
17973	chr17	76548498	76549108	+	26	NA	Intergenic	L1MEc|LINE|L1	8759	NM_001077620	768206		NM_001077620	ENSG00000214140	PRCD	RP36	photoreceptor disc component	protein-coding
7700	chr2	147425019	147425876	+	26	NA	Intergenic	Intergenic	-419070	NM_001278580	92		NM_001616	ENSG00000121989	ACVR2A	ACTRII|ACVR2	activin A receptor type 2A	protein-coding
13031	chr14	55580588	55581641	+	26	NA	intron (NM_001079521, intron 1 of 43)	CpG	907	NM_001271014	3895		NM_004986	ENSG00000126777	KTN1	CG1|KNT|MU-RMS-40.19	kinectin 1	protein-coding
10286	chr8	28386347	28387237	+	26	NA	promoter-TSS (NM_018660)	promoter-TSS (NM_018660)	-332	NM_018660	55893		NM_018660	ENSG00000186918	ZNF395	HDBP-2|HDBP2|HDRF-2|PBF|PRF-1|PRF1|Si-1-8-14	zinc finger protein 395	protein-coding
13257	chr1	36396951	36398224	+	26	NA	intron (NM_032881, intron 1 of 1)	MIRc|SINE|MIR	321	NM_032881	84967		NM_032881	ENSG00000181817	LSM10	MST074|MSTP074	LSM10, U7 small nuclear RNA associated	protein-coding
17323	chr17	58351583	58352979	+	26	NA	promoter-TSS (NM_003168)	promoter-TSS (NM_003168)	-80	NM_003168	6827		NM_003168	ENSG00000213246	SUPT4H1	SPT4|SPT4H|SUPT4H|Supt4a	SPT4 homolog, DSIF elongation factor subunit	protein-coding
10206	chr16	84586696	84587702	+	26	NA	intron (NM_021149, intron 3 of 3)	intron (NM_021149, intron 3 of 3)	30879	NM_021149	23406		NM_021149	ENSG00000103187	COTL1	CLP	coactosin like F-actin binding protein 1	protein-coding
24950	chr17	7235964	7236094	+	26	NA	exon (NM_001284517, exon 4 of 5)	exon (NM_001284517, exon 4 of 5)	-1512	NM_004422	1856		NM_004422	ENSG00000004975	DVL2	-	dishevelled segment polarity protein 2	protein-coding
16395	chr1	58619518	58621039	+	26	NA	Intergenic	Intergenic	-43026	NM_002353	4070		NM_002353	ENSG00000184292	TACSTD2	EGP-1|EGP1|GA733-1|GA7331|GP50|M1S1|TROP2	tumor associated calcium signal transducer 2	protein-coding
26684	chr12	12562183	12564232	+	26	NA	promoter-TSS (NM_030640)	promoter-TSS (NM_030640)	-344	NM_030640	80824		NM_030640	ENSG00000111266	DUSP16	MKP-7|MKP7	dual specificity phosphatase 16	protein-coding
8183	chr2	227338965	227339784	+	26	NA	intron (NM_020194, intron 5 of 10)	MLT1G3|LTR|ERVL-MaLR	10696	NM_001277067	56947		NM_020194	ENSG00000168958	MFF	C2orf33|EMPF2|GL004	mitochondrial fission factor	protein-coding
26349	chr19	56119391	56120861	+	26	NA	intron (NM_001351682, intron 1 of 1)	intron (NM_001351682, intron 1 of 1)	1169	NM_001351682	126208		NM_001002836	ENSG00000142409	ZNF787	TIP20	zinc finger protein 787	protein-coding
19112	chr12	25249616	25250594	+	26	NA	intron (NM_001369786, intron 1 of 5)	intron (NM_001369786, intron 1 of 5)	824	NM_001369787	3845		NM_004985	ENSG00000133703	KRAS	C-K-RAS|C-K-RAS|CFC2|K-RAS2A|K-RAS2B|K-RAS4A|K-RAS4B|K-Ras|K-Ras 2|KI-RAS|KRAS1|KRAS2|NS|NS3|OES|RALD|RASK2|c-Ki-ras|c-Ki-ras2	KRAS proto-oncogene, GTPase	protein-coding
19058	chr10	122112277	122114174	+	26	NA	5' UTR (NM_001291879, exon 1 of 17)	5' UTR (NM_001291879, exon 1 of 17)	340	NM_001291879	10579		NM_006997	ENSG00000138162	TACC2	AZU-1|ECTACC	transforming acidic coiled-coil containing protein 2	protein-coding
10679-2	chr7	121395971	121396734	+	26	NA	promoter-TSS (NM_014888)	promoter-TSS (NM_014888)	16	NM_001040020	10447		NM_014888	ENSG00000196937	FAM3C	GS3786|ILEI	FAM3 metabolism regulating signaling molecule C	protein-coding
18404	chr1	89632267	89634187	+	26	NA	promoter-TSS (NR_033981)	promoter-TSS (NR_033981)	107	NM_032270	84230		NM_032270	ENSG00000171488	LRRC8C	AD158|FAD158	leucine rich repeat containing 8 VRAC subunit C	protein-coding
11134	chr2	17539849	17540985	+	26	NA	promoter-TSS (NM_003385)	promoter-TSS (NM_003385)	-279	NM_001366806	7447		NM_003385	ENSG00000163032	VSNL1	HLP3|HPCAL3|HUVISL1|VILIP|VILIP-1	visinin like 1	protein-coding
13852-2	chr19	35000637	35000639	+	26	NA	intron (NM_001320034, intron 1 of 18)	CpG	315	NM_001136199	57655		NM_020895	ENSG00000089351	GRAMD1A	KIAA1533	GRAM domain containing 1A	protein-coding
13780	chr4	48070769	48072911	+	26	NA	intron (NM_003328, intron 13 of 14)	intron (NM_003328, intron 13 of 14)	55068	NM_207330	152519		NM_207330	ENSG00000163293	NIPAL1	NIPA3|NPAL1|SLC57A3	NIPA like domain containing 1	protein-coding
9898	chr5	125699712	125701017	+	26	NA	Intergenic	Intergenic	207103	NR_109887	101927460		NR_109887	ENSG00000260192	LINC02240	-	long intergenic non-protein coding RNA 2240	ncRNA
11813	chr19	9834578	9835848	+	26	NA	promoter-TSS (NR_038830)	promoter-TSS (NR_038830)	6	NR_038422	5300		NM_006221	ENSG00000127445	PIN1	DOD|UBL5	peptidylprolyl cis/trans isomerase, NIMA-interacting 1	protein-coding
16143	chr20	19888206	19890674	+	26	NA	intron (NM_001242581, intron 1 of 11)	intron (NM_001242581, intron 1 of 11)	2919	NM_001242581	54453		NM_018993	ENSG00000132669	RIN2	MACS|RASSF4	Ras and Rab interactor 2	protein-coding
20113	chr4	120921512	120923233	+	26	NA	intron (NM_001379104, intron 1 of 15)	CpG	354	NM_001379104	11107		NM_018699	ENSG00000138738	PRDM5	BCS2|PFM2	PR/SET domain 5	protein-coding
12879	chr18	7069028	7070150	+	26	NA	intron (NM_005559, intron 3 of 62)	MLT1G|LTR|ERVL-MaLR	48208	NM_005559	284217		NM_005559	ENSG00000101680	LAMA1	LAMA|PTBHS|S-LAM-alpha	laminin subunit alpha 1	protein-coding
16281	chr9	87371365	87373545	+	26	NA	Intergenic	Intergenic	-124773	NM_001288731	1612		NM_004938	ENSG00000196730	DAPK1	DAPK|ROCO3	death associated protein kinase 1	protein-coding
12179	chr4	138103842	138105321	+	26	NA	non-coding (NR_038380, exon 3 of 7)	non-coding (NR_038380, exon 3 of 7)	15567	NR_038380	641364		NR_038380	ENSG00000250033	SLC7A11-AS1	-	SLC7A11 antisense RNA 1	ncRNA
5917-2	chr4	110193494	110194626	+	26	NA	intron (NM_024090, intron 1 of 3)	intron (NM_024090, intron 1 of 3)	4555	NM_001130721	79071		NM_024090	ENSG00000170522	ELOVL6	FACE|FAE|LCE|hELO2	ELOVL fatty acid elongase 6	protein-coding
12005	chr1	61337653	61338651	+	26	NA	intron (NM_001145512, intron 5 of 11)	intron (NM_001145512, intron 5 of 11)	-84634	NR_104180	645030		NR_104180	ENSG00000237853	NFIA-AS1	-	NFIA antisense RNA 1	ncRNA
9344	chr1	56565885	56566711	+	26	NA	intron (NM_003713, intron 1 of 5)	MIR|SINE|MIR	13265	NM_003713	8613		NM_003713	ENSG00000162407	PLPP3	Dri42|LPP3|PAP2B|PPAP2B|VCIP	phospholipid phosphatase 3	protein-coding
12850	chr14	69980133	69981504	+	26	NA	intron (NM_001034852, intron 5 of 11)	intron (NM_001034852, intron 5 of 11)	2685	NR_145786	109623479		NR_145786		SNORD169	-	small nucleolar RNA, C/D box 169	snoRNA
15373	chr13	40880236	40881731	+	26	NA	intron (NR_038259, intron 1 of 5)	LTR2|LTR|ERV1	40767	NR_038258	100616668		NR_038258		TPTE2P5	-	TPTE2 pseudogene 5	pseudo
15416	chr11	114208741	114210475	+	26	NA	intron (NM_001354751, intron 4 of 6)	intron (NM_001354751, intron 4 of 6)	-48198	NM_001372047	4837		NM_006169	ENSG00000166741	NNMT	-	nicotinamide N-methyltransferase	protein-coding
13234	chr1	8570747	8573505	+	26	NA	intron (NM_012102, intron 5 of 23)	L1ME1|LINE|L1	-77213	NR_132752	106632271		NR_132752		SNORD128	ZL43	small nucleolar RNA, C/D box 128	snoRNA
9714	chr4	139848777	139849725	+	26	NA	intron (NM_018717, intron 2 of 4)	intron (NM_018717, intron 2 of 4)	183432	NM_002413	4258		NM_002413	ENSG00000085871	MGST2	GST2|MGST-II	microsomal glutathione S-transferase 2	protein-coding
6695	chr17_KI270729v1_random	943	1884	+	26	NA	NA	(TTCCA)n|Simple_repeat|Simple_repeat	NA	NA
18232	chr20	3795696	3796412	+	26	NA	5' UTR (NM_021873, exon 1 of 16)	5' UTR (NM_021873, exon 1 of 16)	315	NM_004358	994		NM_004358	ENSG00000101224	CDC25B	-	cell division cycle 25B	protein-coding
14428	chr19	44164599	44165531	+	26	NA	promoter-TSS (NM_001146220)	promoter-TSS (NM_001146220)	3	NM_001319089	7769		NM_015919	ENSG00000167380	ZNF226	-	zinc finger protein 226	protein-coding
12387	chr3	60307514	60308482	+	26	NA	intron (NM_001166243, intron 5 of 9)	MIR|SINE|MIR	-227089	NM_001320901	2272		NM_002012	ENSG00000189283	FHIT	AP3Aase|FRA3B	fragile histidine triad diadenosine triphosphatase	protein-coding
12280	chrX	18619895	18621258	+	26	NA	intron (NM_001323289, intron 16 of 17)	intron (NM_001323289, intron 16 of 17)	51532	NM_000330	6247		NM_000330	ENSG00000102104	RS1	RS|XLRS1	retinoschisin 1	protein-coding
18890	chr4	68864185	68866602	+	26	NA	Intergenic	LTR10C|LTR|ERV1	49399	NM_001290091	7365		NM_001075	ENSG00000109181	UGT2B10	UDPGT2B10	UDP glucuronosyltransferase family 2 member B10	protein-coding
8802-2	chr3	49553463	49554514	+	26	NA	promoter-TSS (NM_003458)	promoter-TSS (NM_003458)	378	NR_038866	100132677		NR_038866	ENSG00000226913	BSN-DT	BSN-AS2	BSN divergent transcript	ncRNA
19052	chr15	52294805	52295438	+	26	NA	intron (NM_018728, intron 1 of 40)	intron (NM_018728, intron 1 of 40)	683	NM_018728	55930		NM_018728	ENSG00000128833	MYO5C	-	myosin VC	protein-coding
34884	chr14	100303886	100306184	+	26	NA	intron (NM_001352821, intron 1 of 4)	intron (NM_001352821, intron 1 of 4)	1409	NM_001291814	123096		NM_152333	ENSG00000197119	SLC25A29	C14orf69|CACL|ORNT3	solute carrier family 25 member 29	protein-coding
8949	chrX	104156428	104157369	+	26	NA	5' UTR (NM_001012755, exon 1 of 2)	5' UTR (NM_001012755, exon 1 of 2)	111	NM_001012755	401612		NM_001012755	ENSG00000269743	SLC25A53	MCART6	solute carrier family 25 member 53	protein-coding
7424	chr10	87424487	87425607	+	26	NA	Intergenic	Intergenic	-17347	NR_046091	728218		NR_046091	ENSG00000228055	FAM245A	LINC00864	family with sequence similarity 245 member A	ncRNA
14604	chr5	147831409	147832624	+	26	NA	promoter-TSS (NM_001379610)	promoter-TSS (NM_001379610)	-345	NM_001379610	6690		NM_003122	ENSG00000164266	SPINK1	PCTT|PSTI|Spink3|TATI|TCP	serine peptidase inhibitor Kazal type 1	protein-coding
12928	chr8	119978037	119978829	+	26	NA	intron (NM_001283012, intron 2 of 6)	intron (NM_001283012, intron 2 of 6)	104711	NM_022783	64798		NM_022783	ENSG00000155792	DEPTOR	DEP.6|DEPDC6|hDEPTOR	DEP domain containing MTOR interacting protein	protein-coding
11044	chr8	10838991	10840140	+	26	NA	promoter-TSS (NR_125432)	promoter-TSS (NR_125432)	310	NM_017884	54984		NM_017884	ENSG00000254093	PINX1	Gno1|LPTL|LPTS|Pxr1	PIN2 (TERF1) interacting telomerase inhibitor 1	protein-coding
13808	chr2	179057976	179059179	+	25	NA	Intergenic	Intergenic	-8440	NM_173648	285025		NM_173648	ENSG00000163492	CCDC141	CAMDI	coiled-coil domain containing 141	protein-coding
17823	chr3	124032023	124033574	+	25	NA	Intergenic	Intergenic	-40628	NR_133916	54763		NM_017578	ENSG00000065371	ROPN1	CT91|ODF6|RHPNAP1|ROPN1A|ropporin	rhophilin associated tail protein 1	protein-coding
8759-2	chr7	875872	876620	+	25	NA	promoter-TSS (NM_015949)	promoter-TSS (NM_015949)	-308	NM_015949	51608		NM_015949	ENSG00000239857	GET4	C7orf20|CDG2Y|CEE|CGI-20|TRC35	guided entry of tail-anchored proteins factor 4	protein-coding
10174	chr9	66759328	66760615	+	25	NA	Intergenic	MER89|LTR|ERV1	-140754	NM_001317916	26149		NM_033160	ENSG00000274349	ZNF658	-	zinc finger protein 658	protein-coding
11656-2	chr2	218216670	218217863	+	25	NA	promoter-TSS (NM_005731)	promoter-TSS (NM_005731)	77	NM_152862	10109		NM_005731	ENSG00000163466	ARPC2	ARC34|PNAS-139|PRO2446|p34-Arc	actin related protein 2/3 complex subunit 2	protein-coding
12402	chr1	149558197	149559352	+	25	NA	Intergenic	CpG	-25049	NM_001135789	653598		NM_001135789	ENSG00000288867	PPIAL4C	COAS-2	peptidylprolyl isomerase A like 4C	protein-coding
16898	chr11	61160557	61162678	+	25	NA	promoter-TSS (NM_017966)	promoter-TSS (NM_017966)	-191	NM_017966	55048		NM_017966	ENSG00000167987	VPS37C	-	VPS37C subunit of ESCRT-I	protein-coding
16775-2	chr6	132606995	132609098	+	25	NA	TTS (NR_028511)	TTS (NR_028511)	1256	NR_028511	9288		NM_014627	ENSG00000290584	TAAR3P	GPR57|GPR58|TAAR2|TAAR3	trace amine associated receptor 3, pseudogene	pseudo
11501-2	chr5	139197711	139198774	+	25	NA	intron (NM_001037633, intron 1 of 10)	CpG	126	NM_001037633	64374		NM_022464	ENSG00000120725	SIL1	BAP|MSS|ULG5	SIL1 nucleotide exchange factor	protein-coding
10890	chr5	1567435	1568887	+	25	NA	Intergenic	LTR5B|LTR|ERVK	26370	NR_003263	728609		NR_003263	ENSG00000291055	SDHAP3	SDHACL|SDHAL	SDHA pseudogene 3	pseudo
39865	chr7	27119205	27124216	+	25	NA	promoter-TSS (NR_122069)	promoter-TSS (NR_122069)	-209	NR_122069	285943		NR_122069		HOXA-AS2	HOXA3as	HOXA cluster antisense RNA 2	ncRNA
14160	chr20	59014940	59016667	+	25	NA	Intergenic	Intergenic	-3626	NM_030773	81027		NM_030773	ENSG00000101162	TUBB1	MACTHC1	tubulin beta 1 class VI	protein-coding
11133	chr1	116318214	116319460	+	25	NA	Intergenic	Arthur1B|DNA|hAT-Tip100	-54407	NM_000701	476		NM_000701	ENSG00000163399	ATP1A1	CMT2DD|HOMGSMR2	ATPase Na+/K+ transporting subunit alpha 1	protein-coding
6628-2	chr8	35111360	35112011	+	25	NA	Intergenic	Intergenic	-123790	NM_080872	137970		NM_080872	ENSG00000156687	UNC5D	PRO34692|Unc5h4	unc-5 netrin receptor D	protein-coding
7483-2	chr2	226791136	226792029	+	25	NA	intron (NM_005544, intron 1 of 1)	CpG	8238	NM_005544	3667		NM_005544	ENSG00000169047	IRS1	HIRS-1	insulin receptor substrate 1	protein-coding
16651	chr20	51541030	51542561	+	25	NA	intron (NM_001258292, intron 1 of 9)	intron (NM_001258292, intron 1 of 9)	924	NM_173091	4773		NM_012340	ENSG00000101096	NFATC2	JCOSL|NFAT1|NFATP	nuclear factor of activated T cells 2	protein-coding
14344	chr2	96637585	96638110	+	25	NA	intron (NR_146100, intron 1 of 19)	intron (NR_146100, intron 1 of 19)	144	NR_047658	55683		NM_017991	ENSG00000114982	KANSL3	KIAA1310|NSL3|Rcd1	KAT8 regulatory NSL complex subunit 3	protein-coding
6833	chr1	192700589	192701292	+	25	NA	Intergenic	Intergenic	-15388	NR_039624	100616345		NR_039624	ENSG00000283795	MIR4426	-	microRNA 4426	ncRNA
10554	chr6	118650720	118651668	+	25	NA	intron (NM_001178035, intron 2 of 13)	CpG	397	NM_001042475	387119		NM_206921	ENSG00000111860	CEP85L	C6orf204|LIS10|NY-BR-15|bA57K17.2	centrosomal protein 85 like	protein-coding
10210-2	chr3	3645926	3647221	+	25	NA	Intergenic	LTR2|LTR|ERV1	-152858	NM_001324188	57633		NM_020873	ENSG00000175928	LRRN1	FIGLER3|NLRR-1|NLRR1	leucine rich repeat neuronal 1	protein-coding
12326	chr16	67362726	67364599	+	25	NA	exon (NM_018296, exon 6 of 14)	exon (NM_018296, exon 6 of 14)	16307	NM_001161575	55282		NM_018296	ENSG00000159708	LRRC36	RORBP70|XLHSRF2	leucine rich repeat containing 36	protein-coding
13001	chr10	101587574	101588696	+	25	NA	promoter-TSS (NM_001329744)	promoter-TSS (NM_001329744)	122	NM_001174084	27343		NM_013274	ENSG00000166169	POLL	BETAN|POLKAPPA	DNA polymerase lambda	protein-coding
60237-2	chr1_KI270762v1_alt	206590	211139	+	25	NA	intron (NM_001242672, intron 4 of 6)	intron (NM_001242672, intron 4 of 6)	-24661	NM_033467	79258		NM_033467	ENSG00000142606	MMEL1	MMEL2|NEP2|NEPII|NL1|NL2|SEP	membrane metalloendopeptidase like 1	protein-coding
16780	chr20	6696619	6698764	+	25	NA	Intergenic	LTR33|LTR|ERVL	38445	NR_146909	105372516		NR_146909		LINC01713	-	long intergenic non-protein coding RNA 1713	ncRNA
24838	chr17	27455536	27459662	+	25	NA	intron (NM_001367810, intron 1 of 18)	intron (NM_001367810, intron 1 of 18)	1151	NM_001367810	8844		NM_014238	ENSG00000141068	KSR1	KSR|RSU2	kinase suppressor of ras 1	protein-coding
10493	chr1	8862866	8863999	+	25	NA	intron (NM_001428, intron 9 of 11)	intron (NM_001428, intron 9 of 11)	3158	NR_106786	102465436		NR_106786	ENSG00000274258	MIR6728	hsa-mir-6728	microRNA 6728	ncRNA
8950	chr16	59356484	59357408	+	25	NA	Intergenic	Intergenic	398245	NR_028471	644649		NR_028471		APOOP5	-	apolipoprotein O pseudogene 5	pseudo
11703	chr12	71195339	71196320	+	25	NA	Intergenic	Intergenic	-37830	NM_004616	7103		NM_004616	ENSG00000127324	TSPAN8	CO-029|TM4SF3	tetraspanin 8	protein-coding
10555	chr5	169421765	169422924	+	25	NA	Intergenic	Intergenic	-121205	NM_001271946	6586		NM_003062	ENSG00000184347	SLIT3	MEGF5|SLIL2|SLIT1|Slit-3|slit2	slit guidance ligand 3	protein-coding
11986	chr3	185785693	185787015	+	25	NA	intron (NM_006548, intron 2 of 15)	LTR7|LTR|ERV1	-18450	NR_049838	100847078		NR_049838	ENSG00000265470	MIR548AQ	-	microRNA 548aq	ncRNA
18244-2	chr4	1014097	1016145	+	25	NA	intron (NM_001370296, intron 2 of 6)	intron (NM_001370296, intron 2 of 6)	2657	NM_021923	53834		NM_017862	ENSG00000127418	FGFRL1	FGFR-5|FGFR5|FHFR	fibroblast growth factor receptor like 1	protein-coding
11052	chr12	110199355	110200283	+	25	NA	intron (NR_144949, intron 14 of 18)	intron (NR_144949, intron 14 of 18)	75462	NM_001347946	28981		NM_014055	ENSG00000122970	IFT81	CDV-1|CDV-1R|CDV1|CDV1R|DV1|SRTD19	intraflagellar transport 81	protein-coding
8867	chr11	12824261	12824874	+	25	NA	intron (NM_021961, intron 3 of 12)	intron (NM_021961, intron 3 of 12)	150146	NM_021961	7003		NM_021961	ENSG00000187079	TEAD1	AA|NTEF-1|REF1|TCF-13|TCF13|TEAD-1|TEF-1	TEA domain transcription factor 1	protein-coding
5765	chr12	109948744	109949603	+	25	NA	intron (NM_001330154, intron 13 of 13)	intron (NM_001330154, intron 13 of 13)	47195	NM_057170	9815		NM_014776	ENSG00000139436	GIT2	CAT-2|CAT2|PKL	GIT ArfGAP 2	protein-coding
11367	chr1	39164346	39165479	+	25	NA	intron (NM_012090, intron 1 of 92)	intron (NM_012090, intron 1 of 92)	80745	NM_012090	23499		NM_012090	ENSG00000127603	MACF1	ABP620|ACF7|KIAA0754|LIS9|Lnc-PMIF|MACF|OFC4	microtubule actin crosslinking factor 1	protein-coding
14357	chr7	140988825	140990849	+	25	NA	Intergenic	Intergenic	24842	NM_016071	51650		NM_016071	ENSG00000090263	MRPS33	CGI-139|MRP-S33|PTD003|S33mt|mS33	mitochondrial ribosomal protein S33	protein-coding
14021	chr20	62926273	62927260	+	25	NA	promoter-TSS (NM_001193370)	promoter-TSS (NM_001193370)	-215	NM_080796	11083		NM_022105	ENSG00000101191	DIDO1	BYE1|C20orf158|DATF-1|DATF1|DIDO2|DIDO3|DIO-1|DIO1|dJ885L7.8	death inducer-obliterator 1	protein-coding
25091	chr16	69923663	69925842	+	25	NA	promoter-TSS (NM_199424)	promoter-TSS (NM_199424)	-287	NM_199424	11060		NM_007014	ENSG00000198373	WWP2	AIP2|WWp2-like	WW domain containing E3 ubiquitin protein ligase 2	protein-coding
9221	chr4	2537153	2538297	+	25	NA	intron (NM_001366318, intron 1 of 20)	intron (NM_001366318, intron 1 of 20)	1078	NM_001366318	8603		NM_003704	ENSG00000125386	FAM193A	C4orf8|RES4-22	family with sequence similarity 193 member A	protein-coding
11627	chr17	6853911	6854658	+	25	NA	non-coding (NR_002710, exon 2 of 14)	non-coding (NR_002710, exon 2 of 14)	708	NR_002710	245		NR_002710	ENSG00000291084	ALOX12P2	ALOX12E	arachidonate 12-lipoxygenase pseudogene 2	pseudo
11436	chr14	70358924	70359933	+	25	NA	intron (NM_001202548, intron 3 of 5)	intron (NM_001202548, intron 3 of 5)	255	NM_001204090	51241		NM_016468	ENSG00000133983	COX16	C14orf112|HSPC203|MC4DN22|hCOX16	cytochrome c oxidase assembly factor COX16	protein-coding
11590	chr11	127116870	127117874	+	25	NA	Intergenic	Intergenic	50370	NR_120578	101929473		NR_120578	ENSG00000255087	LOC101929473	-	uncharacterized LOC101929473	ncRNA
27353	chr9	136671708	136672727	+	25	NA	TTS (NM_001012727)	TTS (NM_001012727)	1615	NR_029695	406913		NR_029695	ENSG00000199161	MIR126	MIRN126|miRNA126|mir-126	microRNA 126	ncRNA
7400	chr1	8703314	8703890	+	25	NA	intron (NM_001042681, intron 1 of 22)	intron (NM_001042681, intron 1 of 22)	114038	NM_001042681	473		NM_012102	ENSG00000142599	RERE	ARG|ARP|ATN1L|DNB1|NEDBEH	arginine-glutamic acid dipeptide repeats	protein-coding
8536-2	chr15	84927903	84928908	+	25	NA	intron (NM_001287761, intron 11 of 14)	intron (NM_001287761, intron 11 of 14)	43743	NM_201651	9154		NM_004213	ENSG00000156222	SLC28A1	CNT1|HCNT1|URCTU	solute carrier family 28 member 1	protein-coding
10388	chr15	36947729	36949454	+	25	NA	intron (NR_051953, intron 8 of 11)	intron (NR_051953, intron 8 of 11)	24310	NR_107030	102466875		NR_107030	ENSG00000277202	MIR8063	hsa-mir-8063	microRNA 8063	ncRNA
10579	chr19	18918859	18919874	+	25	NA	promoter-TSS (NR_033677)	promoter-TSS (NR_033677)	21	NM_001330469	11316		NM_007263	ENSG00000105669	COPE	epsilon-COP	COPI coat complex subunit epsilon	protein-coding
10349	chr11	12000967	12002323	+	25	NA	intron (NM_001018057, intron 2 of 6)	intron (NM_001018057, intron 2 of 6)	6994	NM_001018057	27122		NM_013253	ENSG00000050165	DKK3	CRRL|REIC|RIG	dickkopf WNT signaling pathway inhibitor 3	protein-coding
24758	chr4	77817484	77819569	+	25	NA	intron (NM_001365006, intron 1 of 11)	intron (NM_001365006, intron 1 of 11)	538	NM_001365007	246175		NM_144571	ENSG00000138767	CNOT6L	CCR4b	CCR4-NOT transcription complex subunit 6 like	protein-coding
13794	chr7	47356968	47358817	+	25	NA	intron (NM_022748, intron 17 of 30)	intron (NM_022748, intron 17 of 30)	106911	NR_145813	109623468		NR_145813		SNORD151	-	small nucleolar RNA, C/D box 151	snoRNA
13657	chr1	2275558	2276837	+	25	NA	intron (NM_003036, intron 1 of 6)	intron (NM_003036, intron 1 of 6)	47878	NM_003036	6497		NM_003036	ENSG00000157933	SKI	SGS|SKV	SKI proto-oncogene	protein-coding
12053	chr20	17682019	17683190	+	25	NA	promoter-TSS (NM_001365613)	promoter-TSS (NM_001365613)	-362	NM_001042576	6238		NM_004587	ENSG00000125844	RRBP1	ES/130|ES130|RRp|hES|p180	ribosome binding protein 1	protein-coding
10957	chr7	74579979	74580948	+	25	NA	intron (NM_001199207, intron 22 of 26)	intron (NM_001199207, intron 22 of 26)	-15505	NR_162116	113218504		NR_162116		MIR10525	-	microRNA 10525	ncRNA
11639-2	chr3	138174252	138174979	+	25	NA	exon (NM_016216, exon 1 of 8)	exon (NM_016216, exon 1 of 8)	306	NM_016216	51163		NM_016216	ENSG00000138231	DBR1	XGIP	debranching RNA lariats 1	protein-coding
10615	chr13	80070094	80071087	+	25	NA	Intergenic	Intergenic	59513	NR_104138	101515984		NR_104138		LINC01080	TCONS_00021856	long intergenic non-protein coding RNA 1080	ncRNA
10520	chr19	32372540	32374221	+	25	NA	intron (NM_014910, intron 4 of 5)	MLT1G3|LTR|ERVL-MaLR	27770	NM_001136156	22847		NM_014910	ENSG00000168813	ZNF507	Zfp507	zinc finger protein 507	protein-coding
9807	chr2	138544018	138545015	+	25	NA	intron (NM_001001664, intron 1 of 10)	L1PA4|LINE|L1	42746	NM_001001664	339745		NM_001001664	ENSG00000144228	SPOPL	BTBD33	speckle type BTB/POZ protein like	protein-coding
7845	chr12	49514751	49515801	+	25	NA	intron (NR_120663, intron 11 of 14)	intron (NR_120663, intron 11 of 14)	-23754	NM_001314030	23416		NM_012284	ENSG00000135519	KCNH3	BEC1|ELK2|Kv12.2	potassium voltage-gated channel subfamily H member 3	protein-coding
7775-2	chr3	69248252	69249207	+	25	NA	intron (NM_015123, intron 7 of 22)	intron (NM_015123, intron 7 of 22)	-126134	NM_001304418	56203		NM_198271	ENSG00000163380	LMOD3	NEM10	leiomodin 3	protein-coding
10659	chr2	20727969	20728810	+	25	NA	intron (NM_001282723, intron 4 of 5)	intron (NM_001282723, intron 4 of 5)	61245	NM_182828	151449		NM_182828	ENSG00000143869	GDF7	BMP12	growth differentiation factor 7	protein-coding
60237	chr1_KI270762v1_alt	202759	204499	+	25	NA	intron (NM_001242672, intron 4 of 6)	intron (NM_001242672, intron 4 of 6)	-19426	NM_033467	79258		NM_033467	ENSG00000142606	MMEL1	MMEL2|NEP2|NEPII|NL1|NL2|SEP	membrane metalloendopeptidase like 1	protein-coding
11756	chr14	77799997	77800621	+	25	NA	intron (NR_158988, intron 1 of 10)	CpG	200	NM_001366490	57143		NM_020421	ENSG00000063761	ADCK1	MCP2	aarF domain containing kinase 1	protein-coding
10313	chr1	59856493	59857528	+	25	NA	intron (NM_015888, intron 12 of 21)	L1MB7|LINE|L1	42061	NM_015888	51361		NM_015888	ENSG00000134709	HOOK1	HK1	hook microtubule tethering protein 1	protein-coding
12813-2	chr4	140048415	140049817	+	25	NA	intron (NM_018717, intron 1 of 4)	intron (NM_018717, intron 1 of 4)	-78899	NR_147610	101927516		NR_147610		LOC101927516	-	uncharacterized LOC101927516	ncRNA
13147-2	chr17	14069031	14070292	+	25	NA	promoter-TSS (NR_049718)	promoter-TSS (NR_049718)	157	NM_001303	1352		NM_001303	ENSG00000006695	COX10	MC4DN3	cytochrome c oxidase assembly factor heme A:farnesyltransferase COX10	protein-coding
6193	chr13	71712919	71713608	+	25	NA	intron (NM_001366712, intron 1 of 11)	intron (NM_001366712, intron 1 of 11)	153929	NM_080760	1602		NM_004392	ENSG00000276644	DACH1	DACH	dachshund family transcription factor 1	protein-coding
11400	chr3	100002527	100003860	+	25	NA	intron (NM_182909, intron 1 of 5)	intron (NM_182909, intron 1 of 5)	-38795	NR_037486	100500859		NR_037486	ENSG00000264897	MIR3921	-	microRNA 3921	ncRNA
17000	chr11	129894885	129896280	+	25	NA	promoter-TSS (NM_001143835)	promoter-TSS (NM_001143835)	-4	NM_001143835	4798		NM_006165	ENSG00000170322	NFRKB	INO80G	nuclear factor related to kappaB binding protein	protein-coding
35100	chr20	51746822	51748264	+	25	NA	intron (NM_006045, intron 1 of 27)	intron (NM_006045, intron 1 of 27)	20847	NM_006045	10079		NM_006045	ENSG00000054793	ATP9A	ATPIIA|NEDGBA	ATPase phospholipid transporting 9A (putative)	protein-coding
9332-2	chr6	52352368	52353146	+	25	NA	Intergenic	L2c|LINE|L2	-9394	NM_133367	85315		NM_133367	ENSG00000170915	PAQR8	C6orf33|LMPB1|MPRB	progestin and adipoQ receptor family member 8	protein-coding
13938	chr6	100880588	100882173	+	25	NA	promoter-TSS (NM_022091)	promoter-TSS (NM_022091)	-8	NM_022091	10973		NM_006828	ENSG00000112249	ASCC3	ASC1p200|HELIC1|MRT81|RNAH	activating signal cointegrator 1 complex subunit 3	protein-coding
12068	chr13	30832866	30834466	+	25	NA	Intergenic	AluSq|SINE|Alu	30460	NR_047012	100874158		NR_047012	ENSG00000237879	LINC00398	-	long intergenic non-protein coding RNA 398	ncRNA
7947	chr6	132612253	132613348	+	25	NA	Intergenic	Intergenic	-3498	NR_028511	9288		NM_014627	ENSG00000290584	TAAR3P	GPR57|GPR58|TAAR2|TAAR3	trace amine associated receptor 3, pseudogene	pseudo
11996	chr18	2518327	2519066	+	25	NA	Intergenic	Intergenic	52809	NM_022840	64863		NM_022840	ENSG00000101574	METTL4	HsT661	methyltransferase 4, N6-adenosine	protein-coding
8462	chr2	73113025	73113714	+	25	NA	promoter-TSS (NM_015470)	promoter-TSS (NM_015470)	-421	NM_015470	26056		NM_015470	ENSG00000135631	RAB11FIP5	GAF1|RIP11|gaf-1|pp75|rab11-FIP5	RAB11 family interacting protein 5	protein-coding
15076	chr2	227765072	227767338	+	25	NA	Intergenic	Intergenic	-47637	NM_004591	6364		NM_004591	ENSG00000115009	CCL20	CKb4|Exodus|LARC|MIP-3-alpha|MIP-3a|MIP3A|SCYA20|ST38	C-C motif chemokine ligand 20	protein-coding
9697	chr18	79457998	79459381	+	25	NA	intron (NM_172389, intron 6 of 9)	CpG	58390	NM_172387	4772		NM_006162	ENSG00000131196	NFATC1	NF-ATC|NF-ATc1.2|NFAT2|NFATc	nuclear factor of activated T cells 1	protein-coding
10703	chr10	18627496	18628285	+	25	NA	intron (NM_001351118, intron 1 of 8)	L1PA3|LINE|L1	23697	NM_182543	221078		NM_182543	ENSG00000241058	NSUN6	4933414E04Rik|ARL5B-AS1|MRT82|NOPD1	NOP2/Sun RNA methyltransferase 6	protein-coding
29290	chr4	49141081	49142991	+	25	NA	Intergenic	(TCCAT)n|Simple_repeat|Simple_repeat	155394	NM_001286791	80157		NM_025087	ENSG00000109182	CWH43	CWH43-C|PGAP2IP	cell wall biogenesis 43 C-terminal homolog	protein-coding
23265	chr17	42677047	42678819	+	25	NA	promoter-TSS (NR_073573)	promoter-TSS (NR_073573)	-939	NM_024927	79990		NM_024927	ENSG00000068137	PLEKHH3	-	pleckstrin homology, MyTH4 and FERM domain containing H3	protein-coding
11602	chr7	95420839	95422050	+	25	NA	intron (NM_001018161, intron 2 of 8)	L3|LINE|CR1	13584	NM_000305	5445		NM_000305	ENSG00000105854	PON2	-	paraoxonase 2	protein-coding
10015	chr7	17132019	17132827	+	25	NA	Intergenic	MLT1D|LTR|ERVL-MaLR	-166229	NM_001621	196		NM_001621	ENSG00000106546	AHR	RP85|bHLHe76	aryl hydrocarbon receptor	protein-coding
9687	chr4	95220150	95221486	+	25	NA	intron (NM_003728, intron 7 of 15)	intron (NM_003728, intron 7 of 15)	129327	NM_001256794	658		NM_001203	ENSG00000138696	BMPR1B	ALK-6|ALK6|AMD3|AMDD|BDA1D|BDA2|CDw293	bone morphogenetic protein receptor type 1B	protein-coding
60237-3	chr1_KI270762v1_alt	214043	216157	+	25	NA	intron (NM_001242672, intron 4 of 6)	intron (NM_001242672, intron 4 of 6)	-30897	NM_033467	79258		NM_033467	ENSG00000142606	MMEL1	MMEL2|NEP2|NEPII|NL1|NL2|SEP	membrane metalloendopeptidase like 1	protein-coding
9167	chr9	104993282	104994153	+	25	NA	Intergenic	Intergenic	-65562	NM_005502	19		NM_005502	ENSG00000165029	ABCA1	ABC-1|ABC1|CERP|HDLCQTL13|HDLDT1|HPALP1|TGD	ATP binding cassette subfamily A member 1	protein-coding
16226	chr8	29260661	29260747	+	25	NA	intron (NM_015254, intron 1 of 39)	AluSq2|SINE|Alu	2366	NM_015254	23303		NM_015254	ENSG00000197892	KIF13B	GAKIN	kinesin family member 13B	protein-coding
11525	chr19	47483652	47484918	+	25	NA	promoter-TSS (NR_111923)	promoter-TSS (NR_111923)	3	NR_038452	100505681		NR_038452		NAPA-AS1	-	NAPA antisense RNA 1	ncRNA
11668	chr10	41882856	41884383	+	25	NA	Intergenic	(ATGGA)n|Simple_repeat|Simple_repeat	484426	NR_024380	441666		NR_024380	ENSG00000291065	LOC441666	-	zinc finger protein 91 pseudogene	pseudo
9164	chr2	75667150	75668617	+	25	NA	intron (NM_003203, intron 15 of 16)	intron (NM_003203, intron 15 of 16)	21100	NM_014763	9801		NM_014763	ENSG00000115364	MRPL19	L15mt|L19mt|MRP-L15|MRP-L19|MRPL15|RLX1|RPML15|bL19m	mitochondrial ribosomal protein L19	protein-coding
13223	chr11	79059916	79061102	+	25	NA	intron (NM_001098816, intron 6 of 33)	intron (NM_001098816, intron 6 of 33)	341600	NR_030598	100126333		NR_030598	ENSG00000211997	MIR708	MIRN708|hsa-mir-708	microRNA 708	ncRNA
19228	chr4	85127408	85130452	+	25	NA	Intergenic	LTR22B1|LTR|ERVK	161446	NR_152782	404201		NM_205857	ENSG00000180769	WDFY3-AS2	C4orf12|FBI4|NCRNA00247	WDFY3 antisense RNA 2	ncRNA
11894	chr8	39031983	39032837	+	25	NA	intron (NR_027638, intron 11 of 20)	L1P2|LINE|L1	-13725	NR_145988	109616979		NR_145736	ENSG00000207199	SNORD38D	-	small nucleolar RNA, C/D box 38D	snoRNA
37633	chr19	5913299	5916657	+	25	NA	exon (NM_004058, exon 4 of 5)	exon (NM_004058, exon 4 of 5)	724	NM_004058	828		NM_004058	ENSG00000105519	CAPS	CAPS1	calcyphosine	protein-coding
15755	chr11	3641712	3642931	+	25	NA	promoter-TSS (NR_123732)	promoter-TSS (NR_123732)	-5	NM_001079536	116969		NM_053017	ENSG00000167311	ART5	ARTC5	ADP-ribosyltransferase 5	protein-coding
10060	chr16	1420396	1421446	+	25	NA	promoter-TSS (NM_001272051)	promoter-TSS (NM_001272051)	-174	NM_001272051	283951		NM_001010878	ENSG00000174109	UQCC4	C16orf91|CCSMST1|URLC5|gs103	ubiquinol-cytochrome c reductase complex assembly factor 4	protein-coding
7155	chr11	67119010	67119607	+	25	NA	promoter-TSS (NR_027473)	promoter-TSS (NR_027473)	45	NR_027473	22992		NM_012308	ENSG00000173120	KDM2A	CXXC8|FBL11|FBL7|FBXL11|JHDM1A|LILINA	lysine demethylase 2A	protein-coding
11624	chr1	26432098	26432933	+	25	NA	intron (NM_205861, intron 1 of 8)	intron (NM_205861, intron 1 of 8)	194	NM_205861	79947		NM_024887	ENSG00000117682	DHDDS	CIT|CPT|DEDSM|DS|HDS|RP59|hCIT	dehydrodolichyl diphosphate synthase subunit	protein-coding
14577	chr3	85602521	85603900	+	25	NA	intron (NM_001256503, intron 2 of 9)	intron (NM_001256503, intron 2 of 9)	98594	NM_001256504	253559		NM_153184	ENSG00000175161	CADM2	IGSF4D|NECL3|Necl-3|SynCAM 2|SynCAM-2|synCAM2	cell adhesion molecule 2	protein-coding
14437	chr19	41426079	41427952	+	25	NA	intron (NM_001385648, intron 1 of 1)	intron (NM_001385648, intron 1 of 1)	978	NM_001385648	374907		NM_198540	ENSG00000177191	B3GNT8	B3GALT7|BGALT15|beta3Gn-T8	UDP-GlcNAc:betaGal beta-1,3-N-acetylglucosaminyltransferase 8	protein-coding
19299	chr10	96832260	96834533	+	25	NA	promoter-TSS (NR_135921)	promoter-TSS (NR_135921)	451	NM_032440	84458		NM_015652	ENSG00000196233	LCOR	C10orf12|MLR2	ligand dependent nuclear receptor corepressor	protein-coding
11311	chr18	31820896	31822351	+	25	NA	Intergenic	AluSc5|SINE|Alu	-60743	NM_001034172	147407		NM_001034172	ENSG00000141437	SLC25A52	MCART2	solute carrier family 25 member 52	protein-coding
11647	chr13	33817718	33819110	+	25	NA	intron (NM_002915, intron 1 of 8)	L2a|LINE|L2	265	NM_002915	5983		NM_002915	ENSG00000133119	RFC3	RFC38	replication factor C subunit 3	protein-coding
20242	chr17	64262046	64263295	+	25	NA	intron (NM_001288732, intron 1 of 11)	CpG	590	NM_018469	55852		NM_018469	ENSG00000136478	TEX2	HT008|TMEM96	testis expressed 2	protein-coding
10050	chr17	43231483	43232345	+	25	NA	Intergenic	L2c|LINE|L2	2063	NR_002716	6066		NR_002716	ENSG00000274585	RNU2-1	RNU2|U2	RNA, U2 small nuclear 1	snRNA
11213	chr21	43775650	43776534	+	25	NA	intron (NM_000100, intron 1 of 2)	CpG	216	NM_000100	1476		NM_000100	ENSG00000160213	CSTB	CPI-B|CST6|EPM1|EPM1A|PME|STFB|ULD	cystatin B	protein-coding
11172	chr8	71113112	71114325	+	25	NA	Intergenic	Intergenic	242988	NM_172058	2138		NM_000503	ENSG00000104313	EYA1	BOP|BOR|BOS1|OFC1	EYA transcriptional coactivator and phosphatase 1	protein-coding
12816	chr8	8427062	8428504	+	25	NA	Intergenic	Intergenic	-41344	NR_163138	157285		NM_001080826	ENSG00000275342	PRAG1	NACK|PEAK2|PRAGMIN|SGK223	PEAK1 related, kinase-activating pseudokinase 1	protein-coding
12557	chr14	74762904	74764428	+	25	NA	exon (NM_019589, exon 1 of 21)	exon (NM_019589, exon 1 of 21)	350	NM_019589	56252		NM_019589	ENSG00000119596	YLPM1	C14orf170|PPP1R169|ZAP113|ZAP3	YLP motif containing 1	protein-coding
7493	chr19	47745109	47745845	+	25	NA	promoter-TSS (NM_015710)	promoter-TSS (NM_015710)	-69	NM_015710	29997		NM_015710	ENSG00000105373	NOP53	GLTSCR2|PICT-1|PICT1	NOP53 ribosome biogenesis factor	protein-coding
10744-3	chr7	55065510	55067240	+	25	NA	intron (NM_001346941, intron 1 of 21)	intron (NM_001346941, intron 1 of 21)	-43464	NM_001346900	1956		NM_005228	ENSG00000146648	EGFR	ERBB|ERBB1|ERRP|HER1|NISBD2|PIG61|mENA	epidermal growth factor receptor	protein-coding
14656	chr17	59963989	59965215	+	25	NA	promoter-TSS (NR_110816)	promoter-TSS (NR_110816)	138	NM_016125	51136		NM_016125	ENSG00000189050	RNFT1	PTD016	ring finger protein, transmembrane 1	protein-coding
12279	chr11	447874	449039	+	25	NA	intron (NM_001329548, intron 1 of 11)	intron (NM_001329548, intron 1 of 11)	188	NM_001329548	81490		NM_030783	ENSG00000174915	PTDSS2	PSS2	phosphatidylserine synthase 2	protein-coding
14500	chr22	20936750	20937936	+	25	NA	intron (NR_156180, intron 2 of 3)	intron (NR_156180, intron 2 of 3)	-19749	NR_110537	101928891		NR_110537	ENSG00000237476	LINC01637	-	long intergenic non-protein coding RNA 1637	ncRNA
14871	chr6	8079799	8081455	+	25	NA	intron (NM_004280, intron 3 of 3)	intron (NM_004280, intron 3 of 3)	5906	NR_003703	100124533		NR_003703		SCARNA27	-	small Cajal body-specific RNA 27	ncRNA
10881	chr14	63922709	63923782	+	25	NA	intron (NM_015180, intron 2 of 114)	intron (NM_015180, intron 2 of 114)	70241	NM_182914	23224		NM_015180	ENSG00000054654	SYNE2	EDMD5|KASH2|NUA|NUANCE|Nesp2|Nesprin-2|SYNE-2|TROPH	spectrin repeat containing nuclear envelope protein 2	protein-coding
24826	chr11	69435675	69436064	+	25	NA	Intergenic	Intergenic	10214	NM_001319657	102724265		NM_001319657	ENSG00000255980	LINC02953	-	long intergenic non-protein coding RNA 2953	ncRNA
11244	chr13	60157768	60159060	+	25	NA	intron (NM_001042517, intron 1 of 27)	intron (NM_001042517, intron 1 of 27)	5514	NM_001258368	81624		NM_030932	ENSG00000139734	DIAPH3	AN|AUNA1|DIA2|DRF3|NSDAN|diap3|mDia2	diaphanous related formin 3	protein-coding
7726	chr6	137353746	137354535	+	25	NA	Intergenic	Intergenic	-134755	NM_000416	3459		NM_000416	ENSG00000027697	IFNGR1	CD119|IFNGR|IMD27A|IMD27B	interferon gamma receptor 1	protein-coding
16646	chr11_KI270831v1_alt	221721	223141	+	25	NA	promoter-TSS (NM_001369388)	promoter-TSS (NM_001369388)	-258	NM_001369379	4676		NM_005969	ENSG00000205531	NAP1L4	NAP1L4b|NAP2|NAP2L|hNAP2	nucleosome assembly protein 1 like 4	protein-coding
25091-2	chr16	69926981	69927788	+	25	NA	intron (NM_199424, intron 1 of 13)	MIR3|SINE|MIR	2345	NM_199424	11060		NM_007014	ENSG00000198373	WWP2	AIP2|WWp2-like	WW domain containing E3 ubiquitin protein ligase 2	protein-coding
17210	chr16	647928	649428	+	25	NA	promoter-TSS (NM_145294)	promoter-TSS (NM_145294)	635	NR_135177	105371038		NR_135177		LOC105371038	-	uncharacterized LOC105371038	ncRNA
12448	chr21	15121292	15122873	+	25	NA	Intergenic	Intergenic	-57082	NM_003489	8204		NM_003489	ENSG00000180530	NRIP1	CAKUT3|RIP140	nuclear receptor interacting protein 1	protein-coding
18743	chr14	61536253	61538372	+	25	NA	intron (NM_006255, intron 12 of 13)	intron (NM_006255, intron 12 of 13)	32882	NR_110417	101927780		NR_110416	ENSG00000250548	LINC01303	-	long intergenic non-protein coding RNA 1303	ncRNA
21143	chr3	179147262	179149708	+	25	NA	promoter-TSS (NR_125401)	promoter-TSS (NR_125401)	128	NM_006218	5290		NM_006218	ENSG00000121879	PIK3CA	CCM4|CLAPO|CLOVE|CWS5|HMH|MCAP|MCM|MCMTC|PI3K|PI3K-alpha|p110-alpha	phosphatidylinositol-4,5-bisphosphate 3-kinase catalytic subunit alpha	protein-coding
12338	chr22_KI270879v1_alt	277961	279499	+	25	NA	promoter-TSS (NM_001293807)	promoter-TSS (NM_001293807)	-244	NM_000853	2952		NM_000853		GSTT1	-	glutathione S-transferase theta 1	protein-coding
14021-2	chr20	62927660	62927680	+	25	NA	intron (NM_022105, intron 1 of 5)	intron (NM_022105, intron 1 of 5)	-1119	NM_080796	11083		NM_022105	ENSG00000101191	DIDO1	BYE1|C20orf158|DATF-1|DATF1|DIDO2|DIDO3|DIO-1|DIO1|dJ885L7.8	death inducer-obliterator 1	protein-coding
18636	chr12	111597170	111598659	+	24	NA	intron (NM_001310121, intron 1 of 25)	CpG	1401	NM_002973	6311		NM_002973	ENSG00000204842	ATXN2	ATX2|SCA2|TNRC13	ataxin 2	protein-coding
10679	chr2	112645316	112646210	+	24	NA	promoter-TSS (NM_005415)	promoter-TSS (NM_005415)	-176	NM_005415	6574		NM_005415	ENSG00000144136	SLC20A1	GLVR1|Glvr-1|PIT1|PiT-1	solute carrier family 20 member 1	protein-coding
10621	chr9	134136345	134137378	+	24	NA	5' UTR (NM_001384412, exon 1 of 14)	5' UTR (NM_001384412, exon 1 of 14)	440	NM_001384411	11091		NM_017588	ENSG00000196363	WDR5	BIG-3|BIG3|CFAP89|SWD3	WD repeat domain 5	protein-coding
10758	chr16	19742802	19744106	+	24	NA	intron (NR_130967, intron 5 of 7)	intron (NR_130967, intron 5 of 7)	-25227	NM_001348530	400506		NM_001012991	ENSG00000103550	KNOP1	101F10.1|C16orf88|FAM191A|TSG118	lysine rich nucleolar protein 1	protein-coding
8794	chr7	139776370	139777342	+	24	NA	intron (NM_022740, intron 1 of 14)	intron (NM_022740, intron 1 of 14)	1142	NM_001113239	28996		NM_022740	ENSG00000064393	HIPK2	PRO0593	homeodomain interacting protein kinase 2	protein-coding
11066	chr5	11506805	11508038	+	24	NA	intron (NM_001332, intron 3 of 21)	intron (NM_001332, intron 3 of 21)	81496	NM_001288715	1501		NM_001332	ENSG00000169862	CTNND2	GT24|NPRAP	catenin delta 2	protein-coding
13188	chr18	74326098	74328038	+	24	NA	intron (NM_001174123, intron 4 of 13)	PABL_A|LTR|ERV1	11229	NM_001174123	644041		NM_001174123	ENSG00000206043	C18orf63	DKFZP781G0119	chromosome 18 open reading frame 63	protein-coding
27474	chr21	8205435	8208028	+	24	NA	non-coding (NR_146144, exon 1 of 1)	non-coding (NR_146144, exon 1 of 1)	743	NR_146144	109864279		NR_146144		RNA45SN2	-	RNA, 45S pre-ribosomal N2	rRNA
11338	chrX	119574090	119575491	+	24	NA	intron (NM_001282161, intron 1 of 5)	CpG	227	NM_001282161	7319		NM_003336	ENSG00000077721	UBE2A	HHR6A|MRXS30|MRXSN|RAD6A|UBC2	ubiquitin conjugating enzyme E2 A	protein-coding
15293	chr19	32345204	32346813	+	24	NA	intron (NM_014910, intron 1 of 5)	intron (NM_014910, intron 1 of 5)	398	NM_001136156	22847		NM_014910	ENSG00000168813	ZNF507	Zfp507	zinc finger protein 507	protein-coding
25838	chr4	183097333	183099387	+	24	NA	promoter-TSS (NM_024949)	promoter-TSS (NM_024949)	839	NR_024008	152641		NM_153008	ENSG00000251359	WWC2-AS2	C4orf38	WWC2 antisense RNA 2	ncRNA
8952	chr16	23595616	23596669	+	24	NA	exon (NM_005003, exon 1 of 5)	exon (NM_005003, exon 1 of 5)	174	NM_005003	4706		NM_005003	ENSG00000004779	NDUFAB1	ACP|ACP1|FASN2A|SDAP	NADH:ubiquinone oxidoreductase subunit AB1	protein-coding
17606	chr17	75351511	75352713	+	24	NA	intron (NM_203506, intron 2 of 4)	intron (NM_203506, intron 2 of 4)	53566	NM_002086	2885		NM_002086	ENSG00000177885	GRB2	ASH|EGFRBP-GRB2|Grb3-3|MST084|MSTP084|NCKAP2	growth factor receptor bound protein 2	protein-coding
20100	chrX	71223964	71225586	+	24	NA	3' UTR (NM_001097642, exon 2 of 2)	3' UTR (NM_001097642, exon 2 of 2)	1551	NM_000166	2705		NM_000166	ENSG00000169562	GJB1	CMTX|CMTX1|CX32	gap junction protein beta 1	protein-coding
8082-2	chr8	41604000	41605001	+	24	NA	intron (NM_178819, intron 2 of 12)	intron (NM_178819, intron 2 of 12)	25984	NM_001363197	137964		NM_178819	ENSG00000158669	GPAT4	1-AGPAT 6|AGPAT6|LPAAT-zeta|LPAATZ|TSARG7	glycerol-3-phosphate acyltransferase 4	protein-coding
11617	chr1	35078879	35080203	+	24	NA	intron (NM_001319955, intron 1 of 8)	CpG	156	NM_024772	79830		NM_024772	ENSG00000197056	ZMYM1	MYM	zinc finger MYM-type containing 1	protein-coding
18016	chr5	14148660	14149486	+	24	NA	intron (NR_134469, intron 1 of 56)	intron (NR_134469, intron 1 of 56)	5731	NM_007118	7204		NM_007118	ENSG00000038382	TRIO	ARHGEF23|MEBAS|MRD44|MRD63|tgat	trio Rho guanine nucleotide exchange factor	protein-coding
18441	chr11	117098350	117100018	+	24	NA	promoter-TSS (NM_001281749)	promoter-TSS (NM_001281749)	-756	NM_001366687	23387		NM_025164	ENSG00000160584	SIK3	L19|QSK|SEMDK|SIK-3	SIK family kinase 3	protein-coding
8672	chr10	51918706	51920088	+	24	NA	intron (NM_001098512, intron 5 of 17)	intron (NM_001098512, intron 5 of 17)	-127359	NM_001374781	5592		NM_006258	ENSG00000185532	PRKG1	AAT8|PKG|PKG1|PRKG1B|PRKGR1B|cGK|cGK 1|cGK1|cGKI|cGKI-BETA|cGKI-alpha	protein kinase cGMP-dependent 1	protein-coding
11736	chr17	27352900	27353910	+	24	NA	Intergenic	MER5A|DNA|hAT-Charlie	59291	NM_001348350	26118		NM_015626	ENSG00000109046	WSB1	SWIP1|WSB-1	WD repeat and SOCS box containing 1	protein-coding
13058	chr20	51768741	51769860	+	24	NA	promoter-TSS (NM_006045)	promoter-TSS (NM_006045)	-910	NM_006045	10079		NM_006045	ENSG00000054793	ATP9A	ATPIIA|NEDGBA	ATPase phospholipid transporting 9A (putative)	protein-coding
8622-2	chr22	40711267	40712195	+	24	NA	Intergenic	LTR81A|LTR|Gypsy	32247	NM_005297	2847		NM_005297	ENSG00000128285	MCHR1	GPR24|MCH-1R|MCH1R|SLC-1|SLC1	melanin concentrating hormone receptor 1	protein-coding
30776	chr4	78565302	78569842	+	24	NA	intron (NM_005139, intron 2 of 12)	MER34B|LTR|ERV1	15802	NM_005139	306		NM_005139	ENSG00000138772	ANXA3	ANX3	annexin A3	protein-coding
10298	chr11	67482560	67484123	+	24	NA	promoter-TSS (NM_001302959)	promoter-TSS (NM_001302959)	-175	NM_001302959	9049		NM_003977	ENSG00000110711	AIP	ARA9|FKBP16|FKBP37|PITA1|SMTPHN|XAP-2|XAP2	aryl hydrocarbon receptor interacting protein	protein-coding
11185	chr8	94895366	94896261	+	24	NA	promoter-TSS (NM_001354522)	promoter-TSS (NM_001354522)	14	NR_148905	137682		NM_152416	ENSG00000156170	NDUFAF6	C8orf38|FRTS5|MC1DN17	NADH:ubiquinone oxidoreductase complex assembly factor 6	protein-coding
23584	chr2	101818108	101819230	+	24	NA	intron (NM_001384572, intron 2 of 29)	intron (NM_001384572, intron 2 of 29)	120404	NM_001384556	9448		NM_004834	ENSG00000071054	MAP4K4	FLH21957|HEL-S-31|HGK|MEKKK4|NIK	mitogen-activated protein kinase kinase kinase kinase 4	protein-coding
9156	chr3	178507410	178508400	+	24	NA	Intergenic	Intergenic	-28531	NM_181361	10242		NM_005832	ENSG00000197584	KCNMB2	-	potassium calcium-activated channel subfamily M regulatory beta subunit 2	protein-coding
20769	chr5	177300127	177301616	+	24	NA	TTS (NM_001365684)	TTS (NM_001365684)	2848	NM_001031677	53917		NM_130781	ENSG00000169228	RAB24	-	RAB24, member RAS oncogene family	protein-coding
22133	chr3	56800359	56802379	+	24	NA	intron (NM_001289698, intron 2 of 10)	intron (NM_001289698, intron 2 of 10)	580	NM_019555	50650		NM_019555	ENSG00000163947	ARHGEF3	GEF3|STA3|XPLN	Rho guanine nucleotide exchange factor 3	protein-coding
5828	chr1	143230038	143230647	+	24	NA	Intergenic	Intergenic	192250	NR_027354	645166		NR_027354	ENSG00000288905	LSP1P5	-	LSP1 pseudogene 5	pseudo
11509	chr14	103819344	103820543	+	24	NA	intron (NM_015316, intron 1 of 16)	MIRb|SINE|MIR	27632	NM_015316	23368		NM_015316	ENSG00000088808	PPP1R13B	ASPP1|p53BP2-like|p85	protein phosphatase 1 regulatory subunit 13B	protein-coding
11930-2	chr12	119669484	119670560	+	24	NA	intron (NM_006253, intron 1 of 6)	intron (NM_006253, intron 1 of 6)	1889	NM_006253	5564		NM_006253	ENSG00000111725	PRKAB1	AMPK|HAMPKb	protein kinase AMP-activated non-catalytic subunit beta 1	protein-coding
11049	chr3	76873236	76874344	+	24	NA	intron (NM_001378194, intron 1 of 27)	intron (NM_001378194, intron 1 of 27)	-166309	NM_001378193	6092		NM_002942	ENSG00000185008	ROBO2	SAX3	roundabout guidance receptor 2	protein-coding
7347	chr1	200411328	200412603	+	24	NA	Intergenic	MER21B|LTR|ERVL	-1929	NM_001281294	23528		NM_012482	ENSG00000162702	ZNF281	GZP1|ZBP-99|ZBP99|ZNP-99	zinc finger protein 281	protein-coding
7028-2	chr21	33479989	33480685	+	24	NA	promoter-TSS (NR_040016)	promoter-TSS (NR_040016)	-328	NR_040016	757		NM_006134	ENSG00000142188	TMEM50B	C21orf4|HCVP7TP3	transmembrane protein 50B	protein-coding
16944	chr17	43238881	43240159	+	24	NA	TTS (NR_002716).2	TTS (NR_002716).2	591	NR_002716	6066		NR_002716	ENSG00000274585	RNU2-1	RNU2|U2	RNA, U2 small nuclear 1	snRNA
11591	chr20	46708922	46710387	+	24	NA	promoter-TSS (NM_030777)	promoter-TSS (NM_030777)	5	NM_030777	81031		NM_030777	ENSG00000197496	SLC2A10	ATORS|ATS|GLUT10	solute carrier family 2 member 10	protein-coding
10744-2	chr7	35037767	35038558	+	24	NA	promoter-TSS (NM_001366673)	promoter-TSS (NM_001366673)	-121	NM_015283	23333		NM_015283	ENSG00000173852	DPY19L1	-	dpy-19 like C-mannosyltransferase 1	protein-coding
6311	chr10	32378288	32379050	+	24	NA	promoter-TSS (NM_001382754)	promoter-TSS (NM_001382754)	100	NR_168508	80314		NM_025209	ENSG00000120616	EPC1	Epl1	enhancer of polycomb homolog 1	protein-coding
11574	chr1	47947451	47948749	+	24	NA	intron (NM_001194986, intron 2 of 6)	intron (NM_001194986, intron 2 of 6)	49285	NM_001194986	388630		NM_001194986	ENSG00000269113	TRABD2B	TIKI2	TraB domain containing 2B	protein-coding
12040	chr2	129074015	129075206	+	24	NA	Intergenic	ERV24_Prim-int|LTR|ERV1	199281	NR_122042	151121		NM_001033657	ENSG00000204460	LINC01854	-	long intergenic non-protein coding RNA 1854	ncRNA
9515-2	chr3	23945869	23946670	+	24	NA	intron (NM_001145425, intron 1 of 7)	CpG	148	NM_001145425	9975		NM_005126	ENSG00000174738	NR1D2	BD73|EAR-1R|REVERBB|REVERBbeta|RVR	nuclear receptor subfamily 1 group D member 2	protein-coding
13628-2	chr10	83542257	83543847	+	24	NA	Intergenic	Intergenic	134037	NR_134317	105378397		NR_134317	ENSG00000233945	LINC02650	-	long intergenic non-protein coding RNA 2650	ncRNA
8429-2	chr7	157157989	157159118	+	24	NA	intron (NM_014671, intron 1 of 22)	intron (NM_014671, intron 1 of 22)	19627	NM_014671	9690		NM_014671	ENSG00000009335	UBE3C	HECTH2|NDSMBA|NEDSMBA|RAUL	ubiquitin protein ligase E3C	protein-coding
9327	chr6	62980266	62981147	+	24	NA	Intergenic	L1MEc|LINE|L1	339271	NM_001143940	51557		NM_016571	ENSG00000146166	LGSN	GLULD1|LGS	lengsin, lens protein with glutamine synthetase domain	protein-coding
15028	chrY	2837042	2838615	+	24	NA	Intergenic	PABL_A|LTR|ERV1	-3774	NM_001008	6192		NM_001008	ENSG00000129824	RPS4Y1	RPS4Y|S4	ribosomal protein S4 Y-linked 1	protein-coding
8023	chr9	110971769	110972481	+	24	NA	5' UTR (NM_001351414, exon 4 of 6)	5' UTR (NM_001351414, exon 4 of 6)	64655	NM_001351420	1902		NM_001401	ENSG00000198121	LPAR1	EDG2|Gpcr26|LPA1|Mrec1.3|VZG1|edg-2|rec.1.3|vzg-1	lysophosphatidic acid receptor 1	protein-coding
9702	chr20	6659764	6661199	+	24	NA	Intergenic	Intergenic	75655	NR_146909	105372516		NR_146909		LINC01713	-	long intergenic non-protein coding RNA 1713	ncRNA
15831-2	chr8	79827161	79828291	+	24	NA	intron (NR_110954, intron 2 of 5)	intron (NR_110954, intron 2 of 5)	44011	NR_110954	101927040		NR_110954	ENSG00000249328	LOC101927040	-	uncharacterized LOC101927040	ncRNA
9027-2	chr7	123532372	123533188	+	24	NA	5' UTR (NM_001282855, exon 1 of 13)	5' UTR (NM_001282855, exon 1 of 13)	168	NR_104244	154865		NM_178827	ENSG00000164675	IQUB	TRS4	IQ motif and ubiquitin domain containing	protein-coding
12148	chr8	42270650	42272168	+	24	NA	promoter-TSS (NR_125823)	promoter-TSS (NR_125823)	107	NM_001556	3551		NM_001556	ENSG00000104365	IKBKB	IKK-2|IKK-beta|IKK2|IKKB|IMD15|IMD15A|IMD15B|NFKBIKB	inhibitor of nuclear factor kappa B kinase subunit beta	protein-coding
6003	chr10	47619365	47619883	+	24	NA	Intergenic	Intergenic	-36205	NR_033407	1517		NR_033407		CTSLP2	CTSL1P2|CTSL1P5|CTSL1P7|CTSLL2|CTSLL5|CTSLL7|CTSLP5|CTSLP7|bA144G6.6|bA342C24.4	cathepsin L pseudogene 2	pseudo
12109	chr6	14309587	14311589	+	24	NA	Intergenic	L2a|LINE|L2	-25134	NR_108097	102216342		NR_108096	ENSG00000226673	LINC01108	LncRNA-ES1	long intergenic non-protein coding RNA 1108	ncRNA
13015	chr8	119855169	119856567	+	24	NA	promoter-TSS (NM_024094)	promoter-TSS (NM_024094)	26	NM_024094	79075		NM_024094	ENSG00000136982	DSCC1	DCC1	DNA replication and sister chromatid cohesion 1	protein-coding
27158	chr11	69007478	69010373	+	24	NA	intron (NM_001098515, intron 2 of 2)	intron (NM_001098515, intron 2 of 2)	-3429	NR_120541	101928200		NR_120541	ENSG00000256508	MRGPRF-AS1	-	MRGPRF antisense RNA 1	ncRNA
16761	chr13	95270466	95272023	+	24	NA	intron (NM_001301830, intron 1 of 19)	intron (NM_001301830, intron 1 of 19)	30207	NM_001105515	10257		NM_005845	ENSG00000125257	ABCC4	MOAT-B|MOATB|MRP4	ATP binding cassette subfamily C member 4 (PEL blood group)	protein-coding
14043	chr20	53642320	53643809	+	24	NA	Intergenic	Intergenic	34710	NR_134576	105372672		NR_134576	ENSG00000235415	LOC105372672	-	uncharacterized LOC105372672	ncRNA
8557	chr15	78850670	78851544	+	24	NA	Intergenic	Intergenic	-21674	NM_206839	10933		NM_006791	ENSG00000185787	MORF4L1	Eaf3|FWP006|HsT17725|MEAF3|MORFRG15|MRG15|S863-6	mortality factor 4 like 1	protein-coding
7447	chr4	37408216	37408726	+	24	NA	intron (NM_001144990, intron 3 of 6)	L1PA7|LINE|L1	-45454	NM_001104629	55286		NM_018302	ENSG00000154274	C4orf19	-	chromosome 4 open reading frame 19	protein-coding
29353	chr1	213374086	213376211	+	24	NA	Intergenic	Intergenic	323907	NM_012424	26750		NM_012424	ENSG00000136643	RPS6KC1	RPK118|RSKL1|S6K-delta-1|S6PKh1|humS6PKh1	ribosomal protein S6 kinase C1	protein-coding
32093	chr18	3593050	3596212	+	24	NA	intron (NR_024101, intron 2 of 2)	intron (NR_024101, intron 2 of 2)	517	NR_024101	649446		NM_001039796		DLGAP1-AS1	HsT914	DLGAP1 antisense RNA 1	ncRNA
11745	chr15	83066863	83067949	+	24	NA	promoter-TSS (NR_039740)	promoter-TSS (NR_039740)	71	NR_039740	100616404		NR_039740	ENSG00000263643	MIR4515	mir-4515	microRNA 4515	ncRNA
10978	chr8	63038413	63039526	+	24	NA	promoter-TSS (NM_003878)	promoter-TSS (NM_003878)	-163	NM_003878	8836		NM_003878	ENSG00000137563	GGH	GATD10|GH	gamma-glutamyl hydrolase	protein-coding
10092	chr5_KI270897v1_alt	250584	251368	+	24	NA	intron (NM_022968, intron 1 of 2).2	CpG	393	NM_022968	8293		NM_021967	ENSG00000172058	SERF1A	4F5|FAM2A|H4F5|SERF1|SMAM1	small EDRK-rich factor 1A	protein-coding
9381	chr19	34404044	34404961	+	24	NA	exon (NM_001353433, exon 1 of 7)	exon (NM_001353433, exon 1 of 7)	103	NM_032346	84306		NM_032346	ENSG00000126249	PDCD2L	-	programmed cell death 2 like	protein-coding
10136-2	chr8	22768065	22769048	+	24	NA	intron (NM_001363233, intron 4 of 6)	intron (NM_001363233, intron 4 of 6)	-75076	NM_004430	1960		NM_004430	ENSG00000179388	EGR3	EGR-3|PILOT	early growth response 3	protein-coding
8908	chr7	6590179	6590967	+	24	NA	intron (NM_001303039, intron 1 of 6)	intron (NM_001303039, intron 1 of 6)	552	NM_024067	79034		NM_024067	ENSG00000146576	INTS15	C7orf26	integrator complex subunit 15	protein-coding
12603	chr19	40604826	40605069	+	24	NA	intron (NM_001042545, intron 1 of 29)	intron (NM_001042545, intron 1 of 29)	3578	NM_001042545	8425		NM_003573	ENSG00000090006	LTBP4	ARCL1C|LTBP-4|LTBP4L|LTBP4S	latent transforming growth factor beta binding protein 4	protein-coding
10911	chr13	102845305	102846594	+	24	NA	promoter-TSS (NM_000123)	promoter-TSS (NM_000123)	-83	NM_000123	2073		NM_000123	ENSG00000134899	ERCC5	COFS3|ERCC5-201|ERCM2|UVDR|XPG|XPGC	ERCC excision repair 5, endonuclease	protein-coding
20447	chr16	2155018	2155783	+	24	NA	promoter-TSS (NR_002736)	promoter-TSS (NR_002736)	-42	NR_132114	100507303		NR_132114	ENSG00000260260	SNHG19	SNORD60HG	small nucleolar RNA host gene 19	ncRNA
20533	chr15	66701100	66702859	+	24	NA	promoter-TSS (NR_027654)	promoter-TSS (NR_027654)	-257	NM_005585	4091		NM_005585	ENSG00000137834	SMAD6	AOVD2|HsT17432|MADH6|MADH7	SMAD family member 6	protein-coding
9139	chr11	130314473	130315416	+	24	NA	promoter-TSS (NM_014155)	promoter-TSS (NM_014155)	-27	NM_001370222	29068		NM_014155	ENSG00000196323	ZBTB44	BTBD15|HSPC063|ZNF851	zinc finger and BTB domain containing 44	protein-coding
17077	chr13	93766848	93768843	+	24	NA	intron (NM_005708, intron 2 of 8)	intron (NM_005708, intron 2 of 8)	90628	NR_046536	100873973		NR_046536		GPC6-AS2	-	GPC6 antisense RNA 2	ncRNA
18809	chr12	49939142	49940167	+	24	NA	Intergenic	Intergenic	-11083	NM_000486	359		NM_000486	ENSG00000167580	AQP2	AQP-CD|NDI2|WCH-CD	aquaporin 2	protein-coding
20769-2	chr5	177301844	177303110	+	24	NA	exon (NM_001031677, exon 5 of 8)	exon (NM_001031677, exon 5 of 8)	1242	NM_001031677	53917		NM_130781	ENSG00000169228	RAB24	-	RAB24, member RAS oncogene family	protein-coding
10811	chr15	56040039	56041130	+	24	NA	Intergenic	Intergenic	-46972	NM_006154	4734		NM_006154	ENSG00000069869	NEDD4	NEDD4-1|RPF1	NEDD4 E3 ubiquitin protein ligase	protein-coding
8753	chr3	64022748	64023670	+	24	NA	intron (NM_001271779, intron 1 of 8)	CpG	263	NM_001271781	9861		NM_014814	ENSG00000163636	PSMD6	Rpn7|S10|SGA-113M|p42A|p44S10	proteasome 26S subunit, non-ATPase 6	protein-coding
32449	chr10	72095495	72096834	+	24	NA	non-coding (NR_045564, exon 10 of 10)	non-coding (NR_045564, exon 10 of 10)	-7132	NM_014767	9806		NM_014767	ENSG00000107742	SPOCK2	testican-2	SPARC (osteonectin), cwcv and kazal like domains proteoglycan 2	protein-coding
37460	chr10	121499454	121501100	+	24	NA	intron (NM_022970, intron 11 of 17)	intron (NM_022970, intron 11 of 17)	31037	NM_001320654	2263		NM_000141	ENSG00000066468	FGFR2	BBDS|BEK|BFR-1|CD332|CEK3|CFD1|ECT1|JWS|K-SAM|KGFR|TK14|TK25	fibroblast growth factor receptor 2	protein-coding
9495	chr14	61580810	61582091	+	24	NA	intron (NR_039985, intron 1 of 2)	MLT1H|LTR|ERVL-MaLR	-10797	NR_110416	101927780		NR_110416	ENSG00000250548	LINC01303	-	long intergenic non-protein coding RNA 1303	ncRNA
11823	chr12	123722352	123723228	+	24	NA	intron (NM_012463, intron 3 of 19)	intron (NM_012463, intron 3 of 19)	10437	NM_012463	23545		NM_012463	ENSG00000185344	ATP6V0A2	A2|ARCL|ARCL2A|ATP6A2|ATP6N1D|J6B7|RTF|STV1|TJ6|TJ6M|TJ6S|VPH1|WSS|a2V	ATPase H+ transporting V0 subunit a2	protein-coding
8649	chr2	179049515	179050415	+	24	NA	5' UTR (NM_001316745, exon 1 of 12)	5' UTR (NM_001316745, exon 1 of 12)	172	NM_001316745	285025		NM_173648	ENSG00000163492	CCDC141	CAMDI	coiled-coil domain containing 141	protein-coding
20726	chr9	112333935	112334764	+	24	NA	promoter-TSS (NM_001244896)	promoter-TSS (NM_001244896)	-685	NM_001163790	9991		NM_005156	ENSG00000119314	PTBP3	ROD1	polypyrimidine tract binding protein 3	protein-coding
10753	chr3	172658815	172660058	+	24	NA	intron (NM_001146276, intron 1 of 4)	LTR22C0|LTR|ERVK	51631	NM_001146276	57552		NM_020792	ENSG00000144959	NCEH1	AADACL1|NCEH	neutral cholesterol ester hydrolase 1	protein-coding
10968	chr9	127715255	127716630	+	24	NA	promoter-TSS (NM_001317037)	promoter-TSS (NM_001317037)	-137	NM_001317037	158248		NM_144965	ENSG00000167094	TTC16	-	tetratricopeptide repeat domain 16	protein-coding
11289	chr19	40231557	40232460	+	24	NA	3' UTR (NM_001330511, exon 12 of 12)	3' UTR (NM_001330511, exon 12 of 12)	-5319	NM_024877	79935		NM_024877	ENSG00000105219	CCNP	CNTD2	cyclin P	protein-coding
10065	chr19	13774177	13775322	+	24	NA	TTS (NM_001329572)	TTS (NM_001329572)	293	NM_014047	28974		NM_014047	ENSG00000104979	C19orf53	HSPC023|L10K|LYDG10	chromosome 19 open reading frame 53	protein-coding
13656	chr12	93019688	93020961	+	24	NA	intron (NR_040096, intron 3 of 4)	MamRTE1|LINE|RTE-BovB	-91029	NM_003566	8411		NM_003566	ENSG00000102189	EEA1	MST105|MSTP105|ZFYVE2	early endosome antigen 1	protein-coding
11837-2	chr7	27346702	27348016	+	24	NA	Intergenic	Intergenic	-100130	NR_120507	101410536		NR_120507	ENSG00000253405	EVX1-AS	EVX1-AS1|EVX1AS	EVX1 antisense RNA	ncRNA
10567	chr4	15653435	15654999	+	24	NA	intron (NM_012161, intron 1 of 10)	intron (NM_012161, intron 1 of 10)	1140	NM_012161	26234		NM_012161	ENSG00000118564	FBXL5	FBL4|FBL5|FLR1	F-box and leucine rich repeat protein 5	protein-coding
14302	chr4	128573764	128574852	+	24	NA	Intergenic	MIRb|SINE|MIR	146292	NR_125882	100507487		NR_125882	ENSG00000251432	LINC02615	-	long intergenic non-protein coding RNA 2615	ncRNA
7013-2	chr2	209156692	209157574	+	24	NA	Intergenic	PABL_A|LTR|ERV1	-266914	NM_001375493	4133		NM_002374	ENSG00000078018	MAP2	MAP-2|MAP2A|MAP2B|MAP2C	microtubule associated protein 2	protein-coding
17531	chr4	186684292	186686207	+	24	NA	intron (NM_005245, intron 2 of 26)	intron (NM_005245, intron 2 of 26)	38607	NM_005245	2195		NM_005245	ENSG00000083857	FAT1	CDHF7|CDHR8|FAT|ME5|hFat1	FAT atypical cadherin 1	protein-coding
8132	chr12	113899202	113900208	+	24	NA	intron (NM_016196, intron 21 of 23)	intron (NM_016196, intron 21 of 23)	66620	NM_016196	9904		NM_016196	ENSG00000122965	RBM19	Mrd1	RNA binding motif protein 19	protein-coding
14972	chr12	54300623	54302032	+	24	NA	promoter-TSS (NM_001136023)	promoter-TSS (NM_001136023)	-290	NM_001261461	4778		NM_006163	ENSG00000123405	NFE2	NF-E2|p45	nuclear factor, erythroid 2	protein-coding
10633-2	chr16	58121389	58122554	+	24	NA	intron (NR_136632, intron 1 of 5)	intron (NR_136632, intron 1 of 5)	7410	NM_013242	29105		NM_013242	ENSG00000070761	CFAP20	BUG22|C16orf80|EVORF|GTL3|fSAP23	cilia and flagella associated protein 20	protein-coding
11457-2	chr20	10034822	10035953	+	24	NA	intron (NM_198798, intron 1 of 9)	intron (NM_198798, intron 1 of 9)	400	NM_001303472	63926		NM_022096	ENSG00000132623	ANKEF1	ANKRD5	ankyrin repeat and EF-hand domain containing 1	protein-coding
11839-2	chrY	11317391	11319061	+	24	NA	Intergenic	BSR/Beta|Satellite|Satellite	1103364	NR_033667	352887		NR_033667	ENSG00000291034	GYG2P1	GYG2P	glycogenin 2 pseudogene 1	pseudo
18665	chr19	14495866	14497968	+	24	NA	promoter-TSS (NM_005716)	promoter-TSS (NM_005716)	-768	NM_202494	10755		NM_005716	ENSG00000123159	GIPC1	C19orf3|GIPC|GLUT1CBP|Hs.6454|IIP-1|NIP|OPDM2|RGS19IP1|SEMCAP|SYNECTIIN|SYNECTIN|TIP-2	GIPC PDZ domain containing family member 1	protein-coding
17937	chr15	42490441	42492304	+	24	NA	promoter-TSS (NM_001381997)	promoter-TSS (NM_001381997)	-231	NM_001366846	64397		NM_022473	ENSG00000103994	ZNF106	SH3BP3|ZFP106|ZNF474	zinc finger protein 106	protein-coding
16387	chr4	2262082	2263355	+	24	NA	promoter-TSS (NM_006454)	promoter-TSS (NM_006454)	-609	NM_006454	10608		NM_006454	ENSG00000123933	MXD4	MAD4|MST149|MSTP149|bHLHc12	MAX dimerization protein 4	protein-coding
11628	chr1	145918593	145920008	+	24	NA	promoter-TSS (NR_104033)	promoter-TSS (NR_104033)	-44	NR_104033	114814		NM_057163	ENSG00000293505	GNRHR2	GNRHR2P|GnRH-II-R	gonadotropin releasing hormone receptor 2 (pseudogene)	pseudo
9646	chr6	692833	693727	+	24	NA	promoter-TSS (NR_073064)	promoter-TSS (NR_073064)	-139	NR_073064	55770		NM_018303	ENSG00000112685	EXOC2	NEDFACH|SEC5|SEC5L1|Sec5p	exocyst complex component 2	protein-coding
11198	chr17	59761418	59762243	+	24	NA	intron (NM_001329397, intron 5 of 10)	L1MEc|LINE|L1	54176	NM_001329396	81671		NM_030938	ENSG00000062716	VMP1	EPG3|TANGO5|TMEM49	vacuole membrane protein 1	protein-coding
12531	chr19_GL949752v1_alt	324598	325820	+	24	NA	intron (NM_020659, intron 2 of 13).2	intron (NM_020659, intron 2 of 13).2	5051	NM_001005367	57348		NM_020659	ENSG00000167614	TTYH1	-	tweety family member 1	protein-coding
11124-2	chr2	204610410	204611512	+	24	NA	intron (NM_205863, intron 1 of 21)	intron (NM_205863, intron 1 of 21)	65486	NM_001302769	117583		NM_057177	ENSG00000116117	PARD3B	ALS2CR19|PAR3B|PAR3L|PAR3beta	par-3 family cell polarity regulator beta	protein-coding
9959-2	chr3	120003786	120004859	+	24	NA	intron (NM_001146156, intron 1 of 10)	L1PA7|LINE|L1	80326	NR_162125	113839522		NR_162125		MIR6529	-	microRNA 6529	ncRNA
5926	chr16	80992882	80993715	+	24	NA	intron (NR_147842, intron 1 of 2)	L1MEc|LINE|L1	4378	NM_001351973	56942		NM_020188	ENSG00000103121	CMC2	2310061C15Rik|C16orf61|DC13	C-X9-C motif containing 2	protein-coding
11142	chr7	30254441	30255711	+	24	NA	intron (NR_136267, intron 2 of 3)	intron (NR_136267, intron 2 of 3)	-29521	NM_147128	223082		NM_147128	ENSG00000180233	ZNRF2	RNF202	zinc and ring finger 2	protein-coding
13919	chr15	89124811	89126795	+	24	NA	intron (NM_152924, intron 3 of 10)	intron (NM_152924, intron 3 of 10)	37347	NM_007011	11057		NM_007011	ENSG00000140526	ABHD2	HS1-2|LABH2|PHPS1-2	abhydrolase domain containing 2, acylglycerol lipase	protein-coding
8466	chr6	37790825	37791726	+	24	NA	Intergenic	Intergenic	-28452	NM_021943	60685		NM_021943	ENSG00000156639	ZFAND3	TEX27	zinc finger AN1-type containing 3	protein-coding
19068	chr5	95856165	95859505	+	24	NA	intron (NR_026936, intron 2 of 2)	MIR|SINE|MIR	5603	NR_026936	202299		NM_175616	ENSG00000236882	LINC01554	C5orf27|FIS	long intergenic non-protein coding RNA 1554	ncRNA
12663	chr18	80033069	80034773	+	24	NA	promoter-TSS (NM_024805)	promoter-TSS (NM_024805)	15	NM_001305564	10907		NM_006701	ENSG00000141759	TXNL4A	BMKS|DIB1|DIM1|SNRNP15|TXNL4|U5-15kD	thioredoxin like 4A	protein-coding
13352	chr2	110677712	110678952	+	24	NA	promoter-TSS (NM_001278617)	promoter-TSS (NM_001278617)	-225	NM_001278616	699		NM_004336	ENSG00000169679	BUB1	BUB1A|BUB1L|MCPH30|hBUB1	BUB1 mitotic checkpoint serine/threonine kinase	protein-coding
10185	chr16	48244039	48245188	+	24	NA	promoter-TSS (NM_032583)	promoter-TSS (NM_032583)	-25	NM_001370496	85320		NM_032583	ENSG00000121270	ABCC11	EWWD|MRP8|WW	ATP binding cassette subfamily C member 11	protein-coding
19474	chr2	127387019	127388004	+	24	NA	5' UTR (NM_001371910, exon 1 of 17)	5' UTR (NM_001371910, exon 1 of 17)	464	NM_001371910	10746		NM_006609	ENSG00000169967	MAP3K2	MEKK2|MEKK2B	mitogen-activated protein kinase kinase kinase 2	protein-coding
9036	chr1	169765606	169766785	+	24	NA	Intergenic	Intergenic	28494	NM_001320201	92342		NM_033418	ENSG00000171806	METTL18	AsTP2|C1orf156|HPM1	methyltransferase 18, RPL3 N3(tau)-histidine	protein-coding
9262	chr13	73618340	73619378	+	24	NA	Intergenic	Intergenic	54615	NR_047009	100874155		NR_047009		LINC00392	-	long intergenic non-protein coding RNA 392	ncRNA
11913	chr3	13451452	13452387	+	24	NA	Intergenic	MER66A|LTR|ERV1	28134	NR_046690	100874101		NR_046690	ENSG00000244502	HDAC11-AS1	-	HDAC11 antisense RNA 1	ncRNA
12392	chr8	80110235	80111737	+	24	NA	intron (NM_001287144, intron 1 of 5)	AluJr|SINE|Alu	-30155	NM_001287142	7163		NM_005079	ENSG00000076554	TPD52	D52|N8L|PC-1|PrLZ|hD52	tumor protein D52	protein-coding
7476	chr6	7553525	7554343	+	24	NA	intron (NM_001319034, intron 1 of 23)	intron (NM_001319034, intron 1 of 23)	12263	NM_001008844	1832		NM_004415	ENSG00000096696	DSP	DCWHKTA|DP	desmoplakin	protein-coding
7268-2	chr2	167651191	167652327	+	24	NA	intron (NM_020981, intron 3 of 4)	intron (NM_020981, intron 3 of 4)	289385	NR_131227	105616981		NR_131227	ENSG00000235335	B3GALT1-AS1	-	B3GALT1 antisense RNA 1	ncRNA
10273	chr13	79662334	79663609	+	24	NA	Intergenic	Intergenic	96244	NR_125772	103724388		NR_125772	ENSG00000227676	LINC01068	-	long intergenic non-protein coding RNA 1068	ncRNA
26716	chr14	94593007	94595142	+	24	NA	TTS (NM_000624)	TTS (NM_000624)	12648	NM_000624	5104		NM_000624	ENSG00000188488	SERPINA5	PAI-3|PAI3|PCI|PCI-B|PLANH3|PROCI	serpin family A member 5	protein-coding
12880	chr5	150356658	150358572	+	24	NA	promoter-TSS (NM_001135245)	promoter-TSS (NM_001135245)	-24	NM_001135243	6949		NM_000356	ENSG00000070814	TCOF1	MFD1|TCS|TCS1|treacle	treacle ribosome biogenesis factor 1	protein-coding
10492	chr13	110908157	110909365	+	24	NA	intron (NR_104586, intron 2 of 4)	intron (NR_104586, intron 2 of 4)	6308	NR_104586	55608		NM_017664	ENSG00000088448	ANKRD10	-	ankyrin repeat domain 10	protein-coding
8643	chr10	86752184	86753096	+	24	NA	Intergenic	Intergenic	-3979	NM_004329	657		NM_004329	ENSG00000107779	BMPR1A	10q23del|ACVRLK3|ALK-3|ALK3|BMPR-1A|CD292|SKR5	bone morphogenetic protein receptor type 1A	protein-coding
21073	chr14	63853193	63854586	+	24	NA	intron (NM_015180, intron 1 of 114)	intron (NM_015180, intron 1 of 114)	885	NM_182914	23224		NM_015180	ENSG00000054654	SYNE2	EDMD5|KASH2|NUA|NUANCE|Nesp2|Nesprin-2|SYNE-2|TROPH	spectrin repeat containing nuclear envelope protein 2	protein-coding
31589	chr17	7557996	7558874	+	24	NA	TTS (NM_003809)	TTS (NM_003809)	143	NM_172088	8741		NM_003808	ENSG00000161955	TNFSF13	APRIL|CD256|TALL-2|TALL2|TNLG7B|TRDL-1|UNQ383/PRO715|ZTNF2	TNF superfamily member 13	protein-coding
9882	chr3	95347784	95349304	+	24	NA	Intergenic	AluSx|SINE|Alu	334649	NR_077228	100287639		NR_077228	ENSG00000293294	MTHFD2P1	-	methylenetetrahydrofolate dehydrogenase (NADP+ dependent) 2, methenyltetrahydrofolate cyclohydrolase pseudogene 1	pseudo
16557	chr7	67763759	67765934	+	24	NA	Intergenic	Intergenic	-255407	NR_120514	102723427		NR_120514	ENSG00000225209	LOC102723427	-	uncharacterized LOC102723427	ncRNA
16353	chr12	11921718	11923684	+	24	NA	Intergenic	Intergenic	-127160	NM_001370268	79370		NM_030766	ENSG00000121380	BCL2L14	BCLG	BCL2 like 14	protein-coding
7628	chr12	65740884	65741612	+	24	NA	Intergenic	Intergenic	-83212	NM_001300918	8091		NM_003483	ENSG00000149948	HMGA2	BABL|HMGI-C|HMGIC|LIPO|SRS5|STQTL9	high mobility group AT-hook 2	protein-coding
21001	chr19	5908683	5910794	+	24	NA	3' UTR (NM_001017921, exon 2 of 2)	3' UTR (NM_001017921, exon 2 of 2)	-4516	NM_080590	828		NM_004058	ENSG00000105519	CAPS	CAPS1	calcyphosine	protein-coding
11074	chr18	3617619	3618686	+	24	NA	intron (NM_001242765, intron 4 of 8)	intron (NM_001242765, intron 4 of 8)	14415	NR_119377	84777		NM_032691		DLGAP1-AS2	DLPAP1-AS2	DLGAP1 antisense RNA 2	ncRNA
5949	chr1	31154205	31154981	+	24	NA	Intergenic	MIRb|SINE|MIR	85294	NM_024522	79570		NM_024522	ENSG00000084628	NKAIN1	FAM77C	sodium/potassium transporting ATPase interacting 1	protein-coding
7986-4	chr20	53869654	53870266	+	24	NA	Intergenic	Intergenic	5749	NR_002189	391257		NR_002189		SUMO1P1	PIC1L|UBL2|UBL6	SUMO1 pseudogene 1	pseudo
7774	chr4	91064135	91064924	+	24	NA	intron (NM_001145065, intron 9 of 10)	MER68B|LTR|ERVL	829498	NM_207491	401145		NM_207491	ENSG00000184305	CCSER1	FAM190A	coiled-coil serine rich protein 1	protein-coding
13113	chr14	102795141	102795952	+	24	NA	intron (NM_001199427, intron 1 of 7)	intron (NM_001199427, intron 1 of 7)	18067	NM_145726	7187		NM_003300	ENSG00000131323	TRAF3	CAP-1|CAP1|CD40bp|CRAF1|IIAE5|LAP1|RNF118	TNF receptor associated factor 3	protein-coding
9776	chr17	12730746	12731796	+	24	NA	intron (NM_153604, intron 5 of 12)	intron (NM_153604, intron 5 of 12)	-25136	NR_104605	101928418		NR_104605	ENSG00000227274	MYOCD-AS1	-	MYOCD antisense RNA 1	ncRNA
12535	chr17	44344643	44346130	+	24	NA	promoter-TSS (NM_002087)	promoter-TSS (NM_002087)	84	NM_002087	2896		NM_002087	ENSG00000030582	GRN	CLN11|GEP|GP88|PCDGF|PEPI|PGRN	granulin precursor	protein-coding
10526-3	chr17	59362197	59363280	+	23	NA	intron (NM_001005404, intron 2 of 4)	intron (NM_001005404, intron 2 of 4)	-3345	NR_039882	100616204		NR_039882	ENSG00000263857	MIR4729	-	microRNA 4729	ncRNA
10637	chr10	110920021	110921140	+	23	NA	intron (NR_136749, intron 1 of 7)	intron (NR_136749, intron 1 of 7)	976	NM_007373	8036		NM_007373	ENSG00000108061	SHOC2	NSLH1|SIAA0862|SOC2|SUR8	SHOC2 leucine rich repeat scaffold protein	protein-coding
10019	chr8	29126449	29127388	+	23	NA	intron (NM_015254, intron 25 of 39)	intron (NM_015254, intron 25 of 39)	136152	NM_015254	23303		NM_015254	ENSG00000197892	KIF13B	GAKIN	kinesin family member 13B	protein-coding
13425-2	chr7	2859844	2861336	+	23	NA	Intergenic	Intergenic	-16282	NM_001293092	2768		NM_007353	ENSG00000146535	GNA12	HG1M1|NNX3|RMP|gep	G protein subunit alpha 12	protein-coding
7459	chr18	76490457	76491234	+	23	NA	promoter-TSS (NR_136504)	promoter-TSS (NR_136504)	-807	NR_136504	101927989		NR_136504	ENSG00000265778	ZNF516-AS1	-	ZNF516 antisense RNA 1	ncRNA
8122	chr17	4806880	4807470	+	23	NA	promoter-TSS (NM_001243108)	promoter-TSS (NM_001243108)	23	NM_001243108	5338		NM_002663	ENSG00000129219	PLD2	PLD1C	phospholipase D2	protein-coding
14926	chr3	117277801	117279165	+	23	NA	Intergenic	MIR|SINE|MIR	357052	NR_121607	100506724		NR_121607	ENSG00000242385	LINC00901	LSAMP-AS4|TCONS_00005428	long intergenic non-protein coding RNA 901	ncRNA
11177	chr11	65779532	65780699	+	23	NA	exon (NM_138368, exon 2 of 2)	exon (NM_138368, exon 2 of 2)	861	NM_138368	91056		NM_138368	ENSG00000254470	AP5B1	AP-5|PP1030	adaptor related protein complex 5 subunit beta 1	protein-coding
11070-2	chr5	56815998	56817141	+	23	NA	intron (NM_005921, intron 1 of 19)	CpG	1020	NM_005921	4214		NM_005921	ENSG00000095015	MAP3K1	MAPKKK1|MEKK|MEKK 1|MEKK1|SRXY6	mitogen-activated protein kinase kinase kinase 1	protein-coding
13435	chr16_KI270854v1_alt	129220	130421	+	23	NA	non-coding (NR_024121, exon 1 of 1).2	non-coding (NR_024121, exon 1 of 1).2	255	NR_024121	64493		NR_024121		LINC00235	C16orf10|LA16c-356B8.1|NCRNA00235	long intergenic non-protein coding RNA 235	ncRNA
8380	chr13	18211753	18212530	+	23	NA	intron (NR_027278, intron 1 of 7)	HSATI|Satellite|Satellite	16844	NR_027278	26080		NR_027278	ENSG00000279516	FAM230C	LINC00281|NCRNA00281	family with sequence similarity 230 member C	ncRNA
8581	chr3	71131656	71132628	+	23	NA	promoter-TSS (NM_001349342)	promoter-TSS (NM_001349342)	55	NM_001349343	27086		NM_032682	ENSG00000114861	FOXP1	12CC4|HSPC215|MFH|QRF1|hFKH1B	forkhead box P1	protein-coding
8716-2	chr19	40348375	40349303	+	23	NA	promoter-TSS (NR_046202)	promoter-TSS (NR_046202)	144	NM_012268	23646		NM_012268	ENSG00000105223	PLD3	AD19|HU-K4|HUK4|SCA46	phospholipase D family member 3	protein-coding
6615-2	chr2	221273623	221274273	+	23	NA	Intergenic	Plat_L3|LINE|CR1	298356	NM_001304537	2043		NM_004438	ENSG00000116106	EPHA4	EK8|HEK8|SEK|TYRO1	EPH receptor A4	protein-coding
14572	chr7	876865	878608	+	23	NA	intron (NM_015949, intron 1 of 8)	intron (NM_015949, intron 1 of 8)	1182	NM_015949	51608		NM_015949	ENSG00000239857	GET4	C7orf20|CDG2Y|CEE|CGI-20|TRC35	guided entry of tail-anchored proteins factor 4	protein-coding
9417	chr10	68826378	68827486	+	23	NA	promoter-TSS (NM_001130161)	promoter-TSS (NM_001130161)	-599	NM_152709	219736		NM_152709	ENSG00000165730	STOX1	C10orf24	storkhead box 1	protein-coding
13508-2	chr15	65384551	65386056	+	23	NA	intron (NM_020962, intron 18 of 19)	intron (NM_020962, intron 18 of 19)	-7301	NM_004884	9543		NM_004884	ENSG00000174498	IGDCC3	HsT18880|PUNC	immunoglobulin superfamily DCC subclass member 3	protein-coding
13851	chr1	109959525	109960785	+	23	NA	Intergenic	Intergenic	-24610	NM_006621	10768		NM_006621	ENSG00000168710	AHCYL1	DCAL|IRBIT|PPP1R78|PRO0233|XPVKONA	adenosylhomocysteinase like 1	protein-coding
8758	chrX	72713626	72714738	+	23	NA	promoter-TSS (NM_001172436)	promoter-TSS (NM_001172436)	-1	NM_001172436	5255		NM_002637	ENSG00000067177	PHKA1	PHKA	phosphorylase kinase regulatory subunit alpha 1	protein-coding
11538	chr3	69084330	69085360	+	23	NA	promoter-TSS (NM_006407)	promoter-TSS (NM_006407)	-92	NM_006407	10550		NM_006407	ENSG00000144746	ARL6IP5	DERP11|GTRAP3-18|HSPC127|JWA|PRAF3|Yip6b|addicsin|hp22|jmx	ADP ribosylation factor like GTPase 6 interacting protein 5	protein-coding
9831	chr18	44679044	44679653	+	23	NA	promoter-TSS (NM_001379141)	promoter-TSS (NM_001379141)	-725	NM_001379141	26040		NM_015559	ENSG00000152217	SETBP1	MRD29|SEB	SET binding protein 1	protein-coding
8704	chr17	19317277	19318324	+	23	NA	intron (NM_001102664, intron 4 of 7)	intron (NM_001102664, intron 4 of 7)	-11539	NR_048576	100874018		NR_048576	ENSG00000235397	EPN2-AS1	-	EPN2 antisense RNA 1	ncRNA
10456	chr16	31700374	31701171	+	23	NA	intron (NR_024034, intron 1 of 8)	CpG	159	NR_024034	100132341		NM_024048	ENSG00000290927	CLUHP3	C16orf67|KIAA0664L3|KIAA0664P3|URLC3	clustered mitochondria homolog pseudogene 3	pseudo
16643	chr1	62687324	62688216	+	23	NA	intron (NM_033407, intron 1 of 48)	CpG	598	NM_001272000	85440		NM_033407	ENSG00000116641	DOCK7	DEE23|EIEE23|ZIR2	dedicator of cytokinesis 7	protein-coding
16406	chr3	33717320	33718925	+	23	NA	5' UTR (NM_001365633, exon 1 of 36)	5' UTR (NM_001365633, exon 1 of 36)	132	NM_001375701	23122		NM_015097	ENSG00000163539	CLASP2	-	cytoplasmic linker associated protein 2	protein-coding
6668	chr3	63192317	63193100	+	23	NA	Intergenic	(T)n|Simple_repeat|Simple_repeat	-85600	NM_001130003	132204		NM_144642	ENSG00000163630	SYNPR	SPO	synaptoporin	protein-coding
14956	chr8	9076376	9078208	+	23	NA	intron (NM_001354638, intron 6 of 7)	intron (NM_001354638, intron 6 of 7)	-18662	NR_145772	109616996		NR_145772		SNORD3I	-	small nucleolar RNA, C/D box 3I	snoRNA
18475	chr1	47696544	47698415	+	23	NA	Intergenic	MIRc|SINE|MIR	259435	NM_004474	2306		NM_004474	ENSG00000186564	FOXD2	FKHL17|FREAC-9|FREAC9	forkhead box D2	protein-coding
11039	chr17	68759092	68760083	+	23	NA	Intergenic	Intergenic	131433	NR_110825	101928104		NR_110825	ENSG00000267659	LINC01482	-	long intergenic non-protein coding RNA 1482	ncRNA
12561-3	chr9	4237684	4238884	+	23	NA	intron (NM_001042413, intron 2 of 10)	intron (NM_001042413, intron 2 of 10)	61784	NM_001042413	169792		NM_152629	ENSG00000107249	GLIS3	NDH|ZNF515	GLIS family zinc finger 3	protein-coding
20249	chr2	5725633	5726582	+	23	NA	Intergenic	Intergenic	33723	NM_003108	6664		NM_003108	ENSG00000176887	SOX11	CSS9|IDDMOH|MRD27	SRY-box transcription factor 11	protein-coding
9189	chr15	49169752	49170851	+	23	NA	promoter-TSS (NM_001289030)	promoter-TSS (NM_001289030)	54	NM_002044	2585		NM_002044	ENSG00000156958	GALK2	GK2	galactokinase 2	protein-coding
7945	chr3	10115196	10116665	+	23	NA	intron (NM_018462, intron 1 of 2)	intron (NM_018462, intron 1 of 2)	255	NM_018462	55845		NM_018462	ENSG00000254999	BRK1	C3orf10|HSPC300|MDS027|hHBrk1	BRICK1 subunit of SCAR/WAVE actin nucleating complex	protein-coding
12142	chr19	44051633	44052540	+	23	NA	promoter-TSS (NM_013361)	promoter-TSS (NM_013361)	50	NM_013361	7766		NM_013361	ENSG00000178386	ZNF223	-	zinc finger protein 223	protein-coding
9385-2	chr6	10528002	10528963	+	23	NA	5' UTR (NM_001374747, exon 1 of 3)	5' UTR (NM_001374747, exon 1 of 3)	112	NM_001374747	2651		NM_001491	ENSG00000111846	GCNT2	CCAT|CTRCT13|GCNT2C|GCNT5|IGNT|II|NACGT1|NAGCT1|ULG3|bA360O19.2|bA421M1.1	glucosaminyl (N-acetyl) transferase 2 (I blood group)	protein-coding
8539	chr11	102190076	102190962	+	23	NA	intron (NM_001130145, intron 4 of 8)	AluSz6|SINE|Alu	78071	NM_001195045	10413		NM_006106	ENSG00000137693	YAP1	COB1|YAP|YAP-1|YAP2|YAP65|YKI	Yes1 associated transcriptional regulator	protein-coding
8382	chr8	30143881	30145059	+	23	NA	intron (NM_001100916, intron 1 of 2)	intron (NM_001100916, intron 1 of 2)	195	NM_001100916	619373		NM_001100916	ENSG00000177669	MBOAT4	FKSG89|GOAT|OACT4	membrane bound O-acyltransferase domain containing 4	protein-coding
8464	chr17	75666792	75667765	+	23	NA	promoter-TSS (NM_013260)	promoter-TSS (NM_013260)	-60	NM_013260	29115		NM_013260	ENSG00000161526	SAP30BP	HCNGP|HTRG|HTRP	SAP30 binding protein	protein-coding
25702	chr10	46051666	46054935	+	23	NA	Intergenic	MIRb|SINE|MIR	-7031	NM_138634	4477		NM_002443	ENSG00000263639	MSMB	HPC13|IGBF|MSP|MSPB|PN44|PRPS|PSP|PSP-94|PSP57|PSP94	microseminoprotein beta	protein-coding
16274	chr9	137611529	137613544	+	23	NA	intron (NM_001317968, intron 1 of 6)	intron (NM_001317968, intron 1 of 6)	5993	NR_122036	85026		NM_032937	ENSG00000203993	ARRDC1-AS1	C9orf37	ARRDC1 antisense RNA 1	ncRNA
9423	chr1	54579162	54580099	+	23	NA	intron (NM_015547, intron 1 of 16)	intron (NM_015547, intron 1 of 16)	31402	NM_147161	26027		NM_015547	ENSG00000162390	ACOT11	BFIT|STARD14|THEA|THEM1	acyl-CoA thioesterase 11	protein-coding
12224-2	chr3	120681215	120682963	+	23	NA	intron (NM_000187, intron 1 of 13)	intron (NM_000187, intron 1 of 13)	150	NM_000187	3081		NM_000187	ENSG00000113924	HGD	AKU|HGO	homogentisate 1,2-dioxygenase	protein-coding
18831-2	chr5	113294640	113295640	+	23	NA	promoter-TSS (NM_002387)	promoter-TSS (NM_002387)	-202	NM_002387	4163		NM_002387	ENSG00000171444	MCC	MCC1	MCC regulator of WNT signaling pathway	protein-coding
13541	chrX	103356131	103357857	+	23	NA	intron (NM_001006614, intron 1 of 1)	intron (NM_001006614, intron 1 of 1)	488	NM_016303	51186		NM_016303	ENSG00000185222	TCEAL9	WBP5|WEX6	transcription elongation factor A like 9	protein-coding
41389	chrX	153722766	153725580	+	23	NA	promoter-TSS (NM_001139441)	promoter-TSS (NM_001139441)	-46	NM_001139441	10134		NM_005745	ENSG00000185825	BCAP31	6C6-AG|BAP31|CDM|DDCH|DELXQ28|DXS1357E|MICRODELXq28	B cell receptor associated protein 31	protein-coding
9959	chr13	33125782	33126707	+	23	NA	intron (NM_001243474, intron 6 of 7)	intron (NM_001243474, intron 6 of 7)	59847	NM_001243466	90627		NM_052851	ENSG00000133121	STARD13	ARHGAP37|DLC2|GT650|LINC00464	StAR related lipid transfer domain containing 13	protein-coding
8179	chr15	89575164	89576305	+	23	NA	exon (NM_152259, exon 1 of 22)	exon (NM_152259, exon 1 of 22)	147	NM_001308025	90381		NM_152259	ENSG00000140534	TICRR	C15orf42|SLD3|Treslin	TOPBP1 interacting checkpoint and replication regulator	protein-coding
10136	chr3	122760634	122761517	+	23	NA	intron (NM_024610, intron 3 of 7)	L2c|LINE|L2	32756	NM_001320728	79663		NM_024610	ENSG00000169087	HSPBAP1	PASS1	HSPB1 associated protein 1	protein-coding
10716	chr10	35195463	35196506	+	23	NA	promoter-TSS (NM_182721)	promoter-TSS (NM_182721)	82	NM_182724	1390		NM_001881	ENSG00000095794	CREM	CREM-2|ICER|hCREM-2	cAMP responsive element modulator	protein-coding
12365	chr12	121598328	121599700	+	23	NA	Intergenic	L2b|LINE|L2	2485	NR_049838	100847078		NR_049838	ENSG00000265470	MIR548AQ	-	microRNA 548aq	ncRNA
9594	chr15	60551591	60552766	+	23	NA	intron (NM_134261, intron 2 of 10)	intron (NM_134261, intron 2 of 10)	40348	NM_134262	6095		NM_002943	ENSG00000069667	RORA	IDDECA|NR1F1|ROR1|ROR2|ROR3|RORa1|RORalpha|RZR-ALPHA|RZRA	RAR related orphan receptor A	protein-coding
9879-2	chr5	160466886	160468324	+	23	NA	promoter-TSS (NR_132748)	promoter-TSS (NR_132748)	-646	NR_132748	107075116		NR_132748	ENSG00000253522	MIR3142HG	-	MIR3142 host gene	ncRNA
14993	chr18	57747775	57749433	+	23	NA	intron (NM_001374385, intron 1 of 27)	intron (NM_001374385, intron 1 of 27)	54711	NM_001374385	5205		NM_005603	ENSG00000081923	ATP8B1	ATPIC|BRIC|FIC1|ICP1|PFIC|PFIC1	ATPase phospholipid transporting 8B1	protein-coding
17140	chr1	1573616	1575472	+	23	NA	exon (NM_014188, exon 1 of 5)	exon (NM_014188, exon 1 of 5)	319	NM_014188	29101		NM_014188	ENSG00000160075	SSU72	HSPC182|PNAS-120	SSU72 homolog, RNA polymerase II CTD phosphatase	protein-coding
12603-2	chr2	241686499	241688015	+	23	NA	promoter-TSS (NM_001165031)	promoter-TSS (NM_001165031)	237	NM_001330161	84289		NM_032329	ENSG00000168395	ING5	p28ING5	inhibitor of growth family member 5	protein-coding
5839-4	chr22	30327053	30327709	+	23	NA	promoter-TSS (NM_001204240)	promoter-TSS (NM_001204240)	-440	NM_001204240	83874		NM_031937	ENSG00000099992	TBC1D10A	EPI64|TBC1D10|dJ130H16.1|dJ130H16.2	TBC1 domain family member 10A	protein-coding
7498	chr13	40985778	40986771	+	23	NA	intron (NM_001370329, intron 1 of 9)	MIRb|SINE|MIR	-3375	NM_001370331	1997		NM_172373	ENSG00000120690	ELF1	EFTUD1|RIA1	E74 like ETS transcription factor 1	protein-coding
17788	chrX	108352828	108354649	+	23	NA	intron (NM_033641, intron 2 of 44)	intron (NM_033641, intron 2 of 44)	84684	NM_033641	1288		NM_001847	ENSG00000197565	COL4A6	CXDELq22.3|DELXq22.3|DFNX6	collagen type IV alpha 6 chain	protein-coding
10840	chr6	138554880	138556209	+	23	NA	intron (NM_020464, intron 1 of 6)	(TTTTTC)n|Simple_repeat|Simple_repeat	17025	NM_020464	57224		NM_020464	ENSG00000135540	NHSL1	C6orf63	NHS like 1	protein-coding
6106	chr1	171220643	171221175	+	23	NA	Intergenic	Intergenic	-27562	NM_001282694	2326		NM_002021	ENSG00000010932	FMO1	-	flavin containing dimethylaniline monoxygenase 1	protein-coding
15370	chr18	657756	659330	+	23	NA	promoter-TSS (NM_001012716)	promoter-TSS (NM_001012716)	-252	NM_001012716	494514		NM_001012716		TYMSOS	C18orf56	TYMS opposite strand RNA	ncRNA
13068	chr4	123649198	123650517	+	23	NA	promoter-TSS (NR_027105)	promoter-TSS (NR_027105)	-134	NR_027105	285419		NR_027105	ENSG00000249464	LINC01091	-	long intergenic non-protein coding RNA 1091	ncRNA
8465-2	chr9	125794763	125795656	+	23	NA	intron (NR_024122, intron 2 of 7)	intron (NR_024122, intron 2 of 7)	47026	NM_001134778	5090		NM_006195	ENSG00000167081	PBX3	-	PBX homeobox 3	protein-coding
8788-2	chr17	74466649	74467164	+	23	NA	intron (NM_001256841, intron 1 of 5)	intron (NM_001256841, intron 1 of 5)	272	NM_001330457	11314		NM_007261	ENSG00000167851	CD300A	CLM-8|CMRF-35-H9|CMRF-35H|CMRF35-H|CMRF35-H9|CMRF35H|CMRF35H9|IGSF12|IRC1|IRC1/IRC2|IRC2|IRp60	CD300a molecule	protein-coding
7972	chr1	224183580	224184304	+	23	NA	intron (NM_001321542, intron 1 of 2)	CpG	262	NM_001321542	8560		NM_003676	ENSG00000143753	DEGS1	DEGS|DEGS-1|DES1|Des-1|FADS7|HLD18|MIG15|MLD	delta 4-desaturase, sphingolipid 1	protein-coding
5969-2	chr7	35758162	35758879	+	23	NA	intron (NR_120511, intron 3 of 5)	intron (NR_120511, intron 3 of 5)	42083	NR_108083	100506725		NR_108082	ENSG00000227544	LINC03013	-	long intergenic non-protein coding RNA 3013	ncRNA
13169-2	chr7	90720630	90722106	+	23	NA	intron (NM_001287136, intron 1 of 13)	intron (NM_001287136, intron 1 of 13)	11552	NM_001287137	5218		NM_012395	ENSG00000058091	CDK14	PFTAIRE1|PFTK1	cyclin dependent kinase 14	protein-coding
15642	chr7	2231959	2233601	+	23	NA	intron (NM_003550, intron 1 of 18)	CpG	165	NM_001013837	8379		NM_003550	ENSG00000002822	MAD1L1	MAD1|MVA7|PIG9|TP53I9|TXBP181	mitotic arrest deficient 1 like 1	protein-coding
9394	chr13	21833580	21834989	+	23	NA	Intergenic	Intergenic	43876	NR_047040	100874182		NR_047040	ENSG00000226722	LINC00424	-	long intergenic non-protein coding RNA 424	ncRNA
11376	chr7	73556666	73557238	+	23	NA	intron (NM_001301061, intron 1 of 6)	intron (NM_001301061, intron 1 of 6)	284	NR_036682	9275		NM_001707	ENSG00000106635	BCL7B	SMARCJ2	BAF chromatin remodeling complex subunit BCL7B	protein-coding
15081	chr11	59766434	59767545	+	23	NA	intron (NM_004177, intron 1 of 10)	intron (NM_004177, intron 1 of 10)	11613	NM_004177	6809		NM_004177	ENSG00000166900	STX3	DIAR12|MVID2|RDMVID|STX3A	syntaxin 3	protein-coding
27341	chr8	69177997	69180530	+	23	NA	Intergenic	THE1B|LTR|ERVL-MaLR	-75073	NR_039986	100505718		NR_039986	ENSG00000253658	LINC01592	-	long intergenic non-protein coding RNA 1592	ncRNA
51212	chr19	42249658	42251412	+	23	NA	exon (NM_006494, exon 2 of 4)	exon (NM_006494, exon 2 of 4)	3364	NM_001308402	2077		NM_006494	ENSG00000105722	ERF	CHYTS|CRS4|PE-2|PE2	ETS2 repressor factor	protein-coding
13498	chr9	87568076	87569806	+	23	NA	intron (NM_001288730, intron 2 of 25)	intron (NM_001288730, intron 2 of 25)	15487	NR_146781	100506897		NR_146781	ENSG00000236709	DAPK1-IT1	-	DAPK1 intronic transcript 1	ncRNA
15908	chr3	114718086	114720020	+	23	NA	intron (NM_001348801, intron 4 of 11)	intron (NM_001348801, intron 4 of 11)	24472	NR_039959	100616166		NR_039959	ENSG00000264623	MIR4796	mir-4796	microRNA 4796	ncRNA
8469	chr3	185758483	185759809	+	23	NA	intron (NM_006548, intron 2 of 15)	intron (NM_006548, intron 2 of 15)	8758	NR_049838	100847078		NR_049838	ENSG00000265470	MIR548AQ	-	microRNA 548aq	ncRNA
10992	chr3	169348808	169349850	+	23	NA	intron (NM_001205194, intron 1 of 15)	intron (NM_001205194, intron 1 of 15)	-98538	NR_134932	105374205		NR_134932	ENSG00000241479	MECOM-AS1	-	MECOM antisense RNA 1	ncRNA
11054	chr3	47475151	47476641	+	23	NA	promoter-TSS (NM_012235)	promoter-TSS (NM_012235)	45	NM_012235	22937		NM_012235	ENSG00000114650	SCAP	-	SREBF chaperone	protein-coding
6248	chr1	95013986	95014585	+	23	NA	intron (NM_144988, intron 3 of 3)	intron (NM_144988, intron 3 of 3)	-47311	NR_132786	101928098		NR_132786	ENSG00000230427	ALG14-AS1	-	ALG14 antisense RNA 1	ncRNA
12521	chr9	42306305	42307875	+	23	NA	Intergenic	Intergenic	108228	NR_126166	100996582		NR_126166		FAM74A7	-	family with sequence similarity 74 member A7	ncRNA
9355	chr8	137460980	137461695	+	23	NA	Intergenic	LTR2|LTR|ERV1	-47749	NR_125428	101927915		NR_125428		LOC101927915	-	uncharacterized LOC101927915	ncRNA
8894-2	chrY	19744290	19745186	+	23	NA	promoter-TSS (NM_004653)	promoter-TSS (NM_004653)	-12	NM_004653	8284		NM_004653	ENSG00000012817	KDM5D	HY|HYA|JARID1D|SMCY	lysine demethylase 5D	protein-coding
9842	chr10	73811055	73812296	+	23	NA	promoter-TSS (NM_003635)	promoter-TSS (NM_003635)	-77	NM_003635	8509		NM_003635	ENSG00000166507	NDST2	HSST2|N-HSST 2|NST2	N-deacetylase and N-sulfotransferase 2	protein-coding
31929	chr9	129482982	129484275	+	23	NA	Intergenic	MIRb|SINE|MIR	-5032	NR_038955	100506190		NR_038955		LINC00963	MetaLnc9	long intergenic non-protein coding RNA 963	ncRNA
11856	chr1	31372711	31373816	+	23	NA	promoter-TSS (NM_001320996)	promoter-TSS (NM_001320996)	25	NM_001320996	2170		NM_004102	ENSG00000121769	FABP3	FABP11|H-FABP|M-FABP|MDGI|O-FABP	fatty acid binding protein 3	protein-coding
8747-2	chr2	240250726	240251883	+	23	NA	Intergenic	Intergenic	-110646	NM_148961	150677		NM_148961	ENSG00000178602	OTOS	OTOSP	otospiralin	protein-coding
12508	chr16	11256121	11257670	+	23	NA	promoter-TSS (NM_003745)	promoter-TSS (NM_003745)	-713	NM_003745	8651		NM_003745	ENSG00000185338	SOCS1	AISIMD|CIS1|CISH1|JAB|SOCS-1|SSI-1|SSI1|TIP-3|TIP3	suppressor of cytokine signaling 1	protein-coding
8468-2	chr3	196962004	196963168	+	23	NA	intron (NM_025163, intron 1 of 2)	LTR5B|LTR|ERVK	6247	NM_025163	80235		NM_025163	ENSG00000119227	PIGZ	GPI-MT-IV|PIG-Z|SMP3	phosphatidylinositol glycan anchor biosynthesis class Z	protein-coding
18068	chr1	44630760	44632398	+	23	NA	promoter-TSS (NM_001376489)	promoter-TSS (NM_001376489)	-389	NM_001376489	55182		NM_016501	ENSG00000187147	RNF220	C1orf164|HLD23	ring finger protein 220	protein-coding
11930	chr11	103109053	103109881	+	23	NA	promoter-TSS (NM_001080463)	promoter-TSS (NM_001080463)	41	NM_001377	79659		NM_001377	ENSG00000187240	DYNC2H1	ATD3|DHC1b|DHC2|DNCH2|DYH1B|SRPS2B|SRTD3|hdhc11	dynein cytoplasmic 2 heavy chain 1	protein-coding
11953	chr13	98333161	98334367	+	23	NA	intron (NM_001286839, intron 2 of 27)	intron (NM_001286839, intron 2 of 27)	125240	NR_036129	100422881		NR_036129	ENSG00000263399	MIR3170	mir-3170	microRNA 3170	ncRNA
10398	chr15	44194564	44195882	+	23	NA	promoter-TSS (NM_001322950)	promoter-TSS (NM_001322950)	48	NM_001286491	84978		NM_032892	ENSG00000171877	FRMD5	NEDEMA	FERM domain containing 5	protein-coding
41389-2	chrX	153725820	153727610	+	23	NA	intron (NM_000033, intron 1 of 9)	intron (NM_000033, intron 1 of 9)	1859	NM_000033	215		NM_000033	ENSG00000101986	ABCD1	ABC42|ALD|ALDP|AMN	ATP binding cassette subfamily D member 1	protein-coding
17180	chr17	81927657	81929409	+	23	NA	promoter-TSS (NM_002359)	promoter-TSS (NM_002359)	704	NR_015454	92659		NR_015454	ENSG00000265688	MILIP	MAFG-AS1|MAFG-DT	MYC inducible lncRNA inactivating p53	ncRNA
14993-2	chr3	65999226	66000996	+	23	NA	intron (NM_001033057, intron 1 of 22)	AluYm1|SINE|Alu	38807	NM_004742	9223		NM_004742	ENSG00000151276	MAGI1	AIP-3|AIP3|BAIAP1|BAP-1|BAP1|MAGI-1|MAGI-1b|Magi1d|TNRC19|WWP3	membrane associated guanylate kinase, WW and PDZ domain containing 1	protein-coding
11550	chr8	124450043	124451528	+	23	NA	promoter-TSS (NM_017956)	promoter-TSS (NM_017956)	-35	NM_017956	55039		NM_017956	ENSG00000183665	TRMT12	TRM12|TYW2	tRNA methyltransferase 12 homolog	protein-coding
9830-2	chr3	99875457	99876693	+	23	NA	promoter-TSS (NM_001370247)	promoter-TSS (NM_001370247)	98	NM_001370247	11259		NM_014890	ENSG00000168386	FILIP1L	DOC-1|DOC1|GIP130|GIP90	filamin A interacting protein 1 like	protein-coding
9842-2	chr3	197627249	197628445	+	23	NA	promoter-TSS (NR_003266)	promoter-TSS (NR_003266)	34	NR_003266	220729		NR_003266	ENSG00000291091	SDHAP4	-	SDHA pseudogene 4	pseudo
15382	chr8	60680431	60681462	+	23	NA	intron (NM_017780, intron 1 of 37)	intron (NM_017780, intron 1 of 37)	2206	NM_017780	55636		NM_017780	ENSG00000171316	CHD7	CRG|HH5|IS3|KAL5	chromodomain helicase DNA binding protein 7	protein-coding
7562	chr8	140834187	140835148	+	23	NA	intron (NM_001352742, intron 4 of 31)	intron (NM_001352742, intron 4 of 31)	-102014	NR_029892	442893		NR_029892	ENSG00000254324	MIR151A	MIR151|MIRN151|hsa-mir-151|hsa-mir-151a	microRNA 151a	ncRNA
18831	chr5	113292294	113293372	+	23	NA	intron (NM_001085377, intron 3 of 18)	intron (NM_001085377, intron 3 of 18)	2105	NM_002387	4163		NM_002387	ENSG00000171444	MCC	MCC1	MCC regulator of WNT signaling pathway	protein-coding
6718	chr4	138199472	138200066	+	23	NA	intron (NM_014331, intron 6 of 11)	intron (NM_014331, intron 6 of 11)	42580	NM_014331	23657		NM_014331	ENSG00000151012	SLC7A11	CCBR1|xCT	solute carrier family 7 member 11	protein-coding
10513	chr8	119919636	119920919	+	23	NA	intron (NM_001283012, intron 1 of 6)	intron (NM_001283012, intron 1 of 6)	46555	NM_022783	64798		NM_022783	ENSG00000155792	DEPTOR	DEP.6|DEPDC6|hDEPTOR	DEP domain containing MTOR interacting protein	protein-coding
18473	chr17	75181687	75183670	+	23	NA	intron (NM_006937, intron 1 of 3)	CpG	281	NM_001005849	6613		NM_006937	ENSG00000188612	SUMO2	HSMT3|SMT3B|SMT3H2|SUMO3|Smt3A	small ubiquitin like modifier 2	protein-coding
9097	chr18	52069892	52070999	+	23	NA	Intergenic	MIR|SINE|MIR	-269752	NM_005215	1630		NM_005215	ENSG00000187323	DCC	CRC18|CRCR1|HGPPS2|IGDCC1|MRMV1|NTN1R1	DCC netrin 1 receptor	protein-coding
7705	chr15	52019644	52020392	+	23	NA	promoter-TSS (NR_156732)	promoter-TSS (NR_156732)	799	NM_002748	5597		NM_002748	ENSG00000069956	MAPK6	ERK3|HsT17250|PRKM6|p97MAPK	mitogen-activated protein kinase 6	protein-coding
9498	chr7	55571578	55572364	+	23	NA	promoter-TSS (NM_001321250)	promoter-TSS (NM_001321250)	-103	NM_001321250	81552		NM_030796	ENSG00000154978	VOPP1	ECOP|GASP|WBP1L2	VOPP1 WW domain binding protein	protein-coding
7011	chr17	58417096	58418078	+	23	NA	promoter-TSS (NM_001305544)	promoter-TSS (NM_001305544)	-53	NM_017763	54894		NM_017763	ENSG00000108375	RNF43	RNF124|SSPCS|URCC	ring finger protein 43	protein-coding
12390	chr15	37034561	37035920	+	23	NA	intron (NM_172316, intron 8 of 12)	intron (NM_172316, intron 8 of 12)	-62339	NR_107030	102466875		NR_107030	ENSG00000277202	MIR8063	hsa-mir-8063	microRNA 8063	ncRNA
32878	chr17	43525071	43528965	+	23	NA	TTS (NM_001261439)	TTS (NM_001261439)	3417	NM_001261439	2118		NM_001986	ENSG00000175832	ETV4	E1A-F|E1AF|PEA3|PEAS3	ETS variant transcription factor 4	protein-coding
14526	chr5	151957311	151959756	+	23	NA	promoter-TSS (NR_109876)	promoter-TSS (NR_109876)	-365	NR_109876	101927115		NR_109876	ENSG00000254226	LINC01933	CTB-12O2.1	long intergenic non-protein coding RNA 1933	ncRNA
8011	chr1	94316331	94317669	+	23	NA	Intergenic	L1MB3|LINE|L1	-69254	NM_001328664	9411		NM_004815	ENSG00000137962	ARHGAP29	PARG1	Rho GTPase activating protein 29	protein-coding
33015	chr1	229271505	229274519	+	23	NA	intron (NM_001271998, intron 1 of 5)	intron (NM_001271998, intron 1 of 5)	-1858	NR_149313	105373159		NR_149312	ENSG00000177788	RAB4A-AS1	-	RAB4A antisense RNA 1	ncRNA
9418	chr18	12862185	12862977	+	23	NA	intron (NM_080422, intron 1 of 9)	MLT1J|LTR|ERVL-MaLR	-21619	NM_001308287	5771		NM_002828	ENSG00000175354	PTPN2	PTN2|PTPT|TC-PTP|TC45|TC48|TCELLPTP|TCPTP	protein tyrosine phosphatase non-receptor type 2	protein-coding
8499	chr6	24330021	24330862	+	23	NA	intron (NM_001195610, intron 3 of 10)	intron (NM_001195610, intron 3 of 10)	-26462	NM_181337	353219		NM_181337	ENSG00000146049	KAAG1	RU2AS	kidney associated DCDC2 antisense RNA 1	ncRNA
6340	chr14_GL000225v1_random	21166	22081	+	23	NA	NA	BSR/Beta|Satellite|Satellite	NA	NA
10106	chr1	28886571	28887567	+	23	NA	promoter-TSS (NM_203342)	promoter-TSS (NM_203342)	-22	NM_203342	2035		NM_004437	ENSG00000159023	EPB41	4.1R|EL1|HE	erythrocyte membrane protein band 4.1	protein-coding
11166-2	chr9	96339205	96340444	+	23	NA	intron (NR_104627, intron 8 of 12)	intron (NR_104627, intron 8 of 12)	-37648	NM_000197	3293		NM_000197	ENSG00000130948	HSD17B3	EDH17B3|SDR12C2	hydroxysteroid 17-beta dehydrogenase 3	protein-coding
17530	chr12	53045413	53045638	+	23	NA	non-coding (NR_033854, exon 4 of 4)	non-coding (NR_033854, exon 4 of 4)	-1466	NM_198316	23371		NM_015319	ENSG00000111077	TNS2	C1-TEN|C1TEN|TENC1	tensin 2	protein-coding
11987	chr1	226122300	226124167	+	23	NA	Intergenic	AluSx1|SINE|Alu	-24770	NR_146443	107985353		NR_146443	ENSG00000234478	ACBD3-AS1	-	ACBD3 antisense RNA 1	ncRNA
15919	chr20	63858326	63859412	+	23	NA	Intergenic	Intergenic	-2629	NM_080622	140701		NM_080622	ENSG00000183260	ABHD16B	C20orf135|dJ591C20.1	abhydrolase domain containing 16B	protein-coding
11803	chr2	164514206	164515476	+	23	NA	intron (NM_001303422, intron 5 of 12)	L1PB1|LINE|L1	53654	NM_001303422	2888		NM_004490	ENSG00000115290	GRB14	-	growth factor receptor bound protein 14	protein-coding
9598-3	chr9	99165080	99165991	+	23	NA	Intergenic	HAL1ME|LINE|L1	56407	NM_033087	85365		NM_033087	ENSG00000119523	ALG2	CDG1I|CDGIi|CMS14|CMSTA3|NET38|hALPG2	ALG2 alpha-1,3/1,6-mannosyltransferase	protein-coding
8460-3	chr2	18823992	18824953	+	23	NA	Intergenic	Intergenic	202499	NR_135287	400945		NR_135287	ENSG00000236204	LINC01376	-	long intergenic non-protein coding RNA 1376	ncRNA
11732-2	chr7	129612268	129613267	+	23	NA	intron (NM_005011, intron 1 of 10)	intron (NM_005011, intron 1 of 10)	1047	NM_001293163	4899		NM_005011	ENSG00000106459	NRF1	ALPHA-PAL	nuclear respiratory factor 1	protein-coding
15499	chr10	103204234	103206716	+	23	NA	Intergenic	LTR7Y|LTR|ERV1	-12169	NM_012229	22978		NM_012229	ENSG00000076685	NT5C2	GMP|NT5B|PNT5|SPG45|SPG65|cN-II	5'-nucleotidase, cytosolic II	protein-coding
24441	chr3	184314791	184316955	+	23	NA	intron (NM_182917, intron 2 of 31)	intron (NM_182917, intron 2 of 31)	709	NM_182917	1981		NM_004953	ENSG00000114867	EIF4G1	EIF-4G1|EIF4F|EIF4G|EIF4GI|P220|PARK18	eukaryotic translation initiation factor 4 gamma 1	protein-coding
15605	chr19	10194210	10195469	+	23	NA	exon (NM_001379, exon 1 of 40)	exon (NM_001379, exon 1 of 40)	114	NM_001379	1786		NM_001379	ENSG00000130816	DNMT1	ADCADN|AIM|CXXC9|DNMT|HSN1E|MCMT|m.HsaI	DNA methyltransferase 1	protein-coding
14779	chr7	75373928	75375576	+	23	NA	Intergenic	Intergenic	15552	NR_040583	54441		NM_018991	ENSG00000290951	STAG3L1	STAG3L1P|STAG3L2|STAG3L3	STAG3 cohesin complex component like 1 (pseudogene)	pseudo
20718	chr10	32937802	32940062	+	23	NA	intron (NM_002211, intron 1 of 15)	intron (NM_002211, intron 1 of 15)	-3374	NM_033668	3688		NM_002211	ENSG00000150093	ITGB1	CD29|FNRB|GPIIA|MDF2|MSK12|VLA-BETA|VLAB	integrin subunit beta 1	protein-coding
10062	chr1	143206047	143207217	+	23	NA	Intergenic	Intergenic	215960	NR_027354	645166		NR_027354	ENSG00000288905	LSP1P5	-	LSP1 pseudogene 5	pseudo
7576	chr1	155856952	155857879	+	23	NA	promoter-TSS (NM_032292)	promoter-TSS (NM_032292)	-201	NM_032292	54856		NM_025174	ENSG00000116580	GON4L	GON-4|GON4|YARP	gon-4 like	protein-coding
17689	chr8	59117342	59118790	+	23	NA	intron (NM_014729, intron 1 of 8)	CpG	1081	NM_014729	9760		NM_014729	ENSG00000198846	TOX	TOX1	thymocyte selection associated high mobility group box	protein-coding
7810-2	chr6	107539992	107540847	+	23	NA	intron (NM_018013, intron 4 of 6)	intron (NM_018013, intron 4 of 6)	50302	NM_018013	55084		NM_018013	ENSG00000112320	SOBP	JXC1|MRAMS	sine oculis binding protein homolog	protein-coding
8926	chr11	76380959	76381829	+	23	NA	promoter-TSS (NR_130898)	promoter-TSS (NR_130898)	71	NM_001282456	100506127		NM_001013634	ENSG00000179240	GVQW3	-	GVQW motif containing 3	protein-coding
16478	chr11	12019171	12020620	+	23	NA	Intergenic	Intergenic	-10525	NM_013253	27122		NM_013253	ENSG00000050165	DKK3	CRRL|REIC|RIG	dickkopf WNT signaling pathway inhibitor 3	protein-coding
16767	chrX	101417364	101418969	+	23	NA	promoter-TSS (NR_028407)	promoter-TSS (NR_028407)	-112	NR_028407	100131755		NM_152583	ENSG00000196440	ARMCX4	CXorf35|GASP4	armadillo repeat containing X-linked 4	protein-coding
7088	chr13	91143984	91144577	+	23	NA	intron (NR_047004, intron 2 of 3)	intron (NR_047004, intron 2 of 3)	-54663	NR_104057	101930747		NR_104057		LINC00380	-	long intergenic non-protein coding RNA 380	ncRNA
12009-2	chr21	43739811	43741070	+	23	NA	intron (NM_003681, intron 2 of 10)	intron (NM_003681, intron 2 of 10)	-1046	NM_001331030	8566		NM_003681	ENSG00000160209	PDXK	C21orf124|C21orf97|HEL-S-1a|HMSN6C|PKH|PNK|PRED79	pyridoxal kinase	protein-coding
26846	chr4	159104066	159104961	+	23	NA	intron (NM_001351724, intron 1 of 30)	(GA)n|Simple_repeat|Simple_repeat	462	NM_001351724	9693		NM_014247	ENSG00000109756	RAPGEF2	CNrasGEF|NRAPGEP|PDZ-GEF1|PDZGEF1|RA-GEF|RA-GEF-1|RAGEF|Rap-GEP|nRap GEP	Rap guanine nucleotide exchange factor 2	protein-coding
8079	chr2	159516054	159516742	+	23	NA	intron (NM_001289975, intron 2 of 35)	intron (NM_001289975, intron 2 of 35)	-98896	NR_110587	643072		NR_110587	ENSG00000224152	BAZ2B-AS1	lnc-BAZ2B	BAZ2B antisense RNA 1	ncRNA
8773	chr1	147239850	147240813	+	23	NA	intron (NM_001348451, intron 2 of 23)	LTR5_Hs|LTR|ERVK	-2353	NM_001348454	9557		NM_004284	ENSG00000131778	CHD1L	ALC1|CHDL	chromodomain helicase DNA binding protein 1 like	protein-coding
18302	chr13	48411198	48413591	+	23	NA	exon (NM_005767, exon 7 of 7)	exon (NM_005767, exon 7 of 7)	719	NM_001162498	10161		NM_005767	ENSG00000139679	LPAR6	ARWH1|HYPT8|LAH3|LPA-6|P2RY5|P2Y5	lysophosphatidic acid receptor 6	protein-coding
8612	chr2	24046960	24047866	+	23	NA	promoter-TSS (NM_001142319)	promoter-TSS (NM_001142319)	13	NM_001142319	80304		NM_025203	ENSG00000163026	WDCP	C2orf44|MMAP|PP384	WD repeat and coiled coil containing	protein-coding
8587	chr6	21947537	21948627	+	23	NA	intron (NR_015410, intron 5 of 11)	intron (NR_015410, intron 5 of 11)	199111	NR_034143	729177		NR_034143		NBAT1	CASC14|NBAT-1	neuroblastoma associated transcript 1	ncRNA
15827	chr7	73577534	73579317	+	23	NA	promoter-TSS (NM_001362663)	promoter-TSS (NM_001362663)	-38	NM_001362663	26608		NM_012453	ENSG00000106638	TBL2	WBSCR13|WS-betaTRP	transducin beta like 2	protein-coding
14207	chr20	58995263	58996318	+	23	NA	TTS (NM_198976)	TTS (NM_198976)	11464	NM_001336	1522		NM_001336	ENSG00000101160	CTSZ	CTSX	cathepsin Z	protein-coding
13755	chr19	47047326	47048935	+	23	NA	intron (NM_017854, intron 1 of 2)	CpG	494	NM_017854	54958		NM_017854	ENSG00000130748	TMEM160	-	transmembrane protein 160	protein-coding
9241	chr4	95439447	95440463	+	23	NA	intron (NM_003728, intron 1 of 15)	intron (NM_003728, intron 1 of 15)	109018	NM_003728	8633		NM_003728	ENSG00000182168	UNC5C	UNC5H3	unc-5 netrin receptor C	protein-coding
16058	chr5	125483930	125485877	+	23	NA	Intergenic	Intergenic	-8358	NR_109887	101927460		NR_109887	ENSG00000260192	LINC02240	-	long intergenic non-protein coding RNA 2240	ncRNA
8726	chr8	83126175	83127134	+	23	NA	Intergenic	MER61F|LTR|ERV1	214550	NR_134295	101927141		NR_134295	ENSG00000254394	LOC101927141	-	uncharacterized LOC101927141	ncRNA
7959-3	chr19	32350400	32351471	+	23	NA	intron (NM_001136156, intron 2 of 6)	intron (NM_001136156, intron 2 of 6)	5325	NM_001136156	22847		NM_014910	ENSG00000168813	ZNF507	Zfp507	zinc finger protein 507	protein-coding
14464	chr2	43023414	43023572	+	23	NA	Intergenic	Intergenic	16050	NR_110585	102723854		NR_110585	ENSG00000231826	LINC01819	KPRT4|LINC02590	long intergenic non-protein coding RNA 1819	ncRNA
8716	chr1	92886690	92887738	+	23	NA	intron (NM_001006605, intron 1 of 4)	AluJo|SINE|Alu	-10064	NM_001252271	388650		NM_001006605	ENSG00000154511	DIPK1A	FAM69A	divergent protein kinase domain 1A	protein-coding
11163	chr19	29212643	29213671	+	23	NA	promoter-TSS (NM_006003)	promoter-TSS (NM_006003)	-6	NM_006003	7386		NM_006003	ENSG00000169021	UQCRFS1	MC3DN10|RIP1|RIS1|RISP|UQCR5	ubiquinol-cytochrome c reductase, Rieske iron-sulfur polypeptide 1	protein-coding
12900	chr10	126972564	126973713	+	23	NA	intron (NM_001377560, intron 2 of 43)	intron (NM_001377560, intron 2 of 43)	67710	NM_001377561	1793		NM_001380	ENSG00000150760	DOCK1	DOCK180|ced5	dedicator of cytokinesis 1	protein-coding
13628	chr1	116292712	116294060	+	23	NA	Intergenic	L2b|LINE|L2	-79858	NM_000701	476		NM_000701	ENSG00000163399	ATP1A1	CMT2DD|HOMGSMR2	ATPase Na+/K+ transporting subunit alpha 1	protein-coding
9831-2	chr6	107493018	107494211	+	23	NA	intron (NM_018013, intron 1 of 6)	intron (NM_018013, intron 1 of 6)	3497	NM_018013	55084		NM_018013	ENSG00000112320	SOBP	JXC1|MRAMS	sine oculis binding protein homolog	protein-coding
9983	chr19	7861285	7862691	+	23	NA	exon (NM_001159944, exon 15 of 20)	exon (NM_001159944, exon 15 of 20)	12402	NR_104345	80164		NM_025094	ENSG00000183248	PRR36	-	proline rich 36	protein-coding
10177	chr1	29271341	29272543	+	23	NA	intron (NM_133177, intron 7 of 30)	intron (NM_133177, intron 7 of 30)	35420	NM_133178	10076		NM_005704	ENSG00000060656	PTPRU	FMI|PCP-2|PTP|PTP-J|PTP-PI|PTP-RO|PTPPSI|PTPRO|PTPU2|R-PTP-PSI|R-PTP-U|hPTP-J	protein tyrosine phosphatase receptor type U	protein-coding
21277	chr2	155214604	155216827	+	23	NA	Intergenic	Intergenic	517020	NM_002239	3760		NM_002239	ENSG00000162989	KCNJ3	GIRK1|KGA|KIR3.1	potassium inwardly rectifying channel subfamily J member 3	protein-coding
20411	chr2	134447999	134448018	+	23	NA	intron (NM_001371457, intron 16 of 16)	intron (NM_001371457, intron 16 of 16)	193936	NM_002410	4249		NM_002410	ENSG00000152127	MGAT5	GNT-V|GNT-VA|MGAT5A|glcNAc-T V	alpha-1,6-mannosylglycoprotein 6-beta-N-acetylglucosaminyltransferase	protein-coding
7092	chr2	203683914	203684634	+	23	NA	Intergenic	Intergenic	-22201	NM_001243078	940		NM_006139	ENSG00000178562	CD28	Tp44	CD28 molecule	protein-coding
14289	chr1	145978860	145980005	+	23	NA	TTS (NM_001330685)	TTS (NM_001330685)	14742	NM_032305	84265		NM_032305	ENSG00000121851	POLR3GL	RPC32HOM|SOFM|flj32422	RNA polymerase III subunit GL	protein-coding
17226	chr14	50667317	50669322	+	23	NA	promoter-TSS (NM_021818)	promoter-TSS (NM_021818)	-13	NM_021818	60485		NM_021818	ENSG00000151748	SAV1	SAV|WW45|WWP4	salvador family WW domain containing protein 1	protein-coding
7690	chr6	100592637	100593447	+	23	NA	intron (NM_006828, intron 34 of 41)	intron (NM_006828, intron 34 of 41)	-128121	NM_005068	6492		NM_005068	ENSG00000112246	SIM1	bHLHe14	SIM bHLH transcription factor 1	protein-coding
7571	chr11	36594342	36595001	+	23	NA	promoter-TSS (NM_001276724)	promoter-TSS (NM_001276724)	-101	NM_001276724	119710		NM_138787	ENSG00000166352	IFTAP	C11orf74|HEPIS|NWC	intraflagellar transport associated protein	protein-coding
8085	chr2	68062549	68063393	+	23	NA	promoter-TSS (NM_001190265)	promoter-TSS (NM_001190265)	33	NM_173177	10438		NM_006333	ENSG00000197223	C1D	LRP1|Rrp47|SUN-CoR|SUNCOR|hC1D	C1D nuclear receptor corepressor	protein-coding
10001	chr15	84657812	84659142	+	23	NA	promoter-TSS (NM_021077)	promoter-TSS (NM_021077)	-278	NM_021077	4828		NM_021077	ENSG00000197696	NMB	-	neuromedin B	protein-coding
9657-2	chr8	24039090	24039830	+	23	NA	Intergenic	Intergenic	-184654	NM_003155	6781		NM_003155	ENSG00000159167	STC1	STC	stanniocalcin 1	protein-coding
11160-2	chr2	19503680	19505182	+	23	NA	Intergenic	Intergenic	-145808	NM_145260	130497		NM_145260	ENSG00000143867	OSR1	ODD	odd-skipped related transcription factor 1	protein-coding
14057	chr14	102087261	102088477	+	23	NA	promoter-TSS (NM_005348)	promoter-TSS (NM_005348)	-825	NM_005348	3320		NM_005348	ENSG00000080824	HSP90AA1	EL52|HEL-S-65p|HSP86|HSP89A|HSP90A|HSP90N|HSPC1|HSPCA|HSPCAL1|HSPCAL4|HSPN|Hsp103|Hsp89|Hsp90|LAP-2|LAP2	heat shock protein 90 alpha family class A member 1	protein-coding
8690	chr13	93787822	93788786	+	23	NA	intron (NM_005708, intron 2 of 8)	MLT1A1|LTR|ERVL-MaLR	70169	NR_046536	100873973		NR_046536		GPC6-AS2	-	GPC6 antisense RNA 2	ncRNA
21583	chr2	201865753	201868027	+	23	NA	intron (NM_001366386, intron 10 of 13)	intron (NM_001366386, intron 10 of 13)	60311	NM_001261436	65061		NM_139158	ENSG00000138395	CDK15	ALS2CR7|PFTAIRE2|PFTK2	cyclin dependent kinase 15	protein-coding
19886	chr4	140036045	140040741	+	23	NA	intron (NM_018717, intron 1 of 4)	intron (NM_018717, intron 1 of 4)	-89622	NR_147610	101927516		NR_147610		LOC101927516	-	uncharacterized LOC101927516	ncRNA
6994	chr12	65899920	65900897	+	22	NA	intron (NM_003483, intron 3 of 4)	intron (NM_003483, intron 3 of 4)	-18083	NR_158985	100129940		NR_120478	ENSG00000197301	HMGA2-AS1	-	HMGA2 antisense RNA 1	ncRNA
12561	chr12	62466306	62467584	+	22	NA	5' UTR (NM_001278471, exon 1 of 34)	5' UTR (NM_001278471, exon 1 of 34)	119	NM_001278469	23041		NM_015026	ENSG00000061987	MON2	-	MON2 homolog, regulator of endosome-to-Golgi trafficking	protein-coding
14334	chr1	52006119	52007088	+	22	NA	Intergenic	LTR5_Hs|LTR|ERVK	-15903	NM_002867	5865		NM_002867	ENSG00000169213	RAB3B	-	RAB3B, member RAS oncogene family	protein-coding
16779	chr19	44905315	44906915	+	22	NA	promoter-TSS (NM_001302689)	promoter-TSS (NM_001302689)	94	NM_001302689	348		NM_000041	ENSG00000130203	APOE	AD2|APO-E|ApoE4|LDLCQ5|LPG	apolipoprotein E	protein-coding
7169	chr10	61901013	61901792	+	22	NA	promoter-TSS (NM_032199)	promoter-TSS (NM_032199)	-297	NM_032199	84159		NM_032199	ENSG00000150347	ARID5B	DESRT|MRF-2|MRF2	AT-rich interaction domain 5B	protein-coding
32951	chr2	20188062	20188510	+	22	NA	Intergenic	Intergenic	36844	NM_002997	6382		NM_002997	ENSG00000115884	SDC1	CD138|SDC|SYND1|syndecan	syndecan 1	protein-coding
10274	chr8	8701396	8702675	+	22	NA	promoter-TSS (NM_194284)	promoter-TSS (NM_194284)	98	NM_194284	137075		NM_194284	ENSG00000253958	CLDN23	CLDNL|hCG1646163	claudin 23	protein-coding
5949-2	chrX	92649901	92650738	+	22	NA	Intergenic	LTR22C0|LTR|ERVK	174584	NR_039659	100616234		NR_039659	ENSG00000283468	MIR4454	-	microRNA 4454	ncRNA
22329	chr5	11523448	11524749	+	22	NA	intron (NM_001332, intron 3 of 21)	intron (NM_001332, intron 3 of 21)	64819	NM_001288715	1501		NM_001332	ENSG00000169862	CTNND2	GT24|NPRAP	catenin delta 2	protein-coding
18925	chr19	33050975	33054114	+	22	NA	intron (NM_033103, intron 1 of 14)	intron (NM_033103, intron 1 of 14)	12344	NM_033103	85415		NM_033103	ENSG00000131941	RHPN2	P76RBE|RHOBP	rhophilin Rho GTPase binding protein 2	protein-coding
20280	chr17	18718348	18720102	+	22	NA	intron (NM_001353223, intron 5 of 10)	intron (NM_001353223, intron 5 of 10)	-2798	NM_001037330	147166		NM_001037330	ENSG00000291110	TRIM16L	TRIM70	tripartite motif containing 16 like (pseudogene)	pseudo
7151-2	chr6	154122917	154124005	+	22	NA	non-coding (NR_104350, exon 3 of 3)	non-coding (NR_104350, exon 3 of 3)	33699	NM_001285527	4988		NM_000914	ENSG00000112038	OPRM1	LMOR|M-OR-1|MOP|MOR|MOR1|OPRM	opioid receptor mu 1	protein-coding
14536	chr5	57694820	57696544	+	22	NA	Intergenic	MamRep1527|LTR|LTR	45022	NR_104668	101928505		NR_104668	ENSG00000287709	LOC101928505	-	uncharacterized LOC101928505	ncRNA
8343	chr8	99892884	99893712	+	22	NA	intron (NM_004374, intron 1 of 3)	MIRb|SINE|MIR	409	NM_004374	1345		NM_004374	ENSG00000164919	COX6C	-	cytochrome c oxidase subunit 6C	protein-coding
17799	chr16	72999567	73001393	+	22	NA	intron (NM_006885, intron 1 of 9)	intron (NM_006885, intron 1 of 9)	47648	NM_006885	463		NM_006885	ENSG00000140836	ZFHX3	ATBF1|ATBT|ATFB8|C16orf47|SCA4|ZFH-3|ZNF927	zinc finger homeobox 3	protein-coding
12318	chr1	183698911	183700502	+	22	NA	intron (NM_001297669, intron 2 of 18)	intron (NM_001297669, intron 2 of 18)	-46390	NM_203454	403314		NM_203454	ENSG00000173627	APOBEC4	C1orf169	apolipoprotein B mRNA editing enzyme catalytic polypeptide like 4	protein-coding
7646-3	chr2	204281941	204282986	+	22	NA	Intergenic	Intergenic	-263012	NM_205863	117583		NM_057177	ENSG00000116117	PARD3B	ALS2CR19|PAR3B|PAR3L|PAR3beta	par-3 family cell polarity regulator beta	protein-coding
13438	chr7	128259164	128260758	+	22	NA	Intergenic	LTR8|LTR|ERV1	18683	NM_000230	3952		NM_000230	ENSG00000174697	LEP	LEPD|OB|OBS	leptin	protein-coding
8426	chr2	85889004	85889824	+	22	NA	promoter-TSS (NM_001354227)	promoter-TSS (NM_001354227)	134	NR_110569	101928113		NR_110569		ST3GAL5-AS1	-	ST3GAL5 antisense RNA 1 (head to head)	ncRNA
6670-4	chr6	110360684	110361372	+	22	NA	Intergenic	Intergenic	-2756	NM_001354594	728464		NM_001123364	ENSG00000053328	METTL24	C6orf186	methyltransferase like 24	protein-coding
6439	chr13	79861674	79862513	+	22	NA	Intergenic	Intergenic	-10493	NR_120413	101927195		NR_120413	ENSG00000229175	LINC00382	TCONS_00021500	long intergenic non-protein coding RNA 382	ncRNA
8959-2	chr4	184537146	184538142	+	22	NA	promoter-TSS (NR_147158)	promoter-TSS (NR_147158)	-61	NR_147158	105377585		NR_147158		LINC02427	-	long intergenic non-protein coding RNA 2427	ncRNA
11713	chr3	194315068	194316111	+	22	NA	Intergenic	Intergenic	-2785	NR_024480	100131551		NR_024480	ENSG00000214145	LINC00887	ACLY-BP|HEIRCC	long intergenic non-protein coding RNA 887	ncRNA
20736	chr11	126145970	126148539	+	22	NA	Intergenic	Intergenic	64396	NM_001363516	84881		NM_032795	ENSG00000165526	RPUSD4	-	RNA pseudouridine synthase D4	protein-coding
11353	chr10	41874631	41875848	+	22	NA	Intergenic	(ATGGA)n|Simple_repeat|Simple_repeat	492806	NR_024380	441666		NR_024380	ENSG00000291065	LOC441666	-	zinc finger protein 91 pseudogene	pseudo
7793	chr3	133479909	133480633	+	22	NA	intron (NR_135276, intron 1 of 4)	intron (NR_135276, intron 1 of 4)	10875	NR_135276	85003		NR_135276	ENSG00000249993	BFSP2-AS1	-	BFSP2 antisense RNA 1	ncRNA
8755	chr13	90502229	90503612	+	22	NA	intron (NR_120414, intron 2 of 5)	MER77|LTR|ERVL	9632	NR_120414	101927224		NR_120414		LINC01049	-	long intergenic non-protein coding RNA 1049	ncRNA
12356	chr2	70978394	70980105	+	22	NA	exon (NM_001369683, exon 2 of 6)	exon (NM_001369683, exon 2 of 6)	619	NM_001115116	79998		NM_024933	ENSG00000144031	ANKRD53	-	ankyrin repeat domain 53	protein-coding
22323	chr14_GL000225v1_random	90895	94808	+	22	NA	NA	BSR/Beta|Satellite|Satellite	NA	NA
11809-2	chr2	60294755	60296016	+	22	NA	Intergenic	Intergenic	87651	NR_132991	106660609		NR_132991	ENSG00000228590	MIR4432HG	-	MIR4432 host gene	ncRNA
7506	chr4	88107131	88108414	+	22	NA	intron (NM_001348989, intron 9 of 15)	intron (NM_001348989, intron 9 of 15)	50867	NM_004827	9429		NM_004827	ENSG00000118777	ABCG2	ABC15|ABCP|BCRP|BCRP1|BMDP|CD338|CDw338|CDw388|EST157481|GOUT1|MRX|MXR|MXR-1|MXR1|UAQTL1	ATP binding cassette subfamily G member 2 (JR blood group)	protein-coding
9926	chr10	94362134	94363318	+	22	NA	intron (NM_022451, intron 1 of 20)	intron (NM_022451, intron 1 of 20)	213	NM_022451	64318		NM_022451	ENSG00000173145	NOC3L	AD24|C10orf117|FAD24	NOC3 like DNA replication regulator	protein-coding
6955	chr10	69554357	69555136	+	22	NA	Intergenic	Intergenic	18676	NM_020999	50674		NM_020999	ENSG00000122859	NEUROG3	Atoh5|Math4B|NGN-3|bHLHa7|ngn3	neurogenin 3	protein-coding
18548	chr12	4030779	4032305	+	22	NA	Intergenic	Intergenic	-158094	NM_001286521	57097		NM_020367	ENSG00000111224	PARP11	ARTD11|C12orf6|MIB006	poly(ADP-ribose) polymerase family member 11	protein-coding
6292-2	chr17	27349130	27349596	+	22	NA	Intergenic	CpG	55249	NM_001348350	26118		NM_015626	ENSG00000109046	WSB1	SWIP1|WSB-1	WD repeat and SOCS box containing 1	protein-coding
9432	chr2	197673050	197673926	+	22	NA	intron (NM_144629, intron 1 of 8)	intron (NM_144629, intron 1 of 8)	2099	NM_144629	130132		NM_144629	ENSG00000162944	RFTN2	C2orf11|Raftlin-2	raftlin family member 2	protein-coding
6596-4	chr22	12691990	12692648	+	22	NA	Intergenic	BSR/Beta|Satellite|Satellite	794913	NR_110761	102723769		NR_110761		LOC102723769	-	uncharacterized LOC102723769	ncRNA
11548	chr9	38039275	38040392	+	22	NA	intron (NM_003028, intron 1 of 5)	intron (NM_003028, intron 1 of 5)	29394	NM_003028	6461		NM_003028	ENSG00000107338	SHB	bA3J10.2	SH2 domain containing adaptor protein B	protein-coding
10913	chr5	132386323	132387290	+	22	NA	intron (NM_003060, intron 4 of 9)	intron (NM_003060, intron 4 of 9)	-16890	NR_110997	553103		NR_110997	ENSG00000233006	MIR3936HG	SLC22A5-AS1	MIR3936 host gene	ncRNA
7833-3	chr3	114451119	114452064	+	22	NA	intron (NM_001164343, intron 8 of 11)	intron (NM_001164343, intron 8 of 11)	-2002	NR_121661	101929754		NR_121661	ENSG00000242290	ZBTB20-AS5	-	ZBTB20 antisense RNA 5	ncRNA
8878-2	chr9	14693214	14694113	+	22	NA	promoter-TSS (NM_001354125)	promoter-TSS (NM_001354125)	-231	NM_178566	340481		NM_178566	ENSG00000175893	ZDHHC21	DHHC-21|DHHC21|DNZ1|HSPC097	zinc finger DHHC-type palmitoyltransferase 21	protein-coding
17381	chr9	27572479	27574409	+	22	NA	promoter-TSS (NM_018325)	promoter-TSS (NM_018325)	37	NM_018325	203228		NM_018325	ENSG00000147894	C9orf72	ALSFTD|DENND9|DENNL72|FTDALS|FTDALS1	C9orf72-SMCR8 complex subunit	protein-coding
23499	chr1	171159113	171161659	+	22	NA	intron (NR_002601, intron 6 of 6)	LTR49|LTR|ERV1	22646	NR_002601	388714		NM_001013645	ENSG00000293458	FMO6P	FMO6	flavin containing dimethylaniline monoxygenase 6, pseudogene	pseudo
7935-3	chr8	112735534	112736875	+	22	NA	intron (NM_198123, intron 13 of 70)	intron (NM_198123, intron 13 of 70)	92711	NR_031745	100302225		NR_031745	ENSG00000238399	MIR2053	hsa-mir-2053	microRNA 2053	ncRNA
15168	chr11	449400	451811	+	22	NA	exon (NM_001329544, exon 1 of 12)	exon (NM_001329544, exon 1 of 12)	326	NR_138046	81490		NM_030783	ENSG00000174915	PTDSS2	PSS2	phosphatidylserine synthase 2	protein-coding
7976	chr2	211928047	211929036	+	22	NA	intron (NM_005235, intron 3 of 27)	intron (NM_005235, intron 3 of 27)	497819	NR_031643	100313771		NR_031643	ENSG00000221782	MIR548F2	MIR548F-2|MIRN548F2|hsa-mir-548f-2	microRNA 548f-2	ncRNA
12198	chr11	16114839	16115938	+	22	NA	intron (NM_001145811, intron 6 of 14)	MER5A|DNA|hAT-Charlie	-145767	NR_106721	102464826		NR_106721	ENSG00000284094	MIR6073	hsa-mir-6073	microRNA 6073	ncRNA
25189	chr16	14095910	14098210	+	22	NA	intron (NM_001365418, intron 3 of 5)	intron (NM_001365418, intron 3 of 5)	25741	NM_001365417	57496		NM_014048	ENSG00000186260	MRTFB	MKL2|MRTF-B|NPD001	myocardin related transcription factor B	protein-coding
19439	chr3	37924523	37926050	+	22	NA	intron (NM_005808, intron 1 of 6)	intron (NM_005808, intron 1 of 6)	-44118	NR_029499	407015		NR_029499	ENSG00000199075	MIR26A1	MIR26A|MIRN26A1|mir-26a-1	microRNA 26a-1	ncRNA
12762	chr1	69411545	69413457	+	22	NA	Intergenic	MIRb|SINE|MIR	-20754	NR_147164	105378788		NR_147164	ENSG00000229639	LINC01758	-	long intergenic non-protein coding RNA 1758	ncRNA
10356	chr5_KI270897v1_alt	449068	450065	+	22	NA	intron (NM_021967, intron 1 of 2).5	intron (NM_021967, intron 1 of 2).5	489	NM_021967	8293		NM_021967	ENSG00000172058	SERF1A	4F5|FAM2A|H4F5|SERF1|SMAM1	small EDRK-rich factor 1A	protein-coding
8009	chr3	155805664	155806622	+	22	NA	exon (NM_001308229, exon 1 of 5)	exon (NM_001308229, exon 1 of 5)	135	NM_001308229	285315		NM_173657	ENSG00000174928	C3orf33	AC3-33	chromosome 3 open reading frame 33	protein-coding
9612	chr15	74099807	74100591	+	22	NA	promoter-TSS (NR_160652)	promoter-TSS (NR_160652)	7	NR_160652	732265		NR_160652		COMMD4P2	-	COMM domain containing 4 pseudogene 2	pseudo
6666	chr10	5446095	5446940	+	22	NA	promoter-TSS (NM_005863)	promoter-TSS (NM_005863)	-34	NR_073040	10276		NM_005863	ENSG00000173848	NET1	ARHGEF8|NET1A	neuroepithelial cell transforming 1	protein-coding
14179	chr22	41301200	41302851	+	22	NA	intron (NM_017590, intron 1 of 22)	CpG	344	NM_001317930	5905		NM_002883	ENSG00000100401	RANGAP1	Fug1|RANGAP|SD	Ran GTPase activating protein 1	protein-coding
21704	chr16	88649926	88652151	+	22	NA	promoter-TSS (NM_000101)	promoter-TSS (NM_000101)	15	NM_000101	1535		NM_000101	ENSG00000051523	CYBA	CGD4|p22-PHOX	cytochrome b-245 alpha chain	protein-coding
22252	chr17	44005950	44008203	+	22	NA	intron (NM_153006, intron 4 of 6)	CpG-11225	2454	NM_153006	162417		NM_153006	ENSG00000161653	NAGS	AGAS|ARGA	N-acetylglutamate synthase	protein-coding
22904	chr13	27952636	27954873	+	22	NA	non-coding (NR_135254, exon 1 of 1)	non-coding (NR_135254, exon 1 of 1)	228	NR_135254	100132234		NR_135254	ENSG00000260704	LINC00543	-	long intergenic non-protein coding RNA 543	ncRNA
23533	chr8	112808233	112810209	+	22	NA	intron (NM_198123, intron 12 of 70)	intron (NM_198123, intron 12 of 70)	165728	NR_031745	100302225		NR_031745	ENSG00000238399	MIR2053	hsa-mir-2053	microRNA 2053	ncRNA
7864	chr1	217616908	217617868	+	22	NA	intron (NM_001297754, intron 2 of 5)	L2b|LINE|L2	13702	NM_018040	55105		NM_018040	ENSG00000092978	GPATCH2	CT110|GPATC2|PPP1R30|Pfa1	G-patch domain containing 2	protein-coding
7032	chr10	61897031	61897861	+	22	NA	Intergenic	Intergenic	-4253	NM_032199	84159		NM_032199	ENSG00000150347	ARID5B	DESRT|MRF-2|MRF2	AT-rich interaction domain 5B	protein-coding
16923	chr17	59754061	59757044	+	22	NA	intron (NM_001329397, intron 5 of 10)	intron (NM_001329397, intron 5 of 10)	47898	NM_001329396	81671		NM_030938	ENSG00000062716	VMP1	EPG3|TANGO5|TMEM49	vacuole membrane protein 1	protein-coding
12207	chr13	34152237	34154012	+	22	NA	Intergenic	Intergenic	-194919	NR_146542	105370158		NR_146542	ENSG00000271850	LINC02343	-	long intergenic non-protein coding RNA 2343	ncRNA
10087	chr10	114613088	114614093	+	22	NA	intron (NM_001322884, intron 1 of 20)	intron (NM_001322884, intron 1 of 20)	146	NM_001352442	3983		NM_002313	ENSG00000099204	ABLIM1	ABLIM|LIMAB1|LIMATIN|abLIM-1	actin binding LIM protein 1	protein-coding
6772	chr2	142472263	142473406	+	22	NA	Intergenic	MamRTE1|LINE|RTE-BovB	-341818	NM_018557	53353		NM_018557	ENSG00000168702	LRP1B	LRP-1B|LRP-DIT|LRPDIT	LDL receptor related protein 1B	protein-coding
11160	chr13	36355224	36356739	+	22	NA	intron (NR_045181, intron 1 of 4)	LTR22B|LTR|ERVK	-9184	NM_001142295	23111		NM_015087	ENSG00000133104	SPART	SPG20|TAHCCP1	spartin	protein-coding
6909	chr4	78131308	78132178	+	22	NA	intron (NM_025074, intron 2 of 73)	intron (NM_025074, intron 2 of 73)	74173	NM_001166133	80144		NM_020875	ENSG00000138759	FRAS1	FRASRS1	Fraser extracellular matrix complex subunit 1	protein-coding
7617	chr5	39624393	39625209	+	22	NA	Intergenic	MLT1G1|LTR|ERVL-MaLR	104370	NR_104632	101926940		NR_104632	ENSG00000271334	LINC02104	-	long intergenic non-protein coding RNA 2104	ncRNA
10580	chr2	207800530	207802037	+	22	NA	Intergenic	Intergenic	-31377	NM_003468	7855		NM_003468	ENSG00000163251	FZD5	C2orf31|HFZ5|MCOPCB11	frizzled class receptor 5	protein-coding
13486-2	chr10	119253106	119254278	+	22	NA	intron (NM_005308, intron 1 of 15)	intron (NM_005308, intron 1 of 15)	46121	NM_005308	2869		NM_005308	ENSG00000198873	GRK5	FP2025|GPRK5	G protein-coupled receptor kinase 5	protein-coding
14527	chr5	110738263	110739664	+	22	NA	promoter-TSS (NM_138773)	promoter-TSS (NM_138773)	-44	NM_001303249	91137		NM_138773	ENSG00000164209	SLC25A46	HMSN6B|PCH1E	solute carrier family 25 member 46	protein-coding
17714	chr20	49964743	49966534	+	22	NA	Intergenic	Intergenic	-17342	NM_005985	6615		NM_005985	ENSG00000124216	SNAI1	SLUGH2|SNA|SNAH|SNAIL|SNAIL1|dJ710H13.1	snail family transcriptional repressor 1	protein-coding
5789	chr2	26017840	26018561	+	22	NA	Intergenic	Intergenic	-15884	NM_016131	10890		NM_016131	ENSG00000084733	RAB10	-	RAB10, member RAS oncogene family	protein-coding
10451	chr13	91155010	91156181	+	22	NA	intron (NR_047004, intron 2 of 3)	intron (NR_047004, intron 2 of 3)	56103	NR_047004	100874150		NR_047004		LINC00379	-	long intergenic non-protein coding RNA 379	ncRNA
21107	chr15	63041604	63044943	+	22	NA	intron (NM_001018005, intron 1 of 9)	CpG	526	NM_001018007	7168		NM_000366	ENSG00000140416	TPM1	C15orf13|CMD1Y|CMH3|HEL-S-265|HTM-alpha|LVNC9|TMSA	tropomyosin 1	protein-coding
10080-2	chr2	169798448	169799829	+	22	NA	promoter-TSS (NM_001294145)	promoter-TSS (NM_001294145)	-164	NM_001294145	6741		NM_003142	ENSG00000138385	SSB	LARP3|La|La/SSB	small RNA binding exonuclease protection factor La	protein-coding
14905	chr12	19915112	19916787	+	22	NA	Intergenic	(TGTTTT)n|Simple_repeat|Simple_repeat	-98736	NR_040098	100506393		NR_040098	ENSG00000256287	LINC02398	-	long intergenic non-protein coding RNA 2398	ncRNA
13694	chr11	95253769	95255662	+	22	NA	Intergenic	Intergenic	-22240	NM_001271594	143686		NM_144665	ENSG00000149212	SESN3	SEST3	sestrin 3	protein-coding
9667	chr1	213714377	213715074	+	22	NA	Intergenic	Intergenic	-210024	NR_046189	100861504		NR_046189		LINC00538	PROX1UT|Yiya	long intergenic non-protein coding RNA 538	ncRNA
9751-2	chr5	90352925	90354089	+	22	NA	Intergenic	LTR39|LTR|ERV1	56249	NM_004365	1070		NM_004365	ENSG00000153140	CETN3	CDC31|CEN3	centrin 3	protein-coding
9077	chr10	26696927	26697778	+	22	NA	promoter-TSS (NM_014317)	promoter-TSS (NM_014317)	-72	NM_001321978	23590		NM_014317	ENSG00000148459	PDSS1	COQ1|COQ10D2|COQ1A|DPS|SPS|TPRT|TPT|TPT 1|hDPS1	decaprenyl diphosphate synthase subunit 1	protein-coding
7381	chr14	34461289	34462063	+	22	NA	intron (NM_138288, intron 1 of 1)	intron (NM_138288, intron 1 of 1)	564	NM_138288	171546		NM_138288	ENSG00000165389	SPTSSA	C14orf147|SPG90A|SPG90B|SSSPTA	serine palmitoyltransferase small subunit A	protein-coding
10379	chr8	88000526	88001582	+	22	NA	Intergenic	Intergenic	-127039	NM_152418	138009		NM_152418	ENSG00000176566	DCAF4L2	WDR21C	DDB1 and CUL4 associated factor 4 like 2	protein-coding
10185-2	chr22	17903376	17904373	+	22	NA	intron (NM_015241, intron 3 of 31)	intron (NM_015241, intron 3 of 31)	3012	NM_001136004	57553		NM_015241	ENSG00000243156	MICAL3	MICAL-3	microtubule associated monooxygenase, calponin and LIM domain containing 3	protein-coding
9919-2	chr8	32548200	32549166	+	22	NA	5' UTR (NM_004495, exon 1 of 6)	5' UTR (NM_004495, exon 1 of 6)	372	NM_013957	3084		NM_004495	ENSG00000157168	NRG1	ARIA|GGF|GGF2|HGL|HRG|HRG1|HRGA|MST131|MSTP131|NDF|NRG1-IT2|SMDF	neuregulin 1	protein-coding
6470-2	chr18	7070520	7071798	+	22	NA	intron (NM_005559, intron 3 of 62)	MIRb|SINE|MIR	46638	NM_005559	284217		NM_005559	ENSG00000101680	LAMA1	LAMA|PTBHS|S-LAM-alpha	laminin subunit alpha 1	protein-coding
39416-2	chr1	43531603	43535252	+	22	NA	intron (NM_001329139, intron 1 of 32)	intron (NM_001329139, intron 1 of 32)	2544	NM_002840	5792		NM_002840	ENSG00000142949	PTPRF	BNAH2|LAR	protein tyrosine phosphatase receptor type F	protein-coding
16059	chr16	52547318	52549391	+	22	NA	promoter-TSS (NM_001146188)	promoter-TSS (NM_001146188)	-552	NM_001146188	27324		NM_001080430	ENSG00000103460	TOX3	CAGF9|TNRC9	TOX high mobility group box family member 3	protein-coding
7004	chr15_KI270905v1_alt	2208688	2209536	+	22	NA	intron (NM_001301025, intron 2 of 28).3	intron (NM_001301025, intron 2 of 28).3	45102	NM_001301025	7082		NM_003257	ENSG00000104067	TJP1	ZO-1	tight junction protein 1	protein-coding
14335	chr9	94995179	94996894	+	22	NA	intron (NM_001193329, intron 10 of 15)	intron (NM_001193329, intron 10 of 15)	-50482	NR_147614	101928119		NR_147613		LOC101928119	-	uncharacterized LOC101928119	ncRNA
14801	chr6	38639093	38639860	+	22	NA	intron (NM_052893, intron 1 of 11)	CpG	453	NM_001099272	114781		NM_052893	ENSG00000183826	BTBD9	dJ322I12.1	BTB domain containing 9	protein-coding
14164	chr1	179702488	179704543	+	22	NA	Intergenic	LTR51|LTR|ERV1	-24261	NM_001329713	148753		NM_173509	ENSG00000143340	FAM163A	C1orf76|NDSP	family with sequence similarity 163 member A	protein-coding
8371-2	chr2	162574536	162575491	+	22	NA	intron (NM_173162, intron 2 of 7)	intron (NM_173162, intron 2 of 7)	-193923	NR_110258	101929570		NR_110258	ENSG00000237750	KCNH7-AS1	-	KCNH7 antisense RNA 1	ncRNA
9263	chr4	153038630	153039333	+	22	NA	Intergenic	Intergenic	95998	NM_033393	85462		NM_033393	ENSG00000137460	FHDC1	INF1	FH2 domain containing 1	protein-coding
13759	chr8	6863611	6865047	+	22	NA	Intergenic	LTR24B|LTR|ERV1	13607	NM_005218	1672		NM_005218	ENSG00000164825	DEFB1	BD1|DEFB-1|DEFB101|HBD1	defensin beta 1	protein-coding
6049-2	chr14	76958995	76959732	+	22	NA	promoter-TSS (NR_133913)	promoter-TSS (NR_133913)	-275	NR_133913	105370578		NR_133913	ENSG00000258602	LINC01629	linc-KIAA1737-2	long intergenic non-protein coding RNA 1629	ncRNA
7640	chr1	214506887	214508061	+	22	NA	intron (NM_005401, intron 1 of 18)	intron (NM_005401, intron 1 of 18)	44128	NM_005401	5784		NM_005401	ENSG00000152104	PTPN14	CATLPH|PEZ|PTP36|PTPD2	protein tyrosine phosphatase non-receptor type 14	protein-coding
10931	chr4	153707696	153709938	+	22	NA	Intergenic	MER61F|LTR|ERV1	24537	NM_003264	7097		NM_003264	ENSG00000137462	TLR2	CD282|TIL4	toll like receptor 2	protein-coding
18369	chr19	44855523	44858300	+	22	NA	intron (NM_002856, intron 1 of 5)	intron (NM_002856, intron 1 of 5)	10614	NM_001042724	5819		NM_002856	ENSG00000130202	NECTIN2	CD112|HVEB|PRR2|PVRL2|PVRR2	nectin cell adhesion molecule 2	protein-coding
13436	chr16	89559910	89561610	+	22	NA	promoter-TSS (NR_002450)	promoter-TSS (NR_002450)	49	NM_033251	6137		NM_000977	ENSG00000167526	RPL13	BBC1|D16S444E|D16S44E|L13|SEMDIST|eL13	ribosomal protein L13	protein-coding
32468-2	chr5	116536213	116537455	+	22	NA	intron (NM_001300780, intron 1 of 19)	intron (NM_001300780, intron 1 of 19)	-37584	NR_147170	105379132		NR_147170	ENSG00000249167	SEMA6A-AS2	-	SEMA6A antisense RNA 2	ncRNA
14073	chr11	96246118	96247687	+	22	NA	intron (NM_032427, intron 1 of 4)	intron (NM_032427, intron 1 of 4)	-94536	NR_036125	100422991		NR_036125	ENSG00000266192	MIR1260B	mir-1260b	microRNA 1260b	ncRNA
6167	chr9	71760358	71761523	+	22	NA	intron (NM_001135820, intron 1 of 22)	intron (NM_001135820, intron 1 of 22)	7573	NM_001135820	23670		NM_013390	ENSG00000135048	CEMIP2	TMEM2	cell migration inducing hyaluronidase 2	protein-coding
9772-2	chr4	145938530	145939644	+	22	NA	promoter-TSS (NM_001306215)	promoter-TSS (NM_001306215)	-264	NM_178835	152485		NM_178835	ENSG00000151612	ZNF827	-	zinc finger protein 827	protein-coding
24662	chr9	129488668	129489927	+	22	NA	non-coding (NR_038955, exon 1 of 5)	non-coding (NR_038955, exon 1 of 5)	637	NR_038955	100506190		NR_038955		LINC00963	MetaLnc9	long intergenic non-protein coding RNA 963	ncRNA
12089	chr15	64461226	64462283	+	22	NA	intron (NM_015042, intron 1 of 9)	intron (NM_015042, intron 1 of 9)	1176	NM_015042	23060		NM_015042	ENSG00000180357	ZNF609	-	zinc finger protein 609	protein-coding
14583	chrY	26669154	26671377	+	22	NA	Intergenic	(ATGGA)n|Simple_repeat|Simple_repeat	941775	NR_002176	474148		NR_002176	ENSG00000280961	TTTY3B	LNCRNA00122|NCRNA00122	testis expressed transcript, Y-linked 3B	ncRNA
13915	chr17	73272381	73273385	+	22	NA	Intergenic	MamSINE1|SINE|tRNA-RTE	-11003	NM_001129885	642843		NM_001129885	ENSG00000187959	CPSF4L	-	cleavage and polyadenylation specific factor 4 like	protein-coding
7667	chr3	197820606	197821309	+	22	NA	intron (NM_001365715, intron 4 of 20)	intron (NM_001365715, intron 4 of 20)	29703	NM_001365716	84859		NM_032773	ENSG00000186001	LRCH3	-	leucine rich repeats and calponin homology domain containing 3	protein-coding
10836-2	chr3	48846890	48848165	+	22	NA	promoter-TSS (NR_109996)	promoter-TSS (NR_109996)	347	NM_001321989	5576		NM_004157	ENSG00000114302	PRKAR2A	PKR2|PRKAR2	protein kinase cAMP-dependent type II regulatory subunit alpha	protein-coding
14060-2	chr6	168260727	168262562	+	22	NA	intron (NR_110870, intron 4 of 4)	intron (NR_110870, intron 4 of 4)	18706	NR_110870	101929420		NR_110870	ENSG00000234647	LOC101929420	-	uncharacterized LOC101929420	ncRNA
11618	chr9	40583487	40584298	+	22	NA	Intergenic	Intergenic	83911	NR_136300	102724580		NR_136300		LOC102724580	-	methylenetetrahydrofolate dehydrogenase (NADP+ dependent) 1 like pseudogene	pseudo
11403-2	chr2	204544975	204546180	+	22	NA	5' UTR (NM_057177, exon 1 of 22)	5' UTR (NM_057177, exon 1 of 22)	102	NM_001302769	117583		NM_057177	ENSG00000116117	PARD3B	ALS2CR19|PAR3B|PAR3L|PAR3beta	par-3 family cell polarity regulator beta	protein-coding
13416	chr20	47347640	47349206	+	22	NA	intron (NM_001281781, intron 1 of 20)	intron (NM_001281781, intron 1 of 20)	3326	NM_001363741	23613		NM_012408	ENSG00000101040	ZMYND8	PRKCBP1|PRO2893|RACK7	zinc finger MYND-type containing 8	protein-coding
29995	chr17	50540306	50543881	+	22	NA	exon (NM_017957, exon 10 of 10)	exon (NM_017957, exon 10 of 10)	-3339	NR_135675	105371824		NR_135675	ENSG00000250286	LOC105371824	-	uncharacterized LOC105371824	ncRNA
13159	chrX	135520018	135521756	+	22	NA	promoter-TSS (NR_046740)	promoter-TSS (NR_046740)	-213	NR_046740	100874118		NR_046740	ENSG00000225235	INTS6L-AS1	DDX26B-AS1	INTS6L antisense RNA 1	ncRNA
13508-3	chr8	87673060	87674913	+	22	NA	Intergenic	LTR80B|LTR|ERVL	200029	NM_152418	138009		NM_152418	ENSG00000176566	DCAF4L2	WDR21C	DDB1 and CUL4 associated factor 4 like 2	protein-coding
6866	chr2	210476298	210477044	+	22	NA	promoter-TSS (NM_006055)	promoter-TSS (NM_006055)	34	NM_001136574	10314		NM_006055	ENSG00000115365	LANCL1	GPR69A|p40	LanC like glutathione S-transferase 1	protein-coding
17064	chr17	50054892	50057240	+	22	NA	promoter-TSS (NR_038230)	promoter-TSS (NR_038230)	-44	NM_002204	3675		NM_002204	ENSG00000005884	ITGA3	CD49C|FRP-2|GAP-B3|GAPB3|ILNEB|JEB7|MSK18|VCA-2|VL3A|VLA3a	integrin subunit alpha 3	protein-coding
19151	chr9	21499080	21501327	+	22	NA	intron (NR_152877, intron 1 of 3)	intron (NR_152877, intron 1 of 3)	11982	NR_029505	407035		NR_029505	ENSG00000199177	MIR31	MIRN31|hsa-mir-31|miR-31	microRNA 31	ncRNA
19050	chr1	39172375	39175145	+	22	NA	intron (NM_012090, intron 1 of 92)	intron (NM_012090, intron 1 of 92)	89593	NM_012090	23499		NM_012090	ENSG00000127603	MACF1	ABP620|ACF7|KIAA0754|LIS9|Lnc-PMIF|MACF|OFC4	microtubule actin crosslinking factor 1	protein-coding
18516	chr4	89488871	89490406	+	22	NA	Intergenic	MER61B|LTR|ERV1	-181838	NM_198281	285513		NM_198281	ENSG00000185477	GPRIN3	GRIN3	GPRIN family member 3	protein-coding
15913	chr9	76591532	76593869	+	22	NA	Intergenic	Intergenic	92067	NM_001097636	2650		NM_001490	ENSG00000187210	GCNT1	C2GNT|C2GNT-L|C2GNT1|C2GlcNAcT|G6NT|NACGT2|NAGCT2	glucosaminyl (N-acetyl) transferase 1	protein-coding
8861	chr19	7874410	7875163	+	22	NA	promoter-TSS (NM_001190467)	promoter-TSS (NM_001190467)	-396	NM_001190467	80164		NM_025094	ENSG00000183248	PRR36	-	proline rich 36	protein-coding
8782	chr2	111962748	111963822	+	22	NA	intron (NM_006343, intron 4 of 18)	LTR5_Hs|LTR|ERVK	64678	NM_006343	10461		NM_006343	ENSG00000153208	MERTK	MER|RP38|Tyro12|c-Eyk|c-mer	MER proto-oncogene, tyrosine kinase	protein-coding
30894	chr19	46713831	46715153	+	22	NA	promoter-TSS (NM_001079882)	promoter-TSS (NM_001079882)	-172	NM_001079882	25865		NM_016457	ENSG00000105287	PRKD2	HSPC187|PKD2|nPKC-D2	protein kinase D2	protein-coding
9238	chr9	97259962	97260782	+	22	NA	intron (NR_036529, intron 4 of 44)	intron (NR_036529, intron 4 of 44)	-21630	NR_136286	101926917		NR_136286		ANKRD18CP	-	ankyrin repeat domain 18C, pseudogene	pseudo
9731	chr1	230713995	230714981	+	22	NA	promoter-TSS (NM_001384479)	promoter-TSS (NM_001384479)	-366	NM_001384479	183		NM_000029	ENSG00000135744	AGT	ANHU|SERPINA8|hFLT1	angiotensinogen	protein-coding
8117	chr15	58854103	58855081	+	22	NA	exon (NM_001040453, exon 9 of 9)	exon (NM_001040453, exon 9 of 9)	79087	NM_024755	79811		NM_017968	ENSG00000137776	SLTM	Met	SAFB like transcription modulator	protein-coding
9207	chr1	91764369	91765607	+	22	NA	intron (NR_036634, intron 4 of 17)	MER30|DNA|hAT-Charlie	121163	NR_036634	7049		NM_003243	ENSG00000069702	TGFBR3	BGCAN|betaglycan	transforming growth factor beta receptor 3	protein-coding
8313	chr2	9251266	9252552	+	22	NA	intron (NM_001135191, intron 1 of 26)	intron (NM_001135191, intron 1 of 26)	45097	NM_003887	8853		NM_003887	ENSG00000151693	ASAP2	AMAP2|CENTB3|DDEF2|PAG3|PAP|Pap-alpha|SHAG1	ArfGAP with SH3 domain, ankyrin repeat and PH domain 2	protein-coding
10720-2	chr18	21741592	21742525	+	22	NA	intron (NM_020774, intron 1 of 20)	intron (NM_020774, intron 1 of 20)	1266	NM_020774	57534		NM_020774	ENSG00000101752	MIB1	DIP-1|DIP1|LVNC7|MIB|ZZANK2|ZZZ6	MIB E3 ubiquitin protein ligase 1	protein-coding
11189	chrX	71118085	71119737	+	22	NA	intron (NM_005120, intron 1 of 44)	CpG	315	NM_005120	9968		NM_005120	ENSG00000184634	MED12	ARC240|CAGH45|FGS1|HDKR|HOPA|Kto|MED12S|OHDOX|OKS|OPA1|TNRC11|TRAP230	mediator complex subunit 12	protein-coding
12332	chr10	96863029	96865096	+	22	NA	intron (NM_032440, intron 2 of 7)	intron (NM_032440, intron 2 of 7)	31117	NM_032440	84458		NM_015652	ENSG00000196233	LCOR	C10orf12|MLR2	ligand dependent nuclear receptor corepressor	protein-coding
10367	chr12	104457102	104458645	+	22	NA	intron (NM_018413, intron 1 of 2)	CpG	925	NM_001173982	50515		NM_018413	ENSG00000171310	CHST11	C4ST|C4ST-1|C4ST1|HSA269537|OCBMD	carbohydrate sulfotransferase 11	protein-coding
9221-2	chr9	137240337	137241216	+	22	NA	promoter-TSS (NM_006088)	promoter-TSS (NM_006088)	-511	NM_006088	10383		NM_006088	ENSG00000188229	TUBB4B	Beta2|LCAEOD|TUBB2|TUBB2C	tubulin beta 4B class IVb	protein-coding
13027	chrX	111680744	111682374	+	22	NA	promoter-TSS (NM_001257239)	promoter-TSS (NM_001257239)	-98	NM_001324294	79868		NM_018466	ENSG00000101901	ALG13	CDG1S|CXorf45|DEE36|EIEE36|GLT28D1|MDS031|TDRD13|YGL047W	ALG13 UDP-N-acetylglucosaminyltransferase subunit	protein-coding
10986	chr10	72449539	72450605	+	22	NA	intron (NM_006077, intron 8 of 11)	L2c|LINE|L2	73914	NM_001195519	10367		NM_006077	ENSG00000107745	MICU1	CALC|CBARA1|EFHA3|MPXPS|ara CALC	mitochondrial calcium uptake 1	protein-coding
7531	chr17	49362310	49363039	+	22	NA	promoter-TSS (NR_135579)	promoter-TSS (NR_135579)	-201	NM_014897	22834		NM_014897	ENSG00000198740	ZNF652	-	zinc finger protein 652	protein-coding
20555	chr5	124737721	124740696	+	22	NA	intron (NM_001385621, intron 1 of 8)	intron (NM_001385621, intron 1 of 8)	7431	NM_001385620	57507		NM_020747	ENSG00000168916	ZNF608	NY-REN-36	zinc finger protein 608	protein-coding
11355	chr17	18362801	18364065	+	22	NA	5' UTR (NM_001281786, exon 1 of 11)	5' UTR (NM_001281786, exon 1 of 11)	117	NM_004169	6470		NM_004169	ENSG00000176974	SHMT1	CSHMT|SHMT	serine hydroxymethyltransferase 1	protein-coding
13148	chr7	75442269	75443338	+	22	NA	intron (NM_001099415, intron 3 of 14)	CpG	32481	NR_033322	155400		NM_001039575	ENSG00000291151	NSUN5P1	NSUN5B|WBSCR20B	NSUN5 pseudogene 1	pseudo
18296	chr1	24021201	24023057	+	22	NA	Intergenic	Intergenic	-41802	NM_001191009	10772		NM_006625	ENSG00000188529	SRSF10	FUSIP1|FUSIP2|NSSR|PPP1R149|SFRS13|SFRS13A|SRp38|SRrp40|TASR|TASR1|TASR2	serine and arginine rich splicing factor 10	protein-coding
10318-2	chr14	21023740	21025104	+	22	NA	5' UTR (NM_001320329, exon 1 of 16)	5' UTR (NM_001320329, exon 1 of 16)	367	NM_001354568	57447		NM_016250	ENSG00000165795	NDRG2	SYLD	NDRG family member 2	protein-coding
13809	chr20	59317582	59319438	+	22	NA	intron (NM_207034, intron 2 of 4)	MER115|DNA|hAT-Tip100	17899	NM_001302455	1908		NM_000114	ENSG00000124205	EDN3	ET-3|ET3|HSCR4|PPET3|WS4B	endothelin 3	protein-coding
15768	chr5	141617870	141619527	+	22	NA	intron (NM_005219, intron 1 of 27)	CpG	302	NM_001314007	1729		NM_005219	ENSG00000131504	DIAPH1	DFNA1|DIA1|DRF1|LFHL1|SCBMS|hDIA1|mDia1	diaphanous related formin 1	protein-coding
13402	chr15	53454477	53456188	+	22	NA	Intergenic	Intergenic	85520	NR_102336	256764		NM_182758	ENSG00000166415	WDR72	AI2A3	WD repeat domain 72	protein-coding
10470	chr11	111693036	111694397	+	22	NA	intron (NM_015191, intron 4 of 14)	MIRb|SINE|MIR	72673	NM_001177563	5519		NM_002716	ENSG00000137713	PPP2R1B	PP2A-Abeta|PR65B	protein phosphatase 2 scaffold subunit Abeta	protein-coding
11639	chr13	98575206	98576788	+	22	NA	intron (NM_001286649, intron 1 of 9)	intron (NM_001286649, intron 1 of 9)	1110	NM_001032296	8428		NM_003576	ENSG00000102572	STK24	HEL-S-95|MST3|MST3B|STE20|STK3	serine/threonine kinase 24	protein-coding
7542	chr10	47557809	47558658	+	22	NA	Intergenic	Intergenic	-4710	NR_024495	642826		NR_024495		BMS1P2	BMS1LP2|BMS1LP6|BMS1P6|bA144G6.1	BMS1 pseudogene 2	pseudo
32468	chr5	116531205	116534750	+	22	NA	intron (NM_001300780, intron 1 of 19)	intron (NM_001300780, intron 1 of 19)	-41441	NR_147170	105379132		NR_147170	ENSG00000249167	SEMA6A-AS2	-	SEMA6A antisense RNA 2	ncRNA
9236	chr6	6810818	6812240	+	22	NA	Intergenic	Intergenic	-188703	NR_026970	285780		NM_173675	ENSG00000216863	LY86-AS1	LY86-AS|LY86AS	LY86 antisense RNA 1	ncRNA
12589	chr6	106823541	106824822	+	22	NA	Intergenic	Intergenic	-36640	NR_033557	100422737		NR_015365	ENSG00000235142	LINC02532	-	long intergenic non-protein coding RNA 2532	ncRNA
17022	chr10	45726608	45728021	+	22	NA	promoter-TSS (NM_001367413)	promoter-TSS (NM_001367413)	48	NM_001367407	253725		NM_015262	ENSG00000172661	WASHC2C	FAM21A|FAM21C|VPEF	WASH complex subunit 2C	protein-coding
16039	chr3	179323265	179323819	+	22	NA	promoter-TSS (NM_001375807)	promoter-TSS (NM_001375807)	89	NM_001375805	51193		NM_016331	ENSG00000121864	ZNF639	ANC-2H01|ANC_2H01|ZASC1	zinc finger protein 639	protein-coding
6424	chr15	68106530	68107310	+	22	NA	intron (NM_001320687, intron 3 of 14)	MamRep137|DNA|TcMar-Tigger	52344	NM_001320687	8554		NM_016166	ENSG00000033800	PIAS1	DDXBP1|GBP|GU/RH-II|ZMIZ3	protein inhibitor of activated STAT 1	protein-coding
8110-2	chr4	140635349	140636350	+	22	NA	intron (NM_015130, intron 15 of 20)	intron (NM_015130, intron 15 of 20)	7231	NR_077215	644962		NR_077215		TNRC18P1	-	trinucleotide repeat containing 18 pseudogene 1	pseudo
6991	chr15	55652135	55652874	+	22	NA	intron (NM_173814, intron 11 of 19)	intron (NM_173814, intron 11 of 19)	-63533	NM_015617	26108		NM_015617	ENSG00000171016	PYGO1	-	pygopus family PHD finger 1	protein-coding
6511-2	chr3	114152372	114153122	+	22	NA	intron (NM_033663, intron 3 of 7)	intron (NM_033663, intron 3 of 7)	26029	NM_001290809	1814		NM_000796	ENSG00000151577	DRD3	D3DR|ETM1|FET1	dopamine receptor D3	protein-coding
12674	chr19	8591709	8593199	+	22	NA	promoter-TSS (NM_001282352)	promoter-TSS (NM_001282352)	-258	NM_001282352	81794		NM_030957	ENSG00000142303	ADAMTS10	ADAM-TS10|ADAMTS-10|WMS|WMS1	ADAM metallopeptidase with thrombospondin type 1 motif 10	protein-coding
21407	chr3	196867282	196868867	+	22	NA	intron (NM_001308045, intron 1 of 8)	CpG	154	NM_152699	205564		NM_152699	ENSG00000119231	SENP5	-	SUMO specific peptidase 5	protein-coding
6487	chr1	160536682	160537188	+	22	NA	Intergenic	LTR33A_|LTR|ERVL	-13680	NM_001184715	114836		NM_052931	ENSG00000162739	SLAMF6	CD352|KALI|KALIb|Ly108|NTB-A|NTBA|SF2000	SLAM family member 6	protein-coding
9009	chr19	23276948	23278432	+	22	NA	Intergenic	LTR6A|LTR|ERV1	-3439	NR_103741	100132815		NR_103741		IPO5P1	-	importin 5 pseudogene 1	pseudo
6025	chr14	31991279	31991931	+	22	NA	Intergenic	Intergenic	46752	NR_146544	105370439		NR_146544	ENSG00000258474	LINC02313	-	long intergenic non-protein coding RNA 2313	ncRNA
7711	chr21	40577333	40578299	+	22	NA	intron (NM_001271534, intron 3 of 32)	LTR6B|LTR|ERV1	52951	NR_046774	100874326		NR_046774	ENSG00000233756	DSCAM-IT1	zag4	DSCAM intronic transcript 1	ncRNA
8008	chr1	182869115	182869835	+	22	NA	intron (NM_001357, intron 14 of 27)	intron (NM_001357, intron 14 of 27)	-29884	NR_148933	647070		NR_148933		DHX9-AS1	-	DHX9 antisense RNA 1	ncRNA
12121	chr2	9207068	9208447	+	22	NA	intron (NM_001135191, intron 1 of 26)	CpG	945	NM_003887	8853		NM_003887	ENSG00000151693	ASAP2	AMAP2|CENTB3|DDEF2|PAG3|PAP|Pap-alpha|SHAG1	ArfGAP with SH3 domain, ankyrin repeat and PH domain 2	protein-coding
14451	chrY	11310157	11311314	+	22	NA	Intergenic	BSR/Beta|Satellite|Satellite	1110855	NR_033667	352887		NR_033667	ENSG00000291034	GYG2P1	GYG2P	glycogenin 2 pseudogene 1	pseudo
39416	chr1	43535686	43537298	+	22	NA	intron (NM_001329139, intron 1 of 32)	intron (NM_001329139, intron 1 of 32)	5609	NM_002840	5792		NM_002840	ENSG00000142949	PTPRF	BNAH2|LAR	protein tyrosine phosphatase receptor type F	protein-coding
8435	chr4	38160472	38161412	+	22	NA	Intergenic	MLT1I|LTR|ERVL-MaLR	40988	NM_001253915	23216		NM_015173	ENSG00000065882	TBC1D1	TBC|TBC1	TBC1 domain family member 1	protein-coding
9315	chr11	96193631	96195698	+	22	NA	intron (NM_032427, intron 1 of 4)	intron (NM_032427, intron 1 of 4)	-146774	NR_036125	100422991		NR_036125	ENSG00000266192	MIR1260B	mir-1260b	microRNA 1260b	ncRNA
8136	chr11	27455545	27456823	+	22	NA	intron (NM_018490, intron 1 of 17)	intron (NM_018490, intron 1 of 17)	-15547	NR_131169	105376671		NR_131169	ENSG00000254862	LGR4-AS1	lnc-BBOX1-1	LGR4 antisense RNA 1	ncRNA
9563	chr2	101741790	101742860	+	22	NA	intron (NM_001384572, intron 1 of 29)	intron (NM_001384572, intron 1 of 29)	44060	NM_001384556	9448		NM_004834	ENSG00000071054	MAP4K4	FLH21957|HEL-S-31|HGK|MEKKK4|NIK	mitogen-activated protein kinase kinase kinase kinase 4	protein-coding
13643	chr11	7612261	7613894	+	22	NA	intron (NM_001351856, intron 6 of 23)	intron (NM_001351856, intron 6 of 23)	7343	NM_001256569	8495		NM_003621	ENSG00000166387	PPFIBP2	Cclp1	PPFIA binding protein 2	protein-coding
8540	chr8	127299982	127301615	+	22	NA	intron (NR_117100, intron 5 of 5)	intron (NR_117100, intron 5 of 5)	56161	NR_117099	103021164		NR_117099		CASC21	CARLO2|CARLo-2|LINC01244	cancer susceptibility 21	ncRNA
9439	chr13	24053267	24054091	+	22	NA	intron (NM_001286792, intron 3 of 14)	intron (NM_001286792, intron 3 of 14)	73877	NM_001286792	221178		NM_153023	ENSG00000182957	SPATA13	ARHGEF29|ASEF2	spermatogenesis associated 13	protein-coding
15642-2	chr7	99431504	99433711	+	22	NA	intron (NM_015545, intron 3 of 7)	LTR5B|LTR|ERVK	6191	NM_015545	26024		NM_015545	ENSG00000106246	PTCD1	-	pentatricopeptide repeat domain 1	protein-coding
9913	chr6	163413172	163414278	+	22	NA	promoter-TSS (NM_006775)	promoter-TSS (NM_006775)	225	NR_037593	100526820		NR_037593	ENSG00000270419	CAHM	LINC00468	colon adenocarcinoma hypermethylated	ncRNA
13486	chr10	119251462	119252854	+	22	NA	intron (NM_005308, intron 1 of 15)	intron (NM_005308, intron 1 of 15)	44587	NM_005308	2869		NM_005308	ENSG00000198873	GRK5	FP2025|GPRK5	G protein-coupled receptor kinase 5	protein-coding
15761	chr4	53885294	53886658	+	22	NA	Intergenic	Intergenic	101306	NR_027153	402176		NM_001011538		RPL21P44	RPL21_17_477	ribosomal protein L21 pseudogene 44	pseudo
18605	chr12	132513921	132515421	+	22	NA	intron (NM_001382740, intron 2 of 11)	intron (NM_001382740, intron 2 of 11)	9265	NM_001382742	57666		NM_001142641	ENSG00000112787	FBRSL1	-	fibrosin like 1	protein-coding
9935	chr16	5071750	5072233	+	22	NA	promoter-TSS (NM_001330504)	promoter-TSS (NM_001330504)	148	NM_019109	56052		NM_019109	ENSG00000033011	ALG1	CDG1K|HMAT1|HMT-1|HMT1|MT-1|Mat-1|hMat-1	ALG1 chitobiosyldiphosphodolichol beta-mannosyltransferase	protein-coding
16331	chr3	126750068	126751456	+	22	NA	intron (NM_032343, intron 4 of 7)	intron (NM_032343, intron 4 of 7)	46522	NM_032343	84303		NM_032343	ENSG00000159685	CHCHD6	CHCM1|MICOS25|Mic25|PPP1R23	coiled-coil-helix-coiled-coil-helix domain containing 6	protein-coding
9844	chr10	29658685	29659644	+	22	NA	intron (NM_003174, intron 2 of 35)	intron (NM_003174, intron 2 of 35)	-24193	NM_021738	6840		NM_003174	ENSG00000197321	SVIL	MFM10	supervillin	protein-coding
9133	chr8	89901752	89902625	+	22	NA	promoter-TSS (NM_001126111)	promoter-TSS (NM_001126111)	320	NM_004337	734		NM_004337	ENSG00000164823	OSGIN2	C8orf1|hT41	oxidative stress induced growth inhibitor family member 2	protein-coding
36560	chr9	113597891	113599289	+	22	NA	TTS (NM_001282922)	TTS (NM_001282922)	4461	NM_001276262	5998		NM_017790	ENSG00000138835	RGS3	C2PA|RGP3	regulator of G protein signaling 3	protein-coding
9763-2	chr5	149320517	149321420	+	22	NA	intron (NM_001146337, intron 14 of 17)	MamRep605|LTR?|LTR?	-24531	NM_152407	134266		NM_152407	ENSG00000164284	GRPEL2	Mt-GrpE#2	GrpE like 2, mitochondrial	protein-coding
10695	chr7	139829103	139830169	+	22	NA	intron (NM_030984, intron 1 of 11)	intron (NM_030984, intron 1 of 11)	372	NM_001061	6916		NM_001061	ENSG00000059377	TBXAS1	BDPLT14|CYP5|CYP5A1|GHOSAL|THAS|TS|TXAS|TXS	thromboxane A synthase 1	protein-coding
20146	chr16	89166868	89168073	+	22	NA	intron (NR_046200, intron 2 of 2)	intron (NR_046200, intron 2 of 2)	1087	NR_046200	400558		NR_046200	ENSG00000205015	LINC02138	-	long intergenic non-protein coding RNA 2138	ncRNA
10800	chr12	82015497	82016384	+	22	NA	Intergenic	Tigger3c|DNA|TcMar-Tigger	62221	NR_110089	101928449		NR_110089	ENSG00000257747	LINC02426	-	long intergenic non-protein coding RNA 2426	ncRNA
6190-2	chr7	157139165	157139173	+	22	NA	5' UTR (NM_014671, exon 1 of 23)	5' UTR (NM_014671, exon 1 of 23)	243	NM_014671	9690		NM_014671	ENSG00000009335	UBE3C	HECTH2|NDSMBA|NEDSMBA|RAUL	ubiquitin protein ligase E3C	protein-coding
8025	chr13	79647594	79648482	+	22	NA	Intergenic	Intergenic	81311	NR_125772	103724388		NR_125772	ENSG00000227676	LINC01068	-	long intergenic non-protein coding RNA 1068	ncRNA
9379	chr6	62285826	62286925	+	22	NA	promoter-TSS (NM_001350622)	promoter-TSS (NM_001350622)	-148	NM_001350622	202559		NM_152688	ENSG00000112232	KHDRBS2	KHDRBS2-OT|KHDRBS2-OT1|SLM-1|SLM1	KH RNA binding domain containing, signal transduction associated 2	protein-coding
6461-4	chr7	6577301	6577897	+	22	NA	5' UTR (NM_001134388, exon 2 of 9)	5' UTR (NM_001134388, exon 2 of 9)	145	NM_001134389	55146		NM_018106	ENSG00000136247	ZDHHC4	ZNF374	zinc finger DHHC-type palmitoyltransferase 4	protein-coding
8513	chr7	17130124	17131680	+	22	NA	Intergenic	Intergenic	-167750	NM_001621	196		NM_001621	ENSG00000106546	AHR	RP85|bHLHe76	aryl hydrocarbon receptor	protein-coding
11424	chr13	103282545	103283799	+	22	NA	Intergenic	Intergenic	-142028	NR_126374	104326190		NR_126374		LINC01309	TCONS_l2_00007459	long intergenic non-protein coding RNA 1309	ncRNA
8417	chr1	111591999	111593525	+	22	NA	intron (NM_001370216, intron 1 of 7)	intron (NM_001370216, intron 1 of 7)	15556	NR_034126	100129269		NR_034126		LINC01160	-	long intergenic non-protein coding RNA 1160	ncRNA
10081	chr19	3184877	3185880	+	22	NA	promoter-TSS (NM_001321463)	promoter-TSS (NM_001321463)	-552	NM_020170	56926		NM_020170	ENSG00000125912	NCLN	NET59	nicalin	protein-coding
6037	chr13	72960181	72960853	+	22	NA	intron (NM_006346, intron 14 of 17)	intron (NM_006346, intron 14 of 17)	-94459	NM_001286818	688		NM_001730	ENSG00000102554	KLF5	BTEB2|CKLF|IKLF	KLF transcription factor 5	protein-coding
12746	chr1	224432718	224434369	+	22	NA	intron (NM_001115113, intron 1 of 13)	intron (NM_001115113, intron 1 of 13)	-1097	NR_136289	149111		NM_152495	ENSG00000143786	CNIH3	CNIH-3	cornichon family AMPA receptor auxiliary protein 3	protein-coding
13950	chr1	205933263	205934682	+	21	NA	promoter-TSS (NR_110984)	promoter-TSS (NR_110984)	-941	NR_110984	103021296		NR_110983		SLC26A9-AS1	-	SLC26A9 and RAB7B antisense RNA 1	ncRNA
26251	chr16	14496719	14499367	+	21	NA	intron (NM_002582, intron 21 of 23)	AluSc5|SINE|Alu	-127777	NR_131191	105447648		NR_131191	ENSG00000260009	LINC02130	-	long intergenic non-protein coding RNA 2130	ncRNA
11732	chr11	121687642	121689062	+	21	NA	Intergenic	Intergenic	-206563	NR_169501	105369535		NR_169501		LOC105369535	-	uncharacterized LOC105369535	ncRNA
6392	chr9	126374351	126374984	+	21	NA	intron (NM_033446, intron 2 of 9)	intron (NM_033446, intron 2 of 9)	35837	NR_045006	641373		NR_045006		NRON	NCRNA00194	non-coding repressor of NFAT	ncRNA
11912	chr16	2603222	2604178	+	21	NA	TTS (NM_001261816)	TTS (NM_001261816)	316	NR_015441	652276		NR_015441	ENSG00000291228	LOC652276	-	potassium channel tetramerization domain containing 5 pseudogene	pseudo
7923	chr5	83576786	83577647	+	21	NA	intron (NM_001164097, intron 12 of 13)	LTR44|LTR|ERV1	-14902	NR_136215	105379054		NR_136215	ENSG00000249835	VCAN-AS1	-	VCAN antisense RNA 1	ncRNA
13849	chr12	96906974	96908439	+	21	NA	5' UTR (NM_001135177, exon 2 of 14)	5' UTR (NM_001135177, exon 2 of 14)	240	NM_001135175	121441		NM_152905	ENSG00000139350	NEDD1	GCP-WD|TUBGCP7	NEDD1 gamma-tubulin ring complex targeting factor	protein-coding
9430	chrX	131578430	131579406	+	21	NA	Intergenic	L1PA2|LINE|L1	34844	NM_001004486	347468		NM_001004486	ENSG00000171054	OR13H1	ORX1	olfactory receptor family 13 subfamily H member 1	protein-coding
12819	chr1	10210976	10212492	+	21	NA	5' UTR (NM_001365952, exon 1 of 49)	5' UTR (NM_001365952, exon 1 of 49)	118	NM_001365952	23095		NM_015074	ENSG00000054523	KIF1B	CMT2|CMT2A|CMT2A1|HMSNII|KLP|NBLST1	kinesin family member 1B	protein-coding
17178	chr1	6204782	6206434	+	21	NA	promoter-TSS (NM_207396)	promoter-TSS (NM_207396)	172	NR_125997	102724450		NR_125997	ENSG00000226944	RNF207-AS1	-	RNF207 antisense RNA 1	ncRNA
8190-3	chr6	116631270	116631964	+	21	NA	intron (NM_001010892, intron 5 of 5)	MER76|LTR|ERVL	15138	NM_001161664	345895		NM_001010892	ENSG00000111834	RSPH4A	CILD11|RSHL3|RSPH6B|dJ412I7.1	radial spoke head component 4A	protein-coding
15897	chr1	27503828	27505454	+	21	NA	Intergenic	Intergenic	-14474	NM_006990	10163		NM_006990	ENSG00000158195	WASF2	IMD2|SCAR2|WASF4|WAVE2|dJ393P12.2	WASP family member 2	protein-coding
27467	chr17	17716655	17718176	+	21	NA	intron (NM_030665, intron 1 of 5)	intron (NM_030665, intron 1 of 5)	35957	NM_030665	10743		NM_017574	ENSG00000108557	RAI1	SMCR|SMS	retinoic acid induced 1	protein-coding
10946	chr1	24705391	24706245	+	21	NA	Intergenic	MIRb|SINE|MIR	-39629	NM_013943	25932		NM_013943	ENSG00000169504	CLIC4	CLIC4L|H1|MTCLIC|huH1|p64H1	chloride intracellular channel 4	protein-coding
12891	chr21	33411943	33413991	+	21	NA	intron (NM_001329128, intron 2 of 7)	intron (NM_001329128, intron 2 of 7)	9554	NM_005534	3460		NM_005534	ENSG00000159128	IFNGR2	AF-1|IFGR2|IFNGT1|IMD28	interferon gamma receptor 2	protein-coding
12291	chr2	125710275	125711536	+	21	NA	Intergenic	LTR7C|LTR|ERV1	407080	NR_146970	105373600		NR_146970	ENSG00000226813	LINC01941	-	long intergenic non-protein coding RNA 1941	ncRNA
6254-2	chr2	186544073	186544718	+	21	NA	Intergenic	Intergenic	-45661	NM_002210	3685		NM_002210	ENSG00000138448	ITGAV	CD51|MSK8|VNRA|VTNR	integrin subunit alpha V	protein-coding
26148-2	chr4	71597590	71601883	+	21	NA	Intergenic	Intergenic	184343	NM_000583	2638		NM_000583	ENSG00000145321	GC	DBP|DBP-maf|DBP/GC|GRD3|Gc-MAF|GcMAF|HEL-S-51|VDB|VDBG|VDBP	GC vitamin D binding protein	protein-coding
12867	chr10	103715232	103716787	+	21	NA	intron (NM_014631, intron 5 of 13)	intron (NM_014631, intron 5 of 13)	-30770	NR_038940	100505839		NR_038940	ENSG00000280693	SH3PXD2A-AS1	-	SH3PXD2A antisense RNA 1	ncRNA
9015	chr17	27577274	27578126	+	21	NA	intron (NM_001367810, intron 3 of 18)	intron (NM_001367810, intron 3 of 18)	-53488	NR_024043	3965		NM_002308	ENSG00000168961	LGALS9	HUAT|LGALS9A	galectin 9	protein-coding
6507-2	chr18	22466211	22467213	+	21	NA	Intergenic	L2b|LINE|L2	-48797	NM_172241	64693		NM_022663	ENSG00000212710	CTAGE1	CT21.1|CT21.2|CTAGE|CTAGE-1|CTAGE-2	cutaneous T cell lymphoma-associated antigen 1	protein-coding
18037	chr12	32891494	32894218	+	21	NA	intron (NM_004572, intron 1 of 13)	intron (NM_004572, intron 1 of 13)	3921	NM_001005242	5318		NM_004572	ENSG00000057294	PKP2	ARVD9	plakophilin 2	protein-coding
9653	chr10	87864001	87864994	+	21	NA	promoter-TSS (NM_001126049)	promoter-TSS (NM_001126049)	872	NM_001304717	5728		NM_000314	ENSG00000171862	PTEN	10q23del|BZS|CWS1|DEC|GLM2|MHAM|MMAC1|PTEN1|PTENbeta|TEP1	phosphatase and tensin homolog	protein-coding
8771	chr9	33374874	33375779	+	21	NA	Intergenic	L2|LINE|L2	27242	NR_164778	364		NM_001170	ENSG00000165269	AQP7	AQP7L|AQPap|GLYCQTL	aquaporin 7	protein-coding
7481	chr3	44400471	44401381	+	21	NA	intron (NM_173826, intron 9 of 10)	MIRb|SINE|MIR	23107	NM_001351480
11837	chr3	4492245	4493716	+	21	NA	promoter-TSS (NM_001378452)	promoter-TSS (NM_001378452)	183	NR_108075	100996539		NR_108075	ENSG00000231249	ITPR1-DT	ITPR1-AS1	ITPR1 divergent transcript	ncRNA
6609	chr2	152481596	152482766	+	21	NA	intron (NM_052905, intron 1 of 25)	intron (NM_052905, intron 1 of 25)	147007	NM_052905	114793		NM_052905	ENSG00000157827	FMNL2	FHOD2	formin like 2	protein-coding
14222	chr1	83739925	83742217	+	21	NA	intron (NR_119375, intron 2 of 2)	intron (NR_119375, intron 2 of 2)	119475	NR_119374	101927560		NR_119374	ENSG00000233008	LOC101927560	-	uncharacterized LOC101927560	ncRNA
6328	chr12	26185162	26186105	+	21	NA	Intergenic	Intergenic	-9703	NM_001135823	8082		NM_005086	ENSG00000123096	SSPN	DAGA5|KRAG|NSPN|SPN1|SPN2	sarcospan	protein-coding
13430	chr11_KI270830v1_alt	164176	165832	+	21	NA	TTS (NR_026642).6	TTS (NR_026642).6	2862	NR_026642	100132464		NR_026642	ENSG00000205865	FAM99B	-	family with sequence similarity 99 member B	ncRNA
8334-3	chrY	19066118	19067175	+	21	NA	intron (NR_158641, intron 2 of 4)	intron (NR_158641, intron 2 of 4)	9357	NR_125736	83869		NM_031932	ENSG00000176728	TTTY14	CYorf14|NCRNA00137|NCRNA00185|PRO2834|TTY14	testis expressed transcript, Y-linked 14	ncRNA
12737	chr9	13978755	13980465	+	21	NA	Intergenic	Intergenic	51639	NR_038194	100113404		NR_038194	ENSG00000205636	LINC00583	C9orf146	long intergenic non-protein coding RNA 583	ncRNA
9467-2	chr4	107989325	107990646	+	21	NA	promoter-TSS (NM_005327)	promoter-TSS (NM_005327)	96	NM_001184705	3033		NM_005327	ENSG00000138796	HADH	HAD|HADH1|HADHSC|HCDH|HHF4|MSCHAD|SCHAD	hydroxyacyl-CoA dehydrogenase	protein-coding
14084	chr17	44014094	44015603	+	21	NA	exon (NM_032376, exon 1 of 4)	exon (NM_032376, exon 1 of 4)	115	NM_032376	84336		NM_032376	ENSG00000091947	TMEM101	-	transmembrane protein 101	protein-coding
6689	chr2	156181564	156182661	+	21	NA	intron (NR_110250, intron 1 of 3)	intron (NR_110250, intron 1 of 3)	72819	NR_110250	101929378		NR_110249	ENSG00000226383	LINC01876	uc.83	long intergenic non-protein coding RNA 1876	ncRNA
14115	chr4	76274289	76276122	+	21	NA	intron (NM_001136570, intron 5 of 7)	intron (NM_001136570, intron 5 of 7)	23484	NM_001136570	100129583		NM_001136570	ENSG00000189157	FAM47E	-	family with sequence similarity 47 member E	protein-coding
25667-2	chr4	156969993	156972500	+	21	NA	non-coding (NR_036641, exon 1 of 7)	non-coding (NR_036641, exon 1 of 7)	553	NM_016205	56034		NM_016205	ENSG00000145431	PDGFC	FALLOTEIN|SCDGF	platelet derived growth factor C	protein-coding
14376	chr10	78656449	78657538	+	21	NA	Intergenic	Intergenic	389651	NR_073447	414243		NR_073447	ENSG00000230417	LINC00595	C10orf101	long intergenic non-protein coding RNA 595	ncRNA
6869	chrX	123962800	123963445	+	21	NA	intron (NM_001282418, intron 2 of 33)	intron (NM_001282418, intron 2 of 33)	1416	NM_006603	10735		NM_006603	ENSG00000101972	STAG2	HPE13|MKMS|NEDXCF|SA-2|SA2|SCC3B|bA517O1.1	STAG2 cohesin complex component	protein-coding
21404	chr19	2049488	2050848	+	21	NA	intron (NM_199054, intron 2 of 13)	intron (NM_199054, intron 2 of 13)	1076	NM_199054	2872		NM_017572	ENSG00000099875	MKNK2	GPRK7|MNK2	MAPK interacting serine/threonine kinase 2	protein-coding
8596	chr5	64939364	64940541	+	21	NA	intron (NM_001297644, intron 11 of 12)	L1PA7|LINE|L1	171022	NM_001364478	10283		NM_005869	ENSG00000153015	CWC27	NY-CO-10|RPSKA|SDCCAG-10|SDCCAG10	CWC27 spliceosome associated cyclophilin	protein-coding
6641	chr10	14571612	14572705	+	21	NA	promoter-TSS (NM_001320737)	promoter-TSS (NM_001320737)	31	NM_001320737	83641		NM_031453	ENSG00000065809	FAM107B	C10orf45|HITS	family with sequence similarity 107 member B	protein-coding
7820	chr4	25376661	25377813	+	21	NA	promoter-TSS (NM_001286756)	promoter-TSS (NM_001286756)	-26	NM_001286756	29945		NM_013367	ENSG00000053900	ANAPC4	APC4	anaphase promoting complex subunit 4	protein-coding
9288	chr1	64745246	64746261	+	21	NA	intron (NM_001366165, intron 1 of 11)	intron (NM_001366165, intron 1 of 11)	678	NM_018211	55225		NM_018211	ENSG00000162437	RAVER2	-	ribonucleoprotein, PTB binding 2	protein-coding
9721	chr12	50259518	50260766	+	21	NA	intron (NM_001113546, intron 1 of 10)	intron (NM_001113546, intron 1 of 10)	23378	NM_016357	51474		NM_016357	ENSG00000050405	LIMA1	EPLIN|LDLCQ8|SREBP3	LIM domain and actin binding 1	protein-coding
11953-2	chr7	27112843	27113868	+	21	NA	intron (NM_153631, intron 4 of 5)	intron (NM_153631, intron 4 of 5)	487	NM_001384346	3200		NM_030661	ENSG00000105997	HOXA3	HOX1|HOX1E	homeobox A3	protein-coding
11471	chr20	34016688	34017907	+	21	NA	intron (NM_016732, intron 1 of 9)	MIR3|SINE|MIR	-22930	NR_109885	101926888		NR_109885	ENSG00000285230	RALY-AS1	-	RALY antisense RNA 1	ncRNA
18279	chr11	121460603	121462066	+	21	NA	intron (NM_003105, intron 1 of 47)	intron (NM_003105, intron 1 of 47)	9020	NM_003105	6653		NM_003105	ENSG00000137642	SORL1	C11orf32|LR11|LRP9|SORLA|SorLA-1|gp250	sortilin related receptor 1	protein-coding
17489-2	chr8	144358218	144359949	+	21	NA	promoter-TSS (NM_012162)	promoter-TSS (NM_012162)	470	NM_001363118	79581		NM_024531	ENSG00000185803	SLC52A2	BVVLS2|D15Ertd747e|GPCR41|GPR172A|HuPAR-1|PAR1|RFT3|RFVT2|hRFT3	solute carrier family 52 member 2	protein-coding
7890	chr11	12746291	12747246	+	21	NA	intron (NM_021961, intron 2 of 12)	intron (NM_021961, intron 2 of 12)	72347	NM_021961	7003		NM_021961	ENSG00000187079	TEAD1	AA|NTEF-1|REF1|TCF-13|TCF13|TEAD-1|TEF-1	TEA domain transcription factor 1	protein-coding
16223	chr20	23980983	23983273	+	21	NA	Intergenic	Intergenic	4747	NM_178312	92086		NM_080920	ENSG00000149435	GGTLC1	GGTL6|GGTLA3|GGTLA4|dJ831C21.1|dJ831C21.2	gamma-glutamyltransferase light chain 1	protein-coding
9902	chr12	6363375	6364106	+	21	NA	intron (NM_001159575, intron 2 of 12)	CpG-5265	-11420	NM_001270987	4055		NM_002342	ENSG00000111321	LTBR	D12S370|LT-BETA-R|TNF-R-III|TNFCR|TNFR-RP|TNFR2-RP|TNFR3|TNFRSF3	lymphotoxin beta receptor	protein-coding
8624	chr10	65675214	65675961	+	21	NA	intron (NR_120647, intron 3 of 5)	LTR22E|LTR|ERVK	104162	NR_120647	101928913		NR_120647		LINC01515	-	long intergenic non-protein coding RNA 1515	ncRNA
13154	chr15	65414442	65415985	+	21	NA	intron (NM_020962, intron 1 of 19)	intron (NM_020962, intron 1 of 19)	7734	NM_020962	57722		NM_020962	ENSG00000103742	IGDCC4	DDM36|NOPE	immunoglobulin superfamily DCC subclass member 4	protein-coding
9985	chr3	115783873	115785299	+	21	NA	Intergenic	CpG	120540	NR_145779	109623450		NR_145779		SNORD155	-	small nucleolar RNA, C/D box 155	snoRNA
12883	chr3	15605796	15607312	+	21	NA	intron (NM_001281725, intron 1 of 3)	intron (NM_001281725, intron 1 of 3)	4585	NM_001281725	686		NM_001281723	ENSG00000169814	BTD	-	biotinidase	protein-coding
10793	chr1	247077969	247079050	+	21	NA	intron (NM_001204220, intron 1 of 3)	CpG	302	NM_033213	93474		NM_033213	ENSG00000277462	ZNF670	-	zinc finger protein 670	protein-coding
20653	chr12	100162441	100166336	+	21	NA	TTS (NR_024261)	TTS (NR_024261)	8955	NR_036632	55592		NM_017600	ENSG00000290571	GOLGA2P5	GOLGA2B|GOLGA2L1	GOLGA2 pseudogene 5	pseudo
6782-2	chr3	76698001	76698705	+	21	NA	intron (NM_001378194, intron 1 of 27)	intron (NM_001378194, intron 1 of 27)	-341746	NM_001378193	6092		NM_002942	ENSG00000185008	ROBO2	SAX3	roundabout guidance receptor 2	protein-coding
13659	chr19	18434917	18435383	+	21	NA	TTS (NM_001009998)	TTS (NM_001009998)	2159	NM_001253389	51477		NM_016368	ENSG00000105655	ISYNA1	INO1|INOS|IPS|IPS 1|IPS-1	inositol-3-phosphate synthase 1	protein-coding
11118	chr18	21990810	21991634	+	21	NA	Intergenic	Intergenic	-159816	NR_110369	102723167		NR_110369	ENSG00000265142	MIR133A1HG	MIR1-2HG	MIR133A1 host gene	ncRNA
10704	chr1	15975370	15976533	+	21	NA	intron (NM_001324138, intron 1 of 14)	CpG	150	NM_003443	7709		NM_003443	ENSG00000116809	ZBTB17	MIZ-1|ZNF151|ZNF60|pHZ-67	zinc finger and BTB domain containing 17	protein-coding
12141	chr3	184658519	184659581	+	21	NA	Intergenic	Intergenic	53014	NM_022149	64110		NM_022149	ENSG00000177383	MAGEF1	MAGE-F1	MAGE family member F1	protein-coding
11712-2	chr5	39447947	39450060	+	21	NA	Intergenic	MLT2B3|LTR|ERVL	-23770	NM_001244871	1601		NM_001343	ENSG00000153071	DAB2	DOC-2|DOC2	DAB adaptor protein 2	protein-coding
11410-2	chr7	29332344	29333810	+	21	NA	intron (NM_001293070, intron 2 of 13)	intron (NM_001293070, intron 2 of 13)	-124107	NR_120522	102724484		NR_120522		CHN2-AS1	-	CHN2 antisense RNA 1	ncRNA
8420	chr19	37077831	37078714	+	21	NA	promoter-TSS (NM_001329522)	promoter-TSS (NM_001329522)	50	NM_001329519	147923		NM_144689	ENSG00000197050	ZNF420	APAK	zinc finger protein 420	protein-coding
10366	chr18	54947719	54949136	+	21	NA	intron (NM_025214, intron 1 of 11)	MLT1C|LTR|ERVL-MaLR	9621	NM_001143829	80323		NM_025214	ENSG00000166510	CCDC68	SE57-1	coiled-coil domain containing 68	protein-coding
9756-2	chr12	32135546	32137010	+	21	NA	intron (NR_148725, intron 1 of 9)	intron (NR_148725, intron 1 of 9)	29431	NM_001354189	636		NM_001714	ENSG00000151746	BICD1	BICD|bic-D 1	BICD cargo adaptor 1	protein-coding
9992	chr5	5139375	5140760	+	21	NA	promoter-TSS (NR_109915)	promoter-TSS (NR_109915)	-13	NR_109915	101929176		NR_109915	ENSG00000250579	ADAMTS16-DT	CTD-2297D10.2	ADAMTS16 divergent transcript	ncRNA
10294	chr1	182101289	182102771	+	21	NA	Intergenic	GA-rich|Low_complexity|Low_complexity	-40318	NM_001009992	127665		NM_001009992	ENSG00000179930	ZNF648	-	zinc finger protein 648	protein-coding
11261	chr7	137753130	137755007	+	21	NA	intron (NM_001321708, intron 1 of 32)	intron (NM_001321708, intron 1 of 32)	92264	NM_001321709	9162		NM_004717	ENSG00000157680	DGKI	DGK-IOTA	diacylglycerol kinase iota	protein-coding
11648	chr1	221708818	221710446	+	21	NA	intron (NR_111940, intron 1 of 2)	intron (NR_111940, intron 1 of 2)	27268	NR_111939	11221		NM_007207	ENSG00000143507	DUSP10	MKP-5|MKP5	dual specificity phosphatase 10	protein-coding
12797	chr7_KI270809v1_alt	35438	36887	+	21	NA	promoter-TSS (NR_029411).2	promoter-TSS (NR_029411).2	-13	NR_029411	100133091		NR_029411	ENSG00000290873	LINC03009	-	long intergenic non-protein coding RNA 3009	ncRNA
7719	chr5	25890816	25892192	+	21	NA	Intergenic	LTR37-int|LTR|ERV1	700551	NR_136209	105374693		NR_136209		LINC02211	-	long intergenic non-protein coding RNA 2211	ncRNA
20804	chr10	74032914	74034972	+	21	NA	intron (NM_014000, intron 1 of 21)	L2b|LINE|L2	35827	NM_003373	7414		NM_003373	ENSG00000035403	VCL	CMD1W|CMH15|HEL114|MV|MVCL|VINC	vinculin	protein-coding
6508	chr12	95083646	95084423	+	21	NA	intron (NM_018351, intron 20 of 20)	intron (NM_018351, intron 20 of 20)	-10416	NM_001032287	7181		NM_003297	ENSG00000120798	NR2C1	TR2	nuclear receptor subfamily 2 group C member 1	protein-coding
5881	chr16	68538935	68539699	+	21	NA	promoter-TSS (NR_130976)	promoter-TSS (NR_130976)	26	NM_001305203	146198		NM_133458	ENSG00000184939	ZFP90	FIK|NK10|ZNF756|zfp-90	ZFP90 zinc finger protein	protein-coding
8741	chr2	108384860	108386037	+	21	NA	intron (NR_135776, intron 3 of 4)	intron (NR_135776, intron 3 of 4)	7494	NM_006588	27233		NM_006588	ENSG00000198075	SULT1C4	SULT1C|SULT1C2	sulfotransferase family 1C member 4	protein-coding
22544	chr6	158040163	158042911	+	21	NA	intron (NM_003898, intron 4 of 26)	intron (NM_003898, intron 4 of 26)	24444	NM_001178088	8871		NM_003898	ENSG00000078269	SYNJ2	INPP5H	synaptojanin 2	protein-coding
16275	chr2	62196175	62197102	+	21	NA	intron (NM_006577, intron 1 of 1)	CpG-16056	523	NM_006577	10678		NM_006577	ENSG00000170340	B3GNT2	3-Gn-T1|3-Gn-T2|B3GN-T2|B3GNT|B3GNT-2|B3GNT1|BETA3GNT|BGNT2|BGnT-2|beta-1|beta3Gn-T1|beta3Gn-T2	UDP-GlcNAc:betaGal beta-1,3-N-acetylglucosaminyltransferase 2	protein-coding
7968	chr1	40449774	40450627	+	21	NA	promoter-TSS (NM_023070)	promoter-TSS (NM_023070)	136	NM_001369565	65243		NM_023070	ENSG00000187801	ZFP69B	ZKSCAN23B|ZNF643|ZSCAN54B	ZFP69 zinc finger protein B	protein-coding
8568-2	chr4	55346175	55347206	+	21	NA	intron (NM_024592, intron 1 of 4)	CpG	448	NM_024592	79644		NM_024592	ENSG00000128039	SRD5A3	CDG1P|CDG1Q|KRIZI|S5AR|S5AR 3|SRD5A2L|SRD5A2L1	steroid 5 alpha-reductase 3	protein-coding
17593	chr10	80686014	80687947	+	21	NA	Intergenic	MER49|LTR|ERV1	37183	NR_155749	105378386		NR_155749	ENSG00000231082	LINC02655	-	long intergenic non-protein coding RNA 2655	ncRNA
9640-2	chr3	120864512	120865355	+	21	NA	Intergenic	Intergenic	-28576	NR_135571	101926983		NR_135570	ENSG00000243593	LINC02049	-	long intergenic non-protein coding RNA 2049	ncRNA
13818	chr4	99945809	99946698	+	21	NA	intron (NM_001031723, intron 1 of 7)	CpG	365	NM_001278310	79982		NM_024920	ENSG00000164031	DNAJB14	EGNR9427|PRO34683	DnaJ heat shock protein family (Hsp40) member B14	protein-coding
16525	chr10	121929625	121931146	+	21	NA	intron (NR_120495, intron 1 of 1)	LTR5B|LTR|ERVK	-1584	NM_001288736	11101		NM_007041	ENSG00000107669	ATE1	-	arginyltransferase 1	protein-coding
9884	chr1	47477726	47478707	+	21	NA	Intergenic	Intergenic	40172	NM_004474	2306		NM_004474	ENSG00000186564	FOXD2	FKHL17|FREAC-9|FREAC9	forkhead box D2	protein-coding
10157	chr11	3807725	3809131	+	21	NA	promoter-TSS (NM_001256239)	promoter-TSS (NM_001256239)	-132	NM_001256239	27315		NM_014489	ENSG00000148985	PGAP2	CWH43-N|FRAG1|HPMRS3|MRT17|MRT21	post-GPI attachment to proteins 2	protein-coding
11709	chr5	147837455	147839412	+	21	NA	intron (NM_001354966, intron 1 of 4)	intron (NM_001354966, intron 1 of 4)	763	NM_001354966	6690		NM_003122	ENSG00000164266	SPINK1	PCTT|PSTI|Spink3|TATI|TCP	serine peptidase inhibitor Kazal type 1	protein-coding
10401	chr7	6376755	6377568	+	21	NA	intron (NM_018890, intron 1 of 6)	intron (NM_018890, intron 1 of 6)	2634	NM_006908	5879		NM_006908	ENSG00000136238	RAC1	MIG5|MRD48|Rac-1|TC-25|p21-Rac1	Rac family small GTPase 1	protein-coding
8623	chr17	81891570	81892442	+	21	NA	promoter-TSS (NM_001289420)	promoter-TSS (NM_001289420)	79	NM_001289420	51529		NM_016476	ENSG00000141552	ANAPC11	APC11|Apc11p|HSPC214	anaphase promoting complex subunit 11	protein-coding
6255	chr6	110738830	110739512	+	21	NA	intron (NM_015076, intron 2 of 12)	MLT1A0|LTR|ERVL-MaLR	-75450	NM_001287215	262		NM_001634	ENSG00000123505	AMD1	ADOMETDC|AMD|SAMDC	adenosylmethionine decarboxylase 1	protein-coding
12684	chr16	67226585	67227615	+	21	NA	promoter-TSS (NM_012163)	promoter-TSS (NM_012163)	-30	NM_014187	29100		NM_014187	ENSG00000168701	TMEM208	HSPC171|SND2|hSND2	transmembrane protein 208	protein-coding
12351	chr2	79393605	79395369	+	21	NA	Intergenic	Intergenic	106357	NR_110289	101927987		NR_110289		CTNNA2-AS1	-	CTNNA2 antisense RNA 1	ncRNA
11444	chr9	104903200	104904755	+	21	NA	intron (NM_005502, intron 1 of 49)	intron (NM_005502, intron 1 of 49)	24178	NM_005502	19		NM_005502	ENSG00000165029	ABCA1	ABC-1|ABC1|CERP|HDLCQTL13|HDLDT1|HPALP1|TGD	ATP binding cassette subfamily A member 1	protein-coding
13097	chr6	95576885	95578396	+	21	NA	promoter-TSS (NR_104136)	promoter-TSS (NR_104136)	105	NM_024641	79694		NM_024641	ENSG00000172469	MANEA	ENDO|hEndo	mannosidase endo-alpha	protein-coding
13630	chr9	94745948	94747853	+	21	NA	intron (NM_001193331, intron 1 of 7)	intron (NM_001193331, intron 1 of 7)	-12749	NM_001193329	84909		NM_032823	ENSG00000148120	AOPEP	AP-O|APO|C90RF3|C9orf3|DYT31|ONPEP	aminopeptidase O (putative)	protein-coding
8224	chr19	33373205	33373996	+	21	NA	promoter-TSS (NM_001806)	promoter-TSS (NM_001806)	-109	NM_001806	1054		NM_001806	ENSG00000153879	CEBPG	GPE1BP|IG/EBP-1	CCAAT enhancer binding protein gamma	protein-coding
14453	chrX	151396239	151397872	+	21	NA	promoter-TSS (NM_001017980)	promoter-TSS (NM_001017980)	-130	NM_001017980	203547		NM_001017980	ENSG00000160131	VMA21	MEAX|XMEA	vacuolar ATPase assembly factor VMA21	protein-coding
18687	chr10	101007926	101009278	+	21	NA	TTS (NM_001318099)	TTS (NM_001318099)	6105	NM_001318101	84445		NM_032429	ENSG00000107816	LZTS2	LAPSER1	leucine zipper tumor suppressor 2	protein-coding
10428	chr14	64437448	64438762	+	21	NA	intron (NM_001364837, intron 16 of 26)	AluSp|SINE|Alu	-27394	NM_004857	9495		NM_004857	ENSG00000179841	AKAP5	AKAP75|AKAP79|H21	A-kinase anchoring protein 5	protein-coding
9287-2	chr6	142232003	142233161	+	21	NA	Intergenic	L1P2|LINE|L1	-69337	NM_001032395	57211		NM_020455	ENSG00000112414	ADGRG6	APG1|DREG|GPR126|LCCS9|PR126|PS1TP2|VIGR	adhesion G protein-coupled receptor G6	protein-coding
7508	chr19	53365196	53366321	+	21	NA	promoter-TSS (NM_001348157)	promoter-TSS (NM_001348157)	53	NM_001348157	170958		NM_001348156	ENSG00000203326	ZNF525	-	zinc finger protein 525	protein-coding
9988	chr8	38070796	38072253	+	21	NA	Intergenic	LTR6A|LTR|ERV1	-33969	NM_001282272	9070		NM_004674	ENSG00000129691	ASH2L	ASH2|ASH2L1|ASH2L2|Bre2	ASH2 like, histone lysine methyltransferase complex subunit	protein-coding
13796	chr2	207969961	207971498	+	21	NA	intron (NM_001080475, intron 3 of 7)	intron (NM_001080475, intron 3 of 7)	54798	NM_001080475	389072		NM_001080475	ENSG00000178385	PLEKHM3	DAPR|PLEKHM1L	pleckstrin homology domain containing M3	protein-coding
9510-2	chrX	77014481	77015417	+	21	NA	promoter-TSS (NR_110400)	promoter-TSS (NR_110400)	-417	NR_110400	101928469		NR_110400	ENSG00000280870	MIR325HG	MIR384HG	MIR325 host gene	ncRNA
28892	chr5	16893859	16896894	+	21	NA	intron (NM_012334, intron 1 of 40)	intron (NM_012334, intron 1 of 40)	40912	NM_012334	4651		NM_012334	ENSG00000145555	MYO10	MyoX	myosin X	protein-coding
8258	chr11	59845080	59846038	+	21	NA	promoter-TSS (NM_005142)	promoter-TSS (NM_005142)	-60	NM_005142	2694		NM_005142	ENSG00000134812	CBLIF	GIF|IF|IFMH|INF|TCN3	cobalamin binding intrinsic factor	protein-coding
12618	chr2	190979765	190980992	+	21	NA	intron (NM_139266, intron 19 of 22)	intron (NM_139266, intron 19 of 22)	33793	NM_001384885	6772		NM_007315	ENSG00000115415	STAT1	CANDF7|IMD31A|IMD31B|IMD31C|ISGF-3|STAT91	signal transducer and activator of transcription 1	protein-coding
15905	chr6	130365198	130366811	+	21	NA	promoter-TSS (NM_001258277)	promoter-TSS (NM_001258277)	-13	NM_001258277	114801		NM_052913	ENSG00000164484	TMEM200A	KIAA1913|TTMA|TTMC	transmembrane protein 200A	protein-coding
12992	chr3	40938949	40940305	+	21	NA	Intergenic	Intergenic	-259878	NM_001098209	1499		NM_001904	ENSG00000168036	CTNNB1	CTNNB|EVR7|MRD19|NEDSDV|armadillo	catenin beta 1	protein-coding
8744-2	chrX	27987657	27988501	+	21	NA	Intergenic	LTR22A|LTR|ERVK	-6630	NM_001017930	139425		NM_001017930	ENSG00000226372	DCAF8L1	WDR42B	DDB1 and CUL4 associated factor 8 like 1	protein-coding
23903	chr8	144498001	144498357	+	21	NA	intron (NM_032902, intron 4 of 12)	intron (NM_032902, intron 4 of 12)	-4889	NM_001382664	2875		NM_005309	ENSG00000167701	GPT	AAT1|ALT|ALT1|GPT1|SGPT	glutamic--pyruvic transaminase	protein-coding
7433	chr12	95003186	95003844	+	21	NA	intron (NM_018838, intron 1 of 3)	intron (NM_018838, intron 1 of 3)	182	NM_018838	55967		NM_018838	ENSG00000184752	NDUFA12	B17.2|DAP13|MC1DN23	NADH:ubiquinone oxidoreductase subunit A12	protein-coding
19311	chr6	25898535	25900573	+	21	NA	Intergenic	ERVL-E-int|LTR|ERVL	-25311	NM_001098486	10786		NM_006632	ENSG00000124564	SLC17A3	GOUT4|NPT4|UAQTL4	solute carrier family 17 member 3	protein-coding
6585	chr16	56356125	56357003	+	21	NA	3' UTR (NM_020988, exon 9 of 9)	3' UTR (NM_020988, exon 9 of 9)	68425	NM_001323511	267		NM_001144	ENSG00000159461	AMFR	GP78|RNF45|SPG89	autocrine motility factor receptor	protein-coding
8138	chr1	228735922	228736945	+	21	NA	intron (NM_021205, intron 1 of 2)	CpG	954	NM_021205	58480		NM_021205	ENSG00000116574	RHOU	ARHU|CDC42L1|G28K|WRCH1|hG28K	ras homolog family member U	protein-coding
10154	chr7	90900626	90901747	+	21	NA	intron (NM_012395, intron 6 of 13)	intron (NM_012395, intron 6 of 13)	191370	NM_001287137	5218		NM_012395	ENSG00000058091	CDK14	PFTAIRE1|PFTK1	cyclin dependent kinase 14	protein-coding
8332	chr6	83065350	83066159	+	21	NA	promoter-TSS (NM_001304437)	promoter-TSS (NM_001304437)	87	NM_001350602	90025		NM_198920	ENSG00000118420	UBE3D	C6orf157|H10BH|UBE2CBP|YJR141W	ubiquitin protein ligase E3D	protein-coding
13870	chr22	27849716	27851189	+	21	NA	Intergenic	Intergenic	-48696	NM_002430	4330		NM_002430	ENSG00000169184	MN1	CEBALID|MGCR|MGCR1|MGCR1-PEN|dJ353E16.2	MN1 proto-oncogene, transcriptional regulator	protein-coding
19734	chr3	18423915	18426485	+	21	NA	5' UTR (NM_002971, exon 1 of 11)	5' UTR (NM_002971, exon 1 of 11)	139	NM_001195470	6304		NM_002971	ENSG00000182568	SATB1	DEFDA|DHDBV|KTZSL	SATB homeobox 1	protein-coding
6386-2	chr6	22036019	22037085	+	21	NA	intron (NR_015410, intron 7 of 11)	intron (NR_015410, intron 7 of 11)	110641	NR_034143	729177		NR_034143		NBAT1	CASC14|NBAT-1	neuroblastoma associated transcript 1	ncRNA
25667	chr4	156968340	156969161	+	21	NA	intron (NR_036641, intron 1 of 6)	intron (NR_036641, intron 1 of 6)	3049	NM_016205	56034		NM_016205	ENSG00000145431	PDGFC	FALLOTEIN|SCDGF	platelet derived growth factor C	protein-coding
11853	chr10	119189358	119190696	+	21	NA	Intergenic	Intergenic	-11215	NR_126105	10935		NM_006793	ENSG00000165672	PRDX3	AOP-1|AOP1|HBC189|MER5|PPPCD|PRO1748|SCAR32|SP-22|prx-III	peroxiredoxin 3	protein-coding
7460	chr1	84719827	84720769	+	21	NA	Intergenic	Intergenic	-29830	NM_001166295	117178		NM_014021	ENSG00000117155	SSX2IP	ADIP|hMsd1	SSX family member 2 interacting protein	protein-coding
10802	chr17	68438155	68438899	+	21	NA	intron (NR_135470, intron 4 of 12)	intron (NR_135470, intron 4 of 12)	-13979	NR_030365	693220		NR_030365	ENSG00000207561	MIR635	MIRN635|hsa-mir-635	microRNA 635	ncRNA
10010	chr6	47187702	47189115	+	21	NA	Intergenic	Intergenic	121497	NM_014452	27242		NM_014452	ENSG00000146072	TNFRSF21	BM-018|CD358|DR6	TNF receptor superfamily member 21	protein-coding
10806-3	chrX	16870601	16871807	+	21	NA	promoter-TSS (NM_002893)	promoter-TSS (NM_002893)	-842	NM_002893	5931		NM_002893	ENSG00000102054	RBBP7	RbAp46	RB binding protein 7, chromatin remodeling factor	protein-coding
10099	chr6	43476988	43478475	+	21	NA	intron (NM_001350564, intron 1 of 9)	intron (NM_001350564, intron 1 of 9)	161	NM_001350564	93643		NM_080604	ENSG00000137221	TJAP1	PILT|TJP4	tight junction associated protein 1	protein-coding
17307	chr5	83095235	83097114	+	21	NA	intron (NM_022550, intron 1 of 7)	L1M3a|LINE|L1	18627	NM_003401	7518		NM_003401	ENSG00000152422	XRCC4	SSMED|hXRCC4	X-ray repair cross complementing 4	protein-coding
21404-2	chr19	2051209	2051863	+	21	NA	promoter-TSS (NM_017572)	promoter-TSS (NM_017572)	-292	NM_017572	2872		NM_017572	ENSG00000099875	MKNK2	GPRK7|MNK2	MAPK interacting serine/threonine kinase 2	protein-coding
7263	chr18	70641144	70641668	+	21	NA	intron (NR_160904, intron 2 of 2)	intron (NR_160904, intron 2 of 2)	9548	NR_160904	220158		NM_178506	ENSG00000263417	GTSCR1	-	Gilles de la Tourette syndrome chromosome region, candidate 1	ncRNA
8201-5	chr21_GL383581v2_alt	84184	84716	+	21	NA	promoter-TSS (NR_040016).2	promoter-TSS (NR_040016).2	-312	NR_040016	757		NM_006134	ENSG00000142188	TMEM50B	C21orf4|HCVP7TP3	transmembrane protein 50B	protein-coding
11726	chr2	132346915	132348046	+	21	NA	Intergenic	Intergenic	-5187	NR_135203	339742		NR_135203		FAM201B	-	family with sequence similarity 201 member B	ncRNA
7383	chr10	54440892	54442223	+	21	NA	intron (NM_001142768, intron 2 of 32)	intron (NM_001142768, intron 2 of 32)	-44673	NR_134503	105378311		NR_134503	ENSG00000234173	LOC105378311	-	uncharacterized LOC105378311	ncRNA
9979-2	chr9	14308560	14310013	+	21	NA	intron (NM_001369468, intron 1 of 8)	intron (NM_001369468, intron 1 of 8)	-1251	NM_001369465	4781		NM_005596	ENSG00000147862	NFIB	CTF|HMGIC/NFIB|MACID|NF-I/B|NF1-B|NFI-B|NFI-RED|NFIB2|NFIB3	nuclear factor I B	protein-coding
13138	chr15	40405350	40406258	+	21	NA	promoter-TSS (NM_001354598)	promoter-TSS (NM_001354598)	9	NM_002225	3712		NM_002225	ENSG00000128928	IVD	ACAD2|IVDH	isovaleryl-CoA dehydrogenase	protein-coding
9814-2	chr14	21556972	21557965	+	21	NA	Intergenic	Intergenic	13276	NM_001005465	26533		NM_001005465	ENSG00000169208	OR10G3	OR14-40	olfactory receptor family 10 subfamily G member 3	protein-coding
19667	chr22_KI270876v1_alt	235417	237529	+	21	NA	intron (NM_001349999, intron 1 of 12)	intron (NM_001349999, intron 1 of 12)	23424	NM_001082579	23543		NM_014309	ENSG00000100320	RBFOX2	FOX2|Fox-2|HNRBP2|HRNBP2|RBM9|RTA|dJ106I20.3|fxh	RNA binding fox-1 homolog 2	protein-coding
13871	chr2	47339914	47341259	+	21	NA	intron (NR_110208, intron 1 of 4)	intron (NR_110208, intron 1 of 4)	4488	NR_110208	101927043		NR_110207	ENSG00000234690	EPCAM-DT	-	EPCAM divergent transcript	ncRNA
9415	chr4	142347851	142349200	+	21	NA	intron (NM_001385334, intron 6 of 24)	intron (NM_001385334, intron 6 of 24)	-42581	NM_001385459	8821		NM_003866	ENSG00000109452	INPP4B	-	inositol polyphosphate-4-phosphatase type II B	protein-coding
25323	chr17	76381199	76384230	+	21	NA	promoter-TSS (NM_001355139)	promoter-TSS (NM_001355139)	-490	NM_001355139	8877		NM_021972	ENSG00000176170	SPHK1	SPHK	sphingosine kinase 1	protein-coding
6814-3	chr4	25154748	25155460	+	21	NA	exon (NM_016955, exon 5 of 11)	exon (NM_016955, exon 5 of 11)	5345	NM_016955	51091		NM_016955	ENSG00000109618	SEPSECS	LP|PCH2D|SLA|SLA-p35|SLA/LP|SecS	Sep (O-phosphoserine) tRNA:Sec (selenocysteine) tRNA synthase	protein-coding
7206	chr13	41001529	41002809	+	21	NA	intron (NM_001370329, intron 1 of 9)	intron (NM_001370329, intron 1 of 9)	17147	NM_001370332	1997		NM_172373	ENSG00000120690	ELF1	EFTUD1|RIA1	E74 like ETS transcription factor 1	protein-coding
10082	chr4	113901666	113903457	+	21	NA	exon (NM_024590, exon 2 of 2)	exon (NM_024590, exon 2 of 2)	77086	NM_001354211	79642		NM_024590	ENSG00000180801	ARSJ	ASJ	arylsulfatase family member J	protein-coding
11178	chr16	89657262	89658828	+	21	NA	promoter-TSS (NR_073516)	promoter-TSS (NR_073516)	-2	NM_001271909	124045		NM_153025	ENSG00000167523	SPATA33	C16orf55	spermatogenesis associated 33	protein-coding
11927	chrX	71067489	71068976	+	21	NA	exon (NM_001256187, exon 1 of 3)	exon (NM_001256187, exon 1 of 3)	102	NM_013346	29934		NM_013346	ENSG00000147164	SNX12	-	sorting nexin 12	protein-coding
26148	chr4	71597010	71597333	+	21	NA	Intergenic	MSTD|LTR|ERVL-MaLR	186908	NM_000583	2638		NM_000583	ENSG00000145321	GC	DBP|DBP-maf|DBP/GC|GRD3|Gc-MAF|GcMAF|HEL-S-51|VDB|VDBG|VDBP	GC vitamin D binding protein	protein-coding
20328	chr1	219038543	219041324	+	21	NA	intron (NR_031644, intron 6 of 6)	intron (NR_031644, intron 6 of 6)	-121422	NR_146917	105372925		NR_146917		LINC01710	-	long intergenic non-protein coding RNA 1710	ncRNA
6900	chr10	18650863	18652150	+	21	NA	promoter-TSS (NM_001351117)	promoter-TSS (NM_001351117)	81	NM_182543	221078		NM_182543	ENSG00000241058	NSUN6	4933414E04Rik|ARL5B-AS1|MRT82|NOPD1	NOP2/Sun RNA methyltransferase 6	protein-coding
32385	chr2	47076280	47077912	+	21	NA	TTS (NM_001288955)	TTS (NM_001288955)	78212	NM_001163561	285051		NM_173649	ENSG00000239605	STPG4	C2orf61|GSE	sperm-tail PG-rich repeat containing 4	protein-coding
24553	chr20	9690150	9693590	+	21	NA	intron (NM_177990, intron 2 of 9)	intron (NM_177990, intron 2 of 9)	147206	NM_020341	57144		NM_020341	ENSG00000101349	PAK5	PAK7	p21 (RAC1) activated kinase 5	protein-coding
9374	chr1	143251341	143252358	+	21	NA	Intergenic	Intergenic	170743	NR_027354	645166		NR_027354	ENSG00000288905	LSP1P5	-	LSP1 pseudogene 5	pseudo
13508	chr13	41546779	41548250	+	21	NA	Intergenic	Intergenic	20881	NR_049803	100847026		NR_049803	ENSG00000284584	MIR5006	-	microRNA 5006	ncRNA
7866	chr1	26176916	26177903	+	21	NA	promoter-TSS (NM_001297648)	promoter-TSS (NM_001297648)	-82	NM_006314	10256		NM_006314	ENSG00000142675	CNKSR1	CNK|CNK1	connector enhancer of kinase suppressor of Ras 1	protein-coding
17105	chr6	167203306	167204781	+	21	NA	Intergenic	Intergenic	-24257	NR_157263	112590798		NR_157263	ENSG00000280707	HPAT5	-	human pluripotency-associated transcript 5	ncRNA
22283	chr20	4160167	4162993	+	21	NA	intron (NM_175840, intron 1 of 7)	intron (NM_175840, intron 1 of 7)	12752	NM_175842	54498		NM_019025	ENSG00000088826	SMOX	C20orf16|PAO|PAO-1|PAO1|PAOH|PAOH1|SMO	spermine oxidase	protein-coding
8944	chr8	83133734	83134706	+	21	NA	Intergenic	LTR39|LTR|ERV1	222116	NR_134295	101927141		NR_134295	ENSG00000254394	LOC101927141	-	uncharacterized LOC101927141	ncRNA
9052	chr1	84365773	84367022	+	21	NA	intron (NR_003927, intron 5 of 6)	intron (NR_003927, intron 5 of 6)	18404	NR_003927	391051		NR_003927		UOX	UOXP|URICASE	urate oxidase (pseudogene)	pseudo
11159	chr6	134453442	134454673	+	21	NA	intron (NR_038219, intron 2 of 4)	intron (NR_038219, intron 2 of 4)	15667	NR_038219	154092		NR_038216	ENSG00000236700	LINC01010	-	long intergenic non-protein coding RNA 1010	ncRNA
17020	chr2	216649270	216651698	+	21	NA	intron (NM_000597, intron 1 of 3)	intron (NM_000597, intron 1 of 3)	-9083	NM_001313990	3485		NM_000597	ENSG00000115457	IGFBP2	IBP2|IGF-BP53	insulin like growth factor binding protein 2	protein-coding
9021-2	chr4	177309409	177310360	+	21	NA	promoter-TSS (NM_018248)	promoter-TSS (NM_018248)	10	NM_018248	55247		NM_018248	ENSG00000109674	NEIL3	FGP2|FPG2|NEI3|ZGRF3|hFPG2|hNEI3	nei like DNA glycosylase 3	protein-coding
8912	chr15	64893543	64894657	+	21	NA	Intergenic	Intergenic	-17802	NM_182703	348094		NM_182703	ENSG00000166839	ANKDD1A	-	ankyrin repeat and death domain containing 1A	protein-coding
11451	chr10	102449257	102450450	+	21	NA	promoter-TSS (NR_038937)	promoter-TSS (NR_038937)	36	NR_038937	100505761		NR_038937	ENSG00000269609	C10orf95-AS1	RPARP-AS1	C10orf95 antisense RNA 1	ncRNA
20994	chr5	155458888	155462038	+	21	NA	Intergenic	Intergenic	446708	NM_001099293	285643		NM_001099293	ENSG00000226650	KIF4B	-	kinesin family member 4B	protein-coding
8155	chr18	27967977	27968682	+	21	NA	intron (NM_001792, intron 14 of 15)	intron (NM_001792, intron 14 of 15)	68312	NM_001308176	1000		NM_001792	ENSG00000170558	CDH2	ACOGS|ADHD8|ARVD14|CD325|CDHN|CDw325|NCAD	cadherin 2	protein-coding
11841	chr6	87212812	87214342	+	21	NA	intron (NM_015021, intron 1 of 7)	LTR10A|LTR|ERV1	58012	NM_001351444	23036		NM_015021	ENSG00000188994	ZNF292	MRD63|MRD64|Nbla00365|ZFP292|ZN-16|Zn-15|bA393I2.3	zinc finger protein 292	protein-coding
6928	chr17	12020364	12021274	+	21	NA	promoter-TSS (NM_003010)	promoter-TSS (NM_003010)	-58	NM_003010	6416		NM_003010	ENSG00000065559	MAP2K4	JNKK|JNKK1|MAPKK4|MEK4|MKK4|PRKMK4|SAPKK-1|SAPKK1|SEK1|SERK1|SKK1	mitogen-activated protein kinase kinase 4	protein-coding
13231	chr10	122330920	122332594	+	21	NA	intron (NM_144587, intron 12 of 15)	intron (NM_144587, intron 12 of 15)	-42951	NM_001377241	59338		NM_021622	ENSG00000107679	PLEKHA1	TAPP1	pleckstrin homology domain containing A1	protein-coding
7803	chr1	8155428	8156208	+	21	NA	Intergenic	Intergenic	-52854	NR_125998	102724539		NR_125998	ENSG00000227634	LINC01714	-	long intergenic non-protein coding RNA 1714	ncRNA
5922	chr4	95232466	95233167	+	21	NA	intron (NM_003728, intron 7 of 15)	intron (NM_003728, intron 7 of 15)	141325	NM_001256794	658		NM_001203	ENSG00000138696	BMPR1B	ALK-6|ALK6|AMD3|AMDD|BDA1D|BDA2|CDw293	bone morphogenetic protein receptor type 1B	protein-coding
6578	chr11	56884785	56885737	+	21	NA	Intergenic	Intergenic	36783	NR_110136	101927120		NR_110136	ENSG00000255433	LINC02735	-	long intergenic non-protein coding RNA 2735	ncRNA
8465	chr7	66413631	66414270	+	21	NA	Intergenic	CpG	-13542	NR_026873	285908		NM_181722	ENSG00000179406	LINC00174	NCRNA00174	long intergenic non-protein coding RNA 174	ncRNA
12205	chr10	122374019	122375743	+	21	NA	5' UTR (NM_001377235, exon 1 of 13)	5' UTR (NM_001377235, exon 1 of 13)	173	NM_001377258	59338		NM_021622	ENSG00000107679	PLEKHA1	TAPP1	pleckstrin homology domain containing A1	protein-coding
9369	chr20	64062027	64063109	+	21	NA	promoter-TSS (NM_003195)	promoter-TSS (NM_003195)	-630	NM_003195	6919		NM_003195	ENSG00000171703	TCEA2	TFIIS	transcription elongation factor A2	protein-coding
15845	chr11	66346796	66347668	+	21	NA	promoter-TSS (NR_135761)	promoter-TSS (NR_135761)	397	NM_006876	11041		NM_006876	ENSG00000174684	B4GAT1	B3GN-T1|B3GNT1|B3GNT6|BETA3GNTI|MDDGA13|iGAT|iGNT	beta-1,4-glucuronyltransferase 1	protein-coding
19968	chr15	83206446	83207587	+	21	NA	intron (NM_016073, intron 1 of 5)	CpG	807	NM_016073	50810		NM_016073	ENSG00000166503	HDGFL3	CGI-142|HDGF-2|HDGF2|HDGFRP3|HRP-3	HDGF like 3	protein-coding
9473	chr1	35178864	35179962	+	21	NA	intron (NR_136702, intron 9 of 11)	intron (NR_136702, intron 9 of 11)	13732	NR_136702	6421		NM_005066	ENSG00000116560	SFPQ	POMP100|PPP1R140|PSF	splicing factor proline and glutamine rich	protein-coding
12151	chr19	18340561	18342258	+	21	NA	intron (NM_001329477, intron 1 of 3)	intron (NM_001329477, intron 1 of 3)	811	NM_001329476	54858		NM_017712	ENSG00000130517	PGPEP1	PAP-I|PGI|PGP|PGP-I|PGPI|Pcp	pyroglutamyl-peptidase I	protein-coding
10345	chr8	9247769	9249376	+	21	NA	Intergenic	Intergenic	59573	NR_125431	101929128		NR_125431	ENSG00000248538	LOC101929128	-	uncharacterized LOC101929128	ncRNA
13269-3	chr9	85741009	85741953	+	21	NA	intron (NM_001330701, intron 1 of 25)	CpG	473	NM_001330701	23287		NM_015239	ENSG00000135049	AGTPBP1	CCP1|CONDCA|NNA1	ATP/GTP binding carboxypeptidase 1	protein-coding
17759	chr12	30753898	30754791	+	21	NA	promoter-TSS (NR_135046)	promoter-TSS (NR_135046)	170	NM_023925	65981		NM_023925	ENSG00000110888	CAPRIN2	C1QDC1|EEG-1|EEG1|RNG140	caprin family member 2	protein-coding
10816	chr20	11214391	11215747	+	21	NA	Intergenic	Intergenic	58314	NR_038972	339593		NR_038972		LOC339593	-	uncharacterized LOC339593	ncRNA
14409-2	chr5	56122792	56124330	+	21	NA	intron (NM_024669, intron 8 of 11)	intron (NM_024669, intron 8 of 11)	109769	NM_024669	79722		NM_024669	ENSG00000164512	ANKRD55	-	ankyrin repeat domain 55	protein-coding
11065-2	chr9	78030224	78031341	+	21	NA	intron (NM_002072, intron 1 of 6)	intron (NM_002072, intron 1 of 6)	1029	NM_002072	2776		NM_002072	ENSG00000156052	GNAQ	CMAL|CMC1|G-ALPHA-q|GAQ|SWS	G protein subunit alpha q	protein-coding
15033-2	chr2	32627305	32628409	+	21	NA	promoter-TSS (NM_017735)	promoter-TSS (NM_017735)	-193	NM_017735	55622		NM_017735	ENSG00000018699	TTC27	-	tetratricopeptide repeat domain 27	protein-coding
9930	chr10	100179344	100180753	+	21	NA	intron (NR_144755, intron 2 of 11)	intron (NR_144755, intron 2 of 11)	5981	NM_001347858	10613		NM_006459	ENSG00000107566	ERLIN1	C10orf69|Erlin-1|KE04|KEO4|SPFH1|SPG62	ER lipid raft associated 1	protein-coding
8597	chr19	23116691	23117648	+	21	NA	5' UTR (NM_001277403, exon 1 of 4)	5' UTR (NM_001277403, exon 1 of 4)	144	NM_001277403	100129543		NM_001277403	ENSG00000183850	ZNF730	-	zinc finger protein 730	protein-coding
7517	chr15	89197221	89198085	+	21	NA	3' UTR (NM_007011, exon 15 of 15)	3' UTR (NM_007011, exon 15 of 15)	23926	NM_000326	6017		NM_000326	ENSG00000140522	RLBP1	CRALBP	retinaldehyde binding protein 1	protein-coding
12123-2	chr4	99088447	99089896	+	21	NA	promoter-TSS (NM_000671)	promoter-TSS (NM_000671)	314	NR_037884	100507053		NR_037884	ENSG00000246090	LOC100507053	-	uncharacterized LOC100507053	ncRNA
7421-2	chr22	41845624	41846474	+	21	NA	intron (NR_103834, intron 1 of 21)	intron (NR_103834, intron 1 of 21)	-11384	NR_157279	112637020		NR_157279		SREBF2-AS1	821D11.7|RP5	SREBF2 antisense RNA 1	ncRNA
7889	chr10	95475642	95475685	+	21	NA	intron (NM_001384455, intron 1 of 25)	MIR|SINE|MIR	-34483	NM_001034956	10580		NM_006434	ENSG00000095637	SORBS1	CAP|FLAF2|R85FL|SH3D5|SH3P12|SORB1	sorbin and SH3 domain containing 1	protein-coding
7000	chr2	64105651	64106519	+	21	NA	intron (NM_020651, intron 2 of 6)	intron (NM_020651, intron 2 of 6)	38335	NM_020651	57162		NM_020651	ENSG00000197329	PELI1	-	pellino E3 ubiquitin protein ligase 1	protein-coding
9385	chr12	108733920	108734951	+	21	NA	Intergenic	MIRb|SINE|MIR	-2917	NM_014325	23603		NM_014325	ENSG00000110880	CORO1C	HCRNN4	coronin 1C	protein-coding
23100	chr11	319856	321397	+	21	NA	exon (NM_021034, exon 1 of 2)	exon (NM_021034, exon 1 of 2)	234	NR_049759	10410		NM_021034	ENSG00000142089	IFITM3	1-8U|DSPA2b|IP15	interferon induced transmembrane protein 3	protein-coding
6080-3	chr21	28247125	28248120	+	21	NA	Intergenic	Intergenic	-18955	NR_126012	101927973		NR_126012	ENSG00000236532	LINC01695	-	long intergenic non-protein coding RNA 1695	ncRNA
15831	chr7	148698689	148700459	+	21	NA	promoter-TSS (NM_001370664)	promoter-TSS (NM_001370664)	-136	NM_001370664	8454		NM_003592	ENSG00000055130	CUL1	-	cullin 1	protein-coding
8461	chr12	109995782	109996464	+	21	NA	intron (NM_139201, intron 1 of 14)	CpG	245	NM_057170	9815		NM_014776	ENSG00000139436	GIT2	CAT-2|CAT2|PKL	GIT ArfGAP 2	protein-coding
7730-2	chr3	32316162	32317550	+	21	NA	intron (NM_001320308, intron 1 of 2)	intron (NM_001320308, intron 1 of 2)	-74997	NM_181472	112616		NM_138410	ENSG00000153551	CMTM7	CKLFSF7	CKLF like MARVEL transmembrane domain containing 7	protein-coding
12341	chr11	69427201	69429120	+	21	NA	3' UTR (NM_001319657, exon 2 of 2)	3' UTR (NM_001319657, exon 2 of 2)	2505	NM_001319657	102724265		NM_001319657	ENSG00000255980	LINC02953	-	long intergenic non-protein coding RNA 2953	ncRNA
23545	chrUn_GL000214v1	116313	119145	+	21	NA	NA	ACRO1|Satellite|acro	NA	NA
8600	chrX	113399595	113400733	+	21	NA	intron (NR_110399, intron 3 of 3)	MER21C|LTR|ERVL	357437	NR_110399	101928437		NR_110399		LOC101928437	-	uncharacterized LOC101928437	ncRNA
10335	chr1	200316301	200317399	+	21	NA	Intergenic	Intergenic	56942	NR_040064	554279		NR_040064	ENSG00000203721	LINC00862	C1orf98|SMIM16	long intergenic non-protein coding RNA 862	ncRNA
9717	chr5	80115849	80117136	+	21	NA	intron (NR_126061, intron 11 of 13)	intron (NR_126061, intron 11 of 13)	-32827	NR_109930	101929215		NR_109930	ENSG00000249825	THBS4-AS1	CTD-2201I18.1	THBS4 antisense RNA 1	ncRNA
12763	chr2	182866308	182867588	+	21	NA	promoter-TSS (NM_001463)	promoter-TSS (NM_001463)	-311	NM_001463	2487		NM_001463	ENSG00000162998	FRZB	FRE|FRITZ|FRP-3|FRZB-1|FRZB-PEN|FRZB1|FZRB|OS1|SFRP3|SRFP3|hFIZ	frizzled related protein	protein-coding
13659-2	chr19	18436080	18437488	+	21	NA	exon (NM_016368, exon 5 of 11)	exon (NM_016368, exon 5 of 11)	525	NM_001253389	51477		NM_016368	ENSG00000105655	ISYNA1	INO1|INOS|IPS|IPS 1|IPS-1	inositol-3-phosphate synthase 1	protein-coding
7535	chr13	46684423	46685372	+	21	NA	intron (NM_015116, intron 4 of 18)	intron (NM_015116, intron 4 of 18)	112264	NM_001984	2098		NM_001984	ENSG00000139684	ESD	FGH	esterase D	protein-coding
9932	chr12	94432764	94434170	+	21	NA	intron (NM_001368040, intron 1 of 15)	AluJb|SINE|Alu	26400	NR_160431	51134		NM_016122	ENSG00000173588	CEP83	CCDC41|NPHP18|NY-REN-58	centrosomal protein 83	protein-coding
9634-2	chrX	98379902	98381758	+	21	NA	Intergenic	MER61B|LTR|ERV1	-816295	NR_125391	10824		NR_125391	ENSG00000236256	DIAPH2-AS1	EPAG	DIAPH2 antisense RNA 1	ncRNA
13010-2	chr9	71761874	71763556	+	21	NA	intron (NM_001135820, intron 1 of 22)	intron (NM_001135820, intron 1 of 22)	5798	NM_001135820	23670		NM_013390	ENSG00000135048	CEMIP2	TMEM2	cell migration inducing hyaluronidase 2	protein-coding
11712	chr17	59296610	59297986	+	21	NA	Intergenic	Intergenic	-34357	NM_001005404	388403		NM_001005404	ENSG00000175155	YPEL2	FKSG4	yippee like 2	protein-coding
18244	chr17	51120922	51122396	+	21	NA	promoter-TSS (NM_003971)	promoter-TSS (NM_003971)	-791	NM_001130528	9043		NM_003971	ENSG00000008294	SPAG9	CT89|HLC-6|HLC4|HLC6|JIP-4|JIP4|JLP|PHET|PIG6	sperm associated antigen 9	protein-coding
12801	chr17	29591097	29592581	+	21	NA	Intergenic	Intergenic	-1293	NM_152345	124930		NM_152345	ENSG00000198720	ANKRD13B	-	ankyrin repeat domain 13B	protein-coding
13817	chr7	134879509	134881483	+	21	NA	intron (NM_033138, intron 3 of 14)	intron (NM_033138, intron 3 of 14)	-10904	NM_033139	800		NM_004342	ENSG00000122786	CALD1	CDM|H-CAD|HCAD|L-CAD|LCAD|NAG22|h-CD	caldesmon 1	protein-coding
12812	chr20	63706642	63708221	+	21	NA	promoter-TSS (NM_032527)	promoter-TSS (NM_032527)	-11	NM_001083113	84619		NM_032527	ENSG00000197114	ZGPAT	GPATC6|GPATCH6|KIAA1847|ZC3H9|ZC3HDC9|ZIP	zinc finger CCCH-type and G-patch domain containing	protein-coding
18518	chr17	61235077	61236372	+	21	NA	intron (NM_001353144, intron 24 of 25)	A-rich|Low_complexity|Low_complexity	131980	NR_136397	101927855		NR_136397	ENSG00000267131	LOC101927855	-	uncharacterized LOC101927855	ncRNA
8885	chr2	163347890	163349172	+	20	NA	Intergenic	Intergenic	387477	NM_001321825	55137		NM_018086	ENSG00000182263	FIGN	-	fidgetin, microtubule severing factor	protein-coding
10191	chr4	87008945	87010104	+	20	NA	intron (NM_001313960, intron 1 of 17)	intron (NM_001313960, intron 1 of 17)	2523	NM_005935	4299		NM_005935	ENSG00000172493	AFF1	AF4|FEL|MLLT2|PBM1	ALF transcription elongation factor 1	protein-coding
18077	chr14	58978857	58980925	+	20	NA	intron (NR_110547, intron 4 of 5)	intron (NR_110547, intron 4 of 5)	151603	NR_110547	102723742		NR_110547	ENSG00000258583	LINC01500	-	long intergenic non-protein coding RNA 1500	ncRNA
10076	chr9	36486365	36487309	+	20	NA	Intergenic	Intergenic	-85639	NM_194330	152006		NM_022781	ENSG00000137075	RNF38	-	ring finger protein 38	protein-coding
9967	chr15	45048260	45049654	+	20	NA	intron (NM_003104, intron 3 of 8)	MER61F|LTR|ERV1	25762	NR_034039	6652		NM_003104	ENSG00000140263	SORD	HEL-S-95n|HMNR8|RDH|SDH|SORD1|SORDD|XDH	sorbitol dehydrogenase	protein-coding
9657	chr17	44708378	44709238	+	20	NA	non-coding (NR_148207, exon 1 of 11)	non-coding (NR_148207, exon 1 of 11)	143	NR_148207	80174		NM_025104	ENSG00000161692	DBF4B	ASKL1|CHIFB|DRF1|ZDBF1B	DBF4B-CDC7 kinase regulatory subunit	protein-coding
6899-2	chrX	21839404	21840069	+	20	NA	exon (NM_015884, exon 1 of 11)	exon (NM_015884, exon 1 of 11)	119	NM_015884	51360		NM_015884	ENSG00000012174	MBTPS2	BRESEK|IFAP|KFSD|KFSDX|OI19|OLMSX|S2P	membrane bound transcription factor peptidase, site 2	protein-coding
11947	chr7	99098343	99099976	+	20	NA	intron (NM_181349, intron 1 of 17)	L2c|LINE|L2	44949	NM_181349	57154		NM_020429	ENSG00000198742	SMURF1	-	SMAD specific E3 ubiquitin protein ligase 1	protein-coding
13821	chr2	101267157	101268782	+	20	NA	intron (NM_017546, intron 5 of 6)	intron (NM_017546, intron 5 of 6)	5080	NR_003070	692205		NR_003070	ENSG00000212283	SNORD89	HBII-289	small nucleolar RNA, C/D box 89	snoRNA
8656	chr8	37546930	37548450	+	20	NA	Intergenic	Intergenic	-26304	NR_121621	100507420		NR_121620	ENSG00000253414	LINC01605	LincDUSP|ODIR1	long intergenic non-protein coding RNA 1605	ncRNA
7714	chr1	51647929	51648995	+	20	NA	intron (NM_148906, intron 1 of 22)	intron (NM_148906, intron 1 of 22)	31370	NM_001350209	114883		NM_024586	ENSG00000117859	OSBPL9	ORP-9|ORP9	oxysterol binding protein like 9	protein-coding
13713	chr7	66204678	66205999	+	20	NA	promoter-TSS (NM_003596)	promoter-TSS (NM_003596)	4	NM_003596	8460		NM_003596	ENSG00000169902	TPST1	TANGO13A	tyrosylprotein sulfotransferase 1	protein-coding
28063	chr1	16623452	16625274	+	20	NA	intron (NR_026752, intron 5 of 6)	intron (NR_026752, intron 5 of 6)	6543	NR_026752	84809		NM_032723		CROCCP2	CROCCL1	CROCC pseudogene 2	pseudo
21608	chr3	114715098	114717639	+	20	NA	intron (NM_001348801, intron 4 of 11)	intron (NM_001348801, intron 4 of 11)	27157	NR_039959	100616166		NR_039959	ENSG00000264623	MIR4796	mir-4796	microRNA 4796	ncRNA
19183	chr6	25326138	25328721	+	20	NA	intron (NM_001173977, intron 2 of 36)	intron (NM_001173977, intron 2 of 36)	48055	NM_001173977	55604		NM_017640	ENSG00000079691	CARMIL1	CARMIL|CARMIL1a|LRRC16|LRRC16A|dJ501N12.1|dJ501N12.5	capping protein regulator and myosin 1 linker 1	protein-coding
29018	chrUn_KI270744v1	108705	110716	+	20	NA	NA	ACRO1|Satellite|acro	NA	NA
14317	chr8	143829117	143829805	+	20	NA	promoter-TSS (NM_014281)	promoter-TSS (NM_014281)	-146	NM_001271097	22827		NM_014281	ENSG00000179950	PUF60	FIR|RoBPI|SIAHBP1|VRJS	poly(U) binding splicing factor 60	protein-coding
9222	chr6	167268040	167269362	+	20	NA	Intergenic	Intergenic	-22614	NM_001143947	54346		NM_018974	ENSG00000112494	UNC93A	Unc-93A|dJ366N23.1|dJ366N23.2	unc-93 homolog A	protein-coding
7072	chr22	43010678	43011883	+	20	NA	intron (NM_001184970, intron 1 of 10)	intron (NM_001184970, intron 1 of 10)	3869	NM_001184970	11252		NM_007229	ENSG00000100266	PACSIN2	SDPII	protein kinase C and casein kinase substrate in neurons 2	protein-coding
8461-2	chr14	94560782	94561990	+	20	NA	promoter-TSS (NM_001289033)	promoter-TSS (NM_001289033)	-56	NM_006215	5267		NM_006215	ENSG00000100665	SERPINA4	KAL|KLST|KST|PI-4|PI4|kallistatin	serpin family A member 4	protein-coding
10692-2	chr17	59832791	59833471	+	20	NA	intron (NM_030938, intron 10 of 11)	intron (NM_030938, intron 10 of 11)	-8135	NR_029493	406991		NR_029493	ENSG00000284190	MIR21	MIRN21|hsa-mir-21|miR-21|miRNA21	microRNA 21	ncRNA
11763	chr6	36986248	36987191	+	20	NA	promoter-TSS (NR_130739)	promoter-TSS (NR_130739)	-168	NR_130739	23787		NM_014341	ENSG00000137409	MTCH1	CGI-64|PIG60|PSAP|SLC25A49	mitochondrial carrier 1	protein-coding
16486	chr6	125789703	125792043	+	20	NA	promoter-TSS (NM_001122842)	promoter-TSS (NM_001122842)	-87	NM_181782	135112		NM_181782	ENSG00000111912	NCOA7	ERAP140|ESNA1|NCOA7-AS|Nbla00052|Nbla10993|TLDC4|dJ187J11.3	nuclear receptor coactivator 7	protein-coding
6740	chr10	20712216	20713237	+	20	NA	Intergenic	MER4D1|LTR|ERV1	160756	NR_039822	100616383		NR_039822	ENSG00000265372	MIR4675	-	microRNA 4675	ncRNA
7629	chr16	16074126	16074904	+	20	NA	intron (NM_004996, intron 14 of 30)	intron (NM_004996, intron 14 of 30)	124899	NM_004996	4363		NM_004996	ENSG00000103222	ABCC1	ABC29|ABCC|DFNA77|GS-X|MRP|MRP1	ATP binding cassette subfamily C member 1 (ABCC1 blood group)	protein-coding
11166	chr20	37523845	37525478	+	20	NA	promoter-TSS (NM_001167823)	promoter-TSS (NM_001167823)	-208	NM_001167823	10904		NM_006698	ENSG00000166619	BLCAP	BC10	BLCAP apoptosis inducing factor	protein-coding
8463	chr15	23503137	23504635	+	20	NA	Intergenic	MER61F|LTR|ERV1	-56643	NM_001304388	283685		NM_182561	ENSG00000174450	GOLGA6L2	CT105	golgin A6 family like 2	protein-coding
6930	chr3	156535085	156535758	+	20	NA	intron (NM_172160, intron 13 of 13)	intron (NM_172160, intron 13 of 13)	18704	NM_001308205	6747		NM_007107	ENSG00000114850	SSR3	TRAPG	signal sequence receptor subunit 3	protein-coding
10091	chr2	9331190	9332609	+	20	NA	intron (NM_001135191, intron 7 of 26)	intron (NM_001135191, intron 7 of 26)	90692	NR_134951	9270		NM_004763	ENSG00000119185	ITGB1BP1	ICAP-1A|ICAP-1B|ICAP-1alpha|ICAP1|ICAP1A|ICAP1B	integrin subunit beta 1 binding protein 1	protein-coding
9172	chr11	22674141	22675241	+	20	NA	promoter-TSS (NM_005256)	promoter-TSS (NM_005256)	-83	NM_005256	2620		NM_005256	ENSG00000148935	GAS2	GAS-2	growth arrest specific 2	protein-coding
9923-2	chr8	64798120	64799556	+	20	NA	promoter-TSS (NM_001324112)	promoter-TSS (NM_001324112)	-101	NM_004820	9420		NM_004820	ENSG00000172817	CYP7B1	CBAS3|CP7B|SPG5A	cytochrome P450 family 7 subfamily B member 1	protein-coding
18396	chr9	69178484	69181519	+	20	NA	intron (NM_004817, intron 1 of 22)	intron (NM_004817, intron 1 of 22)	5724	NM_001369873	9414		NM_004817	ENSG00000119139	TJP2	C9DUPq21.11|DFNA51|DUP9q21.11|FHCA1|PFIC4|X104|ZO2	tight junction protein 2	protein-coding
12991	chr2	73385222	73386925	+	20	NA	exon (NM_001378454, exon 1 of 23)	exon (NM_001378454, exon 1 of 23)	237	NM_001378454	7840		NM_015120	ENSG00000116127	ALMS1	ALSS	ALMS1 centrosome and basal body associated protein	protein-coding
8153	chr11	110295544	110296386	+	20	NA	intron (NM_001260496, intron 1 of 7)	CpG	649	NM_002906	5962		NM_002906	ENSG00000137710	RDX	DFNB24	radixin	protein-coding
12884-2	chr3	37905186	37907076	+	20	NA	intron (NM_005808, intron 1 of 6)	LTR33|LTR|ERVL	44251	NM_001008392	10217		NM_005808	ENSG00000144677	CTDSPL	C3orf8|HYA22|PSR1|RBSP3|SCP3	CTD small phosphatase like	protein-coding
8932	chr2	113156348	113157286	+	20	NA	Intergenic	Intergenic	-17154	NM_012455	23550		NM_012455	ENSG00000125637	PSD4	EFA6B|TIC	pleckstrin and Sec7 domain containing 4	protein-coding
10410	chr4	158800961	158802148	+	20	NA	intron (NM_020840, intron 1 of 16)	MIR|SINE|MIR	-4285	NM_001366843	57600		NM_020840	ENSG00000052795	FNIP2	FNIPL|MAPO1	folliculin interacting protein 2	protein-coding
16647	chr16	1772363	1773938	+	20	NA	promoter-TSS (NM_001257370)	promoter-TSS (NM_001257370)	-16	NM_023936	65993		NM_023936	ENSG00000074071	MRPS34	COXPD32|MRP-S12|MRP-S34|MRPS12|mS34	mitochondrial ribosomal protein S34	protein-coding
9633	chr6	142322737	142324205	+	20	NA	intron (NM_001032394, intron 2 of 24)	intron (NM_001032394, intron 2 of 24)	21464	NM_198569	57211		NM_020455	ENSG00000112414	ADGRG6	APG1|DREG|GPR126|LCCS9|PR126|PS1TP2|VIGR	adhesion G protein-coupled receptor G6	protein-coding
12324	chr12	65509956	65511887	+	20	NA	intron (NR_120431, intron 2 of 3)	intron (NR_120431, intron 2 of 3)	46390	NR_135033	105369187		NR_135033	ENSG00000250748	LOC105369187	-	uncharacterized LOC105369187	ncRNA
11496	chr2	241609859	241611450	+	20	NA	intron (NM_015963, intron 2 of 5)	intron (NM_015963, intron 2 of 5)	6847	NM_001164356	51078		NM_015963	ENSG00000176946	THAP4	CGI-36|Nb(III)|PP238	THAP domain containing 4	protein-coding
8079-2	chr6	20880675	20881674	+	20	NA	intron (NM_017774, intron 9 of 15)	MER5A|DNA|hAT-Charlie	346717	NM_017774	54901		NM_017774	ENSG00000145996	CDKAL1	-	CDK5 regulatory subunit associated protein 1 like 1	protein-coding
9615	chr12	12182485	12183516	+	20	NA	intron (NM_002336, intron 5 of 22)	intron (NM_002336, intron 5 of 22)	71048	NR_128710	103504734		NR_128710	ENSG00000283475	MIR1244-4	hsa-mir-1244-4	microRNA 1244-4	ncRNA
12658	chr4	5721988	5723394	+	20	NA	intron (NM_153717, intron 2 of 20)	intron (NM_153717, intron 2 of 20)	11490	NM_001306092	2121		NM_014556	ENSG00000072840	EVC	DWF-1|EVC1|EVCL	EvC ciliary complex subunit 1	protein-coding
9070-2	chr11	129427002	129428238	+	20	NA	intron (NM_003658, intron 1 of 3)	intron (NM_003658, intron 1 of 3)	51772	NM_003658	8538		NM_003658	ENSG00000043039	BARX2	-	BARX homeobox 2	protein-coding
17203	chr3	44975182	44976711	+	20	NA	promoter-TSS (NM_015004)	promoter-TSS (NM_015004)	228	NM_001349379	51304		NM_016598	ENSG00000163812	ZDHHC3	DHHC-3|DHHC3|GODZ|ZNF373	zinc finger DHHC-type palmitoyltransferase 3	protein-coding
11663	chr3	101512286	101513597	+	20	NA	intron (NM_001077203, intron 1 of 22)	CpG	271	NM_001077203	57337		NM_020654	ENSG00000138468	SENP7	-	SUMO specific peptidase 7	protein-coding
18487	chr4	1873583	1874793	+	20	NA	intron (NM_001042424, intron 1 of 21)	intron (NM_001042424, intron 1 of 21)	2795	NM_001042424	7468		NM_007331	ENSG00000109685	NSD2	KMT3F|KMT3G|MMSET|RAUST|REIIBP|TRX5|WHS|WHSC1	nuclear receptor binding SET domain protein 2	protein-coding
9360	chr13	97307836	97309152	+	20	NA	intron (NM_001382697, intron 2 of 4)	intron (NM_001382697, intron 2 of 4)	86161	NM_001382691	10150		NM_005757	ENSG00000139793	MBNL2	MBLL|MBLL39|PRO2032	muscleblind like splicing regulator 2	protein-coding
7057-2	chr7	100605031	100605952	+	20	NA	intron (NM_002593, intron 4 of 8)	CpG-26214	-1453	NR_038910	100129845		NR_038910	ENSG00000224729	PCOLCE-AS1	-	PCOLCE antisense RNA 1	ncRNA
16097-2	chr8	143369291	143370938	+	20	NA	intron (NM_052924, intron 1 of 14)	intron (NM_052924, intron 1 of 14)	1238	NM_052924	114822		NM_052924	ENSG00000158106	RHPN1	ODF5|RHOPHILIN|RHPN	rhophilin Rho GTPase binding protein 1	protein-coding
8099	chr19	3285011	3285672	+	20	NA	intron (NM_021938, intron 9 of 12)	intron (NM_021938, intron 9 of 12)	60063	NR_033342	60680		NM_021938	ENSG00000161082	CELF5	BRUNOL-5|BRUNOL5|CELF-5	CUGBP Elav-like family member 5	protein-coding
14093	chr11	122655244	122657156	+	20	NA	exon (NM_001363365, exon 1 of 14)	exon (NM_001363365, exon 1 of 14)	478	NM_001363365	84959		NM_032873	ENSG00000154127	UBASH3B	STS-1|STS1|TULA-2|TULA2|p70	ubiquitin associated and SH3 domain containing B	protein-coding
12406	chr14	68935368	68936548	+	20	NA	intron (NM_001130004, intron 1 of 21)	intron (NM_001130004, intron 1 of 21)	43344	NM_001130004	87		NM_001102	ENSG00000072110	ACTN1	BDPLT15	actinin alpha 1	protein-coding
10126-2	chr7	126700909	126701612	+	20	NA	3' UTR (NM_001371088, exon 8 of 8)	3' UTR (NM_001371088, exon 8 of 8)	356924	NR_030323	693177		NR_030323	ENSG00000207692	MIR592	MIRN592|hsa-mir-592|mir-592	microRNA 592	ncRNA
8888	chr1	145286937	145288035	+	20	NA	Intergenic	CpG	6370	NR_104075	101954266		NR_104075	ENSG00000207501	RNVU1-14	RNU1-37|vU1.14	RNA, variant U1 small nuclear 14	snRNA
9247-3	chr9	105318856	105319995	+	20	NA	intron (NM_001330731, intron 3 of 15)	MER77B|LTR|ERVL	74774	NM_080546	23446		NM_022109	ENSG00000070214	SLC44A1	CD92|CDW92|CHTL1|CONATOC|CTL1	solute carrier family 44 member 1	protein-coding
7644-2	chr4	86891716	86892605	+	20	NA	5' UTR (NM_001369888, exon 1 of 4)	5' UTR (NM_001369888, exon 1 of 4)	262	NM_001369888	132989		NM_144645	ENSG00000163633	C4orf36	-	chromosome 4 open reading frame 36	protein-coding
13427	chr8	11640940	11642710	+	20	NA	Intergenic	MLT1K|LTR|ERVL-MaLR	-35110	NM_001308094	2626		NM_002052	ENSG00000136574	GATA4	ASD2|TACHD|TOF|VSD1	GATA binding protein 4	protein-coding
14293	chr2	111953327	111955712	+	20	NA	intron (NM_006343, intron 4 of 18)	L2b|LINE|L2	55912	NM_006343	10461		NM_006343	ENSG00000153208	MERTK	MER|RP38|Tyro12|c-Eyk|c-mer	MER proto-oncogene, tyrosine kinase	protein-coding
20578	chr19	39826733	39826900	+	20	NA	exon (NM_006483, exon 9 of 11).2	exon (NM_006483, exon 9 of 11).2	2986	NR_106777	102465974		NR_106777	ENSG00000277759	MIR6719	hsa-mir-6719	microRNA 6719	ncRNA
9210	chr5	51226007	51226870	+	20	NA	Intergenic	Intergenic	156894	NR_046243	642366		NR_046243		ISL1-DT	-	ISL1 divergent transcript	ncRNA
11814	chr3	51455574	51456791	+	20	NA	intron (NR_146065, intron 5 of 25)	L1PA4|LINE|L1	43820	NM_001171904	9730		NM_014703	ENSG00000145041	DCAF1	RIP|VPRBP	DDB1 and CUL4 associated factor 1	protein-coding
10534-2	chr3	131331236	131332258	+	20	NA	intron (NR_038976, intron 2 of 3)	L1PA3|LINE|L1	-30098	NR_002949	152195		NM_194289	ENSG00000293492	NUDT16L2P	NUDT16P|NUDT16P1	nudix hydrolase 16 like 2, pseudogene	pseudo
26430	chr2	226798160	226801911	+	20	NA	promoter-TSS (NM_001349069)	promoter-TSS (NM_001349069)	-124	NM_001349069	84236		NM_032276	ENSG00000144468	RHBDD1	RHBDL4|RRP4	rhomboid domain containing 1	protein-coding
8100	chr6	16519500	16520650	+	20	NA	intron (NM_000332, intron 6 of 8)	intron (NM_000332, intron 6 of 8)	240109	NR_152114	6310		NM_000332	ENSG00000124788	ATXN1	ATX1|D6S504E|SCA1	ataxin 1	protein-coding
8299	chr13	30463833	30464650	+	20	NA	promoter-TSS (NM_001313892)	promoter-TSS (NM_001313892)	86	NM_001313892	3146		NM_002128	ENSG00000189403	HMGB1	HMG-1|HMG1|HMG3|SBP-1	high mobility group box 1	protein-coding
8395	chr1	201481719	201482565	+	20	NA	Intergenic	Intergenic	-12954	NM_012396	23612		NM_012396	ENSG00000174307	PHLDA3	TIH1	pleckstrin homology like domain family A member 3	protein-coding
11079	chr5	82729864	82731291	+	20	NA	Intergenic	Intergenic	-109578	NR_039773	100616297		NR_039773	ENSG00000283359	MIR3977	-	microRNA 3977	ncRNA
11205	chr7	67753933	67754996	+	20	NA	Intergenic	Intergenic	-265789	NR_120514	102723427		NR_120514	ENSG00000225209	LOC102723427	-	uncharacterized LOC102723427	ncRNA
7254-2	chr5_GL339449v2_alt	114482	115445	+	20	NA	intron (NR_027386, intron 4 of 4)	intron (NR_027386, intron 4 of 4)	944	NM_001297697	202243		NM_176816	ENSG00000183323	CCDC125	KENAE	coiled-coil domain containing 125	protein-coding
5778	chr14_GL000225v1_random	99122	99993	+	20	NA	NA	BSR/Beta|Satellite|Satellite	NA	NA
8173	chr6	148328886	148329774	+	20	NA	intron (NM_001346505, intron 1 of 19)	intron (NM_001346505, intron 1 of 19)	-13508	NM_001346506	23328		NM_015278	ENSG00000111961	SASH1	CAPOK|DUH|DUH1|SH3D6A|dJ323M4.1	SAM and SH3 domain containing 1	protein-coding
7554-3	chr6	49556366	49557435	+	20	NA	intron (NR_146864, intron 4 of 4)	intron (NR_146864, intron 4 of 4)	6232	NR_146861	135398		NM_153344	ENSG00000197261	C6orf141	-	chromosome 6 open reading frame 141	protein-coding
9531	chr1	202142860	202144348	+	20	NA	intron (NM_001256129, intron 1 of 5)	intron (NM_001256129, intron 1 of 5)	1133	NM_138795	127829		NM_138795	ENSG00000143862	ARL8A	ARL10B|GIE2	ADP ribosylation factor like GTPase 8A	protein-coding
6671	chr2	207143635	207144149	+	20	NA	intron (NM_001270943, intron 1 of 3)	intron (NM_001270943, intron 1 of 3)	-9755	NM_001270944	8609		NM_003709	ENSG00000118263	KLF7	UKLF	KLF transcription factor 7	protein-coding
11469	chr7	111930507	111931839	+	20	NA	intron (NM_014705, intron 12 of 51)	intron (NM_014705, intron 12 of 51)	122668	NR_103806	100506413		NR_103806	ENSG00000225572	DOCK4-AS1	-	DOCK4 antisense RNA 1	ncRNA
10328	chr9	136546171	136547474	+	20	NA	promoter-TSS (NM_017617)	promoter-TSS (NM_017617)	-563	NR_039821	100616301		NR_039821	ENSG00000265181	MIR4674	-	microRNA 4674	ncRNA
7614	chr1	156006711	156007616	+	20	NA	Intergenic	Intergenic	13788	NM_003145	6746		NM_003145	ENSG00000163479	SSR2	HSD25|TLAP|TRAP-BETA|TRAPB	signal sequence receptor subunit 2	protein-coding
14289-2	chr1	170536768	170538945	+	20	NA	intron (NM_001320252, intron 3 of 6)	intron (NM_001320252, intron 3 of 6)	-5247	NR_125958	101928650		NR_125958		GORAB-AS1	-	GORAB antisense RNA 1	ncRNA
15000	chr22	38696272	38697964	+	20	NA	intron (NM_014876, intron 2 of 4)	L2b|LINE|L2	3825	NM_001360236	9929		NM_014876	ENSG00000100221	JOSD1	dJ508I15.2	Josephin domain containing 1	protein-coding
17680	chr12	32106205	32107355	+	20	NA	promoter-TSS (NM_001354189)	promoter-TSS (NM_001354189)	-27	NM_001363603	636		NM_001714	ENSG00000151746	BICD1	BICD|bic-D 1	BICD cargo adaptor 1	protein-coding
7985-2	chr10	49831377	49832382	+	20	NA	intron (NR_136754, intron 16 of 17)	MER21C|LTR|ERVL	-69500	NM_001347820	55753		NM_018245	ENSG00000197444	OGDHL	YOBELN	oxoglutarate dehydrogenase L	protein-coding
12355	chr14	61280430	61281824	+	20	NA	exon (NM_001017970, exon 1 of 1)	exon (NM_001017970, exon 1 of 1)	211	NM_001017970	161291		NM_001017970	ENSG00000182107	TMEM30B	CDC50B	transmembrane protein 30B	protein-coding
9505-2	chr5	38638979	38640114	+	20	NA	intron (NR_103554, intron 2 of 8)	intron (NR_103554, intron 2 of 8)	-44141	NM_002310	3977		NM_002310	ENSG00000113594	LIFR	CD118|LIF-R|SJS2|STWS|SWS	LIF receptor subunit alpha	protein-coding
9374-2	chr4	94641406	94642929	+	20	NA	intron (NM_006457, intron 9 of 12)	intron (NM_006457, intron 9 of 12)	115366	NR_121610	100507012		NR_121610	ENSG00000249599	BMPR1B-DT	BMPR1B-AS1	BMPR1B divergent transcript	ncRNA
11104	chr22	40713982	40715043	+	20	NA	Intergenic	Intergenic	35028	NM_005297	2847		NM_005297	ENSG00000128285	MCHR1	GPR24|MCH-1R|MCH1R|SLC-1|SLC1	melanin concentrating hormone receptor 1	protein-coding
12296	chr1	208149445	208150352	+	20	NA	intron (NM_025179, intron 3 of 31)	intron (NM_025179, intron 3 of 31)	94486	NM_025179	5362		NM_025179	ENSG00000076356	PLXNA2	OCT|PLXN2	plexin A2	protein-coding
11725-2	chr15	89165419	89165513	+	20	NA	intron (NM_152924, intron 5 of 10)	intron (NM_152924, intron 5 of 10)	56113	NM_000326	6017		NM_000326	ENSG00000140522	RLBP1	CRALBP	retinaldehyde binding protein 1	protein-coding
7661	chr10	36641347	36642206	+	20	NA	Intergenic	Intergenic	-484081	NM_052997	91074		NM_052997	ENSG00000148513	ANKRD30A	NY-BR-1	ankyrin repeat domain 30A	protein-coding
35484	chr11	64083861	64085964	+	20	NA	intron (NM_001384466, intron 1 of 2)	intron (NM_001384466, intron 1 of 2)	48230	NM_001384466	23769		NM_013280	ENSG00000126500	FLRT1	SPG68	fibronectin leucine rich transmembrane protein 1	protein-coding
8391-3	chr2	164612968	164614185	+	20	NA	intron (NM_004490, intron 2 of 13)	intron (NM_004490, intron 2 of 13)	7906	NM_004490	2888		NM_004490	ENSG00000115290	GRB14	-	growth factor receptor bound protein 14	protein-coding
7746-3	chr17	59399558	59400259	+	20	NA	3' UTR (NM_001005404, exon 5 of 5)	3' UTR (NM_001005404, exon 5 of 5)	33825	NR_039882	100616204		NR_039882	ENSG00000263857	MIR4729	-	microRNA 4729	ncRNA
15266	chr16	29995207	29996643	+	20	NA	promoter-TSS (NR_134855)	promoter-TSS (NR_134855)	171	NM_001197323	8479		NM_003609	ENSG00000149929	HIRIP3	-	HIRA interacting protein 3	protein-coding
11623	chr2	6076745	6078685	+	20	NA	Intergenic	Intergenic	95737	NR_026833	400940		NM_207479		LOC400940	-	uncharacterized LOC400940	ncRNA
10668	chr9	68636466	68637936	+	20	NA	Intergenic	Intergenic	-68039	NM_003558	8395		NM_003558	ENSG00000107242	PIP5K1B	MSS4|STM7	phosphatidylinositol-4-phosphate 5-kinase type 1 beta	protein-coding
18741	chr16	30548120	30549947	+	20	NA	Intergenic	Intergenic	9341	NM_033410	92595		NM_033410	ENSG00000169951	ZNF764	-	zinc finger protein 764	protein-coding
31585	chr21	8249043	8252177	+	20	NA	intron (NR_003287, intron 1 of 2)	CpG	1105	NR_128715	103504727		NR_128715	ENSG00000274060	MIR6724-2	hsa-mir-6724-2	microRNA 6724-2	ncRNA
54161	chr2	119437775	119439315	+	20	NA	TTS (NM_183240)	TTS (NM_183240)	6691	NM_183240	140738		NM_183240	ENSG00000171227	TMEM37	PR|PR1	transmembrane protein 37	protein-coding
12341-2	chr5	129094216	129095608	+	20	NA	exon (NM_016048, exon 1 of 5)	exon (NM_016048, exon 1 of 5)	163	NM_016048	51015		NM_016048	ENSG00000066583	ISOC1	CGI-111	isochorismatase domain containing 1	protein-coding
11297	chr2	197943591	197945849	+	20	NA	intron (NM_006226, intron 1 of 5)	intron (NM_006226, intron 1 of 5)	140127	NM_006226	5334		NM_006226	ENSG00000115896	PLCL1	PLCE|PLCL|PLDL1|PPP1R127|PRIP	phospholipase C like 1 (inactive)	protein-coding
8681-2	chr3	63046822	63048160	+	20	NA	Intergenic	LTR53|LTR|ERVL	-55197	NR_027104	285401		NR_027104	ENSG00000244342	LINC00698	-	long intergenic non-protein coding RNA 698	ncRNA
29323	chr3	149368253	149372049	+	20	NA	intron (NM_014220, intron 4 of 4)	intron (NM_014220, intron 4 of 4)	7498	NM_014220	4071		NM_014220	ENSG00000169908	TM4SF1	H-L6|L6|M3S1|TAAL6	transmembrane 4 L six family member 1	protein-coding
8297	chr11	46119268	46119915	+	20	NA	intron (NM_001352028, intron 1 of 18)	intron (NM_001352028, intron 1 of 18)	1228	NM_001352029	51317		NM_016621	ENSG00000135365	PHF21A	BHC80|BM-006|IDDBCS|NEDMS	PHD finger protein 21A	protein-coding
25898	chr1	146036980	146039658	+	20	NA	Intergenic	AluJb|SINE|Alu	13925	NR_104085	101954276		NR_104085	ENSG00000201558	RNVU1-6	RNU1-99|vU1.6	RNA, variant U1 small nuclear 6	snRNA
20635	chr6	24980398	24981936	+	20	NA	intron (NM_001286446, intron 1 of 13)	intron (NM_001286446, intron 1 of 13)	-45207	NM_001286445	9750		NM_014722	ENSG00000111913	RIPOR2	C6orf32|DFNA21|DFNB104|DIFF40|DIFF48|FAM65B|MYONAP|PL48	RHO family interacting cell polarization regulator 2	protein-coding
10516	chr7	76548835	76550054	+	20	NA	non-coding (NR_029411, exon 1 of 3)	non-coding (NR_029411, exon 1 of 3)	103	NR_029411	100133091		NR_029411	ENSG00000290873	LINC03009	-	long intergenic non-protein coding RNA 3009	ncRNA
12661	chr2	67046414	67048211	+	20	NA	Intergenic	Intergenic	-39134	NR_110564	102800447		NR_110564		LINC01828	-	long intergenic non-protein coding RNA 1828	ncRNA
9226	chrX	57286509	57287527	+	20	NA	intron (NM_174912, intron 1 of 10)	intron (NM_174912, intron 1 of 10)	164	NR_148564	158584		NM_174912	ENSG00000165591	FAAH2	AMDD	fatty acid amide hydrolase 2	protein-coding
14776	chr2	221267970	221270052	+	20	NA	Intergenic	Intergenic	303293	NM_001304537	2043		NM_004438	ENSG00000116106	EPHA4	EK8|HEK8|SEK|TYRO1	EPH receptor A4	protein-coding
9431	chr12	75985635	75986814	+	20	NA	Intergenic	MER5B|DNA|hAT-Charlie	45552	NM_007350	22822		NM_007350	ENSG00000139289	PHLDA1	DT1P1B11|PHRIP|TDAG51	pleckstrin homology like domain family A member 1	protein-coding
18065	chr1	201500237	201501956	+	20	NA	intron (NM_004078, intron 1 of 5)	MIRb|SINE|MIR	-4523	NM_001193572	1465		NM_004078	ENSG00000159176	CSRP1	CRP|CRP1|CSRP|CYRP|D1S181E|HEL-141|HEL-S-286	cysteine and glycine rich protein 1	protein-coding
8016-2	chr3	173395145	173396203	+	20	NA	promoter-TSS (NM_001365930)	promoter-TSS (NM_001365930)	-278	NM_001365936	22871		NM_014932	ENSG00000169760	NLGN1	NL1|NLG1	neuroligin 1	protein-coding
5863	chr11	111988647	111989440	+	20	NA	exon (NM_001037954, exon 10 of 20)	exon (NM_001037954, exon 10 of 20)	11734	NM_033425	85458		NM_033425	ENSG00000150764	DIXDC1	CCD1	DIX domain containing 1	protein-coding
7811-3	chrX	63560567	63561220	+	20	NA	non-coding (NR_015353, exon 1 of 4)	non-coding (NR_015353, exon 1 of 4)	202	NR_152610	92249		NR_015353	ENSG00000235437	LINC01278	-	long intergenic non-protein coding RNA 1278	ncRNA
11265	chr10	26314166	26315179	+	20	NA	Intergenic	Intergenic	97898	NM_001134366	2572		NM_000818	ENSG00000136750	GAD2	GAD65	glutamate decarboxylase 2	protein-coding
7712-2	chr2	170118883	170119984	+	20	NA	Intergenic	LTR22C0|LTR|ERVK	-58714	NR_045684	140469		NM_138995	ENSG00000071909	MYO3B	-	myosin IIIB	protein-coding
9475	chr21	16194049	16195238	+	20	NA	intron (NR_136543, intron 1 of 4)	intron (NR_136543, intron 1 of 4)	264	NR_027791	388815		NR_027790	ENSG00000215386	MIR99AHG	C21orf34|C21orf35|DILA1|LINC00478|MONC	mir-99a-let-7c cluster host gene	ncRNA
8485	chr9	131472955	131474208	+	20	NA	exon (NM_001384822, exon 15 of 31)	exon (NM_001384822, exon 15 of 31)	-12084	NR_003050	692093		NR_003050	ENSG00000231587	SNORD62B	U62|U62B	small nucleolar RNA, C/D box 62B	snoRNA
10661	chr1	116170895	116172000	+	20	NA	Intergenic	MLT1H1|LTR|ERVL-MaLR	59692	NM_152367	126868		NM_152367	ENSG00000173212	MAB21L3	C1orf161|D5	mab-21 like 3	protein-coding
8094	chr2	89839223	89840804	+	20	NA	Intergenic	(TGGAA)n|Simple_repeat|Simple_repeat	-202106	NR_136329	101927050		NR_136329		KMT2CP4	-	lysine methyltransferase 2C pseudogene 4	pseudo
13576	chrX	86012737	86014613	+	20	NA	intron (NM_001320959, intron 2 of 14)	AluSc|SINE|Alu	33631	NM_001362518	1121		NM_000390	ENSG00000188419	CHM	DXS540|GGTA|HSD-32|REP-1|TCD	CHM Rab escort protein	protein-coding
14958	chr18	2000981	2003264	+	20	NA	Intergenic	L1ME3|LINE|L1	569383	NM_022840	64863		NM_022840	ENSG00000101574	METTL4	HsT661	methyltransferase 4, N6-adenosine	protein-coding
13740	chr11	44243274	44244399	+	20	NA	intron (NM_000401, intron 13 of 13)	L3|LINE|CR1	66303	NM_021926	60529		NM_021926	ENSG00000052850	ALX4	CRS5|FND2	ALX homeobox 4	protein-coding
6975	chr15	64111566	64112401	+	20	NA	intron (NM_001242933, intron 1 of 14)	intron (NM_001242933, intron 1 of 14)	16001	NM_001242933	6642		NM_003099	ENSG00000028528	SNX1	HsT17379|VPS5	sorting nexin 1	protein-coding
6719	chr9	36867666	36868443	+	20	NA	intron (NM_001280549, intron 6 of 7)	intron (NM_001280549, intron 6 of 7)	-3746	NR_039766	100616278		NR_039766	ENSG00000264922	MIR4540	-	microRNA 4540	ncRNA
7824-2	chr15	35478845	35479915	+	20	NA	intron (NM_080650, intron 3 of 8)	intron (NM_080650, intron 3 of 8)	66785	NM_080650	89978		NM_080650	ENSG00000134146	DPH6	ATPBD4	diphthamine biosynthesis 6	protein-coding
9792	chr8	6900487	6901796	+	20	NA	Intergenic	Intergenic	-23205	NM_005218	1672		NM_005218	ENSG00000164825	DEFB1	BD1|DEFB-1|DEFB101|HBD1	defensin beta 1	protein-coding
8806	chr19	19366541	19367110	+	20	NA	Intergenic	Intergenic	-19018	NM_001300946	54815		NM_017660	ENSG00000167491	GATAD2A	p66alpha	GATA zinc finger domain containing 2A	protein-coding
9277	chr12	54158891	54160398	+	20	NA	Intergenic	Intergenic	29313	NM_001351257	23583		NM_014311	ENSG00000123415	SMUG1	FDG|HMUDG|UNG3	single-strand-selective monofunctional uracil-DNA glycosylase 1	protein-coding
9779-4	chr7	141000811	141002043	+	20	NA	Intergenic	Intergenic	13252	NM_016071	51650		NM_016071	ENSG00000090263	MRPS33	CGI-139|MRP-S33|PTD003|S33mt|mS33	mitochondrial ribosomal protein S33	protein-coding
8751	chr1	53249498	53250398	+	20	NA	intron (NM_033300, intron 15 of 16)	L2c|LINE|L2	11338	NR_038953	100507564		NR_038953	ENSG00000226754	MAGOH-DT	-	MAGOH divergent transcript	ncRNA
24361	chr8	67342054	67343895	+	20	NA	promoter-TSS (NR_136223)	promoter-TSS (NR_136223)	807	NM_006421	10565		NM_006421	ENSG00000066777	ARFGEF1	ARFGEP1|BIG1|DEDISB|P200	ADP ribosylation factor guanine nucleotide exchange factor 1	protein-coding
10702	chr11	64803303	64804236	+	20	NA	promoter-TSS (NM_001307990)	promoter-TSS (NM_001307990)	-555	NM_004579	5871		NM_004579	ENSG00000168067	MAP4K2	BL44|GCK|RAB8IP	mitogen-activated protein kinase kinase kinase kinase 2	protein-coding
6553	chr12	13101253	13102030	+	20	NA	TTS (NR_159953)	TTS (NR_159953)	2026	NM_001367362	83445		NM_031289	ENSG00000111305	GSG1	-	germ cell associated 1	protein-coding
18491	chr8	26448505	26450596	+	20	NA	Intergenic	CpG	59137	NM_001330491	665		NM_004331	ENSG00000104765	BNIP3L	BNIP3a|NIP3L|NIX	BCL2 interacting protein 3 like	protein-coding
8470-3	chr4	73533537	73534447	+	20	NA	Intergenic	Intergenic	25189	NR_046377	728040		NR_046377	ENSG00000250436	LINC02499	-	long intergenic non-protein coding RNA 2499	ncRNA
12753	chrUn_GL000216v2	146680	148608	+	20	NA	NA	BSR/Beta|Satellite|Satellite	NA	NA
29708	chr2	200307183	200309645	+	20	NA	promoter-TSS (NM_001282744)	promoter-TSS (NM_001282744)	-536	NM_001282744	26010		NM_015535	ENSG00000196141	SPATS2L	DNAPTP6|SGNP	spermatogenesis associated serine rich 2 like	protein-coding
26894	chr8	8849107	8852472	+	20	NA	intron (NM_004225, intron 1 of 2)	AluSq|SINE|Alu	42841	NM_004225	9258		NM_004225	ENSG00000147324	MFHAS1	LRRC65|MASL1|ROCO4	multifunctional ROCO family signaling regulator 1	protein-coding
8453-2	chr17_KI270861v1_alt	58077	59173	+	20	NA	promoter-TSS (NM_001284498)	promoter-TSS (NM_001284498)	-181	NM_001321365	124935		NM_152346	ENSG00000167703	SLC43A2	LAT4	solute carrier family 43 member 2	protein-coding
9217	chr1	36323723	36324635	+	20	NA	promoter-TSS (NM_001304762)	promoter-TSS (NM_001304762)	-25	NM_018166	55194		NM_018166	ENSG00000142694	EVA1B	C1orf78|FAM176B	eva-1 homolog B	protein-coding
6754	chr1	109041667	109042210	+	20	NA	5' UTR (NM_001142551, exon 1 of 15)	5' UTR (NM_001142551, exon 1 of 15)	164	NM_001142551	22911		NM_014969	ENSG00000085433	WDR47	-	WD repeat domain 47	protein-coding
14426	chr11	86999410	87000687	+	20	NA	non-coding (NR_038905, exon 3 of 3)	non-coding (NR_038905, exon 3 of 3)	-37886	NM_022918	65084		NM_022918	ENSG00000166575	TMEM135	PMP52	transmembrane protein 135	protein-coding
10598	chr5	177455472	177456416	+	20	NA	TTS (NM_080881)	TTS (NM_080881)	6482	NM_001364152	1627		NM_004395	ENSG00000113758	DBN1	D0S117E	drebrin 1	protein-coding
12745	chr1	99645392	99646643	+	20	NA	promoter-TSS (NM_017734)	promoter-TSS (NM_017734)	-96	NM_017734	54873		NM_017734	ENSG00000099260	PALMD	C1orf11|PALML	palmdelphin	protein-coding
15565	chr14	74018408	74019981	+	20	NA	promoter-TSS (NM_025057)	promoter-TSS (NM_025057)	94	NM_001321987	957		NM_001249	ENSG00000187097	ENTPD5	CD39L4|NTPDase-5|PCPH	ectonucleoside triphosphate diphosphohydrolase 5 (inactive)	protein-coding
28572	chr19	1274901	1275544	+	20	NA	promoter-TSS (NM_017914)	promoter-TSS (NM_017914)	-308	NM_017914	55009		NM_017914	ENSG00000228300	FAM174C	C19orf24	family with sequence similarity 174 member C	protein-coding
8874-2	chr6	34756652	34757790	+	20	NA	promoter-TSS (NM_003093)	promoter-TSS (NM_003093)	127	NR_029472	6631		NM_003093	ENSG00000124562	SNRPC	U1C|Yhc1	small nuclear ribonucleoprotein polypeptide C	protein-coding
8760-2	chr7	25025136	25025817	+	20	NA	Intergenic	Intergenic	-45298	NM_015550	26031		NM_015550	ENSG00000070882	OSBPL3	ORP-3|ORP3|OSBP3	oxysterol binding protein like 3	protein-coding
8216	chr11	66545861	66546970	+	20	NA	promoter-TSS (NM_001258371)	promoter-TSS (NM_001258371)	20	NM_001258371	89		NM_001104	ENSG00000248746	ACTN3	ACTN3D	actinin alpha 3	protein-coding
12224	chr18	47109714	47111731	+	20	NA	intron (NM_032124, intron 6 of 6)	intron (NM_032124, intron 6 of 6)	39778	NM_032124	84064		NM_032124	ENSG00000167220	HDHD2	3110052N05Rik|HEL-S-301	haloacid dehalogenase like hydrolase domain containing 2	protein-coding
11349	chr17	68019700	68021007	+	20	NA	Intergenic	MER5B|DNA|hAT-Charlie	-15382	NM_002266	3838		NM_002266	ENSG00000182481	KPNA2	IPOA1|PTAC58|QIP2|RCH1|SRP1-alpha|SRP1alpha	karyopherin subunit alpha 2	protein-coding
6363-2	chr2	86704321	86705202	+	20	NA	intron (NM_001198954, intron 1 of 7)	MLT1F2|LTR|ERVL-MaLR	-15530	NM_022780	64795		NM_022780	ENSG00000153561	RMND5A	CTLH|GID2|GID2A|RMD5|p44CTLH	required for meiotic nuclear division 5 homolog A	protein-coding
13894	chr7	129824635	129826253	+	20	NA	Intergenic	Intergenic	-50430	NR_029615	406959		NR_029615	ENSG00000207691	MIR183	MIRN183|miR-183|miRNA183	microRNA 183	ncRNA
10603	chr12	101051619	101052462	+	20	NA	intron (NM_001286615, intron 14 of 27)	intron (NM_001286615, intron 14 of 27)	-86518	NR_049838	100847078		NR_049838	ENSG00000265470	MIR548AQ	-	microRNA 548aq	ncRNA
9024	chr2	172555828	172556794	+	20	NA	exon (NM_002610, exon 1 of 11)	exon (NM_002610, exon 1 of 11)	221	NM_001278549	5163		NM_002610	ENSG00000152256	PDK1	-	pyruvate dehydrogenase kinase 1	protein-coding
8712	chr14	45135801	45136283	+	20	NA	exon (NM_001308134, exon 1 of 11)	exon (NM_001308134, exon 1 of 11)	103	NM_001308134	57697		NM_020937	ENSG00000187790	FANCM	FAAP250|KIAA1596|POF15|SPGF28	FA complementation group M	protein-coding
7792	chr3	100089760	100091016	+	20	NA	intron (NM_182909, intron 1 of 5)	intron (NM_182909, intron 1 of 5)	24125	NM_182909	11259		NM_014890	ENSG00000168386	FILIP1L	DOC-1|DOC1|GIP130|GIP90	filamin A interacting protein 1 like	protein-coding
8804	chr12	11768183	11769221	+	20	NA	intron (NM_001987, intron 2 of 7)	intron (NM_001987, intron 2 of 7)	119028	NM_001987	2120		NM_001987	ENSG00000139083	ETV6	TEL|TEL/ABL|THC5	ETS variant transcription factor 6	protein-coding
6606	chr10	103676178	103676819	+	20	NA	intron (NM_014631, intron 6 of 13)	intron (NM_014631, intron 6 of 13)	1717	NM_001365079	9644		NM_014631	ENSG00000107957	SH3PXD2A	FISH|SH3MD1|TKS5	SH3 and PX domains 2A	protein-coding
16653	chr13	52002839	52005125	+	20	NA	intron (NM_001330579, intron 1 of 18)	AluSx|SINE|Alu	7468	NM_000053	540		NM_000053	ENSG00000123191	ATP7B	PWD|WC1|WD|WND	ATPase copper transporting beta	protein-coding
16097	chr8	143367960	143368894	+	20	NA	promoter-TSS (NM_052924)	promoter-TSS (NM_052924)	208	NR_026785	78998		NM_024035	ENSG00000254389	RHPN1-AS1	C8orf51	RHPN1 antisense RNA 1 (head to head)	ncRNA
13035	chr16	2523375	2525185	+	20	NA	intron (NM_001330449, intron 3 of 10)	intron (NM_001330449, intron 3 of 10)	3909	NM_001330449	51005		NM_015944	ENSG00000162066	AMDHD2	CGI-14	amidohydrolase domain containing 2	protein-coding
14773	chr4	49122267	49123925	+	20	NA	Intergenic	(TCCAT)n|Simple_repeat|Simple_repeat	136454	NM_001286791	80157		NM_025087	ENSG00000109182	CWH43	CWH43-C|PGAP2IP	cell wall biogenesis 43 C-terminal homolog	protein-coding
20604	chr17	28407226	28408587	+	20	NA	Intergenic	Intergenic	-1694	NM_080669	113235		NM_080669	ENSG00000076351	SLC46A1	G21|HCP1|HsPCFT|PCFT|hPCFT	solute carrier family 46 member 1	protein-coding
11604	chrX	123648253	123649444	+	20	NA	intron (NM_001081550, intron 12 of 38)	L1PA7|LINE|L1	84204	NM_001081550	57187		NM_020449	ENSG00000125676	THOC2	CXorf3|MRX12|MRX35|THO2|XLID12|dJ506G2.1|hTREX120	THO complex subunit 2	protein-coding
9541-2	chr18	9673024	9673927	+	20	NA	Intergenic	Intergenic	-34826	NM_006868	11031		NM_006868	ENSG00000168461	RAB31	Rab22B	RAB31, member RAS oncogene family	protein-coding
8371	chr13	91346950	91347768	+	20	NA	promoter-TSS (NR_027349)	promoter-TSS (NR_027349)	-461	NR_027350	407975		NM_213723	ENSG00000215417	MIR17HG	C13orf25|FGLDS2|LINC00048|MIHG1|MIRH1|MIRHG1|NCRNA00048|miR-17-92	miR-17-92a-1 cluster host gene	ncRNA
6394	chr14_GL000225v1_random	122733	123610	+	20	NA	NA	BSR/Beta|Satellite|Satellite	NA	NA
9364	chr17	2776753	2777703	+	20	NA	intron (NM_001330058, intron 1 of 24)	intron (NM_001330058, intron 1 of 24)	470	NM_001330058	23108		NM_015085	ENSG00000132359	RAP1GAP2	GARNL4|RAP1GA3	RAP1 GTPase activating protein 2	protein-coding
7326-2	chr6	99393526	99394270	+	20	NA	intron (NM_017421, intron 1 of 6)	CpG	297	NM_017421	51805		NM_017421	ENSG00000132423	COQ3	DHHBMT|DHHBMTASE|UG0215E05|bA9819.1	coenzyme Q3, methyltransferase	protein-coding
16036-2	chr4	140252391	140253790	+	20	NA	Intergenic	CpG	-4218	NM_032547	60592		NM_032547	ENSG00000153130	SCOC	HRIHFB2072|SCOCO|UNC-69	short coiled-coil protein	protein-coding
6845	chr6	155126676	155127573	+	20	NA	intron (NM_001384547, intron 1 of 25)	intron (NM_001384547, intron 1 of 25)	20137	NM_001384547	26230		NM_012454	ENSG00000146426	TIAM2	STEF|TIAM-2	TIAM Rac1 associated GEF 2	protein-coding
19744	chr7	101869316	101871432	+	20	NA	intron (NM_181552, intron 1 of 23)	AluJr|SINE|Alu	52748	NM_181552	1523		NM_001913	ENSG00000257923	CUX1	CASP|CDP|CDP/Cut|CDP1|COY1|CUTL1|CUX|Clox|Cux/CDP|GDDI|GOLIM6|Nbla10317|p100|p110|p200|p75	cut like homeobox 1	protein-coding
5835	chr8	17576132	17576995	+	20	NA	promoter-TSS (NM_001372073)	promoter-TSS (NM_001372073)	130	NM_006207	5157		NM_006207	ENSG00000104213	PDGFRL	PDGRL|PRLTS	platelet derived growth factor receptor like	protein-coding
8533-2	chrUn_GL000216v2	5177	6191	+	20	NA	NA	(CATTC)n|Satellite|Satellite	NA	NA
7686	chr10	102431601	102432796	+	20	NA	intron (NM_024040, intron 1 of 8)	intron (NM_024040, intron 1 of 8)	376	NM_024040	79004		NM_024040	ENSG00000107874	CUEDC2	C10orf66|bA18I14.5	CUE domain containing 2	protein-coding
10960	chr1	37808113	37808922	+	20	NA	promoter-TSS (NM_024640)	promoter-TSS (NM_024640)	-309	NM_024640	79693		NM_024640	ENSG00000196449	YRDC	DRIP3|GAMOS10|IRIP|SUA5	yrdC N6-threonylcarbamoyltransferase domain containing	protein-coding
8049	chr4	142338787	142339834	+	20	NA	intron (NM_001385334, intron 6 of 24)	intron (NM_001385334, intron 6 of 24)	-33366	NM_001385459	8821		NM_003866	ENSG00000109452	INPP4B	-	inositol polyphosphate-4-phosphatase type II B	protein-coding
28576	chr19	2044201	2044800	+	20	NA	intron (NM_199054, intron 5 of 13)	intron (NM_199054, intron 5 of 13)	6744	NM_199054	2872		NM_017572	ENSG00000099875	MKNK2	GPRK7|MNK2	MAPK interacting serine/threonine kinase 2	protein-coding
7708	chr1	186762795	186763712	+	20	NA	Intergenic	Intergenic	-65696	NM_024420	5321		NM_024420	ENSG00000116711	PLA2G4A	GURDP|PLA2G4|cPLA2|cPLA2-alpha	phospholipase A2 group IVA	protein-coding
16299	chr15	85024110	85026745	+	20	NA	intron (NM_173454, intron 1 of 20)	intron (NM_173454, intron 1 of 20)	43453	NM_173454	5151		NM_002605	ENSG00000073417	PDE8A	HsT19550	phosphodiesterase 8A	protein-coding
11479	chr14	67513314	67514879	+	20	NA	intron (NM_001348549, intron 1 of 3)	intron (NM_001348549, intron 1 of 3)	1119	NM_001348544	161145		NM_182526	ENSG00000198133	TMEM229B	C14orf83	transmembrane protein 229B	protein-coding
10293	chr2	55838622	55839894	+	20	NA	Intergenic	Intergenic	84524	NM_001039348	2202		NM_004105	ENSG00000115380	EFEMP1	ARCL1D|DHRD|DRAD|FBLN3|FBNL|FIBL-3|GLC1H|MLVT|MTLV|S1-5	EGF containing fibulin extracellular matrix protein 1	protein-coding
11207	chr9	16099674	16101408	+	20	NA	Intergenic	Intergenic	175772	NM_001364979	100129385		NM_001271829	ENSG00000205549	LINC03041	C9orf92|Em:AL513424.1	long intergenic non-protein coding RNA 3041	ncRNA
9779-2	chr10	58334881	58335687	+	20	NA	intron (NM_003338, intron 1 of 6)	CpG	278	NM_003338	7321		NM_003338	ENSG00000072401	UBE2D1	E2(17)KB1|SFT|UBC4/5|UBCH5|UBCH5A	ubiquitin conjugating enzyme E2 D1	protein-coding
9650	chr3	75641119	75642061	+	20	NA	Intergenic	Intergenic	10827	NR_031714	100302212		NR_031714	ENSG00000283894	MIR1324	MIRN1324|hsa-mir-1324	microRNA 1324	ncRNA
12260	chr8	126531538	126532992	+	20	NA	Intergenic	L2|LINE|L2	26213	NM_174911	157638		NM_174911	ENSG00000168672	LRATD2	BCMP101|FAM84B|NSE2	LRAT domain containing 2	protein-coding
11070	chr10	33198022	33199340	+	20	NA	intron (NM_001024629, intron 10 of 10)	intron (NM_001024629, intron 10 of 10)	-81874	NR_160030	101929447		NR_160030		IATPR	TCONS_00018476|linc-ITGB1	ITGB1 adjacent tumor promoting lncRNA	ncRNA
12783	chr19	39514607	39515837	+	20	NA	promoter-TSS (NR_146916)	promoter-TSS (NR_146916)	109	NM_182704	348303		NM_182704	ENSG00000186838	SELENOV	SELV	selenoprotein V	protein-coding
19183-2	chr6	25328961	25328963	+	20	NA	intron (NM_001173977, intron 2 of 36)	intron (NM_001173977, intron 2 of 36)	49588	NM_001173977	55604		NM_017640	ENSG00000079691	CARMIL1	CARMIL|CARMIL1a|LRRC16|LRRC16A|dJ501N12.1|dJ501N12.5	capping protein regulator and myosin 1 linker 1	protein-coding
11103	chr17	21099035	21099919	+	20	NA	Intergenic	Intergenic	23921	NR_110896	101060544		NR_110895	ENSG00000236819	LINC01563	HP08942	long intergenic non-protein coding RNA 1563	ncRNA
8478	chr12	103852125	103853456	+	20	NA	intron (NR_027249, intron 14 of 15)	intron (NR_027249, intron 14 of 15)	-11556	NM_001031701	51559		NM_016575	ENSG00000111696	NT5DC3	TU12B1-TY|TU12B1TY	5'-nucleotidase domain containing 3	protein-coding
18450	chr1	167926140	167928694	+	20	NA	intron (NM_001143674, intron 2 of 5)	intron (NM_001143674, intron 2 of 5)	8579	NR_026550	25874		NM_015415	ENSG00000143158	MPC2	BRP44|SLC54A2	mitochondrial pyruvate carrier 2	protein-coding
12707	chr19	47242698	47243668	+	20	NA	Intergenic	Intergenic	-10516	NM_001127241	27113		NM_014417	ENSG00000105327	BBC3	JFY-1|JFY1|PUMA	BCL2 binding component 3	protein-coding
8314	chr10	119872739	119873888	+	20	NA	promoter-TSS (NM_001256378)	promoter-TSS (NM_001256378)	315	NM_001256379	79892		NM_024834	ENSG00000197771	MCMBP	C10orf119|MCM-BP	minichromosome maintenance complex binding protein	protein-coding
22564	chr14	55274808	55276703	+	20	NA	intron (NM_152231, intron 1 of 1)	AluY|SINE|Alu	3601	NM_152231	55030		NM_017943	ENSG00000178974	FBXO34	CGI-301|Fbx34	F-box protein 34	protein-coding
10689	chr16_KI270853v1_alt	202242	203606	+	20	NA	intron (NM_001134477, intron 1 of 23)	CpG	192	NM_001242992	5073		NM_002582	ENSG00000140694	PARN	DAN|DKCB6|PFBMFT4	poly(A)-specific ribonuclease	protein-coding
15132	chr10	5146685	5148568	+	20	NA	Intergenic	MST-int|LTR|ERVL-MaLR	37561	NR_027916	340811		NM_001007536	ENSG00000264006	AKR1C8	AKR1C8P|AKR1CL1	aldo-keto reductase family 1 member C8	protein-coding
9531-2	chr5	74865016	74866016	+	20	NA	promoter-TSS (NR_134288)	promoter-TSS (NR_134288)	-377	NR_134288	441086		NR_134288		FAM169A-AS1	TP53LC02	FAM169A antisense RNA 1	ncRNA
8897-3	chr3	155704524	155705498	+	20	NA	intron (NM_001349251, intron 1 of 22)	intron (NM_001349251, intron 1 of 22)	-28668	NM_001130961	23007		NM_014996	ENSG00000114805	PLCH1	HPE14|PLC eta 1|PLC-L3|PLCL3	phospholipase C eta 1	protein-coding
6712	chr12	1593374	1594142	+	20	NA	exon (NM_152441, exon 1 of 2)	exon (NM_152441, exon 1 of 2)	823	NM_152441	144699		NM_152441	ENSG00000171823	FBXL14	Fbl14	F-box and leucine rich repeat protein 14	protein-coding
18959	chr5	150136268	150139614	+	20	NA	intron (NM_001355017, intron 1 of 22)	(AGACAG)n|Simple_repeat|Simple_repeat	17904	NM_001355016	5159		NM_002609	ENSG00000113721	PDGFRB	CD140B|IBGC4|IMF1|JTK12|KOGS|PDGFR|PDGFR-1|PDGFR1|PENTT	platelet derived growth factor receptor beta	protein-coding
12084	chr5	179796165	179797165	+	20	NA	TTS (NM_145867)	TTS (NM_145867)	1681	NR_031598	100302156		NR_031598	ENSG00000221394	MIR1229	MIRN1229|hsa-mir-1229	microRNA 1229	ncRNA
8718	chr6	28104519	28105568	+	20	NA	Intergenic	CpG	14236	NR_024063	221584		NR_024063		ZSCAN12P1	ZNF187p1|ZNF305P1|ZNF96L1|ZNF96P1|ZSCAN12L1|dJ313I6.7	zinc finger and SCAN domain containing 12 pseudogene 1	pseudo
8221	chr3	98669548	98670737	+	20	NA	Intergenic	MIRb|SINE|MIR	-62094	NM_001323353	10402		NM_006100	ENSG00000064225	ST3GAL6	SIAT10|ST3GALVI	ST3 beta-galactoside alpha-2,3-sialyltransferase 6	protein-coding
15584	chr11	129865382	129867145	+	20	NA	intron (NM_001143835, intron 24 of 26)	intron (NM_001143835, intron 24 of 26)	26746	NM_006165	4798		NM_006165	ENSG00000170322	NFRKB	INO80G	nuclear factor related to kappaB binding protein	protein-coding
7478	chr7	66005090	66005843	+	20	NA	Intergenic	LTR5B|LTR|ERVK	-23253	NR_120531	2990		NM_000181	ENSG00000169919	GUSB	BG|MPS7	glucuronidase beta	protein-coding
15857	chr10	95655479	95657035	+	20	NA	intron (NM_001323419, intron 1 of 14)	CpG	454	NM_001323412	5832		NM_002860	ENSG00000059573	ALDH18A1	ADCL3|ARCL3A|GSAS|P5CS|PYCS|SPG9|SPG9A|SPG9B	aldehyde dehydrogenase 18 family member A1	protein-coding
12016	chr12	47651893	47653411	+	20	NA	Intergenic	MLT1A1|LTR|ERVL-MaLR	53378	NM_024604	79657		NM_024604	ENSG00000005175	RPAP3	Tah1|hSpagh	RNA polymerase II associated protein 3	protein-coding
12992-2	chr9	14865970	14867937	+	20	NA	intron (NR_163240, intron 2 of 7)	AluSz6|SINE|Alu	43475	NR_163240	158326		NM_144966	ENSG00000164946	FREM1	BNAR|C9orf143|C9orf145|C9orf154|MOTA|TILRR|TRIGNO2	FRAS1 related extracellular matrix 1	protein-coding
13076	chr2	60091488	60092888	+	20	NA	Intergenic	Intergenic	290848	NR_132991	106660609		NR_132991	ENSG00000228590	MIR4432HG	-	MIR4432 host gene	ncRNA
6000-3	chr3	105843792	105844417	+	20	NA	intron (NR_135807, intron 3 of 20)	MLT1C|LTR|ERVL-MaLR	23487	NM_001321813	868		NM_004351	ENSG00000114423	CBLB	ADMIO3|Cbl-b|Nbla00127|RNF56	Cbl proto-oncogene B	protein-coding
11681	chr13	76991309	76992872	+	20	NA	promoter-TSS (NM_001366624)	promoter-TSS (NM_001366624)	9	NM_001366624	1203		NM_006493	ENSG00000102805	CLN5	-	CLN5 intracellular trafficking protein	protein-coding
7119	chr17	81977823	81978854	+	20	NA	intron (NR_045351, intron 1 of 14)	AluY|SINE|Alu	709	NM_024083	79058		NM_024083	ENSG00000169696	ASPSCR1	ASPCR1|ASPL|ASPS|RCC17|TUG|UBXD9|UBXN9	ASPSCR1 tether for SLC2A4, UBX domain containing	protein-coding
13944	chr2	216201521	216203635	+	20	NA	intron (NM_021141, intron 19 of 20)	intron (NM_021141, intron 19 of 20)	-14311	NR_037701	150967		NM_001199924	ENSG00000260804	LINC01963	PKI55	long intergenic non-protein coding RNA 1963	ncRNA
13621	chr1	16748918	16749157	+	20	NA	Intergenic	CpG	8521	NR_004430	26871		NR_004430	ENSG00000206652	RNU1-1	HSD1|HU1-1|RNU1|RNU1A|RNU1A3|RNU1G4|Rnu1a1|U1|U1A1	RNA, U1 small nuclear 1	snRNA
10667	chr1	197145965	197147056	+	20	NA	5' UTR (NM_001206846, exon 1 of 27)	5' UTR (NM_001206846, exon 1 of 27)	159	NM_018136	259266		NM_018136	ENSG00000066279	ASPM	ASP|Calmbp1|MCPH5	assembly factor for spindle microtubules	protein-coding
9128	chr11	47509007	47510053	+	20	NA	intron (NM_001376409, intron 1 of 15)	AluJo|SINE|Alu	14301	NM_001172639	10658		NM_006560	ENSG00000149187	CELF1	BRUNOL2|CUG-BP|CUGBP|CUGBP1|EDEN-BP|NAB50|NAPOR|hNab50	CUGBP Elav-like family member 1	protein-coding
7950-2	chr18	22281955	22282832	+	20	NA	Intergenic	Intergenic	112804	NM_005257	2627		NM_005257	ENSG00000141448	GATA6	-	GATA binding protein 6	protein-coding
7219-2	chrX	72554561	72555127	+	20	NA	intron (NM_001166448, intron 2 of 4)	L1PBa|LINE|L1	17999	NM_001166422	55869		NM_018486	ENSG00000147099	HDAC8	CDA07|CDLS5|HD8|HDACL1|KDAC8|MRXS6|RPD3|WTS	histone deacetylase 8	protein-coding
8137-2	chr5	68924448	68925278	+	20	NA	Intergenic	Intergenic	105064	NR_130778	101928885		NR_130778		LINC02198	-	long intergenic non-protein coding RNA 2198	ncRNA
9062	chr2	10057275	10058094	+	20	NA	3' UTR (NM_001037160, exon 3 of 3)	3' UTR (NM_001037160, exon 3 of 3)	13439	NM_001177718	8462		NM_003597	ENSG00000172059	KLF11	FKLF|FKLF1|MODY7|TIEG2|Tieg3	KLF transcription factor 11	protein-coding
15992	chr12	81077490	81078687	+	20	NA	promoter-TSS (NM_024560)	promoter-TSS (NM_024560)	9	NM_024560	79611		NM_024560	ENSG00000111058	ACSS3	-	acyl-CoA synthetase short chain family member 3	protein-coding
8809	chr2	85989712	85990783	+	20	NA	Intergenic	AluSq2|SINE|Alu	100967	NR_110569	101928113		NR_110569		ST3GAL5-AS1	-	ST3GAL5 antisense RNA 1 (head to head)	ncRNA
8368	chr7	31947659	31949015	+	20	NA	intron (NM_001322058, intron 3 of 17)	intron (NM_001322058, intron 3 of 17)	122070	NM_001191057	5137		NM_005020	ENSG00000154678	PDE1C	DFNA74|Hcam3|cam-PDE 1C|hCam-3	phosphodiesterase 1C	protein-coding
9771	chr13	34167268	34168186	+	20	NA	Intergenic	Intergenic	-180316	NR_146542	105370158		NR_146542	ENSG00000271850	LINC02343	-	long intergenic non-protein coding RNA 2343	ncRNA
16200	chr6	35920787	35921476	+	20	NA	promoter-TSS (NM_003137)	promoter-TSS (NM_003137)	-33	NM_003137	6732		NM_003137	ENSG00000096063	SRPK1	SFRSK1	SRSF protein kinase 1	protein-coding
21837	chr19	48628274	48631471	+	20	NA	TTS (NM_001352)	TTS (NM_001352)	4843	NM_001204160	56848		NM_020126	ENSG00000063176	SPHK2	SK 2|SK-2|SPK 2|SPK-2	sphingosine kinase 2	protein-coding
6362	chr19	57527228	57527983	+	20	NA	exon (NM_001199295, exon 1 of 4)	exon (NM_001199295, exon 1 of 4)	249	NM_001199295	256051		NM_153263	ENSG00000121406	ZNF549	-	zinc finger protein 549	protein-coding
44301	chr17	82096938	82098130	+	20	NA	intron (NM_004104, intron 1 of 42)	CpG	702	NM_004104	2194		NM_004104	ENSG00000169710	FASN	FAS|OA-519|SDR27X1	fatty acid synthase	protein-coding
9278	chr10	125895237	125896166	+	20	NA	promoter-TSS (NM_001350939)	promoter-TSS (NM_001350939)	-834	NM_001350939	92565		NM_145235	ENSG00000203780	FANK1	HSD13	fibronectin type III and ankyrin repeat domains 1	protein-coding
16958	chr4	151324289	151326288	+	20	NA	exon (NM_001378122, exon 1 of 20)	exon (NM_001378122, exon 1 of 20)	317	NM_001378121	152503		NM_001009555	ENSG00000109686	SH3D19	EBP|EVE1|Eve-1|Kryn|SH3P19	SH3 domain containing 19	protein-coding
8974	chr14	100213733	100214963	+	20	NA	Intergenic	CpG	-24796	NM_003403	7528		NM_003403	ENSG00000100811	YY1	DELTA|GADEVS|INO80S|NF-E1|UCRBP|YIN-YANG-1	YY1 transcription factor	protein-coding
14243-2	chr5	10724315	10725744	+	20	NA	intron (NM_004394, intron 2 of 3)	intron (NM_004394, intron 2 of 3)	36205	NM_004394	1611		NM_004394	ENSG00000112977	DAP	DAP1	death associated protein	protein-coding
17806	chr11	96012089	96012660	+	20	NA	intron (NM_032427, intron 2 of 4)	intron (NM_032427, intron 2 of 4)	-88267	NM_201281	8898		NM_016156	ENSG00000087053	MTMR2	CMT4B|CMT4B1	myotubularin related protein 2	protein-coding
8455	chr8	52466965	52467704	+	20	NA	Intergenic	Intergenic	-57455	NM_001352876	9705		NM_014682	ENSG00000147488	ST18	NZF-3|NZF3|ZC2H2C3|ZC2HC10|ZNF387	ST18 C2H2C-type zinc finger transcription factor	protein-coding
5834-2	chr8	126388867	126390055	+	20	NA	Intergenic	MER63B|DNA|hAT-Blackjack	63966	NR_125421	101927657		NR_125421	ENSG00000244791	LOC101927657	-	uncharacterized LOC101927657	ncRNA
16181	chr12	95317597	95320133	+	20	NA	Intergenic	Intergenic	8942	NR_037456	100500802		NR_037456	ENSG00000265917	MIR3685	-	microRNA 3685	ncRNA
24472	chr12	49347237	49349740	+	20	NA	intron (NM_001304944, intron 2 of 3)	intron (NM_001304944, intron 2 of 3)	1600	NM_024902	79962		NM_024902	ENSG00000178401	DNAJC22	wus	DnaJ heat shock protein family (Hsp40) member C22	protein-coding
14841	chr4	89110662	89112092	+	20	NA	promoter-TSS (NM_145715)	promoter-TSS (NM_145715)	-156	NM_145715	166815		NM_145715	ENSG00000180346	TIGD2	HEL106	tigger transposable element derived 2	protein-coding
9347	chr12	68975980	68976837	+	20	NA	Intergenic	Intergenic	-13168	NM_001874	1368		NM_001874	ENSG00000135678	CPM	-	carboxypeptidase M	protein-coding
30764	chr20	47909441	47910247	+	20	NA	Intergenic	Intergenic	-73382	NR_109942	101060004		NR_109942		LINC01523	-	long intergenic non-protein coding RNA 1523	ncRNA
7605	chr4	91268510	91269215	+	20	NA	intron (NM_001145065, intron 10 of 10)	LTR7|LTR|ERV1	1008440	NR_125920	101929194		NR_125920		LNCPRESS2	-	lncRNA p53 regulated and ESC associated 2	ncRNA
15615	chr19	36127853	36129028	+	20	NA	Intergenic	Intergenic	-11626	NM_001003962	826		NM_001749	ENSG00000126247	CAPNS1	CALPAIN4|CANP|CANPS|CAPN4|CDPS|CSS1|PPH6	calpain small subunit 1	protein-coding
10348	chr9	37784377	37785352	+	20	NA	exon (NM_001002269, exon 1 of 3)	exon (NM_001002269, exon 1 of 3)	200	NM_016042	51010		NM_016042	ENSG00000107371	EXOSC3	CGI-102|PCH1B|RRP40|Rrp40p|bA3J10.7|hRrp-40|p10	exosome component 3	protein-coding
8389-3	chr17	1087520	1088428	+	20	NA	intron (NM_001322840, intron 4 of 22).2	intron (NM_001322840, intron 4 of 22).2	-8981	NM_001282149	29		NM_001092	ENSG00000159842	ABR	MDB	ABR activator of RhoGEF and GTPase	protein-coding
14477	chr17	74435286	74437261	+	20	NA	intron (NM_018653, intron 1 of 3)	intron (NM_018653, intron 1 of 3)	2576	NM_018653	55890		NM_018653	ENSG00000170412	GPRC5C	RAIG-3|RAIG3	G protein-coupled receptor class C group 5 member C	protein-coding
14905-2	chr5	168158931	168161117	+	20	NA	intron (NM_001080428, intron 9 of 24)	intron (NM_001080428, intron 9 of 24)	-5821	NR_162139	113219458		NR_162139		MIR12125	-	microRNA 12125	ncRNA
11184-2	chr16	10356559	10358346	+	20	NA	Intergenic	LTR25|LTR|ERV1	-28609	NR_045816	80063		NM_024997	ENSG00000166669	ATF7IP2	MCAF2	activating transcription factor 7 interacting protein 2	protein-coding
6002-3	chr4	88162524	88163274	+	20	NA	intron (NM_001257386, intron 1 of 15)	intron (NM_001257386, intron 1 of 15)	-3576	NM_001348989	9429		NM_004827	ENSG00000118777	ABCG2	ABC15|ABCP|BCRP|BCRP1|BMDP|CD338|CDw338|CDw388|EST157481|GOUT1|MRX|MXR|MXR-1|MXR1|UAQTL1	ATP binding cassette subfamily G member 2 (JR blood group)	protein-coding
20586	chr3	186929990	186932625	+	20	NA	intron (NM_173216, intron 1 of 7)	CpG	781	NM_173216	6480		NM_003032	ENSG00000073849	ST6GAL1	CDw75|SIAT1|ST6GalI|ST6N	ST6 beta-galactoside alpha-2,6-sialyltransferase 1	protein-coding
6764	chr1	205284472	205285467	+	20	NA	Intergenic	Intergenic	27772	NM_001331034	9911		NM_014858	ENSG00000133069	TMCC2	HUCEP11	transmembrane and coiled-coil domain family 2	protein-coding
8275-2	chr5	34447168	34448369	+	20	NA	Intergenic	L1PA7|LINE|L1	-203044	NR_146599	114899		NM_030945	ENSG00000082196	C1QTNF3	C1ATNF3|CORCS|CORS|CORS-26|CORS26|CTRP3	C1q and TNF related 3	protein-coding
12409	chr4	110614979	110616788	+	20	NA	promoter-TSS (NR_147203)	promoter-TSS (NR_147203)	-425	NR_147203	110231149		NR_147203	ENSG00000250103	PANCR	-	PITX2 adjacent non-coding RNA	ncRNA
13326	chr3	73570412	73571972	+	20	NA	intron (NM_015009, intron 3 of 9)	intron (NM_015009, intron 3 of 9)	-1677	NM_001303139	23024		NM_015009	ENSG00000121440	PDZRN3	LNX3|SEMACAP3|SEMCAP3	PDZ domain containing ring finger 3	protein-coding
17910	chr16	667261	668485	+	20	NA	promoter-TSS (NM_001352281)	promoter-TSS (NM_001352281)	-210	NM_001352287	89941		NM_138769	ENSG00000140983	RHOT2	ARHT2|C16orf39|MIRO-2|MIRO2|RASL	ras homolog family member T2	protein-coding
54161-2	chr2	119440451	119442363	+	20	NA	intron (NM_002980, intron 12 of 12)	intron (NM_002980, intron 12 of 12)	9553	NM_183240	140738		NM_183240	ENSG00000171227	TMEM37	PR|PR1	transmembrane protein 37	protein-coding
7285	chr15	45278970	45279828	+	20	NA	promoter-TSS (NR_120335)	promoter-TSS (NR_120335)	-177	NR_120335	101928414		NR_120335	ENSG00000259520	SLC28A2-AS1	-	SLC28A2 antisense RNA 1	ncRNA
8295	chr10	114937876	114939012	+	20	NA	exon (NM_139169, exon 1 of 8)	exon (NM_139169, exon 1 of 8)	249	NM_139169	142940		NM_139169	ENSG00000165832	TRUB1	PUS4	TruB pseudouridine synthase family member 1	protein-coding
6596-2	chr17	2894736	2895555	+	20	NA	intron (NM_001100398, intron 2 of 23)	MER113|DNA|hAT-Charlie	70750	NR_110818	101927911		NR_110818	ENSG00000262884	LOC101927911	-	uncharacterized LOC101927911	ncRNA
8151	chr2	9797839	9798683	+	20	NA	Intergenic	Intergenic	-45181	NM_001318976	9014		NM_005680	ENSG00000115750	TAF1B	MGC:9349|RAF1B|RAFI63|SL1|TAFI63	TATA-box binding protein associated factor, RNA polymerase I subunit B	protein-coding
7253	chr1	32772588	32773501	+	20	NA	3' UTR (NM_001198973, exon 5 of 5)	3' UTR (NM_001198973, exon 5 of 5)	7417	NM_001198972	57648		NM_020888	ENSG00000162522	NHSL3	KIAA1522	NHS like 3	protein-coding
12383	chr8	30410935	30412486	+	20	NA	intron (NM_006867, intron 1 of 9)	AluSg|SINE|Alu	-26309	NR_046205	100128750		NR_046205	ENSG00000254109	RBPMS-AS1	TP53LC06	RBPMS antisense RNA 1	ncRNA
8175	chr3	58249407	58250761	+	20	NA	intron (NM_001320126, intron 2 of 9)	intron (NM_001320126, intron 2 of 9)	12292	NM_001320126	57406		NM_020676	ENSG00000163686	ABHD6	-	abhydrolase domain containing 6, acylglycerol lipase	protein-coding
11725	chr15	89163046	89165152	+	20	NA	intron (NM_152924, intron 5 of 10)	intron (NM_152924, intron 5 of 10)	57480	NM_000326	6017		NM_000326	ENSG00000140522	RLBP1	CRALBP	retinaldehyde binding protein 1	protein-coding
9070-3	chr4	76251136	76252415	+	20	NA	promoter-TSS (NM_001242939)	promoter-TSS (NM_001242939)	54	NM_001136570	100129583		NM_001136570	ENSG00000189157	FAM47E	-	family with sequence similarity 47 member E	protein-coding
11648-2	chr3	192283799	192285295	+	20	NA	intron (NM_001377292, intron 3 of 4)	intron (NM_001377292, intron 3 of 4)	45917	NR_046596	100873986		NR_046596	ENSG00000231383	FGF12-AS1	-	FGF12 antisense RNA 1	ncRNA
11352	chr18	64099929	64101607	+	20	NA	intron (NR_027245, intron 1 of 3)	intron (NR_027245, intron 1 of 3)	-3323	NR_033881	284294		NR_033881	ENSG00000267134	LINC01924	-	long intergenic non-protein coding RNA 1924	ncRNA
15929	chr2	64988357	64989200	+	20	NA	promoter-TSS (NM_003038)	promoter-TSS (NM_003038)	299	NM_001348406	6509		NM_003038	ENSG00000115902	SLC1A4	ASCT1|SATT|SPATCCM	solute carrier family 1 member 4	protein-coding
10431	chr5	127934765	127936077	+	20	NA	intron (NM_001317938, intron 6 of 6)	intron (NM_001317938, intron 6 of 6)	147754	NR_152805	644873		NR_015360	ENSG00000245937	SLC12A2-DT	LINC01184	SLC12A2 divergent transcript	ncRNA
16575	chr21	44300401	44302074	+	20	NA	intron (NM_002626, intron 1 of 21)	intron (NM_002626, intron 1 of 21)	1184	NM_001002021	5211		NM_002626	ENSG00000141959	PFKL	ATP-PFK|PFK-B|PFK-L	phosphofructokinase, liver type	protein-coding
8378	chr19	54200404	54201461	+	20	NA	promoter-TSS (NR_135762).2	promoter-TSS (NR_135762).2	74	NM_001321701	6203		NM_001013	ENSG00000170889	RPS9	S9|uS4	ribosomal protein S9	protein-coding
8246-2	chr8	140918570	140919654	+	20	NA	intron (NM_001352732, intron 1 of 32)	intron (NM_001352732, intron 1 of 32)	81892	NM_001352710	5747		NM_005607	ENSG00000169398	PTK2	FADK|FADK 1|FAK|FAK1|FRNK|PPP1R71|p125FAK|pp125FAK	protein tyrosine kinase 2	protein-coding
10170-2	chr16	81314280	81315334	+	20	NA	promoter-TSS (NM_001377486)	promoter-TSS (NM_001377486)	-155	NM_001377486	8139		NM_022041	ENSG00000261609	GAN	GAN1|GIG|KLHL16	gigaxonin	protein-coding
7172	chr1	236862676	236863648	+	20	NA	intron (NM_000254, intron 21 of 32)	intron (NM_000254, intron 21 of 32)	67870	NM_000254	4548		NM_000254	ENSG00000116984	MTR	HMAG|MS|cblG	5-methyltetrahydrofolate-homocysteine methyltransferase	protein-coding
14674-2	chr9	6412616	6414702	+	20	NA	intron (NR_046386, intron 1 of 16)	CpG	460	NM_152896	115426		NM_152306	ENSG00000147854	UHRF2	NIRF|RNF107|TDRD23|URF2	ubiquitin like with PHD and ring finger domains 2	protein-coding
7983-2	chr8	79873373	79874555	+	20	NA	Intergenic	Intergenic	-2227	NR_110954	101927040		NR_110954	ENSG00000249328	LOC101927040	-	uncharacterized LOC101927040	ncRNA
8380-2	chr2	216619319	216619932	+	20	NA	Intergenic	Intergenic	-12687	NR_110392	101928232		NR_110392		LINC01280	-	long intergenic non-protein coding RNA 1280	ncRNA
10797-2	chr5	92979331	92980382	+	20	NA	Intergenic	Intergenic	591487	NR_109825	441094		NR_015369	ENSG00000237187	NR2F1-AS1	-	NR2F1 antisense RNA 1	ncRNA
12177	chr1	117181226	117182533	+	20	NA	intron (NM_024626, intron 1 of 5)	intron (NM_024626, intron 1 of 5)	21957	NM_001253849	79679		NM_024626	ENSG00000134258	VTCN1	B7-H4|B7H4|B7S1|B7X|B7h.5|PRO1291|VCTN1	V-set domain containing T cell activation inhibitor 1	protein-coding
7328-2	chr5	14581099	14581976	+	20	NA	promoter-TSS (NM_019018)	promoter-TSS (NM_019018)	-255	NM_019018	54491		NM_019018	ENSG00000145569	OTULINL	FAM105A|NET20	OTU deubiquitinase with linear linkage specificity like	protein-coding
7935-2	chr3	186532261	186533047	+	20	NA	Intergenic	Intergenic	11726	NM_017541	1427		NM_017541	ENSG00000213139	CRYGS	CRYG8|CTRCT20	crystallin gamma S	protein-coding
13733	chr2	149073095	149074675	+	20	NA	intron (NM_001317006, intron 1 of 4)	intron (NM_001317006, intron 1 of 4)	-3637	NM_001317004	130576		NM_177964	ENSG00000150556	LYPD6B	CT116|LYPD7	LY6/PLAUR domain containing 6B	protein-coding
8154-3	chr9	27625962	27627141	+	19	NA	Intergenic	Intergenic	-52685	NM_145005	203228		NM_018325	ENSG00000147894	C9orf72	ALSFTD|DENND9|DENNL72|FTDALS|FTDALS1	C9orf72-SMCR8 complex subunit	protein-coding
18529	chrX	56563158	56564680	+	19	NA	exon (NM_013444, exon 1 of 1)	exon (NM_013444, exon 1 of 1)	292	NM_013444	29978		NM_013444	ENSG00000188021	UBQLN2	ALS15|CHAP1|DSK2|HRIHFB2157|N4BP4|PLIC2	ubiquilin 2	protein-coding
6473	chr14	30690246	30690815	+	19	NA	intron (NM_001257376, intron 12 of 22)	L1HS|LINE|L1	68211	NM_016106	23256		NM_016106	ENSG00000092108	SCFD1	C14orf163|RA410|SLY1|SLY1P|STXBP1L2	sec1 family domain containing 1	protein-coding
8802	chr20	8325463	8326615	+	19	NA	intron (NM_015192, intron 2 of 31)	intron (NM_015192, intron 2 of 31)	77335	NR_046809	100874337		NR_046809	ENSG00000225479	PLCB1-IT1	-	PLCB1 intronic transcript 1	ncRNA
8833	chr10	34669921	34671159	+	19	NA	intron (NM_019619, intron 2 of 24)	intron (NM_019619, intron 2 of 24)	144756	NM_019619	56288		NM_019619	ENSG00000148498	PARD3	ASIP|Baz|PAR3|PAR3alpha|PARD-3|PARD3A|PPP1R118|SE2-5L16|SE2-5LT1|SE2-5T2	par-3 family cell polarity regulator	protein-coding
16733	chr13	26560828	26562881	+	19	NA	intron (NM_006646, intron 1 of 9)	MER119|DNA|hAT-Charlie	4151	NM_001291965	10810		NM_006646	ENSG00000132970	WASF3	Brush-1|SCAR3|WAVE3	WASP family member 3	protein-coding
[truncated: 3,839 more rows]
