# Supplementary material for: Epigenetic control of PDX1 and NGN3 by a computationally designed PRC2 inhibitor enforces pancreatic endocrine differentiation from pluripotent stem cells
Source: Research Square preprint supplement (doi:10.21203/rs.3.rs-9115136/v1), 2026-03-26
Supplement: Supplementary file 4 [file ad7551e0eaf59d29152e4365.xlsx]

## Sheet: Sheet1
Table S7. GSEA of Protein coding genes concordantly regulated in H1 and MEL1 Double hESC treated with PDX1/NGN3-guided EBdCas9 vs EBdCas9 only
ID	Description	setSize	enrichmentScore	NES	pvalue	p.adjust	qvalue	rank	leading_edge	core_enrichment
REACTOME_SIGNALING_BY_PTK6	REACTOME_SIGNALING_BY_PTK6	12	0.854743	1.93416	0.000453416	0.264342	0.264342	238	tags=33%, list=5%, signal=32%	NRG4/GPNMB/PTK6/BTC
REACTOME_AMINO_ACIDS_REGULATE_MTORC1	REACTOME_AMINO_ACIDS_REGULATE_MTORC1	11	0.837694	1.83819	0.00309775	0.511104	0.511104	150	tags=18%, list=3%, signal=18%	CASTOR1/ATP6V1G2
REACTOME_TNFR2_NON_CANONICAL_NF_KB_PATHWAY	REACTOME_TNFR2_NON_CANONICAL_NF_KB_PATHWAY	26	0.685042	1.8214	0.00413961	0.511104	0.511104	461	tags=27%, list=9%, signal=25%	TNF/TNFRSF11A/TNFRSF18/PSMB9/TNFRSF14/LTB/TNFSF13
REACTOME_GLYCOSPHINGOLIPID_BIOSYNTHESIS	REACTOME_GLYCOSPHINGOLIPID_BIOSYNTHESIS	10	-0.832153	-1.76231	0.00377708	0.511104	0.511104	226	tags=30%, list=4%, signal=29%	ST8SIA5/B4GALNT1/ST6GALNAC6
REACTOME_MUSCLE_CONTRACTION	REACTOME_MUSCLE_CONTRACTION	51	-0.596076	-1.72366	0.0043834	0.511104	0.511104	662	tags=41%, list=13%, signal=36%	SLC8A2/KCNJ2/RYR2/KCNK3/MYLK/KCNIP2/SCN3B/ACTG2/KCNE3/KCND2/ATP2A1/MYBPC1/SCN2A/FGF11/RYR1/LMOD1/CASQ1/CORIN/MYH8/KCNK15/MYH6
REACTOME_EXTRACELLULAR_MATRIX_ORGANIZATION	REACTOME_EXTRACELLULAR_MATRIX_ORGANIZATION	89	-0.507532	-1.60391	0.0055842	0.542598	0.542598	783	tags=25%, list=15%, signal=21%	TLL2/COL7A1/CAPN6/SH3PXD2A/COL11A1/BGN/COL1A2/COLGALT2/FBLN2/MMP13/NCAM1/COL11A2/ADAMTS14/ITGA10/VCAM1/ITGB3/CAPN11/COL9A3/COL4A4/JAM2/ELN/SCUBE1
REACTOME_INTEGRIN_CELL_SURFACE_INTERACTIONS	REACTOME_INTEGRIN_CELL_SURFACE_INTERACTIONS	27	-0.667121	-1.73361	0.00998063	0.831244	0.831244	208	tags=26%, list=4%, signal=25%	COL1A2/ITGA10/VCAM1/ITGB3/COL9A3/COL4A4/JAM2
REACTOME_TP53_REGULATES_METABOLIC_GENES	REACTOME_TP53_REGULATES_METABOLIC_GENES	16	0.732799	1.75854	0.0146981	0.930254	0.930254	2	tags=6%, list=0%, signal=6%	TP63
REACTOME_TNF_SIGNALING	REACTOME_TNF_SIGNALING	19	0.699501	1.7349	0.0158879	0.930254	0.930254	6	tags=5%, list=0%, signal=5%	TNF
REACTOME_TP53_REGULATES_TRANSCRIPTION_OF_CELL_DEATH_GENES	REACTOME_TP53_REGULATES_TRANSCRIPTION_OF_CELL_DEATH_GENES	14	0.734482	1.71097	0.0259968	0.930254	0.930254	2	tags=7%, list=0%, signal=7%	TP63
REACTOME_SIGNALING_BY_ERBB2	REACTOME_SIGNALING_BY_ERBB2	11	0.772997	1.69622	0.0186605	0.930254	0.930254	238	tags=27%, list=5%, signal=26%	NRG4/PTK6/BTC
REACTOME_COLLAGEN_BIOSYNTHESIS_AND_MODIFYING_ENZYMES	REACTOME_COLLAGEN_BIOSYNTHESIS_AND_MODIFYING_ENZYMES	23	-0.663817	-1.66383	0.0221887	0.930254	0.930254	1207	tags=57%, list=24%, signal=43%	COL18A1/COL4A6/COL22A1/COL17A1/TLL2/COL7A1/COL11A1/COL1A2/COLGALT2/COL11A2/ADAMTS14/COL9A3/COL4A4
REACTOME_TNFR1_INDUCED_PROAPOPTOTIC_SIGNALING	REACTOME_TNFR1_INDUCED_PROAPOPTOTIC_SIGNALING	10	0.776321	1.65829	0.0268826	0.930254	0.930254	6	tags=10%, list=0%, signal=10%	TNF
REACTOME_VOLTAGE_GATED_POTASSIUM_CHANNELS	REACTOME_VOLTAGE_GATED_POTASSIUM_CHANNELS	17	0.685447	1.65792	0.0269016	0.930254	0.930254	201	tags=35%, list=4%, signal=34%	KCNG2/KCNQ5/KCNV2/KCNV1/KCNAB1/KCNQ1
REACTOME_APC_C_CDH1_MEDIATED_DEGRADATION_OF_CDC20_AND_OTHER_APC_C_CDH1_TARGETED_PROTEINS_IN_LATE_MITOSIS_EARLY_G1	REACTOME_APC_C_CDH1_MEDIATED_DEGRADATION_OF_CDC20_AND_OTHER_APC_C_CDH1_TARGETED_PROTEINS_IN_LATE_MITOSIS_EARLY_G1	23	0.636124	1.64977	0.0386998	0.930254	0.930254	923	tags=39%, list=18%, signal=32%	AURKB/PSMB9/ANAPC15/PTTG1/CDC20/PSMA6/ANAPC4/PLK1/AURKA
REACTOME_REPRODUCTION	REACTOME_REPRODUCTION	17	0.667711	1.61502	0.0408135	0.930254	0.930254	259	tags=18%, list=5%, signal=17%	IZUMO1/CATSPER3/MSH5
REACTOME_SUMOYLATION_OF_DNA_REPLICATION_PROTEINS	REACTOME_SUMOYLATION_OF_DNA_REPLICATION_PROTEINS	13	0.689457	1.61223	0.0593049	0.930254	0.930254	22	tags=8%, list=0%, signal=8%	AURKB
REACTOME_COLLAGEN_FORMATION	REACTOME_COLLAGEN_FORMATION	29	-0.613522	-1.61074	0.0366886	0.930254	0.930254	1340	tags=52%, list=26%, signal=38%	CTSV/COL18A1/COL4A6/COL22A1/COL17A1/TLL2/COL7A1/COL11A1/COL1A2/COLGALT2/MMP13/COL11A2/ADAMTS14/COL9A3/COL4A4
REACTOME_NEUREXINS_AND_NEUROLIGINS	REACTOME_NEUREXINS_AND_NEUROLIGINS	12	-0.740443	-1.6078	0.0256747	0.930254	0.930254	548	tags=50%, list=11%, signal=45%	NRXN3/NLGN1/GRM1/BEGAIN/LIN7B/SYT12
REACTOME_TRANSCRIPTIONAL_REGULATION_BY_THE_AP_2_TFAP2_FAMILY_OF_TRANSCRIPTION_FACTORS	REACTOME_TRANSCRIPTIONAL_REGULATION_BY_THE_AP_2_TFAP2_FAMILY_OF_TRANSCRIPTION_FACTORS	10	-0.756958	-1.60306	0.0464065	0.930254	0.930254	13	tags=20%, list=0%, signal=20%	KIT/ESR1
REACTOME_DEGRADATION_OF_THE_EXTRACELLULAR_MATRIX	REACTOME_DEGRADATION_OF_THE_EXTRACELLULAR_MATRIX	39	-0.570306	-1.59323	0.0301184	0.930254	0.930254	783	tags=31%, list=15%, signal=26%	TLL2/COL7A1/CAPN6/COL11A1/COL1A2/MMP13/COL11A2/CAPN11/COL9A3/COL4A4/ELN/SCUBE1
REACTOME_POTASSIUM_CHANNELS	REACTOME_POTASSIUM_CHANNELS	36	0.569952	1.58876	0.0350104	0.930254	0.930254	498	tags=31%, list=10%, signal=28%	KCNG2/KCNQ5/KCNV2/KCNN4/KCNV1/KCNAB1/KCNQ1/GNG11/KCNG1/KCNN2/KCNMB4
REACTOME_CELLULAR_RESPONSE_TO_STARVATION	REACTOME_CELLULAR_RESPONSE_TO_STARVATION	20	0.627312	1.58446	0.0539437	0.930254	0.930254	327	tags=15%, list=6%, signal=14%	CASTOR1/ATP6V1G2/RPS10
REACTOME_ACTIVATION_OF_BH3_ONLY_PROTEINS	REACTOME_ACTIVATION_OF_BH3_ONLY_PROTEINS	10	0.740641	1.58207	0.0614136	0.930254	0.930254	543	tags=30%, list=11%, signal=27%	TP63/BCL2/E2F1
REACTOME_GLUCOSE_METABOLISM	REACTOME_GLUCOSE_METABOLISM	22	0.606484	1.58163	0.0717848	0.930254	0.930254	232	tags=14%, list=5%, signal=13%	PFKFB1/SLC37A2/GCKR
REACTOME_FOXO_MEDIATED_TRANSCRIPTION	REACTOME_FOXO_MEDIATED_TRANSCRIPTION	19	0.636482	1.5786	0.0549615	0.930254	0.930254	71	tags=11%, list=1%, signal=10%	TRIM63/IGFBP1
REACTOME_INTEGRATION_OF_ENERGY_METABOLISM	REACTOME_INTEGRATION_OF_ENERGY_METABOLISM	33	0.574326	1.57534	0.0334746	0.930254	0.930254	354	tags=21%, list=7%, signal=20%	KCNG2/PFKFB1/ADCY4/GNG11/CACNB2/SNAP25/ADRA2C
REACTOME_SIGNALING_BY_TYPE_1_INSULIN_LIKE_GROWTH_FACTOR_1_RECEPTOR_IGF1R	REACTOME_SIGNALING_BY_TYPE_1_INSULIN_LIKE_GROWTH_FACTOR_1_RECEPTOR_IGF1R	13	-0.717111	-1.5734	0.0442859	0.930254	0.930254	274	tags=31%, list=5%, signal=29%	FGF5/KL/FGF17/IRS4
REACTOME_PROTEIN_PROTEIN_INTERACTIONS_AT_SYNAPSES	REACTOME_PROTEIN_PROTEIN_INTERACTIONS_AT_SYNAPSES	22	-0.635166	-1.56657	0.0475201	0.930254	0.930254	548	tags=41%, list=11%, signal=37%	NRXN3/NLGN1/GRM1/SLITRK2/BEGAIN/LIN7B/PPFIA2/SLITRK1/SYT12
REACTOME_SIGNALING_BY_PDGF	REACTOME_SIGNALING_BY_PDGF	17	-0.661962	-1.55302	0.0518706	0.930254	0.930254	300	tags=18%, list=6%, signal=17%	THBS4/COL9A3/COL4A4
REACTOME_COLLAGEN_CHAIN_TRIMERIZATION	REACTOME_COLLAGEN_CHAIN_TRIMERIZATION	13	-0.707235	-1.55173	0.0572612	0.930254	0.930254	1332	tags=77%, list=26%, signal=57%	COL18A1/COL4A6/COL22A1/COL17A1/COL7A1/COL11A1/COL1A2/COL11A2/COL9A3/COL4A4
REACTOME_SIGNALING_BY_FGFR1	REACTOME_SIGNALING_BY_FGFR1	10	-0.732418	-1.5511	0.077999	0.930254	0.930254	496	tags=40%, list=10%, signal=36%	FLRT1/FGF5/KL/FGF17
REACTOME_ASSEMBLY_OF_COLLAGEN_FIBRILS_AND_OTHER_MULTIMERIC_STRUCTURES	REACTOME_ASSEMBLY_OF_COLLAGEN_FIBRILS_AND_OTHER_MULTIMERIC_STRUCTURES	21	-0.623129	-1.5326	0.0451389	0.930254	0.930254	1340	tags=57%, list=26%, signal=42%	CTSV/COL18A1/COL4A6/COL17A1/TLL2/COL7A1/COL11A1/COL1A2/MMP13/COL11A2/COL9A3/COL4A4
REACTOME_RHOU_GTPASE_CYCLE	REACTOME_RHOU_GTPASE_CYCLE	10	-0.720555	-1.52597	0.0523466	0.930254	0.930254	415	tags=20%, list=8%, signal=18%	PAK3/ARHGEF6
REACTOME_IRON_UPTAKE_AND_TRANSPORT	REACTOME_IRON_UPTAKE_AND_TRANSPORT	12	0.670437	1.5171	0.0691145	0.930254	0.930254	475	tags=25%, list=9%, signal=23%	CYBRD1/ATP6V1G2/TFR2
REACTOME_APC_C_MEDIATED_DEGRADATION_OF_CELL_CYCLE_PROTEINS	REACTOME_APC_C_MEDIATED_DEGRADATION_OF_CELL_CYCLE_PROTEINS	31	0.552241	1.49733	0.0661971	0.930254	0.930254	1570	tags=55%, list=31%, signal=38%	AURKB/PSMB9/ANAPC15/PTTG1/CDC20/PSMA6/ANAPC4/PLK1/AURKA/CCNB1/CCNA1/FBXO5/CCNA2/PSMD12/CDK2/PSMD14/ANAPC10
REACTOME_CYCLIN_D_ASSOCIATED_EVENTS_IN_G1	REACTOME_CYCLIN_D_ASSOCIATED_EVENTS_IN_G1	13	0.634138	1.48287	0.0831557	0.930254	0.930254	1431	tags=69%, list=28%, signal=50%	PTK6/CCNE2/E2F1/CDKN2D/LYN/E2F5/CCNH/CKS1B/CDK2
REACTOME_POST_TRANSLATIONAL_MODIFICATION_SYNTHESIS_OF_GPI_ANCHORED_PROTEINS	REACTOME_POST_TRANSLATIONAL_MODIFICATION_SYNTHESIS_OF_GPI_ANCHORED_PROTEINS	24	-0.584441	-1.48066	0.0475352	0.930254	0.930254	675	tags=33%, list=13%, signal=29%	GPLD1/RTN4RL1/BST1/TECTA/GP2/NTNG2/LY6G6C/CNTN5
REACTOME_NCAM_SIGNALING_FOR_NEURITE_OUT_GROWTH	REACTOME_NCAM_SIGNALING_FOR_NEURITE_OUT_GROWTH	20	-0.610292	-1.48009	0.0526316	0.930254	0.930254	365	tags=35%, list=7%, signal=33%	SPTBN5/NCAM1/ST8SIA4/SPTBN4/GFRA2/COL9A3/COL4A4
REACTOME_MITOPHAGY	REACTOME_MITOPHAGY	12	0.653534	1.47885	0.0799136	0.930254	0.930254	98	tags=8%, list=2%, signal=8%	TOMM5
REACTOME_INTRINSIC_PATHWAY_FOR_APOPTOSIS	REACTOME_INTRINSIC_PATHWAY_FOR_APOPTOSIS	16	0.614822	1.47542	0.0877598	0.930254	0.930254	2	tags=6%, list=0%, signal=6%	TP63
REACTOME_TRANSCRIPTIONAL_REGULATION_OF_WHITE_ADIPOCYTE_DIFFERENTIATION	REACTOME_TRANSCRIPTIONAL_REGULATION_OF_WHITE_ADIPOCYTE_DIFFERENTIATION	21	0.575101	1.46478	0.084507	0.930254	0.930254	6	tags=5%, list=0%, signal=5%	TNF
REACTOME_COLLAGEN_DEGRADATION	REACTOME_COLLAGEN_DEGRADATION	19	-0.605576	-1.45977	0.0588235	0.930254	0.930254	749	tags=42%, list=15%, signal=36%	COL17A1/COL7A1/COL11A1/COL1A2/MMP13/COL11A2/COL9A3/COL4A4
REACTOME_CARDIAC_CONDUCTION	REACTOME_CARDIAC_CONDUCTION	40	-0.519453	-1.45442	0.0535714	0.930254	0.930254	829	tags=42%, list=16%, signal=36%	MME/KCNE4/SLC8A2/KCNJ2/RYR2/KCNK3/KCNIP2/SCN3B/KCNE3/KCND2/ATP2A1/SCN2A/FGF11/RYR1/CASQ1/CORIN/KCNK15
REACTOME_SIGNALING_BY_RECEPTOR_TYROSINE_KINASES	REACTOME_SIGNALING_BY_RECEPTOR_TYROSINE_KINASES	135	-0.42748	-1.43163	0.0271904	0.930254	0.930254	625	tags=20%, list=12%, signal=18%	CDK5R1/COL11A1/FGFBP3/COL1A2/AKT3/FLRT1/PAK3/SH3GL3/COL11A2/VEGFC/GRAP2/THBS4/ALKAL1/FGF5/KL/FOSB/HGFAC/ALKAL2/FGF17/ITGB3/GABRQ/IRS4/COL9A3/COL4A4/GABRB1/ALK/ESR1
REACTOME_NON_INTEGRIN_MEMBRANE_ECM_INTERACTIONS	REACTOME_NON_INTEGRIN_MEMBRANE_ECM_INTERACTIONS	18	-0.592157	-1.4146	0.0829016	0.930254	0.930254	603	tags=50%, list=12%, signal=44%	LAMB2/AGRN/COL4A6/PRKCA/COL11A1/COL1A2/COL11A2/ITGB3/COL4A4
REACTOME_P75_NTR_RECEPTOR_MEDIATED_SIGNALLING	REACTOME_P75_NTR_RECEPTOR_MEDIATED_SIGNALLING	20	-0.582662	-1.41308	0.077193	0.930254	0.930254	15	tags=30%, list=0%, signal=30%	MCF2L/VAV2/BCL2L11/KALRN/VAV3/ARHGEF6
REACTOME_ABC_FAMILY_PROTEINS_MEDIATED_TRANSPORT	REACTOME_ABC_FAMILY_PROTEINS_MEDIATED_TRANSPORT	32	-0.523659	-1.40186	0.078727	0.930254	0.930254	140	tags=12%, list=3%, signal=12%	ABCB4/DERL3/ABCC11/ABCA8
REACTOME_GLYCOSPHINGOLIPID_METABOLISM	REACTOME_GLYCOSPHINGOLIPID_METABOLISM	23	-0.55849	-1.39983	0.0870337	0.930254	0.930254	685	tags=22%, list=13%, signal=19%	ENPP7/ARSG/ST8SIA5/B4GALNT1/ST6GALNAC6
REACTOME_ACTIVATION_OF_NMDA_RECEPTORS_AND_POSTSYNAPTIC_EVENTS	REACTOME_ACTIVATION_OF_NMDA_RECEPTORS_AND_POSTSYNAPTIC_EVENTS	25	-0.544444	-1.39699	0.0834783	0.930254	0.930254	358	tags=28%, list=7%, signal=26%	PPM1E/PRKAR2B/LIN7B/GRIN3A/CAMKK1/MAPT/TUBB1
REACTOME_CELL_SURFACE_INTERACTIONS_AT_THE_VASCULAR_WALL	REACTOME_CELL_SURFACE_INTERACTIONS_AT_THE_VASCULAR_WALL	33	-0.514675	-1.3942	0.0797342	0.930254	0.930254	562	tags=21%, list=11%, signal=19%	COL1A2/ANGPT2/SELL/VPREB3/ANGPT1/ITGB3/JAM2
REACTOME_REGULATION_OF_TP53_ACTIVITY	REACTOME_REGULATION_OF_TP53_ACTIVITY	62	0.446766	1.37002	0.0857909	0.930254	0.930254	22	tags=3%, list=0%, signal=3%	TP63/AURKB
REACTOME_CDC42_GTPASE_CYCLE	REACTOME_CDC42_GTPASE_CYCLE	44	-0.478034	-1.36371	0.0772947	0.930254	0.930254	1063	tags=30%, list=21%, signal=24%	MAP3K11/GMIP/VAV3/ARHGAP24/SYDE1/ARHGAP4/SH3PXD2A/WDR91/FMNL3/PAK3/ARHGEF25/CDC42EP5/ARHGEF6
REACTOME_SIGNALING_BY_GPCR	REACTOME_SIGNALING_BY_GPCR	157	-0.377722	-1.27859	0.075643	0.930254	0.930254	670	tags=27%, list=13%, signal=25%	FZD9/P2RY11/GNG2/NPW/SSTR2/BDKRB2/HCAR1/RGS10/PDE4A/OPRD1/CASR/ADCY3/DGKI/PLPPR3/AKT3/PTH1R/WNT3/GNG7/GRM1/WNT10B/GALR2/ARHGEF25/SSTR5/ACKR1/GPR55/CALCR/C5AR1/NMB/DGKG/PRKAR2B/GPR17/PLPPR4/PIK3R5/GPR176/MC1R/CAMKK1/HTR1B/NMUR1/PTHLH/TAS2R14/DRD1/UTS2B/ARHGEF6
REACTOME_RHO_GTPASE_CYCLE	REACTOME_RHO_GTPASE_CYCLE	110	-0.396892	-1.27833	0.0757098	0.930254	0.930254	1474	tags=34%, list=29%, signal=24%	RHOBTB2/MCF2L/ARAP1/GFOD1/ARHGAP19/NISCH/VAV2/PRAG1/ARHGAP18/TAOK3/ARHGAP31/RHOF/RND1/PLEKHG3/HGS/KALRN/MAP3K11/GMIP/VAV3/DIAPH2/ARHGAP24/SYDE1/UBXN11/ARHGAP6/ARHGAP4/ARHGEF28/SH3PXD2A/WDR91/FMNL3/PAK3/ARHGEF25/ARHGAP11A/CCDC187/ZNF512B/FILIP1/CDC42EP5/ARHGEF6
REACTOME_DISEASES_OF_IMMUNE_SYSTEM	REACTOME_DISEASES_OF_IMMUNE_SYSTEM	10	-0.692147	-1.46581	0.0902527	0.939595	0.939595	452	tags=40%, list=9%, signal=37%	TLR6/IRAK4/TLR1/S100A1
REACTOME_SARS_COV_1_HOST_INTERACTIONS	REACTOME_SARS_COV_1_HOST_INTERACTIONS	14	0.620007	1.44431	0.0964126	0.9691	0.9691	1279	tags=64%, list=25%, signal=48%	BST2/RPS10/RIPK3/NPIPB3/IRAK2/SERPINE1/PYCARD/PPIH/CAV1
REACTOME_NCAM1_INTERACTIONS	REACTOME_NCAM1_INTERACTIONS	15	-0.629722	-1.42921	0.0953237	0.9691	0.9691	365	tags=33%, list=7%, signal=31%	NCAM1/ST8SIA4/GFRA2/COL9A3/COL4A4
REACTOME_CELL_DEATH_SIGNALLING_VIA_NRAGE_NRIF_AND_NADE	REACTOME_CELL_DEATH_SIGNALLING_VIA_NRAGE_NRIF_AND_NADE	17	-0.597927	-1.40279	0.0980736	0.9691	0.9691	15	tags=35%, list=0%, signal=35%	MCF2L/VAV2/BCL2L11/KALRN/VAV3/ARHGEF6
REACTOME_CYTOSOLIC_SENSORS_OF_PATHOGEN_ASSOCIATED_DNA	REACTOME_CYTOSOLIC_SENSORS_OF_PATHOGEN_ASSOCIATED_DNA	15	-0.619318	-1.40559	0.102518	0.979803	0.979803	5	tags=13%, list=0%, signal=13%	NLRC3/AIM2
REACTOME_NRAGE_SIGNALS_DEATH_THROUGH_JNK	REACTOME_NRAGE_SIGNALS_DEATH_THROUGH_JNK	15	-0.615716	-1.39742	0.102518	0.979803	0.979803	15	tags=40%, list=0%, signal=40%	MCF2L/VAV2/BCL2L11/KALRN/VAV3/ARHGEF6
REACTOME_KERATAN_SULFATE_KERATIN_METABOLISM	REACTOME_KERATAN_SULFATE_KERATIN_METABOLISM	13	0.607719	1.42109	0.10661	0.981481	0.981481	1038	tags=46%, list=20%, signal=37%	CHST5/LUM/ST3GAL4/B3GNT7/ACAN/HEXA
REACTOME_FORMATION_OF_PARAXIAL_MESODERM	REACTOME_FORMATION_OF_PARAXIAL_MESODERM	20	0.557255	1.40751	0.113426	0.981481	0.981481	270	tags=15%, list=5%, signal=14%	NOG/MESP2/PSMB9
REACTOME_INTERLEUKIN_4_AND_INTERLEUKIN_13_SIGNALING	REACTOME_INTERLEUKIN_4_AND_INTERLEUKIN_13_SIGNALING	24	0.535569	1.40007	0.112903	0.981481	0.981481	400	tags=17%, list=8%, signal=15%	TNF/IL12A/BCL2/IL18
REACTOME_REGULATED_NECROSIS	REACTOME_REGULATED_NECROSIS	16	0.581695	1.39593	0.117783	0.981481	0.981481	2	tags=6%, list=0%, signal=6%	TP63
REACTOME_INSULIN_RECEPTOR_SIGNALLING_CASCADE	REACTOME_INSULIN_RECEPTOR_SIGNALLING_CASCADE	13	-0.630575	-1.38353	0.11257	0.981481	0.981481	274	tags=23%, list=5%, signal=22%	FGF5/KL/FGF17
REACTOME_SYNTHESIS_OF_PIPS_AT_THE_PLASMA_MEMBRANE	REACTOME_SYNTHESIS_OF_PIPS_AT_THE_PLASMA_MEMBRANE	14	-0.608112	-1.37715	0.120504	0.981481	0.981481	1398	tags=64%, list=27%, signal=47%	INPPL1/INPP4B/INPP5D/PLEKHA6/PIK3CD/PLEKHA4/INPP5J/PIK3R5/PLEKHA2
REACTOME_ECM_PROTEOGLYCANS	REACTOME_ECM_PROTEOGLYCANS	21	-0.557638	-1.37152	0.107639	0.981481	0.981481	1415	tags=62%, list=28%, signal=45%	TGFB2/LAMB2/ITGA7/AGRN/COL4A6/ITGA9/TGFB3/BGN/COL1A2/NCAM1/ITGB3/COL9A3/COL4A4
REACTOME_ADIPOGENESIS	REACTOME_ADIPOGENESIS	30	0.496686	1.35321	0.119332	0.981481	0.981481	6	tags=3%, list=0%, signal=3%	TNF
REACTOME_L1CAM_INTERACTIONS	REACTOME_L1CAM_INTERACTIONS	33	-0.488368	-1.32293	0.119601	0.981481	0.981481	665	tags=24%, list=13%, signal=21%	SPTBN5/SCN3B/NCAM1/SCN2A/ITGA10/SPTBN4/TUBB1/ITGB3
REACTOME_TRANSMISSION_ACROSS_CHEMICAL_SYNAPSES	REACTOME_TRANSMISSION_ACROSS_CHEMICAL_SYNAPSES	74	-0.415401	-1.26878	0.121212	0.981481	0.981481	552	tags=27%, list=11%, signal=24%	GNG2/KCNJ2/ADCY3/TSPOAP1/CHRNA7/GNG7/PPM1E/CHRNA3/PRKAR2B/LIN7B/GRIN3A/CAMKK1/MAPT/TUBB1/SLC6A3/SLC18A2/GABRQ/GABRB1/PPFIA2/GAD1
REACTOME_NERVOUS_SYSTEM_DEVELOPMENT	REACTOME_NERVOUS_SYSTEM_DEVELOPMENT	121	-0.381503	-1.25664	0.108232	0.981481	0.981481	1261	tags=33%, list=25%, signal=25%	RGMB/L1CAM/AGRN/EIF4G1/EPHB6/RND1/CYP51A1/KALRN/PRKCA/CACNA1H/EPHA6/VAV3/ITGA9/UNC5C/SLIT1/DOK5/RPL39L/ARHGEF28/PIK3CD/EPHB3/SPTBN5/CDK5R1/PLXNB3/UNC5D/SCN3B/MYH14/PLXNC1/PRX/PAK3/NTN1/NCAM1/ST8SIA4/SCN2A/ITGA10/SPTBN4/TUBB1/ITGB3/GFRA2/COL9A3/COL4A4
REACTOME_A_TETRASACCHARIDE_LINKER_SEQUENCE_IS_REQUIRED_FOR_GAG_SYNTHESIS	REACTOME_A_TETRASACCHARIDE_LINKER_SEQUENCE_IS_REQUIRED_FOR_GAG_SYNTHESIS	10	-0.662612	-1.40326	0.133574	1	1	1413	tags=70%, list=28%, signal=51%	GPC4/XYLT2/AGRN/GPC2/BGN/GPC5/CSPG5
REACTOME_G0_AND_EARLY_G1	REACTOME_G0_AND_EARLY_G1	10	0.652931	1.39471	0.140625	1	1	1431	tags=80%, list=28%, signal=58%	CCNE2/CDC6/E2F1/CDC25A/E2F5/CCNA1/CCNA2/CDK2
REACTOME_KERATAN_SULFATE_BIOSYNTHESIS	REACTOME_KERATAN_SULFATE_BIOSYNTHESIS	10	0.645388	1.3786	0.147321	1	1	949	tags=50%, list=19%, signal=41%	CHST5/LUM/ST3GAL4/B3GNT7/ACAN
REACTOME_REGULATION_OF_INSULIN_SECRETION	REACTOME_REGULATION_OF_INSULIN_SECRETION	23	0.531144	1.37751	0.134396	1	1	354	tags=22%, list=7%, signal=20%	KCNG2/GNG11/CACNB2/SNAP25/ADRA2C
REACTOME_CYCLIN_A_B1_B2_ASSOCIATED_EVENTS_DURING_G2_M_TRANSITION	REACTOME_CYCLIN_A_B1_B2_ASSOCIATED_EVENTS_DURING_G2_M_TRANSITION	11	0.627332	1.37658	0.145336	1	1	1431	tags=82%, list=28%, signal=59%	PLK1/CDC25A/CDC25C/CCNB1/CCNA1/CCNH/CCNA2/CCNB2/CDK2
REACTOME_IRS_MEDIATED_SIGNALLING	REACTOME_IRS_MEDIATED_SIGNALLING	11	-0.641854	-1.37576	0.125693	1	1	274	tags=27%, list=5%, signal=26%	FGF5/KL/FGF17
REACTOME_IMMUNOREGULATORY_INTERACTIONS_BETWEEN_A_LYMPHOID_AND_A_NON_LYMPHOID_CELL	REACTOME_IMMUNOREGULATORY_INTERACTIONS_BETWEEN_A_LYMPHOID_AND_A_NON_LYMPHOID_CELL	16	-0.594493	-1.37486	0.130053	1	1	710	tags=44%, list=14%, signal=38%	CD160/COL1A2/SELL/NCR3LG1/VCAM1/COLEC12/CD3G
REACTOME_SENSORY_PROCESSING_OF_SOUND	REACTOME_SENSORY_PROCESSING_OF_SOUND	21	0.529317	1.34817	0.150235	1	1	480	tags=38%, list=9%, signal=35%	USH1G/ATP2B2/SLC17A8/CACNB2/SNAP25/CDH23/KCNN2/RAB3A
REACTOME_GOLGI_ASSOCIATED_VESICLE_BIOGENESIS	REACTOME_GOLGI_ASSOCIATED_VESICLE_BIOGENESIS	14	0.572375	1.33335	0.159193	1	1	406	tags=21%, list=8%, signal=20%	TXNDC5/AP4B1/BLOC1S1
REACTOME_ELASTIC_FIBRE_FORMATION	REACTOME_ELASTIC_FIBRE_FORMATION	15	-0.586823	-1.33184	0.145683	1	1	130	tags=33%, list=3%, signal=33%	LTBP3/TGFB3/FBLN2/ITGB3/ELN
REACTOME_ESTROGEN_DEPENDENT_GENE_EXPRESSION	REACTOME_ESTROGEN_DEPENDENT_GENE_EXPRESSION	22	-0.539722	-1.33117	0.128571	1	1	234	tags=9%, list=5%, signal=9%	FOSB/ESR1
REACTOME_TERMINATION_OF_TRANSLESION_DNA_SYNTHESIS	REACTOME_TERMINATION_OF_TRANSLESION_DNA_SYNTHESIS	10	0.621023	1.32656	0.191964	1	1	193	tags=20%, list=4%, signal=19%	UBA7/PCLAF
REACTOME_CROSS_PRESENTATION_OF_SOLUBLE_EXOGENOUS_ANTIGENS_ENDOSOMES	REACTOME_CROSS_PRESENTATION_OF_SOLUBLE_EXOGENOUS_ANTIGENS_ENDOSOMES	13	0.56545	1.32225	0.166311	1	1	641	tags=23%, list=13%, signal=20%	MRC1/PSMB9/PSMA6
REACTOME_SCF_SKP2_MEDIATED_DEGRADATION_OF_P27_P21	REACTOME_SCF_SKP2_MEDIATED_DEGRADATION_OF_P27_P21	20	0.518433	1.30945	0.166667	1	1	1532	tags=50%, list=30%, signal=35%	PTK6/CCNE2/PSMB9/PSMA6/CCNA1/CKS1B/CCNA2/PSMD12/CDK2/PSMD14
REACTOME_SEMAPHORIN_INTERACTIONS	REACTOME_SEMAPHORIN_INTERACTIONS	15	-0.575305	-1.3057	0.170863	1	1	625	tags=60%, list=12%, signal=53%	NRP1/SEMA4D/CRMP1/RND1/CDK5R1/PLXNB3/MYH14/PLXNC1/PAK3
REACTOME_METABOLISM_OF_FAT_SOLUBLE_VITAMINS	REACTOME_METABOLISM_OF_FAT_SOLUBLE_VITAMINS	15	-0.575174	-1.30541	0.170863	1	1	1445	tags=53%, list=28%, signal=38%	LRAT/GPC4/AGRN/PLB1/GPC2/GPC5/BCO1/AKR1B10
REACTOME_TRANSLESION_SYNTHESIS_BY_Y_FAMILY_DNA_POLYMERASES_BYPASSES_LESIONS_ON_DNA_TEMPLATE	REACTOME_TRANSLESION_SYNTHESIS_BY_Y_FAMILY_DNA_POLYMERASES_BYPASSES_LESIONS_ON_DNA_TEMPLATE	13	0.557218	1.303	0.17484	1	1	193	tags=15%, list=4%, signal=15%	UBA7/PCLAF
REACTOME_GABA_RECEPTOR_ACTIVATION	REACTOME_GABA_RECEPTOR_ACTIVATION	14	-0.573551	-1.29888	0.178058	1	1	656	tags=43%, list=13%, signal=37%	GNG2/KCNJ2/ADCY3/GNG7/GABRQ/GABRB1
REACTOME_DEGRADATION_OF_DVL	REACTOME_DEGRADATION_OF_DVL	15	0.543107	1.29472	0.186099	1	1	641	tags=20%, list=13%, signal=18%	HECW1/PSMB9/PSMA6
REACTOME_SARS_COV_1_ACTIVATES_MODULATES_INNATE_IMMUNE_RESPONSES	REACTOME_SARS_COV_1_ACTIVATES_MODULATES_INNATE_IMMUNE_RESPONSES	10	0.605209	1.29278	0.209821	1	1	917	tags=50%, list=18%, signal=41%	BST2/RIPK3/NPIPB3/IRAK2/PYCARD
REACTOME_SIGNALING_BY_MET	REACTOME_SIGNALING_BY_MET	20	-0.532588	-1.29164	0.177193	1	1	1337	tags=45%, list=26%, signal=33%	LAMB2/LRIG1/HGS/RANBP10/COL11A1/COL1A2/SH3GL3/COL11A2/HGFAC
REACTOME_INOSITOL_PHOSPHATE_METABOLISM	REACTOME_INOSITOL_PHOSPHATE_METABOLISM	18	-0.540556	-1.29133	0.177893	1	1	572	tags=39%, list=11%, signal=35%	INPPL1/INPP4B/INPP5D/INPP5J/NUDT10/NUDT3/IP6K3
REACTOME_HEPARAN_SULFATE_HEPARIN_HS_GAG_METABOLISM	REACTOME_HEPARAN_SULFATE_HEPARIN_HS_GAG_METABOLISM	16	-0.557621	-1.28959	0.173989	1	1	1480	tags=56%, list=29%, signal=40%	HS6ST1/GPC4/XYLT2/AGRN/GPC2/BGN/HS3ST5/GPC5/CSPG5
REACTOME_GAP_JUNCTION_TRAFFICKING_AND_REGULATION	REACTOME_GAP_JUNCTION_TRAFFICKING_AND_REGULATION	11	0.585751	1.28534	0.190889	1	1	141	tags=18%, list=3%, signal=18%	GJA10/TUBA3D
REACTOME_G1_S_SPECIFIC_TRANSCRIPTION	REACTOME_G1_S_SPECIFIC_TRANSCRIPTION	11	0.584891	1.28345	0.193059	1	1	1212	tags=64%, list=24%, signal=49%	RRM2/CDC6/E2F1/CDC25A/E2F5/CCNA1/FBXO5
REACTOME_NUCLEOTIDE_BINDING_DOMAIN_LEUCINE_RICH_REPEAT_CONTAINING_RECEPTOR_NLR_SIGNALING_PATHWAYS	REACTOME_NUCLEOTIDE_BINDING_DOMAIN_LEUCINE_RICH_REPEAT_CONTAINING_RECEPTOR_NLR_SIGNALING_PATHWAYS	19	-0.53023	-1.27815	0.188581	1	1	5	tags=11%, list=0%, signal=11%	MAPK11/AIM2
REACTOME_MITOTIC_G1_PHASE_AND_G1_S_TRANSITION	REACTOME_MITOTIC_G1_PHASE_AND_G1_S_TRANSITION	49	0.430382	1.27229	0.155263	1	1	1431	tags=45%, list=28%, signal=33%	PTK6/CCNE2/PSMB9/RRM2/CDC6/E2F1/CDKN2D/LYN/PSMA6/GMNN/CDC25A/E2F5/CCNB1/CCNA1/FBXO5/DBF4/ORC3/CCNH/CKS1B/CCNA2/PSMD12/CDK2
REACTOME_SYNTHESIS_OF_PC	REACTOME_SYNTHESIS_OF_PC	10	-0.598546	-1.26759	0.205776	1	1	727	tags=30%, list=14%, signal=26%	PHOSPHO1/MFSD2A/CHKB
REACTOME_APOPTOSIS	REACTOME_APOPTOSIS	42	0.436525	1.26729	0.167102	1	1	783	tags=19%, list=15%, signal=16%	TP63/PSMB9/BCL2/GAS2/E2F1/PSMA6/CARD8/OMA1
REACTOME_SIGNALING_BY_FGFR	REACTOME_SIGNALING_BY_FGFR	20	-0.515918	-1.25121	0.207018	1	1	602	tags=25%, list=12%, signal=22%	FGFBP3/FLRT1/FGF5/KL/FGF17
REACTOME_GLUCAGON_LIKE_PEPTIDE_1_GLP1_REGULATES_INSULIN_SECRETION	REACTOME_GLUCAGON_LIKE_PEPTIDE_1_GLP1_REGULATES_INSULIN_SECRETION	11	0.569008	1.2486	0.240781	1	1	314	tags=18%, list=6%, signal=17%	KCNG2/GNG11
REACTOME_NEUROTRANSMITTER_RELEASE_CYCLE	REACTOME_NEUROTRANSMITTER_RELEASE_CYCLE	16	-0.538642	-1.2457	0.210896	1	1	251	tags=31%, list=5%, signal=30%	TSPOAP1/LIN7B/SLC18A2/PPFIA2/GAD1
REACTOME_INTEGRIN_SIGNALING	REACTOME_INTEGRIN_SIGNALING	13	-0.566369	-1.24266	0.225141	1	1	798	tags=23%, list=16%, signal=20%	RASGRP1/RAPGEF3/ITGB3
REACTOME_DNA_REPLICATION	REACTOME_DNA_REPLICATION	38	0.436249	1.23866	0.182741	1	1	1643	tags=50%, list=32%, signal=34%	CCNE2/PSMB9/ANAPC15/CDC6/PSMA6/GMNN/GINS2/DNA2/ANAPC4/CCNA1/DBF4/RFC3/ORC3/CCNA2/PSMD12/CDK2/PSMD14/ANAPC10/POLE3
REACTOME_TP53_REGULATES_TRANSCRIPTION_OF_CELL_CYCLE_GENES	REACTOME_TP53_REGULATES_TRANSCRIPTION_OF_CELL_CYCLE_GENES	18	0.506089	1.23746	0.224586	1	1	1761	tags=72%, list=35%, signal=47%	CCNE2/PLAGL1/RGCC/E2F1/AURKA/CDC25C/CCNB1/CCNA1/CCNA2/CDK2/CNOT2/TFDP1/CNOT9
REACTOME_NEGATIVE_REGULATION_OF_NOTCH4_SIGNALING	REACTOME_NEGATIVE_REGULATION_OF_NOTCH4_SIGNALING	15	0.517771	1.23432	0.230942	1	1	641	tags=20%, list=13%, signal=18%	NOTCH4/PSMB9/PSMA6
REACTOME_ANTI_INFLAMMATORY_RESPONSE_FAVOURING_LEISHMANIA_PARASITE_INFECTION	REACTOME_ANTI_INFLAMMATORY_RESPONSE_FAVOURING_LEISHMANIA_PARASITE_INFECTION	18	-0.516161	-1.23306	0.229706	1	1	843	tags=33%, list=17%, signal=28%	ADORA2B/GNG2/ADCY3/GNG7/PRKAR2B/CD3G
REACTOME_MITOCHONDRIAL_TRANSLATION	REACTOME_MITOCHONDRIAL_TRANSLATION	21	0.482534	1.22901	0.220657	1	1	1448	tags=48%, list=28%, signal=34%	MRPL46/TSFM/MRPL23/MRPS9/MRPS22/MRPS26/MRPS10/MRPS18A/MRPL11/MRPL39
REACTOME_SIGNALING_BY_NOTCH1_PEST_DOMAIN_MUTANTS_IN_CANCER	REACTOME_SIGNALING_BY_NOTCH1_PEST_DOMAIN_MUTANTS_IN_CANCER	14	-0.542691	-1.229	0.230216	1	1	938	tags=57%, list=18%, signal=47%	JAG2/HDAC7/HDAC5/DLL4/MAMLD1/MIB2/NOTCH1/HEYL
REACTOME_SIGNAL_TRANSDUCTION_BY_L1	REACTOME_SIGNAL_TRANSDUCTION_BY_L1	12	-0.564349	-1.22543	0.241187	1	1	1368	tags=42%, list=27%, signal=31%	VAV2/L1CAM/ITGA9/NCAM1/ITGB3
REACTOME_BACTERIAL_INFECTION_PATHWAYS	REACTOME_BACTERIAL_INFECTION_PATHWAYS	23	0.471043	1.22164	0.23918	1	1	343	tags=17%, list=7%, signal=16%	STX1B/MRC1/VPS33B/SNAP25
REACTOME_SIGNALING_BY_ALK_IN_CANCER	REACTOME_SIGNALING_BY_ALK_IN_CANCER	15	-0.538175	-1.22143	0.233813	1	1	1158	tags=33%, list=23%, signal=26%	RRBP1/JUN/DCTN1/NOTCH1/ALK
REACTOME_INFECTION_WITH_MYCOBACTERIUM_TUBERCULOSIS	REACTOME_INFECTION_WITH_MYCOBACTERIUM_TUBERCULOSIS	10	0.571125	1.21997	0.272321	1	1	246	tags=20%, list=5%, signal=19%	MRC1/VPS33B
REACTOME_G1_S_DNA_DAMAGE_CHECKPOINTS	REACTOME_G1_S_DNA_DAMAGE_CHECKPOINTS	21	0.476349	1.21326	0.239437	1	1	1809	tags=67%, list=35%, signal=43%	CCNE2/PSMB9/PSMA6/CDC25A/CHEK2/CCNA1/CCNA2/PSMD12/CDK2/MDM4/PSMD14/PHF20/PSMD11/PSMD7
REACTOME_S_PHASE	REACTOME_S_PHASE	50	0.409391	1.21232	0.204244	1	1	1431	tags=42%, list=28%, signal=31%	PTK6/CCNE2/PSMB9/ANAPC15/CDC6/E2F1/PSMA6/GMNN/GINS2/DNA2/ANAPC4/CDC25A/E2F5/CCNA1/RFC3/ORC3/CCNH/CKS1B/CCNA2/PSMD12/CDK2
REACTOME_RRNA_MODIFICATION_IN_THE_NUCLEUS_AND_CYTOSOL	REACTOME_RRNA_MODIFICATION_IN_THE_NUCLEUS_AND_CYTOSOL	19	0.487648	1.20947	0.252358	1	1	56	tags=5%, list=1%, signal=5%	PWP2
REACTOME_G_ALPHA_S_SIGNALLING_EVENTS	REACTOME_G_ALPHA_S_SIGNALLING_EVENTS	40	-0.431231	-1.20741	0.188312	1	1	669	tags=35%, list=13%, signal=31%	ADORA2B/PTGER2/P2RY11/GNG2/PDE4A/ADCY3/PTH1R/GNG7/CALCR/PRKAR2B/GPR176/MC1R/PTHLH/DRD1
REACTOME_SYNTHESIS_OF_DNA	REACTOME_SYNTHESIS_OF_DNA	37	0.429999	1.20647	0.205128	1	1	1643	tags=49%, list=32%, signal=33%	CCNE2/PSMB9/ANAPC15/CDC6/PSMA6/GMNN/GINS2/DNA2/ANAPC4/CCNA1/RFC3/ORC3/CCNA2/PSMD12/CDK2/PSMD14/ANAPC10/POLE3
REACTOME_G_ALPHA_Q_SIGNALLING_EVENTS	REACTOME_G_ALPHA_Q_SIGNALLING_EVENTS	54	-0.411777	-1.20446	0.179775	1	1	798	tags=30%, list=16%, signal=25%	RASGRP1/AVPR1A/LPAR3/P2RY11/GNG2/BDKRB2/CASR/DGKI/GNG7/GRM1/ARHGEF25/NMB/DGKG/GPR17/NMUR1/UTS2B
REACTOME_TRANSCRIPTIONAL_AND_POST_TRANSLATIONAL_REGULATION_OF_MITF_M_EXPRESSION_AND_ACTIVITY	REACTOME_TRANSCRIPTIONAL_AND_POST_TRANSLATIONAL_REGULATION_OF_MITF_M_EXPRESSION_AND_ACTIVITY	13	-0.548643	-1.20376	0.253283	1	1	790	tags=38%, list=15%, signal=33%	SOX2/TFEB/AKT3/PAX3/MC1R
REACTOME_METABOLISM_OF_NUCLEOTIDES	REACTOME_METABOLISM_OF_NUCLEOTIDES	33	0.43846	1.20267	0.2225	1	1	416	tags=12%, list=8%, signal=11%	CDA/XDH/AK5/RRM2
REACTOME_CELL_CELL_JUNCTION_ORGANIZATION	REACTOME_CELL_CELL_JUNCTION_ORGANIZATION	18	0.491691	1.20226	0.260047	1	1	297	tags=17%, list=6%, signal=16%	PRDM8/CLDN11/CDH8
REACTOME_REGULATION_OF_BETA_CELL_DEVELOPMENT	REACTOME_REGULATION_OF_BETA_CELL_DEVELOPMENT	15	-0.528999	-1.20061	0.253597	1	1	1148	tags=47%, list=22%, signal=36%	GCK/PDX1/MAMLD1/NOTCH1/AKT3/NKX2-2/ONECUT1
REACTOME_DISEASES_OF_MITOTIC_CELL_CYCLE	REACTOME_DISEASES_OF_MITOTIC_CELL_CYCLE	11	0.546031	1.19818	0.284165	1	1	830	tags=36%, list=16%, signal=31%	CCNE2/ANAPC15/E2F1/ANAPC4
REACTOME_PEPTIDE_LIGAND_BINDING_RECEPTORS	REACTOME_PEPTIDE_LIGAND_BINDING_RECEPTORS	36	0.429207	1.19643	0.214834	1	1	398	tags=28%, list=8%, signal=26%	CXCR6/CCR3/XCL1/CXCL6/EDNRB/NTSR1/CXCL1/F2RL2/KISS1/GAL
REACTOME_NUCLEAR_RECEPTOR_TRANSCRIPTION_PATHWAY	REACTOME_NUCLEAR_RECEPTOR_TRANSCRIPTION_PATHWAY	14	-0.528148	-1.19606	0.269784	1	1	427	tags=21%, list=8%, signal=20%	RORB/NR2E1/ESR1
REACTOME_SIGNALING_BY_INTERLEUKINS	REACTOME_SIGNALING_BY_INTERLEUKINS	108	0.357118	1.19554	0.175342	1	1	723	tags=17%, list=14%, signal=15%	TNF/IL12A/NOD2/IL15/IL18R1/CXCL1/PSMB9/RAG1/SNAP25/BCL2/IL18/EBI3/LYN/PSMA6/IRAK2/IL17RB/CD36/LGALS9
REACTOME_MITF_M_REGULATED_MELANOCYTE_DEVELOPMENT	REACTOME_MITF_M_REGULATED_MELANOCYTE_DEVELOPMENT	32	-0.444241	-1.18925	0.226131	1	1	837	tags=28%, list=16%, signal=24%	PPARGC1A/SMARCA2/SOX2/TFEB/AKT3/MLPH/PAX3/MC1R/MLANA
REACTOME_INTERLEUKIN_12_FAMILY_SIGNALING	REACTOME_INTERLEUKIN_12_FAMILY_SIGNALING	11	0.54076	1.18661	0.295011	1	1	465	tags=18%, list=9%, signal=17%	IL12A/EBI3
REACTOME_CROSSLINKING_OF_COLLAGEN_FIBRILS	REACTOME_CROSSLINKING_OF_COLLAGEN_FIBRILS	11	-0.551312	-1.18169	0.279113	1	1	783	tags=36%, list=15%, signal=31%	COL4A6/TLL2/COL1A2/COL4A4
REACTOME_PI_METABOLISM	REACTOME_PI_METABOLISM	25	-0.459183	-1.17822	0.253913	1	1	686	tags=52%, list=13%, signal=45%	TNFAIP8L1/PI4KB/SBF1/INPPL1/INPP4B/INPP5D/PLEKHA6/PIK3CD/GDPD3/PLEKHA4/INPP5J/PIK3R5/PLEKHA2
REACTOME_G_ALPHA_12_13_SIGNALLING_EVENTS	REACTOME_G_ALPHA_12_13_SIGNALLING_EVENTS	18	-0.49311	-1.17799	0.279793	1	1	656	tags=17%, list=13%, signal=15%	GNG2/GNG7/ARHGEF6
REACTOME_MHC_CLASS_II_ANTIGEN_PRESENTATION	REACTOME_MHC_CLASS_II_ANTIGEN_PRESENTATION	30	-0.44502	-1.17648	0.264151	1	1	148	tags=13%, list=3%, signal=13%	KIF20A/KIF26A/TUBB1/HLA-DOA
REACTOME_SEPARATION_OF_SISTER_CHROMATIDS	REACTOME_SEPARATION_OF_SISTER_CHROMATIDS	53	0.38898	1.17531	0.244156	1	1	641	tags=21%, list=13%, signal=18%	AURKB/TUBA3D/CENPM/PSMB9/ANAPC15/PTTG1/CENPU/CENPS/CDC20/CENPQ/PSMA6
REACTOME_SWITCHING_OF_ORIGINS_TO_A_POST_REPLICATIVE_STATE	REACTOME_SWITCHING_OF_ORIGINS_TO_A_POST_REPLICATIVE_STATE	31	0.430615	1.16755	0.263682	1	1	1570	tags=45%, list=31%, signal=31%	CCNE2/PSMB9/ANAPC15/CDC6/PSMA6/GMNN/ANAPC4/CCNA1/ORC3/CCNA2/PSMD12/CDK2/PSMD14/ANAPC10
REACTOME_ASSEMBLY_AND_CELL_SURFACE_PRESENTATION_OF_NMDA_RECEPTORS	REACTOME_ASSEMBLY_AND_CELL_SURFACE_PRESENTATION_OF_NMDA_RECEPTORS	10	-0.55039	-1.1656	0.305054	1	1	251	tags=40%, list=5%, signal=38%	KIF17/LIN7B/GRIN3A/TUBB1
REACTOME_SIGNALING_BY_NOTCH1	REACTOME_SIGNALING_BY_NOTCH1	19	-0.482616	-1.16337	0.283737	1	1	938	tags=32%, list=18%, signal=26%	DLL4/MAMLD1/MIB2/NOTCH1/DTX1/HEYL
REACTOME_SIGNALING_BY_VEGF	REACTOME_SIGNALING_BY_VEGF	28	-0.446706	-1.16282	0.281834	1	1	1695	tags=43%, list=33%, signal=29%	NRP1/SH2D2A/PRKCZ/THEM4/VAV2/PRKCA/VAV3/MAPK11/AKT3/PAK3/VEGFC/ITGB3
REACTOME_UPTAKE_AND_ACTIONS_OF_BACTERIAL_TOXINS	REACTOME_UPTAKE_AND_ACTIONS_OF_BACTERIAL_TOXINS	11	0.529868	1.16271	0.310195	1	1	343	tags=18%, list=7%, signal=17%	STX1B/SNAP25
REACTOME_NGF_STIMULATED_TRANSCRIPTION	REACTOME_NGF_STIMULATED_TRANSCRIPTION	11	-0.541452	-1.16056	0.295749	1	1	625	tags=36%, list=12%, signal=32%	EGR1/CDK5R1/SH3GL3/FOSB
REACTOME_SPHINGOLIPID_DE_NOVO_BIOSYNTHESIS	REACTOME_SPHINGOLIPID_DE_NOVO_BIOSYNTHESIS	15	0.48508	1.15639	0.309417	1	1	1545	tags=60%, list=30%, signal=42%	DEGS2/CERS1/FA2H/SPTSSA/PRKD1/CERS5/CERS4/ORMDL2/CYB5B
REACTOME_RAB_GERANYLGERANYLATION	REACTOME_RAB_GERANYLGERANYLATION	26	-0.446634	-1.14994	0.286972	1	1	622	tags=23%, list=12%, signal=20%	RAB24/RAB19/RAB36/RAB39B/RAB41/RAB40A
REACTOME_REGULATION_OF_RUNX2_EXPRESSION_AND_ACTIVITY	REACTOME_REGULATION_OF_RUNX2_EXPRESSION_AND_ACTIVITY	19	-0.475551	-1.14634	0.311419	1	1	13	tags=11%, list=0%, signal=11%	PPARGC1A/ESR1
REACTOME_INTERFERON_GAMMA_SIGNALING	REACTOME_INTERFERON_GAMMA_SIGNALING	28	-0.439039	-1.14286	0.303905	1	1	365	tags=14%, list=7%, signal=13%	NCAM1/VCAM1/GBP4/TRIM29
REACTOME_DNA_DAMAGE_BYPASS	REACTOME_DNA_DAMAGE_BYPASS	16	0.474965	1.1398	0.323326	1	1	193	tags=12%, list=4%, signal=12%	UBA7/PCLAF
REACTOME_MITOTIC_SPINDLE_CHECKPOINT	REACTOME_MITOTIC_SPINDLE_CHECKPOINT	36	0.408607	1.13901	0.276215	1	1	1063	tags=33%, list=21%, signal=27%	AURKB/CENPM/ANAPC15/CENPU/CENPS/CDC20/CENPQ/ANAPC4/CENPL/PLK1/ZWILCH/ZWINT
REACTOME_SIGNALING_BY_FGFR_IN_DISEASE	REACTOME_SIGNALING_BY_FGFR_IN_DISEASE	12	-0.524225	-1.1383	0.332096	1	1	274	tags=50%, list=5%, signal=47%	BCR/FGFR3/STAT1/GTF2F1/FGF5/FGF17
REACTOME_SPHINGOLIPID_METABOLISM	REACTOME_SPHINGOLIPID_METABOLISM	42	-0.403992	-1.13805	0.274637	1	1	226	tags=12%, list=4%, signal=11%	ENPP7/ARSG/ST8SIA5/B4GALNT1/ST6GALNAC6
REACTOME_SIGNALING_BY_NUCLEAR_RECEPTORS	REACTOME_SIGNALING_BY_NUCLEAR_RECEPTORS	59	-0.383315	-1.13487	0.274016	1	1	527	tags=17%, list=10%, signal=15%	GPS2/GNG2/AKT3/GNG7/PDK4/CYP26B1/FOSB/RDH16/DHRS9/ESR1
REACTOME_REGULATION_OF_MITF_M_DEPENDENT_GENES_INVOLVED_IN_PIGMENTATION	REACTOME_REGULATION_OF_MITF_M_DEPENDENT_GENES_INVOLVED_IN_PIGMENTATION	10	-0.534063	-1.13102	0.348375	1	1	1141	tags=40%, list=22%, signal=31%	DPF3/SMARCA2/MLPH/MLANA
REACTOME_CYTOKINE_SIGNALING_IN_IMMUNE_SYSTEM	REACTOME_CYTOKINE_SIGNALING_IN_IMMUNE_SYSTEM	191	0.307549	1.1281	0.189415	1	1	654	tags=17%, list=13%, signal=15%	TNF/IL12A/NOD2/HLA-DQB1/TUBA3D/BST2/TNFRSF11A/IL15/UBA7/IL18R1/KPNA7/CXCL1/TNFRSF18/PSMB9/HLA-G/IFITM2/RAG1/SNAP25/MT2A/BCL2/TNFRSF14/IL18/LTB/TNFSF13/EBI3/HERC5/CIITA/CENPS/LYN/PSMA6/IRAK2/IL17RB
REACTOME_VEGFR2_MEDIATED_VASCULAR_PERMEABILITY	REACTOME_VEGFR2_MEDIATED_VASCULAR_PERMEABILITY	10	-0.532101	-1.12687	0.350181	1	1	1384	tags=50%, list=27%, signal=37%	THEM4/VAV2/VAV3/AKT3/PAK3
REACTOME_SIGNALING_BY_RETINOIC_ACID	REACTOME_SIGNALING_BY_RETINOIC_ACID	18	-0.471027	-1.12524	0.331606	1	1	375	tags=22%, list=7%, signal=21%	PDK4/CYP26B1/RDH16/DHRS9
REACTOME_NEUROTRANSMITTER_RECEPTORS_AND_POSTSYNAPTIC_SIGNAL_TRANSMISSION	REACTOME_NEUROTRANSMITTER_RECEPTORS_AND_POSTSYNAPTIC_SIGNAL_TRANSMISSION	54	-0.383593	-1.12202	0.306581	1	1	656	tags=28%, list=13%, signal=24%	GNG2/KCNJ2/ADCY3/CHRNA7/GNG7/PPM1E/CHRNA3/PRKAR2B/LIN7B/GRIN3A/CAMKK1/MAPT/TUBB1/GABRQ/GABRB1
REACTOME_CYCLIN_A_CDK2_ASSOCIATED_EVENTS_AT_S_PHASE_ENTRY	REACTOME_CYCLIN_A_CDK2_ASSOCIATED_EVENTS_AT_S_PHASE_ENTRY	31	0.412969	1.11971	0.31592	1	1	1532	tags=45%, list=30%, signal=32%	PTK6/CCNE2/PSMB9/E2F1/PSMA6/CDC25A/E2F5/CCNA1/CCNH/CKS1B/CCNA2/PSMD12/CDK2/PSMD14
REACTOME_SIGNALING_BY_INSULIN_RECEPTOR	REACTOME_SIGNALING_BY_INSULIN_RECEPTOR	18	-0.468011	-1.11803	0.33506	1	1	274	tags=17%, list=5%, signal=16%	FGF5/KL/FGF17
REACTOME_GPCR_LIGAND_BINDING	REACTOME_GPCR_LIGAND_BINDING	92	-0.35306	-1.11691	0.267516	1	1	670	tags=34%, list=13%, signal=30%	FZD9/P2RY11/GNG2/NPW/SSTR2/BDKRB2/HCAR1/OPRD1/CASR/PLPPR3/PTH1R/WNT3/GNG7/GRM1/WNT10B/GALR2/SSTR5/ACKR1/GPR55/CALCR/C5AR1/NMB/GPR17/PLPPR4/MC1R/HTR1B/NMUR1/PTHLH/TAS2R14/DRD1/UTS2B
REACTOME_ION_HOMEOSTASIS	REACTOME_ION_HOMEOSTASIS	12	-0.514029	-1.11616	0.359926	1	1	662	tags=42%, list=13%, signal=36%	SLC8A2/RYR2/ATP2A1/RYR1/CASQ1
REACTOME_EXTRA_NUCLEAR_ESTROGEN_SIGNALING	REACTOME_EXTRA_NUCLEAR_ESTROGEN_SIGNALING	20	-0.457254	-1.10894	0.352632	1	1	656	tags=20%, list=13%, signal=17%	GNG2/AKT3/GNG7/ESR1
REACTOME_CA2_PATHWAY	REACTOME_CA2_PATHWAY	17	0.457366	1.10625	0.359629	1	1	720	tags=24%, list=14%, signal=20%	PDE6G/GNG11/WNT11/TCF7
REACTOME_CELLULAR_RESPONSES_TO_STIMULI	REACTOME_CELLULAR_RESPONSES_TO_STIMULI	168	0.306493	1.10481	0.240793	1	1	598	tags=11%, list=12%, signal=10%	CASTOR1/IGFBP1/TUBA3D/ATP6V1G2/PTK6/CCNE2/HSPA6/HMGA2/PSMB9/ANAPC15/RPS10/MT2A/BCL2/DNAJA4/NOX4/E2F1/CDKN2D/WTIP
REACTOME_NEURONAL_SYSTEM	REACTOME_NEURONAL_SYSTEM	123	-0.334737	-1.10231	0.273006	1	1	656	tags=28%, list=13%, signal=25%	GNG2/KCNMB3/KCNJ2/KCNK3/KCNH8/ADCY3/NRXN3/KCNB2/TSPOAP1/NLGN1/CHRNA7/GNG7/GRM1/SLITRK2/KCNC1/PPM1E/KCND2/CHRNA3/BEGAIN/PRKAR2B/LIN7B/GRIN3A/CAMKK1/MAPT/TUBB1/SLC6A3/SLC18A2/GABRQ/KCNH1/GABRB1/PPFIA2/SLITRK1/GAD1/SYT12
REACTOME_NOTCH1_INTRACELLULAR_DOMAIN_REGULATES_TRANSCRIPTION	REACTOME_NOTCH1_INTRACELLULAR_DOMAIN_REGULATES_TRANSCRIPTION	11	-0.513539	-1.10073	0.356747	1	1	867	tags=55%, list=17%, signal=45%	HDAC7/HDAC5/TLE3/MAMLD1/NOTCH1/HEYL
REACTOME_PROGRAMMED_CELL_DEATH	REACTOME_PROGRAMMED_CELL_DEATH	52	0.365344	1.09857	0.324675	1	1	783	tags=19%, list=15%, signal=16%	TP63/PSMB9/BCL2/IL18/GAS2/E2F1/RIPK3/PSMA6/CARD8/OMA1
REACTOME_SIGNALING_BY_FGFR2	REACTOME_SIGNALING_BY_FGFR2	13	-0.499288	-1.09548	0.362101	1	1	602	tags=23%, list=12%, signal=20%	FGFBP3/FGF5/FGF17
REACTOME_TRANSPORT_OF_SMALL_MOLECULES	REACTOME_TRANSPORT_OF_SMALL_MOLECULES	209	-0.31575	-1.09486	0.270062	1	1	672	tags=19%, list=13%, signal=17%	RHBG/SLC8A2/GNG2/ABCB4/RYR2/TRPV4/BEST4/AQP10/SLC9A2/ADCY3/SLC30A8/SLC38A4/CP/GNG7/SLC15A3/ATP13A4/DERL3/TTYH2/SLC34A3/CLCNKB/SLC15A2/SLC7A3/ATP2A1/SLC14A2/SLC9B1/BEST1/SLC4A4/PRKAR2B/RYR1/ASIC3/CASQ1/CES3/ABCC11/SLC6A3/SLC18A2/ATP10B/SLC6A7/TRPV5/SLC28A3/ABCA8
REACTOME_HATS_ACETYLATE_HISTONES	REACTOME_HATS_ACETYLATE_HISTONES	26	-0.424829	-1.09381	0.366197	1	1	166	tags=12%, list=3%, signal=11%	BRD1/PAX3/ATXN7
REACTOME_ARACHIDONIC_ACID_METABOLISM	REACTOME_ARACHIDONIC_ACID_METABOLISM	12	-0.502551	-1.09124	0.38961	1	1	571	tags=42%, list=11%, signal=37%	CYP2U1/PTGR2/PTGIS/ALOX12/ALOX5AP
REACTOME_O_GLYCOSYLATION_OF_TSR_DOMAIN_CONTAINING_PROTEINS	REACTOME_O_GLYCOSYLATION_OF_TSR_DOMAIN_CONTAINING_PROTEINS	13	-0.494453	-1.08487	0.375235	1	1	1322	tags=46%, list=26%, signal=34%	ADAMTS18/ADAMTS10/THSD4/THSD7B/ADAMTS14/ADAMTS6
REACTOME_TRANSPORT_OF_BILE_SALTS_AND_ORGANIC_ACIDS_METAL_IONS_AND_AMINE_COMPOUNDS	REACTOME_TRANSPORT_OF_BILE_SALTS_AND_ORGANIC_ACIDS_METAL_IONS_AND_AMINE_COMPOUNDS	30	-0.408608	-1.08021	0.379074	1	1	789	tags=33%, list=15%, signal=28%	SLC22A15/SLC39A8/SLC39A1/RHBG/SLC30A8/CP/SLC14A2/SLC6A3/SLC18A2/SLC6A7
REACTOME_SIGNALING_BY_ERBB4	REACTOME_SIGNALING_BY_ERBB4	14	-0.476422	-1.07892	0.381295	1	1	123	tags=21%, list=2%, signal=21%	GABRQ/GABRB1/ESR1
REACTOME_RHOD_GTPASE_CYCLE	REACTOME_RHOD_GTPASE_CYCLE	14	-0.4745	-1.07457	0.388489	1	1	81	tags=14%, list=2%, signal=14%	DIAPH2/FILIP1
REACTOME_TRANS_GOLGI_NETWORK_VESICLE_BUDDING	REACTOME_TRANS_GOLGI_NETWORK_VESICLE_BUDDING	17	0.443677	1.07314	0.38051	1	1	406	tags=18%, list=8%, signal=16%	TXNDC5/AP4B1/BLOC1S1
REACTOME_COSTIMULATION_BY_THE_CD28_FAMILY	REACTOME_COSTIMULATION_BY_THE_CD28_FAMILY	15	-0.472201	-1.0717	0.392086	1	1	527	tags=27%, list=10%, signal=24%	AKT3/PAK3/GRAP2/CD3G
REACTOME_MAPK6_MAPK4_SIGNALING	REACTOME_MAPK6_MAPK4_SIGNALING	20	-0.441526	-1.0708	0.396491	1	1	415	tags=10%, list=8%, signal=9%	PAK3/CDC42EP5
REACTOME_METAL_ION_SLC_TRANSPORTERS	REACTOME_METAL_ION_SLC_TRANSPORTERS	10	0.500793	1.06973	0.401786	1	1	484	tags=30%, list=9%, signal=27%	SLC30A2/SLC39A4/SLC30A10
REACTOME_TRANSPORT_OF_VITAMINS_NUCLEOSIDES_AND_RELATED_MOLECULES	REACTOME_TRANSPORT_OF_VITAMINS_NUCLEOSIDES_AND_RELATED_MOLECULES	10	-0.504807	-1.06907	0.391697	1	1	29	tags=20%, list=1%, signal=20%	SLC35A1/SLC28A3
REACTOME_STABILIZATION_OF_P53	REACTOME_STABILIZATION_OF_P53	15	0.447035	1.06569	0.387892	1	1	1809	tags=60%, list=35%, signal=39%	PSMB9/PSMA6/CHEK2/PSMD12/MDM4/PSMD14/PHF20/PSMD11/PSMD7
REACTOME_NUCLEAR_SIGNALING_BY_ERBB4	REACTOME_NUCLEAR_SIGNALING_BY_ERBB4	10	0.498833	1.06555	0.404018	1	1	238	tags=30%, list=5%, signal=29%	NRG4/GFAP/BTC
REACTOME_PKMTS_METHYLATE_HISTONE_LYSINES	REACTOME_PKMTS_METHYLATE_HISTONE_LYSINES	11	-0.494633	-1.0602	0.408503	1	1	1660	tags=55%, list=33%, signal=37%	EHMT2/SETD1A/EHMT1/DOT1L/SETDB2/PRDM16
REACTOME_PEPTIDE_HORMONE_METABOLISM	REACTOME_PEPTIDE_HORMONE_METABOLISM	27	0.399193	1.05974	0.391509	1	1	347	tags=11%, list=7%, signal=10%	CPB2/GIP/ACE2
REACTOME_SIALIC_ACID_METABOLISM	REACTOME_SIALIC_ACID_METABOLISM	14	-0.466227	-1.05583	0.410072	1	1	304	tags=21%, list=6%, signal=20%	ST8SIA4/ST8SIA5/ST6GALNAC6
REACTOME_TELOMERE_MAINTENANCE	REACTOME_TELOMERE_MAINTENANCE	14	0.452561	1.05424	0.401345	1	1	1557	tags=64%, list=31%, signal=45%	DNA2/CHTF18/CCNA1/RFC3/POLR2G/TINF2/CCNA2/CDK2/PPP6C
REACTOME_CELL_CELL_COMMUNICATION	REACTOME_CELL_CELL_COMMUNICATION	30	-0.398297	-1.05296	0.42024	1	1	107	tags=20%, list=2%, signal=20%	KIRREL2/MAGI2/CDH13/HEYL/NPHS1/ARHGEF6
REACTOME_TRANSLATION	REACTOME_TRANSLATION	55	0.350174	1.04747	0.380054	1	1	1329	tags=35%, list=26%, signal=26%	SARS2/RPS10/MRPL46/TSFM/SRP19/EIF3C/MRPL23/RPL17/MRPS9/MRPS22/MRPS26/MRPS10/SRPRB/N6AMT1/RPL29/MRPS18A/CARS2/MRPL11/TRAM1
REACTOME_MAPK_FAMILY_SIGNALING_CASCADES	REACTOME_MAPK_FAMILY_SIGNALING_CASCADES	81	-0.336138	-1.0466	0.388626	1	1	415	tags=12%, list=8%, signal=12%	PAK3/NCAM1/FGF5/ANGPT1/KL/SPTBN4/FGF17/ITGB3/GFRA2/CDC42EP5
REACTOME_SIGNALING_BY_WNT	REACTOME_SIGNALING_BY_WNT	70	0.329357	1.04393	0.373057	1	1	324	tags=9%, list=6%, signal=8%	PDE6G/HECW1/WNT7A/PSMB9/GNG11/RNF43
REACTOME_CELL_CYCLE_CHECKPOINTS	REACTOME_CELL_CYCLE_CHECKPOINTS	86	0.323134	1.04337	0.361111	1	1	1443	tags=40%, list=28%, signal=29%	AURKB/CCNE2/CENPM/PSMB9/ANAPC15/CENPU/CDC6/CENPS/CDC20/RMI2/CENPQ/PSMA6/DNA2/ANAPC4/CENPL/RMI1/PLK1/CDC25A/CHEK2/ZWILCH/RHNO1/CDC25C/ZWINT/CCNB1/CCNA1/DBF4/RFC3/ORC3/CCNA2/PSMD12/CCNB2/CDK2/MDM4/HUS1
REACTOME_SLC_MEDIATED_TRANSMEMBRANE_TRANSPORT	REACTOME_SLC_MEDIATED_TRANSMEMBRANE_TRANSPORT	72	-0.345695	-1.04259	0.382353	1	1	731	tags=25%, list=14%, signal=22%	SLC39A1/SLC15A1/RHBG/SLC8A2/SLC9A2/SLC30A8/SLC38A4/CP/SLC15A3/SLC34A3/SLC15A2/SLC7A3/SLC14A2/SLC4A4/SLC6A3/SLC18A2/SLC6A7/SLC28A3
REACTOME_DOWNSTREAM_SIGNALING_EVENTS_OF_B_CELL_RECEPTOR_BCR	REACTOME_DOWNSTREAM_SIGNALING_EVENTS_OF_B_CELL_RECEPTOR_BCR	20	0.41237	1.04156	0.425926	1	1	641	tags=15%, list=13%, signal=13%	RASGRP3/PSMB9/PSMA6
REACTOME_HEMOSTASIS	REACTOME_HEMOSTASIS	174	-0.305402	-1.04055	0.371295	1	1	662	tags=16%, list=13%, signal=14%	SLC8A2/GNG2/KCNMB3/KIF19/RAPGEF3/COL1A2/KIF20A/DGKI/GNG7/F8/ANGPT2/SELL/MPL/ATP2A1/VEGFC/KIF18B/CFD/DGKG/PRKAR2B/VPREB3/ANGPT1/ITGA10/PIK3R5/KIF26A/TUBB1/ITGB3/JAM2
REACTOME_ADHERENS_JUNCTIONS_INTERACTIONS	REACTOME_ADHERENS_JUNCTIONS_INTERACTIONS	12	0.45801	1.03641	0.436285	1	1	297	tags=17%, list=6%, signal=16%	PRDM8/CDH8
REACTOME_METABOLISM_OF_STEROIDS	REACTOME_METABOLISM_OF_STEROIDS	49	0.350589	1.03641	0.4	1	1	514	tags=10%, list=10%, signal=9%	STARD6/TSPO/HSD3B7/BAAT/STARD5
REACTOME_RESOLUTION_OF_SISTER_CHROMATID_COHESION	REACTOME_RESOLUTION_OF_SISTER_CHROMATID_COHESION	37	0.368413	1.03367	0.410256	1	1	627	tags=19%, list=12%, signal=17%	AURKB/TUBA3D/CENPM/CENPU/CENPS/CDC20/CENPQ
REACTOME_RHOA_GTPASE_CYCLE	REACTOME_RHOA_GTPASE_CYCLE	42	-0.366938	-1.03367	0.426494	1	1	1446	tags=40%, list=28%, signal=29%	MCF2L/ARAP1/ARHGAP19/VAV2/ARHGAP18/ARHGAP31/PLEKHG3/KALRN/GMIP/VAV3/ARHGAP24/ARHGAP6/ARHGAP4/ARHGEF28/FMNL3/ARHGEF25/ARHGAP11A
REACTOME_G_ALPHA_I_SIGNALLING_EVENTS	REACTOME_G_ALPHA_I_SIGNALLING_EVENTS	68	-0.343195	-1.03208	0.420032	1	1	742	tags=34%, list=15%, signal=29%	PTGDR2/LPAR3/GNG2/NPW/SSTR2/BDKRB2/HCAR1/RGS10/PDE4A/OPRD1/CASR/ADCY3/GNG7/GALR2/SSTR5/GPR55/C5AR1/PRKAR2B/GPR17/CAMKK1/HTR1B/NMUR1/TAS2R14
REACTOME_PHOSPHOLIPID_METABOLISM	REACTOME_PHOSPHOLIPID_METABOLISM	62	-0.345793	-1.03172	0.424483	1	1	1398	tags=32%, list=27%, signal=24%	INPPL1/GPD1L/PGS1/INPP4B/INPP5D/PLA2R1/PITPNM1/PLB1/PNPLA2/PLEKHA6/PHOSPHO1/PIK3CD/GDPD3/PLEKHA4/INPP5J/MFSD2A/CHKB/ETNPPL/PIK3R5/PLEKHA2
REACTOME_NEGATIVE_REGULATION_OF_THE_PI3K_AKT_NETWORK	REACTOME_NEGATIVE_REGULATION_OF_THE_PI3K_AKT_NETWORK	24	-0.407206	-1.03164	0.448944	1	1	527	tags=29%, list=10%, signal=26%	PIK3CD/AKT3/IRAK4/FGF5/KL/FGF17/ESR1
REACTOME_DNA_REPLICATION_PRE_INITIATION	REACTOME_DNA_REPLICATION_PRE_INITIATION	30	0.377668	1.02895	0.436754	1	1	2064	tags=60%, list=40%, signal=36%	PSMB9/ANAPC15/CDC6/PSMA6/GMNN/ANAPC4/DBF4/ORC3/PSMD12/CDK2/PSMD14/ANAPC10/POLE3/PSMD11/PSMD7/CDC23/PSMC1/RPA2
REACTOME_ADORA2B_MEDIATED_ANTI_INFLAMMATORY_CYTOKINES_PRODUCTION	REACTOME_ADORA2B_MEDIATED_ANTI_INFLAMMATORY_CYTOKINES_PRODUCTION	12	-0.472521	-1.02603	0.458256	1	1	843	tags=42%, list=17%, signal=35%	ADORA2B/GNG2/ADCY3/GNG7/PRKAR2B
REACTOME_SENSORY_PROCESSING_OF_SOUND_BY_OUTER_HAIR_CELLS_OF_THE_COCHLEA	REACTOME_SENSORY_PROCESSING_OF_SOUND_BY_OUTER_HAIR_CELLS_OF_THE_COCHLEA	15	0.429111	1.02296	0.439462	1	1	451	tags=27%, list=9%, signal=24%	USH1G/ATP2B2/CDH23/KCNN2
REACTOME_TRANSCRIPTIONAL_REGULATION_BY_TP53	REACTOME_TRANSCRIPTIONAL_REGULATION_BY_TP53	117	0.303146	1.02286	0.380682	1	1	22	tags=2%, list=0%, signal=2%	TP63/AURKB
REACTOME_EARLY_SARS_COV_2_INFECTION_EVENTS	REACTOME_EARLY_SARS_COV_2_INFECTION_EVENTS	13	-0.465919	-1.02226	0.448405	1	1	643	tags=38%, list=13%, signal=34%	GPC4/AGRN/GPC2/GPC5/CHMP4A
REACTOME_SELECTIVE_AUTOPHAGY	REACTOME_SELECTIVE_AUTOPHAGY	27	0.384758	1.02142	0.445755	1	1	141	tags=7%, list=3%, signal=7%	TOMM5/TUBA3D
REACTOME_MAP2K_AND_MAPK_ACTIVATION	REACTOME_MAP2K_AND_MAPK_ACTIVATION	15	-0.4497	-1.02063	0.456835	1	1	130	tags=20%, list=3%, signal=20%	ARAF/KSR1/ITGB3
REACTOME_CHOLESTEROL_BIOSYNTHESIS	REACTOME_CHOLESTEROL_BIOSYNTHESIS	13	0.436408	1.0205	0.460554	1	1	1422	tags=54%, list=28%, signal=39%	GGPS1/ARV1/HSD17B7/IDI1/ACAT2/SC5D/MSMO1
REACTOME_PLATELET_HOMEOSTASIS	REACTOME_PLATELET_HOMEOSTASIS	21	0.399795	1.01828	0.450704	1	1	552	tags=29%, list=11%, signal=26%	ATP2B2/PDE2A/GNG11/PDE1A/KCNMB4/PDE11A
REACTOME_GASTRULATION	REACTOME_GASTRULATION	31	0.37543	1.01793	0.447761	1	1	720	tags=23%, list=14%, signal=20%	NOG/MESP2/PSMB9/OSR1/TFAP2C/PSMA6/TCF7
REACTOME_DEATH_RECEPTOR_SIGNALING	REACTOME_DEATH_RECEPTOR_SIGNALING	40	0.354335	1.01782	0.411917	1	1	6	tags=2%, list=0%, signal=3%	TNF
REACTOME_EPH_EPHRIN_SIGNALING	REACTOME_EPH_EPHRIN_SIGNALING	25	-0.395983	-1.01606	0.45913	1	1	1368	tags=36%, list=27%, signal=26%	VAV2/EPHB6/KALRN/EPHA6/VAV3/ARHGEF28/EPHB3/MYH14/PAK3
REACTOME_CELLULAR_RESPONSE_TO_HYPOXIA	REACTOME_CELLULAR_RESPONSE_TO_HYPOXIA	14	0.435853	1.01532	0.439462	1	1	2029	tags=64%, list=40%, signal=39%	PSMB9/WTIP/PSMA6/PSMD12/PSMD14/PSMD11/PSMD7/UBE2D3/PSMC1
REACTOME_SENSORY_PERCEPTION	REACTOME_SENSORY_PERCEPTION	60	0.335276	1.01429	0.404826	1	1	480	tags=20%, list=9%, signal=18%	OR2A42/PDE6G/HSD17B6/USH1G/ATP2B2/SLC17A8/CACNB2/SNAP25/CDH23/KCNN2/ANO2/RAB3A
REACTOME_TRANSCRIPTIONAL_REGULATION_BY_RUNX2	REACTOME_TRANSCRIPTIONAL_REGULATION_BY_RUNX2	30	-0.383662	-1.01427	0.457976	1	1	527	tags=10%, list=10%, signal=9%	AKT3/MMP13/ESR1
REACTOME_INTRACELLULAR_SIGNALING_BY_SECOND_MESSENGERS	REACTOME_INTRACELLULAR_SIGNALING_BY_SECOND_MESSENGERS	79	-0.328338	-1.01388	0.436102	1	1	552	tags=13%, list=11%, signal=11%	ADCY3/AKT3/IRAK4/FGF5/PRKAR2B/KL/FGF17/CAMKK1/NR2E1/ESR1
REACTOME_BETA_CATENIN_INDEPENDENT_WNT_SIGNALING	REACTOME_BETA_CATENIN_INDEPENDENT_WNT_SIGNALING	40	0.352772	1.01333	0.42228	1	1	720	tags=15%, list=14%, signal=13%	PDE6G/PSMB9/GNG11/PSMA6/WNT11/TCF7
REACTOME_INSULIN_PROCESSING	REACTOME_INSULIN_PROCESSING	10	-0.478121	-1.01255	0.447653	1	1	1374	tags=50%, list=27%, signal=37%	PCSK1/EXOC1/PCSK2/KIF5C/SLC30A8
REACTOME_MITOTIC_METAPHASE_AND_ANAPHASE	REACTOME_MITOTIC_METAPHASE_AND_ANAPHASE	67	0.321514	1.012	0.404639	1	1	1074	tags=28%, list=21%, signal=23%	AURKB/TUBA3D/CENPM/PSMB9/ANAPC15/PTTG1/CENPU/CENPS/CDC20/CENPQ/PSMA6/VRK1/ANAPC4/CENPL/PLK1/ZWILCH/CHMP6/ZWINT/CCNB1
REACTOME_COMPLEMENT_CASCADE	REACTOME_COMPLEMENT_CASCADE	15	-0.445834	-1.01186	0.469424	1	1	306	tags=33%, list=6%, signal=31%	C5AR1/CFB/CFD/C4B/C4BPB
REACTOME_VISUAL_PHOTOTRANSDUCTION	REACTOME_VISUAL_PHOTOTRANSDUCTION	28	-0.388574	-1.0115	0.47708	1	1	338	tags=25%, list=7%, signal=23%	GPC2/PDE6A/GPC5/BCO1/AKR1B10/RDH16/DHRS9
REACTOME_EXTENSION_OF_TELOMERES	REACTOME_EXTENSION_OF_TELOMERES	13	0.432055	1.01032	0.469083	1	1	1557	tags=62%, list=31%, signal=43%	DNA2/CHTF18/CCNA1/RFC3/TINF2/CCNA2/CDK2/PPP6C
REACTOME_GPER1_SIGNALING	REACTOME_GPER1_SIGNALING	13	-0.460047	-1.00938	0.470919	1	1	656	tags=31%, list=13%, signal=27%	GNG2/ADCY3/GNG7/PRKAR2B
REACTOME_DISEASES_ASSOCIATED_WITH_GLYCOSAMINOGLYCAN_METABOLISM	REACTOME_DISEASES_ASSOCIATED_WITH_GLYCOSAMINOGLYCAN_METABOLISM	14	-0.44545	-1.00878	0.471223	1	1	643	tags=50%, list=13%, signal=44%	GPC4/CHST6/AGRN/GPC2/BGN/GPC5/CSPG5
REACTOME_DISEASES_OF_SIGNAL_TRANSDUCTION_BY_GROWTH_FACTOR_RECEPTORS_AND_SECOND_MESSENGERS	REACTOME_DISEASES_OF_SIGNAL_TRANSDUCTION_BY_GROWTH_FACTOR_RECEPTORS_AND_SECOND_MESSENGERS	113	-0.310519	-1.00824	0.453271	1	1	274	tags=7%, list=5%, signal=7%	FGF5/KREMEN2/KL/FGF17/ITGB3/HEYL/ALK/ESR1
REACTOME_GLUCAGON_SIGNALING_IN_METABOLIC_REGULATION	REACTOME_GLUCAGON_SIGNALING_IN_METABOLIC_REGULATION	10	-0.475663	-1.00735	0.456679	1	1	656	tags=40%, list=13%, signal=35%	GNG2/ADCY3/GNG7/PRKAR2B
REACTOME_CONSTITUTIVE_SIGNALING_BY_ABERRANT_PI3K_IN_CANCER	REACTOME_CONSTITUTIVE_SIGNALING_BY_ABERRANT_PI3K_IN_CANCER	16	-0.435566	-1.00732	0.476274	1	1	274	tags=25%, list=5%, signal=24%	FGF5/KL/FGF17/ESR1
REACTOME_ESR_MEDIATED_SIGNALING	REACTOME_ESR_MEDIATED_SIGNALING	39	-0.360522	-1.00717	0.467427	1	1	656	tags=13%, list=13%, signal=11%	GNG2/AKT3/GNG7/FOSB/ESR1
REACTOME_CHROMATIN_MODIFYING_ENZYMES	REACTOME_CHROMATIN_MODIFYING_ENZYMES	58	-0.339662	-1.00667	0.460568	1	1	1422	tags=31%, list=28%, signal=23%	SETD1A/SGF29/EHMT1/KDM4B/ARID4A/PHF2/CHD3/ARID5B/KDM4C/DOT1L/BRD1/SETDB2/SMARCA2/GPS2/PRDM16/PADI2/PAX3/ATXN7
REACTOME_SLC_TRANSPORTER_DISORDERS	REACTOME_SLC_TRANSPORTER_DISORDERS	33	0.366365	1.00491	0.47	1	1	237	tags=15%, list=5%, signal=15%	SLC3A1/SLC2A9/SLC17A8/GCKR/SLC39A4
REACTOME_PI3K_AKT_SIGNALING_IN_CANCER	REACTOME_PI3K_AKT_SIGNALING_IN_CANCER	25	-0.391414	-1.00433	0.483478	1	1	274	tags=24%, list=5%, signal=23%	PIK3CD/AKT3/FGF5/KL/FGF17/ESR1
REACTOME_CLASS_B_2_SECRETIN_FAMILY_RECEPTORS	REACTOME_CLASS_B_2_SECRETIN_FAMILY_RECEPTORS	24	0.382094	0.998858	0.458525	1	1	314	tags=29%, list=6%, signal=28%	WNT7A/PTCH2/FZD10/CALCRL/GIP/GIPR/GNG11
REACTOME_SRP_DEPENDENT_COTRANSLATIONAL_PROTEIN_TARGETING_TO_MEMBRANE	REACTOME_SRP_DEPENDENT_COTRANSLATIONAL_PROTEIN_TARGETING_TO_MEMBRANE	13	0.426397	0.997087	0.484009	1	1	1329	tags=46%, list=26%, signal=34%	RPS10/SRP19/RPL17/SRPRB/RPL29/TRAM1
REACTOME_SARS_COV_1_INFECTION	REACTOME_SARS_COV_1_INFECTION	28	0.373824	0.995535	0.48184	1	1	1030	tags=39%, list=20%, signal=32%	BST2/RPS10/ACE2/ST3GAL4/RIPK3/NPIPB3/IRAK2/SERPINE1/PYCARD/CHMP6/PARP16
REACTOME_GENE_SILENCING_BY_RNA	REACTOME_GENE_SILENCING_BY_RNA	20	0.39404	0.995264	0.479167	1	1	1311	tags=40%, list=26%, signal=30%	TDRD12/MYBL1/PLD6/TDRKH/BCDIN3D/PRKRA/POLR2G/NUP88
REACTOME_SYNTHESIS_OF_SUBSTRATES_IN_N_GLYCAN_BIOSYTHESIS	REACTOME_SYNTHESIS_OF_SUBSTRATES_IN_N_GLYCAN_BIOSYTHESIS	22	-0.403042	-0.994059	0.496429	1	1	304	tags=18%, list=6%, signal=17%	FUOM/ST8SIA4/ST8SIA5/ST6GALNAC6
REACTOME_TRANSPORT_OF_INORGANIC_CATIONS_ANIONS_AND_AMINO_ACIDS_OLIGOPEPTIDES	REACTOME_TRANSPORT_OF_INORGANIC_CATIONS_ANIONS_AND_AMINO_ACIDS_OLIGOPEPTIDES	27	-0.382396	-0.993711	0.50173	1	1	731	tags=33%, list=14%, signal=29%	SLC15A1/SLC8A2/SLC9A2/SLC38A4/SLC15A3/SLC34A3/SLC15A2/SLC7A3/SLC4A4
REACTOME_NETRIN_1_SIGNALING	REACTOME_NETRIN_1_SIGNALING	10	-0.468828	-0.992871	0.478339	1	1	1727	tags=70%, list=34%, signal=46%	NTN4/UNC5B/RGMB/UNC5C/SLIT1/UNC5D/NTN1
REACTOME_CLASS_A_1_RHODOPSIN_LIKE_RECEPTORS	REACTOME_CLASS_A_1_RHODOPSIN_LIKE_RECEPTORS	65	-0.33113	-0.992382	0.497623	1	1	843	tags=38%, list=17%, signal=33%	ADORA2B/PTGER2/AVPR1A/PTGDR2/LPAR3/P2RY11/NPW/SSTR2/BDKRB2/HCAR1/OPRD1/PLPPR3/GALR2/SSTR5/ACKR1/GPR55/C5AR1/NMB/GPR17/PLPPR4/MC1R/HTR1B/NMUR1/DRD1/UTS2B
REACTOME_RAC1_GTPASE_CYCLE	REACTOME_RAC1_GTPASE_CYCLE	46	-0.344093	-0.990763	0.4816	1	1	1446	tags=33%, list=28%, signal=24%	MCF2L/ARAP1/NISCH/VAV2/TAOK3/ARHGAP31/PLEKHG3/KALRN/GMIP/VAV3/ARHGAP24/ARHGAP4/PAK3/ARHGEF25/ARHGEF6
REACTOME_REGULATION_OF_PTEN_GENE_TRANSCRIPTION	REACTOME_REGULATION_OF_PTEN_GENE_TRANSCRIPTION	22	-0.401326	-0.989827	0.503571	1	1	1754	tags=45%, list=34%, signal=30%	CBX6/MTA2/CBX2/HDAC7/HDAC5/RRAGD/CHD3/EGR1/JUN/NR2E1
REACTOME_RHO_GTPASES_ACTIVATE_FORMINS	REACTOME_RHO_GTPASES_ACTIVATE_FORMINS	39	0.345336	0.982125	0.479381	1	1	627	tags=18%, list=12%, signal=16%	AURKB/TUBA3D/CENPM/CENPU/CENPS/CDC20/CENPQ
REACTOME_NEUTROPHIL_DEGRANULATION	REACTOME_NEUTROPHIL_DEGRANULATION	117	0.290682	0.980808	0.491477	1	1	583	tags=15%, list=11%, signal=13%	CDA/BST2/TXNDC5/HSPA6/HP/CXCL1/ABCA13/CD177/FGL2/CHI3L1/ALDH3B1/SNAP25/NAPRT/GLIPR1/RAB3A/ATP8B4/PLAU
REACTOME_CELL_CYCLE_MITOTIC	REACTOME_CELL_CYCLE_MITOTIC	150	0.275836	0.979862	0.462428	1	1	1111	tags=27%, list=22%, signal=21%	AURKB/TUBA3D/PTK6/CCNE2/CENPM/PSMB9/ANAPC15/CDK11A/PTTG1/RRM2/CENPU/HAUS8/CDC6/E2F1/CENPS/CDKN2D/CDC20/HAUS1/LYN/CENPQ/PSMA6/GMNN/VRK1/GINS2/DNA2/ANAPC4/HAUS5/CENPL/PLK1/AURKA/CDC25A/E2F5/NME7/ZWILCH/CHMP6/CDC25C/ZWINT/CCNB1/CNEP1R1/CCNA1
REACTOME_OPIOID_SIGNALLING	REACTOME_OPIOID_SIGNALLING	27	-0.376113	-0.977384	0.510381	1	1	656	tags=22%, list=13%, signal=19%	GNG2/PDE4A/ADCY3/GNG7/PRKAR2B/CAMKK1
REACTOME_PKR_MEDIATED_SIGNALING	REACTOME_PKR_MEDIATED_SIGNALING	21	-0.397069	-0.976598	0.520833	1	1	366	tags=14%, list=7%, signal=13%	FANCB/MAPT/TUBB1
REACTOME_PLATELET_AGGREGATION_PLUG_FORMATION	REACTOME_PLATELET_AGGREGATION_PLUG_FORMATION	20	-0.402376	-0.975848	0.507018	1	1	982	tags=30%, list=19%, signal=24%	ADRA2A/RASGRP1/RAPGEF3/COL1A2/MPL/ITGB3
REACTOME_ADAPTIVE_IMMUNE_SYSTEM	REACTOME_ADAPTIVE_IMMUNE_SYSTEM	180	-0.285877	-0.975437	0.52126	1	1	861	tags=18%, list=17%, signal=15%	MIB2/RAP1GAP2/FBXO27/RASGRP1/FBXL8/FBXL7/CD160/FBXO4/PIK3CD/RAPGEF3/SIPA1/COL1A2/KIF20A/AKT3/RNF144B/KLHL11/SELL/ZBTB16/PAK3/NCR3LG1/ASB14/GRAP2/ASB16/VCAM1/TLR1/COLEC12/KIF26A/TUBB1/FBXL13/CD3G/S100A1/HLA-DOA
REACTOME_NONHOMOLOGOUS_END_JOINING_NHEJ	REACTOME_NONHOMOLOGOUS_END_JOINING_NHEJ	10	-0.460568	-0.975378	0.5	1	1	841	tags=20%, list=16%, signal=17%	ABRAXAS1/NHEJ1
REACTOME_HCMV_INFECTION	REACTOME_HCMV_INFECTION	20	-0.401761	-0.974357	0.507018	1	1	165	tags=15%, list=3%, signal=15%	GPS2/CHMP4A/TUBB1
REACTOME_SIGNALING_BY_THE_B_CELL_RECEPTOR_BCR	REACTOME_SIGNALING_BY_THE_B_CELL_RECEPTOR_BCR	26	0.366416	0.974233	0.495392	1	1	641	tags=15%, list=13%, signal=14%	RASGRP3/PSMB9/LYN/PSMA6
REACTOME_KINESINS	REACTOME_KINESINS	18	-0.406428	-0.970914	0.537133	1	1	652	tags=28%, list=13%, signal=24%	KIF19/KIF20A/KIF18B/KIF26A/TUBB1
REACTOME_SIGNALING_BY_MODERATE_KINASE_ACTIVITY_BRAF_MUTANTS	REACTOME_SIGNALING_BY_MODERATE_KINASE_ACTIVITY_BRAF_MUTANTS	15	-0.425151	-0.964916	0.521583	1	1	130	tags=27%, list=3%, signal=26%	ARAF/KSR1/MAP3K11/ITGB3
REACTOME_RRNA_PROCESSING	REACTOME_RRNA_PROCESSING	46	0.328924	0.962883	0.501326	1	1	885	tags=15%, list=17%, signal=13%	PWP2/NOL12/RPS10/TFB1M/RPP38/RCL1/RPL17
REACTOME_NUCLEAR_EVENTS_KINASE_AND_TRANSCRIPTION_FACTOR_ACTIVATION	REACTOME_NUCLEAR_EVENTS_KINASE_AND_TRANSCRIPTION_FACTOR_ACTIVATION	22	-0.390216	-0.962426	0.542857	1	1	884	tags=27%, list=17%, signal=23%	EGR1/MAPK11/MEF2C/CDK5R1/SH3GL3/FOSB
REACTOME_STIMULI_SENSING_CHANNELS	REACTOME_STIMULI_SENSING_CHANNELS	36	-0.348285	-0.961856	0.509002	1	1	615	tags=31%, list=12%, signal=27%	RYR2/TRPV4/BEST4/TTYH2/CLCNKB/SLC9B1/BEST1/RYR1/ASIC3/CASQ1/TRPV5
REACTOME_DEPOSITION_OF_NEW_CENPA_CONTAINING_NUCLEOSOMES_AT_THE_CENTROMERE	REACTOME_DEPOSITION_OF_NEW_CENPA_CONTAINING_NUCLEOSOMES_AT_THE_CENTROMERE	15	0.403059	0.960856	0.524664	1	1	892	tags=40%, list=17%, signal=33%	CENPM/CENPU/CENPW/CENPS/CENPQ/CENPL
REACTOME_SIGNALING_BY_RHO_GTPASES_MIRO_GTPASES_AND_RHOBTB3	REACTOME_SIGNALING_BY_RHO_GTPASES_MIRO_GTPASES_AND_RHOBTB3	173	-0.282308	-0.960524	0.54375	1	1	1487	tags=31%, list=29%, signal=22%	NUP133/PRKCZ/RHOBTB2/MCF2L/ARAP1/GFOD1/ARHGAP19/NISCH/VAV2/PRAG1/ARHGAP18/TAOK3/ARHGAP31/RHOF/RND1/PLEKHG3/HGS/CENPN/KALRN/PRKCA/MAP3K11/KDM4C/GMIP/VAV3/DIAPH2/ARHGAP24/KIF18A/CENPI/KNTC1/INCENP/SYDE1/MAPK11/UBXN11/ARHGAP6/ARHGAP4/ARHGEF28/SH3PXD2A/WDR91/MYLK/MYH14/FMNL3/PAK3/KNL1/ARHGEF25/ARHGAP11A/CCDC187/ZNF512B/LIN7B/NUF2/TUBB1/FILIP1/CDC42EP5/ARHGEF6
REACTOME_NUCLEAR_ENVELOPE_NE_REASSEMBLY	REACTOME_NUCLEAR_ENVELOPE_NE_REASSEMBLY	19	-0.398176	-0.959823	0.543253	1	1	165	tags=11%, list=3%, signal=10%	CHMP4A/TUBB1
REACTOME_SCF_BETA_TRCP_MEDIATED_DEGRADATION_OF_EMI1	REACTOME_SCF_BETA_TRCP_MEDIATED_DEGRADATION_OF_EMI1	16	0.399827	0.959488	0.524249	1	1	1809	tags=50%, list=35%, signal=32%	PSMB9/CDC20/PSMA6/FBXO5/PSMD12/PSMD14/PSMD11/PSMD7
REACTOME_BIOSYNTHESIS_OF_THE_N_GLYCAN_PRECURSOR_DOLICHOL_LIPID_LINKED_OLIGOSACCHARIDE_LLO_AND_TRANSFER_TO_A_NASCENT_PROTEIN	REACTOME_BIOSYNTHESIS_OF_THE_N_GLYCAN_PRECURSOR_DOLICHOL_LIPID_LINKED_OLIGOSACCHARIDE_LLO_AND_TRANSFER_TO_A_NASCENT_PROTEIN	26	-0.371414	-0.956278	0.556338	1	1	304	tags=15%, list=6%, signal=15%	FUOM/ST8SIA4/ST8SIA5/ST6GALNAC6
REACTOME_METABOLISM_OF_CARBOHYDRATES	REACTOME_METABOLISM_OF_CARBOHYDRATES	91	0.292824	0.955146	0.548649	1	1	298	tags=9%, list=6%, signal=8%	PFKFB1/CHST5/SLC37A2/HAS1/UST/GCKR/LUM/PRPS2
REACTOME_PHASE_I_FUNCTIONALIZATION_OF_COMPOUNDS	REACTOME_PHASE_I_FUNCTIONALIZATION_OF_COMPOUNDS	29	-0.360999	-0.947766	0.546075	1	1	1006	tags=31%, list=20%, signal=25%	CYP51A1/CYP2U1/ACSS1/CYP7B1/PTGIS/CYP2D6/CYP27B1/CYP26B1/CES3
REACTOME_FACTORS_INVOLVED_IN_MEGAKARYOCYTE_DEVELOPMENT_AND_PLATELET_PRODUCTION	REACTOME_FACTORS_INVOLVED_IN_MEGAKARYOCYTE_DEVELOPMENT_AND_PLATELET_PRODUCTION	40	-0.337806	-0.945826	0.550325	1	1	652	tags=15%, list=13%, signal=13%	KIF19/KIF20A/KIF18B/PRKAR2B/KIF26A/TUBB1
REACTOME_ORC1_REMOVAL_FROM_CHROMATIN	REACTOME_ORC1_REMOVAL_FROM_CHROMATIN	23	0.3646	0.945579	0.553531	1	1	1809	tags=48%, list=35%, signal=31%	PSMB9/CDC6/PSMA6/CCNA1/ORC3/CCNA2/PSMD12/CDK2/PSMD14/PSMD11/PSMD7
REACTOME_METABOLISM_OF_POLYAMINES	REACTOME_METABOLISM_OF_POLYAMINES	18	0.383385	0.937433	0.550827	1	1	2029	tags=61%, list=40%, signal=37%	PSMB9/PSMA6/OAZ3/PSMD12/PSMD14/OAZ2/PSMD11/PSMD7/SRM/PAOX/PSMC1
REACTOME_SIGNALING_BY_NOTCH4	REACTOME_SIGNALING_BY_NOTCH4	21	0.367777	0.936725	0.546948	1	1	659	tags=19%, list=13%, signal=17%	NOTCH4/PSMB9/PSMA6/HEY1
REACTOME_DAG_AND_IP3_SIGNALING	REACTOME_DAG_AND_IP3_SIGNALING	12	-0.430235	-0.934212	0.573284	1	1	552	tags=25%, list=11%, signal=22%	ADCY3/PRKAR2B/CAMKK1
REACTOME_NOD1_2_SIGNALING_PATHWAY	REACTOME_NOD1_2_SIGNALING_PATHWAY	13	0.399387	0.933927	0.547974	1	1	645	tags=15%, list=13%, signal=13%	NOD2/IRAK2
REACTOME_ION_CHANNEL_TRANSPORT	REACTOME_ION_CHANNEL_TRANSPORT	52	-0.321581	-0.931746	0.573744	1	1	615	tags=27%, list=12%, signal=24%	RYR2/TRPV4/BEST4/ATP13A4/TTYH2/CLCNKB/ATP2A1/SLC9B1/BEST1/RYR1/ASIC3/CASQ1/ATP10B/TRPV5
REACTOME_HCMV_LATE_EVENTS	REACTOME_HCMV_LATE_EVENTS	13	-0.423552	-0.929306	0.574109	1	1	165	tags=23%, list=3%, signal=22%	NUP133/NUP93/CHMP4A
REACTOME_REGULATION_OF_ENDOGENOUS_RETROELEMENTS_BY_PIWI_INTERACTING_RNAS_PIRNAS	REACTOME_REGULATION_OF_ENDOGENOUS_RETROELEMENTS_BY_PIWI_INTERACTING_RNAS_PIRNAS	11	-0.433468	-0.929101	0.556377	1	1	1253	tags=45%, list=25%, signal=34%	MTA2/CHD3/DPF3/SMARCA2/SPOCD1
REACTOME_CELL_JUNCTION_ORGANIZATION	REACTOME_CELL_JUNCTION_ORGANIZATION	25	-0.361346	-0.927182	0.591304	1	1	107	tags=12%, list=2%, signal=12%	CDH13/HEYL/ARHGEF6
REACTOME_ISG15_ANTIVIRAL_MECHANISM	REACTOME_ISG15_ANTIVIRAL_MECHANISM	22	0.352611	0.919562	0.561086	1	1	512	tags=14%, list=10%, signal=12%	UBA7/KPNA7/HERC5
REACTOME_CA_DEPENDENT_EVENTS	REACTOME_CA_DEPENDENT_EVENTS	12	-0.42302	-0.918544	0.591837	1	1	552	tags=25%, list=11%, signal=22%	ADCY3/PRKAR2B/CAMKK1
REACTOME_INTRA_GOLGI_TRAFFIC	REACTOME_INTRA_GOLGI_TRAFFIC	16	-0.397163	-0.918503	0.58348	1	1	1464	tags=62%, list=29%, signal=45%	COG2/NAPA/SNAP29/CYTH3/NSF/GOSR1/COG1/CYTH1/RAB36/RAB41
REACTOME_DRUG_ADME	REACTOME_DRUG_ADME	32	-0.341741	-0.914857	0.592965	1	1	431	tags=16%, list=8%, signal=14%	ACSM2A/NME2/CYP2D6/UGT2B28/SLC28A3
REACTOME_CELL_CYCLE	REACTOME_CELL_CYCLE	183	0.249164	0.913612	0.677507	1	1	1111	tags=26%, list=22%, signal=21%	AURKB/TUBA3D/PTK6/CCNE2/CENPM/MSH5/PSMB9/ANAPC15/CDK11A/PTTG1/RRM2/CENPU/HAUS8/CENPW/CDC6/E2F1/CENPS/CDKN2D/CDC20/HAUS1/RMI2/LYN/CENPQ/PSMA6/GMNN/VRK1/GINS2/DNA2/ANAPC4/HAUS5/CENPL/RMI1/CHTF18/PLK1/AURKA/CDC25A/HSPA2/E2F5/NME7/CHEK2/ZWILCH/CHMP6/RHNO1/CDC25C/ZWINT/CCNB1/CNEP1R1/CCNA1
REACTOME_CHROMOSOME_MAINTENANCE	REACTOME_CHROMOSOME_MAINTENANCE	29	0.33828	0.910904	0.572115	1	1	1431	tags=48%, list=28%, signal=35%	CENPM/CENPU/CENPW/CENPS/CENPQ/DNA2/CENPL/CHTF18/CCNA1/RFC3/POLR2G/TINF2/CCNA2/CDK2
REACTOME_TRANSCRIPTIONAL_REGULATION_BY_MECP2	REACTOME_TRANSCRIPTIONAL_REGULATION_BY_MECP2	13	0.387648	0.906476	0.588486	1	1	371	tags=23%, list=7%, signal=21%	AURKB/RBFOX1/CAMK4
REACTOME_REGULATION_OF_ENDOGENOUS_RETROELEMENTS	REACTOME_REGULATION_OF_ENDOGENOUS_RETROELEMENTS	21	-0.367944	-0.904965	0.604167	1	1	1754	tags=52%, list=34%, signal=35%	MTA2/EHMT2/MORC2/EHMT1/CHD3/DPF3/ZNF708/ZNF141/SMARCA2/ZNF136/SPOCD1
REACTOME_CYTOCHROME_P450_ARRANGED_BY_SUBSTRATE_TYPE	REACTOME_CYTOCHROME_P450_ARRANGED_BY_SUBSTRATE_TYPE	17	-0.383466	-0.899642	0.611208	1	1	1145	tags=41%, list=22%, signal=32%	CYP51A1/CYP2U1/CYP7B1/PTGIS/CYP2D6/CYP27B1/CYP26B1
REACTOME_NEGATIVE_REGULATORS_OF_DDX58_IFIH1_SIGNALING	REACTOME_NEGATIVE_REGULATORS_OF_DDX58_IFIH1_SIGNALING	10	0.421047	0.899391	0.589286	1	1	512	tags=20%, list=10%, signal=18%	UBA7/HERC5
REACTOME_INTERLEUKIN_1_FAMILY_SIGNALING	REACTOME_INTERLEUKIN_1_FAMILY_SIGNALING	39	0.315722	0.897903	0.615979	1	1	645	tags=15%, list=13%, signal=14%	NOD2/IL18R1/PSMB9/IL18/PSMA6/IRAK2
REACTOME_SIGNALING_BY_BRAF_AND_RAF1_FUSIONS	REACTOME_SIGNALING_BY_BRAF_AND_RAF1_FUSIONS	20	-0.36962	-0.896408	0.610526	1	1	130	tags=15%, list=3%, signal=15%	KSR1/BCL2L11/ITGB3
REACTOME_CELLULAR_SENESCENCE	REACTOME_CELLULAR_SENESCENCE	37	0.318548	0.893766	0.633333	1	1	1593	tags=38%, list=31%, signal=26%	CCNE2/HMGA2/ANAPC15/E2F1/CDKN2D/ANAPC4/CCNA1/RNF2/TINF2/CCNA2/CDK2/MDM4/ANAPC10/RPS6KA1
REACTOME_CHONDROITIN_SULFATE_DERMATAN_SULFATE_METABOLISM	REACTOME_CHONDROITIN_SULFATE_DERMATAN_SULFATE_METABOLISM	21	-0.363282	-0.8935	0.618056	1	1	1413	tags=38%, list=28%, signal=28%	GPC4/XYLT2/AGRN/CHST7/GPC2/BGN/GPC5/CSPG5
REACTOME_MITOCHONDRIAL_PROTEIN_DEGRADATION	REACTOME_MITOCHONDRIAL_PROTEIN_DEGRADATION	22	-0.362052	-0.892962	0.633929	1	1	475	tags=9%, list=9%, signal=8%	STAR/LDHD
REACTOME_DNA_DOUBLE_STRAND_BREAK_REPAIR	REACTOME_DNA_DOUBLE_STRAND_BREAK_REPAIR	45	-0.312123	-0.892669	0.626214	1	1	988	tags=22%, list=19%, signal=18%	BRIP1/FIGNL1/ABRAXAS1/XRCC2/POLQ/EYA1/BRCA2/RAD51AP1/RAD9B/NHEJ1
REACTOME_NS1_MEDIATED_EFFECTS_ON_HOST_PATHWAYS	REACTOME_NS1_MEDIATED_EFFECTS_ON_HOST_PATHWAYS	10	0.417795	0.892444	0.598214	1	1	200	tags=10%, list=4%, signal=10%	KPNA7
REACTOME_UCH_PROTEINASES	REACTOME_UCH_PROTEINASES	17	0.367557	0.889027	0.600928	1	1	1809	tags=53%, list=35%, signal=34%	PSMB9/UCHL3/PSMA6/ACTR5/PSMD12/PSMD14/MBD6/PSMD11/PSMD7
REACTOME_REGULATION_OF_TP53_ACTIVITY_THROUGH_PHOSPHORYLATION	REACTOME_REGULATION_OF_TP53_ACTIVITY_THROUGH_PHOSPHORYLATION	41	0.308781	0.888614	0.614173	1	1	22	tags=2%, list=0%, signal=2%	AURKB
REACTOME_TOLL_LIKE_RECEPTOR_TLR1_TLR2_CASCADE	REACTOME_TOLL_LIKE_RECEPTOR_TLR1_TLR2_CASCADE	42	-0.314843	-0.886915	0.634895	1	1	1111	tags=21%, list=22%, signal=17%	JUN/TLR6/USP18/MAPK11/MEF2C/NLRC5/IRAK4/TLR1/S100A1
REACTOME_PARASITE_INFECTION	REACTOME_PARASITE_INFECTION	14	-0.391379	-0.88633	0.615108	1	1	72	tags=14%, list=1%, signal=14%	VAV3/CD3G
REACTOME_ACTIVATION_OF_THE_PRE_REPLICATIVE_COMPLEX	REACTOME_ACTIVATION_OF_THE_PRE_REPLICATIVE_COMPLEX	12	0.391053	0.884895	0.609071	1	1	1643	tags=50%, list=32%, signal=34%	CDC6/GMNN/DBF4/ORC3/CDK2/POLE3
REACTOME_TRANSCRIPTIONAL_REGULATION_BY_RUNX1	REACTOME_TRANSCRIPTIONAL_REGULATION_BY_RUNX1	38	-0.31762	-0.882639	0.636513	1	1	13	tags=5%, list=0%, signal=5%	SMARCA2/ESR1
REACTOME_DEGRADATION_OF_GLI1_BY_THE_PROTEASOME	REACTOME_DEGRADATION_OF_GLI1_BY_THE_PROTEASOME	13	0.377248	0.882159	0.605544	1	1	1809	tags=46%, list=35%, signal=30%	PSMB9/PSMA6/PSMD12/PSMD14/PSMD11/PSMD7
REACTOME_G_ALPHA_Z_SIGNALLING_EVENTS	REACTOME_G_ALPHA_Z_SIGNALLING_EVENTS	16	0.367353	0.881559	0.60739	1	1	510	tags=25%, list=10%, signal=23%	ADCY4/GNG11/ADRA2C/RGS19
REACTOME_AUTOPHAGY	REACTOME_AUTOPHAGY	43	0.302938	0.881292	0.652742	1	1	141	tags=7%, list=3%, signal=7%	TOMM5/GFAP/TUBA3D
REACTOME_REGULATION_OF_INSULIN_LIKE_GROWTH_FACTOR_IGF_TRANSPORT_AND_UPTAKE_BY_INSULIN_LIKE_GROWTH_FACTOR_BINDING_PROTEINS_IGFBPS	REACTOME_REGULATION_OF_INSULIN_LIKE_GROWTH_FACTOR_IGF_TRANSPORT_AND_UPTAKE_BY_INSULIN_LIKE_GROWTH_FACTOR_BINDING_PROTEINS_IGFBPS	32	0.319632	0.875792	0.651852	1	1	1075	tags=22%, list=21%, signal=17%	IGFBP1/EVA1A/SERPIND1/STC2/AHSG/SERPINC1/KLK13
REACTOME_REGULATION_OF_RAS_BY_GAPS	REACTOME_REGULATION_OF_RAS_BY_GAPS	15	0.366985	0.874859	0.623318	1	1	1809	tags=53%, list=35%, signal=35%	PSMB9/PSMA6/KBTBD7/PSMD12/RASA2/PSMD14/PSMD11/PSMD7
REACTOME_DISEASES_ASSOCIATED_WITH_O_GLYCOSYLATION_OF_PROTEINS	REACTOME_DISEASES_ASSOCIATED_WITH_O_GLYCOSYLATION_OF_PROTEINS	25	-0.340538	-0.87379	0.657391	1	1	1023	tags=32%, list=20%, signal=26%	ADAMTS10/MUC1/THSD4/THSD7B/NOTCH1/ADAMTS14/ADAMTS6/MUC17
REACTOME_TRAFFICKING_OF_AMPA_RECEPTORS	REACTOME_TRAFFICKING_OF_AMPA_RECEPTORS	10	0.408814	0.87326	0.620536	1	1	179	tags=10%, list=4%, signal=10%	CACNG8
REACTOME_ACTIVATION_OF_ANTERIOR_HOX_GENES_IN_HINDBRAIN_DEVELOPMENT_DURING_EARLY_EMBRYOGENESIS	REACTOME_ACTIVATION_OF_ANTERIOR_HOX_GENES_IN_HINDBRAIN_DEVELOPMENT_DURING_EARLY_EMBRYOGENESIS	16	0.36384	0.873127	0.625866	1	1	123	tags=6%, list=2%, signal=6%	RARB
REACTOME_FCERI_MEDIATED_MAPK_ACTIVATION	REACTOME_FCERI_MEDIATED_MAPK_ACTIVATION	10	-0.411722	-0.871934	0.629964	1	1	1368	tags=40%, list=27%, signal=29%	VAV2/JUN/VAV3/GRAP2
REACTOME_RUNX1_REGULATES_TRANSCRIPTION_OF_GENES_INVOLVED_IN_DIFFERENTIATION_OF_HSCS	REACTOME_RUNX1_REGULATES_TRANSCRIPTION_OF_GENES_INVOLVED_IN_DIFFERENTIATION_OF_HSCS	16	0.36296	0.871015	0.632794	1	1	2029	tags=56%, list=40%, signal=34%	PSMB9/PSMA6/CCNH/PSMD12/PSMD14/PSMD11/PSMD7/CBFB/PSMC1
REACTOME_CLEC7A_DECTIN_1_SIGNALING	REACTOME_CLEC7A_DECTIN_1_SIGNALING	24	0.332837	0.870092	0.624424	1	1	2493	tags=71%, list=49%, signal=36%	PSMB9/PSMA6/PYCARD/PSMD12/PSMD14/PSMD11/PSMD7/UBA3/PSMC1/MAP3K14/PSMD10/AHCYL1/CASP8/CUL1/PPP3CB/PRKCD/PSME3
REACTOME_COPI_DEPENDENT_GOLGI_TO_ER_RETROGRADE_TRAFFIC	REACTOME_COPI_DEPENDENT_GOLGI_TO_ER_RETROGRADE_TRAFFIC	27	-0.334692	-0.869744	0.657439	1	1	652	tags=19%, list=13%, signal=16%	KIF19/KIF20A/KIF18B/KIF26A/TUBB1
REACTOME_DEVELOPMENTAL_BIOLOGY	REACTOME_DEVELOPMENTAL_BIOLOGY	264	0.229039	0.869135	0.857567	1	1	340	tags=7%, list=7%, signal=7%	TP63/TNF/NOG/STX1B/LGALS7B/RARB/TUBA3D/KRT23/KRTAP5-1/CACNG8/ARTN/EDNRB/MESP2/PSMB9/CHL1/RPS10/PAX4/CACNB2
REACTOME_SIGNALING_BY_TGFB_FAMILY_MEMBERS	REACTOME_SIGNALING_BY_TGFB_FAMILY_MEMBERS	39	0.305288	0.868228	0.662371	1	1	27	tags=3%, list=1%, signal=3%	NOG
REACTOME_DECTIN_1_MEDIATED_NONCANONICAL_NF_KB_SIGNALING	REACTOME_DECTIN_1_MEDIATED_NONCANONICAL_NF_KB_SIGNALING	16	0.361482	0.867469	0.635104	1	1	2327	tags=69%, list=46%, signal=38%	PSMB9/PSMA6/PSMD12/PSMD14/PSMD11/PSMD7/UBA3/PSMC1/MAP3K14/PSMD10/CUL1
REACTOME_INNATE_IMMUNE_SYSTEM	REACTOME_INNATE_IMMUNE_SYSTEM	249	-0.245028	-0.866654	0.811178	1	1	486	tags=10%, list=10%, signal=10%	BST1/RAB24/TNFRSF1B/SLC2A5/NLRC5/NLRC3/LAT2/SELL/IRAK4/NME2/PAK3/PADI2/GRAP2/C5AR1/CFB/BPIFA1/CFD/C4B/TLR1/MUC17/C4BPB/BPIFB1/CD3G/S100A1/NFAM1/AIM2
REACTOME_INFLUENZA_INFECTION	REACTOME_INFLUENZA_INFECTION	20	0.342889	0.866067	0.636574	1	1	1311	tags=35%, list=26%, signal=26%	KPNA7/RPS10/RPL17/RPL29/GTF2F2/POLR2G/NUP88
REACTOME_FORMATION_OF_FIBRIN_CLOT_CLOTTING_CASCADE	REACTOME_FORMATION_OF_FIBRIN_CLOT_CLOTTING_CASCADE	17	0.357995	0.865898	0.62877	1	1	1226	tags=35%, list=24%, signal=27%	GP1BA/CD177/SERPIND1/SERPINC1/F3/F13A1
REACTOME_RNA_POLYMERASE_II_TRANSCRIPTION	REACTOME_RNA_POLYMERASE_II_TRANSCRIPTION	394	0.219911	0.865848	0.908795	1	1	605	tags=10%, list=12%, signal=9%	TP63/AURKB/TRIM63/ZNF585B/IGFBP1/RUNX2/ZNF233/RARB/NOTCH4/ZNF563/CCNE2/ZNF114/NR4A3/RBFOX1/GP1BA/TNFRSF18/PSMB9/ESR2/ZNF568/ANAPC15/PLAGL1/ZNF333/ZNF530/CAMK4/ZNF215/ZNF285/RRM2/ZNF613/RGCC/ZNF485/ZKSCAN3/ZNF799/ZFP69B/ZNF660/E2F1/ZNF730/TFAP2C/RMI2/ZNF550
REACTOME_RESPIRATORY_SYNCYTIAL_VIRUS_RSV_ATTACHMENT_AND_ENTRY	REACTOME_RESPIRATORY_SYNCYTIAL_VIRUS_RSV_ATTACHMENT_AND_ENTRY	11	-0.403922	-0.865772	0.654344	1	1	1413	tags=36%, list=28%, signal=26%	GPC4/AGRN/GPC2/GPC5
REACTOME_AQUAPORIN_MEDIATED_TRANSPORT	REACTOME_AQUAPORIN_MEDIATED_TRANSPORT	14	-0.382298	-0.865765	0.642086	1	1	656	tags=36%, list=13%, signal=31%	GNG2/AQP10/ADCY3/GNG7/PRKAR2B
REACTOME_RHO_GTPASE_EFFECTORS	REACTOME_RHO_GTPASE_EFFECTORS	69	0.274237	0.865303	0.715385	1	1	627	tags=13%, list=12%, signal=12%	AURKB/WAS/TUBA3D/CENPM/GOPC/CENPU/CENPS/CDC20/CENPQ
REACTOME_INTERFERON_SIGNALING	REACTOME_INTERFERON_SIGNALING	78	-0.280697	-0.863889	0.728868	1	1	397	tags=10%, list=8%, signal=10%	RSAD2/FANCB/NCAM1/VCAM1/MAPT/TUBB1/GBP4/TRIM29
REACTOME_RHOC_GTPASE_CYCLE	REACTOME_RHOC_GTPASE_CYCLE	20	-0.355736	-0.862735	0.668421	1	1	723	tags=55%, list=14%, signal=47%	LBR/BCR/PKN1/ANLN/MCF2L/VAV2/ARHGAP18/ARHGEF28/FMNL3/ARHGEF25/CCDC187
REACTOME_DISEASES_OF_GLYCOSYLATION	REACTOME_DISEASES_OF_GLYCOSYLATION	50	-0.297839	-0.862344	0.6992	1	1	643	tags=16%, list=13%, signal=14%	GPC2/NOTCH1/BGN/GPC5/ADAMTS14/ADAMTS6/CSPG5/MUC17
REACTOME_PHASE_II_CONJUGATION_OF_COMPOUNDS	REACTOME_PHASE_II_CONJUGATION_OF_COMPOUNDS	26	0.32381	0.860951	0.638249	1	1	1158	tags=42%, list=23%, signal=33%	ACSM2B/UGT2B7/SULT1A1/SULT2A1/BPNT1/SLC35B3/GLYATL2/SULT1A2/GSTZ1/N6AMT1/TPST1
REACTOME_FCGAMMA_RECEPTOR_FCGR_DEPENDENT_PHAGOCYTOSIS	REACTOME_FCGAMMA_RECEPTOR_FCGR_DEPENDENT_PHAGOCYTOSIS	22	0.329395	0.859017	0.622172	1	1	619	tags=18%, list=12%, signal=16%	WAS/PLPP4/LYN/PLA2G6
REACTOME_TRANSPORT_TO_THE_GOLGI_AND_SUBSEQUENT_MODIFICATION	REACTOME_TRANSPORT_TO_THE_GOLGI_AND_SUBSEQUENT_MODIFICATION	49	0.290299	0.858177	0.681579	1	1	141	tags=4%, list=3%, signal=4%	ST8SIA6/TUBA3D
REACTOME_NUCLEAR_ENVELOPE_BREAKDOWN	REACTOME_NUCLEAR_ENVELOPE_BREAKDOWN	16	0.357408	0.857692	0.648961	1	1	1751	tags=62%, list=34%, signal=41%	VRK1/PLK1/CCNB1/CNEP1R1/NUP88/CCNB2/SEH1L/TMPO/NEK7/NUP35
REACTOME_SIGNALING_BY_NTRKS	REACTOME_SIGNALING_BY_NTRKS	32	-0.319609	-0.855608	0.680067	1	1	884	tags=16%, list=17%, signal=13%	MAPK11/MEF2C/CDK5R1/SH3GL3/FOSB
REACTOME_G_PROTEIN_MEDIATED_EVENTS	REACTOME_G_PROTEIN_MEDIATED_EVENTS	17	-0.364676	-0.855561	0.660245	1	1	552	tags=18%, list=11%, signal=16%	ADCY3/PRKAR2B/CAMKK1
REACTOME_DISORDERS_OF_TRANSMEMBRANE_TRANSPORTERS	REACTOME_DISORDERS_OF_TRANSMEMBRANE_TRANSPORTERS	57	0.284258	0.854267	0.694823	1	1	270	tags=11%, list=5%, signal=10%	SLC3A1/SLC2A9/SLC17A8/GCKR/SLC39A4/PSMB9
REACTOME_METABOLIC_DISORDERS_OF_BIOLOGICAL_OXIDATION_ENZYMES	REACTOME_METABOLIC_DISORDERS_OF_BIOLOGICAL_OXIDATION_ENZYMES	10	-0.401197	-0.849644	0.65343	1	1	1006	tags=40%, list=20%, signal=32%	CYP2U1/CYP7B1/CYP27B1/CYP26B1
REACTOME_REGULATION_OF_RUNX3_EXPRESSION_AND_ACTIVITY	REACTOME_REGULATION_OF_RUNX3_EXPRESSION_AND_ACTIVITY	14	0.364168	0.848329	0.654709	1	1	2029	tags=57%, list=40%, signal=35%	PSMB9/PSMA6/PSMD12/PSMD14/PSMD11/PSMD7/CBFB/PSMC1
REACTOME_PHASE_0_RAPID_DEPOLARISATION	REACTOME_PHASE_0_RAPID_DEPOLARISATION	10	-0.400542	-0.848256	0.655235	1	1	554	tags=40%, list=11%, signal=36%	FGF12/SCN3B/SCN2A/FGF11
REACTOME_PLATELET_ACTIVATION_SIGNALING_AND_AGGREGATION	REACTOME_PLATELET_ACTIVATION_SIGNALING_AND_AGGREGATION	83	-0.272109	-0.848038	0.748019	1	1	1127	tags=24%, list=22%, signal=19%	PRKCA/P2RY1/MMRN1/VAV3/ADRA2A/TGFB3/SERPINA4/RASGRP1/GNG2/RAPGEF3/COL1A2/DGKI/GNG7/F8/MPL/VEGFC/CFD/DGKG/PIK3R5/ITGB3
REACTOME_DEUBIQUITINATION	REACTOME_DEUBIQUITINATION	65	-0.282483	-0.846589	0.752773	1	1	119	tags=3%, list=2%, signal=3%	ATXN7/ESR1
REACTOME_HOMOLOGOUS_DNA_PAIRING_AND_STRAND_EXCHANGE	REACTOME_HOMOLOGOUS_DNA_PAIRING_AND_STRAND_EXCHANGE	19	-0.350644	-0.845245	0.690311	1	1	988	tags=26%, list=19%, signal=21%	BRIP1/XRCC2/BRCA2/RAD51AP1/RAD9B
REACTOME_PROTEIN_FOLDING	REACTOME_PROTEIN_FOLDING	22	0.322286	0.840478	0.653846	1	1	314	tags=14%, list=6%, signal=13%	TUBA3D/CCNE2/GNG11
REACTOME_ANTIGEN_PROCESSING_CROSS_PRESENTATION	REACTOME_ANTIGEN_PROCESSING_CROSS_PRESENTATION	25	-0.325798	-0.835969	0.685217	1	1	182	tags=8%, list=4%, signal=8%	TLR1/S100A1
REACTOME_MITOTIC_PROMETAPHASE	REACTOME_MITOTIC_PROMETAPHASE	61	0.274521	0.835759	0.747989	1	1	627	tags=15%, list=12%, signal=13%	AURKB/TUBA3D/CENPM/CENPU/HAUS8/CENPS/CDC20/HAUS1/CENPQ
REACTOME_FCERI_MEDIATED_NF_KB_ACTIVATION	REACTOME_FCERI_MEDIATED_NF_KB_ACTIVATION	17	0.342699	0.828902	0.668213	1	1	641	tags=18%, list=13%, signal=15%	PSMB9/LYN/PSMA6
REACTOME_SENESCENCE_ASSOCIATED_SECRETORY_PHENOTYPE_SASP	REACTOME_SENESCENCE_ASSOCIATED_SECRETORY_PHENOTYPE_SASP	16	0.344593	0.826939	0.672055	1	1	1593	tags=50%, list=31%, signal=35%	ANAPC15/CDKN2D/ANAPC4/CCNA1/CCNA2/CDK2/ANAPC10/RPS6KA1
REACTOME_ASPARAGINE_N_LINKED_GLYCOSYLATION	REACTOME_ASPARAGINE_N_LINKED_GLYCOSYLATION	88	-0.261803	-0.825605	0.787167	1	1	665	tags=11%, list=13%, signal=10%	COL7A1/SPTBN5/TRAPPC5/FUOM/F8/ST8SIA4/ST8SIA5/SPTBN4/TUBB1/ST6GALNAC6
REACTOME_SELENOAMINO_ACID_METABOLISM	REACTOME_SELENOAMINO_ACID_METABOLISM	12	0.364804	0.825498	0.673866	1	1	2219	tags=83%, list=43%, signal=47%	RPS10/HNMT/RPL17/RPL29/AHCY/EEF1E1/RPL26/SCLY/CTH/GSR
REACTOME_INTRA_GOLGI_AND_RETROGRADE_GOLGI_TO_ER_TRAFFIC	REACTOME_INTRA_GOLGI_AND_RETROGRADE_GOLGI_TO_ER_TRAFFIC	57	-0.279176	-0.824586	0.762205	1	1	652	tags=12%, list=13%, signal=11%	KIF19/RAB36/KIF20A/KIF18B/RAB41/KIF26A/TUBB1
REACTOME_METABOLISM_OF_AMINO_ACIDS_AND_DERIVATIVES	REACTOME_METABOLISM_OF_AMINO_ACIDS_AND_DERIVATIVES	93	0.25151	0.824487	0.776	1	1	1458	tags=40%, list=29%, signal=29%	CARNS1/AMT/TAT/PSMB9/CKMT1B/RPS10/HPD/SUOX/ACMSD/FMO1/KYNU/CKMT1A/PSMA6/HAL/RIDA/OAZ3/HNMT/RPL17/ACAT1/TDO2/DIO1/GATM/KYAT3/GSTZ1/RPL29/PYCR2/SARDH/DLST/MPST/MCCC2/SLC25A10/PSMD12/HAAO/PSAT1/ASS1/SLC6A11/CGA
REACTOME_O_LINKED_GLYCOSYLATION	REACTOME_O_LINKED_GLYCOSYLATION	39	-0.295008	-0.824144	0.732899	1	1	413	tags=18%, list=8%, signal=17%	MUC1/THSD4/THSD7B/GALNT17/ADAMTS14/ADAMTS6/MUC17
REACTOME_CARGO_RECOGNITION_FOR_CLATHRIN_MEDIATED_ENDOCYTOSIS	REACTOME_CARGO_RECOGNITION_FOR_CLATHRIN_MEDIATED_ENDOCYTOSIS	31	-0.307062	-0.8192	0.735	1	1	381	tags=13%, list=7%, signal=12%	STON1/SH3GL3/REPS2/CD3G
REACTOME_PLASMA_LIPOPROTEIN_ASSEMBLY_REMODELING_AND_CLEARANCE	REACTOME_PLASMA_LIPOPROTEIN_ASSEMBLY_REMODELING_AND_CLEARANCE	19	0.329698	0.817718	0.683962	1	1	404	tags=11%, list=8%, signal=10%	APOBR/CIDEC
REACTOME_CARGO_TRAFFICKING_TO_THE_PERICILIARY_MEMBRANE	REACTOME_CARGO_TRAFFICKING_TO_THE_PERICILIARY_MEMBRANE	17	0.337601	0.81657	0.677494	1	1	1116	tags=35%, list=22%, signal=28%	CYS1/PDE6D/MKKS/INPP5E/BBIP1/EXOC6
REACTOME_METABOLISM_OF_VITAMINS_AND_COFACTORS	REACTOME_METABOLISM_OF_VITAMINS_AND_COFACTORS	66	-0.271478	-0.814371	0.795786	1	1	786	tags=17%, list=15%, signal=14%	PARP10/NMNAT3/GPC2/BST1/PTGIS/ALDH1L1/ACP5/GPC5/BCO1/SLC52A3/AKR1B10
REACTOME_TAK1_DEPENDENT_IKK_AND_NF_KAPPA_B_ACTIVATION	REACTOME_TAK1_DEPENDENT_IKK_AND_NF_KAPPA_B_ACTIVATION	13	0.343469	0.80317	0.69936	1	1	645	tags=15%, list=13%, signal=13%	NOD2/IRAK2
REACTOME_GABA_B_RECEPTOR_ACTIVATION	REACTOME_GABA_B_RECEPTOR_ACTIVATION	11	-0.373429	-0.800414	0.722736	1	1	656	tags=36%, list=13%, signal=32%	GNG2/KCNJ2/ADCY3/GNG7
REACTOME_POST_TRANSLATIONAL_PROTEIN_MODIFICATION	REACTOME_POST_TRANSLATIONAL_PROTEIN_MODIFICATION	415	-0.214647	-0.79872	0.966954	1	1	943	tags=15%, list=18%, signal=13%	USP18/ZRANB1/CCNF/RAB3C/INCENP/RTN4RL2/TFPT/USP37/APOL1/ABRAXAS1/PPARGC1A/FBXO27/CISH/THSD7B/CHGB/FEM1A/DCAF16/FBXL8/COL7A1/FBXL7/VASH2/CUL9/FBXO4/GPLD1/RTN4RL1/SPTBN5/DTL/BST1/TRAPPC5/RAB24/VASH1/RAB19/RAB36/FUOM/ARSG/TECTA/CP/GP2/F8/KLHL11/ZBTB16/RAB39B/GALNT17/ASB14/ADAMTS14/ST8SIA4/ADAMTS6/ASB16/ST8SIA5/SPTBN4/NTNG2/RAB41/RAB40A/TUBB1/TTLL2/ATXN7/LY6G6C/MUC17/FBXL13/CNTN5/ST6GALNAC6/ESR1
REACTOME_VASOPRESSIN_REGULATES_RENAL_WATER_HOMEOSTASIS_VIA_AQUAPORINS	REACTOME_VASOPRESSIN_REGULATES_RENAL_WATER_HOMEOSTASIS_VIA_AQUAPORINS	13	0.34155	0.798682	0.69936	1	1	790	tags=38%, list=15%, signal=33%	AQP1/ADCY4/GNG11/AQP4/RAB11FIP2
REACTOME_LATE_SARS_COV_2_INFECTION_EVENTS	REACTOME_LATE_SARS_COV_2_INFECTION_EVENTS	21	0.312922	0.79701	0.701878	1	1	597	tags=19%, list=12%, signal=17%	ACE2/ANO2/ST3GAL4/ANO7
REACTOME_HEDGEHOG_ON_STATE	REACTOME_HEDGEHOG_ON_STATE	19	0.321304	0.7969	0.714623	1	1	641	tags=16%, list=13%, signal=14%	PTCH2/PSMB9/PSMA6
REACTOME_TCR_SIGNALING	REACTOME_TCR_SIGNALING	25	0.30389	0.7965	0.742389	1	1	641	tags=20%, list=13%, signal=18%	WAS/HLA-DQB1/PSMB9/CD101/PSMA6
REACTOME_KERATINIZATION	REACTOME_KERATINIZATION	10	0.372095	0.794826	0.685268	1	1	171	tags=20%, list=3%, signal=19%	KRT23/KRTAP5-1
REACTOME_GLYCOSAMINOGLYCAN_METABOLISM	REACTOME_GLYCOSAMINOGLYCAN_METABOLISM	42	0.273326	0.793503	0.767624	1	1	267	tags=10%, list=5%, signal=9%	CHST5/HAS1/UST/LUM
REACTOME_DISEASES_OF_METABOLISM	REACTOME_DISEASES_OF_METABOLISM	80	-0.255485	-0.79299	0.842022	1	1	1023	tags=20%, list=20%, signal=16%	MUC1/CYP2U1/THSD4/KHK/CYP7B1/THSD7B/GPC2/NOTCH1/BGN/GPC5/ADAMTS14/CYP27B1/ADAMTS6/CYP26B1/CSPG5/MUC17
REACTOME_SNRNP_ASSEMBLY	REACTOME_SNRNP_ASSEMBLY	12	-0.364418	-0.791296	0.74397	1	1	203	tags=25%, list=4%, signal=24%	NUP133/NUP93/SMN1
REACTOME_CITRIC_ACID_CYCLE_TCA_CYCLE	REACTOME_CITRIC_ACID_CYCLE_TCA_CYCLE	14	0.339586	0.791065	0.710762	1	1	1433	tags=50%, list=28%, signal=36%	ACAT1/SDHD/CSKMT/SDHAF2/DLST/LYRM4/ISCA1
REACTOME_BINDING_AND_UPTAKE_OF_LIGANDS_BY_SCAVENGER_RECEPTORS	REACTOME_BINDING_AND_UPTAKE_OF_LIGANDS_BY_SCAVENGER_RECEPTORS	15	0.331308	0.789809	0.710762	1	1	250	tags=13%, list=5%, signal=13%	SCARA5/HP
REACTOME_NEDDYLATION	REACTOME_NEDDYLATION	76	0.247481	0.788619	0.861702	1	1	376	tags=5%, list=7%, signal=5%	NEURL2/PSMB9/SPSB3/UCHL3
REACTOME_RESOLUTION_OF_D_LOOP_STRUCTURES_THROUGH_SYNTHESIS_DEPENDENT_STRAND_ANNEALING_SDSA	REACTOME_RESOLUTION_OF_D_LOOP_STRUCTURES_THROUGH_SYNTHESIS_DEPENDENT_STRAND_ANNEALING_SDSA	11	-0.36765	-0.788027	0.733826	1	1	988	tags=36%, list=19%, signal=29%	BRIP1/XRCC2/BRCA2/RAD51AP1
REACTOME_BILE_ACID_AND_BILE_SALT_METABOLISM	REACTOME_BILE_ACID_AND_BILE_SALT_METABOLISM	16	0.32808	0.787313	0.722864	1	1	1072	tags=31%, list=21%, signal=25%	HSD3B7/BAAT/STARD5/ABCC3/AKR1C1
REACTOME_REGULATION_OF_EXPRESSION_OF_SLITS_AND_ROBOS	REACTOME_REGULATION_OF_EXPRESSION_OF_SLITS_AND_ROBOS	20	0.311592	0.787018	0.715278	1	1	1847	tags=55%, list=36%, signal=35%	PSMB9/RPS10/PSMA6/RPL17/MAGOH/RPL29/PSMD12/PSMD14/PSMD11/PSMD7/RPL26
REACTOME_SUMOYLATION	REACTOME_SUMOYLATION	44	-0.274353	-0.782659	0.79066	1	1	13	tags=9%, list=0%, signal=9%	L3MBTL2/INCENP/PPARGC1A/ESR1
REACTOME_THROMBIN_SIGNALLING_THROUGH_PROTEINASE_ACTIVATED_RECEPTORS_PARS	REACTOME_THROMBIN_SIGNALLING_THROUGH_PROTEINASE_ACTIVATED_RECEPTORS_PARS	10	0.365413	0.780552	0.712054	1	1	348	tags=20%, list=7%, signal=19%	GNG11/F2RL2
REACTOME_COPI_MEDIATED_ANTEROGRADE_TRANSPORT	REACTOME_COPI_MEDIATED_ANTEROGRADE_TRANSPORT	27	-0.300321	-0.780427	0.764706	1	1	195	tags=11%, list=4%, signal=11%	SPTBN5/SPTBN4/TUBB1
REACTOME_SIGNALING_BY_NOTCH3	REACTOME_SIGNALING_BY_NOTCH3	13	-0.355287	-0.779527	0.744841	1	1	938	tags=46%, list=18%, signal=38%	DLL4/DLGAP5/MAMLD1/MIB2/NOTCH1/HEYL
REACTOME_TOLL_LIKE_RECEPTOR_CASCADES	REACTOME_TOLL_LIKE_RECEPTOR_CASCADES	49	-0.2686	-0.776065	0.827974	1	1	1111	tags=18%, list=22%, signal=15%	JUN/TLR6/USP18/MAPK11/MEF2C/NLRC5/IRAK4/TLR1/S100A1
REACTOME_G2_M_CHECKPOINTS	REACTOME_G2_M_CHECKPOINTS	44	0.265402	0.775874	0.800525	1	1	1443	tags=41%, list=28%, signal=30%	PSMB9/CDC6/RMI2/PSMA6/DNA2/RMI1/CDC25A/CHEK2/RHNO1/CDC25C/CCNB1/DBF4/RFC3/ORC3/PSMD12/CCNB2/CDK2/HUS1
REACTOME_ION_TRANSPORT_BY_P_TYPE_ATPASES	REACTOME_ION_TRANSPORT_BY_P_TYPE_ATPASES	12	-0.356917	-0.775008	0.756957	1	1	454	tags=33%, list=9%, signal=30%	ATP10A/ATP13A4/ATP2A1/ATP10B
REACTOME_HOST_INTERACTIONS_OF_HIV_FACTORS	REACTOME_HOST_INTERACTIONS_OF_HIV_FACTORS	26	0.290863	0.77335	0.767281	1	1	3627	tags=100%, list=71%, signal=29%	PSMB9/PSMA6/NUP88/PSMD12/PSMD14/SEH1L/NUP35/PSMD11/AP1S2/PSMD7/PSMC1/NUP107/PSMD10/NUP62/ATP6V1H/PSME3/PSMD2/AP1B1/AAAS/AP2A2/AP2A1/PSMA2/CDK9/PSMB8/NUP133/NUP93
REACTOME_HDR_THROUGH_HOMOLOGOUS_RECOMBINATION_HRR	REACTOME_HDR_THROUGH_HOMOLOGOUS_RECOMBINATION_HRR	24	-0.304496	-0.771431	0.769366	1	1	988	tags=25%, list=19%, signal=20%	BRIP1/FIGNL1/XRCC2/BRCA2/RAD51AP1/RAD9B
REACTOME_M_PHASE	REACTOME_M_PHASE	104	0.23172	0.77057	0.89589	1	1	1095	tags=23%, list=21%, signal=19%	AURKB/TUBA3D/CENPM/PSMB9/ANAPC15/PTTG1/CENPU/HAUS8/CENPS/CDC20/HAUS1/CENPQ/PSMA6/VRK1/ANAPC4/HAUS5/CENPL/PLK1/NME7/ZWILCH/CHMP6/ZWINT/CCNB1/CNEP1R1
REACTOME_INFECTIOUS_DISEASE	REACTOME_INFECTIOUS_DISEASE	216	0.207901	0.769403	0.971429	1	1	651	tags=12%, list=13%, signal=11%	STX1B/MRC1/WAS/NOD2/TUBA3D/BST2/KPNA7/VPS33B/ADCY4/PSMB9/HLA-G/GNG11/RPS10/SNAP25/ACE2/IL18/FXYD6/ANO2/HERC5/ST3GAL4/RIPK3/NPIPB3/ANO7/LYN/PSMA6/IRAK2/ENTPD1
REACTOME_ASPIRIN_ADME	REACTOME_ASPIRIN_ADME	13	0.328552	0.768288	0.724947	1	1	828	tags=38%, list=16%, signal=32%	ACSM2B/UGT2B7/CYP2C9/ABCC2/GLYATL2
REACTOME_UNFOLDED_PROTEIN_RESPONSE_UPR	REACTOME_UNFOLDED_PROTEIN_RESPONSE_UPR	30	0.281432	0.766756	0.778043	1	1	1508	tags=37%, list=30%, signal=26%	IGFBP1/KDELR3/TATDN2/CREB3L4/WIPI1/SRPRB/ZBTB17/TPP1/GSK3A/DCP2/EXOSC1
REACTOME_NICOTINATE_METABOLISM	REACTOME_NICOTINATE_METABOLISM	14	-0.33617	-0.761302	0.758993	1	1	786	tags=29%, list=15%, signal=24%	PARP10/NMNAT3/BST1/PTGIS
REACTOME_LEISHMANIA_INFECTION	REACTOME_LEISHMANIA_INFECTION	37	-0.272852	-0.759153	0.825163	1	1	656	tags=22%, list=13%, signal=19%	JUN/VAV3/ADORA2B/GNG2/ADCY3/GNG7/PRKAR2B/CD3G
REACTOME_HDACS_DEACETYLATE_HISTONES	REACTOME_HDACS_DEACETYLATE_HISTONES	11	-0.353944	-0.75865	0.761553	1	1	1754	tags=100%, list=34%, signal=66%	HDAC8/RBBP7/RBBP4/KDM1A/MTA3/MTA2/HMG20B/ARID4A/CHD3/GPS2
REACTOME_DISEASES_OF_DNA_REPAIR	REACTOME_DISEASES_OF_DNA_REPAIR	23	-0.302208	-0.757473	0.790409	1	1	1289	tags=35%, list=25%, signal=26%	MSH2/ATRIP/MSH3/BRIP1/XRCC2/BRCA2/RAD51AP1/RAD9B
REACTOME_TRANSCRIPTIONAL_REGULATION_OF_BROWN_AND_BEIGE_ADIPOCYTE_DIFFERENTIATION	REACTOME_TRANSCRIPTIONAL_REGULATION_OF_BROWN_AND_BEIGE_ADIPOCYTE_DIFFERENTIATION	11	-0.353115	-0.756873	0.763401	1	1	1754	tags=45%, list=34%, signal=30%	MTA2/RXRA/CHD3/PPARGC1A/PRDM16
REACTOME_CLASS_I_PEROXISOMAL_MEMBRANE_PROTEIN_IMPORT	REACTOME_CLASS_I_PEROXISOMAL_MEMBRANE_PROTEIN_IMPORT	10	0.353834	0.755819	0.736607	1	1	1909	tags=70%, list=37%, signal=44%	ABCD2/PEX2/PXMP4/ALDH3A2/ABCD3/ATAD1/PEX13
REACTOME_HOMOLOGY_DIRECTED_REPAIR	REACTOME_HOMOLOGY_DIRECTED_REPAIR	35	-0.276571	-0.755468	0.832237	1	1	988	tags=23%, list=19%, signal=19%	BRIP1/FIGNL1/ABRAXAS1/XRCC2/POLQ/BRCA2/RAD51AP1/RAD9B
REACTOME_MITF_M_DEPENDENT_GENE_EXPRESSION	REACTOME_MITF_M_DEPENDENT_GENE_EXPRESSION	21	-0.306972	-0.755004	0.784722	1	1	837	tags=24%, list=16%, signal=20%	DPF3/PPARGC1A/SMARCA2/MLPH/MLANA
REACTOME_AUF1_HNRNP_D0_BINDS_AND_DESTABILIZES_MRNA	REACTOME_AUF1_HNRNP_D0_BINDS_AND_DESTABILIZES_MRNA	13	0.322683	0.754564	0.735608	1	1	1809	tags=46%, list=35%, signal=30%	PSMB9/PSMA6/PSMD12/PSMD14/PSMD11/PSMD7
REACTOME_DEGRADATION_OF_AXIN	REACTOME_DEGRADATION_OF_AXIN	14	0.323222	0.752944	0.753363	1	1	1809	tags=43%, list=35%, signal=28%	PSMB9/PSMA6/PSMD12/PSMD14/PSMD11/PSMD7
REACTOME_CLATHRIN_MEDIATED_ENDOCYTOSIS	REACTOME_CLATHRIN_MEDIATED_ENDOCYTOSIS	39	-0.268759	-0.750814	0.838762	1	1	381	tags=10%, list=7%, signal=10%	STON1/SH3GL3/REPS2/CD3G
REACTOME_SIGNALING_BY_NOTCH	REACTOME_SIGNALING_BY_NOTCH	48	0.254729	0.750306	0.849604	1	1	725	tags=19%, list=14%, signal=16%	FABP7/NOTCH4/PSMB9/DNER/E2F1/ST3GAL4/PSMA6/HEY1/RFNG
REACTOME_PRE_NOTCH_EXPRESSION_AND_PROCESSING	REACTOME_PRE_NOTCH_EXPRESSION_AND_PROCESSING	15	0.313746	0.747942	0.748879	1	1	725	tags=27%, list=14%, signal=23%	NOTCH4/E2F1/ST3GAL4/RFNG
REACTOME_INTERFERON_ALPHA_BETA_SIGNALING	REACTOME_INTERFERON_ALPHA_BETA_SIGNALING	24	0.2859	0.747391	0.790323	1	1	320	tags=12%, list=6%, signal=12%	BST2/HLA-G/IFITM2
REACTOME_HEDGEHOG_OFF_STATE	REACTOME_HEDGEHOG_OFF_STATE	31	-0.279543	-0.745783	0.831667	1	1	641	tags=16%, list=13%, signal=14%	GPR161/ADCY3/IFT172/PRKAR2B/TUBB1
REACTOME_FATTY_ACYL_COA_BIOSYNTHESIS	REACTOME_FATTY_ACYL_COA_BIOSYNTHESIS	12	0.329399	0.745382	0.74514	1	1	1733	tags=50%, list=34%, signal=33%	ACSL6/ELOVL2/ELOVL1/ELOVL7/PPT2/ACSL3
REACTOME_N_GLYCAN_TRIMMING_IN_THE_ER_AND_CALNEXIN_CALRETICULIN_CYCLE	REACTOME_N_GLYCAN_TRIMMING_IN_THE_ER_AND_CALNEXIN_CALRETICULIN_CYCLE	13	0.318209	0.7441	0.742004	1	1	3484	tags=100%, list=68%, signal=32%	TRIM13/RNF139/DERL1/PSMC1/SYVN1/RAD23B/VCP/RNF103/ENGASE/AMFR/NGLY1/OS9/UGGT2
REACTOME_GOLGI_TO_ER_RETROGRADE_TRANSPORT	REACTOME_GOLGI_TO_ER_RETROGRADE_TRANSPORT	37	-0.2671	-0.743151	0.843137	1	1	652	tags=14%, list=13%, signal=12%	KIF19/KIF20A/KIF18B/KIF26A/TUBB1
REACTOME_ER_TO_GOLGI_ANTEROGRADE_TRANSPORT	REACTOME_ER_TO_GOLGI_ANTEROGRADE_TRANSPORT	42	-0.263254	-0.741588	0.859451	1	1	749	tags=14%, list=15%, signal=12%	COL7A1/SPTBN5/TRAPPC5/F8/SPTBN4/TUBB1
REACTOME_INTRAFLAGELLAR_TRANSPORT	REACTOME_INTRAFLAGELLAR_TRANSPORT	13	-0.337767	-0.741086	0.787992	1	1	855	tags=23%, list=17%, signal=19%	KIF17/IFT172/TUBB1
REACTOME_DDX58_IFIH1_MEDIATED_INDUCTION_OF_INTERFERON_ALPHA_BETA	REACTOME_DDX58_IFIH1_MEDIATED_INDUCTION_OF_INTERFERON_ALPHA_BETA	22	0.282213	0.735975	0.789593	1	1	512	tags=9%, list=10%, signal=8%	UBA7/HERC5
REACTOME_SOMITOGENESIS	REACTOME_SOMITOGENESIS	16	0.306612	0.735793	0.759815	1	1	641	tags=19%, list=13%, signal=16%	MESP2/PSMB9/PSMA6
REACTOME_THE_ROLE_OF_GTSE1_IN_G2_M_PROGRESSION_AFTER_G2_CHECKPOINT	REACTOME_THE_ROLE_OF_GTSE1_IN_G2_M_PROGRESSION_AFTER_G2_CHECKPOINT	20	0.291216	0.735551	0.787037	1	1	1563	tags=45%, list=31%, signal=31%	TUBA3D/PSMB9/PSMA6/PLK1/CCNB1/PSMD12/CCNB2/PSMD14/TUBA1B
REACTOME_INTERLEUKIN_3_INTERLEUKIN_5_AND_GM_CSF_SIGNALING	REACTOME_INTERLEUKIN_3_INTERLEUKIN_5_AND_GM_CSF_SIGNALING	10	-0.347213	-0.735319	0.785199	1	1	1398	tags=40%, list=27%, signal=29%	INPPL1/INPP5D/IL3RA/PIK3CD
REACTOME_MTOR_SIGNALLING	REACTOME_MTOR_SIGNALLING	11	-0.342234	-0.73355	0.789279	1	1	3362	tags=100%, list=66%, signal=34%	CAB39L/STRADB/AKT2/LAMTOR3/CAB39/PRKAB1/TSC2/RRAGD/EIF4G1/PRKAA2
REACTOME_AEROBIC_RESPIRATION_AND_RESPIRATORY_ELECTRON_TRANSPORT	REACTOME_AEROBIC_RESPIRATION_AND_RESPIRATORY_ELECTRON_TRANSPORT	56	0.245316	0.733276	0.876033	1	1	1495	tags=39%, list=29%, signal=28%	SIRT4/NDUFAF5/UQCC2/TMEM126A/LDHB/UQCR11/ATP5MC1/NDUFA3/SMIM20/ACAT1/SDHD/GSTZ1/PDHB/CSKMT/SDHAF2/PDHX/HCCS/DLST/LYRM4/SLC25A14/ISCA1/GID4
REACTOME_GLYCEROPHOSPHOLIPID_BIOSYNTHESIS	REACTOME_GLYCEROPHOSPHOLIPID_BIOSYNTHESIS	37	-0.263197	-0.732291	0.856209	1	1	1388	tags=27%, list=27%, signal=20%	GPD1L/PGS1/PLA2R1/PITPNM1/PLB1/PNPLA2/PHOSPHO1/MFSD2A/CHKB/ETNPPL
REACTOME_EUKARYOTIC_TRANSLATION_INITIATION	REACTOME_EUKARYOTIC_TRANSLATION_INITIATION	13	0.313108	0.732172	0.752665	1	1	1155	tags=31%, list=23%, signal=24%	RPS10/EIF3C/RPL17/RPL29
REACTOME_VESICLE_MEDIATED_TRANSPORT	REACTOME_VESICLE_MEDIATED_TRANSPORT	196	-0.213055	-0.73183	0.975	1	1	687	tags=14%, list=13%, signal=12%	PRKAA2/AP4S1/COL7A1/GJB7/SPTBN5/STON1/KIF19/TRAPPC5/RAB36/COL1A2/KIF20A/AKT3/F8/DENND6B/RAB39B/DENND2A/SH3GL3/SCARF1/REPS2/KIF18B/SPTBN4/RAB41/COLEC12/CHMP4A/KIF26A/TUBB1/CD3G
REACTOME_REGULATION_OF_GLUCOKINASE_BY_GLUCOKINASE_REGULATORY_PROTEIN	REACTOME_REGULATION_OF_GLUCOKINASE_BY_GLUCOKINASE_REGULATORY_PROTEIN	10	0.342101	0.730756	0.761161	1	1	232	tags=10%, list=5%, signal=10%	GCKR
REACTOME_RECYCLING_PATHWAY_OF_L1	REACTOME_RECYCLING_PATHWAY_OF_L1	10	-0.344967	-0.730562	0.790614	1	1	143	tags=20%, list=3%, signal=19%	L1CAM/TUBB1
REACTOME_CELLULAR_RESPONSE_TO_CHEMICAL_STRESS	REACTOME_CELLULAR_RESPONSE_TO_CHEMICAL_STRESS	44	0.249596	0.729665	0.860892	1	1	641	tags=11%, list=13%, signal=10%	PTK6/PSMB9/BCL2/NOX4/PSMA6
REACTOME_GLYCOGEN_METABOLISM	REACTOME_GLYCOGEN_METABOLISM	10	0.340715	0.727796	0.765625	1	1	1916	tags=60%, list=38%, signal=38%	PHKG2/PPP1R3C/PGM1/PYGL/GYG1/GYS1
REACTOME_CIRCADIAN_CLOCK	REACTOME_CIRCADIAN_CLOCK	12	-0.334878	-0.727153	0.790353	1	1	1493	tags=42%, list=29%, signal=30%	RXRA/CRTC1/SIK1/MEF2C/PPARGC1A
REACTOME_FORMATION_OF_RNA_POL_II_ELONGATION_COMPLEX	REACTOME_FORMATION_OF_RNA_POL_II_ELONGATION_COMPLEX	17	0.29998	0.725576	0.788863	1	1	3578	tags=100%, list=70%, signal=30%	GTF2H3/GTF2F2/CCNT2/POLR2G/CCNH/EAF1/TCEA1/MLLT1/LEO1/IWS1/SSRP1/GTF2H1/CTDP1/SUPT5H/CDK9/GTF2F1/ELOA
REACTOME_INTERLEUKIN_2_FAMILY_SIGNALING	REACTOME_INTERLEUKIN_2_FAMILY_SIGNALING	11	0.328962	0.721855	0.759219	1	1	160	tags=9%, list=3%, signal=9%	IL15
REACTOME_TRANSCRIPTIONAL_ACTIVATION_OF_MITOCHONDRIAL_BIOGENESIS	REACTOME_TRANSCRIPTIONAL_ACTIVATION_OF_MITOCHONDRIAL_BIOGENESIS	14	0.309052	0.719937	0.784753	1	1	516	tags=21%, list=10%, signal=19%	CAMK4/SIRT4/TFB1M
REACTOME_MEMBRANE_TRAFFICKING	REACTOME_MEMBRANE_TRAFFICKING	181	-0.210718	-0.719032	0.979592	1	1	791	tags=13%, list=15%, signal=12%	PRKAA2/AP4S1/COL7A1/GJB7/SPTBN5/STON1/KIF19/TRAPPC5/RAB36/KIF20A/AKT3/F8/DENND6B/RAB39B/DENND2A/SH3GL3/REPS2/KIF18B/SPTBN4/RAB41/CHMP4A/KIF26A/TUBB1/CD3G
REACTOME_SARS_COV_2_HOST_INTERACTIONS	REACTOME_SARS_COV_2_HOST_INTERACTIONS	39	0.252108	0.716987	0.865979	1	1	327	tags=10%, list=6%, signal=10%	NOD2/VPS33B/HLA-G/RPS10
REACTOME_ATTACHMENT_AND_ENTRY	REACTOME_ATTACHMENT_AND_ENTRY	11	-0.334183	-0.716293	0.815157	1	1	1413	tags=45%, list=28%, signal=33%	NRP1/GPC4/AGRN/GPC2/GPC5
REACTOME_MITOCHONDRIAL_PROTEIN_IMPORT	REACTOME_MITOCHONDRIAL_PROTEIN_IMPORT	16	0.29703	0.7128	0.789838	1	1	98	tags=6%, list=2%, signal=6%	TOMM5
REACTOME_INTERCONVERSION_OF_NUCLEOTIDE_DI_AND_TRIPHOSPHATES	REACTOME_INTERCONVERSION_OF_NUCLEOTIDE_DI_AND_TRIPHOSPHATES	13	0.304023	0.710928	0.771855	1	1	825	tags=23%, list=16%, signal=19%	AK5/RRM2/GLRX
REACTOME_ONCOGENIC_MAPK_SIGNALING	REACTOME_ONCOGENIC_MAPK_SIGNALING	26	-0.275824	-0.710161	0.84331	1	1	130	tags=42%, list=3%, signal=41%	AGGF1/SND1/FAM131B/MRAS/ARAF/DUSP8/KSR1/SPRED3/BCL2L11/MAP3K11/ITGB3
REACTOME_RESOLUTION_OF_D_LOOP_STRUCTURES	REACTOME_RESOLUTION_OF_D_LOOP_STRUCTURES	15	-0.31148	-0.706929	0.827338	1	1	988	tags=33%, list=19%, signal=27%	BRIP1/FIGNL1/XRCC2/BRCA2/RAD51AP1
REACTOME_PYRUVATE_METABOLISM	REACTOME_PYRUVATE_METABOLISM	18	0.288568	0.705591	0.810875	1	1	2028	tags=72%, list=40%, signal=44%	SIRT4/LDHB/GSTZ1/PDHB/PDHX/GID4/PDHA1/ME2/VDAC1/RMND5B/ME1/RANBP9/PDP1
REACTOME_SIGNALING_BY_HEDGEHOG	REACTOME_SIGNALING_BY_HEDGEHOG	43	0.241654	0.703007	0.877285	1	1	358	tags=12%, list=7%, signal=11%	TUBA3D/PTCH2/ADCY4/PSMB9/SCUBE2
REACTOME_METABOLISM_OF_WATER_SOLUBLE_VITAMINS_AND_COFACTORS	REACTOME_METABOLISM_OF_WATER_SOLUBLE_VITAMINS_AND_COFACTORS	45	0.239471	0.702587	0.898438	1	1	464	tags=11%, list=9%, signal=10%	SLC52A1/SLC25A32/NMRK2/MOCOS/NAPRT
REACTOME_SARS_COV_INFECTIONS	REACTOME_SARS_COV_INFECTIONS	92	0.214179	0.700757	0.970588	1	1	645	tags=14%, list=13%, signal=13%	NOD2/BST2/VPS33B/HLA-G/RPS10/ACE2/FXYD6/ANO2/ST3GAL4/RIPK3/NPIPB3/ANO7/IRAK2
REACTOME_TRNA_PROCESSING_IN_THE_NUCLEUS	REACTOME_TRNA_PROCESSING_IN_THE_NUCLEUS	17	0.287596	0.695621	0.812065	1	1	3641	tags=100%, list=71%, signal=29%	POP5/RPP38/NUP88/CLP1/POP1/SEH1L/NUP35/FAM98B/TRNT1/NUP107/NUP62/DDX1/ELAC2/AAAS/NUP133/NUP93/C2orf49
REACTOME_EPH_EPHRIN_MEDIATED_REPULSION_OF_CELLS	REACTOME_EPH_EPHRIN_MEDIATED_REPULSION_OF_CELLS	14	-0.307042	-0.695336	0.834532	1	1	1368	tags=71%, list=27%, signal=52%	EFNB2/AP2A2/AP2A1/EPHB2/EPHB4/VAV2/EPHB6/EPHA6/VAV3/EPHB3
REACTOME_SUMOYLATION_OF_DNA_DAMAGE_RESPONSE_AND_REPAIR_PROTEINS	REACTOME_SUMOYLATION_OF_DNA_DAMAGE_RESPONSE_AND_REPAIR_PROTEINS	21	0.27228	0.693496	0.833333	1	1	3720	tags=100%, list=73%, signal=27%	XRCC4/RNF2/PIAS2/NUP88/SEH1L/NUP35/NSMCE2/SCMH1/RNF168/NUP107/PIAS4/BMI1/NUP62/AAAS/SMC6/PARP1/CBX2/HDAC7/NUP133/NUP93/XPC
REACTOME_GAMMA_CARBOXYLATION_HYPUSINYLATION_HYDROXYLATION_AND_ARYLSULFATASE_ACTIVATION	REACTOME_GAMMA_CARBOXYLATION_HYPUSINYLATION_HYDROXYLATION_AND_ARYLSULFATASE_ACTIVATION	23	0.26732	0.693288	0.838269	1	1	105	tags=4%, list=2%, signal=4%	DHPS
REACTOME_RECRUITMENT_OF_NUMA_TO_MITOTIC_CENTROSOMES	REACTOME_RECRUITMENT_OF_NUMA_TO_MITOTIC_CENTROSOMES	25	-0.269346	-0.691118	0.864348	1	1	1087	tags=28%, list=21%, signal=22%	CEP152/DCTN1/TUBGCP6/PCNT/CEP72/PRKAR2B/TUBB1
REACTOME_DISEASES_OF_CARBOHYDRATE_METABOLISM	REACTOME_DISEASES_OF_CARBOHYDRATE_METABOLISM	14	0.294046	0.684978	0.811659	1	1	2214	tags=71%, list=43%, signal=41%	ALDOB/G6PC3/PPP1R3C/SGSH/ARSB/GYG1/GYS1/GALNS/IDUA/GLB1
REACTOME_SARS_COV_2_ACTIVATES_MODULATES_INNATE_AND_ADAPTIVE_IMMUNE_RESPONSES	REACTOME_SARS_COV_2_ACTIVATES_MODULATES_INNATE_AND_ADAPTIVE_IMMUNE_RESPONSES	27	0.257661	0.684013	0.875	1	1	272	tags=7%, list=5%, signal=7%	NOD2/HLA-G
REACTOME_MRNA_SPLICING_MINOR_PATHWAY	REACTOME_MRNA_SPLICING_MINOR_PATHWAY	12	0.301453	0.682144	0.820734	1	1	3569	tags=100%, list=70%, signal=30%	ZMAT5/GTF2F2/POLR2G/PDCD7/SRSF1/SNRNP25/SRSF6/SNRNP48/SF3B2/SNRNP35/ZRSR2/GTF2F1
REACTOME_RESPIRATORY_ELECTRON_TRANSPORT	REACTOME_RESPIRATORY_ELECTRON_TRANSPORT	25	0.259143	0.679216	0.87822	1	1	1367	tags=36%, list=27%, signal=26%	NDUFAF5/UQCC2/TMEM126A/UQCR11/NDUFA3/SMIM20/SDHD/HCCS/LYRM4
REACTOME_SUMOYLATION_OF_RNA_BINDING_PROTEINS	REACTOME_SUMOYLATION_OF_RNA_BINDING_PROTEINS	13	0.29012	0.678417	0.801706	1	1	3627	tags=100%, list=71%, signal=29%	RNF2/NUP88/SEH1L/NUP35/SCMH1/HNRNPK/NUP107/BMI1/NUP62/AAAS/CBX2/NUP133/NUP93
REACTOME_HIV_TRANSCRIPTION_ELONGATION	REACTOME_HIV_TRANSCRIPTION_ELONGATION	12	0.299686	0.678145	0.827214	1	1	3578	tags=100%, list=70%, signal=30%	GTF2H3/GTF2F2/POLR2G/CCNH/TCEA1/SSRP1/GTF2H1/CTDP1/SUPT5H/CDK9/GTF2F1/ELOA
REACTOME_HSP90_CHAPERONE_CYCLE_FOR_STEROID_HORMONE_RECEPTORS_SHR_IN_THE_PRESENCE_OF_LIGAND	REACTOME_HSP90_CHAPERONE_CYCLE_FOR_STEROID_HORMONE_RECEPTORS_SHR_IN_THE_PRESENCE_OF_LIGAND	11	0.308539	0.677039	0.813449	1	1	426	tags=18%, list=8%, signal=17%	TUBA3D/DNAJA4
REACTOME_TRANSLOCATION_OF_SLC2A4_GLUT4_TO_THE_PLASMA_MEMBRANE	REACTOME_TRANSLOCATION_OF_SLC2A4_GLUT4_TO_THE_PLASMA_MEMBRANE	21	0.265685	0.676697	0.85446	1	1	281	tags=10%, list=6%, signal=9%	TUBA3D/RAB13
REACTOME_RAB_GEFS_EXCHANGE_GTP_FOR_GDP_ON_RABS	REACTOME_RAB_GEFS_EXCHANGE_GTP_FOR_GDP_ON_RABS	32	-0.252101	-0.674884	0.916248	1	1	623	tags=16%, list=12%, signal=14%	TRAPPC5/AKT3/DENND6B/RAB39B/DENND2A
REACTOME_RETROGRADE_TRANSPORT_AT_THE_TRANS_GOLGI_NETWORK	REACTOME_RETROGRADE_TRANSPORT_AT_THE_TRANS_GOLGI_NETWORK	18	0.275855	0.674507	0.834515	1	1	3701	tags=100%, list=73%, signal=28%	RABEPK/NAPG/COG3/STX6/RAB6A/COG6/COG4/USP6NL/ARL1/COG2/NAPA/NAA30/GCC1/PLIN3/NSF/RAB6B/VPS51/COG1
REACTOME_SIGNALING_BY_TGF_BETA_RECEPTOR_COMPLEX	REACTOME_SIGNALING_BY_TGF_BETA_RECEPTOR_COMPLEX	25	-0.262142	-0.672633	0.876522	1	1	977	tags=32%, list=19%, signal=26%	STAT1/CDK9/PRKCZ/TGFB2/LTBP3/TGFB3/COL1A2/ITGB3
REACTOME_REGULATION_OF_MRNA_STABILITY_BY_PROTEINS_THAT_BIND_AU_RICH_ELEMENTS	REACTOME_REGULATION_OF_MRNA_STABILITY_BY_PROTEINS_THAT_BIND_AU_RICH_ELEMENTS	23	0.258992	0.671689	0.85877	1	1	1809	tags=43%, list=35%, signal=28%	PSMB9/TNFSF13/PSMA6/PSMD12/DCP2/EXOSC1/PSMD14/EXOSC8/PSMD11/PSMD7
REACTOME_REGULATION_OF_ENDOGENOUS_RETROELEMENTS_BY_KRAB_ZFP_PROTEINS	REACTOME_REGULATION_OF_ENDOGENOUS_RETROELEMENTS_BY_KRAB_ZFP_PROTEINS	12	-0.30837	-0.669595	0.853432	1	1	1253	tags=42%, list=25%, signal=32%	MTA2/CHD3/ZNF708/ZNF141/ZNF136
REACTOME_PROTEIN_UBIQUITINATION	REACTOME_PROTEIN_UBIQUITINATION	18	0.273745	0.669346	0.834515	1	1	911	tags=17%, list=18%, signal=14%	UCHL3/UBE2T/PEX2
REACTOME_MRNA_SPLICING	REACTOME_MRNA_SPLICING	58	0.222006	0.66814	0.934783	1	1	3592	tags=97%, list=70%, signal=29%	LENG1/ZMAT5/LSM3/SMNDC1/RBM7/SNRPA/PPIL3/PPIL1/MAGOH/SNRPB2/GTF2F2/PPIH/POLR2G/PDCD7/SRSF1/SRSF12/MFAP1/SNRNP25/RBM22/BUD31/HNRNPH2/PLRG1/PPP1R8/USP39/SRSF8/HNRNPK/PRPF4/WBP4/SRSF6/SF1/RBMX2/SDE2/ZNF830/HNRNPR/SNRNP48/GPATCH1/SMU1/RBM17/SUGP1/RBM5/HNRNPU/PNN/DHX16/HNRNPL/SF3B2/SNW1/SF3A1/CHERP/DHX9/CRNKL1/NSRP1/PRPF19/SNRNP35/ZRSR2/GTF2F1/CWC25
REACTOME_REGULATION_OF_LIPID_METABOLISM_BY_PPARALPHA	REACTOME_REGULATION_OF_LIPID_METABOLISM_BY_PPARALPHA	32	0.243483	0.667144	0.881481	1	1	1542	tags=41%, list=30%, signal=29%	GLIPR1/SLC27A1/CD36/MED31/SULT2A1/ANKRD1/ACADM/CDK19/ANGPTL4/MED7/MED27/MED8/MED11
REACTOME_DEGRADATION_OF_BETA_CATENIN_BY_THE_DESTRUCTION_COMPLEX	REACTOME_DEGRADATION_OF_BETA_CATENIN_BY_THE_DESTRUCTION_COMPLEX	20	0.263987	0.666777	0.863426	1	1	720	tags=15%, list=14%, signal=13%	PSMB9/PSMA6/TCF7
REACTOME_RESPONSE_TO_ELEVATED_PLATELET_CYTOSOLIC_CA2	REACTOME_RESPONSE_TO_ELEVATED_PLATELET_CYTOSOLIC_CA2	41	-0.236723	-0.665595	0.925926	1	1	494	tags=20%, list=10%, signal=18%	PRKCA/MMRN1/TGFB3/SERPINA4/F8/VEGFC/CFD/ITGB3
REACTOME_TCF_DEPENDENT_SIGNALING_IN_RESPONSE_TO_WNT	REACTOME_TCF_DEPENDENT_SIGNALING_IN_RESPONSE_TO_WNT	42	0.228243	0.662622	0.934726	1	1	324	tags=7%, list=6%, signal=7%	HECW1/PSMB9/RNF43
REACTOME_TRANSCRIPTIONAL_REGULATION_BY_E2F6	REACTOME_TRANSCRIPTIONAL_REGULATION_BY_E2F6	11	0.301894	0.662458	0.830803	1	1	543	tags=18%, list=11%, signal=16%	RRM2/E2F1
REACTOME_CLASS_I_MHC_MEDIATED_ANTIGEN_PROCESSING_PRESENTATION	REACTOME_CLASS_I_MHC_MEDIATED_ANTIGEN_PROCESSING_PRESENTATION	101	0.19994	0.662376	0.99169	1	1	272	tags=5%, list=5%, signal=5%	TRIM63/MRC1/UBA7/PSMB9/HLA-G
REACTOME_HCMV_EARLY_EVENTS	REACTOME_HCMV_EARLY_EVENTS	15	-0.291281	-0.661088	0.866906	1	1	143	tags=13%, list=3%, signal=13%	GPS2/TUBB1
REACTOME_TBC_RABGAPS	REACTOME_TBC_RABGAPS	16	0.274961	0.659839	0.849885	1	1	3705	tags=100%, list=73%, signal=27%	TBC1D10A/RAB5A/RAB6A/RAB7A/RAB11A/RAB5B/GGA3/RAB8B/RAB7B/ULK1/TBC1D15/TSC2/TBC1D25/RAB6B/TBC1D24/RABGEF1
REACTOME_RHOQ_GTPASE_CYCLE	REACTOME_RHOQ_GTPASE_CYCLE	18	0.269527	0.659034	0.855792	1	1	1677	tags=44%, list=33%, signal=30%	GOPC/ARHGAP33/DEPDC1B/CAV1/CDC42EP4/GJA1/ARL13B/SNAP23
REACTOME_PROTEIN_LOCALIZATION	REACTOME_PROTEIN_LOCALIZATION	46	0.225027	0.658738	0.93634	1	1	2023	tags=57%, list=40%, signal=34%	TOMM5/BAAT/NUDT7/ABCD2/ATP5MC1/PEX2/DHRS4/GET4/GRPEL1/PXMP4/MLYCD/TIMM23/ECI2/ALDH3A2/PECR/ABCD3/ATAD1/TIMM10B/MTX1/SCP2/VDAC1/UBE2D3/PEX13/PRNP/PAOX/CS
REACTOME_REGULATION_OF_TP53_EXPRESSION_AND_DEGRADATION	REACTOME_REGULATION_OF_TP53_EXPRESSION_AND_DEGRADATION	12	0.290555	0.657484	0.850972	1	1	1692	tags=67%, list=33%, signal=45%	CHEK2/CCNA1/SGK1/CCNA2/CDK2/MDM4/CCNG1/PHF20
REACTOME_HEDGEHOG_LIGAND_BIOGENESIS	REACTOME_HEDGEHOG_LIGAND_BIOGENESIS	20	0.259538	0.655539	0.875	1	1	641	tags=15%, list=13%, signal=13%	PSMB9/SCUBE2/PSMA6
REACTOME_TRANSCRIPTIONAL_REGULATION_BY_VENTX	REACTOME_TRANSCRIPTIONAL_REGULATION_BY_VENTX	10	0.305584	0.652753	0.861607	1	1	830	tags=20%, list=16%, signal=17%	ANAPC15/ANAPC4
REACTOME_METABOLISM_OF_LIPIDS	REACTOME_METABOLISM_OF_LIPIDS	240	-0.182889	-0.645453	1	1	1	727	tags=10%, list=14%, signal=9%	PHOSPHO1/GPS2/PIK3CD/ENPP7/GDPD3/PLEKHA4/ABCB4/INPP5J/PTGR2/PTGIS/ARSG/ALOX12/MFSD2A/TSPOAP1/STAR/CYP2D6/CYP27B1/CHKB/ST8SIA5/ETNPPL/B4GALNT1/PIK3R5/ALOX5AP/PLEKHA2/ST6GALNAC6
REACTOME_POTENTIAL_THERAPEUTICS_FOR_SARS	REACTOME_POTENTIAL_THERAPEUTICS_FOR_SARS	22	0.246163	0.64196	0.884615	1	1	3853	tags=100%, list=75%, signal=25%	ACE2/FXYD6/COMT/MTA1/TUBB/RBBP7/STAT2/RBBP4/KDM1A/HSP90AB1/MTA3/HSP90AA1/FURIN/SYK/IMPDH1/AP2A2/AP2A1/MTA2/HMG20B/TYK2/ARID4A/CHD3
REACTOME_EPHB_MEDIATED_FORWARD_SIGNALING	REACTOME_EPHB_MEDIATED_FORWARD_SIGNALING	14	-0.283222	-0.641393	0.890288	1	1	1235	tags=64%, list=24%, signal=49%	LIMK1/EFNB2/EPHB2/EPHB4/ARPC1B/EPHB6/KALRN/ARHGEF28/EPHB3
REACTOME_NUCLEAR_PORE_COMPLEX_NPC_DISASSEMBLY	REACTOME_NUCLEAR_PORE_COMPLEX_NPC_DISASSEMBLY	11	0.292092	0.64095	0.854664	1	1	1751	tags=55%, list=34%, signal=36%	CCNB1/NUP88/CCNB2/SEH1L/NEK7/NUP35
REACTOME_HIV_ELONGATION_ARREST_AND_RECOVERY	REACTOME_HIV_ELONGATION_ARREST_AND_RECOVERY	10	0.299568	0.639902	0.870536	1	1	3578	tags=100%, list=70%, signal=30%	GTF2F2/CCNT2/POLR2G/TCEA1/SSRP1/CTDP1/SUPT5H/CDK9/GTF2F1/ELOA
REACTOME_INTERLEUKIN_1_SIGNALING	REACTOME_INTERLEUKIN_1_SIGNALING	34	0.232012	0.639696	0.914573	1	1	645	tags=12%, list=13%, signal=10%	NOD2/PSMB9/PSMA6/IRAK2
REACTOME_BIOLOGICAL_OXIDATIONS	REACTOME_BIOLOGICAL_OXIDATIONS	57	-0.216308	-0.638897	0.973228	1	1	336	tags=12%, list=7%, signal=12%	ACSM2A/PTGIS/CYP2D6/CYP27B1/CYP26B1/CES3/UGT2B28
REACTOME_RNA_POLYMERASE_III_TRANSCRIPTION_INITIATION_FROM_TYPE_3_PROMOTER	REACTOME_RNA_POLYMERASE_III_TRANSCRIPTION_INITIATION_FROM_TYPE_3_PROMOTER	10	0.298911	0.638499	0.870536	1	1	1181	tags=40%, list=23%, signal=31%	POLR1C/POLR3B/SNAPC1/POLR3F
REACTOME_SUMOYLATION_OF_UBIQUITINYLATION_PROTEINS	REACTOME_SUMOYLATION_OF_UBIQUITINYLATION_PROTEINS	11	0.290006	0.636372	0.856833	1	1	3627	tags=100%, list=71%, signal=29%	PIAS2/TRIM27/NUP88/SEH1L/NUP35/NUP107/PIAS4/NUP62/AAAS/NUP133/NUP93
REACTOME_VIRAL_MESSENGER_RNA_SYNTHESIS	REACTOME_VIRAL_MESSENGER_RNA_SYNTHESIS	11	0.290006	0.636372	0.856833	1	1	3627	tags=100%, list=71%, signal=29%	GTF2F2/POLR2G/NUP88/SEH1L/NUP35/NUP107/NUP62/AAAS/GTF2F1/NUP133/NUP93
REACTOME_FORMATION_OF_WDR5_CONTAINING_HISTONE_MODIFYING_COMPLEXES	REACTOME_FORMATION_OF_WDR5_CONTAINING_HISTONE_MODIFYING_COMPLEXES	13	0.271656	0.635241	0.857143	1	1	3721	tags=100%, list=73%, signal=27%	HCFC2/PHF20/KANSL2/MBIP/TADA2A/MEN1/ASH2L/PAGR1/KAT8/AKAP8L/CXXC1/SETD1A/SGF29
REACTOME_PEROXISOMAL_PROTEIN_IMPORT	REACTOME_PEROXISOMAL_PROTEIN_IMPORT	20	0.251025	0.634037	0.895833	1	1	2020	tags=55%, list=40%, signal=33%	BAAT/NUDT7/PEX2/DHRS4/MLYCD/ECI2/PECR/SCP2/UBE2D3/PEX13/PAOX
REACTOME_FATTY_ACID_METABOLISM	REACTOME_FATTY_ACID_METABOLISM	57	-0.214028	-0.632162	0.979528	1	1	1493	tags=30%, list=29%, signal=21%	RXRA/MORC2/ABCD1/THEM4/EHHADH/ACOT11/MECR/AMACR/ACSM3/ACBD4/CYP2U1/ACSF3/PRKAA2/PTGR2/PTGIS/ALOX12/ALOX5AP
REACTOME_COPI_INDEPENDENT_GOLGI_TO_ER_RETROGRADE_TRAFFIC	REACTOME_COPI_INDEPENDENT_GOLGI_TO_ER_RETROGRADE_TRAFFIC	13	-0.287175	-0.630083	0.900563	1	1	143	tags=15%, list=3%, signal=15%	DCTN1/TUBB1
REACTOME_O_LINKED_GLYCOSYLATION_OF_MUCINS	REACTOME_O_LINKED_GLYCOSYLATION_OF_MUCINS	22	-0.254986	-0.628895	0.896429	1	1	413	tags=9%, list=8%, signal=8%	GALNT17/MUC17
REACTOME_DEACTIVATION_OF_THE_BETA_CATENIN_TRANSACTIVATING_COMPLEX	REACTOME_DEACTIVATION_OF_THE_BETA_CATENIN_TRANSACTIVATING_COMPLEX	10	-0.296885	-0.628736	0.882671	1	1	1350	tags=90%, list=26%, signal=66%	TCF7L1/AKT2/YWHAZ/MEN1/ASH2L/LEF1/TLE3/SOX6/SOX2
REACTOME_RHOJ_GTPASE_CYCLE	REACTOME_RHOJ_GTPASE_CYCLE	16	0.261895	0.628485	0.86836	1	1	127	tags=6%, list=2%, signal=6%	WAS
REACTOME_SYNTHESIS_OF_BILE_ACIDS_AND_BILE_SALTS	REACTOME_SYNTHESIS_OF_BILE_ACIDS_AND_BILE_SALTS	13	0.267772	0.626159	0.867804	1	1	458	tags=15%, list=9%, signal=14%	HSD3B7/BAAT
REACTOME_VIRAL_INFECTION_PATHWAYS	REACTOME_VIRAL_INFECTION_PATHWAYS	168	0.172137	0.620496	0.997167	1	1	1315	tags=24%, list=26%, signal=19%	NOD2/TUBA3D/BST2/KPNA7/VPS33B/PSMB9/HLA-G/RPS10/ACE2/FXYD6/ANO2/HERC5/ST3GAL4/RIPK3/NPIPB3/ANO7/PSMA6/IRAK2/XRCC4/MED31/SERPINE1/RPL17/GTF2H3/PYCARD/CX3CR1/GEMIN2/CHMP6/TAF13/PARP16/RAB5A/RPL29/SAR1B/CDK19/GTF2F2/CCNT2/PPIH/CAV1/POLR2G/TAF12/NUP88/CCNH
REACTOME_INTERLEUKIN_17_SIGNALING	REACTOME_INTERLEUKIN_17_SIGNALING	26	0.232185	0.617338	0.921659	1	1	654	tags=12%, list=13%, signal=10%	NOD2/IRAK2/IL17RB
REACTOME_MITOTIC_G2_G2_M_PHASES	REACTOME_MITOTIC_G2_G2_M_PHASES	56	0.206276	0.616581	0.955923	1	1	1111	tags=27%, list=22%, signal=21%	TUBA3D/PSMB9/CDK11A/HAUS8/E2F1/HAUS1/PSMA6/HAUS5/PLK1/AURKA/CDC25A/NME7/CDC25C/CCNB1/CCNA1
REACTOME_MITOTIC_PROPHASE	REACTOME_MITOTIC_PROPHASE	25	0.233734	0.61262	0.913349	1	1	1751	tags=44%, list=34%, signal=29%	VRK1/PLK1/CCNB1/CNEP1R1/MASTL/NUP88/CCNB2/SEH1L/TMPO/NEK7/NUP35
REACTOME_C_TYPE_LECTIN_RECEPTORS_CLRS	REACTOME_C_TYPE_LECTIN_RECEPTORS_CLRS	32	-0.228235	-0.610996	0.951424	1	1	415	tags=6%, list=8%, signal=6%	PAK3/MUC17
REACTOME_ANTIVIRAL_MECHANISM_BY_IFN_STIMULATED_GENES	REACTOME_ANTIVIRAL_MECHANISM_BY_IFN_STIMULATED_GENES	41	-0.217099	-0.610418	0.958132	1	1	366	tags=7%, list=7%, signal=7%	FANCB/MAPT/TUBB1
REACTOME_ANTIGEN_PROCESSING_UBIQUITINATION_PROTEASOME_DEGRADATION	REACTOME_ANTIGEN_PROCESSING_UBIQUITINATION_PROTEASOME_DEGRADATION	84	0.188257	0.605968	0.98916	1	1	270	tags=4%, list=5%, signal=3%	TRIM63/UBA7/PSMB9
REACTOME_HDR_THROUGH_SINGLE_STRAND_ANNEALING_SSA	REACTOME_HDR_THROUGH_SINGLE_STRAND_ANNEALING_SSA	13	-0.275489	-0.604443	0.926829	1	1	210	tags=23%, list=4%, signal=22%	ATRIP/BRIP1/RAD9B
REACTOME_PROCESSING_OF_CAPPED_INTRON_CONTAINING_PRE_MRNA	REACTOME_PROCESSING_OF_CAPPED_INTRON_CONTAINING_PRE_MRNA	78	0.189477	0.602996	0.986667	1	1	3627	tags=95%, list=71%, signal=28%	LENG1/ZMAT5/LSM3/SMNDC1/RBM7/THOC1/SNRPA/PPIL3/PPIL1/MAGOH/SNRPB2/GTF2F2/PPIH/POLR2G/NUP88/PDCD7/CLP1/THOC7/SRSF1/SRSF12/SEH1L/MFAP1/SNRNP25/NUP35/RBM22/THOC5/BUD31/HNRNPH2/PLRG1/PPP1R8/USP39/CPSF3/SRSF8/FYTTD1/HNRNPK/CSTF3/PRPF4/NUP107/WBP4/SRSF6/SF1/RBMX2/SDE2/NUP62/ZNF830/HNRNPR/POLDIP3/SNRNP48/GPATCH1/SMU1/RBM17/SUGP1/RBM5/HNRNPU/PNN/DHX16/CPSF7/AAAS/HNRNPL/SF3B2/SNW1/SF3A1/CHERP/DHX9/CRNKL1/…
REACTOME_RAB_REGULATION_OF_TRAFFICKING	REACTOME_RAB_REGULATION_OF_TRAFFICKING	39	-0.212993	-0.595026	0.973941	1	1	623	tags=13%, list=12%, signal=11%	TRAPPC5/AKT3/DENND6B/RAB39B/DENND2A
REACTOME_METABOLISM_OF_RNA	REACTOME_METABOLISM_OF_RNA	198	0.162193	0.593693	1	1	1	1891	tags=38%, list=37%, signal=25%	PWP2/NOL12/PSMB9/RPS10/LENG1/TNFSF13/TFB1M/ADAT3/PSMA6/POP5/RPP38/RCL1/PAN2/RPL17/GTF2H3/ZMAT5/GEMIN2/LSM3/SNUPN/SMNDC1/RBM7/THOC1/SNRPA/PPIL3/PPIL1/MAGOH/SNRPB2/RPL29/GTF2F2/PPIH/POLR2G/DCP1B/NUP88/CCNH/BYSL/PRMT5/PDCD7/QTRT1/PSMD12/CLP1/UTP15/OSGEP/THOC7/SRSF1/DCP2/SRSF12/EXOSC1/POP1/PSMD14/FASTKD5/MPHOSPH10/SMG9/SEH1L/PUS3/MFAP1/DIMT1/EXOSC8/WDR12/SNRNP25/EIF4A2/CNOT2/TRMT61B/NUP35/CNOT9/RBM22…
REACTOME_BASE_EXCISION_REPAIR	REACTOME_BASE_EXCISION_REPAIR	13	0.253781	0.593443	0.895522	1	1	3812	tags=100%, list=75%, signal=25%	NTHL1/PARP2/RFC3/TINF2/POLE3/RPA2/SMUG1/NEIL2/RFC4/PARP1/POT1/OGG1/XRCC1
REACTOME_REGULATION_OF_PYRUVATE_METABOLISM	REACTOME_REGULATION_OF_PYRUVATE_METABOLISM	14	0.254484	0.59282	0.896861	1	1	2028	tags=71%, list=40%, signal=43%	SIRT4/GSTZ1/PDHB/PDHX/GID4/PDHA1/RMND5B/ME1/RANBP9/PDP1
REACTOME_COMMON_PATHWAY_OF_FIBRIN_CLOT_FORMATION	REACTOME_COMMON_PATHWAY_OF_FIBRIN_CLOT_FORMATION	14	0.253036	0.589446	0.899103	1	1	2018	tags=57%, list=40%, signal=35%	CD177/SERPIND1/SERPINC1/F13A1/FGG/FGB/FGA/PROS1
REACTOME_ACTIVATION_OF_ATR_IN_RESPONSE_TO_REPLICATION_STRESS	REACTOME_ACTIVATION_OF_ATR_IN_RESPONSE_TO_REPLICATION_STRESS	18	-0.246307	-0.588402	0.927461	1	1	210	tags=22%, list=4%, signal=21%	MCM4/MCM8/ATRIP/RAD9B
REACTOME_EPIGENETIC_REGULATION_OF_GENE_EXPRESSION	REACTOME_EPIGENETIC_REGULATION_OF_GENE_EXPRESSION	46	-0.203522	-0.586011	0.9808	1	1	1944	tags=46%, list=38%, signal=29%	GTF2H1/KAT8/AKAP8L/TTF1/MTA2/CXXC1/EHMT2/UBTF/MORC2/SETD1A/SGF29/EHMT1/CHD3/TAF1C/DPF3/MYBBP1A/ZNF708/ZNF141/SMARCA2/ZNF136/SPOCD1
REACTOME_HIV_LIFE_CYCLE	REACTOME_HIV_LIFE_CYCLE	39	-0.209142	-0.584267	0.97557	1	1	339	tags=31%, list=7%, signal=29%	CTDP1/NMT2/TAF6/SUPT5H/CDK9/GTF2F1/ELOA/NUP133/NUP93/TAF5/TAF4B/CHMP4A
REACTOME_REGULATION_OF_PTEN_STABILITY_AND_ACTIVITY	REACTOME_REGULATION_OF_PTEN_STABILITY_AND_ACTIVITY	19	0.235247	0.58346	0.929245	1	1	2260	tags=68%, list=44%, signal=38%	PSMB9/PSMA6/TRIM27/PSMD12/PSMD14/PSMD11/PSMD7/CSNK2A1/PSMC1/PTEN/AKT2/CSNK2A2/PSMD10
REACTOME_RNA_POLYMERASE_II_TRANSCRIBES_SNRNA_GENES	REACTOME_RNA_POLYMERASE_II_TRANSCRIBES_SNRNA_GENES	23	0.224562	0.582396	0.929385	1	1	3963	tags=100%, list=78%, signal=22%	TAF13/SNAPC1/GTF2F2/CCNT2/POLR2G/INTS14/INTS6/SNAPC3/TAF9/INTS9/GTF2E1/RPRD1B/ICE2/INTS4/INTS3/SNAPC4/INTS11/TAF6/ZC3H8/SUPT5H/CDK9/GTF2F1/TAF5
REACTOME_RHOB_GTPASE_CYCLE	REACTOME_RHOB_GTPASE_CYCLE	16	-0.24875	-0.575274	0.931459	1	1	1845	tags=50%, list=36%, signal=32%	BCR/ARHGEF2/PKN1/ANLN/MCF2L/VAV2/ARHGEF28/ARHGEF25
REACTOME_IRE1ALPHA_ACTIVATES_CHAPERONES	REACTOME_IRE1ALPHA_ACTIVATES_CHAPERONES	18	0.233215	0.570245	0.931442	1	1	1447	tags=39%, list=28%, signal=28%	KDELR3/TATDN2/WIPI1/SRPRB/ZBTB17/TPP1/GSK3A
REACTOME_SULFUR_AMINO_ACID_METABOLISM	REACTOME_SULFUR_AMINO_ACID_METABOLISM	11	0.259745	0.569969	0.91757	1	1	1675	tags=55%, list=33%, signal=37%	SUOX/FMO1/MPST/SLC25A10/APIP/AHCY
REACTOME_DEADENYLATION_DEPENDENT_MRNA_DECAY	REACTOME_DEADENYLATION_DEPENDENT_MRNA_DECAY	16	0.237075	0.568922	0.919169	1	1	1761	tags=56%, list=35%, signal=37%	PAN2/LSM3/DCP1B/DCP2/EXOSC1/EXOSC8/EIF4A2/CNOT2/CNOT9
REACTOME_RSV_HOST_INTERACTIONS	REACTOME_RSV_HOST_INTERACTIONS	23	-0.226385	-0.567426	0.941385	1	1	1722	tags=43%, list=34%, signal=29%	UBE2L6/TYK2/MED26/MED17/IFIH1/GPC4/AGRN/TLR6/GPC2/GPC5
REACTOME_AURKA_ACTIVATION_BY_TPX2	REACTOME_AURKA_ACTIVATION_BY_TPX2	21	-0.230527	-0.566986	0.932292	1	1	1087	tags=52%, list=21%, signal=41%	CEP76/CCP110/CSNK1D/HAUS6/NDE1/PLK4/CEP152/DCTN1/PCNT/CEP72/PRKAR2B
REACTOME_RNA_POLYMERASE_I_TRANSCRIPTION	REACTOME_RNA_POLYMERASE_I_TRANSCRIPTION	15	0.237571	0.566348	0.928251	1	1	3895	tags=100%, list=76%, signal=24%	POLR1C/GTF2H3/CCNH/MTA1/RBBP7/RBBP4/MAPK3/MTA3/GTF2H1/TTF1/MTA2/EHMT2/UBTF/CHD3/TAF1C
REACTOME_PCP_CE_PATHWAY	REACTOME_PCP_CE_PATHWAY	26	0.212879	0.566007	0.958525	1	1	4023	tags=100%, list=79%, signal=21%	PSMB9/PSMA6/WNT11/ARRB2/WNT5B/PSMD12/FZD4/PSMD14/PSMD11/PSMD7/PSMC1/PSMD10/DVL2/RYK/PSME3/PSMD2/AP2A2/AP2A1/PSMA2/SMURF1/ROR2/SCRIB/PSMB8/FZD8/PRKCA/PRICKLE1
REACTOME_FORMATION_OF_INCISION_COMPLEX_IN_GG_NER	REACTOME_FORMATION_OF_INCISION_COMPLEX_IN_GG_NER	10	-0.266757	-0.56493	0.927798	1	1	423	tags=40%, list=8%, signal=37%	PARP1/GTF2H1/XPC/ERCC5
REACTOME_DUAL_INCISION_IN_GG_NER	REACTOME_DUAL_INCISION_IN_GG_NER	10	-0.263978	-0.559045	0.929603	1	1	423	tags=40%, list=8%, signal=37%	RFC4/PARP1/GTF2H1/ERCC5
REACTOME_TRNA_MODIFICATION_IN_THE_NUCLEUS_AND_CYTOSOL	REACTOME_TRNA_MODIFICATION_IN_THE_NUCLEUS_AND_CYTOSOL	15	-0.245633	-0.557485	0.955036	1	1	1878	tags=53%, list=37%, signal=34%	NSUN6/TRMT5/NSUN2/TRMT9B/TRMT12/ADAT2/TRDMT1/LCMT2
REACTOME_RESOLUTION_OF_ABASIC_SITES_AP_SITES	REACTOME_RESOLUTION_OF_ABASIC_SITES_AP_SITES	11	0.253682	0.556664	0.928416	1	1	3812	tags=100%, list=75%, signal=25%	NTHL1/PARP2/RFC3/POLE3/RPA2/SMUG1/NEIL2/RFC4/PARP1/OGG1/XRCC1
REACTOME_DNA_REPAIR	REACTOME_DNA_REPAIR	97	-0.174193	-0.555259	0.996845	1	1	988	tags=15%, list=19%, signal=13%	BRIP1/FIGNL1/TFPT/ABRAXAS1/XRCC2/POLQ/DTL/POLN/ERCC5/EYA1/BRCA2/RAD51AP1/FANCB/RAD9B/NHEJ1
REACTOME_RNA_POLYMERASE_I_TRANSCRIPTION_INITIATION	REACTOME_RNA_POLYMERASE_I_TRANSCRIPTION_INITIATION	14	0.237525	0.553313	0.930493	1	1	3895	tags=100%, list=76%, signal=24%	POLR1C/GTF2H3/CCNH/MTA1/RBBP7/RBBP4/MTA3/GTF2H1/TTF1/MTA2/EHMT2/UBTF/CHD3/TAF1C
REACTOME_NUCLEAR_EVENTS_MEDIATED_BY_NFE2L2	REACTOME_NUCLEAR_EVENTS_MEDIATED_BY_NFE2L2	24	0.211446	0.552757	0.953917	1	1	641	tags=12%, list=13%, signal=11%	PSMB9/BCL2/PSMA6
REACTOME_TRANSPORT_OF_MATURE_TRANSCRIPT_TO_CYTOPLASM	REACTOME_TRANSPORT_OF_MATURE_TRANSCRIPT_TO_CYTOPLASM	20	0.218332	0.551462	0.946759	1	1	3994	tags=100%, list=78%, signal=22%	THOC1/MAGOH/NUP88/THOC7/SRSF1/SEH1L/NUP35/THOC5/CPSF3/FYTTD1/NUP107/SRSF6/NUP62/POLDIP3/AAAS/GLE1/NUP133/NUP93/SYMPK/FIP1L1
REACTOME_TRANSPORT_OF_MATURE_MRNAS_DERIVED_FROM_INTRONLESS_TRANSCRIPTS	REACTOME_TRANSPORT_OF_MATURE_MRNAS_DERIVED_FROM_INTRONLESS_TRANSCRIPTS	11	-0.257216	-0.55132	0.935305	1	1	3795	tags=100%, list=74%, signal=26%	SEH1L/NUP35/CPSF3/NUP107/NUP62/AAAS/NUP133/NUP93/SYMPK/FIP1L1
REACTOME_TP53_REGULATES_TRANSCRIPTION_OF_DNA_REPAIR_GENES	REACTOME_TP53_REGULATES_TRANSCRIPTION_OF_DNA_REPAIR_GENES	20	0.218135	0.550965	0.946759	1	1	3995	tags=100%, list=78%, signal=22%	FANCD2/FANCI/GTF2H3/GTF2F2/CCNT2/POLR2G/CCNH/MLH1/TCEA1/SSRP1/GTF2H1/RAD51D/CTDP1/FANCC/SUPT5H/CDK9/GTF2F1/ELOA/MSH2/JUN
REACTOME_RUNX1_INTERACTS_WITH_CO_FACTORS_WHOSE_PRECISE_EFFECT_ON_RUNX1_TARGETS_IS_NOT_KNOWN	REACTOME_RUNX1_INTERACTS_WITH_CO_FACTORS_WHOSE_PRECISE_EFFECT_ON_RUNX1_TARGETS_IS_NOT_KNOWN	12	-0.251685	-0.546508	0.942486	1	1	3221	tags=92%, list=63%, signal=34%	CBFB/CSNK2A1/SCMH1/CSNK2A2/BMI1/SMARCD1/CBX6/CBX2/PCGF5/AUTS2/SMARCA2
REACTOME_PTEN_REGULATION	REACTOME_PTEN_REGULATION	40	-0.19463	-0.544948	0.98539	1	1	1902	tags=35%, list=37%, signal=22%	CBX6/PSMA2/MTA2/CBX2/RNF146/HDAC7/HDAC5/RRAGD/PSMB8/CHD3/EGR1/JUN/AKT3/NR2E1
REACTOME_SUMOYLATION_OF_CHROMATIN_ORGANIZATION_PROTEINS	REACTOME_SUMOYLATION_OF_CHROMATIN_ORGANIZATION_PROTEINS	15	-0.239143	-0.542756	0.955036	1	1	3888	tags=100%, list=76%, signal=24%	PIAS2/NUP88/SEH1L/NUP35/SCMH1/NUP107/BMI1/NUP62/AAAS/CBX2/NUP133/NUP93/CHD3/L3MBTL2
REACTOME_DEFECTIVE_CFTR_CAUSES_CYSTIC_FIBROSIS	REACTOME_DEFECTIVE_CFTR_CAUSES_CYSTIC_FIBROSIS	18	0.221786	0.5423	0.952719	1	1	2029	tags=56%, list=40%, signal=34%	PSMB9/PSMA6/PSMD12/ERLEC1/PSMD14/PSMD11/PSMD7/ERLIN1/DERL1/PSMC1
REACTOME_TRNA_PROCESSING	REACTOME_TRNA_PROCESSING	34	0.19645	0.541646	0.972362	1	1	4108	tags=100%, list=80%, signal=20%	ADAT3/POP5/RPP38/NUP88/QTRT1/CLP1/OSGEP/POP1/SEH1L/PUS3/TRMT61B/NUP35/WDR4/TP53RK/FAM98B/TRNT1/NUP107/NUP62/PUS1/DDX1/ELAC2/AAAS/NSUN6/TRMT5/TRMU/NUP133/NUP93/C2orf49/NSUN2/TRMT9B/TRMT12/ADAT2/TRDMT1/LCMT2
REACTOME_POSITIVE_EPIGENETIC_REGULATION_OF_RRNA_EXPRESSION	REACTOME_POSITIVE_EPIGENETIC_REGULATION_OF_RRNA_EXPRESSION	12	-0.247837	-0.538154	0.948052	1	1	1793	tags=50%, list=35%, signal=33%	TTF1/MTA2/EHMT2/CHD3/TAF1C/MYBBP1A
REACTOME_FANCONI_ANEMIA_PATHWAY	REACTOME_FANCONI_ANEMIA_PATHWAY	15	-0.237076	-0.538063	0.958633	1	1	530	tags=33%, list=10%, signal=30%	FANCC/FANCG/ATRIP/POLN/FANCB
REACTOME_SARS_COV_2_INFECTION	REACTOME_SARS_COV_2_INFECTION	70	-0.17709	-0.53448	0.993506	1	1	338	tags=9%, list=7%, signal=8%	GPC2/AKT3/GPC5/SMN1/TLR1/CHMP4A
REACTOME_SMAD2_SMAD3_SMAD4_HETEROTRIMER_REGULATES_TRANSCRIPTION	REACTOME_SMAD2_SMAD3_SMAD4_HETEROTRIMER_REGULATES_TRANSCRIPTION	11	0.242153	0.531367	0.943601	1	1	1725	tags=55%, list=34%, signal=36%	SERPINE1/E2F5/CCNT2/TGIF1/TGIF2/TFDP1
REACTOME_NEGATIVE_REGULATION_OF_MAPK_PATHWAY	REACTOME_NEGATIVE_REGULATION_OF_MAPK_PATHWAY	10	0.248331	0.530456	0.9375	1	1	3839	tags=100%, list=75%, signal=25%	DUSP7/DUSP6/MAPK3/PPP5C/MARK3/MAP2K1/PPP2R1B/ARAF/DUSP8/KSR1
REACTOME_RNA_POLYMERASE_III_TRANSCRIPTION_TERMINATION	REACTOME_RNA_POLYMERASE_III_TRANSCRIPTION_TERMINATION	10	-0.247443	-0.524029	0.953069	1	1	254	tags=60%, list=5%, signal=57%	CRCP/POLR3C/NFIC/POLR3E/POLR3H/NFIX
REACTOME_RNA_POLYMERASE_II_TRANSCRIPTION_TERMINATION	REACTOME_RNA_POLYMERASE_II_TRANSCRIPTION_TERMINATION	16	0.21816	0.523532	0.95612	1	1	3994	tags=100%, list=78%, signal=22%	THOC1/MAGOH/CLP1/THOC7/SRSF1/THOC5/CPSF3/FYTTD1/CSTF3/SRSF6/POLDIP3/CPSF7/LSM10/LSM11/SYMPK/FIP1L1
REACTOME_GLYCOSPHINGOLIPID_CATABOLISM	REACTOME_GLYCOSPHINGOLIPID_CATABOLISM	13	0.223708	0.523119	0.950959	1	1	1038	tags=31%, list=20%, signal=25%	GBA3/ARSK/SUMF1/HEXA
REACTOME_REGULATION_OF_CHOLESTEROL_BIOSYNTHESIS_BY_SREBP_SREBF	REACTOME_REGULATION_OF_CHOLESTEROL_BIOSYNTHESIS_BY_SREBP_SREBF	14	0.224558	0.523107	0.943946	1	1	3961	tags=100%, list=78%, signal=22%	GGPS1/SAR1B/IDI1/SC5D/DHCR7/INSIG1/SEC23A/SQLE/NFYC/SCAP/LSS/MBTPS1/RXRA/CYP51A1
REACTOME_ASYMMETRIC_LOCALIZATION_OF_PCP_PROTEINS	REACTOME_ASYMMETRIC_LOCALIZATION_OF_PCP_PROTEINS	18	0.212544	0.519702	0.957447	1	1	4023	tags=100%, list=79%, signal=21%	PSMB9/PSMA6/PSMD12/FZD4/PSMD14/PSMD11/PSMD7/PSMC1/PSMD10/DVL2/PSME3/PSMD2/PSMA2/SMURF1/SCRIB/PSMB8/FZD8/PRICKLE1
REACTOME_SYNTHESIS_OF_PA	REACTOME_SYNTHESIS_OF_PA	11	0.235694	0.517194	0.947939	1	1	2012	tags=64%, list=39%, signal=39%	PLD6/MIGA2/PLA2G4A/GPD1/LIPH/AGPAT1/AGPAT5
REACTOME_FORMATION_OF_TC_NER_PRE_INCISION_COMPLEX	REACTOME_FORMATION_OF_TC_NER_PRE_INCISION_COMPLEX	14	0.222004	0.517158	0.946188	1	1	3974	tags=100%, list=78%, signal=22%	GTF2H3/POLR2G/COPS7A/CCNH/COPS4/TCEA1/ZNF830/COPS7B/CUL4A/COPS2/GTF2H1/PRPF19/COPS3/XAB2
REACTOME_SUMOYLATION_OF_TRANSCRIPTION_COFACTORS	REACTOME_SUMOYLATION_OF_TRANSCRIPTION_COFACTORS	10	-0.244089	-0.516925	0.958484	1	1	1810	tags=50%, list=35%, signal=32%	MRTFA/MBD1/CBX2/SAFB/PPARGC1A
REACTOME_RECRUITMENT_OF_MITOTIC_CENTROSOME_PROTEINS_AND_COMPLEXES	REACTOME_RECRUITMENT_OF_MITOTIC_CENTROSOME_PROTEINS_AND_COMPLEXES	24	-0.203431	-0.515386	0.966549	1	1	1087	tags=25%, list=21%, signal=20%	CEP152/DCTN1/TUBGCP6/PCNT/CEP72/PRKAR2B
REACTOME_FC_EPSILON_RECEPTOR_FCERI_SIGNALING	REACTOME_FC_EPSILON_RECEPTOR_FCERI_SIGNALING	30	-0.194442	-0.514036	0.975986	1	1	1111	tags=23%, list=22%, signal=18%	PSMB8/VAV2/JUN/VAV3/RASGRP1/LAT2/GRAP2
REACTOME_RHOG_GTPASE_CYCLE	REACTOME_RHOG_GTPASE_CYCLE	21	0.201456	0.513107	0.974178	1	1	4080	tags=100%, list=80%, signal=20%	DEPDC1B/MCAM/CAV1/TMPO/EPHA2/ELMO2/RAB7A/ARHGDIA/ARHGAP1/ESYT1/CYFIP1/PREX1/ARHGEF16/LBR/STBD1/MCF2L/VAV2/PLEKHG3/KALRN/MAP3K11/VAV3
REACTOME_REGULATION_OF_PLK1_ACTIVITY_AT_G2_M_TRANSITION	REACTOME_REGULATION_OF_PLK1_ACTIVITY_AT_G2_M_TRANSITION	23	-0.198091	-0.496507	0.971581	1	1	1087	tags=22%, list=21%, signal=17%	CEP152/DCTN1/PCNT/CEP72/PRKAR2B
REACTOME_ABC_TRANSPORTER_DISORDERS	REACTOME_ABC_TRANSPORTER_DISORDERS	24	0.188461	0.492669	0.981567	1	1	1927	tags=50%, list=38%, signal=31%	PSMB9/PSMA6/ABCC2/ABCA12/LMBRD1/PSMD12/ERLEC1/PSMD14/PSMD11/PSMD7/ERLIN1/DERL1
REACTOME_MITOCHONDRIAL_BIOGENESIS	REACTOME_MITOCHONDRIAL_BIOGENESIS	25	0.186004	0.487519	0.985948	1	1	738	tags=16%, list=14%, signal=14%	CAMK4/SIRT4/TFB1M/ATP5MC1
REACTOME_REGULATION_OF_HSF1_MEDIATED_HEAT_SHOCK_RESPONSE	REACTOME_REGULATION_OF_HSF1_MEDIATED_HEAT_SHOCK_RESPONSE	25	0.18496	0.484783	0.985948	1	1	946	tags=16%, list=19%, signal=13%	HSPA6/HSPA14/BAG2/HSPA2
REACTOME_PROCESSING_OF_DNA_DOUBLE_STRAND_BREAK_ENDS	REACTOME_PROCESSING_OF_DNA_DOUBLE_STRAND_BREAK_ENDS	20	-0.198547	-0.48152	0.985965	1	1	210	tags=20%, list=4%, signal=19%	ATRIP/BRIP1/ABRAXAS1/RAD9B
REACTOME_DNA_DAMAGE_RECOGNITION_IN_GG_NER	REACTOME_DNA_DAMAGE_RECOGNITION_IN_GG_NER	13	-0.215871	-0.473638	0.981238	1	1	4006	tags=100%, list=78%, signal=22%	ACTR5/COPS7A/COPS4/COPS7B/RAD23B/CUL4A/COPS2/YY1/PARP1/COPS3/XPC/TFPT
REACTOME_MITOCHONDRIAL_FATTY_ACID_BETA_OXIDATION	REACTOME_MITOCHONDRIAL_FATTY_ACID_BETA_OXIDATION	13	0.202514	0.47356	0.972281	1	1	4073	tags=100%, list=80%, signal=20%	ACADM/HADHB/ACAA2/MCAT/ACOT13/PCTP/HADH/MCEE/HADHA/THEM4/ACOT11/MECR/ACSM3
REACTOME_E3_UBIQUITIN_LIGASES_UBIQUITINATE_TARGET_PROTEINS	REACTOME_E3_UBIQUITIN_LIGASES_UBIQUITINATE_TARGET_PROTEINS	10	0.221241	0.472588	0.964286	1	1	3977	tags=100%, list=78%, signal=22%	PEX2/UBE2D3/PEX13/DERL1/UBE2L3/LEO1/VCP/PEX5/RNF20/PEX12
REACTOME_PEROXISOMAL_LIPID_METABOLISM	REACTOME_PEROXISOMAL_LIPID_METABOLISM	14	0.202161	0.470934	0.975336	1	1	4075	tags=100%, list=80%, signal=20%	NUDT7/MLYCD/ECI2/ALDH3A2/PECR/SCP2/CROT/SLC25A17/ACOX1/SLC27A2/ABCD1/EHHADH/AMACR/ACBD4
REACTOME_MAPK_TARGETS_NUCLEAR_EVENTS_MEDIATED_BY_MAP_KINASES	REACTOME_MAPK_TARGETS_NUCLEAR_EVENTS_MEDIATED_BY_MAP_KINASES	14	-0.206185	-0.466932	0.97482	1	1	1111	tags=43%, list=22%, signal=34%	PPP2R1B/MAPK9/VRK3/JUN/MAPK11/MEF2C
REACTOME_ANCHORING_OF_THE_BASAL_BODY_TO_THE_PLASMA_MEMBRANE	REACTOME_ANCHORING_OF_THE_BASAL_BODY_TO_THE_PLASMA_MEMBRANE	31	-0.174936	-0.466706	0.986667	1	1	2126	tags=55%, list=42%, signal=32%	MARK4/TMEM67/CEP97/CEP76/CCP110/CSNK1D/CC2D2A/HAUS6/NDE1/PLK4/TCTN2/CEP89/CEP152/DCTN1/PCNT/CEP72/PRKAR2B
REACTOME_NUCLEOTIDE_EXCISION_REPAIR	REACTOME_NUCLEOTIDE_EXCISION_REPAIR	27	-0.177861	-0.462197	0.982699	1	1	4202	tags=100%, list=82%, signal=18%	PARP2/ACTR5/RFC3/POLR2G/COPS7A/CCNH/POLE3/COPS4/TCEA1/RPA2/ZNF830/COPS7B/RAD23B/CUL4A/COPS2/YY1/RFC4/PARP1/GTF2H1/PRPF19/COPS3/XPC/XRCC1/XAB2/TFPT/ERCC5
REACTOME_RAC2_GTPASE_CYCLE	REACTOME_RAC2_GTPASE_CYCLE	25	0.175625	0.460316	0.98829	1	1	4212	tags=100%, list=83%, signal=18%	RACGAP1/DEPDC1B/MCAM/CAV1/CDC42EP4/TMPO/MTX1/EPHA2/RAB7A/GIT1/ARHGDIA/ARHGAP1/ARHGAP17/ABI1/ESYT1/SWAP70/CYFIP1/PREX1/LBR/STBD1/BCR/VAV2/TAOK3/VAV3/SYDE1
REACTOME_G2_M_DNA_DAMAGE_CHECKPOINT	REACTOME_G2_M_DNA_DAMAGE_CHECKPOINT	21	-0.186912	-0.459715	0.989583	1	1	210	tags=19%, list=4%, signal=18%	ATRIP/BRIP1/ABRAXAS1/RAD9B
REACTOME_DISEASES_OF_PROGRAMMED_CELL_DEATH	REACTOME_DISEASES_OF_PROGRAMMED_CELL_DEATH	14	0.197137	0.45923	0.982063	1	1	1027	tags=29%, list=20%, signal=23%	RIPK3/CDC25A/DNMT3B/CDC25C
REACTOME_COPII_MEDIATED_VESICLE_TRANSPORT	REACTOME_COPII_MEDIATED_VESICLE_TRANSPORT	23	-0.182868	-0.45835	0.98579	1	1	749	tags=13%, list=15%, signal=11%	COL7A1/TRAPPC5/F8
REACTOME_MYD88_INDEPENDENT_TLR4_CASCADE	REACTOME_MYD88_INDEPENDENT_TLR4_CASCADE	36	0.164389	0.45824	0.997442	1	1	645	tags=8%, list=13%, signal=7%	NOD2/RIPK3/IRAK2
REACTOME_RNA_POLYMERASE_II_PRE_TRANSCRIPTION_EVENTS	REACTOME_RNA_POLYMERASE_II_PRE_TRANSCRIPTION_EVENTS	26	-0.177826	-0.457847	0.989437	1	1	4202	tags=100%, list=82%, signal=18%	TAF13/GTF2F2/CCNT2/POLR2G/TAF12/CCNH/EAF1/TAF9/TCEA1/GTF2E1/MLLT1/LEO1/IWS1/SSRP1/TAF15/TAF7/GTF2H1/CTDP1/TAF6/SUPT5H/CDK9/GTF2F1/ELOA/TAF5/TAF4B
REACTOME_TRANSCRIPTIONAL_REGULATION_BY_RUNX3	REACTOME_TRANSCRIPTIONAL_REGULATION_BY_RUNX3	24	0.172703	0.451475	0.986175	1	1	720	tags=12%, list=14%, signal=11%	PSMB9/PSMA6/TCF7
REACTOME_NONSENSE_MEDIATED_DECAY_NMD	REACTOME_NONSENSE_MEDIATED_DECAY_NMD	12	0.19748	0.446868	0.987041	1	1	1155	tags=33%, list=23%, signal=26%	RPS10/RPL17/MAGOH/RPL29
REACTOME_SIGNALING_BY_ROBO_RECEPTORS	REACTOME_SIGNALING_BY_ROBO_RECEPTORS	28	0.165906	0.441825	0.987893	1	1	641	tags=14%, list=13%, signal=13%	PSMB9/RPS10/CXCL12/PSMA6
REACTOME_ERK_MAPK_TARGETS	REACTOME_ERK_MAPK_TARGETS	11	-0.2057	-0.4409	0.987061	1	1	884	tags=36%, list=17%, signal=30%	PPP2R1B/VRK3/MAPK11/MEF2C
REACTOME_CELLULAR_RESPONSE_TO_HEAT_STRESS	REACTOME_CELLULAR_RESPONSE_TO_HEAT_STRESS	30	0.161571	0.440197	0.990453	1	1	946	tags=13%, list=19%, signal=11%	HSPA6/HSPA14/BAG2/HSPA2
REACTOME_ORGANELLE_BIOGENESIS_AND_MAINTENANCE	REACTOME_ORGANELLE_BIOGENESIS_AND_MAINTENANCE	87	0.135722	0.438828	1	1	1	961	tags=18%, list=19%, signal=15%	TUBA3D/CAMK4/SIRT4/HAUS8/TFB1M/FBF1/HAUS1/CYS1/PDE6D/ATP5MC1/HAUS5/MKKS/INPP5E/PLK1/BBIP1/TMEM216
REACTOME_GLOBAL_GENOME_NUCLEOTIDE_EXCISION_REPAIR_GG_NER	REACTOME_GLOBAL_GENOME_NUCLEOTIDE_EXCISION_REPAIR_GG_NER	22	-0.177686	-0.438243	0.989286	1	1	4202	tags=45%, list=82%, signal=8%	COPS2/YY1/RFC4/PARP1/GTF2H1/COPS3/XPC/XRCC1/TFPT/ERCC5
REACTOME_TRANSCRIPTION_OF_THE_HIV_GENOME	REACTOME_TRANSCRIPTION_OF_THE_HIV_GENOME	22	-0.177686	-0.438243	0.989286	1	1	4202	tags=50%, list=82%, signal=9%	TAF15/TAF7/GTF2H1/CTDP1/TAF6/SUPT5H/CDK9/GTF2F1/ELOA/TAF5/TAF4B
REACTOME_RND2_GTPASE_CYCLE	REACTOME_RND2_GTPASE_CYCLE	11	-0.203308	-0.435773	0.987061	1	1	1826	tags=45%, list=36%, signal=29%	MUC13/SCRIB/NISCH/PRAG1/UBXN11
REACTOME_TRANSCRIPTION_COUPLED_NUCLEOTIDE_EXCISION_REPAIR_TC_NER	REACTOME_TRANSCRIPTION_COUPLED_NUCLEOTIDE_EXCISION_REPAIR_TC_NER	20	-0.177616	-0.430757	0.996491	1	1	4202	tags=95%, list=82%, signal=17%	RFC3/POLR2G/COPS7A/CCNH/POLE3/COPS4/TCEA1/RPA2/ZNF830/COPS7B/CUL4A/COPS2/RFC4/GTF2H1/PRPF19/COPS3/XRCC1/XAB2/ERCC5
REACTOME_OXIDATIVE_STRESS_INDUCED_SENESCENCE	REACTOME_OXIDATIVE_STRESS_INDUCED_SENESCENCE	19	0.173451	0.430195	0.983491	1	1	4222	tags=100%, list=83%, signal=17%	E2F1/CDKN2D/RNF2/MDM4/TFDP1/RBBP7/MAP2K4/SCMH1/RBBP4/BMI1/MAPK3/MAPK14/MAPKAPK5/MAP2K3/MAPK9/CBX6/CBX2/JUN/MAPK11
REACTOME_RNA_POLYMERASE_III_TRANSCRIPTION	REACTOME_RNA_POLYMERASE_III_TRANSCRIPTION	17	-0.182891	-0.429077	0.994746	1	1	254	tags=53%, list=5%, signal=50%	SNAPC4/CRCP/POLR3C/GTF3C5/NFIC/POLR3E/BRF1/POLR3H/NFIX
REACTOME_HIV_TRANSCRIPTION_INITIATION	REACTOME_HIV_TRANSCRIPTION_INITIATION	15	-0.188428	-0.427653	0.985612	1	1	339	tags=47%, list=7%, signal=44%	TAF15/TAF7/GTF2H1/TAF6/GTF2F1/TAF5/TAF4B
REACTOME_MEIOSIS	REACTOME_MEIOSIS	11	0.194404	0.42659	0.980477	1	1	259	tags=9%, list=5%, signal=9%	MSH5
REACTOME_DUAL_INCISION_IN_TC_NER	REACTOME_DUAL_INCISION_IN_TC_NER	14	-0.18621	-0.421696	0.992806	1	1	423	tags=36%, list=8%, signal=33%	RFC4/GTF2H1/PRPF19/XAB2/ERCC5
REACTOME_RESPIRATORY_SYNCYTIAL_VIRUS_INFECTION_PATHWAY	REACTOME_RESPIRATORY_SYNCYTIAL_VIRUS_INFECTION_PATHWAY	32	-0.156625	-0.419291	0.99665	1	1	1722	tags=31%, list=34%, signal=21%	UBE2L6/TYK2/MED26/MED17/IFIH1/GPC4/AGRN/TLR6/GPC2/GPC5
REACTOME_RAC3_GTPASE_CYCLE	REACTOME_RAC3_GTPASE_CYCLE	24	-0.163583	-0.414431	0.994718	1	1	4274	tags=100%, list=84%, signal=16%	DEPDC1B/MCAM/CAV1/TMPO/SNAP23/EPHA2/RAB7A/AMIGO2/GIT1/ARHGAP1/ARHGAP17/ABI1/ESYT1/SWAP70/CYFIP1/PREX1/LBR/STBD1/BCR/VAV2/TAOK3/SYDE1/ARHGAP6
REACTOME_RHOF_GTPASE_CYCLE	REACTOME_RHOF_GTPASE_CYCLE	13	0.175211	0.409714	0.995736	1	1	4212	tags=100%, list=83%, signal=18%	DEPDC1B/MCAM/CAV1/TMPO/SNAP23/RAB7A/STEAP3/BAIAP2L2/ARHGAP1/ESYT1/RHOF/DIAPH2/SYDE1
REACTOME_CILIUM_ASSEMBLY	REACTOME_CILIUM_ASSEMBLY	62	0.133573	0.409604	1	1	1	961	tags=19%, list=19%, signal=16%	TUBA3D/HAUS8/FBF1/HAUS1/CYS1/PDE6D/HAUS5/MKKS/INPP5E/PLK1/BBIP1/TMEM216
REACTOME_HIV_INFECTION	REACTOME_HIV_INFECTION	56	-0.138754	-0.408951	1	1	1	339	tags=4%, list=7%, signal=3%	TAF4B/CHMP4A
REACTOME_TOLL_LIKE_RECEPTOR_9_TLR9_CASCADE	REACTOME_TOLL_LIKE_RECEPTOR_9_TLR9_CASCADE	35	0.147604	0.408792	1	1	1	137	tags=3%, list=3%, signal=3%	NOD2
REACTOME_UB_SPECIFIC_PROCESSING_PROTEASES	REACTOME_UB_SPECIFIC_PROCESSING_PROTEASES	48	0.137536	0.405115	0.997361	1	1	1532	tags=31%, list=30%, signal=22%	ADRB2/PSMB9/CDC20/PSMA6/USP28/CDC25A/ARRB2/CCNA1/MAT2B/SMAD1/CCNA2/PSMD12/MDM4/USP21/PSMD14
REACTOME_RNA_POLYMERASE_III_TRANSCRIPTION_INITIATION_FROM_TYPE_1_PROMOTER	REACTOME_RNA_POLYMERASE_III_TRANSCRIPTION_INITIATION_FROM_TYPE_1_PROMOTER	11	0.183585	0.402849	0.991323	1	1	4169	tags=100%, list=82%, signal=18%	POLR1C/POLR3B/POLR3F/GTF3C2/GTF3C3/CRCP/POLR3C/GTF3C5/POLR3E/BRF1/POLR3H
REACTOME_TRANSCRIPTIONAL_REGULATION_OF_GRANULOPOIESIS	REACTOME_TRANSCRIPTIONAL_REGULATION_OF_GRANULOPOIESIS	10	0.184335	0.393754	0.993304	1	1	4165	tags=100%, list=82%, signal=18%	E2F1/CDK2/TFDP1/CBFB/DEK/KLF5/RARA/LEF1/RXRA/GFI1
REACTOME_MATERNAL_TO_ZYGOTIC_TRANSITION_MZT	REACTOME_MATERNAL_TO_ZYGOTIC_TRANSITION_MZT	10	-0.181586	-0.384558	0.994585	1	1	4180	tags=90%, list=82%, signal=16%	EIF4A2/CNOT2/CNOT9/CNOT8/CNOT7/ZFP36L2/TNKS1BP1/EIF4G1/DIS3L2
REACTOME_KEAP1_NFE2L2_PATHWAY	REACTOME_KEAP1_NFE2L2_PATHWAY	34	0.137827	0.380014	1	1	1	641	tags=9%, list=13%, signal=8%	PSMB9/BCL2/PSMA6
REACTOME_RND1_GTPASE_CYCLE	REACTOME_RND1_GTPASE_CYCLE	10	-0.172949	-0.366266	0.998195	1	1	4224	tags=100%, list=83%, signal=17%	CAV1/ALDH3A2/TXNL1/TMEM59/EPHA2/RRAS2/MUC13/RND1/UBXN11
REACTOME_RND3_GTPASE_CYCLE	REACTOME_RND3_GTPASE_CYCLE	10	-0.172949	-0.366266	0.998195	1	1	4224	tags=40%, list=83%, signal=7%	MUC13/SCRIB/NISCH/UBXN11
REACTOME_TRANSCRIPTIONAL_ACTIVITY_OF_SMAD2_SMAD3_SMAD4_HETEROTRIMER	REACTOME_TRANSCRIPTIONAL_ACTIVITY_OF_SMAD2_SMAD3_SMAD4_HETEROTRIMER	15	-0.160739	-0.36481	0.996403	1	1	4287	tags=100%, list=84%, signal=16%	E2F5/CCNT2/TGIF1/TGIF2/TFDP1/UBE2D3/MEN1/MAPK3/FURIN/SNW1/PARP1/STAT1/CDK9/COL1A2
REACTOME_TRANSLATION_OF_SARS_COV_2_STRUCTURAL_PROTEINS	REACTOME_TRANSLATION_OF_SARS_COV_2_STRUCTURAL_PROTEINS	12	0.153967	0.348405	0.99568	1	1	4320	tags=100%, list=85%, signal=15%	ST3GAL4/PARP16/GSK3A/PARP6/STT3A/ST6GALNAC3/RPN2/FUT8/PARP8/ST6GALNAC2/ST6GALNAC4/PARP10
