# Supplementary material for: Epigenetic control of PDX1 and NGN3 by a computationally designed PRC2 inhibitor enforces pancreatic endocrine differentiation from pluripotent stem cells
Source: Research Square preprint supplement (doi:10.21203/rs.3.rs-9115136/v1), 2026-03-26
Supplement: Supplementary file 5 [file af62c249e54b62265640602e.xlsx]

## Sheet: Sheet1
Table S6-Genes comprised within Enrichr GO Biological Process 2025 related to the top 1% unique H3K27Ac peaks in EBdCas9+PDX1/NGN3 gRNAs
Regulation of Small GTPase Mediated Signal Transduction (GO:0051056)	PLEKHG3, VAV3, PLEKHG1, DENND4B, ARHGEF28, DOCK8, FAM13A, ARHGEF19, ARHGAP27, ARHGAP26, RHOD, ARHGAP35, ARHGAP45, VAV2, AKAP13, KBTBD6, SH3BP1, CHN1, PLEKHG4B, KBTBD7, CGNL1, RALGPS1]
Positive Regulation of Biosynthetic Process (GO:0009891)	NNMT, SMAD3, INSR, F2R, NFATC3, SORBS1, SIRT1, KLF2, RUNX1, RPTOR, MLXIPL, CREB3L1, PLCG2, AKT1, ASL
Dorsal/Ventral Axis Specification (GO:0009950)	SFRP1, SMAD6, CXXC4, MDFI
Regulation of GTPase Activity (GO:0043087)	GPSM1, VAV3, DOCK8, F2R, EFNA5, VAV2, SOD1, SIPA1L1, FGD6, SH3BP1, RAPGEF1, RAPGEF2, SH3BP4, PLXNB1, CCL19, AGRN, RGS7, MAP4K4, LIMS1
Establishment or Maintenance of Apical/Basal Cell Polarity (GO:0035088)	CRB2, MPP2, MTCL1, DLG5, PARD3, FSCN1, FOXJ1
Negative Regulation of Wnt Signaling Pathway (GO:0030178)	WWOX, TLE2, IGFBP2, SHISA2, LIMD1, CXXC4, TLE6, TLE5, SOX2, CYLD, SFRP1, ZNRF3, STK24, TMEM88, FRMD8, CCDC88C, SNAI2, TRABD2B, MDFI
Regulation of MAPK Cascade (GO:0043408)	SMIM29, PELI2, ADRB1, ADRB2, PRDM11, SOX2, MYDGF, DUSP13B, PLCG2, FAM83D, MAP4K4, DRD5, DUSP5, GDF15, INSR, PRKCD, F2R, DUSP29, DUSP6, VEGFA, SOD1, STK24, NEK10, SPNS1, ADAM8, FGFR3, MDFI, FGFR1
Regulation of Intracellular Signal Transduction (GO:1902531)	SMIM29, ARHGEF28, DOCK8, FAM13A, HSPB1, PRDM11, ARHGAP35, AKAP13, SH3BP1, CHN1, PLEKHG4B, PLCG2, AKT1, FAM83D, MAP4K4, VAV3, PLEKHG3, PLEKHG1, ARHGEF19, ARHGAP27, ARHGAP26, RHOD, SIRT1, VAV2, HIPK2, VEGFA, ARHGAP45, TTI1, CYLD, PPM1B, STK24]
Positive Regulation of Extracellular Matrix Organization (GO:1903055)	SMAD3, FSCN1, IER3IP1, TGFBR1, CLASP1, RUNX1
Regulation of Sodium Ion Transport (GO:0002028)	NKAIN1, ATP2B4, NEDD4L, RANGRF, PRSS8, GPD1L, SCN1B, SNTA1
