# Supplementary material for: Epigenetic control of PDX1 and NGN3 by a computationally designed PRC2 inhibitor enforces pancreatic endocrine differentiation from pluripotent stem cells
Source: Research Square preprint supplement (doi:10.21203/rs.3.rs-9115136/v1), 2026-03-26
Supplement: Supplementary file 6 [file c0e32912c9a8bd5d0af78ba1.xlsx]

## Sheet: Sheet1
Table S5-Genes comprised within Enrichr GO Biological Process 2025 related to the top 1% unique H3K27Ac peaks in EBdCas9-treated samples.
Cellular Responses to Growth factors (GO:0071363)	NRP1, PDCD5, SYAP1, HSPB1, CIB1, ANKRD1, SOX6, PDE8A, SOX5, ADAMTS7, ACVR1, MAP2K3, DDX18, SPHK1, MARS1,KNSTRN, TGFBR2, ERN1, GAREM1, MAPKAPK2, GAS1, RAPGEF2, PRKD2, ITGB1BP1, PRKD1, SOS1, PDGFB, TWF2,
	ADAMTS12, ACVR1B, CORO1B, ZFP36L2, EGFR, ZFP36L1, DLL4, ERBB2, STAT5B, WWOX, SMAD4, EGR3, SMAD3, DAB2IP,WNT7A, BMP7, ACVR2A, PDE3A, CTNNB1, SPRY2, BMPR1B, BCAR1, BMPR1A, LGMN, LIMS11
Regulation of TGFbeta Receptor Signaling Pathway (GO:0017015)	ZNF451, HTRA4, LTBP4, REP, THBS1, STK11, MECOM, SNX25, PRDM16, EP300, EMILIN1, RBBP7, SKIL, SNX6, SMAD2, SMAD4, CDKN2B, SMURF2, TSC22D1, SMURF1, ITGA3, SLC2A10, CIDEA, SOX11. SMAD6. IL17RD.
	VASN. DKK3 SAP30, SMAD7, HIPK2, TGFBR3, SKI, EID2, LATS2, CILP, GIPC1, SPRY2, SRFBP1, SPRY1, PPARA, DAND51
Regulation of Focal Adhesion Assembly (GO:0051893)	NRP1, MACF1, LIMCH1, ROCK2, SRC, RCC2, PTEN, PTPRJ, EFNA5, THBS1, PTK2, ACTG1, CORO1C, SLC9A1, PTPRA, DLC1, ITGB1BP1, TLN1, EPHA3, VCL, CLASP2, MAP4K4, LIMS11
Positive Regulation of Protein Localization to Cell Periphery (GO:1904377)	ITGB1, ITGA3, EPB41, NRXN1, ARHGEF16, RHOG, ATP2B4, CIB1, AKAP5, SORBS1, EGFR, GNAI1, PGRMC1, GPER1,EPB41L2. C1D. STX4, STX3. SOSTM1, EPHA3, SPTBN1. EPHA2, SNCA. EIF4G11
Regulation of Stress Fibers Assembly (GO:0051492)	NRP1, ROCK2, LPAR1, TACSTD2, F11R, ACTG1, AMOT, SLC9A1, STMN1, RHPN1, CCN2, RHPN2, SYNPO, WASF2, CGNL1,CLASP2. CARMIL1. LIMCH1. TGFB3. SERPINF2. TPM1, LIMK1. ARAP1. TJP1. SLTM. DLC1. PXDN. ALMS1. ITGB1BP11
Negative Regulation of Cell Junction assembly (GO:1901889)	ROBO2. ROCK2, SRC. RCC2, PTEN, THBS1, CORO1C, IKBKB. DLC1, ITGB1BP1, SLIT3. CLASP2. TLR21
Regulation of axogenesis(GO:0050770)	ROBO2, BRSK1, EPHA4, NTRK2, PLXND1, PTEN, ARHGAP35, TIAM2, FYCO1, TIAM1, EFNB3, SIPA1L1, KIF13B, PLXNB2,RRC4C. SKIL. MARK2, EPHB31
Regulation of Signal Transducion (GO:1902531)	TRIO, ARHGAP8, EDA, JPT2, WWC1, ITSN1, CTNND1, WWC2, PTEN, HSPB1, ARHGAP39, ARHGAP35, SYDE2, AKAP13, STK11, EP300, ITGAV, KMT5A, ACVR1, PLEKHG3, EPHA4, USP7, PLEKHG1, ARHGEF12, SPHK2, MINK1, USP2, ATP6AP2, ARHGEF19, URB2, ARAP1, TRAF1, VAV2, TIAM2, TIAM1, TRAF3, KAT6A, SPATA13, ARHGEF3, RGN, ARHGEF4, ARHGEF1, RHOU, ARHGEF2, UBE2V1, PLPP3, SGK1, SQSTM1, SAMD5, NLGN1, SGMS1, ARHGEF28, NOP2, ARHGAP1…
Rac Protein Signal transduction (GO:0016601)	FARP2, CYFIP1, NCKAP1, TIAM1, HACE1, DOCK7, RHOG, ELMO1, BRK1, CDH13, HACD3
Regulation of Hydrolase activity (GO:0051336)	EPHA4, NTRK2, RDX, DAB2IP, EFNA5, RAP1GAP, PTK2, SERPINA5, VAV2, FGD3, FGD4, WRN, SIPA1L1, PDE3A, PLXNB2, ITGB1BP1, CDK5RAP3, PRKG1, EPHA3, RAB3GAP1, EPHB3, TBC1D10B]
