# Supplementary material for: Epigenetic control of PDX1 and NGN3 by a computationally designed PRC2 inhibitor enforces pancreatic endocrine differentiation from pluripotent stem cells
Source: Research Square preprint supplement (doi:10.21203/rs.3.rs-9115136/v1), 2026-03-26
Supplement: Supplementary file 7 [file c9ca71e85b51b256dee256cb.xlsx]

## Sheet: Sheet1
Table S8. GSEA of Protein coding genes concordantly regulated in H1 and MEL1 Double hESC treated with PDX1-guided EBdCas9 vs EBdCas9 only.
ID	Description	setSize	enrichmentScore	NES	pvalue	p.adjust	qvalue	rank	leading_edge	core_enrichment
REACTOME_GABA_RECEPTOR_ACTIVATION	REACTOME_GABA_RECEPTOR_ACTIVATION	19	-0.80823	-2.00105	0.00012	0.087042	0.087042	93	tags=21%, list=2%, signal=21%	GABRG3/GABRA2/GABRQ/GABRB1
REACTOME_ANTI_INFLAMMATORY_RESPONSE_FAVOURING_LEISHMANIA_PARASITE_INFECTION	REACTOME_ANTI_INFLAMMATORY_RESPONSE_FAVOURING_LEISHMANIA_PARASITE_INFECTION	21	-0.75596	-1.91391	0.000954	0.322926	0.322926	272	tags=19%, list=5%, signal=18%	PRKAR2B/CYSLTR2/CD3G/FCGR2A
REACTOME_DNA_DAMAGE_RECOGNITION_IN_GG_NER	REACTOME_DNA_DAMAGE_RECOGNITION_IN_GG_NER	16	0.795806	1.81545	0.002458	0.322926	0.322926	2	tags=6%, list=0%, signal=6%	INO80B
REACTOME_FCGR3A_MEDIATED_IL10_SYNTHESIS	REACTOME_FCGR3A_MEDIATED_IL10_SYNTHESIS	11	-0.82149	-1.78412	0.00254	0.322926	0.322926	272	tags=27%, list=5%, signal=26%	PRKAR2B/CD3G/FCGR2A
REACTOME_TRANSCRIPTIONAL_AND_POST_TRANSLATIONAL_REGULATION_OF_MITF_M_EXPRESSION_AND_ACTIVITY	REACTOME_TRANSCRIPTIONAL_AND_POST_TRANSLATIONAL_REGULATION_OF_MITF_M_EXPRESSION_AND_ACTIVITY	10	-0.82288	-1.77413	0.00268	0.322926	0.322926	2	tags=20%, list=0%, signal=20%	LEF1/PAX3
REACTOME_SIGNALING_BY_RECEPTOR_TYROSINE_KINASES	REACTOME_SIGNALING_BY_RECEPTOR_TYROSINE_KINASES	187	-0.41131	-1.49208	0.002145	0.322926	0.322926	714	tags=17%, list=12%, signal=15%	IRS4/VRK3/FGF2/THEM4/ATP6V1E2/ANOS1/EGR3/TIAM1/CD274/PDGFD/THBS4/MUC20/ARC/NOS3/SPP1/ADAM12/LAMA2/ATP6V1C2/FOSB/COL9A3/EGR4/VEGFC/FGF5/KL/ALKAL1/GABRG3/FGF17/ALK/SH3GL3/GABRQ/GABRB1
REACTOME_NUCLEOTIDE_EXCISION_REPAIR	REACTOME_NUCLEOTIDE_EXCISION_REPAIR	47	0.61685	1.72434	0.003771	0.389542	0.389542	25	tags=4%, list=0%, signal=4%	INO80B/GTF2H4
REACTOME_NEGATIVE_REGULATION_OF_FGFR1_SIGNALING	REACTOME_NEGATIVE_REGULATION_OF_FGFR1_SIGNALING	10	-0.81049	-1.74743	0.004364	0.394401	0.394401	672	tags=50%, list=11%, signal=44%	FGF2/ANOS1/FGF5/KL/FGF17
REACTOME_GLOBAL_GENOME_NUCLEOTIDE_EXCISION_REPAIR_GG_NER	REACTOME_GLOBAL_GENOME_NUCLEOTIDE_EXCISION_REPAIR_GG_NER	41	0.648899	1.76292	0.005674	0.453886	0.453886	25	tags=5%, list=0%, signal=5%	INO80B/GTF2H4
REACTOME_GASTRULATION	REACTOME_GASTRULATION	36	-0.60441	-1.70536	0.006278	0.453886	0.453886	672	tags=19%, list=11%, signal=17%	FGF2/DLL3/LEF1/PSMA2/POU3F1/NOTO/PAX3
REACTOME_HATS_ACETYLATE_HISTONES	REACTOME_HATS_ACETYLATE_HISTONES	29	-0.60529	-1.63986	0.012055	0.792371	0.792371	2	tags=10%, list=0%, signal=10%	SAP130/MBIP/PAX3
REACTOME_UCH_PROTEINASES	REACTOME_UCH_PROTEINASES	22	0.689344	1.66131	0.015462	0.812014	0.812014	2	tags=5%, list=0%, signal=5%	INO80B
REACTOME_BRANCHED_CHAIN_AMINO_ACID_CATABOLISM	REACTOME_BRANCHED_CHAIN_AMINO_ACID_CATABOLISM	11	0.768604	1.63914	0.023394	0.812014	0.812014	27	tags=9%, list=0%, signal=9%	BCKDHA
REACTOME_SIGNALING_BY_PTK6	REACTOME_SIGNALING_BY_PTK6	16	0.715878	1.63311	0.023585	0.812014	0.812014	421	tags=25%, list=7%, signal=23%	NRG4/GPNMB/LRRK2/BTC
REACTOME_MITF_M_REGULATED_MELANOCYTE_DEVELOPMENT	REACTOME_MITF_M_REGULATED_MELANOCYTE_DEVELOPMENT	34	-0.5739	-1.60779	0.013805	0.812014	0.812014	497	tags=12%, list=8%, signal=11%	LEF1/MYRIP/GMPR/PAX3
REACTOME_GLUCOSE_METABOLISM	REACTOME_GLUCOSE_METABOLISM	30	0.629126	1.60629	0.020592	0.812014	0.812014	142	tags=10%, list=2%, signal=10%	PFKFB1/FBP2/SLC37A2
REACTOME_PROTEIN_PROTEIN_INTERACTIONS_AT_SYNAPSES	REACTOME_PROTEIN_PROTEIN_INTERACTIONS_AT_SYNAPSES	34	-0.56293	-1.57705	0.018011	0.812014	0.812014	989	tags=38%, list=16%, signal=32%	SYT10/LIN7A/GRIN2A/APBA1/NLGN4X/DLG2/SLITRK2/BEGAIN/NLGN1/SLITRK6/GRIN2D/SLITRK1/PPFIA2
REACTOME_LEISHMANIA_INFECTION	REACTOME_LEISHMANIA_INFECTION	48	-0.5152	-1.51703	0.023491	0.812014	0.812014	349	tags=10%, list=6%, signal=10%	IL1A/PRKAR2B/CYSLTR2/CD3G/FCGR2A
REACTOME_TRANSMISSION_ACROSS_CHEMICAL_SYNAPSES	REACTOME_TRANSMISSION_ACROSS_CHEMICAL_SYNAPSES	104	-0.42381	-1.4217	0.017392	0.812014	0.812014	510	tags=17%, list=8%, signal=16%	CAMK4/DLG2/CHRNA3/CACNB4/PPM1E/GRIN3A/LRRC7/PRKAR2B/GRIN2D/GABRG3/SLC18A2/TUBAL3/GABRA2/GABRQ/GRIK1/PPFIA2/GAD1/GABRB1
REACTOME_NEUTROPHIL_DEGRANULATION	REACTOME_NEUTROPHIL_DEGRANULATION	146	-0.38938	-1.35884	0.021345	0.812014	0.812014	344	tags=10%, list=6%, signal=10%	PADI2/BST1/PIGR/PSMA2/LRRC7/NME2/SELL/PRSS3/NFAM1/ARHGAP9/MIF/FGL2/ORM2/FCGR2A/FOLR3
REACTOME_NEURONAL_SYSTEM	REACTOME_NEURONAL_SYSTEM	148	-0.38678	-1.34984	0.021956	0.812014	0.812014	510	tags=18%, list=8%, signal=16%	CAMK4/DLG2/SLITRK2/BEGAIN/NLGN1/CHRNA3/CACNB4/KCNC3/PPM1E/GRIN3A/LRRC7/PRKAR2B/SLITRK6/GRIN2D/SLITRK1/KCNH1/GABRG3/SLC18A2/TUBAL3/GABRA2/KCNS1/GABRQ/GRIK1/PPFIA2/GAD1/GABRB1
REACTOME_SUMOYLATION	REACTOME_SUMOYLATION	67	0.514301	1.52299	0.025154	0.826652	0.826652	56	tags=4%, list=1%, signal=4%	NR1I2/AURKB/FOXL2
REACTOME_MRNA_CAPPING	REACTOME_MRNA_CAPPING	13	0.737926	1.6167	0.030353	0.844051	0.844051	25	tags=8%, list=0%, signal=8%	GTF2H4
REACTOME_SIGNALING_BY_TYPE_1_INSULIN_LIKE_GROWTH_FACTOR_1_RECEPTOR_IGF1R	REACTOME_SIGNALING_BY_TYPE_1_INSULIN_LIKE_GROWTH_FACTOR_1_RECEPTOR_IGF1R	15	-0.69438	-1.60501	0.028111	0.844051	0.844051	714	tags=40%, list=12%, signal=35%	IRS4/FGF2/THEM4/FGF5/KL/FGF17
REACTOME_CYTOSOLIC_SENSORS_OF_PATHOGEN_ASSOCIATED_DNA	REACTOME_CYTOSOLIC_SENSORS_OF_PATHOGEN_ASSOCIATED_DNA	26	0.621009	1.55397	0.029464	0.844051	0.844051	1	tags=4%, list=0%, signal=4%	CGAS
REACTOME_NEDDYLATION	REACTOME_NEDDYLATION	88	-0.43145	-1.40884	0.029681	0.844051	0.844051	1079	tags=20%, list=18%, signal=17%	DCAF16/PSMB8/UBE2D1/COMMD3/FEM1A/ASB14/KLHL11/FBXO41/FBXO10/KCTD6/FBXL13/FBXL7/FBXO4/PSMA2/FBXO15/ASB3/ASB12/SPSB3
REACTOME_NUCLEAR_SIGNALING_BY_ERBB4	REACTOME_NUCLEAR_SIGNALING_BY_ERBB4	12	0.732388	1.58142	0.035425	0.88318	0.88318	709	tags=25%, list=12%, signal=22%	NRG4/BTC/GFAP
REACTOME_IRS_MEDIATED_SIGNALLING	REACTOME_IRS_MEDIATED_SIGNALLING	14	-0.69063	-1.57267	0.035282	0.88318	0.88318	672	tags=36%, list=11%, signal=32%	FGF2/THEM4/FGF5/KL/FGF17
REACTOME_SIGNALING_BY_FGFR	REACTOME_SIGNALING_BY_FGFR	20	-0.61657	-1.54168	0.034868	0.88318	0.88318	672	tags=25%, list=11%, signal=22%	FGF2/ANOS1/FGF5/KL/FGF17
REACTOME_TRIGLYCERIDE_CATABOLISM	REACTOME_TRIGLYCERIDE_CATABOLISM	10	0.763869	1.59969	0.038224	0.921191	0.921191	73	tags=20%, list=1%, signal=20%	PLIN1/FABP7
REACTOME_SIGNALING_BY_INSULIN_RECEPTOR	REACTOME_SIGNALING_BY_INSULIN_RECEPTOR	23	-0.5915	-1.51723	0.041781	0.974447	0.974447	672	tags=30%, list=11%, signal=27%	FGF2/THEM4/ATP6V1E2/ATP6V1C2/FGF5/KL/FGF17
REACTOME_RNA_POLYMERASE_I_TRANSCRIPTION_INITIATION	REACTOME_RNA_POLYMERASE_I_TRANSCRIPTION_INITIATION	18	0.66664	1.57168	0.053211	0.979675	0.979675	25	tags=6%, list=0%, signal=6%	GTF2H4
REACTOME_HIV_TRANSCRIPTION_ELONGATION	REACTOME_HIV_TRANSCRIPTION_ELONGATION	15	0.694194	1.56488	0.048964	0.979675	0.979675	25	tags=7%, list=0%, signal=7%	GTF2H4
REACTOME_RNA_POLYMERASE_I_PROMOTER_ESCAPE	REACTOME_RNA_POLYMERASE_I_PROMOTER_ESCAPE	12	0.723477	1.56218	0.050093	0.979675	0.979675	25	tags=8%, list=0%, signal=8%	GTF2H4
REACTOME_SUMOYLATION_OF_INTRACELLULAR_RECEPTORS	REACTOME_SUMOYLATION_OF_INTRACELLULAR_RECEPTORS	11	0.729169	1.55504	0.052434	0.979675	0.979675	8	tags=9%, list=0%, signal=9%	NR1I2
REACTOME_GABA_SYNTHESIS_RELEASE_REUPTAKE_AND_DEGRADATION	REACTOME_GABA_SYNTHESIS_RELEASE_REUPTAKE_AND_DEGRADATION	11	-0.71384	-1.55032	0.055556	0.979675	0.979675	10	tags=36%, list=0%, signal=36%	SLC6A12/ABAT/RAB3A/GAD1
REACTOME_GAP_JUNCTION_ASSEMBLY	REACTOME_GAP_JUNCTION_ASSEMBLY	13	-0.68644	-1.54909	0.055085	0.979675	0.979675	424	tags=31%, list=7%, signal=29%	TUBB4A/GJB4/TUBAL3/GJB7
REACTOME_SIGNALING_BY_FGFR1	REACTOME_SIGNALING_BY_FGFR1	13	-0.68598	-1.54806	0.055085	0.979675	0.979675	672	tags=38%, list=11%, signal=34%	FGF2/ANOS1/FGF5/KL/FGF17
REACTOME_HSF1_DEPENDENT_TRANSACTIVATION	REACTOME_HSF1_DEPENDENT_TRANSACTIVATION	15	0.685958	1.54631	0.052731	0.979675	0.979675	512	tags=27%, list=9%, signal=24%	CAMK2B/HSPA6/HSPA2/CRYAB
REACTOME_ABC_FAMILY_PROTEINS_MEDIATED_TRANSPORT	REACTOME_ABC_FAMILY_PROTEINS_MEDIATED_TRANSPORT	33	-0.54143	-1.51383	0.046782	0.979675	0.979675	297	tags=12%, list=5%, signal=12%	ABCB4/PSMA2/ABCC11/ABCA8
REACTOME_O_LINKED_GLYCOSYLATION	REACTOME_O_LINKED_GLYCOSYLATION	37	0.559256	1.49493	0.04927	0.979675	0.979675	642	tags=32%, list=11%, signal=29%	MUC16/B3GNTL1/B3GNT3/MUC12/GALNT8/B3GNT7/ST3GAL3/B3GNT4/ADAMTS17/ADAMTSL4/B3GNT6/ST3GAL4
REACTOME_FORMATION_OF_THE_EARLY_ELONGATION_COMPLEX	REACTOME_FORMATION_OF_THE_EARLY_ELONGATION_COMPLEX	13	0.707291	1.54958	0.058491	1	1	25	tags=8%, list=0%, signal=8%	GTF2H4
REACTOME_TRANSCRIPTIONAL_REGULATION_OF_BROWN_AND_BEIGE_ADIPOCYTE_DIFFERENTIATION	REACTOME_TRANSCRIPTIONAL_REGULATION_OF_BROWN_AND_BEIGE_ADIPOCYTE_DIFFERENTIATION	11	-0.70612	-1.53355	0.070513	1	1	348	tags=18%, list=6%, signal=17%	ZNF423/EBF2
REACTOME_TRIGLYCERIDE_METABOLISM	REACTOME_TRIGLYCERIDE_METABOLISM	12	0.706892	1.52637	0.061224	1	1	73	tags=17%, list=1%, signal=16%	PLIN1/FABP7
REACTOME_FORMATION_OF_RNA_POL_II_ELONGATION_COMPLEX	REACTOME_FORMATION_OF_RNA_POL_II_ELONGATION_COMPLEX	18	0.644045	1.51841	0.06789	1	1	25	tags=6%, list=0%, signal=6%	GTF2H4
REACTOME_RNA_POLYMERASE_I_TRANSCRIPTION_TERMINATION	REACTOME_RNA_POLYMERASE_I_TRANSCRIPTION_TERMINATION	14	0.685678	1.51828	0.064272	1	1	25	tags=7%, list=0%, signal=7%	GTF2H4
REACTOME_INSULIN_RECEPTOR_SIGNALLING_CASCADE	REACTOME_INSULIN_RECEPTOR_SIGNALLING_CASCADE	16	-0.64472	-1.5122	0.068088	1	1	672	tags=31%, list=11%, signal=28%	FGF2/THEM4/FGF5/KL/FGF17
REACTOME_RNA_POLYMERASE_I_TRANSCRIPTION	REACTOME_RNA_POLYMERASE_I_TRANSCRIPTION	20	0.636815	1.50665	0.071429	1	1	25	tags=5%, list=0%, signal=5%	GTF2H4
REACTOME_O_LINKED_GLYCOSYLATION_OF_MUCINS	REACTOME_O_LINKED_GLYCOSYLATION_OF_MUCINS	25	0.605623	1.50301	0.074074	1	1	825	tags=44%, list=14%, signal=38%	MUC16/B3GNTL1/B3GNT3/MUC12/GALNT8/B3GNT7/ST3GAL3/B3GNT4/B3GNT6/ST3GAL4/MUC4
REACTOME_HIV_TRANSCRIPTION_INITIATION	REACTOME_HIV_TRANSCRIPTION_INITIATION	19	0.635998	1.50128	0.065666	1	1	25	tags=5%, list=0%, signal=5%	GTF2H4
REACTOME_DOWNREGULATION_OF_ERBB2_SIGNALING	REACTOME_DOWNREGULATION_OF_ERBB2_SIGNALING	10	0.712439	1.49199	0.07533	1	1	421	tags=20%, list=7%, signal=19%	NRG4/BTC
REACTOME_TRANSPORT_OF_VITAMINS_NUCLEOSIDES_AND_RELATED_MOLECULES	REACTOME_TRANSPORT_OF_VITAMINS_NUCLEOSIDES_AND_RELATED_MOLECULES	13	0.678677	1.48689	0.086792	1	1	520	tags=31%, list=9%, signal=28%	LCN12/SLCO1C1/ARL2BP/SLC27A1
REACTOME_NGF_STIMULATED_TRANSCRIPTION	REACTOME_NGF_STIMULATED_TRANSCRIPTION	22	-0.58284	-1.48075	0.068817	1	1	1000	tags=41%, list=17%, signal=34%	CDK5/CDK5R1/ID2/EGR1/EGR3/ARC/FOSB/EGR4/SH3GL3
REACTOME_GAP_JUNCTION_TRAFFICKING_AND_REGULATION	REACTOME_GAP_JUNCTION_TRAFFICKING_AND_REGULATION	16	-0.62678	-1.47012	0.075107	1	1	424	tags=25%, list=7%, signal=23%	TUBB4A/GJB4/TUBAL3/GJB7
REACTOME_SIGNALING_BY_ERBB2	REACTOME_SIGNALING_BY_ERBB2	14	0.66275	1.46751	0.090737	1	1	421	tags=14%, list=7%, signal=13%	NRG4/BTC
REACTOME_G_ALPHA_S_SIGNALLING_EVENTS	REACTOME_G_ALPHA_S_SIGNALLING_EVENTS	34	-0.52265	-1.46421	0.078091	1	1	785	tags=26%, list=13%, signal=23%	DRD1/GPBAR1/SCT/PTH1R/PDE8B/SCTR/PRKAR2B/CYSLTR2/HTR7
REACTOME_GLUCONEOGENESIS	REACTOME_GLUCONEOGENESIS	10	0.698215	1.4622	0.092279	1	1	1505	tags=70%, list=25%, signal=53%	FBP2/SLC37A2/ENO2/ALDOA/SLC37A4/PC/ALDOB
REACTOME_FCGAMMA_RECEPTOR_FCGR_DEPENDENT_PHAGOCYTOSIS	REACTOME_FCGAMMA_RECEPTOR_FCGR_DEPENDENT_PHAGOCYTOSIS	26	-0.55261	-1.45693	0.076754	1	1	59	tags=12%, list=1%, signal=11%	CDC42/CD3G/FCGR2A
REACTOME_TRANSCRIPTION_OF_THE_HIV_GENOME	REACTOME_TRANSCRIPTION_OF_THE_HIV_GENOME	25	0.57493	1.42684	0.116667	1	1	25	tags=4%, list=0%, signal=4%	GTF2H4
REACTOME_PHASE_0_RAPID_DEPOLARISATION	REACTOME_PHASE_0_RAPID_DEPOLARISATION	10	0.674545	1.41263	0.126177	1	1	451	tags=40%, list=7%, signal=37%	SCN5A/SCN1B/CAMK2B/CACNB2
REACTOME_SLC_TRANSPORTER_DISORDERS	REACTOME_SLC_TRANSPORTER_DISORDERS	33	0.543106	1.41214	0.093284	1	1	474	tags=15%, list=8%, signal=14%	SLC6A2/SLC39A4/SLC5A2/SLC3A1/GCK
REACTOME_FORMATION_OF_INCISION_COMPLEX_IN_GG_NER	REACTOME_FORMATION_OF_INCISION_COMPLEX_IN_GG_NER	21	0.594465	1.4118	0.109228	1	1	25	tags=5%, list=0%, signal=5%	GTF2H4
REACTOME_CELL_CELL_COMMUNICATION	REACTOME_CELL_CELL_COMMUNICATION	48	-0.47587	-1.40124	0.066815	1	1	311	tags=12%, list=5%, signal=12%	CDH11/ARHGEF6/ILK/HEYL/CDH13/NPHS1
REACTOME_TP53_REGULATES_TRANSCRIPTION_OF_DNA_REPAIR_GENES	REACTOME_TP53_REGULATES_TRANSCRIPTION_OF_DNA_REPAIR_GENES	21	0.589396	1.39976	0.114878	1	1	355	tags=10%, list=6%, signal=9%	GTF2H4/FANCD2
REACTOME_NUCLEAR_EVENTS_KINASE_AND_TRANSCRIPTION_FACTOR_ACTIVATION	REACTOME_NUCLEAR_EVENTS_KINASE_AND_TRANSCRIPTION_FACTOR_ACTIVATION	33	-0.49938	-1.39627	0.103004	1	1	1000	tags=33%, list=17%, signal=28%	MEF2C/CDK5/CDK5R1/ID2/EGR1/VRK3/EGR3/ARC/FOSB/EGR4/SH3GL3
REACTOME_DUAL_INCISION_IN_GG_NER	REACTOME_DUAL_INCISION_IN_GG_NER	19	0.590389	1.39362	0.12758	1	1	1003	tags=26%, list=17%, signal=22%	GTF2H4/POLD4/RFC3/ERCC1/GTF2H3
REACTOME_MEIOTIC_SYNAPSIS	REACTOME_MEIOTIC_SYNAPSIS	12	0.644134	1.39086	0.142857	1	1	401	tags=17%, list=7%, signal=16%	SYCP2/HSPA2
REACTOME_SIGNALING_BY_ERBB4	REACTOME_SIGNALING_BY_ERBB4	18	-0.57457	-1.38889	0.111597	1	1	93	tags=17%, list=2%, signal=16%	GABRG3/GABRQ/GABRB1
REACTOME_NEUROTRANSMITTER_RELEASE_CYCLE	REACTOME_NEUROTRANSMITTER_RELEASE_CYCLE	22	-0.54633	-1.38798	0.12043	1	1	92	tags=14%, list=2%, signal=13%	SLC18A2/PPFIA2/GAD1
REACTOME_REGULATION_OF_PTEN_GENE_TRANSCRIPTION	REACTOME_REGULATION_OF_PTEN_GENE_TRANSCRIPTION	20	-0.55319	-1.38321	0.131915	1	1	38	tags=15%, list=1%, signal=15%	RRAGC/EGR1/NR2E1
REACTOME_NEGATIVE_EPIGENETIC_REGULATION_OF_RRNA_EXPRESSION	REACTOME_NEGATIVE_EPIGENETIC_REGULATION_OF_RRNA_EXPRESSION	24	0.56024	1.3749	0.134686	1	1	25	tags=4%, list=0%, signal=4%	GTF2H4
REACTOME_REGULATION_OF_EXPRESSION_OF_SLITS_AND_ROBOS	REACTOME_REGULATION_OF_EXPRESSION_OF_SLITS_AND_ROBOS	35	0.522277	1.36967	0.107345	1	1	189	tags=6%, list=3%, signal=6%	LHX4/SLIT1
REACTOME_RNA_POLYMERASE_II_PRE_TRANSCRIPTION_EVENTS	REACTOME_RNA_POLYMERASE_II_PRE_TRANSCRIPTION_EVENTS	27	0.543953	1.36458	0.130515	1	1	25	tags=4%, list=0%, signal=4%	GTF2H4
REACTOME_TRANSCRIPTIONAL_REGULATION_OF_WHITE_ADIPOCYTE_DIFFERENTIATION	REACTOME_TRANSCRIPTIONAL_REGULATION_OF_WHITE_ADIPOCYTE_DIFFERENTIATION	16	0.596767	1.36139	0.156716	1	1	49	tags=6%, list=1%, signal=6%	PLIN1
REACTOME_SUMOYLATION_OF_TRANSCRIPTION_FACTORS	REACTOME_SUMOYLATION_OF_TRANSCRIPTION_FACTORS	10	0.648221	1.3575	0.165725	1	1	296	tags=20%, list=5%, signal=19%	FOXL2/TFAP2C
REACTOME_FORMATION_OF_TC_NER_PRE_INCISION_COMPLEX	REACTOME_FORMATION_OF_TC_NER_PRE_INCISION_COMPLEX	22	0.560815	1.35155	0.148976	1	1	25	tags=5%, list=0%, signal=5%	GTF2H4
REACTOME_ADHERENS_JUNCTIONS_INTERACTIONS	REACTOME_ADHERENS_JUNCTIONS_INTERACTIONS	13	-0.59882	-1.35135	0.158898	1	1	514	tags=23%, list=9%, signal=21%	CDH11/HEYL/CDH13
REACTOME_DIFFERENTIATION_OF_KERATINOCYTES_IN_INTERFOLLICULAR_EPIDERMIS_IN_MAMMALIAN_SKIN	REACTOME_DIFFERENTIATION_OF_KERATINOCYTES_IN_INTERFOLLICULAR_EPIDERMIS_IN_MAMMALIAN_SKIN	12	-0.60936	-1.34712	0.168467	1	1	238	tags=17%, list=4%, signal=16%	PRSS3/KLK7
REACTOME_NONHOMOLOGOUS_END_JOINING_NHEJ	REACTOME_NONHOMOLOGOUS_END_JOINING_NHEJ	17	-0.56451	-1.34366	0.151515	1	1	37	tags=29%, list=1%, signal=29%	MRE11/PAXIP1/BARD1/BABAM2/NHEJ1
REACTOME_SIGNALING_BY_EGFR	REACTOME_SIGNALING_BY_EGFR	18	-0.55546	-1.34269	0.159737	1	1	216	tags=11%, list=4%, signal=11%	ADAM12/SH3GL3
REACTOME_INTEGRIN_CELL_SURFACE_INTERACTIONS	REACTOME_INTEGRIN_CELL_SURFACE_INTERACTIONS	30	-0.49038	-1.34186	0.128205	1	1	431	tags=27%, list=7%, signal=25%	ICAM5/SPP1/COL8A1/ITGA8/COL9A3/ITGA10/JAM2/VCAM1
REACTOME_REGULATION_OF_GENE_EXPRESSION_IN_BETA_CELLS	REACTOME_REGULATION_OF_GENE_EXPRESSION_IN_BETA_CELLS	10	-0.62216	-1.34138	0.195329	1	1	21	tags=30%, list=0%, signal=30%	AKT3/NKX2-2/MAFA
REACTOME_DOPAMINE_NEUROTRANSMITTER_RELEASE_CYCLE	REACTOME_DOPAMINE_NEUROTRANSMITTER_RELEASE_CYCLE	12	-0.60538	-1.33832	0.177106	1	1	92	tags=42%, list=2%, signal=41%	LIN7A/RAB3A/APBA1/SLC18A2/PPFIA2
REACTOME_SIGNALING_BY_FGFR2	REACTOME_SIGNALING_BY_FGFR2	14	-0.5842	-1.33032	0.171247	1	1	113	tags=21%, list=2%, signal=21%	FGF2/FGF5/FGF17
REACTOME_THE_PHOTOTRANSDUCTION_CASCADE	REACTOME_THE_PHOTOTRANSDUCTION_CASCADE	11	0.623692	1.3301	0.196629	1	1	605	tags=27%, list=10%, signal=25%	GUCY2D/GUCA1A/PPEF1
REACTOME_IMMUNOREGULATORY_INTERACTIONS_BETWEEN_A_LYMPHOID_AND_A_NON_LYMPHOID_CELL	REACTOME_IMMUNOREGULATORY_INTERACTIONS_BETWEEN_A_LYMPHOID_AND_A_NON_LYMPHOID_CELL	16	-0.56656	-1.32888	0.165236	1	1	645	tags=62%, list=11%, signal=56%	HLA-F/MICB/CD200/ULBP1/IFITM1/ICAM5/PILRB/SELL/VCAM1/CD3G
REACTOME_SENSORY_PERCEPTION	REACTOME_SENSORY_PERCEPTION	72	0.442953	1.32824	0.087566	1	1	626	tags=18%, list=10%, signal=16%	OTOGL/TAS2R5/HSD17B6/SYN1/GUCY2D/USH1G/SCN1B/CDH23/GUCA1A/CACNB2/ABCA4/PPEF1/RDH5
REACTOME_NUCLEAR_RECEPTOR_TRANSCRIPTION_PATHWAY	REACTOME_NUCLEAR_RECEPTOR_TRANSCRIPTION_PATHWAY	19	0.562147	1.32695	0.166979	1	1	356	tags=21%, list=6%, signal=20%	NR1I2/RXRG/RARB/NR1I3
REACTOME_SOMITOGENESIS	REACTOME_SOMITOGENESIS	19	-0.53158	-1.31611	0.170576	1	1	1077	tags=53%, list=18%, signal=43%	PSMD8/PSMD12/PSMD13/EPHA4/PSMB8/NOTCH1/TBX6/DLL3/LEF1/PSMA2
REACTOME_COMPLEMENT_CASCADE	REACTOME_COMPLEMENT_CASCADE	13	0.600519	1.31566	0.196226	1	1	221	tags=15%, list=4%, signal=15%	CFH/C4B
REACTOME_FGFR1_MUTANT_RECEPTOR_ACTIVATION	REACTOME_FGFR1_MUTANT_RECEPTOR_ACTIVATION	12	-0.59414	-1.31347	0.196544	1	1	113	tags=25%, list=2%, signal=25%	FGF2/FGF5/FGF17
REACTOME_SIGNALING_BY_FGFR1_IN_DISEASE	REACTOME_SIGNALING_BY_FGFR1_IN_DISEASE	12	-0.59414	-1.31347	0.196544	1	1	113	tags=25%, list=2%, signal=25%	FGF2/FGF5/FGF17
REACTOME_PRE_NOTCH_EXPRESSION_AND_PROCESSING	REACTOME_PRE_NOTCH_EXPRESSION_AND_PROCESSING	12	0.606446	1.30948	0.19666	1	1	727	tags=42%, list=12%, signal=37%	MFNG/ST3GAL3/E2F1/ST3GAL4/RFNG
REACTOME_SENSORY_PROCESSING_OF_SOUND	REACTOME_SENSORY_PROCESSING_OF_SOUND	26	0.520587	1.30268	0.175824	1	1	451	tags=19%, list=7%, signal=18%	OTOGL/SYN1/USH1G/CDH23/CACNB2
REACTOME_NEUROTRANSMITTER_RECEPTORS_AND_POSTSYNAPTIC_SIGNAL_TRANSMISSION	REACTOME_NEUROTRANSMITTER_RECEPTORS_AND_POSTSYNAPTIC_SIGNAL_TRANSMISSION	79	-0.4065	-1.29779	0.095349	1	1	510	tags=18%, list=8%, signal=16%	CAMK4/DLG2/CHRNA3/PPM1E/GRIN3A/LRRC7/PRKAR2B/GRIN2D/GABRG3/TUBAL3/GABRA2/GABRQ/GRIK1/GABRB1
REACTOME_FORMATION_OF_PARAXIAL_MESODERM	REACTOME_FORMATION_OF_PARAXIAL_MESODERM	20	-0.51806	-1.29537	0.195745	1	1	1077	tags=50%, list=18%, signal=41%	PSMD8/PSMD12/PSMD13/EPHA4/PSMB8/NOTCH1/TBX6/DLL3/LEF1/PSMA2
REACTOME_ASSEMBLY_AND_CELL_SURFACE_PRESENTATION_OF_NMDA_RECEPTORS	REACTOME_ASSEMBLY_AND_CELL_SURFACE_PRESENTATION_OF_NMDA_RECEPTORS	21	-0.51012	-1.2915	0.201699	1	1	946	tags=48%, list=16%, signal=40%	DLG3/LIN7A/TUBB4A/GRIN2A/APBA1/DLG2/GRIN3A/LRRC7/GRIN2D/TUBAL3
REACTOME_TRANSCRIPTIONAL_ACTIVATION_OF_MITOCHONDRIAL_BIOGENESIS	REACTOME_TRANSCRIPTIONAL_ACTIVATION_OF_MITOCHONDRIAL_BIOGENESIS	15	-0.55581	-1.28473	0.212314	1	1	1144	tags=53%, list=19%, signal=43%	MEF2C/CRTC1/SIRT3/SMARCD3/GLUD2/MTERF1/NR1D1/CAMK4
REACTOME_SUMOYLATION_OF_DNA_REPLICATION_PROTEINS	REACTOME_SUMOYLATION_OF_DNA_REPLICATION_PROTEINS	19	0.541106	1.27729	0.204503	1	1	524	tags=11%, list=9%, signal=10%	AURKB/BIRC5
REACTOME_PEPTIDE_LIGAND_BINDING_RECEPTORS	REACTOME_PEPTIDE_LIGAND_BINDING_RECEPTORS	43	0.464175	1.27145	0.147541	1	1	641	tags=30%, list=11%, signal=27%	RXFP4/APLN/PPY/CX3CL1/KISS1/CCKBR/TRH/TAC1/CXCL10/OXT/PYY/ACKR2/F2RL2
REACTOME_SIGNALING_BY_RETINOIC_ACID	REACTOME_SIGNALING_BY_RETINOIC_ACID	22	0.525932	1.26749	0.197393	1	1	626	tags=23%, list=10%, signal=20%	RXRG/RARB/SDR16C5/CYP26B1/RDH5
REACTOME_ACTIVATION_OF_KAINATE_RECEPTORS_UPON_GLUTAMATE_BINDING	REACTOME_ACTIVATION_OF_KAINATE_RECEPTORS_UPON_GLUTAMATE_BINDING	10	-0.58591	-1.26323	0.244161	1	1	28	tags=20%, list=0%, signal=20%	GRIK5/GRIK1
REACTOME_G_ALPHA_I_SIGNALLING_EVENTS	REACTOME_G_ALPHA_I_SIGNALLING_EVENTS	84	0.413253	1.25404	0.130742	1	1	598	tags=19%, list=10%, signal=17%	RXFP4/APLN/PPY/TAS2R5/CX3CL1/HCAR3/GNA14/CAMK2B/HCAR2/ADRA2C/RGS19/RGS11/CXCL10/HTR1E/RGS7/PYY
REACTOME_REGULATION_OF_BETA_CELL_DEVELOPMENT	REACTOME_REGULATION_OF_BETA_CELL_DEVELOPMENT	14	-0.54993	-1.25228	0.247357	1	1	21	tags=36%, list=0%, signal=36%	AKT3/ONECUT1/NKX2-2/NOTCH1/MAFA
REACTOME_DUAL_INCISION_IN_TC_NER	REACTOME_DUAL_INCISION_IN_TC_NER	26	0.497844	1.24577	0.20696	1	1	1003	tags=19%, list=17%, signal=16%	GTF2H4/POLD4/RFC3/ERCC1/GTF2H3
REACTOME_CELL_SURFACE_INTERACTIONS_AT_THE_VASCULAR_WALL	REACTOME_CELL_SURFACE_INTERACTIONS_AT_THE_VASCULAR_WALL	39	-0.43806	-1.24568	0.182819	1	1	482	tags=18%, list=8%, signal=17%	ESAM/VPREB3/SLC7A10/ANGPT1/SELL/MIF/JAM2
REACTOME_ION_CHANNEL_TRANSPORT	REACTOME_ION_CHANNEL_TRANSPORT	53	-0.40927	-1.23747	0.165563	1	1	926	tags=28%, list=15%, signal=24%	PDZD11/MCOLN3/TTYH2/ATP10A/TRPV3/ATP6V1E2/ANO4/ATP8A2/CLCNKB/ASIC2/SLN/TRPV4/RYR2/ATP6V1C2/BEST4
REACTOME_AMINE_LIGAND_BINDING_RECEPTORS	REACTOME_AMINE_LIGAND_BINDING_RECEPTORS	11	-0.56957	-1.237	0.271368	1	1	385	tags=55%, list=6%, signal=51%	DRD2/DRD1/CHRM4/DRD4/HTR1D/HTR7
REACTOME_FOXO_MEDIATED_TRANSCRIPTION_OF_OXIDATIVE_STRESS_METABOLIC_AND_NEURONAL_GENES	REACTOME_FOXO_MEDIATED_TRANSCRIPTION_OF_OXIDATIVE_STRESS_METABOLIC_AND_NEURONAL_GENES	11	0.578204	1.23309	0.254682	1	1	799	tags=27%, list=13%, signal=24%	IGFBP1/GCK/INS
REACTOME_SENSORY_PROCESSING_OF_SOUND_BY_OUTER_HAIR_CELLS_OF_THE_COCHLEA	REACTOME_SENSORY_PROCESSING_OF_SOUND_BY_OUTER_HAIR_CELLS_OF_THE_COCHLEA	19	0.521502	1.23101	0.255159	1	1	253	tags=16%, list=4%, signal=15%	OTOGL/USH1G/CDH23
REACTOME_EPHA_MEDIATED_GROWTH_CONE_COLLAPSE	REACTOME_EPHA_MEDIATED_GROWTH_CONE_COLLAPSE	13	-0.54415	-1.22799	0.28178	1	1	1162	tags=38%, list=19%, signal=31%	EFNA3/EFNA5/EPHA5/EPHA6/MYH11
REACTOME_KERATINIZATION	REACTOME_KERATINIZATION	13	0.559879	1.22662	0.279245	1	1	490	tags=31%, list=8%, signal=28%	EVPL/KRTAP5-1/SPINK5/KRT15
REACTOME_MITOTIC_SPINDLE_CHECKPOINT	REACTOME_MITOTIC_SPINDLE_CHECKPOINT	41	0.451281	1.22603	0.194495	1	1	524	tags=17%, list=9%, signal=16%	AURKB/DYNC1I1/CENPP/CENPE/ANAPC15/CENPL/BIRC5
REACTOME_TIGHT_JUNCTION_INTERACTIONS	REACTOME_TIGHT_JUNCTION_INTERACTIONS	10	0.581925	1.21866	0.26177	1	1	434	tags=20%, list=7%, signal=19%	CLDN11/CLDN19
REACTOME_APC_C_MEDIATED_DEGRADATION_OF_CELL_CYCLE_PROTEINS	REACTOME_APC_C_MEDIATED_DEGRADATION_OF_CELL_CYCLE_PROTEINS	26	0.486897	1.21837	0.234432	1	1	713	tags=15%, list=12%, signal=14%	AURKB/ANAPC15/CDK1/PTTG1
REACTOME_SIGNALING_BY_NUCLEAR_RECEPTORS	REACTOME_SIGNALING_BY_NUCLEAR_RECEPTORS	73	0.405238	1.21566	0.198606	1	1	626	tags=14%, list=10%, signal=12%	RXRG/PLIN1/RARB/SDR16C5/BTC/MMP2/CYP26B1/KAT5/GPS2/RDH5
REACTOME_NUCLEOTIDE_CATABOLISM	REACTOME_NUCLEOTIDE_CATABOLISM	16	-0.5176	-1.21405	0.261803	1	1	1274	tags=56%, list=21%, signal=44%	UPB1/NT5C3A/SAMHD1/NT5E/ENTPD8/ENTPD2/NT5M/ADPRM/AGXT2
REACTOME_GPCR_LIGAND_BINDING	REACTOME_GPCR_LIGAND_BINDING	98	0.390699	1.21103	0.146853	1	1	666	tags=28%, list=11%, signal=25%	RXFP4/APLN/WNT7B/PPY/TAS2R5/CX3CL1/HCAR3/WNT7A/CHRM5/KISS1/GPR68/CCKBR/HCAR2/FFAR2/TRH/ADRA2C/FZD2/GCGR/CRHR2/TAC1/CXCL10/OXT/HTR1E/PYY/ACKR2/F2RL2/P2RY2
REACTOME_APC_C_CDH1_MEDIATED_DEGRADATION_OF_CDC20_AND_OTHER_APC_C_CDH1_TARGETED_PROTEINS_IN_LATE_MITOSIS_EARLY_G1	REACTOME_APC_C_CDH1_MEDIATED_DEGRADATION_OF_CDC20_AND_OTHER_APC_C_CDH1_TARGETED_PROTEINS_IN_LATE_MITOSIS_EARLY_G1	22	0.501448	1.20848	0.247672	1	1	334	tags=9%, list=6%, signal=9%	AURKB/ANAPC15
REACTOME_METABOLISM_OF_CARBOHYDRATES	REACTOME_METABOLISM_OF_CARBOHYDRATES	111	0.378237	1.20765	0.148148	1	1	649	tags=15%, list=11%, signal=14%	PFKFB1/LYVE1/FBP2/SLC37A2/UST/ACAN/B3GNT3/B3GNT7/ST3GAL3/B3GNT4/PHKG1/FUT6/LUM/GCK/KHK/ST3GAL4/HAS3
REACTOME_STIMULI_SENSING_CHANNELS	REACTOME_STIMULI_SENSING_CHANNELS	33	-0.43128	-1.20586	0.225322	1	1	841	tags=27%, list=14%, signal=24%	MCOLN3/TTYH2/TRPV3/ANO4/CLCNKB/ASIC2/TRPV4/RYR2/BEST4
REACTOME_MATURATION_OF_SPIKE_PROTEIN	REACTOME_MATURATION_OF_SPIKE_PROTEIN	16	0.52847	1.20558	0.281716	1	1	642	tags=25%, list=11%, signal=22%	MGAT4C/ST3GAL3/ZDHHC11/ST3GAL4
REACTOME_CELL_JUNCTION_ORGANIZATION	REACTOME_CELL_JUNCTION_ORGANIZATION	35	-0.42742	-1.20515	0.227176	1	1	514	tags=14%, list=9%, signal=13%	CDH11/ARHGEF6/ILK/HEYL/CDH13
REACTOME_CELLULAR_HEXOSE_TRANSPORT	REACTOME_CELLULAR_HEXOSE_TRANSPORT	11	0.56385	1.20248	0.277154	1	1	284	tags=27%, list=5%, signal=26%	SLC5A9/SLC2A7/SLC5A2
REACTOME_SIGNALING_BY_NTRKS	REACTOME_SIGNALING_BY_NTRKS	51	-0.40221	-1.20243	0.190265	1	1	1000	tags=24%, list=17%, signal=20%	CDK5/NTF3/CDK5R1/ID2/EGR1/VRK3/EGR3/TIAM1/ARC/FOSB/EGR4/SH3GL3
REACTOME_POST_CHAPERONIN_TUBULIN_FOLDING_PATHWAY	REACTOME_POST_CHAPERONIN_TUBULIN_FOLDING_PATHWAY	11	-0.55356	-1.20223	0.282051	1	1	893	tags=27%, list=15%, signal=23%	TUBB4A/TBCE/TUBAL3
REACTOME_ACTIVATION_OF_NMDA_RECEPTORS_AND_POSTSYNAPTIC_EVENTS	REACTOME_ACTIVATION_OF_NMDA_RECEPTORS_AND_POSTSYNAPTIC_EVENTS	41	-0.4139	-1.20113	0.231947	1	1	946	tags=29%, list=16%, signal=25%	LIN7A/TUBB4A/GRIN2A/APBA1/CAMK4/DLG2/PPM1E/GRIN3A/LRRC7/PRKAR2B/GRIN2D/TUBAL3
REACTOME_METABOLISM_OF_STEROID_HORMONES	REACTOME_METABOLISM_OF_STEROID_HORMONES	10	0.57322	1.20043	0.27307	1	1	96	tags=10%, list=2%, signal=10%	TSPO
REACTOME_GLUTAMATE_NEUROTRANSMITTER_RELEASE_CYCLE	REACTOME_GLUTAMATE_NEUROTRANSMITTER_RELEASE_CYCLE	11	-0.5522	-1.19929	0.286325	1	1	14	tags=18%, list=0%, signal=18%	RAB3A/PPFIA2
REACTOME_ATTENUATION_PHASE	REACTOME_ATTENUATION_PHASE	13	0.547188	1.19881	0.298113	1	1	401	tags=15%, list=7%, signal=14%	HSPA6/HSPA2
REACTOME_PYROPTOSIS	REACTOME_PYROPTOSIS	12	-0.53912	-1.19184	0.302376	1	1	563	tags=67%, list=9%, signal=61%	CHMP4C/CHMP3/CHMP4B/CHMP2B/CASP3/CASP4/IL1A/CASP5
REACTOME_INFECTION_WITH_MYCOBACTERIUM_TUBERCULOSIS	REACTOME_INFECTION_WITH_MYCOBACTERIUM_TUBERCULOSIS	10	0.569022	1.19164	0.278719	1	1	936	tags=30%, list=16%, signal=25%	MRC1/VPS33B/LTF
REACTOME_HEDGEHOG_LIGAND_BIOGENESIS	REACTOME_HEDGEHOG_LIGAND_BIOGENESIS	17	-0.49966	-1.18929	0.277056	1	1	297	tags=41%, list=5%, signal=39%	PSMD8/UBC/PSMD12/PSMD13/PSMB8/PSMA2/GPC5
REACTOME_EGR2_AND_SOX10_MEDIATED_INITIATION_OF_SCHWANN_CELL_MYELINATION	REACTOME_EGR2_AND_SOX10_MEDIATED_INITIATION_OF_SCHWANN_CELL_MYELINATION	12	-0.53733	-1.18788	0.308855	1	1	700	tags=25%, list=12%, signal=22%	ADGRV1/LAMA2/POU3F1
REACTOME_GENE_SILENCING_BY_RNA	REACTOME_GENE_SILENCING_BY_RNA	19	-0.47621	-1.17902	0.285714	1	1	157	tags=32%, list=3%, signal=31%	NUP93/NUP133/POLR2F/NUP54/PIWIL4/PIWIL2
REACTOME_INTRINSIC_PATHWAY_OF_FIBRIN_CLOT_FORMATION	REACTOME_INTRINSIC_PATHWAY_OF_FIBRIN_CLOT_FORMATION	11	0.551754	1.17668	0.299625	1	1	44	tags=9%, list=1%, signal=9%	KLKB1
REACTOME_SIGNALING_BY_FGFR_IN_DISEASE	REACTOME_SIGNALING_BY_FGFR_IN_DISEASE	19	-0.47499	-1.176	0.292111	1	1	113	tags=16%, list=2%, signal=16%	FGF2/FGF5/FGF17
REACTOME_TRANSPORT_OF_CONNEXONS_TO_THE_PLASMA_MEMBRANE	REACTOME_TRANSPORT_OF_CONNEXONS_TO_THE_PLASMA_MEMBRANE	10	-0.54352	-1.17183	0.318471	1	1	73	tags=20%, list=1%, signal=20%	TUBB4A/TUBAL3
REACTOME_PTEN_REGULATION	REACTOME_PTEN_REGULATION	40	-0.40903	-1.17135	0.257778	1	1	297	tags=15%, list=5%, signal=14%	AKT3/PSMB8/RRAGC/EGR1/PSMA2/NR2E1
REACTOME_FORMATION_OF_TUBULIN_FOLDING_INTERMEDIATES_BY_CCT_TRIC	REACTOME_FORMATION_OF_TUBULIN_FOLDING_INTERMEDIATES_BY_CCT_TRIC	11	-0.53774	-1.16788	0.314103	1	1	73	tags=18%, list=1%, signal=18%	TUBB4A/TUBAL3
REACTOME_DNA_REPAIR	REACTOME_DNA_REPAIR	124	0.358119	1.16378	0.191275	1	1	826	tags=12%, list=14%, signal=11%	INO80B/GTF2H4/RTEL1/NEIL1/FANCD2/XRCC3/EME1/NTHL1/KAT5/FANCI/POLD4/RFC3/FANCE/GEN1/USP43
REACTOME_NEUREXINS_AND_NEUROLIGINS	REACTOME_NEUREXINS_AND_NEUROLIGINS	24	-0.44869	-1.16233	0.273913	1	1	1121	tags=42%, list=19%, signal=34%	DLG3/SYT10/LIN7A/GRIN2A/APBA1/NLGN4X/DLG2/BEGAIN/NLGN1/GRIN2D
REACTOME_NS1_MEDIATED_EFFECTS_ON_HOST_PATHWAYS	REACTOME_NS1_MEDIATED_EFFECTS_ON_HOST_PATHWAYS	13	0.526485	1.15346	0.349057	1	1	119	tags=8%, list=2%, signal=8%	KPNA7
REACTOME_ATF4_ACTIVATES_GENES_IN_RESPONSE_TO_ENDOPLASMIC_RETICULUM_STRESS	REACTOME_ATF4_ACTIVATES_GENES_IN_RESPONSE_TO_ENDOPLASMIC_RETICULUM_STRESS	12	0.532372	1.14953	0.330241	1	1	75	tags=8%, list=1%, signal=8%	IGFBP1
REACTOME_CLASS_A_1_RHODOPSIN_LIKE_RECEPTORS	REACTOME_CLASS_A_1_RHODOPSIN_LIKE_RECEPTORS	71	0.383494	1.14666	0.273997	1	1	666	tags=30%, list=11%, signal=27%	RXFP4/APLN/PPY/CX3CL1/HCAR3/CHRM5/KISS1/GPR68/CCKBR/HCAR2/FFAR2/TRH/ADRA2C/TAC1/CXCL10/OXT/HTR1E/PYY/ACKR2/F2RL2/P2RY2
REACTOME_FORMATION_OF_THE_CORNIFIED_ENVELOPE	REACTOME_FORMATION_OF_THE_CORNIFIED_ENVELOPE	12	0.530815	1.14617	0.330241	1	1	490	tags=25%, list=8%, signal=23%	EVPL/SPINK5/KRT15
REACTOME_INTEGRATION_OF_ENERGY_METABOLISM	REACTOME_INTEGRATION_OF_ENERGY_METABOLISM	42	0.420789	1.14522	0.260073	1	1	799	tags=19%, list=13%, signal=17%	PFKFB1/GNA14/ADRA2C/GCGR/CACNB2/KCNB1/ADCY9/INS
REACTOME_EXTRACELLULAR_MATRIX_ORGANIZATION	REACTOME_EXTRACELLULAR_MATRIX_ORGANIZATION	105	-0.34078	-1.14455	0.201439	1	1	241	tags=18%, list=4%, signal=18%	CTSV/FGF2/EFEMP2/MFAP2/PCOLCE2/CTSK/ICAM5/SPP1/ADAM12/COL8A1/LAMA2/ITGA8/COL9A3/CAPN3/CAPN11/ITGA10/JAM2/VCAM1/KLK7
REACTOME_MATERNAL_TO_ZYGOTIC_TRANSITION_MZT	REACTOME_MATERNAL_TO_ZYGOTIC_TRANSITION_MZT	16	0.500776	1.14241	0.330224	1	1	562	tags=12%, list=9%, signal=11%	UHRF1/TEAD4
REACTOME_SIGNALING_BY_GPCR	REACTOME_SIGNALING_BY_GPCR	177	0.336702	1.14149	0.193811	1	1	483	tags=15%, list=8%, signal=14%	RXFP4/APLN/WNT7B/PPY/TAS2R5/CX3CL1/HCAR3/GNA14/WNT7A/CHRM5/KISS1/GPR68/CAMK2B/CCKBR/HCAR2/FFAR2/TRH/ADRA2C/FZD2/GCGR/RGS19/CRHR2/TAC1/RGS11/CXCL10/OXT
REACTOME_METABOLISM_OF_POLYAMINES	REACTOME_METABOLISM_OF_POLYAMINES	16	-0.48666	-1.14146	0.315451	1	1	297	tags=44%, list=5%, signal=42%	OAZ1/PSMD8/PSMD12/PSMD13/PSMB8/PSMA2/AZIN2
REACTOME_COOPERATION_OF_PREFOLDIN_AND_TRIC_CCT_IN_ACTIN_AND_TUBULIN_FOLDING	REACTOME_COOPERATION_OF_PREFOLDIN_AND_TRIC_CCT_IN_ACTIN_AND_TUBULIN_FOLDING	12	-0.51593	-1.14057	0.332613	1	1	73	tags=17%, list=1%, signal=16%	TUBB4A/TUBAL3
REACTOME_RESPONSE_TO_ELEVATED_PLATELET_CYTOSOLIC_CA2	REACTOME_RESPONSE_TO_ELEVATED_PLATELET_CYTOSOLIC_CA2	40	-0.3982	-1.14032	0.291111	1	1	368	tags=12%, list=6%, signal=12%	SYTL4/SERPINA4/F8/VEGFC/ORM2
REACTOME_HEMOSTASIS	REACTOME_HEMOSTASIS	193	-0.31254	-1.13053	0.188889	1	1	482	tags=12%, list=8%, signal=11%	ESAM/PLA2G4A/VPREB3/SLC7A10/SYTL4/KIF18B/SERPINA4/GATA3/KIF26A/PRKAR2B/NOS3/ANGPT1/SELL/F8/GUCY1B1/RAPGEF3/MIF/ITGA10/VEGFC/JAM2/TUBAL3/NFE2/ORM2
REACTOME_MITOCHONDRIAL_FATTY_ACID_BETA_OXIDATION	REACTOME_MITOCHONDRIAL_FATTY_ACID_BETA_OXIDATION	14	0.510443	1.13026	0.361059	1	1	46	tags=7%, list=1%, signal=7%	ACAD11
REACTOME_TRANSPORT_OF_BILE_SALTS_AND_ORGANIC_ACIDS_METAL_IONS_AND_AMINE_COMPOUNDS	REACTOME_TRANSPORT_OF_BILE_SALTS_AND_ORGANIC_ACIDS_METAL_IONS_AND_AMINE_COMPOUNDS	28	0.444796	1.13002	0.297248	1	1	171	tags=11%, list=3%, signal=10%	SLC6A2/SLC22A2/SLC39A4
REACTOME_DISORDERS_OF_TRANSMEMBRANE_TRANSPORTERS	REACTOME_DISORDERS_OF_TRANSMEMBRANE_TRANSPORTERS	53	0.395703	1.12875	0.29326	1	1	474	tags=9%, list=8%, signal=9%	SLC6A2/SLC39A4/SLC5A2/SLC3A1/GCK
REACTOME_SIALIC_ACID_METABOLISM	REACTOME_SIALIC_ACID_METABOLISM	11	-0.51836	-1.12579	0.333333	1	1	237	tags=36%, list=4%, signal=35%	ST6GALNAC4/ST8SIA5/ST8SIA4/ST6GALNAC6
REACTOME_SIGNALING_BY_WNT	REACTOME_SIGNALING_BY_WNT	74	0.373263	1.12561	0.290657	1	1	150	tags=4%, list=2%, signal=4%	WNT7B/RSPO3/WNT7A
REACTOME_PLATELET_HOMEOSTASIS	REACTOME_PLATELET_HOMEOSTASIS	23	-0.43827	-1.1242	0.341357	1	1	543	tags=17%, list=9%, signal=16%	SLC8A2/PLA2G4A/NOS3/GUCY1B1
REACTOME_SLC_MEDIATED_TRANSMEMBRANE_TRANSPORT	REACTOME_SLC_MEDIATED_TRANSMEMBRANE_TRANSPORT	90	0.367081	1.12416	0.276896	1	1	284	tags=10%, list=5%, signal=10%	SLC6A2/LCN12/SLCO1C1/SLC22A2/SLC5A9/ARL2BP/SLC2A7/SLC39A4/SLC5A2
REACTOME_TRANSCRIPTION_COUPLED_NUCLEOTIDE_EXCISION_REPAIR_TC_NER	REACTOME_TRANSCRIPTION_COUPLED_NUCLEOTIDE_EXCISION_REPAIR_TC_NER	35	0.427505	1.12113	0.308851	1	1	1430	tags=26%, list=24%, signal=20%	GTF2H4/POLD4/RFC3/ERCC1/GTF2H3/COPS7A/XPA/ISY1/XRCC1
REACTOME_G0_AND_EARLY_G1	REACTOME_G0_AND_EARLY_G1	12	0.51852	1.11962	0.363636	1	1	938	tags=42%, list=16%, signal=35%	E2F1/CDK1/CDC25A/CDC6/LIN54
REACTOME_DISEASES_ASSOCIATED_WITH_GLYCOSAMINOGLYCAN_METABOLISM	REACTOME_DISEASES_ASSOCIATED_WITH_GLYCOSAMINOGLYCAN_METABOLISM	18	-0.46189	-1.11651	0.341357	1	1	168	tags=22%, list=3%, signal=22%	GPC2/CHST6/GPC5/PRELP
REACTOME_ARACHIDONIC_ACID_METABOLISM	REACTOME_ARACHIDONIC_ACID_METABOLISM	18	0.473032	1.11523	0.365138	1	1	383	tags=22%, list=6%, signal=21%	LTC4S/ALOX15B/ALOXE3/CYP2J2
REACTOME_SIGNALING_BY_ROBO_RECEPTORS	REACTOME_SIGNALING_BY_ROBO_RECEPTORS	54	0.389497	1.11488	0.3	1	1	189	tags=4%, list=3%, signal=4%	LHX4/SLIT1
REACTOME_GLYCOSAMINOGLYCAN_METABOLISM	REACTOME_GLYCOSAMINOGLYCAN_METABOLISM	50	0.392086	1.11487	0.308108	1	1	819	tags=24%, list=14%, signal=21%	LYVE1/UST/ACAN/B3GNT3/B3GNT7/ST3GAL3/B3GNT4/LUM/ST3GAL4/HAS3/CHST1/SGSH
REACTOME_CELL_CELL_JUNCTION_ORGANIZATION	REACTOME_CELL_CELL_JUNCTION_ORGANIZATION	23	-0.43407	-1.11343	0.354486	1	1	161	tags=13%, list=3%, signal=13%	CDH11/HEYL/CDH13
REACTOME_PERK_REGULATES_GENE_EXPRESSION	REACTOME_PERK_REGULATES_GENE_EXPRESSION	13	0.507731	1.11237	0.379245	1	1	75	tags=8%, list=1%, signal=8%	IGFBP1
REACTOME_GLYCOSPHINGOLIPID_BIOSYNTHESIS	REACTOME_GLYCOSPHINGOLIPID_BIOSYNTHESIS	10	-0.5149	-1.11013	0.360934	1	1	846	tags=40%, list=14%, signal=34%	GAL3ST1/FUT1/ST8SIA5/ST6GALNAC6
REACTOME_RHO_GTPASES_ACTIVATE_WASPS_AND_WAVES	REACTOME_RHO_GTPASES_ACTIVATE_WASPS_AND_WAVES	13	0.506478	1.10962	0.381132	1	1	156	tags=8%, list=3%, signal=8%	WAS
REACTOME_DEGRADATION_OF_THE_EXTRACELLULAR_MATRIX	REACTOME_DEGRADATION_OF_THE_EXTRACELLULAR_MATRIX	45	-0.3768	-1.10749	0.313175	1	1	241	tags=16%, list=4%, signal=15%	CTSK/SPP1/COL8A1/COL9A3/CAPN3/CAPN11/KLK7
REACTOME_MITOCHONDRIAL_BIOGENESIS	REACTOME_MITOCHONDRIAL_BIOGENESIS	25	-0.42192	-1.10528	0.361472	1	1	1574	tags=52%, list=26%, signal=39%	APOOL/PPARGC1A/CHCHD6/PRKAA2/MEF2C/CRTC1/SIRT3/SMARCD3/TMEM11/GLUD2/MTERF1/NR1D1/CAMK4
REACTOME_DEFECTIVE_EXT2_CAUSES_EXOSTOSES_2	REACTOME_DEFECTIVE_EXT2_CAUSES_EXOSTOSES_2	10	-0.51264	-1.10526	0.36518	1	1	1336	tags=30%, list=22%, signal=23%	GPC4/GPC2/GPC5
REACTOME_TRANSLATION_OF_SARS_COV_2_STRUCTURAL_PROTEINS	REACTOME_TRANSLATION_OF_SARS_COV_2_STRUCTURAL_PROTEINS	23	0.451024	1.10493	0.354128	1	1	1310	tags=30%, list=22%, signal=24%	MGAT4C/ST3GAL3/ZDHHC11/ST3GAL4/PARP16/MOGS/MGAT5
REACTOME_CROSSLINKING_OF_COLLAGEN_FIBRILS	REACTOME_CROSSLINKING_OF_COLLAGEN_FIBRILS	10	0.52663	1.10287	0.363465	1	1	1339	tags=50%, list=22%, signal=39%	COL4A3/LOXL2/LOX/COL4A1/COL4A2
REACTOME_METABOLISM_OF_NUCLEOTIDES	REACTOME_METABOLISM_OF_NUCLEOTIDES	40	-0.38433	-1.10062	0.335556	1	1	922	tags=28%, list=15%, signal=23%	SAMHD1/NT5E/ENTPD8/ENTPD2/AK9/NT5M/ADPRM/NUDT13/GMPR/NME2/AGXT2
REACTOME_CELLULAR_RESPONSE_TO_STARVATION	REACTOME_CELLULAR_RESPONSE_TO_STARVATION	27	-0.4123	-1.09906	0.355895	1	1	1559	tags=44%, list=26%, signal=33%	RPS23/ATP6V0E1/BMT2/RPL14/ATP6V1H/RPL39L/RRAGC/DDIT3/RPL26L1/ATP6V1E2/SESN1/ATP6V1C2
REACTOME_REGULATION_OF_ENDOGENOUS_RETROELEMENTS	REACTOME_REGULATION_OF_ENDOGENOUS_RETROELEMENTS	28	-0.4072	-1.09894	0.334792	1	1	1760	tags=50%, list=29%, signal=36%	MBD3/ZCCHC8/ZNF669/ZNF28/ZNF708/BCL7B/ZNF354A/ZNF331/ZNF816/ZNF382/SMARCD3/ZNF425/ZNF136/PIWIL4
REACTOME_INTERLEUKIN_3_INTERLEUKIN_5_AND_GM_CSF_SIGNALING	REACTOME_INTERLEUKIN_3_INTERLEUKIN_5_AND_GM_CSF_SIGNALING	15	-0.47365	-1.09481	0.373673	1	1	1496	tags=40%, list=25%, signal=30%	JAK1/BLNK/PIK3CD/STAT5B/PIK3R3/IL3RA
REACTOME_CARBOXYTERMINAL_POST_TRANSLATIONAL_MODIFICATIONS_OF_TUBULIN	REACTOME_CARBOXYTERMINAL_POST_TRANSLATIONAL_MODIFICATIONS_OF_TUBULIN	18	-0.45259	-1.09401	0.358862	1	1	1125	tags=33%, list=19%, signal=27%	VASH2/TUBB4A/TTLL3/TTLL6/TTLL2/TUBAL3
REACTOME_SYNTHESIS_OF_PIPS_AT_THE_PLASMA_MEMBRANE	REACTOME_SYNTHESIS_OF_PIPS_AT_THE_PLASMA_MEMBRANE	23	-0.42609	-1.09296	0.371991	1	1	1286	tags=30%, list=21%, signal=24%	RAB4A/PIK3CD/SYNJ1/PIK3R5/PIK3R3/INPP5J/PLEKHA2
REACTOME_CELLULAR_RESPONSE_TO_HEAT_STRESS	REACTOME_CELLULAR_RESPONSE_TO_HEAT_STRESS	34	0.418094	1.09204	0.343808	1	1	512	tags=12%, list=9%, signal=11%	CAMK2B/HSPA6/HSPA2/CRYAB
REACTOME_FORMATION_OF_FIBRIN_CLOT_CLOTTING_CASCADE	REACTOME_FORMATION_OF_FIBRIN_CLOT_CLOTTING_CASCADE	15	0.484385	1.09192	0.389831	1	1	44	tags=7%, list=1%, signal=7%	KLKB1
REACTOME_TRANSCRIPTIONAL_REGULATION_BY_TP53	REACTOME_TRANSCRIPTIONAL_REGULATION_BY_TP53	120	0.337459	1.09185	0.288591	1	1	750	tags=9%, list=12%, signal=8%	GTF2H4/AURKB/GLS2/POU4F1/FANCD2/BIRC5/KAT5/E2F1/CDK1/FANCI/RFC3
REACTOME_TRANSCRIPTION_OF_E2F_TARGETS_UNDER_NEGATIVE_CONTROL_BY_DREAM_COMPLEX	REACTOME_TRANSCRIPTION_OF_E2F_TARGETS_UNDER_NEGATIVE_CONTROL_BY_DREAM_COMPLEX	10	0.520539	1.09011	0.372881	1	1	938	tags=40%, list=16%, signal=34%	E2F1/CDC25A/CDC6/LIN54
REACTOME_DISEASES_OF_CARBOHYDRATE_METABOLISM	REACTOME_DISEASES_OF_CARBOHYDRATE_METABOLISM	12	0.504682	1.08974	0.391466	1	1	1822	tags=67%, list=30%, signal=47%	KHK/SGSH/GYS1/GUSB/SLC37A4/ALDOB/EPM2A/HGSNAT
REACTOME_G_PROTEIN_BETA_GAMMA_SIGNALLING	REACTOME_G_PROTEIN_BETA_GAMMA_SIGNALLING	10	-0.50423	-1.08712	0.380042	1	1	1924	tags=60%, list=32%, signal=41%	GNG7/GNB5/CDC42/AKT3/PIK3R5/ARHGEF6
REACTOME_RHO_GTPASES_ACTIVATE_IQGAPS	REACTOME_RHO_GTPASES_ACTIVATE_IQGAPS	12	-0.4917	-1.087	0.367171	1	1	73	tags=25%, list=1%, signal=25%	CDC42/TUBB4A/TUBAL3
REACTOME_HS_GAG_BIOSYNTHESIS	REACTOME_HS_GAG_BIOSYNTHESIS	14	-0.4769	-1.08597	0.369979	1	1	1336	tags=29%, list=22%, signal=22%	GPC4/GPC2/HS3ST5/GPC5
REACTOME_CARGO_RECOGNITION_FOR_CLATHRIN_MEDIATED_ENDOCYTOSIS	REACTOME_CARGO_RECOGNITION_FOR_CLATHRIN_MEDIATED_ENDOCYTOSIS	39	-0.38109	-1.08368	0.35022	1	1	59	tags=18%, list=1%, signal=18%	SLC2A8/REPS2/CD4/KIAA0319/STON1/CD3G/SH3GL3
REACTOME_KERATAN_SULFATE_BIOSYNTHESIS	REACTOME_KERATAN_SULFATE_BIOSYNTHESIS	14	0.488579	1.08185	0.395085	1	1	714	tags=57%, list=12%, signal=50%	ACAN/B3GNT3/B3GNT7/ST3GAL3/B3GNT4/LUM/ST3GAL4/CHST1
REACTOME_G_ALPHA_Q_SIGNALLING_EVENTS	REACTOME_G_ALPHA_Q_SIGNALLING_EVENTS	57	0.373304	1.0807	0.356631	1	1	743	tags=25%, list=12%, signal=22%	GNA14/CHRM5/KISS1/GPR68/CCKBR/FFAR2/TRH/GCGR/RGS19/TAC1/OXT/F2RL2/P2RY2/GAST
REACTOME_ACTIVATION_OF_AMPK_DOWNSTREAM_OF_NMDARS	REACTOME_ACTIVATION_OF_AMPK_DOWNSTREAM_OF_NMDARS	15	-0.46705	-1.07956	0.386412	1	1	73	tags=20%, list=1%, signal=20%	PRKAA2/TUBB4A/TUBAL3
REACTOME_LATE_SARS_COV_2_INFECTION_EVENTS	REACTOME_LATE_SARS_COV_2_INFECTION_EVENTS	27	0.429674	1.0779	0.380515	1	1	1310	tags=33%, list=22%, signal=26%	MGAT4C/ST3GAL3/ZDHHC11/ST3GAL4/ANO7/ANO2/PARP16/MOGS/MGAT5
REACTOME_SIGNALING_BY_PDGF	REACTOME_SIGNALING_BY_PDGF	25	-0.41124	-1.07731	0.396104	1	1	452	tags=16%, list=8%, signal=15%	PDGFD/THBS4/SPP1/COL9A3
REACTOME_DISEASES_ASSOCIATED_WITH_O_GLYCOSYLATION_OF_PROTEINS	REACTOME_DISEASES_ASSOCIATED_WITH_O_GLYCOSYLATION_OF_PROTEINS	15	0.4779	1.0773	0.404896	1	1	825	tags=33%, list=14%, signal=29%	MUC16/MUC12/ADAMTS17/ADAMTSL4/MUC4
REACTOME_DEVELOPMENTAL_BIOLOGY	REACTOME_DEVELOPMENTAL_BIOLOGY	331	-0.27675	-1.07201	0.238938	1	1	535	tags=10%, list=9%, signal=9%	EPHA5/NPM2/LEF1/TIAM1/EPHA6/MYRIP/GMPR/KRT20/CACNB4/IRX2/ZNF423/MYH11/MEIS1/GATA3/PSMA2/PRSS3/ST8SIA4/LAMA2/ITGA8/SEMA4A/COL9A3/ITGA10/POU3F1/GFI1/TUBAL3/DOK5/EBF2/KRT80/MAFA/KLK7/NOTO/PAX3
REACTOME_SURFACTANT_METABOLISM	REACTOME_SURFACTANT_METABOLISM	11	0.501741	1.07002	0.391386	1	1	873	tags=36%, list=15%, signal=31%	ADRA2C/NAPSA/P2RY2/ABCA3
REACTOME_RESOLUTION_OF_D_LOOP_STRUCTURES	REACTOME_RESOLUTION_OF_D_LOOP_STRUCTURES	20	0.451775	1.06886	0.409774	1	1	1181	tags=35%, list=20%, signal=28%	RTEL1/XRCC3/EME1/KAT5/GEN1/EXO1/DNA2
REACTOME_CLASS_B_2_SECRETIN_FAMILY_RECEPTORS	REACTOME_CLASS_B_2_SECRETIN_FAMILY_RECEPTORS	23	0.435473	1.06683	0.394495	1	1	458	tags=22%, list=8%, signal=20%	WNT7B/WNT7A/FZD2/GCGR/CRHR2
REACTOME_ADRENALINE_NORADRENALINE_INHIBITS_INSULIN_SECRETION	REACTOME_ADRENALINE_NORADRENALINE_INHIBITS_INSULIN_SECRETION	10	0.508635	1.06518	0.40678	1	1	451	tags=20%, list=7%, signal=19%	ADRA2C/CACNB2
REACTOME_FACTORS_INVOLVED_IN_MEGAKARYOCYTE_DEVELOPMENT_AND_PLATELET_PRODUCTION	REACTOME_FACTORS_INVOLVED_IN_MEGAKARYOCYTE_DEVELOPMENT_AND_PLATELET_PRODUCTION	56	-0.34903	-1.06442	0.383929	1	1	354	tags=21%, list=6%, signal=20%	KIF27/CDK5/TUBB4A/KLC3/RAD51C/KIF2C/KIF18B/GATA3/KIF26A/PRKAR2B/TUBAL3/NFE2
REACTOME_AMINO_ACIDS_REGULATE_MTORC1	REACTOME_AMINO_ACIDS_REGULATE_MTORC1	13	-0.47162	-1.0643	0.398305	1	1	1480	tags=54%, list=25%, signal=41%	ATP6V0E1/BMT2/ATP6V1H/RRAGC/ATP6V1E2/SESN1/ATP6V1C2
REACTOME_MEIOTIC_RECOMBINATION	REACTOME_MEIOTIC_RECOMBINATION	11	-0.48989	-1.06396	0.399573	1	1	45	tags=18%, list=1%, signal=18%	RAD51C/DMC1
REACTOME_CHROMATIN_MODIFYING_ENZYMES	REACTOME_CHROMATIN_MODIFYING_ENZYMES	78	-0.33296	-1.06252	0.347222	1	1	2	tags=4%, list=0%, signal=4%	PADI3/PADI2/PAX3
REACTOME_CHROMOSOME_MAINTENANCE	REACTOME_CHROMOSOME_MAINTENANCE	37	0.397405	1.06229	0.395985	1	1	784	tags=19%, list=13%, signal=17%	RTEL1/CENPP/CENPL/CENPW/POLD4/RFC3/CENPO
REACTOME_CARGO_TRAFFICKING_TO_THE_PERICILIARY_MEMBRANE	REACTOME_CARGO_TRAFFICKING_TO_THE_PERICILIARY_MEMBRANE	14	0.479309	1.06132	0.41966	1	1	1150	tags=21%, list=19%, signal=17%	BBS1/BBIP1/PKD1
REACTOME_THE_ROLE_OF_GTSE1_IN_G2_M_PROGRESSION_AFTER_G2_CHECKPOINT	REACTOME_THE_ROLE_OF_GTSE1_IN_G2_M_PROGRESSION_AFTER_G2_CHECKPOINT	24	-0.40794	-1.05678	0.419565	1	1	297	tags=17%, list=5%, signal=16%	PSMB8/TUBB4A/PSMA2/TUBAL3
REACTOME_REGULATION_OF_RUNX3_EXPRESSION_AND_ACTIVITY	REACTOME_REGULATION_OF_RUNX3_EXPRESSION_AND_ACTIVITY	16	-0.4504	-1.05641	0.403433	1	1	2061	tags=50%, list=34%, signal=33%	PSMD8/UBC/PSMD12/PSMD13/SMURF2/MDM2/PSMB8/PSMA2
REACTOME_ADAPTIVE_IMMUNE_SYSTEM	REACTOME_ADAPTIVE_IMMUNE_SYSTEM	246	-0.28121	-1.05555	0.295393	1	1	712	tags=20%, list=12%, signal=18%	HLA-F/AP1S2/PSMB8/MICB/UBE2D1/PRKN/UBE2E2/CD200/CTSC/CD4/PIK3R3/HECTD2/TUBB4A/KLC3/ASB14/KLHL11/FBXO41/FBXO10/CTSV/KIF2C/ANAPC10/ULBP1/THEM4/IFITM1/BTN1A1/KCTD6/CTSK/CD274/CD101/FBXL13/ICAM5/NFATC1/HLA-DOA/FBXL7/MAP3K8/PILRB/FBXO4/KIF26A/PSMA2/FBXO15/SELL/TLR6/RAPGEF3/ASB3/TUBAL3/VCAM1/CD3G/ASB12
REACTOME_UNFOLDED_PROTEIN_RESPONSE_UPR	REACTOME_UNFOLDED_PROTEIN_RESPONSE_UPR	34	0.400228	1.04538	0.406654	1	1	1894	tags=41%, list=31%, signal=28%	IGFBP1/DCP2/NFYA/TATDN2/ASNS/PPP2R5B/DDX11/GOSR2/EIF2S3/CREB3L4/ACADVL/LMNA/ARFGAP1/CREB3L1
REACTOME_SIGNALING_BY_NOTCH	REACTOME_SIGNALING_BY_NOTCH	56	0.362671	1.04536	0.397112	1	1	744	tags=16%, list=12%, signal=14%	FABP7/MFNG/ST3GAL3/HEY2/DNER/E2F1/ST3GAL4/RFNG/HDAC11
REACTOME_SIGNALING_BY_MET	REACTOME_SIGNALING_BY_MET	26	-0.39552	-1.04278	0.41886	1	1	323	tags=12%, list=5%, signal=11%	MUC20/LAMA2/SH3GL3
REACTOME_ANTIGEN_PROCESSING_UBIQUITINATION_PROTEASOME_DEGRADATION	REACTOME_ANTIGEN_PROCESSING_UBIQUITINATION_PROTEASOME_DEGRADATION	111	-0.30827	-1.04118	0.370098	1	1	1077	tags=16%, list=18%, signal=14%	PSMB8/UBE2D1/PRKN/UBE2E2/HECTD2/ASB14/KLHL11/FBXO41/FBXO10/ANAPC10/KCTD6/FBXL13/FBXL7/FBXO4/PSMA2/FBXO15/ASB3/ASB12
REACTOME_HIV_LIFE_CYCLE	REACTOME_HIV_LIFE_CYCLE	57	0.358977	1.03922	0.408602	1	1	25	tags=2%, list=0%, signal=2%	GTF2H4
REACTOME_GLUCAGON_LIKE_PEPTIDE_1_GLP1_REGULATES_INSULIN_SECRETION	REACTOME_GLUCAGON_LIKE_PEPTIDE_1_GLP1_REGULATES_INSULIN_SECRETION	13	-0.4594	-1.03674	0.442797	1	1	272	tags=23%, list=5%, signal=22%	AKAP5/PRKAR2B/RAPGEF3
REACTOME_RESOLUTION_OF_D_LOOP_STRUCTURES_THROUGH_SYNTHESIS_DEPENDENT_STRAND_ANNEALING_SDSA	REACTOME_RESOLUTION_OF_D_LOOP_STRUCTURES_THROUGH_SYNTHESIS_DEPENDENT_STRAND_ANNEALING_SDSA	14	0.467641	1.03549	0.434783	1	1	567	tags=21%, list=9%, signal=19%	RTEL1/XRCC3/KAT5
REACTOME_DEUBIQUITINATION	REACTOME_DEUBIQUITINATION	82	0.340152	1.03212	0.424084	1	1	2	tags=1%, list=0%, signal=1%	INO80B
REACTOME_G1_S_SPECIFIC_TRANSCRIPTION	REACTOME_G1_S_SPECIFIC_TRANSCRIPTION	13	0.470559	1.03093	0.435849	1	1	938	tags=38%, list=16%, signal=33%	E2F1/CDK1/CDC25A/CDC6/LIN54
REACTOME_ISG15_ANTIVIRAL_MECHANISM	REACTOME_ISG15_ANTIVIRAL_MECHANISM	23	0.419929	1.02875	0.431193	1	1	473	tags=9%, list=8%, signal=8%	KPNA7/HERC5
REACTOME_KERATAN_SULFATE_KERATIN_METABOLISM	REACTOME_KERATAN_SULFATE_KERATIN_METABOLISM	17	0.444337	1.02824	0.453704	1	1	714	tags=47%, list=12%, signal=42%	ACAN/B3GNT3/B3GNT7/ST3GAL3/B3GNT4/LUM/ST3GAL4/CHST1
REACTOME_PEROXISOMAL_LIPID_METABOLISM	REACTOME_PEROXISOMAL_LIPID_METABOLISM	14	-0.45128	-1.02765	0.435518	1	1	1306	tags=50%, list=22%, signal=39%	AMACR/SLC25A17/HACL1/EHHADH/SLC27A2/CROT/ACBD4
REACTOME_CYTOSOLIC_SULFONATION_OF_SMALL_MOLECULES	REACTOME_CYTOSOLIC_SULFONATION_OF_SMALL_MOLECULES	11	-0.47288	-1.02701	0.438034	1	1	731	tags=45%, list=12%, signal=40%	SULT1B1/PAPSS1/SULT1E1/SULT4A1/SULT1C4
REACTOME_SIGNALING_BY_NOTCH3	REACTOME_SIGNALING_BY_NOTCH3	14	0.463536	1.0264	0.440454	1	1	379	tags=14%, list=6%, signal=13%	FABP7/HEY2
REACTOME_METABOLIC_DISORDERS_OF_BIOLOGICAL_OXIDATION_ENZYMES	REACTOME_METABOLIC_DISORDERS_OF_BIOLOGICAL_OXIDATION_ENZYMES	10	0.489518	1.02515	0.446328	1	1	1353	tags=50%, list=22%, signal=39%	CYP26B1/CYP2R1/CYP27B1/CYP27A1/OPLAH
REACTOME_PARASITE_INFECTION	REACTOME_PARASITE_INFECTION	20	-0.4098	-1.02469	0.438298	1	1	59	tags=10%, list=1%, signal=10%	CDC42/CD3G
REACTOME_INTERLEUKIN_12_SIGNALING	REACTOME_INTERLEUKIN_12_SIGNALING	14	0.462032	1.02307	0.440454	1	1	260	tags=14%, list=4%, signal=14%	IL12A/BOLA2
REACTOME_DISASSEMBLY_OF_THE_DESTRUCTION_COMPLEX_AND_RECRUITMENT_OF_AXIN_TO_THE_MEMBRANE	REACTOME_DISASSEMBLY_OF_THE_DESTRUCTION_COMPLEX_AND_RECRUITMENT_OF_AXIN_TO_THE_MEMBRANE	10	0.487656	1.02125	0.451977	1	1	2228	tags=60%, list=37%, signal=38%	FZD2/DVL1/PPP2R5B/DVL2/FZD1/CSNK1A1
REACTOME_NUCLEOTIDE_BINDING_DOMAIN_LEUCINE_RICH_REPEAT_CONTAINING_RECEPTOR_NLR_SIGNALING_PATHWAYS	REACTOME_NUCLEOTIDE_BINDING_DOMAIN_LEUCINE_RICH_REPEAT_CONTAINING_RECEPTOR_NLR_SIGNALING_PATHWAYS	18	-0.42192	-1.01988	0.437637	1	1	563	tags=11%, list=9%, signal=10%	CASP4/AIM2
REACTOME_PI_METABOLISM	REACTOME_PI_METABOLISM	34	-0.36398	-1.01968	0.438178	1	1	1286	tags=29%, list=21%, signal=23%	RAB4A/GDPD1/PI4KB/PIK3CD/SYNJ1/PIK3R5/PIK3R3/INPP5J/MTMR7/PLEKHA2
REACTOME_TP53_REGULATES_METABOLIC_GENES	REACTOME_TP53_REGULATES_METABOLIC_GENES	16	0.446415	1.0184	0.445896	1	1	91	tags=6%, list=2%, signal=6%	GLS2
REACTOME_DEGRADATION_OF_AXIN	REACTOME_DEGRADATION_OF_AXIN	15	-0.44048	-1.01814	0.450106	1	1	2061	tags=47%, list=34%, signal=31%	PSMD8/UBC/PSMD12/PSMD13/SMURF2/PSMB8/PSMA2
REACTOME_CD28_CO_STIMULATION	REACTOME_CD28_CO_STIMULATION	12	-0.4604	-1.0178	0.453564	1	1	1283	tags=42%, list=21%, signal=33%	CDC42/AKT3/PIK3R3/THEM4/MAP3K8
REACTOME_NICOTINATE_METABOLISM	REACTOME_NICOTINATE_METABOLISM	12	-0.46012	-1.01719	0.453564	1	1	913	tags=42%, list=15%, signal=35%	NMNAT1/NT5E/NMNAT3/PTGIS/BST1
REACTOME_EXTENSION_OF_TELOMERES	REACTOME_EXTENSION_OF_TELOMERES	20	0.429408	1.01594	0.464286	1	1	750	tags=15%, list=12%, signal=13%	RTEL1/POLD4/RFC3
REACTOME_RUNX1_REGULATES_TRANSCRIPTION_OF_GENES_INVOLVED_IN_DIFFERENTIATION_OF_HSCS	REACTOME_RUNX1_REGULATES_TRANSCRIPTION_OF_GENES_INVOLVED_IN_DIFFERENTIATION_OF_HSCS	20	-0.40514	-1.01302	0.453191	1	1	308	tags=40%, list=5%, signal=38%	PSMD8/UBC/PSMD12/PSMD13/TCF12/PSMB8/GATA3/PSMA2
REACTOME_RA_BIOSYNTHESIS_PATHWAY	REACTOME_RA_BIOSYNTHESIS_PATHWAY	11	0.47434	1.01159	0.460674	1	1	626	tags=27%, list=10%, signal=24%	SDR16C5/CYP26B1/RDH5
REACTOME_RESOLUTION_OF_ABASIC_SITES_AP_SITES	REACTOME_RESOLUTION_OF_ABASIC_SITES_AP_SITES	20	0.425933	1.00772	0.477444	1	1	750	tags=20%, list=12%, signal=18%	NEIL1/NTHL1/POLD4/RFC3
REACTOME_HS_GAG_DEGRADATION	REACTOME_HS_GAG_DEGRADATION	13	-0.44653	-1.00767	0.463983	1	1	1336	tags=38%, list=22%, signal=30%	GPC4/HPSE/GPC2/GLB1L2/GPC5
REACTOME_CLATHRIN_MEDIATED_ENDOCYTOSIS	REACTOME_CLATHRIN_MEDIATED_ENDOCYTOSIS	54	-0.33032	-1.00365	0.455752	1	1	59	tags=15%, list=1%, signal=15%	SLC2A8/REPS2/SYNJ1/CD4/KIAA0319/STON1/CD3G/SH3GL3
REACTOME_POTASSIUM_CHANNELS	REACTOME_POTASSIUM_CHANNELS	30	0.392106	1.00113	0.473783	1	1	739	tags=30%, list=12%, signal=26%	KCNV2/KCNK13/KCNAB1/KCNG3/KCNJ14/KCNG1/KCNJ5/KCNB1/KCNC4
REACTOME_SIGNALING_BY_ALK_IN_CANCER	REACTOME_SIGNALING_BY_ALK_IN_CANCER	23	-0.38984	-0.99997	0.466083	1	1	2715	tags=74%, list=45%, signal=41%	TFG/DCTN1/RB1/CUL1/PIK3CB/HDAC1/GCC2/SQSTM1/JUN/STAT1/UBC/ATIC/MDM2/MECP2/NOTCH1/FOXM1/ALK
REACTOME_STABILIZATION_OF_P53	REACTOME_STABILIZATION_OF_P53	16	-0.42443	-0.9955	0.469957	1	1	2061	tags=44%, list=34%, signal=29%	PSMD8/UBC/PSMD12/PSMD13/MDM2/PSMB8/PSMA2
REACTOME_TRAFFICKING_OF_AMPA_RECEPTORS	REACTOME_TRAFFICKING_OF_AMPA_RECEPTORS	12	0.46094	0.995293	0.471243	1	1	712	tags=25%, list=12%, signal=22%	CAMK2B/DLG4/GRIA4
REACTOME_A_TETRASACCHARIDE_LINKER_SEQUENCE_IS_REQUIRED_FOR_GAG_SYNTHESIS	REACTOME_A_TETRASACCHARIDE_LINKER_SEQUENCE_IS_REQUIRED_FOR_GAG_SYNTHESIS	11	-0.4581	-0.99491	0.465812	1	1	1336	tags=27%, list=22%, signal=21%	GPC4/GPC2/GPC5
REACTOME_HDR_THROUGH_HOMOLOGOUS_RECOMBINATION_HRR	REACTOME_HDR_THROUGH_HOMOLOGOUS_RECOMBINATION_HRR	34	0.380182	0.99302	0.49353	1	1	779	tags=21%, list=13%, signal=18%	RTEL1/XRCC3/EME1/KAT5/POLD4/RFC3/GEN1
REACTOME_EPIGENETIC_REGULATION_OF_GENE_EXPRESSION	REACTOME_EPIGENETIC_REGULATION_OF_GENE_EXPRESSION	75	0.330797	0.991751	0.491197	1	1	70	tags=3%, list=1%, signal=3%	GTF2H4/UHRF1
REACTOME_INTERCONVERSION_OF_NUCLEOTIDE_DI_AND_TRIPHOSPHATES	REACTOME_INTERCONVERSION_OF_NUCLEOTIDE_DI_AND_TRIPHOSPHATES	11	-0.45552	-0.9893	0.470085	1	1	526	tags=27%, list=9%, signal=25%	AK9/NUDT13/NME2
REACTOME_ESTROGEN_DEPENDENT_GENE_EXPRESSION	REACTOME_ESTROGEN_DEPENDENT_GENE_EXPRESSION	26	-0.37522	-0.98925	0.486842	1	1	495	tags=31%, list=8%, signal=28%	KPNA2/PRMT1/CXXC5/POLR2F/USF1/KCTD6/GATA3/FOSB
REACTOME_EPH_EPHRIN_MEDIATED_REPULSION_OF_CELLS	REACTOME_EPH_EPHRIN_MEDIATED_REPULSION_OF_CELLS	26	-0.37491	-0.98843	0.489035	1	1	1162	tags=35%, list=19%, signal=28%	AP2S1/EFNA3/EPHB1/EPHB6/EFNB3/EFNA5/EPHA5/TIAM1/EPHA6
REACTOME_PEPTIDE_HORMONE_METABOLISM	REACTOME_PEPTIDE_HORMONE_METABOLISM	25	-0.3769	-0.98733	0.484848	1	1	569	tags=24%, list=9%, signal=22%	ACE/INHBA/GPR119/MYRIP/PCSK2/UCN
REACTOME_REGULATION_OF_ENDOGENOUS_RETROELEMENTS_BY_PIWI_INTERACTING_RNAS_PIRNAS	REACTOME_REGULATION_OF_ENDOGENOUS_RETROELEMENTS_BY_PIWI_INTERACTING_RNAS_PIRNAS	12	-0.44632	-0.98669	0.479482	1	1	157	tags=25%, list=3%, signal=24%	BCL7B/SMARCD3/PIWIL4
REACTOME_COSTIMULATION_BY_THE_CD28_FAMILY	REACTOME_COSTIMULATION_BY_THE_CD28_FAMILY	26	-0.37336	-0.98436	0.491228	1	1	924	tags=31%, list=15%, signal=26%	CDC42/AKT3/CD4/PIK3R3/THEM4/CD274/MAP3K8/CD3G
REACTOME_TRANSPORT_OF_INORGANIC_CATIONS_ANIONS_AND_AMINO_ACIDS_OLIGOPEPTIDES	REACTOME_TRANSPORT_OF_INORGANIC_CATIONS_ANIONS_AND_AMINO_ACIDS_OLIGOPEPTIDES	41	-0.33884	-0.9833	0.455142	1	1	1050	tags=22%, list=17%, signal=18%	SLC4A3/SLC7A3/SLC34A2/SLC6A15/SLC4A4/SLC8A2/SLC24A3/SLC7A10/SLC15A3
REACTOME_VISUAL_PHOTOTRANSDUCTION	REACTOME_VISUAL_PHOTOTRANSDUCTION	37	0.36784	0.983264	0.498175	1	1	626	tags=16%, list=10%, signal=15%	HSD17B6/GUCY2D/GUCA1A/ABCA4/PPEF1/RDH5
REACTOME_RHOF_GTPASE_CYCLE	REACTOME_RHOF_GTPASE_CYCLE	20	0.413636	0.978627	0.511278	1	1	2066	tags=55%, list=34%, signal=36%	SRGAP2/MCAM/AKAP12/FAM169A/BAIAP2L2/DIAPH3/SLC4A7/VANGL1/SOWAHC/MYO9B/ARHGAP1
REACTOME_INTERLEUKIN_2_FAMILY_SIGNALING	REACTOME_INTERLEUKIN_2_FAMILY_SIGNALING	14	-0.42958	-0.97823	0.490486	1	1	243	tags=43%, list=4%, signal=41%	JAK1/PIK3CD/STAT5B/PIK3R3/HAVCR2/IL3RA
REACTOME_DEGRADATION_OF_GLI1_BY_THE_PROTEASOME	REACTOME_DEGRADATION_OF_GLI1_BY_THE_PROTEASOME	14	-0.42929	-0.97755	0.4926	1	1	2061	tags=43%, list=34%, signal=28%	PSMD8/UBC/PSMD12/PSMD13/PSMB8/PSMA2
REACTOME_SCF_BETA_TRCP_MEDIATED_DEGRADATION_OF_EMI1	REACTOME_SCF_BETA_TRCP_MEDIATED_DEGRADATION_OF_EMI1	14	-0.42929	-0.97755	0.4926	1	1	2061	tags=43%, list=34%, signal=28%	PSMD8/UBC/PSMD12/PSMD13/PSMB8/PSMA2
REACTOME_TELOMERE_MAINTENANCE	REACTOME_TELOMERE_MAINTENANCE	23	0.398418	0.976052	0.491743	1	1	750	tags=13%, list=12%, signal=11%	RTEL1/POLD4/RFC3
REACTOME_INTRA_GOLGI_TRAFFIC	REACTOME_INTRA_GOLGI_TRAFFIC	18	-0.40223	-0.9723	0.501094	1	1	58	tags=33%, list=1%, signal=33%	CYTH1/NAPG/NAPB/COG8/NSF/RAB41
REACTOME_POST_TRANSLATIONAL_MODIFICATION_SYNTHESIS_OF_GPI_ANCHORED_PROTEINS	REACTOME_POST_TRANSLATIONAL_MODIFICATION_SYNTHESIS_OF_GPI_ANCHORED_PROTEINS	29	0.380671	0.971584	0.509225	1	1	632	tags=14%, list=10%, signal=12%	TECTB/CD109/MDGA1/LYPD6B
REACTOME_SCF_SKP2_MEDIATED_DEGRADATION_OF_P27_P21	REACTOME_SCF_SKP2_MEDIATED_DEGRADATION_OF_P27_P21	18	-0.4019	-0.9715	0.503282	1	1	2061	tags=44%, list=34%, signal=29%	PSMD8/UBC/CKS1B/PSMD12/PSMD13/CCNE1/PSMB8/PSMA2
REACTOME_SULFUR_AMINO_ACID_METABOLISM	REACTOME_SULFUR_AMINO_ACID_METABOLISM	13	0.442605	0.969686	0.479245	1	1	1288	tags=46%, list=21%, signal=36%	GADL1/CBS/SQOR/SUOX/SLC25A10/MPST
REACTOME_RNA_POLYMERASE_III_TRANSCRIPTION_INITIATION_FROM_TYPE_1_PROMOTER	REACTOME_RNA_POLYMERASE_III_TRANSCRIPTION_INITIATION_FROM_TYPE_1_PROMOTER	10	-0.44892	-0.96787	0.473461	1	1	3323	tags=90%, list=55%, signal=40%	POLR3E/POLR3C/GTF3C4/GTF3C3/GTF3C2/POLR3A/POLR3H/POLR2F/POLR3GL
REACTOME_SYNTHESIS_OF_SUBSTRATES_IN_N_GLYCAN_BIOSYTHESIS	REACTOME_SYNTHESIS_OF_SUBSTRATES_IN_N_GLYCAN_BIOSYTHESIS	24	-0.37335	-0.96717	0.495652	1	1	237	tags=17%, list=4%, signal=16%	ST6GALNAC4/ST8SIA5/ST8SIA4/ST6GALNAC6
REACTOME_RHOA_GTPASE_CYCLE	REACTOME_RHOA_GTPASE_CYCLE	52	-0.32195	-0.96512	0.52	1	1	995	tags=21%, list=17%, signal=18%	ARHGEF4/ARHGAP20/DEF6/ARHGAP4/RHPN1/FMNL3/ACTC1/TIAM1/ARHGAP22/ARHGAP6/ARHGAP9
REACTOME_REGULATION_OF_MITF_M_DEPENDENT_GENES_INVOLVED_IN_PIGMENTATION	REACTOME_REGULATION_OF_MITF_M_DEPENDENT_GENES_INVOLVED_IN_PIGMENTATION	13	-0.42744	-0.9646	0.504237	1	1	1435	tags=38%, list=24%, signal=29%	BCL7B/USF1/SMARCD3/LEF1/MYRIP
REACTOME_SEALING_OF_THE_NUCLEAR_ENVELOPE_NE_BY_ESCRT_III	REACTOME_SEALING_OF_THE_NUCLEAR_ENVELOPE_NE_BY_ESCRT_III	17	-0.40487	-0.96368	0.530303	1	1	73	tags=12%, list=1%, signal=12%	TUBB4A/TUBAL3
REACTOME_DEPOSITION_OF_NEW_CENPA_CONTAINING_NUCLEOSOMES_AT_THE_CENTROMERE	REACTOME_DEPOSITION_OF_NEW_CENPA_CONTAINING_NUCLEOSOMES_AT_THE_CENTROMERE	14	0.434188	0.961415	0.504726	1	1	1002	tags=36%, list=17%, signal=30%	CENPP/CENPL/CENPW/CENPO/CENPQ
REACTOME_RESOLUTION_OF_SISTER_CHROMATID_COHESION	REACTOME_RESOLUTION_OF_SISTER_CHROMATID_COHESION	55	0.33404	0.960419	0.529091	1	1	784	tags=16%, list=13%, signal=14%	AURKB/DYNC1I1/CENPP/CENPE/CENPL/BIRC5/CDK1/TUBB1/CENPO
REACTOME_REGULATION_OF_TP53_ACTIVITY_THROUGH_PHOSPHORYLATION	REACTOME_REGULATION_OF_TP53_ACTIVITY_THROUGH_PHOSPHORYLATION	37	0.359057	0.959788	0.536496	1	1	41	tags=3%, list=1%, signal=3%	AURKB
REACTOME_REGULATION_OF_ENDOGENOUS_RETROELEMENTS_BY_KRAB_ZFP_PROTEINS	REACTOME_REGULATION_OF_ENDOGENOUS_RETROELEMENTS_BY_KRAB_ZFP_PROTEINS	17	-0.40298	-0.95917	0.532468	1	1	1760	tags=53%, list=29%, signal=38%	ZNF669/ZNF28/ZNF708/ZNF354A/ZNF331/ZNF816/ZNF382/ZNF425/ZNF136
REACTOME_INNATE_IMMUNE_SYSTEM	REACTOME_INNATE_IMMUNE_SYSTEM	314	-0.24686	-0.95447	0.631429	1	1	926	tags=16%, list=15%, signal=14%	PDZD11/CD4/PGM2/MUC13/COMMD3/DPP7/CD58/RAB3A/SLC27A2/CPN1/SERPING1/TIFA/POLR3GL/LYZ/UNC93B1/PTAFR/VRK3/CTSV/SLC2A3/RAC2/ATP6V1E2/CASP4/SLPI/LAT2/CTSK/BPIFB1/NFATC1/MAP3K8/PADI2/BST1/PIGR/MUC20/PSMA2/LRRC7/NME2/NOS3/C2/SELL/PRSS3/TLR6/NFAM1/ARHGAP9/ATP6V1C2/MIF/AIM2/CD3G/FGL2/ORM2/FCGR2A/FOLR3
REACTOME_RHO_GTPASES_ACTIVATE_FORMINS	REACTOME_RHO_GTPASES_ACTIVATE_FORMINS	56	0.330239	0.951874	0.537906	1	1	784	tags=16%, list=13%, signal=14%	AURKB/DYNC1I1/CENPP/CENPE/CENPL/BIRC5/SRGAP2/TUBB1/CENPO
REACTOME_INTRACELLULAR_SIGNALING_BY_SECOND_MESSENGERS	REACTOME_INTRACELLULAR_SIGNALING_BY_SECOND_MESSENGERS	99	-0.28443	-0.94961	0.57783	1	1	672	tags=14%, list=11%, signal=13%	RRAGC/NTF3/PIK3R3/EGR1/FGF2/THEM4/RAC2/CAMK4/PSMA2/PRKAR2B/FGF5/KL/FGF17/NR2E1
REACTOME_TRANSLATION_OF_SARS_COV_1_STRUCTURAL_PROTEINS	REACTOME_TRANSLATION_OF_SARS_COV_1_STRUCTURAL_PROTEINS	11	0.444585	0.948132	0.516854	1	1	1291	tags=36%, list=21%, signal=29%	ST3GAL3/ST3GAL4/PARP16/MOGS
REACTOME_LAMININ_INTERACTIONS	REACTOME_LAMININ_INTERACTIONS	14	0.427096	0.945712	0.516068	1	1	1364	tags=50%, list=23%, signal=39%	COL4A3/NID2/ITGA2/COL4A1/ITGB4/COL4A2/ITGA3
REACTOME_PLASMA_LIPOPROTEIN_REMODELING	REACTOME_PLASMA_LIPOPROTEIN_REMODELING	10	0.45086	0.944189	0.519774	1	1	1602	tags=40%, list=27%, signal=29%	APOA5/LMF1/APOA4/PCSK5
REACTOME_HEPARAN_SULFATE_HEPARIN_HS_GAG_METABOLISM	REACTOME_HEPARAN_SULFATE_HEPARIN_HS_GAG_METABOLISM	22	-0.37136	-0.94347	0.526882	1	1	1336	tags=27%, list=22%, signal=21%	GPC4/HPSE/GPC2/HS3ST5/GLB1L2/GPC5
REACTOME_SEMAPHORIN_INTERACTIONS	REACTOME_SEMAPHORIN_INTERACTIONS	16	-0.40053	-0.93944	0.549356	1	1	1000	tags=31%, list=17%, signal=26%	CDK5/CDK5R1/SEMA7A/MYH11/SEMA4A
REACTOME_CONSTITUTIVE_SIGNALING_BY_ABERRANT_PI3K_IN_CANCER	REACTOME_CONSTITUTIVE_SIGNALING_BY_ABERRANT_PI3K_IN_CANCER	26	-0.35622	-0.93917	0.528509	1	1	113	tags=27%, list=2%, signal=27%	NTF3/PIK3R3/FGF2/RAC2/FGF5/KL/FGF17
REACTOME_BETA_CATENIN_INDEPENDENT_WNT_SIGNALING	REACTOME_BETA_CATENIN_INDEPENDENT_WNT_SIGNALING	45	-0.3182	-0.93527	0.559395	1	1	2061	tags=47%, list=34%, signal=31%	PSMD8/UBC/PSMD12/PSMD13/WNT5B/SMURF2/GNG7/GNB5/RYK/FZD6/PRKG2/PPP3R1/AP2S1/ROR2/PSMB8/PDE6A/PRICKLE1/RAC2/LEF1/NFATC1/PSMA2
REACTOME_NEGATIVE_REGULATION_OF_NMDA_RECEPTOR_MEDIATED_NEURONAL_TRANSMISSION	REACTOME_NEGATIVE_REGULATION_OF_NMDA_RECEPTOR_MEDIATED_NEURONAL_TRANSMISSION	12	-0.42259	-0.93422	0.535637	1	1	510	tags=58%, list=8%, signal=53%	DLG3/GRIN2A/CAMK4/DLG2/PPM1E/LRRC7/GRIN2D
REACTOME_SARS_COV_1_ACTIVATES_MODULATES_INNATE_IMMUNE_RESPONSES	REACTOME_SARS_COV_1_ACTIVATES_MODULATES_INNATE_IMMUNE_RESPONSES	15	0.414357	0.934058	0.521657	1	1	1404	tags=33%, list=23%, signal=26%	BST2/IRAK2/PYCARD/TKFC/IKBKE
REACTOME_CELL_CYCLE_CHECKPOINTS	REACTOME_CELL_CYCLE_CHECKPOINTS	96	0.302043	0.933632	0.594737	1	1	784	tags=14%, list=13%, signal=12%	AURKB/DYNC1I1/CENPP/CENPE/MCM10/ANAPC15/CENPL/BIRC5/KAT5/CDK1/CDC25A/RFC3/CENPO
REACTOME_CARDIAC_CONDUCTION	REACTOME_CARDIAC_CONDUCTION	31	0.360868	0.930978	0.537453	1	1	460	tags=19%, list=8%, signal=18%	SCN5A/SCN1B/KCNK13/CAMK2B/CACNB2/KCNJ14
REACTOME_EPHRIN_SIGNALING	REACTOME_EPHRIN_SIGNALING	11	-0.42745	-0.92833	0.525641	1	1	993	tags=100%, list=16%, signal=84%	EPHB4/GIT1/EFNB2/SRC/PAK2/EPHB2/FYN/EPHB1/EPHB6/EFNB3
REACTOME_CLASS_I_MHC_MEDIATED_ANTIGEN_PROCESSING_PRESENTATION	REACTOME_CLASS_I_MHC_MEDIATED_ANTIGEN_PROCESSING_PRESENTATION	131	-0.26884	-0.92765	0.63	1	1	1118	tags=16%, list=19%, signal=13%	HLA-F/PSMB8/UBE2D1/PRKN/UBE2E2/HECTD2/ASB14/KLHL11/FBXO41/FBXO10/CTSV/ANAPC10/KCTD6/FBXL13/FBXL7/FBXO4/PSMA2/FBXO15/TLR6/ASB3/ASB12
REACTOME_REGULATION_OF_INSULIN_LIKE_GROWTH_FACTOR_IGF_TRANSPORT_AND_UPTAKE_BY_INSULIN_LIKE_GROWTH_FACTOR_BINDING_PROTEINS_IGFBPS	REACTOME_REGULATION_OF_INSULIN_LIKE_GROWTH_FACTOR_IGF_TRANSPORT_AND_UPTAKE_BY_INSULIN_LIKE_GROWTH_FACTOR_BINDING_PROTEINS_IGFBPS	39	0.344169	0.926457	0.596715	1	1	875	tags=18%, list=15%, signal=15%	IGFBP1/APOA5/FBN1/MMP2/PAPPA2/SERPIND1/AHSG
REACTOME_OTHER_INTERLEUKIN_SIGNALING	REACTOME_OTHER_INTERLEUKIN_SIGNALING	10	-0.42941	-0.92581	0.522293	1	1	1496	tags=50%, list=25%, signal=38%	STX1A/JAK1/CASP3/CD4/IL16
REACTOME_DEFECTIVE_CFTR_CAUSES_CYSTIC_FIBROSIS	REACTOME_DEFECTIVE_CFTR_CAUSES_CYSTIC_FIBROSIS	15	-0.39961	-0.92366	0.558386	1	1	2061	tags=47%, list=34%, signal=31%	DERL1/PSMD8/UBC/PSMD12/PSMD13/PSMB8/PSMA2
REACTOME_SYNTHESIS_OF_PC	REACTOME_SYNTHESIS_OF_PC	13	-0.40892	-0.92282	0.538136	1	1	1755	tags=46%, list=29%, signal=33%	PEMT/PCTP/CEPT1/SLC44A5/MFSD2A/PCYT1B
REACTOME_BASE_EXCISION_REPAIR	REACTOME_BASE_EXCISION_REPAIR	24	0.375141	0.920642	0.562731	1	1	750	tags=17%, list=12%, signal=15%	NEIL1/NTHL1/POLD4/RFC3
REACTOME_ADIPOGENESIS	REACTOME_ADIPOGENESIS	26	0.367249	0.918976	0.547619	1	1	49	tags=4%, list=1%, signal=4%	PLIN1
REACTOME_G1_S_DNA_DAMAGE_CHECKPOINTS	REACTOME_G1_S_DNA_DAMAGE_CHECKPOINTS	21	-0.36195	-0.91638	0.564756	1	1	2061	tags=48%, list=34%, signal=31%	PSMD8/UBC/PSMD12/PSMD13/PCBP4/MDM2/CCNE1/PSMB8/ZNF385A/PSMA2
REACTOME_CROSS_PRESENTATION_OF_SOLUBLE_EXOGENOUS_ANTIGENS_ENDOSOMES	REACTOME_CROSS_PRESENTATION_OF_SOLUBLE_EXOGENOUS_ANTIGENS_ENDOSOMES	14	0.4134	0.915383	0.557656	1	1	428	tags=14%, list=7%, signal=13%	MRC1/MRC2
REACTOME_RHO_GTPASE_EFFECTORS	REACTOME_RHO_GTPASE_EFFECTORS	94	0.296484	0.914472	0.625659	1	1	784	tags=14%, list=13%, signal=12%	AURKB/WAS/DYNC1I1/CENPP/CENPE/CIT/CENPL/BIRC5/NCF2/DLG4/SRGAP2/TUBB1/CENPO
REACTOME_IRE1ALPHA_ACTIVATES_CHAPERONES	REACTOME_IRE1ALPHA_ACTIVATES_CHAPERONES	18	0.386871	0.912094	0.557798	1	1	3698	tags=100%, list=61%, signal=39%	TATDN2/PPP2R5B/DDX11/GOSR2/ACADVL/LMNA/ARFGAP1/HYOU1/DNAJB11/WIPI1/EXTL3/SRPRB/KLHDC3/KDELR3/DCTN1/TSPYL2/CXXC1/GSK3A
REACTOME_VOLTAGE_GATED_POTASSIUM_CHANNELS	REACTOME_VOLTAGE_GATED_POTASSIUM_CHANNELS	13	0.415812	0.910987	0.560377	1	1	739	tags=46%, list=12%, signal=41%	KCNV2/KCNAB1/KCNG3/KCNG1/KCNB1/KCNC4
REACTOME_RAF_INDEPENDENT_MAPK1_3_ACTIVATION	REACTOME_RAF_INDEPENDENT_MAPK1_3_ACTIVATION	10	0.434979	0.910931	0.559322	1	1	1142	tags=30%, list=19%, signal=24%	DUSP2/CDK1/JAK2
REACTOME_MET_PROMOTES_CELL_MOTILITY	REACTOME_MET_PROMOTES_CELL_MOTILITY	16	0.39899	0.910206	0.550373	1	1	2099	tags=69%, list=35%, signal=45%	TNS4/COL24A1/ITGA2/COL5A2/TNS3/ITGA3/LAMB3/MET/LAMB1/RAPGEF1/LAMB2
REACTOME_RET_SIGNALING	REACTOME_RET_SIGNALING	15	-0.39294	-0.90826	0.575372	1	1	67	tags=27%, list=1%, signal=26%	RAP1GAP/PIK3CD/PIK3R3/DOK5
REACTOME_GLYCOSPHINGOLIPID_METABOLISM	REACTOME_GLYCOSPHINGOLIPID_METABOLISM	27	-0.34038	-0.90735	0.578603	1	1	846	tags=15%, list=14%, signal=13%	FUT1/ST8SIA5/GLB1L2/ST6GALNAC6
REACTOME_INITIATION_OF_NUCLEAR_ENVELOPE_NE_REFORMATION	REACTOME_INITIATION_OF_NUCLEAR_ENVELOPE_NE_REFORMATION	10	0.432923	0.906626	0.564972	1	1	2110	tags=60%, list=35%, signal=39%	CDK1/VRK1/SIRT2/EMD/LMNA/CCNB1
REACTOME_METABOLISM_OF_AMINO_ACIDS_AND_DERIVATIVES	REACTOME_METABOLISM_OF_AMINO_ACIDS_AND_DERIVATIVES	112	0.283845	0.906496	0.647555	1	1	92	tags=4%, list=2%, signal=4%	BCKDHA/PRODH/GLS2/CARNS1
REACTOME_G_PROTEIN_MEDIATED_EVENTS	REACTOME_G_PROTEIN_MEDIATED_EVENTS	19	0.383716	0.905764	0.570356	1	1	175	tags=11%, list=3%, signal=10%	GNA14/CAMK2B
REACTOME_SRP_DEPENDENT_COTRANSLATIONAL_PROTEIN_TARGETING_TO_MEMBRANE	REACTOME_SRP_DEPENDENT_COTRANSLATIONAL_PROTEIN_TARGETING_TO_MEMBRANE	19	-0.36563	-0.90523	0.584222	1	1	2450	tags=53%, list=41%, signal=31%	SRP68/RPN2/RPL22L1/RPN1/SPCS1/RPS23/RPL14/SRP19/RPL39L/RPL26L1
REACTOME_CREB1_PHOSPHORYLATION_THROUGH_NMDA_RECEPTOR_MEDIATED_ACTIVATION_OF_RAS_SIGNALING	REACTOME_CREB1_PHOSPHORYLATION_THROUGH_NMDA_RECEPTOR_MEDIATED_ACTIVATION_OF_RAS_SIGNALING	11	-0.41514	-0.90161	0.561966	1	1	508	tags=27%, list=8%, signal=25%	DLG2/LRRC7/GRIN2D
REACTOME_SMOOTH_MUSCLE_CONTRACTION	REACTOME_SMOOTH_MUSCLE_CONTRACTION	11	-0.41372	-0.89853	0.564103	1	1	342	tags=18%, list=6%, signal=17%	MYH11/GUCY1B1
REACTOME_DNA_STRAND_ELONGATION	REACTOME_DNA_STRAND_ELONGATION	18	0.379651	0.895072	0.576147	1	1	1730	tags=44%, list=29%, signal=32%	POLD4/RFC3/GINS2/GINS4/DNA2/MCM6/PRIM1/MCM5
REACTOME_FOXO_MEDIATED_TRANSCRIPTION	REACTOME_FOXO_MEDIATED_TRANSCRIPTION	22	0.371163	0.894495	0.573557	1	1	799	tags=14%, list=13%, signal=12%	IGFBP1/GCK/INS
REACTOME_REPRODUCTION	REACTOME_REPRODUCTION	27	0.356491	0.894307	0.595588	1	1	890	tags=33%, list=15%, signal=29%	SYCP2/TFAP2C/HSPA2/PSMC3IP/MSH5/CATSPERG/HVCN1/TEX15/STAG3
REACTOME_SEPARATION_OF_SISTER_CHROMATIDS	REACTOME_SEPARATION_OF_SISTER_CHROMATIDS	71	0.299009	0.894047	0.623037	1	1	784	tags=14%, list=13%, signal=12%	AURKB/DYNC1I1/CENPP/CENPE/ANAPC15/CENPL/BIRC5/PTTG1/TUBB1/CENPO
REACTOME_MITOTIC_PROMETAPHASE	REACTOME_MITOTIC_PROMETAPHASE	81	0.295094	0.893571	0.645105	1	1	784	tags=15%, list=13%, signal=13%	AURKB/DYNC1I1/CENPP/CENPE/NCAPG/CNTRL/CENPL/BIRC5/CDK1/TUBB1/CEP192/CENPO
REACTOME_HOST_INTERACTIONS_OF_HIV_FACTORS	REACTOME_HOST_INTERACTIONS_OF_HIV_FACTORS	38	-0.31596	-0.89355	0.604857	1	1	2061	tags=37%, list=34%, signal=24%	PSMD8/UBC/PSMD12/PSMD13/NUP93/NUP133/AP2S1/ATP6V1H/NUP54/AP1S2/PSMB8/CD4/APOBEC3G/PSMA2
REACTOME_KIDNEY_DEVELOPMENT	REACTOME_KIDNEY_DEVELOPMENT	11	-0.41077	-0.89211	0.568376	1	1	672	tags=45%, list=11%, signal=40%	SLIT2/FGF2/IRX2/GATA3/ITGA8
REACTOME_INOSITOL_PHOSPHATE_METABOLISM	REACTOME_INOSITOL_PHOSPHATE_METABOLISM	17	-0.37464	-0.89173	0.601732	1	1	1406	tags=47%, list=23%, signal=36%	INPP5A/INPP5B/PLCB4/SYNJ1/INPP5J/MTMR7/NUDT11/NUDT10
REACTOME_FANCONI_ANEMIA_PATHWAY	REACTOME_FANCONI_ANEMIA_PATHWAY	18	0.378125	0.891473	0.577982	1	1	1506	tags=50%, list=25%, signal=38%	FANCD2/EME1/FANCI/FANCE/ERCC1/FANCA/DCLRE1B/FANCF/EME2
REACTOME_EPH_EPHRIN_SIGNALING	REACTOME_EPH_EPHRIN_SIGNALING	39	-0.31223	-0.88787	0.623348	1	1	1416	tags=28%, list=24%, signal=22%	AP2S1/CDC42/EFNA3/EPHB1/EPHB6/EFNB3/EFNA5/EPHA5/TIAM1/EPHA6/MYH11
REACTOME_PI3K_AKT_SIGNALING_IN_CANCER	REACTOME_PI3K_AKT_SIGNALING_IN_CANCER	36	-0.31409	-0.88622	0.605544	1	1	113	tags=19%, list=2%, signal=19%	NTF3/PIK3R3/FGF2/RAC2/FGF5/KL/FGF17
REACTOME_COPI_INDEPENDENT_GOLGI_TO_ER_RETROGRADE_TRAFFIC	REACTOME_COPI_INDEPENDENT_GOLGI_TO_ER_RETROGRADE_TRAFFIC	18	-0.36644	-0.88577	0.610503	1	1	460	tags=17%, list=8%, signal=15%	TUBB4A/PLA2G4A/TUBAL3
REACTOME_BIOSYNTHESIS_OF_THE_N_GLYCAN_PRECURSOR_DOLICHOL_LIPID_LINKED_OLIGOSACCHARIDE_LLO_AND_TRANSFER_TO_A_NASCENT_PROTEIN	REACTOME_BIOSYNTHESIS_OF_THE_N_GLYCAN_PRECURSOR_DOLICHOL_LIPID_LINKED_OLIGOSACCHARIDE_LLO_AND_TRANSFER_TO_A_NASCENT_PROTEIN	30	-0.32258	-0.88269	0.632479	1	1	1380	tags=30%, list=23%, signal=23%	RENBP/ALG8/ALG5/ALG3/ST6GALNAC4/ST8SIA5/ALG10/ST8SIA4/ST6GALNAC6
REACTOME_MUSCLE_CONTRACTION	REACTOME_MUSCLE_CONTRACTION	50	-0.29684	-0.88024	0.673378	1	1	579	tags=24%, list=10%, signal=22%	KCNK17/ACTC1/SLC8A2/KCNE3/RANGRF/MYH11/SLN/RYR2/GUCY1B1/MYH3/CORIN/TNNT2
REACTOME_FATTY_ACID_METABOLISM	REACTOME_FATTY_ACID_METABOLISM	70	0.295338	0.879151	0.664912	1	1	383	tags=7%, list=6%, signal=7%	ACAD11/LTC4S/ALOX15B/ALOXE3/CYP2J2
REACTOME_ACTIVATION_OF_THE_PRE_REPLICATIVE_COMPLEX	REACTOME_ACTIVATION_OF_THE_PRE_REPLICATIVE_COMPLEX	13	0.398392	0.872824	0.598113	1	1	1730	tags=46%, list=29%, signal=33%	MCM10/CDC6/MCM6/POLE2/PRIM1/MCM5
REACTOME_AEROBIC_RESPIRATION_AND_RESPIRATORY_ELECTRON_TRANSPORT	REACTOME_AEROBIC_RESPIRATION_AND_RESPIRATORY_ELECTRON_TRANSPORT	62	-0.28293	-0.87213	0.687783	1	1	1183	tags=21%, list=20%, signal=17%	GLO1/COA3/SIRT3/NDUFA9/NDUFAF4/TMEM177/PDK2/PDK4/NDUFB8/NDUFA7/ADHFE1/UCP3/COX16
REACTOME_ION_HOMEOSTASIS	REACTOME_ION_HOMEOSTASIS	10	-0.40441	-0.87192	0.58811	1	1	543	tags=40%, list=9%, signal=36%	FKBP1B/SLC8A2/SLN/RYR2
REACTOME_TRANSCRIPTIONAL_REGULATION_BY_RUNX3	REACTOME_TRANSCRIPTIONAL_REGULATION_BY_RUNX3	29	-0.3209	-0.86937	0.636957	1	1	2061	tags=41%, list=34%, signal=27%	PSMD8/UBC/PSMD12/PSMD13/SMURF2/MDM2/BRD2/PSMB8/NOTCH1/LEF1/PSMA2/SPP1
REACTOME_DECTIN_1_MEDIATED_NONCANONICAL_NF_KB_SIGNALING	REACTOME_DECTIN_1_MEDIATED_NONCANONICAL_NF_KB_SIGNALING	17	-0.36477	-0.86824	0.621212	1	1	2258	tags=71%, list=38%, signal=44%	PSMD2/CHUK/PSMD3/PSMD6/CUL1/FBXW11/PSMD8/UBC/PSMD12/PSMD13/PSMB8/PSMA2
REACTOME_RECYCLING_PATHWAY_OF_L1	REACTOME_RECYCLING_PATHWAY_OF_L1	19	-0.35034	-0.8674	0.628998	1	1	73	tags=11%, list=1%, signal=10%	TUBB4A/TUBAL3
REACTOME_ION_TRANSPORT_BY_P_TYPE_ATPASES	REACTOME_ION_TRANSPORT_BY_P_TYPE_ATPASES	13	-0.38381	-0.86613	0.601695	1	1	926	tags=31%, list=15%, signal=26%	PDZD11/ATP10A/ATP8A2/SLN
REACTOME_COLLAGEN_DEGRADATION	REACTOME_COLLAGEN_DEGRADATION	18	-0.35795	-0.86526	0.628009	1	1	459	tags=22%, list=8%, signal=21%	MMP13/CTSK/COL8A1/COL9A3
REACTOME_GENE_AND_PROTEIN_EXPRESSION_BY_JAK_STAT_SIGNALING_AFTER_INTERLEUKIN_12_STIMULATION	REACTOME_GENE_AND_PROTEIN_EXPRESSION_BY_JAK_STAT_SIGNALING_AFTER_INTERLEUKIN_12_STIMULATION	10	-0.40081	-0.86416	0.596603	1	1	137	tags=20%, list=2%, signal=20%	CDC42/MIF
REACTOME_COMPLEX_IV_ASSEMBLY	REACTOME_COMPLEX_IV_ASSEMBLY	10	-0.40046	-0.8634	0.600849	1	1	1483	tags=80%, list=25%, signal=60%	TMEM223/COQ10B/COX18/COA1/COX15/COA3/TMEM177/COX16
REACTOME_MAPK_FAMILY_SIGNALING_CASCADES	REACTOME_MAPK_FAMILY_SIGNALING_CASCADES	105	-0.25674	-0.86231	0.76259	1	1	297	tags=10%, list=5%, signal=9%	CNKSR2/DLG2/PSMA2/LRRC7/ANGPT1/IL3RA/GRIN2D/FGF5/KL/FGF17
REACTOME_INSULIN_PROCESSING	REACTOME_INSULIN_PROCESSING	12	-0.38974	-0.8616	0.606911	1	1	437	tags=33%, list=7%, signal=31%	EXOC1/KIF5C/MYRIP/PCSK2
REACTOME_TRANSCRIPTIONAL_REGULATION_BY_RUNX1	REACTOME_TRANSCRIPTIONAL_REGULATION_BY_RUNX1	48	-0.29151	-0.85837	0.717149	1	1	1077	tags=21%, list=18%, signal=17%	PSMB8/SMARCD3/SOCS4/YAF2/CTSV/KCTD6/CTSK/GATA3/PSMA2/NFE2
REACTOME_INTERLEUKIN_12_FAMILY_SIGNALING	REACTOME_INTERLEUKIN_12_FAMILY_SIGNALING	16	0.375713	0.857105	0.610075	1	1	260	tags=12%, list=4%, signal=12%	IL12A/BOLA2
REACTOME_INTERLEUKIN_6_FAMILY_SIGNALING	REACTOME_INTERLEUKIN_6_FAMILY_SIGNALING	10	-0.39727	-0.85652	0.613588	1	1	337	tags=30%, list=6%, signal=28%	JAK1/IL11/CRLF1
REACTOME_APOPTOTIC_EXECUTION_PHASE	REACTOME_APOPTOTIC_EXECUTION_PHASE	15	-0.37019	-0.85568	0.630573	1	1	1386	tags=20%, list=23%, signal=15%	CASP3/DFFB/GAS2
REACTOME_TERMINATION_OF_TRANSLESION_DNA_SYNTHESIS	REACTOME_TERMINATION_OF_TRANSLESION_DNA_SYNTHESIS	14	0.385874	0.854433	0.621928	1	1	972	tags=29%, list=16%, signal=24%	POLD4/RFC3/USP43/POLI
REACTOME_PLATELET_ACTIVATION_SIGNALING_AND_AGGREGATION	REACTOME_PLATELET_ACTIVATION_SIGNALING_AND_AGGREGATION	79	-0.26666	-0.85135	0.751163	1	1	460	tags=9%, list=8%, signal=8%	PLA2G4A/SYTL4/SERPINA4/F8/RAPGEF3/VEGFC/ORM2
REACTOME_RNA_POLYMERASE_III_TRANSCRIPTION	REACTOME_RNA_POLYMERASE_III_TRANSCRIPTION	17	0.36785	0.85124	0.62037	1	1	959	tags=24%, list=16%, signal=20%	NFIA/NFIX/BRF2/POU2F1
REACTOME_TRANSPORT_OF_SMALL_MOLECULES	REACTOME_TRANSPORT_OF_SMALL_MOLECULES	236	-0.22798	-0.85083	0.906077	1	1	926	tags=17%, list=15%, signal=15%	PDZD11/SLC2A6/SLC34A2/SLC13A2/ABCB1/SLC18A1/MCOLN3/SLC45A3/SLC6A15/TTYH2/SLC4A4/SLC6A3/SLC39A8/SLC14A2/ATP10A/TRPV3/SLC2A3/ATP6V1E2/ANO4/ABCB4/SLC8A2/SLC24A3/AQP11/SLC27A6/ATP8A2/SLC7A10/CLCNKB/ASIC2/SLN/TRPV4/PSMA2/RYR2/PRKAR2B/RHBG/ATP6V1C2/ABCC11/SLC15A3/SLC18A2/BEST4/ABCA8
REACTOME_ASPIRIN_ADME	REACTOME_ASPIRIN_ADME	13	-0.37579	-0.84805	0.625	1	1	395	tags=38%, list=7%, signal=36%	UGT2B28/UGT2B11/UGT2A3/UGT2B4/CYP2D6
REACTOME_RESPIRATORY_SYNCYTIAL_VIRUS_RSV_ATTACHMENT_AND_ENTRY	REACTOME_RESPIRATORY_SYNCYTIAL_VIRUS_RSV_ATTACHMENT_AND_ENTRY	11	-0.39005	-0.84712	0.632479	1	1	168	tags=27%, list=3%, signal=27%	GPC4/GPC2/GPC5
REACTOME_RAF_ACTIVATION	REACTOME_RAF_ACTIVATION	16	0.37133	0.847105	0.630597	1	1	175	tags=6%, list=3%, signal=6%	CAMK2B
REACTOME_E2F_MEDIATED_REGULATION_OF_DNA_REPLICATION	REACTOME_E2F_MEDIATED_REGULATION_OF_DNA_REPLICATION	11	0.396478	0.845538	0.632959	1	1	2110	tags=45%, list=35%, signal=30%	E2F1/CDK1/PRIM1/TFDP1/CCNB1
REACTOME_NEGATIVE_REGULATION_OF_NOTCH4_SIGNALING	REACTOME_NEGATIVE_REGULATION_OF_NOTCH4_SIGNALING	16	-0.36027	-0.84502	0.658798	1	1	2061	tags=38%, list=34%, signal=25%	PSMD8/UBC/PSMD12/PSMD13/PSMB8/PSMA2
REACTOME_CDC42_GTPASE_CYCLE	REACTOME_CDC42_GTPASE_CYCLE	55	-0.2772	-0.84421	0.725664	1	1	995	tags=18%, list=17%, signal=15%	ARHGEF4/ARHGAP20/DEF6/ARHGAP4/FMNL3/PLEKHG4B/TIAM1/ARHGAP22/ARHGEF6/ARHGAP9
REACTOME_MEIOSIS	REACTOME_MEIOSIS	23	0.344283	0.84343	0.636697	1	1	890	tags=26%, list=15%, signal=22%	SYCP2/HSPA2/PSMC3IP/MSH5/TEX15/STAG3
REACTOME_SARS_COV_1_INFECTION	REACTOME_SARS_COV_1_INFECTION	39	0.31309	0.842797	0.695255	1	1	1404	tags=28%, list=23%, signal=22%	ST3GAL3/BST2/ST3GAL4/IRAK2/PYCARD/PARP16/TKFC/SERPINE1/CHMP6/MOGS/IKBKE
REACTOME_TRANSLESION_SYNTHESIS_BY_Y_FAMILY_DNA_POLYMERASES_BYPASSES_LESIONS_ON_DNA_TEMPLATE	REACTOME_TRANSLESION_SYNTHESIS_BY_Y_FAMILY_DNA_POLYMERASES_BYPASSES_LESIONS_ON_DNA_TEMPLATE	15	0.373305	0.841518	0.638418	1	1	972	tags=27%, list=16%, signal=22%	POLD4/RFC3/USP43/POLI
REACTOME_NEGATIVE_REGULATION_OF_THE_PI3K_AKT_NETWORK	REACTOME_NEGATIVE_REGULATION_OF_THE_PI3K_AKT_NETWORK	42	-0.28758	-0.8386	0.701754	1	1	113	tags=19%, list=2%, signal=19%	NTF3/PIK3R3/FGF2/THEM4/RAC2/FGF5/KL/FGF17
REACTOME_GPVI_MEDIATED_ACTIVATION_CASCADE	REACTOME_GPVI_MEDIATED_ACTIVATION_CASCADE	10	-0.38827	-0.83713	0.643312	1	1	1283	tags=40%, list=21%, signal=32%	CDC42/PIK3R5/PIK3R3/RAC2
REACTOME_SIGNALING_BY_INTERLEUKINS	REACTOME_SIGNALING_BY_INTERLEUKINS	136	-0.24142	-0.83679	0.85258	1	1	361	tags=12%, list=6%, signal=11%	PTAFR/VRK3/FGF2/IL16/ZEB1/MAP3K8/IL1A/IL11/GATA3/PSMA2/HAVCR2/CRLF1/CCL20/MIF/IL3RA/VCAM1
REACTOME_NCAM_SIGNALING_FOR_NEURITE_OUT_GROWTH	REACTOME_NCAM_SIGNALING_FOR_NEURITE_OUT_GROWTH	25	0.337172	0.836784	0.666667	1	1	1173	tags=36%, list=19%, signal=29%	CACNA1I/COL4A3/ARTN/CACNB2/RPS6KA5/COL5A2/COL4A1/ST8SIA2/PSPN
REACTOME_INTERFERON_GAMMA_SIGNALING	REACTOME_INTERFERON_GAMMA_SIGNALING	36	0.31672	0.835571	0.701689	1	1	453	tags=17%, list=8%, signal=16%	CAMK2B/CIITA/MT2A/HLA-DRB5/HLA-DQB1/IRF8
REACTOME_COLLAGEN_CHAIN_TRIMERIZATION	REACTOME_COLLAGEN_CHAIN_TRIMERIZATION	14	-0.36621	-0.83391	0.668076	1	1	210	tags=21%, list=3%, signal=21%	COL22A1/COL8A1/COL9A3
REACTOME_CELL_CYCLE	REACTOME_CELL_CYCLE	243	0.237789	0.832385	0.887122	1	1	1019	tags=15%, list=17%, signal=13%	AURKB/SYCP2/RTEL1/DYNC1I1/CENPP/CENPE/MCM10/NCAPG/ANAPC15/CDK11A/HSPA2/CNTRL/CENPL/PSMC3IP/BIRC5/KAT5/MSH5/E2F1/CDK1/CDC25A/CENPW/POLD4/PTTG1/TUBB1/RFC3/CEP192/TEX15/CENPO/GINS2/STAG3/CDC6/GINS4/LIN54/KIF20A/CEP290/CENPQ/VRK1
REACTOME_HIV_INFECTION	REACTOME_HIV_INFECTION	79	0.27582	0.831848	0.758741	1	1	25	tags=1%, list=0%, signal=1%	GTF2H4
REACTOME_MOLECULES_ASSOCIATED_WITH_ELASTIC_FIBRES	REACTOME_MOLECULES_ASSOCIATED_WITH_ELASTIC_FIBRES	13	-0.36859	-0.8318	0.646186	1	1	1027	tags=38%, list=17%, signal=32%	TGFB3/FBLN5/EFEMP2/MFAP2/ITGA8
REACTOME_RSV_HOST_INTERACTIONS	REACTOME_RSV_HOST_INTERACTIONS	30	-0.30308	-0.82934	0.698718	1	1	1512	tags=37%, list=25%, signal=28%	MED27/JAK1/MED9/UBE2L6/GPC4/MED19/IFIH1/GPC2/MED26/TLR6/GPC5
REACTOME_AGGREPHAGY	REACTOME_AGGREPHAGY	19	-0.33344	-0.82556	0.686567	1	1	73	tags=16%, list=1%, signal=16%	PRKN/TUBB4A/TUBAL3
REACTOME_NCAM1_INTERACTIONS	REACTOME_NCAM1_INTERACTIONS	18	0.349993	0.82515	0.658716	1	1	1339	tags=50%, list=22%, signal=39%	CACNA1I/COL4A3/ARTN/CACNB2/COL5A2/COL4A1/ST8SIA2/PSPN/COL4A2
REACTOME_CYTOCHROME_P450_ARRANGED_BY_SUBSTRATE_TYPE	REACTOME_CYTOCHROME_P450_ARRANGED_BY_SUBSTRATE_TYPE	16	0.361279	0.824177	0.660448	1	1	1297	tags=44%, list=22%, signal=34%	CYP2A6/CYP2J2/CYP26B1/CYP2R1/CYP27B1/CYP2C8/CYP27A1
REACTOME_HOMOLOGY_DIRECTED_REPAIR	REACTOME_HOMOLOGY_DIRECTED_REPAIR	45	0.298525	0.823209	0.753247	1	1	1778	tags=38%, list=30%, signal=27%	RTEL1/XRCC3/EME1/KAT5/POLD4/RFC3/GEN1/ERCC1/EXO1/DNA2/XRCC1/EME2/SPIDR/POLE2/TP53BP1/LIG3/TOP3A
REACTOME_G_ALPHA_12_13_SIGNALLING_EVENTS	REACTOME_G_ALPHA_12_13_SIGNALLING_EVENTS	18	-0.34024	-0.82244	0.673961	1	1	995	tags=44%, list=17%, signal=37%	ARHGEF17/ABR/RASGRF2/GNG7/GNB5/ARHGEF4/TIAM1/ARHGEF6
REACTOME_MITF_M_DEPENDENT_GENE_EXPRESSION	REACTOME_MITF_M_DEPENDENT_GENE_EXPRESSION	28	-0.30441	-0.82152	0.706783	1	1	1894	tags=39%, list=31%, signal=27%	ASAH1/ATP6V0A1/PPARGC1A/ATP6V0E1/BCL7B/ATP6V1H/USF1/SMARCD3/LEF1/MYRIP/GMPR
REACTOME_TRNA_MODIFICATION_IN_THE_NUCLEUS_AND_CYTOSOL	REACTOME_TRNA_MODIFICATION_IN_THE_NUCLEUS_AND_CYTOSOL	18	0.34776	0.819885	0.662385	1	1	2097	tags=61%, list=35%, signal=40%	ADAT3/WDR4/PUS1/DUS2/NSUN6/FTSJ1/OSGEP/TYW1/CDKAL1/ADAT1/PUS7
REACTOME_RESPIRATORY_ELECTRON_TRANSPORT	REACTOME_RESPIRATORY_ELECTRON_TRANSPORT	36	-0.29002	-0.8183	0.742004	1	1	2238	tags=50%, list=37%, signal=32%	NDUFS4/HCCS/COX18/ISCU/TIMMDC1/COA1/GOT2/TMEM126B/COX15/BCS1L/NDUFS7/COA3/NDUFA9/NDUFAF4/TMEM177/NDUFB8/NDUFA7/COX16
REACTOME_RECRUITMENT_OF_NUMA_TO_MITOTIC_CENTROSOMES	REACTOME_RECRUITMENT_OF_NUMA_TO_MITOTIC_CENTROSOMES	34	-0.29207	-0.81825	0.746204	1	1	512	tags=9%, list=9%, signal=8%	CEP152/PRKAR2B/TUBAL3
REACTOME_CYTOKINE_SIGNALING_IN_IMMUNE_SYSTEM	REACTOME_CYTOKINE_SIGNALING_IN_IMMUNE_SYSTEM	237	0.233164	0.815946	0.908948	1	1	999	tags=18%, list=17%, signal=15%	KPNA7/IL12A/CAMK2B/IL20RB/CIITA/BOLA2/ITGB2/MT2A/LTB/IL15/HLA-DRB5/HLA-DQB1/IFNAR2/HSPA2/RAG1/MMP2/IRF8/HERC5/BST2/CXCL10/TNFSF13/BIRC5/F13A1/ALPK1/CTF1/CDK1/IRAK2/RPS6KA5/TUBB1/FANCE/OSMR/ALOX15/EDAR/CNTF/GRAP2/IFI27/HLA-DRB1/IL1RAP/POU2F1/PTPN5/IFITM2/TRIM6
REACTOME_CIRCADIAN_CLOCK	REACTOME_CIRCADIAN_CLOCK	15	-0.35248	-0.81472	0.690021	1	1	2027	tags=67%, list=34%, signal=44%	UBC/PPP1CC/PPARGC1A/RORA/CREM/RBM4/MEF2C/CRTC1/SMARCD3/NR1D1
REACTOME_CA_DEPENDENT_EVENTS	REACTOME_CA_DEPENDENT_EVENTS	13	-0.36081	-0.81424	0.673729	1	1	510	tags=23%, list=8%, signal=21%	CAMK4/PLA2G4A/PRKAR2B
REACTOME_TRNA_AMINOACYLATION	REACTOME_TRNA_AMINOACYLATION	10	0.388808	0.81424	0.681733	1	1	185	tags=10%, list=3%, signal=10%	SARS2
REACTOME_INFLUENZA_INFECTION	REACTOME_INFLUENZA_INFECTION	25	0.327716	0.813316	0.703704	1	1	119	tags=4%, list=2%, signal=4%	KPNA7
REACTOME_OPIOID_SIGNALLING	REACTOME_OPIOID_SIGNALLING	29	0.318154	0.812022	0.710332	1	1	175	tags=7%, list=3%, signal=7%	GNA14/CAMK2B
REACTOME_MTOR_SIGNALLING	REACTOME_MTOR_SIGNALLING	14	-0.35658	-0.812	0.693446	1	1	1246	tags=21%, list=21%, signal=17%	PRKAA2/RRAGC/STRADA
REACTOME_APOPTOTIC_CLEAVAGE_OF_CELLULAR_PROTEINS	REACTOME_APOPTOTIC_CLEAVAGE_OF_CELLULAR_PROTEINS	11	-0.37359	-0.81137	0.681624	1	1	410	tags=82%, list=7%, signal=76%	FNTA/LMNB1/DBNL/GSN/CASP6/ACIN1/CTNNB1/CASP3/GAS2
REACTOME_GABA_B_RECEPTOR_ACTIVATION	REACTOME_GABA_B_RECEPTOR_ACTIVATION	13	0.369612	0.809769	0.656604	1	1	1432	tags=31%, list=24%, signal=24%	KCNJ5/ADCY9/KCNJ16/ADCY2
REACTOME_REGULATION_OF_RUNX2_EXPRESSION_AND_ACTIVITY	REACTOME_REGULATION_OF_RUNX2_EXPRESSION_AND_ACTIVITY	21	0.340863	0.80952	0.696798	1	1	106	tags=5%, list=2%, signal=5%	DLX6
REACTOME_SIGNALING_BY_VEGF	REACTOME_SIGNALING_BY_VEGF	34	-0.28888	-0.80931	0.754881	1	1	629	tags=9%, list=10%, signal=8%	THEM4/NOS3/VEGFC
REACTOME_TCF_DEPENDENT_SIGNALING_IN_RESPONSE_TO_WNT	REACTOME_TCF_DEPENDENT_SIGNALING_IN_RESPONSE_TO_WNT	47	0.287811	0.804547	0.770642	1	1	567	tags=6%, list=9%, signal=6%	RSPO3/FZD2/KAT5
REACTOME_SIGNALING_BY_MODERATE_KINASE_ACTIVITY_BRAF_MUTANTS	REACTOME_SIGNALING_BY_MODERATE_KINASE_ACTIVITY_BRAF_MUTANTS	14	0.36308	0.803961	0.672968	1	1	175	tags=7%, list=3%, signal=7%	CAMK2B
REACTOME_INTERFERON_SIGNALING	REACTOME_INTERFERON_SIGNALING	96	0.25976	0.802933	0.826316	1	1	1142	tags=22%, list=19%, signal=18%	KPNA7/CAMK2B/CIITA/MT2A/HLA-DRB5/HLA-DQB1/IFNAR2/HSPA2/IRF8/HERC5/BST2/CDK1/TUBB1/FANCE/IFI27/HLA-DRB1/IFITM2/TRIM6/STAT2/FANCA/JAK2
REACTOME_INTERLEUKIN_4_AND_INTERLEUKIN_13_SIGNALING	REACTOME_INTERLEUKIN_4_AND_INTERLEUKIN_13_SIGNALING	25	-0.30622	-0.80218	0.738095	1	1	672	tags=20%, list=11%, signal=18%	FGF2/ZEB1/IL1A/GATA3/VCAM1
REACTOME_HSF1_ACTIVATION	REACTOME_HSF1_ACTIVATION	14	0.361919	0.80139	0.674858	1	1	263	tags=7%, list=4%, signal=7%	HSPA6
REACTOME_PHOSPHOLIPID_METABOLISM	REACTOME_PHOSPHOLIPID_METABOLISM	73	-0.25321	-0.79874	0.808411	1	1	1286	tags=27%, list=21%, signal=22%	PIP4P1/PLBD1/SLC44A5/RAB4A/GDPD1/PI4KB/PIK3CD/CPNE1/AGK/PLA2G10/SYNJ1/PGS1/PIK3R5/PIK3R3/MFSD2A/INPP5J/PCYT1B/MTMR7/PLA2G4A/PLEKHA2
REACTOME_ESR_MEDIATED_SIGNALING	REACTOME_ESR_MEDIATED_SIGNALING	44	-0.27279	-0.79833	0.779221	1	1	495	tags=9%, list=8%, signal=8%	KCTD6/GATA3/NOS3/FOSB
REACTOME_RNA_POLYMERASE_II_TRANSCRIPTION	REACTOME_RNA_POLYMERASE_II_TRANSCRIPTION	434	0.215199	0.795377	0.980085	1	1	704	tags=9%, list=12%, signal=9%	NR1I2/GTF2H4/RXRG/AURKB/RSPO3/IGFBP1/GLS2/DLX6/RARB/CAMK2B/ZNF221/POU4F1/TFAP2C/ZNF660/ZNF563/ZNF333/ANAPC15/ZNF324B/FANCD2/NR1I3/ZNF233/HEY2/THOC3/GCK/BIRC5/ZNF562/TEAD4/NR4A3/KAT5/ZKSCAN3/GPS2/E2F1/CDK1/ZNF624/ZNF700/ZNF300/ZNF154/ZFP69B/FANCI
REACTOME_BACTERIAL_INFECTION_PATHWAYS	REACTOME_BACTERIAL_INFECTION_PATHWAYS	25	-0.30338	-0.79474	0.748918	1	1	50	tags=12%, list=1%, signal=12%	SV2A/VAMP1/SH3GL3
REACTOME_REGULATION_OF_TP53_ACTIVITY	REACTOME_REGULATION_OF_TP53_ACTIVITY	68	0.269122	0.794568	0.797535	1	1	750	tags=7%, list=12%, signal=7%	AURKB/POU4F1/KAT5/CDK1/RFC3
REACTOME_ACTIVATION_OF_ANTERIOR_HOX_GENES_IN_HINDBRAIN_DEVELOPMENT_DURING_EARLY_EMBRYOGENESIS	REACTOME_ACTIVATION_OF_ANTERIOR_HOX_GENES_IN_HINDBRAIN_DEVELOPMENT_DURING_EARLY_EMBRYOGENESIS	13	0.362229	0.793595	0.677358	1	1	140	tags=8%, list=2%, signal=8%	RARB
REACTOME_EARLY_SARS_COV_2_INFECTION_EVENTS	REACTOME_EARLY_SARS_COV_2_INFECTION_EVENTS	18	-0.3279	-0.79262	0.715536	1	1	2128	tags=50%, list=35%, signal=32%	PIK3C3/ISCU/CHMP4C/CHMP3/CHMP4B/CHMP2B/GPC4/GPC2/GPC5
REACTOME_MITOTIC_METAPHASE_AND_ANAPHASE	REACTOME_MITOTIC_METAPHASE_AND_ANAPHASE	94	0.256804	0.792085	0.838313	1	1	784	tags=12%, list=13%, signal=10%	AURKB/DYNC1I1/CENPP/CENPE/ANAPC15/CENPL/BIRC5/CDK1/PTTG1/TUBB1/CENPO
REACTOME_AUF1_HNRNP_D0_BINDS_AND_DESTABILIZES_MRNA	REACTOME_AUF1_HNRNP_D0_BINDS_AND_DESTABILIZES_MRNA	16	-0.33739	-0.79135	0.729614	1	1	2209	tags=44%, list=37%, signal=28%	PABPC1/PSMD8/UBC/PSMD12/PSMD13/PSMB8/PSMA2
REACTOME_PHASE_II_CONJUGATION_OF_COMPOUNDS	REACTOME_PHASE_II_CONJUGATION_OF_COMPOUNDS	34	-0.28231	-0.79091	0.778742	1	1	1076	tags=26%, list=18%, signal=22%	UGT2B28/GSTA4/UGT2B11/SULT1E1/SULT4A1/SULT1C4/UGT2A3/GSTM2/UGT2B4
REACTOME_COMPLEX_I_BIOGENESIS	REACTOME_COMPLEX_I_BIOGENESIS	17	-0.33059	-0.78688	0.738095	1	1	1918	tags=47%, list=32%, signal=32%	TIMMDC1/COA1/TMEM126B/NDUFS7/NDUFA9/NDUFAF4/NDUFB8/NDUFA7
REACTOME_ROS_AND_RNS_PRODUCTION_IN_PHAGOCYTES	REACTOME_ROS_AND_RNS_PRODUCTION_IN_PHAGOCYTES	12	-0.35523	-0.7853	0.708423	1	1	619	tags=33%, list=10%, signal=30%	RAC2/ATP6V1E2/NOS3/ATP6V1C2
REACTOME_GLYCOGEN_METABOLISM	REACTOME_GLYCOGEN_METABOLISM	12	0.36362	0.785153	0.701299	1	1	1704	tags=42%, list=28%, signal=30%	PHKG1/GYS1/PHKG2/PGM1/EPM2A
REACTOME_ADORA2B_MEDIATED_ANTI_INFLAMMATORY_CYTOKINES_PRODUCTION	REACTOME_ADORA2B_MEDIATED_ANTI_INFLAMMATORY_CYTOKINES_PRODUCTION	11	-0.36111	-0.78426	0.700855	1	1	272	tags=27%, list=5%, signal=26%	GNG7/GNB5/PRKAR2B
REACTOME_TRANSCRIPTIONAL_REGULATION_BY_MECP2	REACTOME_TRANSCRIPTIONAL_REGULATION_BY_MECP2	21	0.330015	0.783757	0.728814	1	1	175	tags=10%, list=3%, signal=9%	AURKB/CAMK2B
REACTOME_TCR_SIGNALING	REACTOME_TCR_SIGNALING	38	-0.27634	-0.7815	0.80574	1	1	453	tags=16%, list=8%, signal=15%	PSMB8/UBE2D1/CD4/CD101/PSMA2/CD3G
REACTOME_ECM_PROTEOGLYCANS	REACTOME_ECM_PROTEOGLYCANS	25	0.314463	0.780425	0.751852	1	1	500	tags=20%, list=8%, signal=18%	ACAN/TNR/COL4A3/LUM/ITGA2
REACTOME_PROCESSING_OF_CAPPED_INTRONLESS_PRE_MRNA	REACTOME_PROCESSING_OF_CAPPED_INTRONLESS_PRE_MRNA	10	-0.36106	-0.77846	0.700637	1	1	3851	tags=100%, list=64%, signal=36%	SNRPF/PCF11/SYMPK/WDR33/CSTF2/CPSF7/FIP1L1/CSTF1/CPSF4
REACTOME_PKMTS_METHYLATE_HISTONE_LYSINES	REACTOME_PKMTS_METHYLATE_HISTONE_LYSINES	11	0.36454	0.777426	0.720974	1	1	2357	tags=55%, list=39%, signal=33%	KMT5C/SUV39H1/KMT5A/SETD6/MECOM/NFKB2
REACTOME_COLLAGEN_BIOSYNTHESIS_AND_MODIFYING_ENZYMES	REACTOME_COLLAGEN_BIOSYNTHESIS_AND_MODIFYING_ENZYMES	23	-0.30267	-0.77638	0.739606	1	1	519	tags=22%, list=9%, signal=20%	TLL2/COL22A1/PCOLCE2/COL8A1/COL9A3
REACTOME_DISEASES_OF_METABOLISM	REACTOME_DISEASES_OF_METABOLISM	83	0.255999	0.776155	0.84331	1	1	1353	tags=31%, list=22%, signal=25%	MUC16/ACAN/MUC12/ST3GAL3/ADAMTS17/CYP26B1/LUM/ADAMTSL4/KHK/SGSH/MUC4/HPRT1/GYS1/ABCA3/ABCD4/CYP2R1/CYP27B1/RFT1/MCCC1/DHDDS/GUSB/GALE/MOGS/CYP27A1/ADAMTS1/OPLAH
REACTOME_EPHB_MEDIATED_FORWARD_SIGNALING	REACTOME_EPHB_MEDIATED_FORWARD_SIGNALING	18	-0.32049	-0.77469	0.739606	1	1	1283	tags=28%, list=21%, signal=22%	CDC42/EPHB1/EPHB6/EFNB3/TIAM1
REACTOME_TRANSLOCATION_OF_SLC2A4_GLUT4_TO_THE_PLASMA_MEMBRANE	REACTOME_TRANSLOCATION_OF_SLC2A4_GLUT4_TO_THE_PLASMA_MEMBRANE	31	-0.2816	-0.77411	0.784188	1	1	73	tags=19%, list=1%, signal=19%	EXOC1/TBC1D1/RAB4A/PRKAA2/TUBB4A/TUBAL3
REACTOME_KINESINS	REACTOME_KINESINS	28	-0.2868	-0.77402	0.781182	1	1	1041	tags=25%, list=17%, signal=21%	KIF27/TUBB4A/KLC3/KIF2C/KIF18B/KIF26A/TUBAL3
REACTOME_NRAGE_SIGNALS_DEATH_THROUGH_JNK	REACTOME_NRAGE_SIGNALS_DEATH_THROUGH_JNK	16	-0.32886	-0.77134	0.766094	1	1	995	tags=19%, list=17%, signal=16%	ARHGEF4/TIAM1/ARHGEF6
REACTOME_NERVOUS_SYSTEM_DEVELOPMENT	REACTOME_NERVOUS_SYSTEM_DEVELOPMENT	184	-0.21335	-0.77003	0.97027	1	1	1163	tags=21%, list=19%, signal=17%	NRCAM/EFNA3/RPL39L/DLG3/PSMB8/DSCAML1/SLIT2/CDK5/EPHB1/SCN2A/EPHB6/CDK5R1/PIK3R3/AKAP5/TUBB4A/SEMA7A/EFNB3/NELL2/EFNA5/ADGRV1/KCNQ2/DAB1/NTN1/RPL26L1/EPHA5/TIAM1/EPHA6/CACNB4/MYH11/PSMA2/ST8SIA4/LAMA2/SEMA4A/COL9A3/ITGA10/POU3F1/TUBAL3/DOK5
REACTOME_HDACS_DEACETYLATE_HISTONES	REACTOME_HDACS_DEACETYLATE_HISTONES	15	0.341382	0.769556	0.745763	1	1	3970	tags=100%, list=66%, signal=34%	GPS2/SAP30/REST/RCOR1/MTA1/HDAC8/HMG20B/MTA2/RBBP4/ARID4A/HDAC1/SUDS3/ARID4B/SAP30L/MBD3
REACTOME_PCP_CE_PATHWAY	REACTOME_PCP_CE_PATHWAY	29	-0.28281	-0.76618	0.78913	1	1	2061	tags=48%, list=34%, signal=32%	PSMD8/UBC/PSMD12/PSMD13/WNT5B/SMURF2/RYK/FZD6/AP2S1/ROR2/PSMB8/PRICKLE1/RAC2/PSMA2
REACTOME_RHOB_GTPASE_CYCLE	REACTOME_RHOB_GTPASE_CYCLE	23	0.311114	0.762172	0.744954	1	1	2143	tags=52%, list=36%, signal=34%	CIT/MCAM/CAVIN1/DIAPH3/FLOT1/ARHGEF28/VANGL1/SOWAHC/ARHGEF1/MYO9B/ARHGAP1/PCDH7
REACTOME_SARS_COV_1_HOST_INTERACTIONS	REACTOME_SARS_COV_1_HOST_INTERACTIONS	21	0.32031	0.760707	0.758945	1	1	1404	tags=29%, list=23%, signal=22%	BST2/IRAK2/PYCARD/TKFC/SERPINE1/IKBKE
REACTOME_RESPONSE_OF_EIF2AK4_GCN2_TO_AMINO_ACID_DEFICIENCY	REACTOME_RESPONSE_OF_EIF2AK4_GCN2_TO_AMINO_ACID_DEFICIENCY	14	-0.33249	-0.75714	0.754757	1	1	1559	tags=36%, list=26%, signal=27%	RPS23/RPL14/RPL39L/DDIT3/RPL26L1
REACTOME_CELL_DEATH_SIGNALLING_VIA_NRAGE_NRIF_AND_NADE	REACTOME_CELL_DEATH_SIGNALLING_VIA_NRAGE_NRIF_AND_NADE	23	-0.2939	-0.75388	0.765864	1	1	995	tags=22%, list=17%, signal=18%	CASP3/ARHGEF4/ITGB3BP/TIAM1/ARHGEF6
REACTOME_REGULATED_NECROSIS	REACTOME_REGULATED_NECROSIS	22	-0.29662	-0.75357	0.767742	1	1	563	tags=55%, list=9%, signal=50%	UBE2L3/CHMP4C/CHMP3/UBC/CHMP4B/CHMP2B/CASP3/RIPK1/PRKN/CASP4/IL1A/CASP5
REACTOME_METABOLISM_OF_LIPIDS	REACTOME_METABOLISM_OF_LIPIDS	278	0.209327	0.74628	0.983257	1	1	808	tags=10%, list=13%, signal=9%	ACAD11/PLIN1/FABP7/TSPO/LTC4S/ALOX15B/APOA5/OXCT2/ALOXE3/ST3GAL3/ALDH3B1/DEGS2/CYP2J2/HSD3B7/SLC27A1/BAAT/GBA3/PNPLA7/GPS2/ABCC3/NUDT7/GLIPR1/CERS1/B4GALNT1/ALOX15/FITM2/PIK3C2G
REACTOME_GENERATION_OF_SECOND_MESSENGER_MOLECULES	REACTOME_GENERATION_OF_SECOND_MESSENGER_MOLECULES	12	0.345558	0.746153	0.755102	1	1	879	tags=42%, list=15%, signal=36%	WAS/HLA-DRB5/HLA-DQB1/GRAP2/HLA-DRB1
REACTOME_INTERLEUKIN_1_SIGNALING	REACTOME_INTERLEUKIN_1_SIGNALING	41	-0.25707	-0.746	0.849015	1	1	1309	tags=41%, list=22%, signal=33%	FBXW11/TAB2/SQSTM1/PSMD8/UBC/PSMD12/NLRX1/PSMD13/MAP2K1/IL1R2/NLRC5/LRRC14/PSMB8/TIFA/MAP3K8/IL1A/PSMA2
REACTOME_CELL_CYCLE_MITOTIC	REACTOME_CELL_CYCLE_MITOTIC	194	0.216281	0.74486	0.979688	1	1	1748	tags=29%, list=29%, signal=22%	AURKB/DYNC1I1/CENPP/CENPE/MCM10/NCAPG/ANAPC15/CDK11A/CNTRL/CENPL/BIRC5/E2F1/CDK1/CDC25A/POLD4/PTTG1/TUBB1/RFC3/CEP192/CENPO/GINS2/CDC6/GINS4/LIN54/KIF20A/CEP290/CENPQ/VRK1/JAK2/DNA2/SGO2/KMT5A/CHMP6/PHF8/CENPC/HAUS4/PPP2R5B/SIRT2/HAUS5/CDKN2B/NCAPD2/STAG1/MCM6/PPP1R12A/CLASP2/MCPH1/CHMP2A/POLE2/RANGAP1/AURKA/ZWINT/TUBA4A/PRIM1/MCM5/EMD/LMNA/TFDP1
REACTOME_RIPK1_MEDIATED_REGULATED_NECROSIS	REACTOME_RIPK1_MEDIATED_REGULATED_NECROSIS	10	0.354054	0.741458	0.772128	1	1	1562	tags=40%, list=26%, signal=30%	MLKL/TRADD/FADD/FLOT1
REACTOME_SIGNALING_BY_TGFBR3	REACTOME_SIGNALING_BY_TGFBR3	14	-0.32451	-0.73896	0.780127	1	1	4072	tags=100%, list=68%, signal=32%	ARRB1/TGFBR1/APH1A/MYCN/TCF3/PSEN2/RARA/APH1B/SMAD4/TCF12/TCF4/INHBA/FGF2
REACTOME_INTERLEUKIN_10_SIGNALING	REACTOME_INTERLEUKIN_10_SIGNALING	11	0.345469	0.736754	0.775281	1	1	482	tags=18%, list=8%, signal=17%	IL12A/CXCL10
REACTOME_METABOLISM_OF_STEROIDS	REACTOME_METABOLISM_OF_STEROIDS	48	0.261396	0.736019	0.864376	1	1	1325	tags=21%, list=22%, signal=16%	TSPO/HSD3B7/BAAT/ABCC3/CYP2R1/CYP27B1/STARD3/NFYA/CYP27A1/INSIG2
REACTOME_CELLULAR_RESPONSES_TO_STIMULI	REACTOME_CELLULAR_RESPONSES_TO_STIMULI	203	0.21186	0.734784	0.979719	1	1	643	tags=9%, list=11%, signal=8%	IGFBP1/CAMK2B/DYNC1I1/HSPA6/MT2A/NOX4/SRXN1/ANAPC15/HSPA2/ATP6V1G2/WTIP/CRYAB/KAT5/NCF2/DNAJA4/TLR4/E2F1/ABCC3
REACTOME_INSERTION_OF_TAIL_ANCHORED_PROTEINS_INTO_THE_ENDOPLASMIC_RETICULUM_MEMBRANE	REACTOME_INSERTION_OF_TAIL_ANCHORED_PROTEINS_INTO_THE_ENDOPLASMIC_RETICULUM_MEMBRANE	12	0.339724	0.733555	0.773655	1	1	350	tags=8%, list=6%, signal=8%	GET4
REACTOME_ACTIVATION_OF_ATR_IN_RESPONSE_TO_REPLICATION_STRESS	REACTOME_ACTIVATION_OF_ATR_IN_RESPONSE_TO_REPLICATION_STRESS	18	0.310464	0.731955	0.761468	1	1	897	tags=22%, list=15%, signal=19%	MCM10/CDC25A/RFC3/CDC6
REACTOME_SIGNALING_BY_RHO_GTPASES_MIRO_GTPASES_AND_RHOBTB3	REACTOME_SIGNALING_BY_RHO_GTPASES_MIRO_GTPASES_AND_RHOBTB3	239	-0.19488	-0.73156	0.991935	1	1	911	tags=13%, list=15%, signal=11%	PIK3R3/MUC13/TUBB4A/KLC3/ARHGAP20/DEF6/ARHGAP4/RHPN1/CDC25C/KIF2C/CENPK/RAC2/CDCA8/FMNL3/ACTC1/ERCC6L/CCDC187/PLEKHG4B/TIAM1/ARHGAP22/TAX1BP3/NUF2/MYH11/UBXN11/ARHGEF6/ARHGAP6/FILIP1/ARHGAP9/TUBAL3/HTR7
REACTOME_DISEASES_OF_MITOTIC_CELL_CYCLE	REACTOME_DISEASES_OF_MITOTIC_CELL_CYCLE	12	0.338799	0.731559	0.773655	1	1	637	tags=17%, list=11%, signal=15%	ANAPC15/E2F1
REACTOME_RESPIRATORY_SYNCYTIAL_VIRUS_INFECTION_PATHWAY	REACTOME_RESPIRATORY_SYNCYTIAL_VIRUS_INFECTION_PATHWAY	37	-0.261	-0.73127	0.874449	1	1	1512	tags=30%, list=25%, signal=22%	MED27/JAK1/MED9/UBE2L6/GPC4/MED19/IFIH1/GPC2/MED26/TLR6/GPC5
REACTOME_NONSENSE_MEDIATED_DECAY_NMD	REACTOME_NONSENSE_MEDIATED_DECAY_NMD	21	-0.28849	-0.73039	0.802548	1	1	2461	tags=57%, list=41%, signal=34%	ETF1/RBM8A/SMG6/UPF3A/PABPC1/RPL22L1/PPP2R2A/EIF4A3/RPS23/RPL14/RPL39L/RPL26L1
REACTOME_RND3_GTPASE_CYCLE	REACTOME_RND3_GTPASE_CYCLE	14	-0.32069	-0.73028	0.792812	1	1	1241	tags=21%, list=21%, signal=17%	NISCH/MUC13/UBXN11
REACTOME_ANTIMICROBIAL_PEPTIDES	REACTOME_ANTIMICROBIAL_PEPTIDES	11	0.341918	0.729181	0.784644	1	1	476	tags=18%, list=8%, signal=17%	LEAP2/BPIFA1
REACTOME_ANTIVIRAL_MECHANISM_BY_IFN_STIMULATED_GENES	REACTOME_ANTIVIRAL_MECHANISM_BY_IFN_STIMULATED_GENES	49	0.257149	0.728984	0.872072	1	1	751	tags=12%, list=12%, signal=11%	KPNA7/HSPA2/HERC5/CDK1/TUBB1/FANCE
REACTOME_VASOPRESSIN_REGULATES_RENAL_WATER_HOMEOSTASIS_VIA_AQUAPORINS	REACTOME_VASOPRESSIN_REGULATES_RENAL_WATER_HOMEOSTASIS_VIA_AQUAPORINS	14	0.329116	0.728756	0.776938	1	1	1432	tags=36%, list=24%, signal=27%	AQP1/ADCY9/RAB11FIP2/AQP4/ADCY2
REACTOME_M_PHASE	REACTOME_M_PHASE	133	0.221839	0.728336	0.961345	1	1	784	tags=11%, list=13%, signal=9%	AURKB/DYNC1I1/CENPP/CENPE/NCAPG/ANAPC15/CNTRL/CENPL/BIRC5/CDK1/PTTG1/TUBB1/CEP192/CENPO
REACTOME_HCMV_EARLY_EVENTS	REACTOME_HCMV_EARLY_EVENTS	27	-0.27304	-0.72784	0.834061	1	1	73	tags=26%, list=1%, signal=26%	NUP93/NUP133/EED/NUP54/DYNLL1/TUBB4A/TUBAL3
REACTOME_DISEASES_OF_GLYCOSYLATION	REACTOME_DISEASES_OF_GLYCOSYLATION	49	0.256551	0.72729	0.872072	1	1	518	tags=14%, list=9%, signal=13%	MUC16/ACAN/MUC12/ST3GAL3/ADAMTS17/LUM/ADAMTSL4
REACTOME_GPER1_SIGNALING	REACTOME_GPER1_SIGNALING	12	-0.32896	-0.72723	0.775378	1	1	272	tags=25%, list=5%, signal=24%	GNG7/GNB5/PRKAR2B
REACTOME_BILE_ACID_AND_BILE_SALT_METABOLISM	REACTOME_BILE_ACID_AND_BILE_SALT_METABOLISM	15	0.322578	0.727166	0.781544	1	1	643	tags=20%, list=11%, signal=18%	HSD3B7/BAAT/ABCC3
REACTOME_DEGRADATION_OF_BETA_CATENIN_BY_THE_DESTRUCTION_COMPLEX	REACTOME_DEGRADATION_OF_BETA_CATENIN_BY_THE_DESTRUCTION_COMPLEX	25	-0.27753	-0.72703	0.809524	1	1	497	tags=32%, list=8%, signal=29%	PSMD8/PPP2CB/UBC/PSMD12/PSMD13/PSMB8/LEF1/PSMA2
REACTOME_METABOLISM_OF_VITAMINS_AND_COFACTORS	REACTOME_METABOLISM_OF_VITAMINS_AND_COFACTORS	83	-0.22376	-0.72567	0.910138	1	1	1377	tags=24%, list=23%, signal=19%	NMNAT1/THTPA/SLC23A1/GPC4/APOM/TPK1/GPC2/PDZD11/NT5E/COQ6/LRAT/SLC2A3/NMNAT3/MTHFS/PTGIS/BST1/AKR1B10/NOS3/PRSS3/GPC5
REACTOME_NON_INTEGRIN_MEMBRANE_ECM_INTERACTIONS	REACTOME_NON_INTEGRIN_MEMBRANE_ECM_INTERACTIONS	23	0.294744	0.722069	0.792661	1	1	2587	tags=78%, list=43%, signal=45%	COL4A3/ITGA2/DDR2/COL5A2/COL4A1/ITGB4/COL4A2/LAMB3/AGRN/VTN/LAMB1/LAMB2/COL4A5/COL4A6/PRKCA/TRAPPC4/NTN4/SDC1
REACTOME_SUMOYLATION_OF_TRANSCRIPTION_COFACTORS	REACTOME_SUMOYLATION_OF_TRANSCRIPTION_COFACTORS	12	-0.32624	-0.72123	0.777538	1	1	2716	tags=75%, list=45%, signal=41%	BMI1/RNF2/MRTFA/PCGF2/ING2/DAXX/PIAS1/SUMO3/PPARGC1A
REACTOME_DEGRADATION_OF_DVL	REACTOME_DEGRADATION_OF_DVL	16	-0.30727	-0.72071	0.811159	1	1	2061	tags=38%, list=34%, signal=25%	PSMD8/UBC/PSMD12/PSMD13/PSMB8/PSMA2
REACTOME_MEMBRANE_TRAFFICKING	REACTOME_MEMBRANE_TRAFFICKING	255	-0.19118	-0.7203	0.991597	1	1	460	tags=4%, list=8%, signal=4%	PLA2G4A/DENND6B/GJB4/KIF18B/KIF26A/F8/TUBAL3/CD3G/RAB41/SH3GL3/GJB7
REACTOME_MET_ACTIVATES_PTK2_SIGNALING	REACTOME_MET_ACTIVATES_PTK2_SIGNALING	10	0.34296	0.718226	0.80791	1	1	2099	tags=80%, list=35%, signal=52%	COL24A1/ITGA2/COL5A2/ITGA3/LAMB3/MET/LAMB1/LAMB2
REACTOME_REGULATION_OF_HSF1_MEDIATED_HEAT_SHOCK_RESPONSE	REACTOME_REGULATION_OF_HSF1_MEDIATED_HEAT_SHOCK_RESPONSE	29	0.280426	0.71573	0.846863	1	1	401	tags=7%, list=7%, signal=6%	HSPA6/HSPA2
REACTOME_DNA_DOUBLE_STRAND_BREAK_REPAIR	REACTOME_DNA_DOUBLE_STRAND_BREAK_REPAIR	57	-0.23452	-0.71524	0.896396	1	1	780	tags=12%, list=13%, signal=11%	BABAM2/RAD51C/RAD51AP1/RAD52/XRCC2/ATRIP/NHEJ1
REACTOME_MITOTIC_PROPHASE	REACTOME_MITOTIC_PROPHASE	28	0.281329	0.714725	0.842202	1	1	2765	tags=61%, list=46%, signal=33%	CDK1/VRK1/KMT5A/PHF8/MCPH1/EMD/LMNA/SEH1L/CNEP1R1/CCNB1/GOLGA2/PRKCA/NEK9/POM121C/NDC1/LMNB1/NUP50
REACTOME_NETRIN_1_SIGNALING	REACTOME_NETRIN_1_SIGNALING	15	0.316837	0.714224	0.798493	1	1	1020	tags=20%, list=17%, signal=17%	SLIT1/UNC5A/SLIT3
REACTOME_COPI_DEPENDENT_GOLGI_TO_ER_RETROGRADE_TRAFFIC	REACTOME_COPI_DEPENDENT_GOLGI_TO_ER_RETROGRADE_TRAFFIC	44	-0.24392	-0.71384	0.898268	1	1	1041	tags=18%, list=17%, signal=15%	KIF27/BNIP1/TUBB4A/KLC3/KIF2C/KIF18B/KIF26A/TUBAL3
REACTOME_ANTIGEN_PROCESSING_CROSS_PRESENTATION	REACTOME_ANTIGEN_PROCESSING_CROSS_PRESENTATION	29	0.279269	0.712775	0.852399	1	1	631	tags=14%, list=10%, signal=12%	MRC1/MRC2/NCF2/TLR4
REACTOME_RAB_GERANYLGERANYLATION	REACTOME_RAB_GERANYLGERANYLATION	31	0.275204	0.709979	0.850187	1	1	656	tags=16%, list=11%, signal=14%	RAB39A/RAB9B/RAB26/RAB24/RAB13
REACTOME_COMMON_PATHWAY_OF_FIBRIN_CLOT_FORMATION	REACTOME_COMMON_PATHWAY_OF_FIBRIN_CLOT_FORMATION	10	-0.32847	-0.7082	0.779193	1	1	171	tags=30%, list=3%, signal=29%	SERPINE2/F10/F8
REACTOME_REGULATION_OF_PYRUVATE_METABOLISM	REACTOME_REGULATION_OF_PYRUVATE_METABOLISM	12	-0.32032	-0.70813	0.790497	1	1	729	tags=17%, list=12%, signal=15%	PDK2/PDK4
REACTOME_RHOJ_GTPASE_CYCLE	REACTOME_RHOJ_GTPASE_CYCLE	20	0.298924	0.707228	0.800752	1	1	156	tags=5%, list=3%, signal=5%	WAS
REACTOME_SUMOYLATION_OF_UBIQUITINYLATION_PROTEINS	REACTOME_SUMOYLATION_OF_UBIQUITINYLATION_PROTEINS	12	-0.31983	-0.70704	0.792657	1	1	1832	tags=92%, list=30%, signal=64%	POM121C/NDC1/NUP50/PIAS4/NUP107/NUP205/PIAS1/NUP93/NUP133/MDM2/NUP54
REACTOME_PLASMA_LIPOPROTEIN_ASSEMBLY_REMODELING_AND_CLEARANCE	REACTOME_PLASMA_LIPOPROTEIN_ASSEMBLY_REMODELING_AND_CLEARANCE	19	0.298855	0.70545	0.79925	1	1	1832	tags=37%, list=30%, signal=26%	APOA5/LMF1/APOA4/PCSK5/NPC1/PCSK9/NCEH1
REACTOME_G_ALPHA_Z_SIGNALLING_EVENTS	REACTOME_G_ALPHA_Z_SIGNALLING_EVENTS	14	0.318322	0.704855	0.801512	1	1	761	tags=21%, list=13%, signal=19%	ADRA2C/RGS19/ADCY9
REACTOME_RHOQ_GTPASE_CYCLE	REACTOME_RHOQ_GTPASE_CYCLE	24	0.286187	0.702338	0.806273	1	1	2695	tags=58%, list=45%, signal=32%	SRGAP2/GFOD1/DIAPH3/ARHGAP33/SLC4A7/VANGL1/ARHGAP1/GJA1/CDC42EP4/GIT1/TRIP10/SCRIB/CDC42EP1/PAK2
REACTOME_RUNX1_INTERACTS_WITH_CO_FACTORS_WHOSE_PRECISE_EFFECT_ON_RUNX1_TARGETS_IS_NOT_KNOWN	REACTOME_RUNX1_INTERACTS_WITH_CO_FACTORS_WHOSE_PRECISE_EFFECT_ON_RUNX1_TARGETS_IS_NOT_KNOWN	10	-0.32562	-0.70203	0.789809	1	1	1362	tags=30%, list=23%, signal=23%	AUTS2/SMARCD3/YAF2
REACTOME_POSITIVE_EPIGENETIC_REGULATION_OF_RRNA_EXPRESSION	REACTOME_POSITIVE_EPIGENETIC_REGULATION_OF_RRNA_EXPRESSION	14	-0.30803	-0.70142	0.824524	1	1	4171	tags=100%, list=69%, signal=31%	MTA1/POLR1B/DDX21/TBP/SMARCA5/MTA2/RBBP4/TTF1/HDAC1/MBD3/TAF1C/POLR2F/TAF1A
REACTOME_ABC_TRANSPORTER_DISORDERS	REACTOME_ABC_TRANSPORTER_DISORDERS	20	-0.2802	-0.70063	0.829787	1	1	551	tags=35%, list=9%, signal=32%	PSMD8/UBC/PSMD12/PSMD13/PSMB8/ABCB4/PSMA2
REACTOME_MRNA_SPLICING_MINOR_PATHWAY	REACTOME_MRNA_SPLICING_MINOR_PATHWAY	14	-0.30724	-0.69964	0.826638	1	1	1759	tags=36%, list=29%, signal=25%	SNRNP40/POLR2F/SRSF6/SNRNP25/SNRNP35
REACTOME_CARGO_CONCENTRATION_IN_THE_ER	REACTOME_CARGO_CONCENTRATION_IN_THE_ER	13	-0.30913	-0.69761	0.805085	1	1	171	tags=15%, list=3%, signal=15%	CTSC/F8
REACTOME_SUMOYLATION_OF_DNA_DAMAGE_RESPONSE_AND_REPAIR_PROTEINS	REACTOME_SUMOYLATION_OF_DNA_DAMAGE_RESPONSE_AND_REPAIR_PROTEINS	29	-0.25732	-0.69714	0.856522	1	1	2716	tags=59%, list=45%, signal=32%	BMI1/RNF2/PARP1/STAG2/RNF168/PCGF2/TDG/SP100/PIAS1/NUP93/XPC/NUP133/SUMO3/NUP54/NSMCE3/SMC6/RAD52
REACTOME_SPHINGOLIPID_DE_NOVO_BIOSYNTHESIS	REACTOME_SPHINGOLIPID_DE_NOVO_BIOSYNTHESIS	15	0.308909	0.696353	0.806026	1	1	695	tags=13%, list=12%, signal=12%	DEGS2/CERS1
REACTOME_SYNDECAN_INTERACTIONS	REACTOME_SYNDECAN_INTERACTIONS	10	0.332004	0.695282	0.832392	1	1	1245	tags=30%, list=21%, signal=24%	ITGA2/COL5A2/ITGB4
REACTOME_LAGGING_STRAND_SYNTHESIS	REACTOME_LAGGING_STRAND_SYNTHESIS	11	0.325716	0.694628	0.825843	1	1	1181	tags=27%, list=20%, signal=22%	POLD4/RFC3/DNA2
REACTOME_ASPARAGINE_N_LINKED_GLYCOSYLATION	REACTOME_ASPARAGINE_N_LINKED_GLYCOSYLATION	114	-0.20567	-0.69418	0.972637	1	1	237	tags=4%, list=4%, signal=3%	ST8SIA4/F8/TUBAL3/ST6GALNAC6
REACTOME_SIGNALING_BY_BMP	REACTOME_SIGNALING_BY_BMP	10	-0.32134	-0.69282	0.804671	1	1	2254	tags=70%, list=37%, signal=44%	SMAD4/FSTL1/ACVRL1/ZFYVE16/SMURF2/INHBA/UBE2D1
REACTOME_MRNA_SPLICING	REACTOME_MRNA_SPLICING	67	-0.22207	-0.69265	0.930876	1	1	4699	tags=100%, list=78%, signal=22%	ISY1/LENG1/RBM25/GPKOW/YJU2/HNRNPR/LSM8/PDCD7/CWF19L2/HNRNPD/NCBP1/SRSF12/WBP4/SMNDC1/HNRNPU/DHX35/DDX46/SNRPF/SNRNP48/DDX23/LUC7L3/CHERP/SF3A2/SDE2/HNRNPK/PPIG/ACIN1/PRCC/WBP11/RBM5/RBM39/PCBP2/POLR2B/DHX9/C9orf78/PRPF40A/GTF2F1/HNRNPA3/RBM8A/SNRPD1/PRPF19/SRSF8/RBMX/BUD13/DHX38/DHX16/USP39/DNAJC8/PPIE/SNRNP40/CDC40/POLR2F/PPIL1/SUGP1/EIF4A3/SRSF6/BUD31/CRNKL1/PNN/SRRM1/RBM17/DDX39B/ZNF830/RBMX2…
REACTOME_DOWNSTREAM_SIGNAL_TRANSDUCTION	REACTOME_DOWNSTREAM_SIGNAL_TRANSDUCTION	12	-0.31325	-0.6925	0.809935	1	1	4139	tags=100%, list=69%, signal=31%	RAPGEF1/RASA1/SRC/PTPN11/CRKL/STAT6/PDGFA/PIK3CB/NCK1/STAT1/STAT5B
REACTOME_TRANSPORT_OF_MATURE_MRNAS_DERIVED_FROM_INTRONLESS_TRANSCRIPTS	REACTOME_TRANSPORT_OF_MATURE_MRNAS_DERIVED_FROM_INTRONLESS_TRANSCRIPTS	16	-0.29464	-0.69107	0.83691	1	1	4252	tags=100%, list=71%, signal=29%	NCBP1/POM121C/NDC1/SYMPK/NUP50/EIF4E/WDR33/NUP107/NUP205/FIP1L1/NUP93/NXF1/NUP133/NUP54/CPSF4
REACTOME_HSP90_CHAPERONE_CYCLE_FOR_STEROID_HORMONE_RECEPTORS_SHR_IN_THE_PRESENCE_OF_LIGAND	REACTOME_HSP90_CHAPERONE_CYCLE_FOR_STEROID_HORMONE_RECEPTORS_SHR_IN_THE_PRESENCE_OF_LIGAND	21	0.290975	0.691041	0.834275	1	1	746	tags=19%, list=12%, signal=17%	DYNC1I1/HSPA2/DNAJA4/TUBB1
REACTOME_PLATELET_AGGREGATION_PLUG_FORMATION	REACTOME_PLATELET_AGGREGATION_PLUG_FORMATION	12	-0.31163	-0.68892	0.812095	1	1	146	tags=17%, list=2%, signal=16%	ADRA2A/RAPGEF3
REACTOME_RAB_GEFS_EXCHANGE_GTP_FOR_GDP_ON_RABS	REACTOME_RAB_GEFS_EXCHANGE_GTP_FOR_GDP_ON_RABS	39	0.254739	0.685724	0.890511	1	1	1472	tags=21%, list=24%, signal=16%	RAB39A/RAB9B/RAB13/RAB3IL1/TRAPPC6A/SBF1/RAB32/DENND1B
REACTOME_AMYLOID_FIBER_FORMATION	REACTOME_AMYLOID_FIBER_FORMATION	18	0.290798	0.685591	0.822018	1	1	1573	tags=39%, list=26%, signal=29%	INS/LTF/IAPP/TSPAN33/TSPAN15/APOA4/GGA3
REACTOME_PROGRAMMED_CELL_DEATH	REACTOME_PROGRAMMED_CELL_DEATH	68	-0.21834	-0.6843	0.93318	1	1	563	tags=24%, list=9%, signal=22%	UNC5B/CHMP2B/PPP3R1/CASP3/DYNLL1/RIPK1/AKT3/PSMB8/PRKN/DFFB/CASP4/DIABLO/GAS2/IL1A/PSMA2/CASP5
REACTOME_MITOTIC_G2_G2_M_PHASES	REACTOME_MITOTIC_G2_G2_M_PHASES	71	-0.21774	-0.68329	0.932401	1	1	893	tags=11%, list=15%, signal=10%	TUBB4A/FOXM1/CDC25C/CEP152/FBXL7/PSMA2/PRKAR2B/TUBAL3
REACTOME_ELASTIC_FIBRE_FORMATION	REACTOME_ELASTIC_FIBRE_FORMATION	17	-0.28627	-0.6814	0.84632	1	1	1027	tags=29%, list=17%, signal=24%	TGFB3/FBLN5/EFEMP2/MFAP2/ITGA8
REACTOME_SNRNP_ASSEMBLY	REACTOME_SNRNP_ASSEMBLY	15	-0.29459	-0.68092	0.842887	1	1	4252	tags=93%, list=71%, signal=27%	NCBP1/PRMT5/POM121C/SNRPF/NDC1/NUP50/NUP107/NUP205/SNRPD1/NUP93/NUP133/NUP54/GEMIN8/DDX20
REACTOME_FCERI_MEDIATED_NF_KB_ACTIVATION	REACTOME_FCERI_MEDIATED_NF_KB_ACTIVATION	24	-0.2627	-0.68054	0.858696	1	1	2258	tags=42%, list=38%, signal=26%	FBXW11/TAB2/PSMD8/BCL10/UBC/PSMD12/PSMD13/PSMB8/UBE2D1/PSMA2
REACTOME_MHC_CLASS_II_ANTIGEN_PRESENTATION	REACTOME_MHC_CLASS_II_ANTIGEN_PRESENTATION	46	-0.22939	-0.68047	0.909287	1	1	965	tags=20%, list=16%, signal=17%	CTSC/TUBB4A/KLC3/CTSV/KIF2C/CTSK/HLA-DOA/KIF26A/TUBAL3
REACTOME_REGULATION_OF_INSULIN_SECRETION	REACTOME_REGULATION_OF_INSULIN_SECRETION	31	0.262284	0.676647	0.882022	1	1	1143	tags=26%, list=19%, signal=21%	GNA14/ADRA2C/CACNB2/KCNB1/INS/SLC2A1/GLP1R/RAPGEF4
REACTOME_NUCLEAR_ENVELOPE_NE_REASSEMBLY	REACTOME_NUCLEAR_ENVELOPE_NE_REASSEMBLY	36	-0.23901	-0.67439	0.906183	1	1	73	tags=31%, list=1%, signal=30%	CHMP4C/CHMP3/LBR/CHMP4B/NUP93/PPP2R2A/NUP133/CHMP2B/NUP54/TUBB4A/TUBAL3
REACTOME_DISEASES_OF_SIGNAL_TRANSDUCTION_BY_GROWTH_FACTOR_RECEPTORS_AND_SECOND_MESSENGERS	REACTOME_DISEASES_OF_SIGNAL_TRANSDUCTION_BY_GROWTH_FACTOR_RECEPTORS_AND_SECOND_MESSENGERS	150	-0.19269	-0.67289	0.992228	1	1	161	tags=4%, list=3%, signal=4%	PSMA2/HEYL/FGF5/KL/FGF17/ALK
REACTOME_METABOLISM_OF_WATER_SOLUBLE_VITAMINS_AND_COFACTORS	REACTOME_METABOLISM_OF_WATER_SOLUBLE_VITAMINS_AND_COFACTORS	48	-0.22813	-0.67174	0.930958	1	1	1377	tags=25%, list=23%, signal=19%	NMNAT1/THTPA/SLC23A1/TPK1/PDZD11/NT5E/SLC2A3/NMNAT3/MTHFS/PTGIS/BST1/PRSS3
REACTOME_GAP_FILLING_DNA_REPAIR_SYNTHESIS_AND_LIGATION_IN_GG_NER	REACTOME_GAP_FILLING_DNA_REPAIR_SYNTHESIS_AND_LIGATION_IN_GG_NER	13	0.306113	0.670652	0.84717	1	1	1709	tags=38%, list=28%, signal=28%	POLD4/RFC3/XRCC1/POLE2/LIG3
REACTOME_L1CAM_INTERACTIONS	REACTOME_L1CAM_INTERACTIONS	41	0.246428	0.669492	0.902752	1	1	888	tags=17%, list=15%, signal=15%	SCN5A/SCN1B/ITGA2/DLG4/RPS6KA5/TUBB1/KIF4A
REACTOME_DNA_DAMAGE_BYPASS	REACTOME_DNA_DAMAGE_BYPASS	19	0.283589	0.669415	0.851782	1	1	972	tags=21%, list=16%, signal=18%	POLD4/RFC3/USP43/POLI
REACTOME_AZATHIOPRINE_ADME	REACTOME_AZATHIOPRINE_ADME	10	0.319369	0.668821	0.847458	1	1	849	tags=20%, list=14%, signal=17%	XDH/HPRT1
REACTOME_SIGNALING_BY_HEDGEHOG	REACTOME_SIGNALING_BY_HEDGEHOG	52	-0.22272	-0.66766	0.935556	1	1	1077	tags=15%, list=18%, signal=13%	PSMB8/INTU/TUBB4A/IFT52/WDR35/PSMA2/PRKAR2B/GPC5
REACTOME_RND1_GTPASE_CYCLE	REACTOME_RND1_GTPASE_CYCLE	16	-0.28459	-0.66752	0.871245	1	1	1179	tags=19%, list=20%, signal=15%	EPSTI1/MUC13/UBXN11
REACTOME_BIOLOGICAL_OXIDATIONS	REACTOME_BIOLOGICAL_OXIDATIONS	64	0.227543	0.664538	0.945355	1	1	1353	tags=28%, list=22%, signal=22%	CYP2A6/AKR7L/CYP2J2/ACSM2A/GLYATL2/CYP26B1/CHAC2/UGT2B7/GSTM4/GSTO2/CYP2R1/CYP27B1/AKR7A2/CYP2C8/CYP27A1/ACY3/SULT2A1/OPLAH
REACTOME_COLLAGEN_FORMATION	REACTOME_COLLAGEN_FORMATION	32	-0.23976	-0.66366	0.906582	1	1	1164	tags=22%, list=19%, signal=18%	TLL2/COL22A1/MMP13/CTSV/PCOLCE2/COL8A1/COL9A3
REACTOME_PHASE_I_FUNCTIONALIZATION_OF_COMPOUNDS	REACTOME_PHASE_I_FUNCTIONALIZATION_OF_COMPOUNDS	27	0.263921	0.662084	0.878676	1	1	443	tags=11%, list=7%, signal=10%	CYP2A6/CYP2J2/CYP26B1
REACTOME_AMINO_ACID_TRANSPORT_ACROSS_THE_PLASMA_MEMBRANE	REACTOME_AMINO_ACID_TRANSPORT_ACROSS_THE_PLASMA_MEMBRANE	15	-0.28614	-0.66139	0.861996	1	1	1493	tags=33%, list=25%, signal=25%	SLC7A6/SLC6A12/SLC7A3/SLC6A15/SLC7A10
REACTOME_GOLGI_TO_ER_RETROGRADE_TRANSPORT	REACTOME_GOLGI_TO_ER_RETROGRADE_TRANSPORT	53	-0.21837	-0.66026	0.940397	1	1	1041	tags=17%, list=17%, signal=14%	KIF27/BNIP1/TUBB4A/KLC3/KIF2C/PLA2G4A/KIF18B/KIF26A/TUBAL3
REACTOME_NUCLEAR_ENVELOPE_BREAKDOWN	REACTOME_NUCLEAR_ENVELOPE_BREAKDOWN	20	0.278757	0.659514	0.857143	1	1	2765	tags=65%, list=46%, signal=35%	CDK1/VRK1/EMD/LMNA/SEH1L/CNEP1R1/CCNB1/PRKCA/NEK9/POM121C/NDC1/LMNB1/NUP50
REACTOME_VESICLE_MEDIATED_TRANSPORT	REACTOME_VESICLE_MEDIATED_TRANSPORT	261	-0.17506	-0.65908	0.997143	1	1	460	tags=4%, list=8%, signal=4%	PLA2G4A/DENND6B/GJB4/KIF18B/KIF26A/F8/TUBAL3/CD3G/RAB41/SH3GL3/GJB7
REACTOME_FC_EPSILON_RECEPTOR_FCERI_SIGNALING	REACTOME_FC_EPSILON_RECEPTOR_FCERI_SIGNALING	37	-0.23488	-0.6581	0.940529	1	1	530	tags=38%, list=9%, signal=35%	FBXW11/TAB2/JUN/PSMD8/BCL10/UBC/PSMD12/PSMD13/PPP3R1/PSMB8/UBE2D1/LAT2/NFATC1/PSMA2
REACTOME_HEDGEHOG_OFF_STATE	REACTOME_HEDGEHOG_OFF_STATE	40	-0.22943	-0.65703	0.944444	1	1	1077	tags=18%, list=18%, signal=14%	PSMB8/INTU/TUBB4A/IFT52/WDR35/PSMA2/PRKAR2B
REACTOME_TRANSCRIPTIONAL_REGULATION_BY_RUNX2	REACTOME_TRANSCRIPTIONAL_REGULATION_BY_RUNX2	38	0.243799	0.656069	0.905282	1	1	670	tags=8%, list=11%, signal=7%	DLX6/HEY2/CDK1
REACTOME_INTRA_GOLGI_AND_RETROGRADE_GOLGI_TO_ER_TRAFFIC	REACTOME_INTRA_GOLGI_AND_RETROGRADE_GOLGI_TO_ER_TRAFFIC	81	-0.20436	-0.65575	0.972093	1	1	460	tags=14%, list=8%, signal=13%	KIF27/BNIP1/RAB43/TUBB4A/KLC3/KIF2C/PLA2G4A/KIF18B/KIF26A/TUBAL3/RAB41
REACTOME_NEGATIVE_REGULATION_OF_MAPK_PATHWAY	REACTOME_NEGATIVE_REGULATION_OF_MAPK_PATHWAY	15	0.290591	0.655061	0.847458	1	1	4275	tags=100%, list=71%, signal=29%	DUSP2/PPP2R5B/DUSP9/DUSP7/PPP2R5A/DUSP6/PPP5C/PPP2R1B/ARAF/BRAP/RAF1/PPP2CB/UBC/MAP2K1/DUSP8
REACTOME_NOTCH1_INTRACELLULAR_DOMAIN_REGULATES_TRANSCRIPTION	REACTOME_NOTCH1_INTRACELLULAR_DOMAIN_REGULATES_TRANSCRIPTION	14	-0.2876	-0.65491	0.864693	1	1	161	tags=14%, list=3%, signal=14%	NOTCH1/HEYL
REACTOME_PROTEIN_FOLDING	REACTOME_PROTEIN_FOLDING	31	-0.23755	-0.65303	0.918803	1	1	315	tags=13%, list=5%, signal=12%	TUBB4A/TBCE/FBXO4/TUBAL3
REACTOME_ASSEMBLY_OF_COLLAGEN_FIBRILS_AND_OTHER_MULTIMERIC_STRUCTURES	REACTOME_ASSEMBLY_OF_COLLAGEN_FIBRILS_AND_OTHER_MULTIMERIC_STRUCTURES	23	-0.25424	-0.65215	0.888403	1	1	210	tags=17%, list=3%, signal=17%	MMP13/CTSV/COL8A1/COL9A3
REACTOME_DNA_REPLICATION	REACTOME_DNA_REPLICATION	44	0.238008	0.651609	0.933333	1	1	901	tags=16%, list=15%, signal=14%	MCM10/ANAPC15/POLD4/RFC3/GINS2/CDC6/GINS4
REACTOME_TRANSCRIPTIONAL_REGULATION_BY_SMALL_RNAS	REACTOME_TRANSCRIPTIONAL_REGULATION_BY_SMALL_RNAS	12	-0.29444	-0.65092	0.848812	1	1	4252	tags=92%, list=71%, signal=27%	POM121C/IPO8/NDC1/NUP50/NUP107/NUP205/POLR2B/NUP93/NUP133/POLR2F/NUP54
REACTOME_TRANSPORT_OF_THE_SLBP_DEPENDANT_MATURE_MRNA	REACTOME_TRANSPORT_OF_THE_SLBP_DEPENDANT_MATURE_MRNA	12	-0.29444	-0.65092	0.848812	1	1	4252	tags=100%, list=71%, signal=29%	NCBP1/POM121C/NDC1/NUP50/EIF4E/NUP107/NUP205/NUP93/NXF1/NUP133/NUP54
REACTOME_VIRAL_MESSENGER_RNA_SYNTHESIS	REACTOME_VIRAL_MESSENGER_RNA_SYNTHESIS	12	-0.29444	-0.65092	0.848812	1	1	4252	tags=92%, list=71%, signal=27%	POM121C/NDC1/NUP50/NUP107/NUP205/POLR2B/GTF2F1/NUP93/NUP133/POLR2F/NUP54
REACTOME_DRUG_ADME	REACTOME_DRUG_ADME	35	0.247886	0.65008	0.920904	1	1	924	tags=20%, list=15%, signal=17%	SLC22A2/XDH/ACSM2A/GLYATL2/ABCC3/HPRT1/UGT2B7
REACTOME_TGF_BETA_RECEPTOR_SIGNALING_ACTIVATES_SMADS	REACTOME_TGF_BETA_RECEPTOR_SIGNALING_ACTIVATES_SMADS	15	-0.28062	-0.64863	0.870488	1	1	164	tags=47%, list=3%, signal=46%	UBC/STRAP/SMURF2/PPP1CC/SMAD2/TGFB3/ITGA8
REACTOME_PKR_MEDIATED_SIGNALING	REACTOME_PKR_MEDIATED_SIGNALING	29	-0.23936	-0.64848	0.9	1	1	73	tags=7%, list=1%, signal=7%	TUBB4A/TUBAL3
REACTOME_UB_SPECIFIC_PROCESSING_PROTEASES	REACTOME_UB_SPECIFIC_PROCESSING_PROTEASES	59	-0.21235	-0.64767	0.951724	1	1	2166	tags=37%, list=36%, signal=24%	HGS/WDR48/PSMD8/WDR20/UBC/PSMD12/POLB/PSMD13/SMURF2/SMAD2/DDB2/USP49/MDM2/RCE1/USP2/RIPK1/IFIH1/USP30/PSMB8/GATA3/PSMA2/USP44
REACTOME_REGULATION_OF_RAS_BY_GAPS	REACTOME_REGULATION_OF_RAS_BY_GAPS	18	-0.26779	-0.64732	0.901532	1	1	2061	tags=33%, list=34%, signal=22%	PSMD8/UBC/PSMD12/PSMD13/PSMB8/PSMA2
REACTOME_MYOGENESIS	REACTOME_MYOGENESIS	10	0.308679	0.646435	0.854991	1	1	407	tags=10%, list=7%, signal=9%	BOC
REACTOME_C_TYPE_LECTIN_RECEPTORS_CLRS	REACTOME_C_TYPE_LECTIN_RECEPTORS_CLRS	42	0.236126	0.642638	0.930403	1	1	1247	tags=19%, list=21%, signal=15%	MUC16/MUC12/FCER1G/RPS6KA5/MUC4/PYCARD/NFATC2/CARD9
REACTOME_DEFECTIVE_INTRINSIC_PATHWAY_FOR_APOPTOSIS	REACTOME_DEFECTIVE_INTRINSIC_PATHWAY_FOR_APOPTOSIS	11	-0.29579	-0.64239	0.856838	1	1	1000	tags=27%, list=17%, signal=23%	CDK5/CDK5R1/CDC25C
REACTOME_REGULATION_OF_TP53_ACTIVITY_THROUGH_ACETYLATION	REACTOME_REGULATION_OF_TP53_ACTIVITY_THROUGH_ACETYLATION	15	-0.27785	-0.64224	0.876858	1	1	2785	tags=73%, list=46%, signal=40%	MTA2/RBBP4/HDAC1/PIP4K2C/MEAF6/ING2/MBD3/BRD7/PIP4P1/BRD1/AKT3
REACTOME_M_DECAY_DEGRADATION_OF_MATERNAL_MRNAS_BY_MATERNALLY_STORED_FACTORS	REACTOME_M_DECAY_DEGRADATION_OF_MATERNAL_MRNAS_BY_MATERNALLY_STORED_FACTORS	10	-0.29767	-0.64178	0.859873	1	1	4232	tags=100%, list=70%, signal=30%	CNOT2/CNOT8/EIF4B/EIF4E/CNOT10/CNOT7/PABPC1/CNOT11/EIF4A3
REACTOME_TP53_REGULATES_TRANSCRIPTION_OF_ADDITIONAL_CELL_CYCLE_GENES_WHOSE_EXACT_ROLE_IN_THE_P53_PATHWAY_REMAIN_UNCERTAIN	REACTOME_TP53_REGULATES_TRANSCRIPTION_OF_ADDITIONAL_CELL_CYCLE_GENES_WHOSE_EXACT_ROLE_IN_THE_P53_PATHWAY_REMAIN_UNCERTAIN	10	-0.29767	-0.64178	0.859873	1	1	4232	tags=100%, list=70%, signal=30%	CNOT2/CENPJ/CNOT8/CNOT10/CNOT7/PLK3/CNOT11/PLK2/CDC25C
REACTOME_P75_NTR_RECEPTOR_MEDIATED_SIGNALLING	REACTOME_P75_NTR_RECEPTOR_MEDIATED_SIGNALLING	32	-0.23179	-0.6416	0.919321	1	1	1534	tags=22%, list=25%, signal=16%	SMPD2/CASP3/PRDM4/ARHGEF4/ITGB3BP/TIAM1/ARHGEF6
REACTOME_COPI_MEDIATED_ANTEROGRADE_TRANSPORT	REACTOME_COPI_MEDIATED_ANTEROGRADE_TRANSPORT	38	-0.22667	-0.64103	0.953642	1	1	73	tags=24%, list=1%, signal=24%	COG5/SPTBN5/NAPG/NAPB/COG8/DYNLL1/NSF/TUBB4A/TUBAL3
REACTOME_REGULATION_OF_GLUCOKINASE_BY_GLUCOKINASE_REGULATORY_PROTEIN	REACTOME_REGULATION_OF_GLUCOKINASE_BY_GLUCOKINASE_REGULATORY_PROTEIN	10	0.30589	0.640594	0.86064	1	1	474	tags=10%, list=8%, signal=9%	GCK
REACTOME_ORGANELLE_BIOGENESIS_AND_MAINTENANCE	REACTOME_ORGANELLE_BIOGENESIS_AND_MAINTENANCE	91	-0.19395	-0.63945	0.969907	1	1	1577	tags=29%, list=26%, signal=21%	EXOC1/PPARGC1A/CHCHD6/CEP89/TCTN3/CEP97/DYNLL1/PRKAA2/MEF2C/IFT74/CRTC1/SIRT3/SMARCD3/TMEM11/TUBB4A/GLUD2/IFT52/WDR35/MTERF1/NR1D1/IFT43/TCTN2/CEP152/CAMK4/PRKAR2B/TUBAL3
REACTOME_INTERACTIONS_OF_VPR_WITH_HOST_CELLULAR_PROTEINS	REACTOME_INTERACTIONS_OF_VPR_WITH_HOST_CELLULAR_PROTEINS	11	-0.29439	-0.63937	0.858974	1	1	4252	tags=100%, list=71%, signal=29%	HMGA1/POM121C/NDC1/NUP50/NUP107/NUP205/PSIP1/NUP93/NUP133/NUP54
REACTOME_IRON_UPTAKE_AND_TRANSPORT	REACTOME_IRON_UPTAKE_AND_TRANSPORT	20	-0.25549	-0.63884	0.880851	1	1	611	tags=40%, list=10%, signal=36%	UBC/FTL/ATP6V0A1/ATP6V0E1/CP/ATP6V1H/ATP6V1E2/ATP6V1C2
REACTOME_PCNA_DEPENDENT_LONG_PATCH_BASE_EXCISION_REPAIR	REACTOME_PCNA_DEPENDENT_LONG_PATCH_BASE_EXCISION_REPAIR	11	0.298527	0.636646	0.863296	1	1	750	tags=18%, list=12%, signal=16%	POLD4/RFC3
REACTOME_PINK1_PRKN_MEDIATED_MITOPHAGY	REACTOME_PINK1_PRKN_MEDIATED_MITOPHAGY	12	-0.28781	-0.63627	0.861771	1	1	2346	tags=58%, list=39%, signal=36%	MFN1/SQSTM1/UBE2L3/UBC/TBK1/TOMM22/PRKN
REACTOME_SIGNALING_BY_SCF_KIT	REACTOME_SIGNALING_BY_SCF_KIT	19	0.268847	0.634615	0.876173	1	1	2632	tags=58%, list=44%, signal=33%	FES/GRAP2/JAK2/GRB7/PTPN6/SOCS6/PRKCA/SRC/CHEK1/PTPN11/SH2B3
REACTOME_NUCLEAR_IMPORT_OF_REV_PROTEIN	REACTOME_NUCLEAR_IMPORT_OF_REV_PROTEIN	10	-0.29434	-0.63461	0.864119	1	1	4252	tags=100%, list=71%, signal=29%	RCC1/POM121C/NDC1/NUP50/NUP107/NUP205/NUP93/NUP133/NUP54
REACTOME_SUMOYLATION_OF_SUMOYLATION_PROTEINS	REACTOME_SUMOYLATION_OF_SUMOYLATION_PROTEINS	10	-0.29434	-0.63461	0.864119	1	1	4252	tags=90%, list=71%, signal=26%	POM121C/NDC1/NUP50/PIAS4/NUP107/NUP205/NUP93/NUP133/NUP54
REACTOME_DEADENYLATION_OF_MRNA	REACTOME_DEADENYLATION_OF_MRNA	11	-0.29206	-0.63431	0.863248	1	1	4266	tags=100%, list=71%, signal=29%	CNOT9/CNOT2/CNOT8/EIF4B/EIF4E/CNOT10/CNOT7/PABPC1/CNOT11/EIF4A3
REACTOME_SMAD2_SMAD3_SMAD4_HETEROTRIMER_REGULATES_TRANSCRIPTION	REACTOME_SMAD2_SMAD3_SMAD4_HETEROTRIMER_REGULATES_TRANSCRIPTION	11	0.296888	0.633149	0.867041	1	1	4236	tags=100%, list=70%, signal=30%	SERPINE1/CDKN2B/MEN1/TFDP1/SMAD3/SMAD4/CDK9/HDAC1/UBC/CCNC/SMAD2
REACTOME_SPHINGOLIPID_METABOLISM	REACTOME_SPHINGOLIPID_METABOLISM	46	-0.21338	-0.63295	0.943844	1	1	47	tags=22%, list=1%, signal=22%	SMPD2/SPTLC3/ORMDL1/GALC/GAL3ST1/SPNS2/FUT1/ST8SIA5/GLB1L2/ST6GALNAC6
REACTOME_INFECTIOUS_DISEASE	REACTOME_INFECTIOUS_DISEASE	310	-0.16469	-0.63293	1	1	1	349	tags=3%, list=6%, signal=3%	IL1A/PSMA2/PRKAR2B/TLR6/CYSLTR2/GPC5/TUBAL3/CD3G/SH3GL3/FCGR2A
REACTOME_VIRAL_INFECTION_PATHWAYS	REACTOME_VIRAL_INFECTION_PATHWAYS	247	0.179458	0.632051	1	1	1	679	tags=6%, list=11%, signal=6%	GTF2H4/KPNA7/MGAT4C/DYNC1I1/ST3GAL3/IFNAR2/ZDHHC11/HERC5/BST2/VPS33B/GPS2/TLR4/ST3GAL4/ANO7/VPS37D/IRAK2
REACTOME_SELECTIVE_AUTOPHAGY	REACTOME_SELECTIVE_AUTOPHAGY	40	-0.22034	-0.63098	0.962222	1	1	73	tags=20%, list=1%, signal=20%	PEX5/DYNLL1/PRKAA2/TOMM22/USP30/PRKN/TUBB4A/TUBAL3
REACTOME_E3_UBIQUITIN_LIGASES_UBIQUITINATE_TARGET_PROTEINS	REACTOME_E3_UBIQUITIN_LIGASES_UBIQUITINATE_TARGET_PROTEINS	19	-0.25446	-0.63	0.908316	1	1	4494	tags=47%, list=75%, signal=12%	DERL1/UBE2L3/BCL10/UBC/PEX12/PEX5/PCNA/UBE2D1/RAD18
REACTOME_METABOLISM_OF_FAT_SOLUBLE_VITAMINS	REACTOME_METABOLISM_OF_FAT_SOLUBLE_VITAMINS	23	-0.24558	-0.62993	0.905908	1	1	1336	tags=26%, list=22%, signal=20%	GPC4/APOM/GPC2/LRAT/AKR1B10/GPC5
REACTOME_CLEC7A_DECTIN_1_SIGNALING	REACTOME_CLEC7A_DECTIN_1_SIGNALING	32	-0.22717	-0.62883	0.934183	1	1	2258	tags=38%, list=38%, signal=24%	FBXW11/TAB2/PSMD8/BCL10/UBC/PSMD12/PSMD13/PPP3R1/PSMB8/UBE2D1/NFATC1/PSMA2
REACTOME_ACTIVATION_OF_THE_MRNA_UPON_BINDING_OF_THE_CAP_BINDING_COMPLEX_AND_EIFS_AND_SUBSEQUENT_BINDING_TO_43S	REACTOME_ACTIVATION_OF_THE_MRNA_UPON_BINDING_OF_THE_CAP_BINDING_COMPLEX_AND_EIFS_AND_SUBSEQUENT_BINDING_TO_43S	11	0.294163	0.627338	0.874532	1	1	424	tags=9%, list=7%, signal=8%	EIF3C
REACTOME_DAG_AND_IP3_SIGNALING	REACTOME_DAG_AND_IP3_SIGNALING	13	0.286217	0.627062	0.883019	1	1	761	tags=15%, list=13%, signal=13%	CAMK2B/ADCY9
REACTOME_REGULATION_OF_PTEN_STABILITY_AND_ACTIVITY	REACTOME_REGULATION_OF_PTEN_STABILITY_AND_ACTIVITY	20	-0.24983	-0.62467	0.893617	1	1	2061	tags=35%, list=34%, signal=23%	PSMD8/UBC/PSMD12/PSMD13/AKT3/PSMB8/PSMA2
REACTOME_TBC_RABGAPS	REACTOME_TBC_RABGAPS	17	-0.26187	-0.62331	0.915584	1	1	4449	tags=100%, list=74%, signal=26%	TBC1D10B/TBC1D10A/TBC1D13/ULK1/OPTN/RAB5B/RAB8B/RAB5A/RAB33B/RAB11B/RAB7A/RAB11A/TBC1D20/TBC1D15/TBC1D7/RAB4A
REACTOME_SIGNALING_BY_BRAF_AND_RAF1_FUSIONS	REACTOME_SIGNALING_BY_BRAF_AND_RAF1_FUSIONS	21	0.26075	0.619257	0.913371	1	1	175	tags=5%, list=3%, signal=5%	CAMK2B
REACTOME_DOWNSTREAM_SIGNALING_EVENTS_OF_B_CELL_RECEPTOR_BCR	REACTOME_DOWNSTREAM_SIGNALING_EVENTS_OF_B_CELL_RECEPTOR_BCR	27	-0.23185	-0.61802	0.919214	1	1	391	tags=33%, list=6%, signal=31%	PSMD8/BCL10/UBC/PSMD12/PSMD13/PPP3R1/PSMB8/NFATC1/PSMA2
REACTOME_REGULATION_OF_LIPID_METABOLISM_BY_PPARALPHA	REACTOME_REGULATION_OF_LIPID_METABOLISM_BY_PPARALPHA	43	-0.2114	-0.61579	0.958057	1	1	1901	tags=51%, list=32%, signal=35%	SIN3B/HMGCS1/CCNC/FHL2/ACSL1/NFYB/PPARGC1A/RORA/NR1H2/FABP1/MED27/MED9/MED19/AHR/CPT2/SMARCD3/HMGCS2/MED26/NR1D1/GRHL1/G0S2/ABCB4
REACTOME_ER_TO_GOLGI_ANTEROGRADE_TRANSPORT	REACTOME_ER_TO_GOLGI_ANTEROGRADE_TRANSPORT	61	-0.20034	-0.61373	0.972603	1	1	171	tags=8%, list=3%, signal=8%	CTSC/TUBB4A/SEC31B/F8/TUBAL3
REACTOME_SYNTHESIS_OF_BILE_ACIDS_AND_BILE_SALTS	REACTOME_SYNTHESIS_OF_BILE_ACIDS_AND_BILE_SALTS	13	0.28001	0.613464	0.892453	1	1	526	tags=15%, list=9%, signal=14%	HSD3B7/BAAT
REACTOME_DISEASES_OF_DNA_REPAIR	REACTOME_DISEASES_OF_DNA_REPAIR	24	0.249948	0.613403	0.915129	1	1	1181	tags=25%, list=20%, signal=20%	NEIL1/NTHL1/KAT5/RFC3/EXO1/DNA2
REACTOME_RHOH_GTPASE_CYCLE	REACTOME_RHOH_GTPASE_CYCLE	14	0.27689	0.613112	0.89225	1	1	4357	tags=100%, list=72%, signal=28%	SLC4A7/VANGL1/MTR/UACA/ARHGDIA/OSBPL11/PAK2/SLC1A5/TFRC/VAMP3/RAB7A/NSFL1C/DBT/STOM
REACTOME_RHOV_GTPASE_CYCLE	REACTOME_RHOV_GTPASE_CYCLE	12	-0.27696	-0.61229	0.88121	1	1	4357	tags=100%, list=72%, signal=28%	EPHA2/SH3RF1/GIT1/WDR6/PAK2/TPM4/MAP3K11/ZNF512B/NCK1/CEP97/CDC42
REACTOME_RESOLUTION_OF_AP_SITES_VIA_THE_MULTIPLE_NUCLEOTIDE_PATCH_REPLACEMENT_PATHWAY	REACTOME_RESOLUTION_OF_AP_SITES_VIA_THE_MULTIPLE_NUCLEOTIDE_PATCH_REPLACEMENT_PATHWAY	13	0.278736	0.610672	0.89434	1	1	750	tags=15%, list=12%, signal=13%	POLD4/RFC3
REACTOME_GAMMA_CARBOXYLATION_HYPUSINYLATION_HYDROXYLATION_AND_ARYLSULFATASE_ACTIVATION	REACTOME_GAMMA_CARBOXYLATION_HYPUSINYLATION_HYDROXYLATION_AND_ARYLSULFATASE_ACTIVATION	28	0.238739	0.606523	0.922936	1	1	459	tags=7%, list=8%, signal=7%	DHPS/DPH6
REACTOME_MITOPHAGY	REACTOME_MITOPHAGY	16	-0.2583	-0.60585	0.909871	1	1	3767	tags=94%, list=63%, signal=35%	ULK1/OPTN/CSNK2A2/TOMM70/SRC/PGAM5/ATG5/UBE2N/MFN1/SQSTM1/UBE2L3/UBC/TBK1/TOMM22/PRKN
REACTOME_INTERACTIONS_OF_REV_WITH_HOST_CELLULAR_PROTEINS	REACTOME_INTERACTIONS_OF_REV_WITH_HOST_CELLULAR_PROTEINS	11	-0.27625	-0.59997	0.897436	1	1	4361	tags=100%, list=72%, signal=28%	SEH1L/RCC1/POM121C/NDC1/NUP50/NUP107/NUP205/NUP93/NUP133/NUP54
REACTOME_CA2_PATHWAY	REACTOME_CA2_PATHWAY	20	-0.23988	-0.5998	0.917021	1	1	1924	tags=40%, list=32%, signal=27%	GNG7/GNB5/FZD6/PRKG2/PPP3R1/PDE6A/LEF1/NFATC1
REACTOME_RHOU_GTPASE_CYCLE	REACTOME_RHOU_GTPASE_CYCLE	12	-0.2703	-0.59755	0.896328	1	1	311	tags=17%, list=5%, signal=16%	CDC42/ARHGEF6
REACTOME_NEGATIVE_REGULATORS_OF_DDX58_IFIH1_SIGNALING	REACTOME_NEGATIVE_REGULATORS_OF_DDX58_IFIH1_SIGNALING	16	0.261849	0.597349	0.916045	1	1	595	tags=12%, list=10%, signal=11%	HERC5/RNF125
REACTOME_AQUAPORIN_MEDIATED_TRANSPORT	REACTOME_AQUAPORIN_MEDIATED_TRANSPORT	15	-0.25719	-0.59449	0.915074	1	1	451	tags=13%, list=7%, signal=12%	AQP11/PRKAR2B
REACTOME_INTERLEUKIN_1_FAMILY_SIGNALING	REACTOME_INTERLEUKIN_1_FAMILY_SIGNALING	49	-0.20109	-0.59312	0.96868	1	1	361	tags=37%, list=6%, signal=35%	FBXW11/TAB2/SQSTM1/PSMD8/UBC/PSMD12/NLRX1/PSMD13/MAP2K1/TBK1/IL1R2/NLRC5/LRRC14/PSMB8/TIFA/MAP3K8/IL1A/PSMA2
REACTOME_ASSOCIATION_OF_TRIC_CCT_WITH_TARGET_PROTEINS_DURING_BIOSYNTHESIS	REACTOME_ASSOCIATION_OF_TRIC_CCT_WITH_TARGET_PROTEINS_DURING_BIOSYNTHESIS	12	-0.26803	-0.59253	0.898488	1	1	315	tags=17%, list=5%, signal=16%	CCNE1/FBXO4
REACTOME_OXIDATIVE_STRESS_INDUCED_SENESCENCE	REACTOME_OXIDATIVE_STRESS_INDUCED_SENESCENCE	15	0.262614	0.591995	0.911488	1	1	4443	tags=100%, list=74%, signal=26%	E2F1/CBX4/CDKN2B/TFDP1/MAPKAPK3/FOS/MAPKAPK2/BMI1/RBBP4/RNF2/MAP2K3/JUN/UBC/EED/MDM2
REACTOME_CHONDROITIN_SULFATE_DERMATAN_SULFATE_METABOLISM	REACTOME_CHONDROITIN_SULFATE_DERMATAN_SULFATE_METABOLISM	19	-0.23887	-0.5914	0.925373	1	1	1569	tags=32%, list=26%, signal=23%	CHPF2/CHSY3/GPC4/GPC2/DSEL/GPC5
REACTOME_RHO_GTPASE_CYCLE	REACTOME_RHO_GTPASE_CYCLE	161	-0.16786	-0.59088	1	1	1	1033	tags=13%, list=17%, signal=11%	SH3BP1/TAOK3/ARHGEF4/PIK3R3/MUC13/ARHGAP20/DEF6/ARHGAP4/RHPN1/RAC2/FMNL3/ACTC1/CCDC187/PLEKHG4B/TIAM1/ARHGAP22/UBXN11/ARHGEF6/ARHGAP6/FILIP1/ARHGAP9
REACTOME_RHOD_GTPASE_CYCLE	REACTOME_RHOD_GTPASE_CYCLE	19	-0.23821	-0.58977	0.925373	1	1	181	tags=26%, list=3%, signal=26%	LBR/TOR1AIP1/ARHGAP39/ARHGAP32/FILIP1
REACTOME_RND2_GTPASE_CYCLE	REACTOME_RND2_GTPASE_CYCLE	16	-0.25103	-0.58879	0.924893	1	1	1241	tags=19%, list=21%, signal=15%	NISCH/MUC13/UBXN11
REACTOME_GLUTATHIONE_CONJUGATION	REACTOME_GLUTATHIONE_CONJUGATION	11	0.275526	0.587591	0.891386	1	1	1353	tags=36%, list=22%, signal=28%	CHAC2/GSTM4/GSTO2/OPLAH
REACTOME_RAB_REGULATION_OF_TRAFFICKING	REACTOME_RAB_REGULATION_OF_TRAFFICKING	51	0.205752	0.586327	0.969091	1	1	1878	tags=27%, list=31%, signal=19%	RAB39A/RAB9B/RAB13/RAB3IL1/TRAPPC6A/SBF1/RAB32/DENND1B/GGA3/TBC1D10B/TBC1D10A/DENND1C/ALS2CL/TBC1D13
REACTOME_HCMV_INFECTION	REACTOME_HCMV_INFECTION	41	-0.20199	-0.58615	0.978118	1	1	73	tags=34%, list=1%, signal=34%	DAXX/CHMP4C/CHMP3/MVB12A/CHMP4B/NUP93/NUP133/EED/CHMP2B/UBAP1/NUP54/DYNLL1/TUBB4A/TUBAL3
REACTOME_MITOCHONDRIAL_TRANSLATION	REACTOME_MITOCHONDRIAL_TRANSLATION	36	0.220292	0.581175	0.95122	1	1	1789	tags=28%, list=30%, signal=20%	MRPL38/MRPL23/MRPS18C/MRPS11/MRPS26/MRPS34/MRPL39/GADD45GIP1/MRPL27/MRPS27
REACTOME_LYSOSOME_VESICLE_BIOGENESIS	REACTOME_LYSOSOME_VESICLE_BIOGENESIS	17	0.250159	0.578893	0.914815	1	1	249	tags=6%, list=4%, signal=6%	CLVS1
REACTOME_KEAP1_NFE2L2_PATHWAY	REACTOME_KEAP1_NFE2L2_PATHWAY	37	-0.20645	-0.57844	0.977974	1	1	1254	tags=19%, list=21%, signal=15%	AKT3/PRKAA2/ABCF2/PSMB8/NOTCH1/SESN1/PSMA2
REACTOME_MAPK6_MAPK4_SIGNALING	REACTOME_MAPK6_MAPK4_SIGNALING	26	0.231109	0.57831	0.93956	1	1	670	tags=12%, list=11%, signal=10%	RAG1/MMP2/CDK1
REACTOME_HOMOLOGOUS_DNA_PAIRING_AND_STRAND_EXCHANGE	REACTOME_HOMOLOGOUS_DNA_PAIRING_AND_STRAND_EXCHANGE	20	-0.23116	-0.57801	0.92766	1	1	1403	tags=35%, list=23%, signal=27%	MRE11/RPA2/BARD1/RAD51C/RAD51AP1/XRCC2/ATRIP
REACTOME_SIGNALING_BY_NOTCH1_PEST_DOMAIN_MUTANTS_IN_CANCER	REACTOME_SIGNALING_BY_NOTCH1_PEST_DOMAIN_MUTANTS_IN_CANCER	22	-0.22742	-0.57779	0.922581	1	1	161	tags=9%, list=3%, signal=9%	NOTCH1/HEYL
REACTOME_EXTRA_NUCLEAR_ESTROGEN_SIGNALING	REACTOME_EXTRA_NUCLEAR_ESTROGEN_SIGNALING	19	0.243406	0.574563	0.915572	1	1	423	tags=11%, list=7%, signal=10%	BTC/MMP2
REACTOME_CONSTITUTIVE_SIGNALING_BY_AKT1_E17K_IN_CANCER	REACTOME_CONSTITUTIVE_SIGNALING_BY_AKT1_E17K_IN_CANCER	10	0.273168	0.572068	0.911488	1	1	2197	tags=50%, list=36%, signal=32%	BAD/FOXO4/PRR5/AKT1/AKT2
REACTOME_HCMV_LATE_EVENTS	REACTOME_HCMV_LATE_EVENTS	23	0.233283	0.571502	0.93945	1	1	4621	tags=100%, list=77%, signal=23%	VPS37D/CHMP6/CHMP2A/SEH1L/MVB12B/POM121C/NDC1/NUP50/CHMP1A/HNRNPK/NUP107/NUP205/VPS4A/TSG101/CHMP4C/CHMP3/MVB12A/CHMP4B/NUP93/NUP133/CHMP2B/UBAP1/NUP54
REACTOME_HDR_THROUGH_SINGLE_STRAND_ANNEALING_SSA	REACTOME_HDR_THROUGH_SINGLE_STRAND_ANNEALING_SSA	16	0.250033	0.570395	0.932836	1	1	1181	tags=31%, list=20%, signal=25%	KAT5/RFC3/ERCC1/EXO1/DNA2
REACTOME_ENDOSOMAL_SORTING_COMPLEX_REQUIRED_FOR_TRANSPORT_ESCRT	REACTOME_ENDOSOMAL_SORTING_COMPLEX_REQUIRED_FOR_TRANSPORT_ESCRT	16	0.2495	0.569179	0.932836	1	1	4522	tags=100%, list=75%, signal=25%	VPS37D/CHMP6/CHMP2A/MVB12B/VPS4B/VPS4A/TSG101/HGS/CHMP4C/CHMP3/UBC/MVB12A/CHMP4B/VTA1/CHMP2B/UBAP1
REACTOME_TRANSCRIPTIONAL_REGULATION_BY_E2F6	REACTOME_TRANSCRIPTIONAL_REGULATION_BY_E2F6	12	-0.2574	-0.56905	0.920086	1	1	1787	tags=75%, list=30%, signal=53%	BMI1/RBBP4/RNF2/PCGF2/CDC7/EED/L3MBTL2/E2F6/YAF2
REACTOME_POTENTIAL_THERAPEUTICS_FOR_SARS	REACTOME_POTENTIAL_THERAPEUTICS_FOR_SARS	34	0.217173	0.567249	0.955638	1	1	4720	tags=100%, list=78%, signal=22%	IFNAR2/STAT2/SAP30/JAK2/REST/FNTB/IL1R1/CRBN/RCOR1/MTA1/IMPDH2/FKBP4/AP2A1/FNTA/HMG20B/MTA2/RBBP4/ARID4A/CUL3/HDAC1/SUDS3/SIGMAR1/PTGES3/ARID4B/NCK1/SAP30L/MBD3/IFNGR2/TBK1/JAK1/IMPDH1/BLNK/AP2S1/RIPK1
REACTOME_BUDDING_AND_MATURATION_OF_HIV_VIRION	REACTOME_BUDDING_AND_MATURATION_OF_HIV_VIRION	15	0.249459	0.562339	0.932203	1	1	4522	tags=100%, list=75%, signal=25%	VPS37D/CHMP6/CHMP2A/MVB12B/VPS4B/VPS4A/TSG101/CHMP4C/CHMP3/UBC/MVB12A/CHMP4B/VTA1/CHMP2B/UBAP1
REACTOME_LATE_ENDOSOMAL_MICROAUTOPHAGY	REACTOME_LATE_ENDOSOMAL_MICROAUTOPHAGY	15	0.249459	0.562339	0.932203	1	1	4522	tags=100%, list=75%, signal=25%	VPS37D/CHMP6/CHMP2A/HDAC6/MVB12B/VIM/PLIN3/TSG101/CHMP4C/CHMP3/UBC/MVB12A/CHMP4B/CHMP2B/UBAP1
REACTOME_SENESCENCE_ASSOCIATED_SECRETORY_PHENOTYPE_SASP	REACTOME_SENESCENCE_ASSOCIATED_SECRETORY_PHENOTYPE_SASP	13	-0.24822	-0.56016	0.925847	1	1	1055	tags=23%, list=18%, signal=19%	UBE2D1/ANAPC10/IL1A
REACTOME_ACTIVATION_OF_BH3_ONLY_PROTEINS	REACTOME_ACTIVATION_OF_BH3_ONLY_PROTEINS	11	0.261825	0.558374	0.925094	1	1	794	tags=18%, list=13%, signal=16%	E2F1/BAD
REACTOME_INTERFERON_ALPHA_BETA_SIGNALING	REACTOME_INTERFERON_ALPHA_BETA_SIGNALING	30	0.217809	0.556111	0.953184	1	1	1035	tags=20%, list=17%, signal=17%	IFNAR2/IRF8/BST2/IFI27/IFITM2/STAT2
REACTOME_SARS_COV_INFECTIONS	REACTOME_SARS_COV_INFECTIONS	134	0.16911	0.555975	0.998322	1	1	1404	tags=18%, list=23%, signal=14%	MGAT4C/ST3GAL3/IFNAR2/ZDHHC11/BST2/VPS33B/ST3GAL4/ANO7/IRAK2/ANO2/PYCARD/PARP16/STAT2/SAP30/TKFC/JAK2/REST/SERPINE1/CHMP6/MOGS/HAVCR1/MGAT5/FNTB/IKBKE
REACTOME_RAC1_GTPASE_CYCLE	REACTOME_RAC1_GTPASE_CYCLE	67	-0.17787	-0.55479	0.988479	1	1	1033	tags=16%, list=17%, signal=14%	SH3BP1/TAOK3/ARHGEF4/PIK3R3/ARHGAP20/DEF6/ARHGAP4/TIAM1/ARHGAP22/ARHGEF6/ARHGAP9
REACTOME_RECRUITMENT_OF_MITOTIC_CENTROSOME_PROTEINS_AND_COMPLEXES	REACTOME_RECRUITMENT_OF_MITOTIC_CENTROSOME_PROTEINS_AND_COMPLEXES	30	0.216458	0.552661	0.958801	1	1	975	tags=17%, list=16%, signal=14%	CDK11A/CNTRL/CDK1/CEP192/CEP290
REACTOME_DOWNREGULATION_OF_SMAD2_3_SMAD4_TRANSCRIPTIONAL_ACTIVITY	REACTOME_DOWNREGULATION_OF_SMAD2_3_SMAD4_TRANSCRIPTIONAL_ACTIVITY	10	-0.25552	-0.5509	0.938429	1	1	2802	tags=80%, list=47%, signal=43%	SMAD4/PARP1/HDAC1/STAT1/UBC/SMURF2/SMAD2/UBE2D1
REACTOME_SUMOYLATION_OF_CHROMATIN_ORGANIZATION_PROTEINS	REACTOME_SUMOYLATION_OF_CHROMATIN_ORGANIZATION_PROTEINS	19	0.233128	0.5503	0.938086	1	1	4621	tags=100%, list=77%, signal=23%	CBX4/ZBED1/HDAC4/SEH1L/POM121C/NDC1/NUP50/NUP107/NUP205/BMI1/RNF2/HDAC1/PCGF2/PIAS1/NUP93/NUP133/SUMO3/L3MBTL2/NUP54
REACTOME_RHOG_GTPASE_CYCLE	REACTOME_RHOG_GTPASE_CYCLE	30	0.213856	0.54602	0.960674	1	1	4739	tags=100%, list=79%, signal=21%	MCAM/KALRN/DIAPH3/VANGL1/EMD/LETM1/ARHGAP1/DOCK1/EPHA2/ELMO2/ARHGDIA/PLD1/ARFGAP3/CDC42EP1/PAK2/PLEKHG3/KTN1/TFRC/CYFIP1/LEMD3/RHOG/VAMP3/ARHGEF16/RAB7A/MAP3K11/LBR/HSPE1/ARHGAP39/ARHGAP32/CDC42
REACTOME_ASYMMETRIC_LOCALIZATION_OF_PCP_PROTEINS	REACTOME_ASYMMETRIC_LOCALIZATION_OF_PCP_PROTEINS	20	-0.21811	-0.54536	0.946809	1	1	2061	tags=40%, list=34%, signal=26%	PSMD8/UBC/PSMD12/PSMD13/SMURF2/PSMB8/PRICKLE1/PSMA2
REACTOME_SARS_COV_2_INFECTION	REACTOME_SARS_COV_2_INFECTION	95	0.176641	0.544653	0.992995	1	1	1310	tags=17%, list=22%, signal=13%	MGAT4C/ST3GAL3/IFNAR2/ZDHHC11/VPS33B/ST3GAL4/ANO7/IRAK2/ANO2/PARP16/STAT2/TKFC/CHMP6/MOGS/HAVCR1/MGAT5
REACTOME_TRANSPORT_TO_THE_GOLGI_AND_SUBSEQUENT_MODIFICATION	REACTOME_TRANSPORT_TO_THE_GOLGI_AND_SUBSEQUENT_MODIFICATION	70	0.182961	0.54463	0.989474	1	1	799	tags=11%, list=13%, signal=10%	MGAT4C/DYNC1I1/CNIH3/STX17/ST3GAL4/CNIH2/TUBB1/INS
REACTOME_MITOCHONDRIAL_PROTEIN_DEGRADATION	REACTOME_MITOCHONDRIAL_PROTEIN_DEGRADATION	26	-0.20637	-0.5441	0.960526	1	1	4784	tags=100%, list=79%, signal=21%	PDHA1/SPG7/ACAD8/OGDH/PDHB/MRPS10/NADK2/NDUFS1/ALDH1B1/APP/ALDH18A1/CLPP/AFG3L2/YME1L1/STARD7/HTRA2/DBT/CLPX/ACADSB/FECH/PMPCA/ACOT2/MRPL32/HMGCS2/OXSM
REACTOME_TOLL_LIKE_RECEPTOR_CASCADES	REACTOME_TOLL_LIKE_RECEPTOR_CASCADES	64	-0.17451	-0.54354	0.988962	1	1	1302	tags=19%, list=22%, signal=15%	RIPK1/NLRC5/MEF2C/LRRC14/UBE2D1/TIFA/UNC93B1/VRK3/CTSV/CTSK/MAP3K8/TLR6
REACTOME_FATTY_ACYL_COA_BIOSYNTHESIS	REACTOME_FATTY_ACYL_COA_BIOSYNTHESIS	18	-0.22354	-0.54035	0.962801	1	1	2074	tags=44%, list=34%, signal=29%	HSD17B12/ELOVL7/ACSL1/PPT1/TECR/HACD1/CBR4/SLC27A2
REACTOME_CELLULAR_RESPONSE_TO_HYPOXIA	REACTOME_CELLULAR_RESPONSE_TO_HYPOXIA	18	-0.22288	-0.53876	0.962801	1	1	1077	tags=39%, list=18%, signal=32%	PSMD8/UBC/PSMD12/PSMD13/PSMB8/UBE2D1/PSMA2
REACTOME_METABOLISM_OF_COFACTORS	REACTOME_METABOLISM_OF_COFACTORS	13	-0.23857	-0.53838	0.944915	1	1	902	tags=23%, list=15%, signal=20%	PRKG2/COQ6/NOS3
REACTOME_UPTAKE_AND_ACTIONS_OF_BACTERIAL_TOXINS	REACTOME_UPTAKE_AND_ACTIONS_OF_BACTERIAL_TOXINS	10	-0.2494	-0.53771	0.944798	1	1	770	tags=60%, list=13%, signal=52%	MAP2K3/ANTXR1/STX1A/MAP2K1/SV2A/VAMP1
REACTOME_SIGNALING_BY_ACTIVIN	REACTOME_SIGNALING_BY_ACTIVIN	10	0.256361	0.536871	0.922787	1	1	1165	tags=30%, list=19%, signal=24%	FOXH1/ACVR1C/INHBB
REACTOME_SIGNALING_BY_WNT_IN_CANCER	REACTOME_SIGNALING_BY_WNT_IN_CANCER	10	0.256073	0.536267	0.922787	1	1	4481	tags=100%, list=74%, signal=26%	FZD4/PPP2R5B/PORCN/CSNK1A1/PPP2R5A/CTNNB1/PPP2R1B/PPP2CB/KREMEN1/FZD6
REACTOME_CELLULAR_RESPONSE_TO_CHEMICAL_STRESS	REACTOME_CELLULAR_RESPONSE_TO_CHEMICAL_STRESS	51	0.187856	0.535329	0.989091	1	1	756	tags=10%, list=13%, signal=9%	NOX4/SRXN1/NCF2/ABCC3/TXNRD2
REACTOME_SARS_COV_2_HOST_INTERACTIONS	REACTOME_SARS_COV_2_HOST_INTERACTIONS	52	0.186997	0.533864	0.98913	1	1	4904	tags=100%, list=81%, signal=19%	IFNAR2/VPS33B/IRAK2/STAT2/TKFC/IKBKE/VPS16/SEH1L/IRAK1/AKT1/PTPN6/AKT2/CRB3/GJA1/RIPK2/POM121C/SNRPF/TOMM70/G3BP2/PTPN11/NDC1/HLA-E/NUP50/SEC23A/IRF3/G3BP1/VPS11/NUP107/NUP205/CHUK/UBE2N/SNRPD1/YWHAQ/TAB2/IRF7/STAT1/PIK3C3/ATG14/UBC/KPNA2/NUP93/NUP133/TBK1/RPS23/JAK1/NUP54/GEMIN8/IFIH1/AKT3/DDX20/VPS41/HLA-F
REACTOME_ORC1_REMOVAL_FROM_CHROMATIN	REACTOME_ORC1_REMOVAL_FROM_CHROMATIN	23	-0.20776	-0.53292	0.958425	1	1	2076	tags=35%, list=34%, signal=23%	ORC4/PSMD8/UBC/PSMD12/PSMD13/MCM7/PSMB8/PSMA2
REACTOME_SWITCHING_OF_ORIGINS_TO_A_POST_REPLICATIVE_STATE	REACTOME_SWITCHING_OF_ORIGINS_TO_A_POST_REPLICATIVE_STATE	28	-0.19698	-0.53162	0.964989	1	1	2076	tags=39%, list=34%, signal=26%	ORC4/PSMD8/UBC/PSMD12/PSMD13/MCM7/CCNE1/PSMB8/UBE2D1/ANAPC10/PSMA2
REACTOME_DEACTIVATION_OF_THE_BETA_CATENIN_TRANSACTIVATING_COMPLEX	REACTOME_DEACTIVATION_OF_THE_BETA_CATENIN_TRANSACTIVATING_COMPLEX	11	-0.24463	-0.5313	0.952991	1	1	4551	tags=100%, list=76%, signal=24%	MEN1/TCF7/AKT1/AKT2/CTNNB1/HDAC1/CBY1/UBC/SOX13/LEF1
REACTOME_RHOBTB_GTPASE_CYCLE	REACTOME_RHOBTB_GTPASE_CYCLE	12	-0.23949	-0.52944	0.956803	1	1	2786	tags=75%, list=46%, signal=40%	CCT6A/COPS2/CUL3/CPSF7/RBMX/RHOBTB1/COPS4/SRRM1/DDX39B
REACTOME_PYRUVATE_METABOLISM	REACTOME_PYRUVATE_METABOLISM	15	-0.22865	-0.52852	0.949045	1	1	1183	tags=20%, list=20%, signal=16%	GLO1/PDK2/PDK4
REACTOME_SUMOYLATION_OF_RNA_BINDING_PROTEINS	REACTOME_SUMOYLATION_OF_RNA_BINDING_PROTEINS	15	0.232973	0.525175	0.956685	1	1	4621	tags=100%, list=77%, signal=23%	CBX4/SEH1L/POM121C/NDC1/NUP50/HNRNPK/NUP107/NUP205/BMI1/RNF2/NOP58/PCGF2/NUP93/NUP133/NUP54
REACTOME_TAK1_DEPENDENT_IKK_AND_NF_KAPPA_B_ACTIVATION	REACTOME_TAK1_DEPENDENT_IKK_AND_NF_KAPPA_B_ACTIVATION	18	0.22087	0.520727	0.957798	1	1	679	tags=11%, list=11%, signal=10%	ALPK1/IRAK2
REACTOME_DNA_REPLICATION_PRE_INITIATION	REACTOME_DNA_REPLICATION_PRE_INITIATION	30	0.203711	0.520117	0.97191	1	1	334	tags=7%, list=6%, signal=6%	MCM10/ANAPC15
REACTOME_HDMS_DEMETHYLATE_HISTONES	REACTOME_HDMS_DEMETHYLATE_HISTONES	11	0.241823	0.515716	0.945693	1	1	1670	tags=45%, list=28%, signal=33%	KDM7A/PHF8/KDM5D/KDM2A/JMJD6
REACTOME_NUCLEAR_EVENTS_MEDIATED_BY_NFE2L2	REACTOME_NUCLEAR_EVENTS_MEDIATED_BY_NFE2L2	26	-0.19552	-0.51548	0.975877	1	1	2061	tags=38%, list=34%, signal=25%	PSMD8/UBC/PSMD12/PSMD13/ABCC1/PRKAA2/ABCF2/PSMB8/NOTCH1/PSMA2
REACTOME_GOLGI_ASSOCIATED_VESICLE_BIOGENESIS	REACTOME_GOLGI_ASSOCIATED_VESICLE_BIOGENESIS	24	-0.19863	-0.51456	0.976087	1	1	4830	tags=96%, list=80%, signal=19%	AP1S3/SNX9/VAMP8/ARRB1/SNX2/VAMP2/BLOC1S3/BLOC1S6/AP1M2/ACBD3/TFRC/AP4E1/TBC1D8B/NAPA/FTH1/DNAJC6/AP3B1/FTL/SNAPIN/HIP1R/TPD52/AP1S2/DTNBP1
REACTOME_TNFR2_NON_CANONICAL_NF_KB_PATHWAY	REACTOME_TNFR2_NON_CANONICAL_NF_KB_PATHWAY	27	0.20453	0.513093	0.977941	1	1	813	tags=11%, list=14%, signal=10%	LTB/TNFSF13/EDAR
REACTOME_S_PHASE	REACTOME_S_PHASE	63	0.17359	0.510311	0.994633	1	1	938	tags=14%, list=16%, signal=12%	ANAPC15/E2F1/CDC25A/POLD4/RFC3/GINS2/CDC6/GINS4/LIN54
REACTOME_SYNTHESIS_OF_VERY_LONG_CHAIN_FATTY_ACYL_COAS	REACTOME_SYNTHESIS_OF_VERY_LONG_CHAIN_FATTY_ACYL_COAS	12	0.236019	0.509628	0.948052	1	1	4602	tags=100%, list=76%, signal=24%	SLC27A3/ELOVL1/ELOVL2/ELOVL6/HACD3/ELOVL5/ACSL4/HSD17B12/ELOVL7/ACSL1/TECR/HACD1
REACTOME_INTRAFLAGELLAR_TRANSPORT	REACTOME_INTRAFLAGELLAR_TRANSPORT	20	-0.2033	-0.50834	0.955319	1	1	1361	tags=30%, list=23%, signal=23%	DYNLL1/IFT74/TUBB4A/IFT52/WDR35/IFT43
REACTOME_TOLL_LIKE_RECEPTOR_TLR1_TLR2_CASCADE	REACTOME_TOLL_LIKE_RECEPTOR_TLR1_TLR2_CASCADE	44	-0.17344	-0.50756	0.984848	1	1	1280	tags=16%, list=21%, signal=13%	NLRC5/MEF2C/LRRC14/TIFA/VRK3/MAP3K8/TLR6
REACTOME_CYCLIN_A_B1_B2_ASSOCIATED_EVENTS_DURING_G2_M_TRANSITION	REACTOME_CYCLIN_A_B1_B2_ASSOCIATED_EVENTS_DURING_G2_M_TRANSITION	12	0.234437	0.506213	0.948052	1	1	677	tags=17%, list=11%, signal=15%	CDK1/CDC25A
REACTOME_CYCLIN_D_ASSOCIATED_EVENTS_IN_G1	REACTOME_CYCLIN_D_ASSOCIATED_EVENTS_IN_G1	20	0.213667	0.505517	0.971805	1	1	4738	tags=100%, list=79%, signal=21%	E2F1/JAK2/CDKN2B/TFDP1/MNAT1/CDK7/SKP2/SRC/CCND2/RB1/CUL1/PPP2R3B/PPP2R1B/CCND1/CCNH/PPP2CB/UBC/CKS1B/PPP2R2A/CCNE1
REACTOME_NUCLEAR_PORE_COMPLEX_NPC_DISASSEMBLY	REACTOME_NUCLEAR_PORE_COMPLEX_NPC_DISASSEMBLY	12	0.232856	0.502799	0.949907	1	1	4621	tags=100%, list=77%, signal=23%	CDK1/SEH1L/CCNB1/NEK9/POM121C/NDC1/NUP50/NUP107/NUP205/NUP93/NUP133/NUP54
REACTOME_ONCOGENIC_MAPK_SIGNALING	REACTOME_ONCOGENIC_MAPK_SIGNALING	32	0.194697	0.502201	0.979284	1	1	175	tags=3%, list=3%, signal=3%	CAMK2B
REACTOME_CILIUM_ASSEMBLY	REACTOME_CILIUM_ASSEMBLY	66	-0.16015	-0.49949	0.993274	1	1	893	tags=12%, list=15%, signal=10%	TUBB4A/IFT52/WDR35/IFT43/TCTN2/CEP152/PRKAR2B/TUBAL3
REACTOME_RRNA_PROCESSING	REACTOME_RRNA_PROCESSING	55	-0.16372	-0.49861	0.99115	1	1	2220	tags=40%, list=37%, signal=25%	PNO1/RPL22L1/GNL3/WDR75/UTP3/NOL11/NIP7/TRMT10C/NOP14/RIOK1/EXOSC3/UTP11/EBNA1BP2/RPS23/RPP30/RPL14/UTP15/UTP4/RPL39L/RRP9/RPL26L1/NOL12
REACTOME_SARS_COV_2_ACTIVATES_MODULATES_INNATE_AND_ADAPTIVE_IMMUNE_RESPONSES	REACTOME_SARS_COV_2_ACTIVATES_MODULATES_INNATE_AND_ADAPTIVE_IMMUNE_RESPONSES	37	0.186528	0.498605	0.974453	1	1	4904	tags=100%, list=81%, signal=19%	IFNAR2/IRAK2/STAT2/TKFC/IKBKE/SEH1L/IRAK1/PTPN6/RIPK2/POM121C/TOMM70/G3BP2/PTPN11/NDC1/HLA-E/NUP50/SEC23A/IRF3/G3BP1/NUP107/NUP205/CHUK/UBE2N/TAB2/IRF7/STAT1/PIK3C3/ATG14/UBC/KPNA2/NUP93/NUP133/TBK1/JAK1/NUP54/IFIH1/HLA-F
REACTOME_TRANSPORT_OF_MATURE_TRANSCRIPT_TO_CYTOPLASM	REACTOME_TRANSPORT_OF_MATURE_TRANSCRIPT_TO_CYTOPLASM	29	0.195126	0.498019	0.979705	1	1	4851	tags=100%, list=81%, signal=20%	THOC3/THOC6/SEH1L/NCBP1/POM121C/POLDIP3/NDC1/SYMPK/NUP50/EIF4E/WDR33/NUP107/NUP205/THOC1/RBM8A/FIP1L1/CHTOP/DHX38/NUP93/NXF1/NUP133/CDC40/EIF4A3/SRSF6/NUP54/THOC7/SRRM1/DDX39B/CPSF4
REACTOME_SYNTHESIS_OF_DNA	REACTOME_SYNTHESIS_OF_DNA	42	0.182909	0.497803	0.987179	1	1	901	tags=14%, list=15%, signal=12%	ANAPC15/POLD4/RFC3/GINS2/CDC6/GINS4
REACTOME_CTLA4_INHIBITORY_SIGNALING	REACTOME_CTLA4_INHIBITORY_SIGNALING	10	-0.23012	-0.49613	0.961783	1	1	4638	tags=100%, list=77%, signal=23%	AKT1/AKT2/SRC/PTPN11/FYN/PPP2R5A/PPP2R1B/PPP2CB/AKT3
REACTOME_DEATH_RECEPTOR_SIGNALING	REACTOME_DEATH_RECEPTOR_SIGNALING	57	-0.16203	-0.49416	0.993243	1	1	1673	tags=25%, list=28%, signal=18%	TBK1/MIB2/SMPD2/CASP10/USP2/CASP3/RIPK1/PRDM4/UBE2D1/SPPL2B/ARHGEF4/ITGB3BP/TIAM1/ARHGEF6
REACTOME_GLYCEROPHOSPHOLIPID_BIOSYNTHESIS	REACTOME_GLYCEROPHOSPHOLIPID_BIOSYNTHESIS	40	-0.17215	-0.49299	0.993333	1	1	1755	tags=30%, list=29%, signal=21%	PCTP/CEPT1/DDHD2/PLBD1/SLC44A5/CPNE1/AGK/PLA2G10/PGS1/MFSD2A/PCYT1B/PLA2G4A
REACTOME_PROCESSING_OF_CAPPED_INTRON_CONTAINING_PRE_MRNA	REACTOME_PROCESSING_OF_CAPPED_INTRON_CONTAINING_PRE_MRNA	94	-0.14828	-0.49152	1	1	1	4699	tags=98%, list=78%, signal=22%	ZMAT5/ISY1/LENG1/RBM25/GPKOW/YJU2/HNRNPR/LSM8/PDCD7/SEH1L/CWF19L2/METTL14/HNRNPD/NCBP1/SRSF12/WBP4/SMNDC1/HNRNPU/DHX35/DDX46/POM121C/SNRPF/SNRNP48/POLDIP3/PCF11/NDC1/DDX23/SYMPK/LUC7L3/NUP50/CHERP/SF3A2/SDE2/EIF4E/HNRNPK/WDR33/PPIG/NUP107/NUP205/THOC1/ACIN1/PRCC/WBP11/RBM5/RBM39/PCBP2/POLR2B/DHX9/C9orf78/CSTF2/PRPF40A/GTF2F1/HNRNPA3/RBM8A/SNRPD1/PRPF19/SRSF8/CPSF7/FIP1L1/RBMX/BUD13/CHTOP/DHX38/ME…
REACTOME_RHOC_GTPASE_CYCLE	REACTOME_RHOC_GTPASE_CYCLE	25	0.1977	0.490646	0.975926	1	1	2285	tags=48%, list=38%, signal=30%	CIT/MCAM/CAVIN1/DIAPH3/FLOT1/ARHGEF28/VANGL1/ARHGEF1/MYO9B/ARHGAP1/ABCD3/ARHGDIA
REACTOME_REGULATION_OF_CHOLESTEROL_BIOSYNTHESIS_BY_SREBP_SREBF	REACTOME_REGULATION_OF_CHOLESTEROL_BIOSYNTHESIS_BY_SREBP_SREBF	15	-0.21166	-0.48923	0.96603	1	1	4750	tags=100%, list=79%, signal=21%	INSIG2/SCAP/LSS/FASN/MVK/SEC23A/ELOVL6/SREBF2/NFYC/MBTPS2/HMGCS1/SC5D/NFYB/SMARCD3
REACTOME_DNA_DOUBLE_STRAND_BREAK_RESPONSE	REACTOME_DNA_DOUBLE_STRAND_BREAK_RESPONSE	16	-0.2075	-0.48669	0.969957	1	1	2351	tags=50%, list=39%, signal=31%	NBN/RNF168/UBC/KPNA2/BABAM1/MRE11/BARD1/BABAM2
REACTOME_N_GLYCAN_TRIMMING_IN_THE_ER_AND_CALNEXIN_CALRETICULIN_CYCLE	REACTOME_N_GLYCAN_TRIMMING_IN_THE_ER_AND_CALNEXIN_CALRETICULIN_CYCLE	13	-0.21475	-0.48463	0.970339	1	1	4731	tags=62%, list=79%, signal=13%	AMFR/RNF139/NGLY1/UGGT2/DERL1/MLEC/UBC/RNF103
REACTOME_TRANSCRIPTIONAL_ACTIVITY_OF_SMAD2_SMAD3_SMAD4_HETEROTRIMER	REACTOME_TRANSCRIPTIONAL_ACTIVITY_OF_SMAD2_SMAD3_SMAD4_HETEROTRIMER	15	-0.20916	-0.48346	0.968153	1	1	4765	tags=100%, list=79%, signal=21%	CDKN2B/MEN1/TFDP1/SMAD3/SMAD4/PARP1/CDK9/HDAC1/STAT1/UBC/SMURF2/CCNC/SMAD2/UBE2D1
REACTOME_RETROGRADE_TRANSPORT_AT_THE_TRANS_GOLGI_NETWORK	REACTOME_RETROGRADE_TRANSPORT_AT_THE_TRANS_GOLGI_NETWORK	24	0.196699	0.482724	0.98524	1	1	2102	tags=38%, list=35%, signal=25%	RAB9B/ARFRP1/NAA38/STX10/VPS52/COG3/USP6NL/RIC1/STX16
REACTOME_SIGNALING_BY_TGF_BETA_RECEPTOR_COMPLEX	REACTOME_SIGNALING_BY_TGF_BETA_RECEPTOR_COMPLEX	27	-0.17999	-0.4798	0.982533	1	1	164	tags=37%, list=3%, signal=36%	STAT1/UBC/STRAP/SMURF2/PPP1CC/CCNC/SMAD2/UBE2D1/TGFB3/ITGA8
REACTOME_TNFR1_INDUCED_NF_KAPPA_B_SIGNALING_PATHWAY	REACTOME_TNFR1_INDUCED_NF_KAPPA_B_SIGNALING_PATHWAY	14	0.21645	0.479282	0.965974	1	1	4720	tags=100%, list=78%, signal=22%	TRAF1/TRADD/OPTN/TNFRSF1A/TRAF2/CYLD/RBCK1/CHUK/TNFAIP3/TAB2/SPATA2/UBC/USP2/RIPK1
REACTOME_TNFR1_INDUCED_PROAPOPTOTIC_SIGNALING	REACTOME_TNFR1_INDUCED_PROAPOPTOTIC_SIGNALING	14	0.21645	0.479282	0.965974	1	1	4720	tags=100%, list=78%, signal=22%	TRADD/FADD/IKBKE/OPTN/TNFRSF1A/TRAF2/CYLD/RBCK1/TNFAIP3/SPATA2/TBK1/MIB2/USP2/RIPK1
REACTOME_SIGNALING_BY_THE_B_CELL_RECEPTOR_BCR	REACTOME_SIGNALING_BY_THE_B_CELL_RECEPTOR_BCR	36	-0.16972	-0.47888	0.985075	1	1	391	tags=36%, list=6%, signal=34%	FBXW11/NCK1/PSMD8/BCL10/UBC/PSMD12/PSMD13/BLNK/PPP3R1/PIK3CD/PSMB8/NFATC1/PSMA2
REACTOME_RECOGNITION_OF_DNA_DAMAGE_BY_PCNA_CONTAINING_REPLICATION_COMPLEX	REACTOME_RECOGNITION_OF_DNA_DAMAGE_BY_PCNA_CONTAINING_REPLICATION_COMPLEX	14	0.215792	0.477825	0.965974	1	1	750	tags=14%, list=12%, signal=13%	POLD4/RFC3
REACTOME_RNA_POLYMERASE_II_TRANSCRIPTION_TERMINATION	REACTOME_RNA_POLYMERASE_II_TRANSCRIPTION_TERMINATION	23	0.194931	0.477545	0.985321	1	1	4851	tags=100%, list=81%, signal=19%	THOC3/THOC6/NCBP1/SNRPF/POLDIP3/PCF11/SYMPK/WDR33/THOC1/CSTF2/RBM8A/CPSF7/FIP1L1/CHTOP/DHX38/CDC40/EIF4A3/SRSF6/THOC7/SRRM1/DDX39B/CSTF1/CPSF4
REACTOME_PEROXISOMAL_PROTEIN_IMPORT	REACTOME_PEROXISOMAL_PROTEIN_IMPORT	25	-0.18167	-0.4759	0.984848	1	1	1573	tags=36%, list=26%, signal=27%	PEX12/PEX5/AMACR/HACL1/ACOT2/UBE2D1/EHHADH/SLC27A2/CROT
REACTOME_NOD1_2_SIGNALING_PATHWAY	REACTOME_NOD1_2_SIGNALING_PATHWAY	12	0.219163	0.473231	0.962894	1	1	1270	tags=25%, list=21%, signal=20%	IRAK2/CARD9/MAPK13
REACTOME_MAP2K_AND_MAPK_ACTIVATION	REACTOME_MAP2K_AND_MAPK_ACTIVATION	11	-0.21788	-0.47319	0.974359	1	1	515	tags=45%, list=9%, signal=42%	ARAF/RAF1/MAP2K1/RAP1A/CNKSR2
REACTOME_TP53_REGULATES_TRANSCRIPTION_OF_CELL_CYCLE_GENES	REACTOME_TP53_REGULATES_TRANSCRIPTION_OF_CELL_CYCLE_GENES	22	-0.18588	-0.47225	0.974194	1	1	1864	tags=36%, list=31%, signal=25%	PLK2/PCBP4/PRMT1/PCNA/CCNE1/ZNF385A/CDC25C/E2F7
REACTOME_SIGNALING_BY_NOTCH1	REACTOME_SIGNALING_BY_NOTCH1	27	-0.17705	-0.47196	0.9869	1	1	161	tags=7%, list=3%, signal=7%	NOTCH1/HEYL
REACTOME_DNA_DAMAGE_TELOMERE_STRESS_INDUCED_SENESCENCE	REACTOME_DNA_DAMAGE_TELOMERE_STRESS_INDUCED_SENESCENCE	13	0.213418	0.467569	0.956604	1	1	4738	tags=100%, list=79%, signal=21%	KAT5/TERF2/HMGA1/TINF2/ACD/LMNB1/RB1/NBN/ASF1A/HIRA/TERF1/MRE11/CCNE1
REACTOME_SELENOAMINO_ACID_METABOLISM	REACTOME_SELENOAMINO_ACID_METABOLISM	16	-0.19903	-0.46683	0.978541	1	1	2145	tags=56%, list=36%, signal=36%	RPL22L1/CTH/PAPSS1/MAT1A/RPS23/RPL14/EEF1E1/RPL39L/RPL26L1
REACTOME_TRANSLATION	REACTOME_TRANSLATION	80	0.153834	0.465416	1	1	1	707	tags=6%, list=12%, signal=6%	SARS2/MRPL38/EIF3C/MRPL23/MRPS18C
REACTOME_ACTIVATION_OF_GENE_EXPRESSION_BY_SREBF_SREBP	REACTOME_ACTIVATION_OF_GENE_EXPRESSION_BY_SREBF_SREBP	11	-0.21394	-0.46465	0.978632	1	1	1991	tags=45%, list=33%, signal=30%	NFYC/HMGCS1/SC5D/NFYB/SMARCD3
REACTOME_TRNA_PROCESSING_IN_THE_NUCLEUS	REACTOME_TRNA_PROCESSING_IN_THE_NUCLEUS	21	0.194866	0.462789	0.988701	1	1	4851	tags=100%, list=81%, signal=19%	RPP14/SEH1L/RPP40/POP5/POP4/POM121C/NDC1/ELAC2/NUP50/NUP107/NUP205/DDX1/CSTF2/TSEN2/ZBTB8OS/NUP93/NUP133/RPP30/NUP54/C2orf49/CPSF4
REACTOME_PROCESSIVE_SYNTHESIS_ON_THE_C_STRAND_OF_THE_TELOMERE	REACTOME_PROCESSIVE_SYNTHESIS_ON_THE_C_STRAND_OF_THE_TELOMERE	11	0.216675	0.462085	0.975655	1	1	4718	tags=100%, list=78%, signal=22%	POLD4/DNA2/TERF2/LIG1/TINF2/POLD1/ACD/POLD3/TERF1/PCNA/RPA2
REACTOME_COPII_MEDIATED_VESICLE_TRANSPORT	REACTOME_COPII_MEDIATED_VESICLE_TRANSPORT	29	-0.17054	-0.46204	0.991304	1	1	1719	tags=28%, list=29%, signal=20%	TRAPPC3/NAPG/NAPB/TRAPPC9/NSF/CTSC/SEC31B/F8
REACTOME_APOPTOSIS	REACTOME_APOPTOSIS	53	-0.15271	-0.46174	0.997792	1	1	1535	tags=21%, list=25%, signal=16%	UNC5B/PPP3R1/CASP3/DYNLL1/RIPK1/AKT3/PSMB8/DFFB/DIABLO/GAS2/PSMA2
REACTOME_SIGNALING_BY_NOTCH4	REACTOME_SIGNALING_BY_NOTCH4	24	-0.17819	-0.4616	0.98913	1	1	1077	tags=29%, list=18%, signal=24%	PSMD8/UBC/PSMD12/PSMD13/PSMB8/NOTCH1/PSMA2
REACTOME_REGULATION_OF_TP53_EXPRESSION_AND_DEGRADATION	REACTOME_REGULATION_OF_TP53_EXPRESSION_AND_DEGRADATION	14	0.208458	0.461585	0.971645	1	1	4768	tags=100%, list=79%, signal=21%	CDK1/PRR5/AKT1/AKT2/PHF20/SGK1/PPP2R1B/RNF34/PPP2CB/DAXX/UBC/MDM2/USP2/AKT3
REACTOME_OVARIAN_TUMOR_DOMAIN_PROTEASES	REACTOME_OVARIAN_TUMOR_DOMAIN_PROTEASES	11	-0.21205	-0.46053	0.978632	1	1	2677	tags=73%, list=44%, signal=40%	ZRANB1/OTUB1/TNIP1/TNFAIP3/UBC/RIPK1/IFIH1/UBE2D1
REACTOME_G2_M_CHECKPOINTS	REACTOME_G2_M_CHECKPOINTS	49	0.160502	0.455003	0.998198	1	1	1181	tags=16%, list=20%, signal=13%	MCM10/KAT5/CDK1/CDC25A/RFC3/CDC6/EXO1/DNA2
REACTOME_EUKARYOTIC_TRANSLATION_INITIATION	REACTOME_EUKARYOTIC_TRANSLATION_INITIATION	20	-0.18128	-0.45327	0.980851	1	1	2209	tags=45%, list=37%, signal=29%	PABPC1/RPL22L1/EIF3J/EIF3H/RPS23/RPL14/RPL39L/EIF2B3/RPL26L1
REACTOME_AUTOPHAGY	REACTOME_AUTOPHAGY	65	-0.1443	-0.44928	1	1	1	73	tags=38%, list=1%, signal=38%	ATG4B/TUBA1A/SQSTM1/TSG101/PIK3C3/ATG14/UBE2L3/CHMP4C/CHMP3/RRAGD/UBC/MVB12A/CHMP4B/TBK1/CHMP2B/UBAP1/PEX5/DYNLL1/PRKAA2/TOMM22/USP30/PRKN/RRAGC/TUBB4A/TUBAL3
REACTOME_RAC2_GTPASE_CYCLE	REACTOME_RAC2_GTPASE_CYCLE	35	-0.15931	-0.44919	0.993631	1	1	1671	tags=26%, list=28%, signal=19%	NHS/ARHGAP39/ARHGAP32/CDC42/TAOK3/PIK3R3/DEF6/RAC2/TIAM1
REACTOME_DDX58_IFIH1_MEDIATED_INDUCTION_OF_INTERFERON_ALPHA_BETA	REACTOME_DDX58_IFIH1_MEDIATED_INDUCTION_OF_INTERFERON_ALPHA_BETA	29	0.175764	0.4486	0.99631	1	1	4967	tags=100%, list=83%, signal=18%	HERC5/RNF125/TKFC/FADD/IKBKE/NFKB2/TRAF2/TOMM70/CYLD/APP/ATG5/IRF3/NFKBIA/CHUK/NKIRAS2/PCBP2/UBE2K/TNFAIP3/IRF7/UBC/NLRX1/TBK1/TANK/CASP10/UBE2L6/RIPK1/NLRC5/IFIH1/UBE2D1
REACTOME_DISEASES_OF_PROGRAMMED_CELL_DEATH	REACTOME_DISEASES_OF_PROGRAMMED_CELL_DEATH	21	0.188016	0.446522	0.992467	1	1	2020	tags=38%, list=34%, signal=25%	MLKL/CDC25A/TRADD/FADD/PRIM1/LMNA/CAPN2/GSDME
REACTOME_POLYMERASE_SWITCHING_ON_THE_C_STRAND_OF_THE_TELOMERE	REACTOME_POLYMERASE_SWITCHING_ON_THE_C_STRAND_OF_THE_TELOMERE	14	0.200585	0.444152	0.977316	1	1	750	tags=14%, list=12%, signal=13%	POLD4/RFC3
REACTOME_FLT3_SIGNALING	REACTOME_FLT3_SIGNALING	11	0.208188	0.443985	0.985019	1	1	4769	tags=100%, list=79%, signal=21%	GRAP2/AKT1/AKT2/SOCS6/PTPN11/SH2B3/FYN/GRB10/UBC/AKT3/STAT5B
REACTOME_SIGNALING_BY_CSF1_M_CSF_IN_MYELOID_CELLS	REACTOME_SIGNALING_BY_CSF1_M_CSF_IN_MYELOID_CELLS	10	0.209651	0.439049	0.981168	1	1	4760	tags=100%, list=79%, signal=21%	GRAP2/CSF1R/SRC/PTPN11/INPP5D/FYN/PIK3CB/STAT1/UBC/PIK3CD
REACTOME_RNA_POLYMERASE_II_TRANSCRIBES_SNRNA_GENES	REACTOME_RNA_POLYMERASE_II_TRANSCRIBES_SNRNA_GENES	30	0.171913	0.43893	0.990637	1	1	4476	tags=97%, list=74%, signal=25%	POU2F1/POU2F2/INTS6/INTS12/INTS13/SNAPC1/CDK7/TAF6/NCBP1/TAF13/INTS1/PCF11/SNAPC4/TBP/INTS9/RPAP2/INTS7/POLR2B/GTF2E1/CDK9/GTF2F1/SSU72/SUPT5H/ICE2/INTS5/GTF2E2/GTF2B/POLR2F/ZNF143
REACTOME_RRNA_MODIFICATION_IN_THE_NUCLEUS_AND_CYTOSOL	REACTOME_RRNA_MODIFICATION_IN_THE_NUCLEUS_AND_CYTOSOL	21	0.183364	0.435473	0.992467	1	1	4920	tags=100%, list=82%, signal=18%	EMG1/NOL6/RRP7A/TSR3/TBL3/WDR36/MPHOSPH10/NOP56/DHX37/DIMT1/IMP4/NOP58/PNO1/WDR75/UTP3/NOL11/NOP14/UTP11/UTP15/UTP4/RRP9
REACTOME_CITRIC_ACID_CYCLE_TCA_CYCLE	REACTOME_CITRIC_ACID_CYCLE_TCA_CYCLE	11	0.201507	0.429737	0.988764	1	1	556	tags=9%, list=9%, signal=8%	CSKMT
REACTOME_TRNA_PROCESSING	REACTOME_TRNA_PROCESSING	43	0.156433	0.428495	0.994536	1	1	5085	tags=100%, list=84%, signal=16%	ADAT3/WDR4/PUS1/RPP14/GTPBP3/DUS2/NSUN6/SEH1L/RPP40/FTSJ1/OSGEP/TYW1/CDKAL1/ADAT1/PUS7/POP5/POP4/URM1/POM121C/NDC1/MTO1/ELAC2/NUP50/NUP107/NUP205/DDX1/CSTF2/TRMT9B/TSEN2/LCMT2/THADA/ZBTB8OS/QTRT2/TRMT10C/NUP93/NUP133/RPP30/NUP54/C2orf49/TRMT12/CPSF4/TRMT61B/TRMT5
REACTOME_DEADENYLATION_DEPENDENT_MRNA_DECAY	REACTOME_DEADENYLATION_DEPENDENT_MRNA_DECAY	19	-0.1727	-0.42758	0.987207	1	1	4266	tags=42%, list=71%, signal=12%	CNOT7/EXOSC1/PABPC1/CNOT11/EXOSC3/EIF4A3/LSM1/DCPS
REACTOME_MISMATCH_REPAIR	REACTOME_MISMATCH_REPAIR	10	0.20376	0.426713	0.986817	1	1	1111	tags=20%, list=18%, signal=16%	POLD4/EXO1
REACTOME_TNF_SIGNALING	REACTOME_TNF_SIGNALING	27	0.167696	0.420688	0.994485	1	1	5015	tags=100%, list=83%, signal=17%	TRAF1/TRADD/FADD/NSMAF/IKBKE/ULK1/OPTN/BAG4/TNFRSF1A/ADAM17/TRAF2/CYLD/RBCK1/CHUK/MAPKAPK2/TNFAIP3/TAB2/UBE2L3/SPATA2/UBC/TBK1/MIB2/SMPD2/USP2/RIPK1/UBE2D1/SPPL2B
REACTOME_PROTEIN_LOCALIZATION	REACTOME_PROTEIN_LOCALIZATION	60	0.143922	0.420401	0.99823	1	1	1813	tags=30%, list=30%, signal=21%	GET4/BAAT/NUDT7/TIMM13/TIMM8A/PEX6/MPV17/MTX1/MLYCD/HSCB/PITRM1/UBL4A/PEX26/TIMM50/PEX10/TIMM44/EMD/PEX2
REACTOME_HEDGEHOG_ON_STATE	REACTOME_HEDGEHOG_ON_STATE	24	-0.15934	-0.41277	0.997826	1	1	297	tags=29%, list=5%, signal=28%	PSMD8/UBC/PSMD12/PSMD13/SMURF2/PSMB8/PSMA2
REACTOME_RMTS_METHYLATE_HISTONE_ARGININES	REACTOME_RMTS_METHYLATE_HISTONE_ARGININES	11	-0.18988	-0.41239	0.987179	1	1	4880	tags=100%, list=81%, signal=19%	PRMT6/SMARCD1/DNMT3A/PRMT5/SMARCD2/SMARCE1/CCND1/PRMT1/PRMT3/SMARCD3
REACTOME_PROTEIN_UBIQUITINATION	REACTOME_PROTEIN_UBIQUITINATION	26	0.164331	0.411209	0.990842	1	1	5035	tags=100%, list=84%, signal=16%	UCHL3/RNF40/PEX10/RNF144A/PEX2/UBE2Q2/UBE2H/USP5/PAF1/RNF181/HLTF/PEX13/UBE2N/UBE2G1/UBE2A/UBE2K/DERL1/UBE2E3/UBE2L3/BCL10/UBC/PEX12/PEX5/PCNA/UBE2D1/RAD18
REACTOME_MITOCHONDRIAL_PROTEIN_IMPORT	REACTOME_MITOCHONDRIAL_PROTEIN_IMPORT	19	0.173792	0.410237	0.996248	1	1	2491	tags=63%, list=41%, signal=37%	TIMM13/TIMM8A/MTX1/HSCB/PITRM1/TIMM50/TIMM44/ATP5MC1/COA4/TIMM23/GFER/TOMM70
REACTOME_G2_M_DNA_DAMAGE_CHECKPOINT	REACTOME_G2_M_DNA_DAMAGE_CHECKPOINT	25	0.165181	0.409941	0.996296	1	1	1181	tags=20%, list=20%, signal=16%	KAT5/CDK1/RFC3/EXO1/DNA2
REACTOME_CELLULAR_SENESCENCE	REACTOME_CELLULAR_SENESCENCE	37	0.14929	0.399063	0.998175	1	1	637	tags=8%, list=11%, signal=7%	ANAPC15/KAT5/E2F1
REACTOME_ANCHORING_OF_THE_BASAL_BODY_TO_THE_PLASMA_MEMBRANE	REACTOME_ANCHORING_OF_THE_BASAL_BODY_TO_THE_PLASMA_MEMBRANE	36	-0.14133	-0.39878	0.997868	1	1	1478	tags=22%, list=25%, signal=17%	CEP89/TCTN3/CEP97/DYNLL1/TUBB4A/TCTN2/CEP152/PRKAR2B
REACTOME_REGULATION_OF_MRNA_STABILITY_BY_PROTEINS_THAT_BIND_AU_RICH_ELEMENTS	REACTOME_REGULATION_OF_MRNA_STABILITY_BY_PROTEINS_THAT_BIND_AU_RICH_ELEMENTS	24	-0.15261	-0.39534	0.997826	1	1	297	tags=38%, list=5%, signal=36%	EXOSC1/PABPC1/PSMD8/UBC/PSMD12/PSMD13/EXOSC3/PSMB8/PSMA2
REACTOME_FORMATION_OF_WDR5_CONTAINING_HISTONE_MODIFYING_COMPLEXES	REACTOME_FORMATION_OF_WDR5_CONTAINING_HISTONE_MODIFYING_COMPLEXES	14	0.178264	0.394727	0.990548	1	1	824	tags=14%, list=14%, signal=12%	HCFC2/PAGR1
REACTOME_MITOTIC_G1_PHASE_AND_G1_S_TRANSITION	REACTOME_MITOTIC_G1_PHASE_AND_G1_S_TRANSITION	59	0.134396	0.392425	1	1	1	2197	tags=34%, list=36%, signal=22%	MCM10/E2F1/CDK1/CDC25A/CDC6/LIN54/JAK2/CDKN2B/MCM6/POLE2/PRIM1/MCM5/TFDP1/MNAT1/PSMD7/AKT1/CDK7/CCNB1/MCM2/AKT2
REACTOME_AURKA_ACTIVATION_BY_TPX2	REACTOME_AURKA_ACTIVATION_BY_TPX2	27	0.156001	0.391351	0.996324	1	1	1706	tags=30%, list=28%, signal=21%	CNTRL/CDK1/CEP192/CEP290/HAUS4/HAUS5/AURKA/TUBA4A
REACTOME_SIGNALING_BY_TGFB_FAMILY_MEMBERS	REACTOME_SIGNALING_BY_TGFB_FAMILY_MEMBERS	49	-0.13231	-0.39025	1	1	1	1060	tags=12%, list=18%, signal=10%	INHBA/UBE2D1/TGFB3/FGF2/FST/ITGA8
REACTOME_RAC3_GTPASE_CYCLE	REACTOME_RAC3_GTPASE_CYCLE	33	-0.13866	-0.3877	1	1	1	488	tags=21%, list=8%, signal=20%	NHS/ARHGAP39/ARHGAP32/CDC42/TAOK3/TIAM1/ARHGAP6
REACTOME_SYNTHESIS_OF_PA	REACTOME_SYNTHESIS_OF_PA	11	-0.17707	-0.38456	0.991453	1	1	4957	tags=27%, list=82%, signal=5%	DDHD2/PLA2G10/PLA2G4A
REACTOME_TRANS_GOLGI_NETWORK_VESICLE_BUDDING	REACTOME_TRANS_GOLGI_NETWORK_VESICLE_BUDDING	34	0.143837	0.375696	1	1	1	249	tags=3%, list=4%, signal=3%	CLVS1
REACTOME_SYNTHESIS_OF_ACTIVE_UBIQUITIN_ROLES_OF_E1_AND_E2_ENZYMES	REACTOME_SYNTHESIS_OF_ACTIVE_UBIQUITIN_ROLES_OF_E1_AND_E2_ENZYMES	11	0.175237	0.373714	0.994382	1	1	4967	tags=100%, list=83%, signal=18%	UCHL3/UBE2Q2/UBE2H/USP5/UBE2G1/UBE2A/UBE2K/UBE2E3/UBE2L3/UBC/UBE2D1
REACTOME_INTRINSIC_PATHWAY_FOR_APOPTOSIS	REACTOME_INTRINSIC_PATHWAY_FOR_APOPTOSIS	17	-0.15622	-0.37184	0.997835	1	1	1451	tags=29%, list=24%, signal=22%	PPP3R1/CASP3/DYNLL1/AKT3/DIABLO
REACTOME_REGULATION_OF_PLK1_ACTIVITY_AT_G2_M_TRANSITION	REACTOME_REGULATION_OF_PLK1_ACTIVITY_AT_G2_M_TRANSITION	35	0.141248	0.370423	1	1	1	2270	tags=43%, list=38%, signal=27%	CNTRL/CDK1/CEP192/CEP290/HAUS4/HAUS5/PPP1R12A/AURKA/TUBA4A/CENPJ/CEP72/BORA/CCNB1/TUBB4B/OPTN
REACTOME_METABOLISM_OF_RNA	REACTOME_METABOLISM_OF_RNA	235	0.105133	0.367755	1	1	1	25	tags=0%, list=0%, signal=0%	GTF2H4
REACTOME_TOLL_LIKE_RECEPTOR_9_TLR9_CASCADE	REACTOME_TOLL_LIKE_RECEPTOR_9_TLR9_CASCADE	46	0.131775	0.365559	1	1	1	687	tags=9%, list=11%, signal=8%	ALPK1/TLR4/IRAK2/RPS6KA5
REACTOME_ERK_MAPK_TARGETS	REACTOME_ERK_MAPK_TARGETS	10	-0.16815	-0.36253	0.993631	1	1	1144	tags=20%, list=19%, signal=16%	MEF2C/VRK3
REACTOME_RNA_POLYMERASE_III_TRANSCRIPTION_INITIATION_FROM_TYPE_3_PROMOTER	REACTOME_RNA_POLYMERASE_III_TRANSCRIPTION_INITIATION_FROM_TYPE_3_PROMOTER	12	0.167319	0.361286	0.996289	1	1	959	tags=17%, list=16%, signal=14%	BRF2/POU2F1
REACTOME_TELOMERE_C_STRAND_LAGGING_STRAND_SYNTHESIS	REACTOME_TELOMERE_C_STRAND_LAGGING_STRAND_SYNTHESIS	17	0.153458	0.355117	1	1	1	2657	tags=65%, list=44%, signal=36%	POLD4/RFC3/DNA2/PRIM1/TERF2/LIG1/CTC1/RFC1/TINF2/POLD1/ACD
REACTOME_ACTIVATED_NOTCH1_TRANSMITS_SIGNAL_TO_THE_NUCLEUS	REACTOME_ACTIVATED_NOTCH1_TRANSMITS_SIGNAL_TO_THE_NUCLEUS	15	0.152873	0.344611	0.998117	1	1	5102	tags=100%, list=85%, signal=15%	DNER/DLL4/DLK1/DLL1/ARRB1/ADAM17/APH1A/DTX4/PSEN2/APH1B/ADAM10/UBC/MIB2/DTX2/NOTCH1
REACTOME_PROCESSING_OF_DNA_DOUBLE_STRAND_BREAK_ENDS	REACTOME_PROCESSING_OF_DNA_DOUBLE_STRAND_BREAK_ENDS	22	0.141187	0.340258	1	1	1	1181	tags=18%, list=20%, signal=15%	KAT5/RFC3/EXO1/DNA2
REACTOME_INTERLEUKIN_17_SIGNALING	REACTOME_INTERLEUKIN_17_SIGNALING	29	-0.1252	-0.3392	1	1	1	703	tags=93%, list=12%, signal=83%	RPS6KA1/MAPKAPK3/RPS6KA2/IRAK1/MAPK7/IL17RB/RIPK2/FOS/DUSP7/CREB1/TNIP2/DUSP6/CHUK/MAPKAPK2/UBE2N/CUL1/PPP2R1B/MAP2K3/FBXW11/TAB2/JUN/PPP2CB/UBC/MAP2K1/MEF2C/VRK3/MAP3K8
REACTOME_GLYCOSPHINGOLIPID_CATABOLISM	REACTOME_GLYCOSPHINGOLIPID_CATABOLISM	17	-0.13113	-0.31213	1	1	1	409	tags=35%, list=7%, signal=33%	CTSA/ASAH1/ARSG/SMPD2/GALC/GLB1L2
REACTOME_MYD88_INDEPENDENT_TLR4_CASCADE	REACTOME_MYD88_INDEPENDENT_TLR4_CASCADE	50	0.106124	0.301756	1	1	1	687	tags=8%, list=11%, signal=7%	ALPK1/TLR4/IRAK2/RPS6KA5
REACTOME_CYCLIN_A_CDK2_ASSOCIATED_EVENTS_AT_S_PHASE_ENTRY	REACTOME_CYCLIN_A_CDK2_ASSOCIATED_EVENTS_AT_S_PHASE_ENTRY	31	-0.10826	-0.2976	1	1	1	297	tags=29%, list=5%, signal=28%	PSMD8/UBC/CKS1B/PSMD12/PSMD13/CCNE1/AKT3/PSMB8/PSMA2
REACTOME_MAPK_TARGETS_NUCLEAR_EVENTS_MEDIATED_BY_MAP_KINASES	REACTOME_MAPK_TARGETS_NUCLEAR_EVENTS_MEDIATED_BY_MAP_KINASES	14	0.116717	0.258443	1	1	1	5319	tags=100%, list=88%, signal=12%	RPS6KA5/RPS6KA1/RPS6KA2/MAPK7/FOS/DUSP7/CREB1/DUSP6/MAPKAPK2/PPP2R1B/JUN/PPP2CB/MEF2C/VRK3
