# Supplementary material for: Epigenetic control of PDX1 and NGN3 by a computationally designed PRC2 inhibitor enforces pancreatic endocrine differentiation from pluripotent stem cells
Source: Research Square preprint supplement (doi:10.21203/rs.3.rs-9115136/v1), 2026-03-26
Supplement: Supplementary file 8 [file d1f9893680d4f70ce4f4fed1.xlsx]

## Sheet: Sheet1
Table S4- List of nearest neibhoring genes to the top 1% significant H3K27ac peaks unique to EBdCas9 + PDX1/NGN3 gRNAs
PeakID (cmd=annotatePeaks.pl /anvil/scratch/x-sbattle/pancreatic/peaks/union_unique_peaks/Hunion_unique.top0.01.peaks.bed hg38 -go)	Chr	Start	End	Strand	Peak Score	Focus Ratio/Region Size	Annotation	Detailed Annotation	Distance to TSS	Nearest PromoterID	Entrez ID	Nearest Unigene	Nearest Refseq	Nearest Ensembl	Gene Name	Gene Alias	Gene Description	Gene Type
5509	chr13	114354121	114354336	+	53	NA	Intergenic	(AGGGTT)n|Simple_repeat|Simple_repeat	-20280	NR_126391	104355150		NR_126391		LINC01054	-	long intergenic non-protein coding RNA 1054	ncRNA
11979	chr6	89375459	89376015	+	44	NA	intron (NM_021244, intron 5 of 6)	intron (NM_021244, intron 5 of 6)	-23015	NM_016021	51465		NM_016021	ENSG00000198833	UBE2J1	CGI-76|HSPC153|HSPC205|HSU93243|NCUBE-1|NCUBE1|UBC6|UBC6E|Ubc6p	ubiquitin conjugating enzyme E2 J1	protein-coding
17781	chr6	113564346	113565406	+	42	NA	Intergenic	Intergenic	85199	NR_125844	101927686		NR_125844	ENSG00000230943	LINC02541	-	long intergenic non-protein coding RNA 2541	ncRNA
11102	chr11	10450938	10451910	+	42	NA	intron (NM_000480, intron 1 of 14)	intron (NM_000480, intron 1 of 14)	733	NM_000480	272		NM_000480	ENSG00000133805	AMPD3	-	adenosine monophosphate deaminase 3	protein-coding
7167	chr20	62238115	62238450	+	41	NA	promoter-TSS (NM_001278649)	promoter-TSS (NM_001278649)	-239	NM_001363878	9885		NM_014835	ENSG00000130703	OSBPL2	DFNA67|DNFA67|ORP-2|ORP2	oxysterol binding protein like 2	protein-coding
9661	chr4	82284588	82285286	+	40	NA	Intergenic	CpG	89054	NM_031370	3184		NM_002138	ENSG00000138668	HNRNPD	AUF1|AUF1A|HNRPD|P37|hnRNPD0	heterogeneous nuclear ribonucleoprotein D	protein-coding
8639	chr9	101449187	101449557	+	36	NA	Intergenic	CpG	-13598	NM_000035	229		NM_000035	ENSG00000136872	ALDOB	ALDB|ALDO2	aldolase, fructose-bisphosphate B	protein-coding
8558	chr15	64460157	64460704	+	36	NA	promoter-TSS (NM_015042)	promoter-TSS (NM_015042)	-148	NM_015042	23060		NM_015042	ENSG00000180357	ZNF609	-	zinc finger protein 609	protein-coding
8578	chr7	65038287	65038706	+	35	NA	non-coding (NR_033416, exon 1 of 11)	non-coding (NR_033416, exon 1 of 11)	142	NR_033416	643180		NR_033416	ENSG00000290860	CCT6P3	CCT6-3P	chaperonin containing TCP1 subunit 6 pseudogene 3	pseudo
8555	chrY	318736	319208	+	35	NA	promoter-TSS (NR_027232)	promoter-TSS (NR_027232)	-153	NM_012227	8225		NM_012227	ENSG00000178605	GTPBP6	PGPL	GTP binding protein 6 (putative)	protein-coding
7805	chr17	31487508	31487956	+	35	NA	promoter-TSS (NM_001346747)	promoter-TSS (NM_001346747)	-376	NM_001303542	84440		NM_032932	ENSG00000131242	RAB11FIP4	FIP4-Rab11|RAB11-FIP4	RAB11 family interacting protein 4	protein-coding
13906	chr3	54998882	55000981	+	34	NA	intron (NM_018398, intron 31 of 37)	intron (NM_018398, intron 31 of 37)	-32829	NM_001304389	57408		NM_020678	ENSG00000144771	LRTM1	HT017	leucine rich repeats and transmembrane domains 1	protein-coding
11754	chr3	48898152	48899208	+	34	NA	intron (NM_000387, intron 1 of 8)	CpG	202	NM_000387	788		NM_000387	ENSG00000178537	SLC25A20	CAC|CACT	solute carrier family 25 member 20	protein-coding
7469	chr14	56125686	56126432	+	34	NA	intron (NM_021255, intron 1 of 5)	intron (NM_021255, intron 1 of 5)	7648	NM_021255	57161		NM_021255	ENSG00000139946	PELI2	-	pellino E3 ubiquitin protein ligase family member 2	protein-coding
8857	chr11	46845986	46846445	+	34	NA	promoter-TSS (NM_001008938)	promoter-TSS (NM_001008938)	65	NM_001008938	9793		NM_014756	ENSG00000175216	CKAP5	CHTOG|MSPS|TOG|TOGp|ch-TOG	cytoskeleton associated protein 5	protein-coding
7293	chr19	11155474	11156099	+	33	NA	promoter-TSS (NM_182513)	promoter-TSS (NM_182513)	-4	NM_001317033
6616	chr19	14117733	14118115	+	33	NA	promoter-TSS (NM_002730)	promoter-TSS (NM_002730)	-162	NM_002730	5566		NM_002730	ENSG00000072062	PRKACA	CAFD1|PKACA|PPNAD4	protein kinase cAMP-activated catalytic subunit alpha	protein-coding
14061	chr1	174974192	174975555	+	33	NA	intron (NM_001243764, intron 2 of 6)	intron (NM_001243764, intron 2 of 6)	10095	NM_001243764	9910		NM_014857	ENSG00000152061	RABGAP1L	HHL|TBC1D18	RAB GTPase activating protein 1 like	protein-coding
14735	chr12	53299312	53300414	+	33	NA	TTS (NM_002624)	TTS (NM_002624)	168	NM_021640	60314		NM_021640	ENSG00000139637	MYG1	C12orf10|Gamm1|MST024|MSTP024|MYG	MYG1 exonuclease	protein-coding
15267	chr11	61602745	61603988	+	32	NA	intron (NR_110189, intron 3 of 3)	intron (NR_110189, intron 3 of 3)	-11670	NR_002775	113157		NR_002775	ENSG00000293352	RPLP0P2	RPLP0L2|RPLP0_3_1146	ribosomal protein lateral stalk subunit P0 pseudogene 2	pseudo
8776	chr16	1942703	1943734	+	32	NA	promoter-TSS (NM_001382265)	promoter-TSS (NM_001382265)	-19	NM_001382264	51734		NM_016332	ENSG00000198736	MSRB1	HSPC270|SELENOR|SELENOX|SELR|SELX|SEPX1|SepR	methionine sulfoxide reductase B1	protein-coding
5388	chr7	36967239	36967852	+	32	NA	intron (NM_014800, intron 16 of 21)	intron (NM_014800, intron 16 of 21)	17567	NM_001039459	9844		NM_014800	ENSG00000155849	ELMO1	CED-12|CED12|ELMO-1	engulfment and cell motility 1	protein-coding
7743-2	chrX	318728	319203	+	32	NA	promoter-TSS (NM_012227)	promoter-TSS (NM_012227)	-146	NM_012227	8225		NM_012227	ENSG00000178605	GTPBP6	PGPL	GTP binding protein 6 (putative)	protein-coding
7419	chr1	107692638	107693213	+	32	NA	intron (NM_006113, intron 17 of 26)	intron (NM_006113, intron 17 of 26)	-4426	NM_001079874	10451		NM_006113	ENSG00000134215	VAV3	-	vav guanine nucleotide exchange factor 3	protein-coding
10698	chr3	139677200	139678043	+	31	NA	intron (NM_001320511, intron 1 of 6)	CpG	351	NM_001320510	349565		NM_178177	ENSG00000163864	NMNAT3	FKSG76|PNAT-3|PNAT3	nicotinamide nucleotide adenylyltransferase 3	protein-coding
9181	chr1	44986174	44986859	+	31	NA	promoter-TSS (NM_020365)	promoter-TSS (NM_020365)	79	NM_020365	8891		NM_020365	ENSG00000070785	EIF2B3	EIF-2B|EIF2Bgamma|VWM3	eukaryotic translation initiation factor 2B subunit gamma	protein-coding
6554	chr19	4723649	4724367	+	31	NA	promoter-TSS (NM_001384623)	promoter-TSS (NM_001384623)	-166	NM_001384624	91039		NM_139159	ENSG00000142002	DPP9	DP9|DPLP9|DPP IX|DPRP-2|DPRP2|HATIS|IMD111	dipeptidyl peptidase 9	protein-coding
10787	chr4	9691107	9692001	+	31	NA	Intergenic	Intergenic	-90080	NM_000798	1816		NM_000798	ENSG00000169676	DRD5	DBDR|DRD1B|DRD1L2	dopamine receptor D5	protein-coding
14256	chr17	14308798	14309956	+	31	NA	intron (NM_006041, intron 1 of 1)	CpG	5637	NR_026880	84815		NM_032729	ENSG00000266709	MGC12916	-	uncharacterized protein MGC12916	ncRNA
8543	chr1	226109528	226110023	+	31	NA	Intergenic	CpG	26200	NR_146920	105373113		NR_146920		LINC01703	lncPARP1	long intergenic non-protein coding RNA 1703	ncRNA
8183	chr17	47067118	47067624	+	31	NA	Intergenic	HERVIP10FH-int|LTR|ERV1	-88118	NM_203400	388394		NM_203400	ENSG00000179673	RPRML	-	reprimo like	protein-coding
8836	chr5	72172560	72173411	+	31	NA	intron (NM_005909, intron 2 of 6)	MIR|SINE|MIR	3518	NR_039967	100616377		NR_039967	ENSG00000264099	MIR4803	-	microRNA 4803	ncRNA
10034	chr21	8213715	8214452	+	31	NA	non-coding (NR_003287, exon 1 of 3)	non-coding (NR_003287, exon 1 of 3)	195	NR_146148	109864282		NR_146148		RNA28SN2	-	RNA, 28S ribosomal N2	rRNA
13504	chr15	70891752	70893168	+	30	NA	promoter-TSS (NM_017691)	promoter-TSS (NM_017691)	17	NM_001363732	54839		NM_017691	ENSG00000137821	LRRC49	CSTPP2|PGs4	leucine rich repeat containing 49	protein-coding
6756	chr1	224929344	224929848	+	30	NA	promoter-TSS (NM_001349912)	promoter-TSS (NM_001349912)	-58	NM_144989	127602		NM_001373	ENSG00000185842	DNAH14	C1orf67|Dnahc14|HL-18|HL18	dynein axonemal heavy chain 14	protein-coding
7088	chr10	68231141	68231578	+	30	NA	exon (NM_145178, exon 1 of 1)	exon (NM_145178, exon 1 of 1)	754	NM_145178	220202		NM_145178	ENSG00000179774	ATOH7	Math5|NCRNA|PHPVAR|RNANC|bHLHa13	atonal bHLH transcription factor 7	protein-coding
8413	chr6	6712518	6713271	+	30	NA	Intergenic	Intergenic	-90068	NR_026970	285780		NM_173675	ENSG00000216863	LY86-AS1	LY86-AS|LY86AS	LY86 antisense RNA 1	ncRNA
8898	chr14	89368517	89369273	+	30	NA	intron (NM_001085471, intron 2 of 6)	intron (NM_001085471, intron 2 of 6)	48338	NM_005197	1112		NM_005197	ENSG00000053254	FOXN3	C14orf116|CHES1|PRO1635	forkhead box N3	protein-coding
8494	chr12	119006333	119007255	+	30	NA	intron (NM_194286, intron 1 of 12)	intron (NM_194286, intron 1 of 12)	25253	NM_194286	84530		NM_194286	ENSG00000139767	SRRM4	KIAA1853|MU-MB-2.76|nSR100	serine/arginine repetitive matrix 4	protein-coding
6879	chr5	141560564	141561073	+	29	NA	intron (NR_038333, intron 1 of 2)	intron (NR_038333, intron 1 of 2)	2507	NR_038333	100505658		NR_038333	ENSG00000246422	DIAPH1-AS1	-	DIAPH1 antisense RNA 1	ncRNA
6296	chr2	10448586	10449147	+	29	NA	promoter-TSS (NM_001287188)	promoter-TSS (NM_001287188)	-539	NM_002539	4953		NM_002539	ENSG00000115758	ODC1	BABS|NEDBA|NEDBIA|ODC	ornithine decarboxylase 1	protein-coding
7452	chr11	110130517	110131222	+	28	NA	intron (NM_033390, intron 1 of 5)	intron (NM_033390, intron 1 of 5)	37477	NM_033390	85463		NM_033390	ENSG00000149289	ZC3H12C	MCPIP3	zinc finger CCCH-type containing 12C	protein-coding
8038	chr3	141231168	141231806	+	28	NA	promoter-TSS (NM_001037172)	promoter-TSS (NM_001037172)	-338	NM_001282728	92370		NM_152282	ENSG00000155893	PXYLP1	ACPL2|HEL124|XYLP	2-phosphoxylose phosphatase 1	protein-coding
11620	chr2	85433294	85434552	+	28	NA	intron (NM_201594, intron 14 of 20)	intron (NM_201594, intron 14 of 20)	14992	NM_201594
9821	chr8	48921330	48922085	+	28	NA	promoter-TSS (NM_003068)	promoter-TSS (NM_003068)	-278	NM_003068	6591		NM_003068	ENSG00000019549	SNAI2	SLUG|SLUGH|SLUGH1|SNAIL2|WS2D	snail family transcriptional repressor 2	protein-coding
8888	chr8	80578291	80579442	+	28	NA	Intergenic	CpG	92640	NM_001105539	65986		NM_023929	ENSG00000205189	ZBTB10	RINZF	zinc finger and BTB domain containing 10	protein-coding
9031	chr2	164890131	164891221	+	28	NA	Intergenic	MamRTE1|LINE|RTE-BovB	-48600	NM_001278460	22837		NM_014900	ENSG00000082438	COBLL1	COBLR1	cordon-bleu WH2 repeat protein like 1	protein-coding
6705	chr19	32674956	32675579	+	28	NA	promoter-TSS (NM_032139)	promoter-TSS (NM_032139)	-87	NM_032139	84079		NM_032139	ENSG00000105186	ANKRD27	PP12899|VARP	ankyrin repeat domain 27	protein-coding
8508	chr17	46193629	46194324	+	28	NA	promoter-TSS (NM_015443).2	promoter-TSS (NM_015443).2	403	NR_034172	644246		NR_034172	ENSG00000214401	KANSL1-AS1	-	KANSL1 antisense RNA 1	ncRNA
11062	chr1	74342838	74343735	+	27	NA	intron (NM_015978, intron 9 of 24)	intron (NM_015978, intron 9 of 24)	107899	NM_015978	51086		NM_015978	ENSG00000116783	TNNI3K	CARK|CCDD	TNNI3 interacting kinase	protein-coding
12811	chr20	21522721	21523637	+	27	NA	Intergenic	CpG	-9115	NM_002509	4821		NM_002509	ENSG00000125820	NKX2-2	NKX2.2|NKX2B	NK2 homeobox 2	protein-coding
6644	chr1	31938428	31938910	+	27	NA	promoter-TSS (NM_001195101)	promoter-TSS (NM_001195101)	-301	NM_001195101	8073		NM_003479	ENSG00000184007	PTP4A2	HH13|HH7-2|HU-PP-1|OV-1|PRL-2|PRL2|PTP4A|PTPCAAX2|ptp-IV1a|ptp-IV1b	protein tyrosine phosphatase 4A2	protein-coding
9618	chr16	30406995	30407982	+	27	NA	promoter-TSS (NM_001142305)	promoter-TSS (NM_001142305)	74	NM_016643	51333		NM_016643	ENSG00000179965	ZNF771	DSC43	zinc finger protein 771	protein-coding
7164	chr18	10953601	10954250	+	27	NA	intron (NM_001378183, intron 3 of 55)	LTR53B|LTR|ERVL	-194276	NR_106846	102466735		NR_106846	ENSG00000274838	MIR6788	hsa-mir-6788	microRNA 6788	ncRNA
8448	chr12	119008445	119009554	+	27	NA	intron (NM_194286, intron 1 of 12)	intron (NM_194286, intron 1 of 12)	27458	NM_194286	84530		NM_194286	ENSG00000139767	SRRM4	KIAA1853|MU-MB-2.76|nSR100	serine/arginine repetitive matrix 4	protein-coding
7964	chr4	1792434	1793093	+	27	NA	promoter-TSS (NR_148971)	promoter-TSS (NR_148971)	-530	NM_001354810	2261		NM_000142	ENSG00000068078	FGFR3	ACH|CD333|CEK2|HSFGFR3EX|JTK4	fibroblast growth factor receptor 3	protein-coding
7163	chr2	219387033	219388064	+	27	NA	promoter-TSS (NM_001319118)	promoter-TSS (NM_001319118)	-186	NM_001319118	23549		NM_012100	ENSG00000123992	DNPEP	ASPEP|DAP	aspartyl aminopeptidase	protein-coding
9848	chr1	155050606	155051271	+	27	NA	promoter-TSS (NM_207197)	promoter-TSS (NM_207197)	227	NR_040772	100505666		NR_040772		DCST1-AS1	-	DCST1 antisense RNA 1	ncRNA
6892	chr3	194633370	194633962	+	27	NA	promoter-TSS (NM_001166306)	promoter-TSS (NM_001166306)	-247	NM_001011655	93109		NM_138399	ENSG00000145014	TMEM44	-	transmembrane protein 44	protein-coding
8945	chr17	17041777	17042410	+	27	NA	promoter-TSS (NM_001364716)	promoter-TSS (NM_001364716)	-364	NM_201274	23164		NM_015134	ENSG00000133030	MPRIP	M-RIP|MRIP|RHOIP3|RIP3|p116Rip	myosin phosphatase Rho interacting protein	protein-coding
7521	chr19	35931191	35932071	+	27	NA	Intergenic	CpG	-4743	NM_024509	79414		NM_024509	ENSG00000126243	LRFN3	FIGLER1|SALM4	leucine rich repeat and fibronectin type III domain containing 3	protein-coding
10017-2	chr7	140241924	140243134	+	27	NA	Intergenic	Intergenic	65268	NR_024451	100134229		NR_024451	ENSG00000260231	KDM7A-DT	JHDM1D-AS1	KDM7A divergent transcript	ncRNA
9029	chr9	104991255	104992511	+	26	NA	Intergenic	Intergenic	-63728	NM_005502	19		NM_005502	ENSG00000165029	ABCA1	ABC-1|ABC1|CERP|HDLCQTL13|HDLDT1|HPALP1|TGD	ATP binding cassette subfamily A member 1	protein-coding
7973	chr10	35447771	35448917	+	26	NA	intron (NM_001282853, intron 2 of 10)	MIR|SINE|MIR	111470	NM_001282852	219771		NM_145012	ENSG00000108100	CCNY	C10orf9|CBCP1|CCNX|CFP1	cyclin Y	protein-coding
8142	chr8	56074025	56074708	+	26	NA	promoter-TSS (NR_002437)	promoter-TSS (NR_002437)	140	NM_001146227	6224		NM_001023	ENSG00000008988	RPS20	S20|uS10	ribosomal protein S20	protein-coding
6273	chr16_KI270853v1_alt	760176	760760	+	26	NA	promoter-TSS (NR_036141).5	promoter-TSS (NR_036141).5	-102	NR_036141	100422870		NR_036141	ENSG00000265537	MIR3180-1	-	microRNA 3180-1	ncRNA
7390	chr18	47175336	47176361	+	26	NA	intron (NM_016097, intron 1 of 2)	AluYk2|SINE|Alu	516	NM_016097	51124		NM_016097	ENSG00000134049	IER3IP1	HSPC039|MEDS|PRO2309	immediate early response 3 interacting protein 1	protein-coding
7925	chr3	133805405	133806453	+	26	NA	exon (NM_021203, exon 2 of 8)	exon (NM_021203, exon 2 of 8)	114	NR_163491	58477		NM_021203	ENSG00000144867	SRPRB	APMCF1|SR-beta	SRP receptor subunit beta	protein-coding
6189	chr15	90902254	90902648	+	26	NA	promoter-TSS (NR_135502)	promoter-TSS (NR_135502)	69	NM_001320977	4122		NM_006122	ENSG00000196547	MAN2A2	MANA2X|alpha-MIIx	mannosidase alpha class 2A member 2	protein-coding
8970	chr11	60855944	60856642	+	26	NA	promoter-TSS (NM_004778)	promoter-TSS (NM_004778)	-343	NM_004778	11251		NM_004778	ENSG00000183134	PTGDR2	CD294|CRTH2|DL1R|DP2|GPR44	prostaglandin D2 receptor 2	protein-coding
8125	chr12	104986136	104986923	+	26	NA	intron (NM_152318, intron 1 of 3)	CpG	213	NM_152318	121053		NM_152318	ENSG00000151131	NOPCHAP1	C12orf45|DDSR1	NOP protein chaperone 1	protein-coding
7512	chr9	127771020	127771761	+	26	NA	promoter-TSS (NM_005489)	promoter-TSS (NM_005489)	-21	NM_001252334	10044		NM_005489	ENSG00000095370	SH2D3C	CHAT|NSP3|PRO34088|SHEP1	SH2 domain containing 3C	protein-coding
6018	chr6	26520411	26520882	+	26	NA	Intergenic	Intergenic	-1060	NR_026790	493812		NR_026790	ENSG00000228223	HCG11	CTA-14H9.3|bK14H9.3	HLA complex group 11	ncRNA
8572	chr11	1309713	1310441	+	26	NA	promoter-TSS (NM_019009)	promoter-TSS (NM_019009)	369	NR_029409	255512		NR_029409	ENSG00000255153	TOLLIP-DT	TOLLIP-AS1	TOLLIP divergent transcript	ncRNA
13339	chr22	37111310	37112877	+	26	NA	Intergenic	Intergenic	-2380	NM_001289000	164656		NM_153019	ENSG00000187045	TMPRSS6	IRIDA|MT2	transmembrane serine protease 6	protein-coding
7220	chr21	8212338	8213223	+	26	NA	TTS (NR_003285)	TTS (NR_003285)	208	NR_146120	109864274		NR_146120		RNA5-8SN4	RN5-8S1|RNA5-8S5	RNA, 5.8S ribosomal N4	rRNA
6949-2	chr3	101779090	101779672	+	26	NA	promoter-TSS (NM_001348991)	promoter-TSS (NM_001348991)	170	NM_001348992	91775		NM_145037	ENSG00000144815	NXPE3	FAM55C|MST115|MSTP115	neurexophilin and PC-esterase domain family member 3	protein-coding
6711	chr9	123359474	123360607	+	26	NA	intron (NM_173689, intron 1 of 12)	intron (NM_173689, intron 1 of 12)	3843	NM_173689	286204		NM_173689	ENSG00000148204	CRB2	FSGS9|VMCKD	crumbs cell polarity complex component 2	protein-coding
6536-2	chrX	130268023	130268992	+	26	NA	intron (NM_017666, intron 1 of 18)	CpG	392	NM_017666	55609		NM_017666	ENSG00000056277	ZNF280C	SUHW3|ZNF633|ZPET	zinc finger protein 280C	protein-coding
10087	chr22	21468098	21469309	+	26	NA	intron (NM_001207052, intron 4 of 8)	CpG-18822	1533	NM_001207052	645426		NM_001207052	ENSG00000206140	TMEM191C	-	transmembrane protein 191C	protein-coding
9090	chr1	98661764	98662515	+	26	NA	intron (NM_152238, intron 1 of 7)	CpG	418	NM_001364903	51375		NM_015976	ENSG00000162627	SNX7	-	sorting nexin 7	protein-coding
9432	chr2	231686948	231688070	+	26	NA	Intergenic	Intergenic	-21016	NM_001099285	5757		NM_002823	ENSG00000187514	PTMA	TMSA	prothymosin alpha	protein-coding
8196	chr1	36576163	36577431	+	26	NA	Intergenic	Intergenic	-93483	NM_156039	1441		NM_000760	ENSG00000119535	CSF3R	CD114|GCSFR|SCN7	colony stimulating factor 3 receptor	protein-coding
6610	chr17	50660793	50661460	+	26	NA	intron (NM_001144070, intron 8 of 11)	intron (NM_001144070, intron 8 of 11)	26245	NM_001144070	8714		NM_003786	ENSG00000108846	ABCC3	ABC31|EST90757|MLP2|MOAT-D|MRP3|cMOAT2	ATP binding cassette subfamily C member 3	protein-coding
7679	chr21	31659333	31659968	+	26	NA	promoter-TSS (NM_000454)	promoter-TSS (NM_000454)	-43	NM_000454	6647		NM_000454	ENSG00000142168	SOD1	ALS|ALS1|HEL-S-44|IPOA|SOD|STAHP|hSod1|homodimer	superoxide dismutase 1	protein-coding
5978-2	chrY	1452947	1453387	+	26	NA	promoter-TSS (NM_004192)	promoter-TSS (NM_004192)	-258	NM_004192	8623		NM_004192	ENSG00000169093	ASMTL	ASMTLX|ASMTLY|ASTML	acetylserotonin O-methyltransferase like	protein-coding
6458	chr14	49687968	49688722	+	25	NA	promoter-TSS (NM_001348385)	promoter-TSS (NM_001348385)	35	NM_001197330	5427		NM_002692	ENSG00000100479	POLE2	DPE2	DNA polymerase epsilon 2, accessory subunit	protein-coding
10794	chr9	133335415	133336853	+	25	NA	promoter-TSS (NM_006753)	promoter-TSS (NM_006753)	54	NR_103874	6838		NM_006753	ENSG00000148296	SURF6	RRP14	surfeit 6	protein-coding
5911	chr4	159103499	159103975	+	25	NA	promoter-TSS (NM_001351724)	promoter-TSS (NM_001351724)	-314	NM_001351724	9693		NM_014247	ENSG00000109756	RAPGEF2	CNrasGEF|NRAPGEP|PDZ-GEF1|PDZGEF1|RA-GEF|RA-GEF-1|RAGEF|Rap-GEP|nRap GEP	Rap guanine nucleotide exchange factor 2	protein-coding
8931	chr5	178153625	178154383	+	25	NA	promoter-TSS (NM_001034833)	promoter-TSS (NM_001034833)	-44	NM_001034833	55651		NM_017838	ENSG00000145912	NHP2	DKCB2|NHP2P|NOLA2	NHP2 ribonucleoprotein	protein-coding
6674	chr6	109307945	109308920	+	25	NA	intron (NR_152435, intron 31 of 45)	intron (NR_152435, intron 31 of 45)	73307	NM_001346500	8763		NM_006016	ENSG00000135535	CD164	DFNA66|MGC-24|MGC-24v|MUC-24|endolyn	CD164 molecule	protein-coding
18142	chr10	69576938	69578967	+	25	NA	Intergenic	CpG	-4530	NM_020999	50674		NM_020999	ENSG00000122859	NEUROG3	Atoh5|Math4B|NGN-3|bHLHa7|ngn3	neurogenin 3	protein-coding
5682	chr1	22259453	22260023	+	25	NA	Intergenic	Intergenic	-6501	NR_039613	100616433		NR_039613	ENSG00000266564	MIR4418	-	microRNA 4418	ncRNA
8107	chr2	37349551	37350487	+	25	NA	intron (NM_012413, intron 1 of 6)	L2b|LINE|L2	5389	NM_012413	25797		NM_012413	ENSG00000115828	QPCT	GCT|QC|sQC	glutaminyl-peptide cyclotransferase	protein-coding
8339	chr4	7822962	7824088	+	25	NA	intron (NM_001371091, intron 7 of 17)	intron (NM_001371091, intron 7 of 17)	48783	NM_001371090	60312		NM_021638	ENSG00000196526	AFAP1	AFAP|AFAP-110|AFAP110	actin filament associated protein 1	protein-coding
8271	chr18	55589857	55590538	+	25	NA	promoter-TSS (NM_001243228)	promoter-TSS (NM_001243228)	-386	NM_001243227	6925		NM_003199	ENSG00000196628	TCF4	CDG2T|E2-2|FCD2|FECD3|ITF-2|ITF2|PTHS|SEF-2|SEF2|SEF2-1|SEF2-1A|SEF2-1B|SEF2-1D|TCF-4|bHLHb19	transcription factor 4	protein-coding
9375	chr7	127584752	127585828	+	25	NA	5' UTR (NM_024523, exon 1 of 2)	5' UTR (NM_024523, exon 1 of 2)	306	NM_024523	79571		NM_024523	ENSG00000179562	GCC1	GCC1P|GCC88	GRIP and coiled-coil domain containing 1	protein-coding
6960-2	chr16	16309329	16310119	+	25	NA	promoter-TSS (NR_036141).3	promoter-TSS (NR_036141).3	-151	NR_036141	100422870		NR_036141	ENSG00000265537	MIR3180-1	-	microRNA 3180-1	ncRNA
5441	chr1	41360350	41361394	+	25	NA	promoter-TSS (NM_001291281)	promoter-TSS (NM_001291281)	-562	NM_001291281	100132074		NM_001291281	ENSG00000204060	FOXO6	-	forkhead box O6	protein-coding
7158	chr12	90253724	90254349	+	25	NA	Intergenic	Intergenic	-39282	NR_135018	105369893		NR_135018	ENSG00000258183	LINC02392	-	long intergenic non-protein coding RNA 2392	ncRNA
5782	chr12	71754716	71755088	+	25	NA	promoter-TSS (NM_014999)	promoter-TSS (NM_014999)	39	NM_014999	23011		NM_014999	ENSG00000080371	RAB21	-	RAB21, member RAS oncogene family	protein-coding
9116	chr9	127660852	127661793	+	25	NA	intron (NM_001374306, intron 6 of 18)	intron (NM_001374306, intron 6 of 18)	29473	NR_037473	100500872		NR_037473	ENSG00000283874	MIR3911	mir-3911	microRNA 3911	ncRNA
5545	chr9	99175459	99176327	+	25	NA	Intergenic	Intergenic	46049	NR_024532	85365		NM_033087	ENSG00000119523	ALG2	CDG1I|CDGIi|CMS14|CMSTA3|NET38|hALPG2	ALG2 alpha-1,3/1,6-mannosyltransferase	protein-coding
7216	chr8	25251863	25253171	+	25	NA	intron (NM_024940, intron 2 of 51)	intron (NM_024940, intron 2 of 51)	67828	NM_001322810	80005		NM_024940	ENSG00000147459	DOCK5	-	dedicator of cytokinesis 5	protein-coding
5583	chr18	30632152	30632854	+	25	NA	Intergenic	MER52-int|LTR|ERV1	333593	NR_031684	100302131		NR_031684	ENSG00000283218	MIR302F	MIRN302F|hsa-mir-302f	microRNA 302f	ncRNA
5744	chr2	207792306	207792825	+	25	NA	Intergenic	MIR3|SINE|MIR	-22659	NM_003468	7855		NM_003468	ENSG00000163251	FZD5	C2orf31|HFZ5|MCOPCB11	frizzled class receptor 5	protein-coding
11609	chr9	128159423	128160951	+	25	NA	promoter-TSS (NM_024112)	promoter-TSS (NM_024112)	-78	NM_024112	79095		NM_024112	ENSG00000171159	BBLN	C9orf16|EST00098	bublin coiled coil protein	protein-coding
5961	chr4	182640730	182641342	+	25	NA	intron (NM_001080477, intron 5 of 27)	intron (NM_001080477, intron 5 of 27)	276217	NM_001351745	1635		NM_001921	ENSG00000129187	DCTD	-	dCMP deaminase	protein-coding
10666	chr16	49513928	49515134	+	24	NA	intron (NM_001379286, intron 7 of 7)	intron (NM_001379286, intron 7 of 7)	4054	NR_144553	1596		NR_144553	ENSG00000260089	ADAM3B	CYRN2	ADAM metallopeptidase domain 3B (pseudogene)	pseudo
7507	chr10	35416671	35417441	+	24	NA	intron (NM_001282853, intron 2 of 10)	intron (NM_001282853, intron 2 of 10)	80182	NM_001282852	219771		NM_145012	ENSG00000108100	CCNY	C10orf9|CBCP1|CCNX|CFP1	cyclin Y	protein-coding
5789	chr19	13609755	13610268	+	24	NA	Intergenic	Intergenic	-103532	NM_001127222	773		NM_000068	ENSG00000141837	CACNA1A	APCA|BI|CACNL1A4|CAV2.1|DEE42|EA2|EIEE42|FHM|HPCA|MHP|MHP1|SCA6	calcium voltage-gated channel subunit alpha1 A	protein-coding
7723	chr12	34022358	34023173	+	24	NA	exon (NM_032834, exon 1 of 3)	exon (NM_032834, exon 1 of 3)	269	NM_032834	84920		NM_032834	ENSG00000139133	ALG10	ALG10A|DIE2|KCR1	ALG10 alpha-1,2-glucosyltransferase	protein-coding
6047-2	chr16	1081217	1081830	+	24	NA	TTS (NM_001172560)	TTS (NM_001172560)	2697	NM_001053	6755		NM_001053	ENSG00000162009	SSTR5	SS-5-R|SST5	somatostatin receptor 5	protein-coding
7188-2	chrUn_GL000220v1	113248	113892	+	24	NA	non-coding (NR_003287, exon 1 of 1).2	non-coding (NR_003287, exon 1 of 1).2	222	NR_003287	100008589		NR_003287		RNA28SN5	RN28S1|RNA28S5	RNA, 28S ribosomal N5	rRNA
7431	chr19	48752463	48753410	+	24	NA	promoter-TSS (NM_001384359)	promoter-TSS (NM_001384359)	-295	NM_001384359	2523		NM_000148	ENSG00000174951	FUT1	H|HH|HSC	fucosyltransferase 1 (H blood group)	protein-coding
9984	chrX	155071354	155072179	+	24	NA	promoter-TSS (NM_001018025)	promoter-TSS (NM_001018025)	258	NM_001018055	79184		NM_024332	ENSG00000185515	BRCC3	BRCC36|C6.1A|CXorf53	BRCA1/BRCA2-containing complex subunit 3	protein-coding
7489	chr5	151447413	151448192	+	24	NA	5' UTR (NM_001308150, exon 1 of 11)	5' UTR (NM_001308150, exon 1 of 11)	199	NM_001308150	206358		NM_078483	ENSG00000123643	SLC36A1	Dct1|LYAAT1|PAT1|TRAMD3	solute carrier family 36 member 1	protein-coding
8476	chr12	51834399	51835202	+	24	NA	intron (NM_001384995, intron 1 of 1)	intron (NM_001384995, intron 1 of 1)	-2883	NM_001013690	401720		NM_001013690	ENSG00000261308	FIGNL2	-	fidgetin like 2	protein-coding
9108	chr9	132240530	132241612	+	24	NA	intron (NM_032536, intron 7 of 7)	CpG	79013	NM_032536	84628		NM_032536	ENSG00000196358	NTNG2	LHLL9381|Lmnt2|NEDBASH|NTNG1|NetrinG2|bA479K20.1	netrin G2	protein-coding
8795	chr3	69385836	69386753	+	24	NA	promoter-TSS (NM_015123)	promoter-TSS (NM_015123)	-206	NM_015123	23150		NM_015123	ENSG00000114541	FRMD4B	6030440G05Rik|GRSP1	FERM domain containing 4B	protein-coding
7599	chr17	37643215	37643718	+	24	NA	promoter-TSS (NM_007010).2	promoter-TSS (NM_007010).2	-20	NM_001291476	11056		NM_007010	ENSG00000278053	DDX52	HUSSY19|ROK1	DExD-box helicase 52	protein-coding
15718	chr11	116835665	116838052	+	24	NA	intron (NM_001318017, intron 3 of 3)	intron (NM_001318017, intron 3 of 3)	741	NR_126362	104326055		NR_126362	ENSG00000235910	APOA1-AS	-	APOA1 antisense RNA	ncRNA
7806	chr17	3048850	3049520	+	24	NA	Intergenic	Intergenic	14422	NM_014566	8386		NM_014566	ENSG00000262628	OR1D5	C17orf2|OR17-2|OR17-30|OR17-31|OR1D4	olfactory receptor family 1 subfamily D member 5	protein-coding
5561	chr11	10933855	10934319	+	24	NA	Intergenic	Intergenic	75870	NR_034137	729013		NR_034137	ENSG00000247271	ZBED5-AS1	-	ZBED5 antisense RNA 1	ncRNA
6753	chr7	79451997	79452840	+	24	NA	promoter-TSS (NR_038345)	promoter-TSS (NR_038345)	-539	NR_038345	100505881		NR_038343	ENSG00000234456	MAGI2-AS3	-	MAGI2 antisense RNA 3	ncRNA
7284	chr3	49803230	49803264	+	24	NA	promoter-TSS (NM_001366281)	promoter-TSS (NM_001366281)	-14	NM_001366281	389119		NM_203370	ENSG00000185614	INKA1	C3orf54|FAM212A|INCA	inka box actin regulator 1	protein-coding
8533	chr3	177609412	177610500	+	24	NA	intron (NR_047568, intron 2 of 3)	MER4D1|LTR|ERV1	168035	NR_047568	100505566		NR_047568	ENSG00000228221	LINC00578	-	long intergenic non-protein coding RNA 578	ncRNA
11611	chr9	90095122	90096627	+	24	NA	Intergenic	Intergenic	-54375	NR_038882	286370		NR_038882	ENSG00000227555	MIR4290HG	-	MIR4290 host gene	ncRNA
6885	chr8	16574959	16575510	+	24	NA	Intergenic	Intergenic	-382443	NM_138716	4481		NM_002445	ENSG00000038945	MSR1	CD204|SCARA1|SR-A|SR-AI|SR-AII|SR-AIII|SRA|phSR1|phSR2	macrophage scavenger receptor 1	protein-coding
9587	chr11	57315127	57315840	+	24	NA	intron (NM_033396, intron 4 of 11)	L2a|LINE|L2	9469	NM_033396	85456		NM_033396	ENSG00000149115	TNKS1BP1	CNOT12|TAB182	tankyrase 1 binding protein 1	protein-coding
5619	chr16	50741678	50742197	+	24	NA	promoter-TSS (NM_001378753)	promoter-TSS (NM_001378753)	-149	NM_001042355	1540		NM_015247	ENSG00000083799	CYLD	BRSS|CDMT|CYLD1|CYLDI|EAC|FTDALS8|MFT|MFT1|SBS|TEM|USPL2	CYLD lysine 63 deubiquitinase	protein-coding
7944	chr22_KI270879v1_alt	149739	150666	+	24	NA	Intergenic	CpG	-14910	NR_038911	284889		NR_038911		MIF-AS1	MIF-AS	MIF antisense RNA 1	ncRNA
8988	chr3	179347373	179348157	+	24	NA	promoter-TSS (NM_033540)	promoter-TSS (NM_033540)	56	NM_033540	55669		NM_017927	ENSG00000171109	MFN1	hfzo1|hfzo2	mitofusin 1	protein-coding
11090	chr7	102477963	102479599	+	24	NA	non-coding (NR_163857, exon 1 of 4)	non-coding (NR_163857, exon 1 of 4)	141	NR_163857	5439		NM_006234	ENSG00000005075	POLR2J	POLR2J1|RPB11|RPB11A|RPB11m|hRPB14	RNA polymerase II subunit J	protein-coding
6516	chr5	151268585	151269241	+	24	NA	3' UTR (NM_000405, exon 4 of 4)	3' UTR (NM_000405, exon 4 of 4)	15728	NM_001167607	2760		NM_000405	ENSG00000196743	GM2A	GM2-AP|GM2AP|SAP-3	ganglioside GM2 activator	protein-coding
9385	chr18	12419724	12420554	+	24	NA	promoter-TSS (NM_001142406)	promoter-TSS (NM_001142406)	-50	NM_001142406	10650		NM_006553	ENSG00000141391	PRELID3A	C18orf43|HFL-EDDG1|SLMO1	PRELI domain containing 3A	protein-coding
12557	chr19	4970238	4972092	+	24	NA	intron (NM_001370093, intron 1 of 11)	intron (NM_001370093, intron 1 of 11)	2052	NM_015015	23030		NM_015015	ENSG00000127663	KDM4B	JMJD2B|MRD65|TDRD14B	lysine demethylase 4B	protein-coding
6401	chr1	52348665	52349310	+	24	NA	Intergenic	Intergenic	17218	NM_001330585	200014		NM_032449	ENSG00000154222	CC2D1B	Lgd1	coiled-coil and C2 domain containing 1B	protein-coding
9098	chr19	2968301	2969774	+	23	NA	Intergenic	AluSz6|SINE|Alu	-8527	NR_138612	79816		NM_024760	ENSG00000104953	TLE6	GRG6|OZEMA15|PREMBL	TLE family member 6, subcortical maternal complex member	protein-coding
5845	chr9	99104396	99105157	+	23	NA	promoter-TSS (NM_001306210)	promoter-TSS (NM_001306210)	-337	NM_001306210	7046		NM_004612	ENSG00000106799	TGFBR1	AAT5|ACVRLK4|ALK-5|ALK5|ESS1|LDS1|LDS1A|LDS2A|MSSE|SKR4|TBR-i|TBRI|TGFR-1|tbetaR-I	transforming growth factor beta receptor 1	protein-coding
7988	chr17	30831469	30832432	+	23	NA	promoter-TSS (NM_024857)	promoter-TSS (NM_024857)	-16	NM_024857	79915		NM_024857	ENSG00000176208	ATAD5	C17orf41|ELG1|FRAG1	ATPase family AAA domain containing 5	protein-coding
5759-2	chr2	218909018	218909696	+	23	NA	intron (NR_110238, intron 3 of 4)	CpG	21280	NR_110238	101928537		NR_110238	ENSG00000228135	LINC01494	-	long intergenic non-protein coding RNA 1494	ncRNA
8588	chr17	76173503	76174613	+	23	NA	intron (NM_052916, intron 2 of 18)	intron (NM_052916, intron 2 of 18)	-32813	NM_001454	2302		NM_001454	ENSG00000129654	FOXJ1	CILD43|FKHL13|HFH-4|HFH4	forkhead box J1	protein-coding
5799	chr1	31155217	31155683	+	23	NA	Intergenic	CpG	84437	NM_024522	79570		NM_024522	ENSG00000084628	NKAIN1	FAM77C	sodium/potassium transporting ATPase interacting 1	protein-coding
9722	chr13	100673023	100674187	+	23	NA	intron (NM_001350576, intron 1 of 18)	intron (NM_001350576, intron 1 of 18)	1190	NM_001350572	84899		NM_032813	ENSG00000125247	TMTC4	DFNB122	transmembrane O-mannosyltransferase targeting cadherins 4	protein-coding
15402	chr1	154405540	154406468	+	23	NA	intron (NM_001206866, intron 1 of 6)	intron (NM_001206866, intron 1 of 6)	560	NR_147855	101928101		NR_147855	ENSG00000228013	IL6R-AS1	-	IL6R antisense RNA 1	ncRNA
7129	chr1	16702886	16704269	+	23	NA	intron (NR_026567, intron 5 of 10)	intron (NR_026567, intron 5 of 10)	16580	NR_026567	284729		NR_026567		ESPNP	dJ1182A14.1	espin pseudogene	pseudo
6525	chr20	36951434	36952366	+	23	NA	promoter-TSS (NM_015474)	promoter-TSS (NM_015474)	-192	NM_001363733	25939		NM_015474	ENSG00000101347	SAMHD1	CHBL2|DCIP|HDDC1|MOP-5|SBBI88|hSAMHD1	SAM and HD domain containing deoxynucleoside triphosphate triphosphohydrolase 1	protein-coding
12084	chr1	63366969	63368318	+	23	NA	promoter-TSS (NM_013339)	promoter-TSS (NM_013339)	16	NM_013339	29929		NM_013339	ENSG00000088035	ALG6	CDG1C	ALG6 alpha-1,3-glucosyltransferase	protein-coding
7547	chr3	85503921	85504988	+	23	NA	promoter-TSS (NM_001256505)	promoter-TSS (NM_001256505)	-162	NM_001256503	253559		NM_153184	ENSG00000175161	CADM2	IGSF4D|NECL3|Necl-3|SynCAM 2|SynCAM-2|synCAM2	cell adhesion molecule 2	protein-coding
7053	chr4	90128218	90128818	+	23	NA	intron (NM_001145065, intron 1 of 10)	CpG	1124	NM_001145065	401145		NM_207491	ENSG00000184305	CCSER1	FAM190A	coiled-coil serine rich protein 1	protein-coding
7267	chr4	38094178	38094841	+	23	NA	intron (NM_015173, intron 13 of 19)	intron (NM_015173, intron 13 of 19)	-15672	NM_001253913	23216		NM_015173	ENSG00000065882	TBC1D1	TBC|TBC1	TBC1 domain family member 1	protein-coding
8278	chr9	129823716	129824562	+	23	NA	promoter-TSS (NM_000113)	promoter-TSS (NM_000113)	-3	NM_000113	1861		NM_000113	ENSG00000136827	TOR1A	AMC5|DQ2|DYT1	torsin family 1 member A	protein-coding
5278	chr20	33562076	33562562	+	23	NA	promoter-TSS (NM_001039709)	promoter-TSS (NM_001039709)	-46	NM_001039709	9139		NM_005093	ENSG00000078699	CBFA2T2	EHT|MTGR1|ZMYND3|p85	CBFA2/RUNX1 partner transcriptional co-repressor 2	protein-coding
7814	chr8	140511779	140512387	+	23	NA	promoter-TSS (NR_040712)	promoter-TSS (NR_040712)	87	NR_040712	54108		NM_017444	ENSG00000104472	CHRAC1	CHARC1|CHARC15|CHRAC-1|CHRAC-15|CHRAC15|YCL1	chromatin accessibility complex subunit 1	protein-coding
13624	chr6	170437357	170439465	+	23	NA	Intergenic	Intergenic	107650	NR_039787	100616430		NR_039787	ENSG00000266245	MIR4644	-	microRNA 4644	ncRNA
6510	chr1	54274441	54275161	+	23	NA	intron (NM_145716, intron 5 of 17)	L2b|LINE|L2	38358	NR_103541	619518		NM_001034847	ENSG00000198711	SSBP3-AS1	C1orf191|MST128|MSTP128	SSBP3 antisense RNA 1	ncRNA
8048	chr12	51537077	51537944	+	23	NA	Intergenic	Intergenic	-53723	NM_014191	6334		NM_014191	ENSG00000196876	SCN8A	BFIS5|CERIII|CIAT|DEE13|EIEE13|MED|MYOCL2|NaCh6|Nav1.6|PN4	sodium voltage-gated channel alpha subunit 8	protein-coding
7600	chr5	73820135	73821312	+	23	NA	intron (NM_001244364, intron 1 of 27)	intron (NM_001244364, intron 1 of 27)	7177	NM_001244364	64283		NM_022448	ENSG00000214944	ARHGEF28	RGNEF|RIP2|p190RHOGEF	Rho guanine nucleotide exchange factor 28	protein-coding
6297	chr7	131456377	131457214	+	23	NA	intron (NM_001145354, intron 13 of 18)	L1MEh|LINE|L1	99833	NM_005397	5420		NM_005397	ENSG00000128567	PODXL	Gp200|PC|PCLP|PCLP-1|PDX|PODXL1|gp135	podocalyxin like	protein-coding
10572	chr2	21330643	21331552	+	23	NA	Intergenic	MER89|LTR|ERV1	207129	NM_001306137	100129278		NM_001306137	ENSG00000218819	TDRD15	-	tudor domain containing 15	protein-coding
6640	chr6	70566465	70567324	+	23	NA	promoter-TSS (NM_145267)	promoter-TSS (NM_145267)	-36	NM_145267	135154		NM_145267	ENSG00000154079	SDHAF4	C6orf57|Sdh8	succinate dehydrogenase complex assembly factor 4	protein-coding
9175	chr21	35205399	35206782	+	23	NA	Intergenic	Intergenic	-156788	NM_001754	861		NM_001754	ENSG00000159216	RUNX1	AML1|AML1-EVI-1|AMLCR1|CBF2alpha|CBFA2|EVI-1|PEBP2aB|PEBP2alpha	RUNX family transcription factor 1	protein-coding
9504	chr10	96512632	96514146	+	23	NA	intron (NM_012465, intron 1 of 20)	CpG	537	NM_012465	7093		NM_012465	ENSG00000095587	TLL2	-	tolloid like 2	protein-coding
12688	chr20	20546927	20548186	+	23	NA	intron (NM_020343, intron 23 of 39)	intron (NM_020343, intron 23 of 39)	165088	NM_020343	57186		NM_020343	ENSG00000188559	RALGAPA2	AS250|C20orf74|bA287B20.1|dJ1049G11|dJ1049G11.4|p220	Ral GTPase activating protein catalytic subunit alpha 2	protein-coding
5408-2	chr8	58858250	58858839	+	23	NA	intron (NM_014729, intron 3 of 8)	intron (NM_014729, intron 3 of 8)	-198691	NM_003580	8439		NM_003580	ENSG00000035681	NSMAF	FAN|GRAMD5	neutral sphingomyelinase activation associated factor	protein-coding
7236	chr4	498931	499488	+	23	NA	promoter-TSS (NM_001345994)	promoter-TSS (NM_001345994)	-1	NM_001345989	54872		NM_017733	ENSG00000174227	PIGG	EMM|GPI7|LAS21|MRT53|NEDHSCA|PRO4405|RLGS1930	phosphatidylinositol glycan anchor biosynthesis class G (EMM blood group)	protein-coding
7276	chr11	1824554	1825656	+	23	NA	Intergenic	Intergenic	-9322	NM_001290332	90019		NM_138567	ENSG00000149043	SYT8	-	synaptotagmin 8	protein-coding
7612	chr8	142568038	142568909	+	23	NA	Intergenic	Intergenic	46006	NM_015193	23237		NM_015193	ENSG00000198576	ARC	Arg3.1|hArc	activity regulated cytoskeleton associated protein	protein-coding
6863	chr11	117704515	117705142	+	23	NA	intron (NM_020693, intron 3 of 32)	intron (NM_020693, intron 3 of 32)	92388	NM_020693	57453		NM_020693	ENSG00000177103	DSCAML1	DSCAM2	DS cell adhesion molecule like 1	protein-coding
6213-2	chr15	75274128	75274913	+	23	NA	Intergenic	Intergenic	-8321	NM_001145224	653643		NM_001145224	ENSG00000140478	GOLGA6D	-	golgin A6 family member D	protein-coding
6430	chr14	103524193	103524808	+	22	NA	Intergenic	Intergenic	-1670	NM_001823	1152		NM_001823	ENSG00000166165	CKB	B-CK|BCK|CKBB|CPK-B|HEL-211|HEL-S-29	creatine kinase B	protein-coding
6379	chr5	32312033	32312671	+	22	NA	intron (NM_001294344, intron 1 of 13)	CpG	587	NM_001294343	54545		NM_019061	ENSG00000150712	MTMR12	3-PAP|PIP3AP	myotubularin related protein 12	protein-coding
5528-3	chr21	44338101	44338649	+	22	NA	promoter-TSS (NM_001271442)	promoter-TSS (NM_001271442)	-37	NM_001271442	755		NM_004928	ENSG00000160226	CFAP410	C21orf2|LRRC76|RDMS|SMDAX|YF5/A2	cilia and flagella associated protein 410	protein-coding
6977	chr2	10122512	10123137	+	22	NA	promoter-TSS (NM_001034)	promoter-TSS (NM_001034)	85	NM_001034	6241		NM_001034	ENSG00000171848	RRM2	C2orf48|R2|RR2|RR2M	ribonucleotide reductase regulatory subunit M2	protein-coding
5614	chr1	44786037	44786862	+	22	NA	intron (NM_153274, intron 3 of 8)	CpG	1721	NM_153274	266675		NM_153274	ENSG00000142959	BEST4	VMD2L2	bestrophin 4	protein-coding
5563-2	chr8	98825120	98825736	+	22	NA	intron (NM_001256312, intron 3 of 12)	CpG	243	NM_001256313	6788		NM_006281	ENSG00000104375	STK3	KRS1|MST2	serine/threonine kinase 3	protein-coding
8982	chr1	15423922	15425205	+	22	NA	intron (NM_024329, intron 1 of 3)	intron (NM_024329, intron 1 of 3)	-13880	NM_007272	11330		NM_007272	ENSG00000162438	CTRC	CLCR|ELA4	chymotrypsin C	protein-coding
6820	chr8	37478850	37479952	+	22	NA	intron (NR_121620, intron 1 of 6)	intron (NR_121620, intron 1 of 6)	14512	NR_121620	100507420		NR_121620	ENSG00000253414	LINC01605	LincDUSP|ODIR1	long intergenic non-protein coding RNA 1605	ncRNA
10012	chr1	84479158	84480273	+	22	NA	intron (NM_025065, intron 1 of 8)	intron (NM_025065, intron 1 of 8)	449	NM_025065	80135		NM_025065	ENSG00000117133	RPF1	BXDC5	ribosome production factor 1 homolog	protein-coding
7132	chr2	101654511	101655780	+	22	NA	Intergenic	Intergenic	-42558	NM_145686	9448		NM_004834	ENSG00000071054	MAP4K4	FLH21957|HEL-S-31|HGK|MEKKK4|NIK	mitogen-activated protein kinase kinase kinase kinase 4	protein-coding
7507-2	chr3	63945541	63946236	+	22	NA	intron (NM_001177387, intron 3 of 12)	L2a|LINE|L2	-21906	NM_001128149	6314		NM_000333	ENSG00000163635	ATXN7	ADCAII|OPCA3|SCA7|SGF73	ataxin 7	protein-coding
6810	chr1	23777848	23778338	+	22	NA	promoter-TSS (NM_020362)	promoter-TSS (NM_020362)	204	NR_038280	100506963		NR_038280	ENSG00000236810	ELOA-AS1	TCEB3-AS1	ELOA antisense RNA 1	ncRNA
8369	chr5	74916624	74917458	+	22	NA	Intergenic	MSTD|LTR|ERVL-MaLR	-50075	NM_015566	26049		NM_015566	ENSG00000198780	FAM169A	SLAP|SLAP75	family with sequence similarity 169 member A	protein-coding
7207	chr3	190455715	190456345	+	22	NA	Intergenic	Intergenic	-6154	NM_207316	131920		NM_207316	ENSG00000198398	TMEM207	UNQ846	transmembrane protein 207	protein-coding
8298	chr22	24632485	24634101	+	22	NA	non-coding (NR_024494, exon 1 of 7)	non-coding (NR_024494, exon 1 of 7)	378	NR_024494	644165		NR_024494		BCRP3	BCR3|BCRL3|BCRL6	BCR pseudogene 3	pseudo
7327	chr18	64993863	64995178	+	22	NA	Intergenic	Intergenic	-734465	NR_033983	400654		NR_033983	ENSG00000266952	LINC01538	-	long intergenic non-protein coding RNA 1538	ncRNA
8325	chr8	144315371	144316521	+	22	NA	3' UTR (NM_012079, exon 17 of 17)	3' UTR (NM_012079, exon 17 of 17)	1369	NR_106907	102465511		NR_106907	ENSG00000284229	MIR6848	hsa-mir-6848	microRNA 6848	ncRNA
12047	chr3	45553439	45555641	+	22	NA	Intergenic	Intergenic	-40211	NM_014240	8994		NM_014240	ENSG00000144791	LIMD1	-	LIM domain containing 1	protein-coding
8310	chr8	144326631	144327598	+	22	NA	promoter-TSS (NM_012079)	promoter-TSS (NM_012079)	-262	NM_012079	8694		NM_012079	ENSG00000185000	DGAT1	ARAT|ARGP1|DGAT|DIAR7	diacylglycerol O-acyltransferase 1	protein-coding
8827	chr2	62536631	62537704	+	22	NA	Intergenic	L2b|LINE|L2	-30972	NM_198276	200728		NM_198276	ENSG00000186889	TMEM17	-	transmembrane protein 17	protein-coding
5999	chr22	32532053	32532661	+	22	NA	intron (NM_133633, intron 9 of 11)	intron (NM_133633, intron 9 of 11)	57120	NM_001257990	25793		NM_012179	ENSG00000100225	FBXO7	FBX|FBX07|FBX7|PARK15|PKPS	F-box protein 7	protein-coding
5508	chr11	123137193	123138091	+	22	NA	intron (NM_024769, intron 1 of 6)	(GCAGGCT)n|Simple_repeat|Simple_repeat	57606	NM_024769	79827		NM_024769	ENSG00000166250	CLMP	ACAM|ASAM|CSBM|CSBS	CXADR like membrane protein	protein-coding
6085	chr15	62935416	62935981	+	22	NA	Intergenic	LTR33|LTR|ERVL	-107049	NM_000366	7168		NM_000366	ENSG00000140416	TPM1	C15orf13|CMD1Y|CMH3|HEL-S-265|HTM-alpha|LVNC9|TMSA	tropomyosin 1	protein-coding
10609	chr17	74379199	74380114	+	22	NA	Intergenic	Intergenic	12150	NM_181790	350383		NM_181790	ENSG00000257008	GPR142	GPRg1b|PGR2	G protein-coupled receptor 142	protein-coding
15310	chr6	20705660	20707460	+	22	NA	intron (NM_017774, intron 5 of 15)	intron (NM_017774, intron 5 of 15)	172103	NM_017774	54901		NM_017774	ENSG00000145996	CDKAL1	-	CDK5 regulatory subunit associated protein 1 like 1	protein-coding
5223-2	chr17	48908790	48909550	+	22	NA	promoter-TSS (NR_135674)	promoter-TSS (NR_135674)	-187	NR_135674	105371814		NR_135674	ENSG00000293025	LOC105371814	-	uncharacterized LOC105371814	ncRNA
8507	chr7	101386160	101387328	+	22	NA	intron (NM_133457, intron 1 of 12)	intron (NM_133457, intron 1 of 12)	23869	NM_001278563	136227		NM_133457	ENSG00000160963	COL26A1	EMI6|EMID2|EMU2|SH2B	collagen type XXVI alpha 1 chain	protein-coding
6364	chr7	1713502	1714168	+	22	NA	intron (NM_001128636, intron 2 of 2)	CpG	25716	NM_001128636	392617		NM_001128636	ENSG00000225968	ELFN1	PPP1R28	extracellular leucine rich repeat and fibronectin type III domain containing 1	protein-coding
5938	chr1	50967972	50968649	+	22	NA	promoter-TSS (NM_001262)	promoter-TSS (NM_001262)	-385	NM_001262	1031		NM_001262	ENSG00000123080	CDKN2C	INK4C|p18|p18-INK4C	cyclin dependent kinase inhibitor 2C	protein-coding
5375	chr3	157503124	157503684	+	22	NA	promoter-TSS (NM_001167911)	promoter-TSS (NM_001167911)	12	NM_001167911	79674		NM_024621	ENSG00000197415	VEPH1	MELT|VEPH	ventricular zone expressed PH domain containing 1	protein-coding
6943-2	chr5	71289191	71289825	+	22	NA	intron (NR_146391, intron 1 of 9)	LTR12E|LTR|ERV1	331	NR_146391	653080		NR_146391		GUSBP16	-	GUSB pseudogene 16	pseudo
7700	chr10	82470307	82471271	+	22	NA	intron (NM_001370081, intron 2 of 8)	intron (NM_001370081, intron 2 of 8)	-237869	NR_120666	101929590		NR_120666	ENSG00000225738	NRG3-AS1	C10orf100|Em:AC010157.1	NRG3 antisense RNA 1	ncRNA
5402	chr12	91974465	91975139	+	22	NA	Intergenic	MamRep605|LTR?|LTR?	166911	NR_046159	256021		NM_001256373	ENSG00000257242	LINC01619	C12orf79	long intergenic non-protein coding RNA 1619	ncRNA
7480	chr14	69710756	69711598	+	22	NA	3' UTR (NM_014734, exon 6 of 6)	3' UTR (NM_014734, exon 6 of 6)	-55965	NM_001320214	6430		NM_006925	ENSG00000100650	SRSF5	HRS|SFRS5|SRP40	serine and arginine rich splicing factor 5	protein-coding
5369	chr20	33443647	33444250	+	22	NA	promoter-TSS (NM_003098)	promoter-TSS (NM_003098)	-185	NM_003098	6640		NM_003098	ENSG00000101400	SNTA1	LQT12|SNT1|TACIP1|dJ1187J4.5	syntrophin alpha 1	protein-coding
6190	chr9	130731991	130732678	+	22	NA	intron (NM_007313, intron 1 of 10)	intron (NM_007313, intron 1 of 10)	18453	NM_007313	25		NM_005157	ENSG00000097007	ABL1	ABL|BCR-ABL|CHDSKM|JTK7|bcr/abl|c-ABL|c-ABL1|p150|v-abl	ABL proto-oncogene 1, non-receptor tyrosine kinase	protein-coding
6963	chr19	13951757	13952767	+	22	NA	promoter-TSS (NM_138353)	promoter-TSS (NM_138353)	-212	NM_138353	90379		NM_138353	ENSG00000132017	DCAF15	C19orf72	DDB1 and CUL4 associated factor 15	protein-coding
6925	chr17	74368379	74369115	+	22	NA	intron (NM_001331076, intron 1 of 3)	intron (NM_001331076, intron 1 of 3)	1241	NM_181790	350383		NM_181790	ENSG00000257008	GPR142	GPRg1b|PGR2	G protein-coupled receptor 142	protein-coding
6941	chr7	82559251	82559869	+	22	NA	Intergenic	Intergenic	-115604	NM_001366867	781		NM_000722	ENSG00000153956	CACNA2D1	CACNA2|CACNL2A|CCHL2A|DEE110|LINC01112|lncRNA-N3	calcium voltage-gated channel auxiliary subunit alpha2delta 1	protein-coding
9945	chrX	40379680	40380534	+	22	NA	Intergenic	L2|LINE|L2	117190	NR_110386	101927476		NR_110386	ENSG00000236393	LINC03099	-	long intergenic non-protein coding RNA 3099	ncRNA
7875	chr10	6300191	6301336	+	22	NA	Intergenic	Intergenic	-25781	NR_040079	399715		NR_040079	ENSG00000215244	LINC02649	-	long intergenic non-protein coding RNA 2649	ncRNA
6796	chr8	29080683	29081593	+	22	NA	intron (NM_015254, intron 37 of 39)	intron (NM_015254, intron 37 of 39)	181932	NM_015254	23303		NM_015254	ENSG00000197892	KIF13B	GAKIN	kinesin family member 13B	protein-coding
8756	chr1	59637671	59638752	+	22	NA	intron (NM_001244714, intron 8 of 13)	intron (NM_001244714, intron 8 of 13)	95085	NR_039861	100616409		NR_039861	ENSG00000266150	MIR4711	-	microRNA 4711	ncRNA
9117	chr14	60161324	60162347	+	22	NA	intron (NM_001322280, intron 1 of 6)	L2b|LINE|L2	3563	NM_016029	51635		NM_016029	ENSG00000100612	DHRS7	CGI-86|SDR34C1|retDSR4|retSDR4	dehydrogenase/reductase 7	protein-coding
13494	chr15	74311880	74313376	+	22	NA	intron (NM_025055, intron 11 of 18)	intron (NM_025055, intron 11 of 18)	-5931	NM_001287181	80125		NM_025055	ENSG00000140481	CCDC33	CC2D3|CT61|HP11097	coiled-coil domain containing 33	protein-coding
7260	chr7	76983930	76984904	+	21	NA	intron (NR_023383, intron 1 of 10)	intron (NR_023383, intron 1 of 10)	3595	NR_023383	441263		NR_023383	ENSG00000265479	DTX2P1-UPK3BP1-PMS2P11	PMS2L11	DTX2P1-UPK3BP1-PMS2P11 readthrough, transcribed pseudogene	pseudo
7970	chr19	16262162	16263080	+	21	NA	Intergenic	Intergenic	-62205	NM_016270	10365		NM_006075	ENSG00000127528	KLF2	LKLF	KLF transcription factor 2	protein-coding
7807	chr11	75553827	75554833	+	21	NA	Intergenic	Intergenic	-7923	NM_001235	871		NM_001235	ENSG00000149257	SERPINH1	AsTP3|CBP1|CBP2|HSP47|OI10|PIG14|PPROM|RA-A47|SERPINH2|gp46	serpin family H member 1	protein-coding
5543	chr12	45284130	45284911	+	21	NA	intron (NM_001204803, intron 2 of 20)	MER39B|LTR|ERV1	-8170	NM_001142678	196527		NM_001025356	ENSG00000177119	ANO6	BDPLT7|SCTS|TMEM16F	anoctamin 6	protein-coding
8691	chrX	101097703	101098418	+	21	NA	promoter-TSS (NM_001318521)	promoter-TSS (NM_001318521)	-122	NM_001318521	2491		NM_006733	ENSG00000102384	CENPI	CENP-I|FSHPRH1|LRPR1	centromere protein I	protein-coding
6923	chr19	57410825	57411706	+	21	NA	5' UTR (NM_001330617, exon 1 of 4)	5' UTR (NM_001330617, exon 1 of 4)	104	NM_001330617	7565		NM_006959	ENSG00000186272	ZNF17	HPF3|KOX10	zinc finger protein 17	protein-coding
12271	chr1	203638246	203640018	+	21	NA	intron (NM_001365784, intron 1 of 20)	intron (NM_001365784, intron 1 of 20)	11195	NM_001365784	493		NM_001684	ENSG00000058668	ATP2B4	ATP2B2|MXRA1|PMCA4|PMCA4b|PMCA4x	ATPase plasma membrane Ca2+ transporting 4	protein-coding
5630	chr20	42051731	42052550	+	21	NA	Intergenic	Intergenic	-433763	NM_032221	84181		NM_032221	ENSG00000124177	CHD6	CHD-6|CHD5|RIGB	chromodomain helicase DNA binding protein 6	protein-coding
8047-2	chr9	38029500	38030484	+	21	NA	intron (NM_003028, intron 1 of 5)	intron (NM_003028, intron 1 of 5)	39235	NM_003028	6461		NM_003028	ENSG00000107338	SHB	bA3J10.2	SH2 domain containing adaptor protein B	protein-coding
5759	chr14	33052938	33053492	+	21	NA	intron (NM_173159, intron 1 of 11)	intron (NM_173159, intron 1 of 11)	114336	NM_001164749	64067		NM_022123	ENSG00000151322	NPAS3	MOP6|PASD6|bHLHe12	neuronal PAS domain protein 3	protein-coding
6622	chr2	205739441	205740245	+	21	NA	intron (NM_201264, intron 7 of 8)	intron (NM_201264, intron 7 of 8)	57342	NM_018534	8828		NM_003872	ENSG00000118257	NRP2	NP2|NPN2|PRO2714|VEGF165R2	neuropilin 2	protein-coding
5431	chr9	39464251	39464720	+	21	NA	promoter-TSS (NR_003528)	promoter-TSS (NR_003528)	41	NR_003528	401509		NM_001032297		ZNF658B	-	zinc finger protein 658B (pseudogene)	pseudo
5320	chr7	96075272	96075916	+	21	NA	intron (NM_004411, intron 14 of 16)	intron (NM_004411, intron 14 of 16)	144162	NR_030322	693176		NR_030322	ENSG00000208025	MIR591	MIRN591|hsa-mir-591	microRNA 591	ncRNA
6273-2	chr2	101655995	101656613	+	21	NA	Intergenic	Intergenic	-41399	NM_145686	9448		NM_004834	ENSG00000071054	MAP4K4	FLH21957|HEL-S-31|HGK|MEKKK4|NIK	mitogen-activated protein kinase kinase kinase kinase 4	protein-coding
5430	chr2	28691482	28692188	+	21	NA	Intergenic	Intergenic	44370	NR_145832	100505774		NR_145832	ENSG00000226833	LOC100505774	-	uncharacterized LOC100505774	ncRNA
5581	chr10	112741869	112742778	+	21	NA	intron (NM_001365713, intron 8 of 8)	intron (NM_001365713, intron 8 of 8)	-81173	NR_120684	103344931		NR_120684	ENSG00000260917	LOC103344931	-	uncharacterized LOC103344931	ncRNA
5824	chr4	184746960	184747606	+	21	NA	Intergenic	Intergenic	-13187	NM_024629	79682		NM_024629	ENSG00000151725	CENPU	CENP50|CENPU50|KLIP1|MLF1IP|PBIP1	centromere protein U	protein-coding
9568	chr11	837800	839489	+	21	NA	3' UTR (NM_004357, exon 9 of 9)	3' UTR (NM_004357, exon 9 of 9)	3885	NM_021128	5441		NM_021128	ENSG00000177700	POLR2L	RBP10|RPABC5|RPB10|RPB10beta|RPB7.6|hRPB7.6	RNA polymerase II, I and III subunit L	protein-coding
7379	chr17	42107590	42108319	+	21	NA	intron (NM_024119, intron 7 of 13)	CpG-11145	4760	NM_024119	79132		NM_024119	ENSG00000108771	DHX58	D11LGP2|D11lgp2e|LGP2|RLR-3	DExH-box helicase 58	protein-coding
6740	chr16	30395615	30396452	+	21	NA	intron (NM_001214906, intron 2 of 2)	intron (NM_001214906, intron 2 of 2)	613	NM_001214909	197407		NM_152652	ENSG00000180035	ZNF48	ZNF553	zinc finger protein 48	protein-coding
10017	chr20	16028369	16029608	+	21	NA	intron (NM_001351661, intron 15 of 17)	MLT1A|LTR|ERVL-MaLR	-43106	NR_130924	613266		NR_130924	ENSG00000286546	LOC613266	-	uncharacterized LOC613266	ncRNA
5209	chr12	53727352	53728211	+	21	NA	promoter-TSS (NR_026554)	promoter-TSS (NR_026554)	-329	NM_020898	57658		NM_020898	ENSG00000012822	CALCOCO1	Cocoa|PP13275|calphoglin	calcium binding and coiled-coil domain 1	protein-coding
5665	chr6	53119594	53120470	+	21	NA	Intergenic	Intergenic	28809	NM_003643	8521		NM_003643	ENSG00000137270	GCM1	GCMA|hGCMa	glial cells missing transcription factor 1	protein-coding
6166-2	chr4	169612193	169612968	+	21	NA	promoter-TSS (NM_001374423)	promoter-TSS (NM_001374423)	3	NM_001199399	4750		NM_012224	ENSG00000137601	NEK1	ALS24|NY-REN-55|OFD2|SRPS2|SRPS2A|SRTD6	NIMA related kinase 1	protein-coding
7769	chr19	18798486	18799441	+	21	NA	Intergenic	L2b|LINE|L2	-7658	NM_000095	1311		NM_000095	ENSG00000105664	COMP	CTS2|EDM1|EPD1|MED|PSACH|THBS5|TSP-5|TSP5	cartilage oligomeric matrix protein	protein-coding
5745	chr2	101804643	101804651	+	21	NA	intron (NM_001384572, intron 2 of 29)	intron (NM_001384572, intron 2 of 29)	106382	NM_001384567	9448		NM_004834	ENSG00000071054	MAP4K4	FLH21957|HEL-S-31|HGK|MEKKK4|NIK	mitogen-activated protein kinase kinase kinase kinase 4	protein-coding
10495	chr12	57523047	57524968	+	21	NA	intron (NM_052897, intron 1 of 12)	intron (NM_052897, intron 1 of 12)	1183	NM_052897	114785		NM_052897	ENSG00000166987	MBD6	-	methyl-CpG binding domain protein 6	protein-coding
8592	chr18	57471558	57472843	+	21	NA	intron (NM_004852, intron 1 of 1)	intron (NM_004852, intron 1 of 1)	36826	NM_004852	9480		NM_004852	ENSG00000119547	ONECUT2	OC-2|OC2	one cut homeobox 2	protein-coding
6423	chr1	118184782	118185858	+	21	NA	promoter-TSS (NM_206996)	promoter-TSS (NM_206996)	-92	NM_206996	200162		NM_206996	ENSG00000155761	SPAG17	CT143|PF6|SPGF55	sperm associated antigen 17	protein-coding
5979	chr5	151267544	151268316	+	21	NA	3' UTR (NM_000405, exon 4 of 4)	3' UTR (NM_000405, exon 4 of 4)	14745	NM_001167607	2760		NM_000405	ENSG00000196743	GM2A	GM2-AP|GM2AP|SAP-3	ganglioside GM2 activator	protein-coding
7337	chr7	116862481	116863322	+	21	NA	intron (NM_006136, intron 1 of 9)	CpG	314	NM_006136	830		NM_006136	ENSG00000198898	CAPZA2	CAPPA2|CAPZ	capping actin protein of muscle Z-line subunit alpha 2	protein-coding
10176	chr1	225845625	225846498	+	21	NA	TTS (NM_001136018)	TTS (NM_001136018)	20707	NM_001378428	2052		NM_000120	ENSG00000143819	EPHX1	EPHX|EPOX|HYL1|MEH	epoxide hydrolase 1	protein-coding
5457	chr11	106470068	106470923	+	21	NA	Intergenic	Intergenic	219088	NR_120551	101928535		NR_120551	ENSG00000290498	LOC101928535	-	uncharacterized LOC101928535	ncRNA
5606	chr16	11635906	11637084	+	21	NA	Intergenic	LTR9A1|LTR|ERV1	-31960	NM_003498	8303		NM_003498	ENSG00000184602	SNN	-	stannin	protein-coding
7915	chr11	46438227	46439041	+	21	NA	intron (NR_160027, intron 11 of 18)	intron (NR_160027, intron 11 of 18)	-13173	NR_036118	100422825		NR_036118	ENSG00000283497	MIR3160-2	mir-3160-2	microRNA 3160-2	ncRNA
5945-2	chr9	127608163	127608786	+	21	NA	Intergenic	CpG	-3438	NM_001374309	6812		NM_003165	ENSG00000136854	STXBP1	DEE4|MUNC18-1|N-Sec1|NSEC1|P67|RBSEC1|UNC18|unc-18A|unc18-1	syntaxin binding protein 1	protein-coding
8494-2	chr19_GL383573v1_alt	363704	364728	+	21	NA	Intergenic	Intergenic	97687	NM_001256173	7639		NM_003429	ENSG00000105750	ZNF85	HPF4|HTF1	zinc finger protein 85	protein-coding
6085-2	chr22	37657929	37658771	+	21	NA	promoter-TSS (NM_020315)	promoter-TSS (NM_020315)	27	NR_109952	101927051		NR_109952	ENSG00000233360	PDXP-DT	-	PDXP divergent transcript	ncRNA
7183	chr10	38356069	38356659	+	21	NA	promoter-TSS (NR_003086)	promoter-TSS (NR_003086)	-16	NR_003086	158160		NM_182829	ENSG00000290439	HSD17B7P2	HSD17B7|Hsd17b_2|bA291L22.1	hydroxysteroid 17-beta dehydrogenase 7 pseudogene 2	pseudo
6704	chr16	52435422	52436280	+	21	NA	TTS (NM_001080430)	TTS (NM_001080430)	111292	NM_001080430	27324		NM_001080430	ENSG00000103460	TOX3	CAGF9|TNRC9	TOX high mobility group box family member 3	protein-coding
8230	chr1	26281051	26282013	+	21	NA	TTS (NM_031286)	TTS (NM_031286)	1446	NM_031286	83442		NM_031286	ENSG00000142669	SH3BGRL3	HEL-S-297|SH3BP-1|TIP-B1	SH3 domain binding glutamate rich protein like 3	protein-coding
6828	chr5	103562846	103563295	+	21	NA	promoter-TSS (NM_001300741)	promoter-TSS (NM_001300741)	-281	NM_001300741	83594		NM_031438	ENSG00000112874	NUDT12	-	nudix hydrolase 12	protein-coding
6086	chr1	16055872	16056575	+	21	NA	intron (NM_000085, intron 18 of 19)	intron (NM_000085, intron 18 of 19)	7461	NM_001165945	1188		NM_000085	ENSG00000184908	CLCNKB	CLCKB|ClC-K2|ClC-Kb	chloride voltage-gated channel Kb	protein-coding
5389	chr7	102572768	102573320	+	21	NA	promoter-TSS (NM_001097615)	promoter-TSS (NM_001097615)	-423	NM_001097615	548644		NM_001015884	ENSG00000285437	POLR2J3	RPB11b2	RNA polymerase II subunit J3	protein-coding
6354	chr6	107027862	107028819	+	21	NA	5' UTR (NM_001142470, exon 1 of 5)	5' UTR (NM_001142470, exon 1 of 5)	141	NM_001142468	51250		NM_016487	ENSG00000130349	MTRES1	C6orf203|HSPC230|PRED31	mitochondrial transcription rescue factor 1	protein-coding
6142	chr11	114257704	114258504	+	21	NA	intron (NM_001372047, intron 1 of 4)	intron (NM_001372047, intron 1 of 4)	298	NM_001372047	4837		NM_006169	ENSG00000166741	NNMT	-	nicotinamide N-methyltransferase	protein-coding
6382	chr22	26512014	26512917	+	20	NA	promoter-TSS (NM_001346857)	promoter-TSS (NM_001346857)	8	NM_012143	24144		NM_012143	ENSG00000100109	TFIP11	NTR1|STIP|STIP-1|Spp382|TIP39|bK445C9.6	tuftelin interacting protein 11	protein-coding
7048	chr2	45256531	45257497	+	20	NA	Intergenic	Intergenic	-2073	NR_033831	400952		NR_033831	ENSG00000205054	LINC01121	UNQ6975	long intergenic non-protein coding RNA 1121	ncRNA
5747-2	chr22	41512316	41513966	+	20	NA	intron (NM_001098, intron 4 of 17)	intron (NM_001098, intron 4 of 17)	31329	NM_001018050	171568		NM_138338	ENSG00000100413	POLR3H	C25|RPC22.9|RPC8	RNA polymerase III subunit H	protein-coding
11080	chr9	129875256	129876510	+	20	NA	intron (NM_001110303, intron 21 of 25)	intron (NM_001110303, intron 21 of 25)	6278	NR_106914	102466750		NR_106914	ENSG00000276124	MIR6855	hsa-mir-6855	microRNA 6855	ncRNA
6280-2	chr6	111737090	111737791	+	20	NA	intron (NM_002037, intron 3 of 13)	MER21B|LTR|ERVL	21691	NM_153048	2534		NM_002037	ENSG00000010810	FYN	SLK|SYN|p59-FYN	FYN proto-oncogene, Src family tyrosine kinase	protein-coding
8324	chr11	68446518	68447800	+	20	NA	intron (NM_002335, intron 22 of 22)	intron (NM_002335, intron 22 of 22)	-13593	NM_001352366	55291		NM_018312	ENSG00000110075	PPP6R3	C11orf23|PP6R3|SAP190|SAPL|SAPLa|SAPS3	protein phosphatase 6 regulatory subunit 3	protein-coding
6831	chr16	533206	534156	+	20	NA	intron (NM_005632, intron 1 of 13)	intron (NM_005632, intron 1 of 13)	-1635	NR_049852	100847028		NR_049852	ENSG00000266124	MIR5587	-	microRNA 5587	ncRNA
7066-2	chr2	210181048	210182129	+	20	NA	Intergenic	L1PA7|LINE|L1	-10179	NM_001307976	151050		NM_152519	ENSG00000144445	KANSL1L	C2orf67|MSL1v2	KAT8 regulatory NSL complex subunit 1 like	protein-coding
7854	chr3	65961606	65962575	+	20	NA	intron (NM_001033057, intron 1 of 22)	intron (NM_001033057, intron 1 of 22)	-7532	NR_145422	151877		NR_145422	ENSG00000272610	MAGI1-IT1	-	MAGI1 intronic transcript 1	ncRNA
9123	chr6	116615714	116616823	+	20	NA	promoter-TSS (NM_001161664)	promoter-TSS (NM_001161664)	-211	NM_001010892	345895		NM_001010892	ENSG00000111834	RSPH4A	CILD11|RSHL3|RSPH6B|dJ412I7.1	radial spoke head component 4A	protein-coding
6365-3	chr6	150600515	150601181	+	20	NA	intron (NM_001329799, intron 1 of 15)	CpG	963	NR_138137	57480		NM_001029884	ENSG00000120278	PLEKHG1	ARHGEF41	pleckstrin homology and RhoGEF domain containing G1	protein-coding
6852	chr13	94601599	94602444	+	20	NA	exon (NM_180989, exon 1 of 9)	exon (NM_180989, exon 1 of 9)	164	NM_180989	160897		NM_180989	ENSG00000152749	GPR180	ITR	G protein-coupled receptor 180	protein-coding
5386-2	chr1	26336110	26336844	+	20	NA	intron (NM_001039775, intron 12 of 19)	CpG-706	17653	NM_001039775	55057		NM_017977	ENSG00000176092	CRYBG2	AIM1L	crystallin beta-gamma domain containing 2	protein-coding
7399	chr11	45982979	45983654	+	20	NA	intron (NR_147890, intron 5 of 18)	intron (NR_147890, intron 5 of 18)	60660	NM_001300721	120071		NM_152312	ENSG00000165905	LARGE2	GYLTL1B|PP5656	LARGE xylosyl- and glucuronyltransferase 2	protein-coding
5817-2	chr9	98225097	98225767	+	20	NA	intron (NM_018421, intron 5 of 12)	intron (NM_018421, intron 5 of 12)	3785	NR_106913	102465514		NR_106913	ENSG00000278412	MIR6854	hsa-mir-6854	microRNA 6854	ncRNA
7996	chr13	26022494	26023437	+	20	NA	3' UTR (NM_001313741, exon 36 of 36)	3' UTR (NM_001313741, exon 36 of 36)	29051	NM_001007538	387914		NM_001007538	ENSG00000180730	SHISA2	C13orf13|PRO28631|TMEM46|WGAR9166|bA398O19.2|hShisa	shisa family member 2	protein-coding
6779	chr3	129305389	129306257	+	20	NA	TTS (NM_001363881)	TTS (NM_001363881)	-10448	NR_026991	339942		NM_001025468		H1-10-AS1	C3orf47|H1FX-AS1	H1-10 antisense RNA 1	ncRNA
7900	chr8	70805098	70805837	+	20	NA	Intergenic	L1PA10|LINE|L1	136128	NM_001287260	389668		NM_001011720	ENSG00000221947	XKR9	XRG9|hXKR9	XK related 9	protein-coding
7440	chr20	3818070	3819276	+	20	NA	Intergenic	Intergenic	-1851	NM_001204446	55317		NM_018347	ENSG00000125843	AP5S1	C20orf29	adaptor related protein complex 5 subunit sigma 1	protein-coding
8202-2	chr2	44090135	44091449	+	20	NA	Intergenic	LTR33|LTR|ERVL	-78011	NM_177969	5495		NM_002706	ENSG00000138032	PPM1B	PP2C-beta|PP2C-beta-X|PP2CB|PP2CBETA|PPC2BETAX	protein phosphatase, Mg2+/Mn2+ dependent 1B	protein-coding
8761	chr7	76485816	76486978	+	20	NA	intron (NM_001102595, intron 3 of 9)	intron (NM_001102595, intron 3 of 9)	5887	NM_001102596	113878		NM_020892	ENSG00000091073	DTX2	RNF58	deltex E3 ubiquitin ligase 2	protein-coding
5806-2	chr6	56843894	56844615	+	20	NA	promoter-TSS (NM_183380)	promoter-TSS (NM_183380)	268	NR_125866	101930010		NR_125866		DST-AS1	-	DST antisense RNA 1	ncRNA
8044	chr15	88897289	88897946	+	20	NA	Intergenic	Intergenic	-2073	NM_178232	145864		NM_178232	ENSG00000140511	HAPLN3	EXLD1|HsT19883	hyaluronan and proteoglycan link protein 3	protein-coding
8604	chr19	12884825	12885959	+	20	NA	exon (NM_006563, exon 2 of 3)	exon (NM_006563, exon 2 of 3)	1809	NM_006563	10661		NM_006563	ENSG00000105610	KLF1	EKLF|EKLF/KLF1	KLF transcription factor 1	protein-coding
6075	chr19	38095316	38095910	+	20	NA	intron (NM_015073, intron 4 of 21)	L2a|LINE|L2	-67483	NR_145800	109623473		NR_145800		SNORD152	-	small nucleolar RNA, C/D box 152	snoRNA
6438	chr3	194583628	194584431	+	20	NA	promoter-TSS (NR_047573)	promoter-TSS (NR_047573)	-239	NR_047573	100507297		NR_047573		TMEM44-AS1	-	TMEM44 antisense RNA 1	ncRNA
5469-3	chr11	86301860	86302641	+	20	NA	promoter-TSS (NM_016401)	promoter-TSS (NM_016401)	10	NR_136324	51501		NM_016401	ENSG00000149196	HIKESHI	C11orf73|HLD13|HSPC138|HSPC179|L7RN6|OPI10	heat shock protein nuclear import factor hikeshi	protein-coding
5324-2	chr2	237966324	237966993	+	20	NA	promoter-TSS (NM_001278308)	promoter-TSS (NM_001278308)	-287	NM_001278307	140739		NM_080678	ENSG00000184182	UBE2F	NCE2	ubiquitin conjugating enzyme E2 F (putative)	protein-coding
7922	chr4	158870249	158871140	+	20	NA	intron (NM_001366843, intron 15 of 17)	LTR33|LTR|ERVL	64855	NM_001366843	57600		NM_020840	ENSG00000052795	FNIP2	FNIPL|MAPO1	folliculin interacting protein 2	protein-coding
5520	chr15	66565440	66566086	+	20	NA	intron (NM_207338, intron 1 of 13)	intron (NM_207338, intron 1 of 13)	235	NR_103739	197021		NM_207338	ENSG00000188501	LCTL	KLG|KLPH	lactase like	protein-coding
5501	chr19	18224329	18224982	+	20	NA	promoter-TSS (NM_001098819)	promoter-TSS (NM_001098819)	-162	NM_001098819	5143		NM_000923	ENSG00000105650	PDE4C	DPDE1|PDE21	phosphodiesterase 4C	protein-coding
7282	chr16	84013822	84014622	+	20	NA	intron (NM_001080442, intron 9 of 10)	intron (NM_001080442, intron 9 of 10)	28573	NM_001080442	146167		NM_001080442	ENSG00000166558	SLC38A8	FHASD|FVH2|SNAT8	solute carrier family 38 member 8	protein-coding
6512	chr4	44725997	44726662	+	20	NA	intron (NM_138335, intron 1 of 6)	CpG	227	NM_138335	132789		NM_138335	ENSG00000163281	GNPDA2	GNP2|SB52	glucosamine-6-phosphate deaminase 2	protein-coding
16156	chr4	3239275	3241338	+	20	NA	3' UTR (NM_002111, exon 67 of 67)	3' UTR (NM_002111, exon 67 of 67)	-4063	NM_001330620	345222		NM_001012982	ENSG00000188981	MSANTD1	C4orf44	Myb/SANT DNA binding domain containing 1	protein-coding
7210	chr1	220747893	220748570	+	20	NA	promoter-TSS (NM_017898)	promoter-TSS (NM_017898)	-91	NM_017898	54996		NM_017898	ENSG00000117791	MTARC2	MARC2|MOSC2	mitochondrial amidoxime reducing component 2	protein-coding
6188	chr22	35064507	35065106	+	20	NA	Intergenic	Intergenic	-1352	NM_001303508	91464		NM_001008494	ENSG00000175329	ISX	Pix-1|RAXLX	intestine specific homeobox	protein-coding
8045	chr1	44681666	44682634	+	20	NA	intron (NM_001145636, intron 1 of 11)	intron (NM_001145636, intron 1 of 11)	7436	NM_001145636	339541		NM_001004307	ENSG00000198520	ARMH1	C1orf228|NCRNA00082|p40	armadillo like helical domain containing 1	protein-coding
7872-2	chr6	43668038	43669381	+	20	NA	intron (NM_001193341, intron 5 of 5)	intron (NM_001193341, intron 5 of 5)	19082	NM_018135	55168		NM_018135	ENSG00000096080	MRPS18A	HumanS18b|MRP-S18-3|MRP-S18-a|MRPS18-3|S18bmt|S18mt-a|mL66	mitochondrial ribosomal protein S18A	protein-coding
5506	chr2	157628926	157629410	+	20	NA	promoter-TSS (NM_145259)	promoter-TSS (NM_145259)	-304	NM_001111033	130399		NM_145259	ENSG00000123612	ACVR1C	ACVRLK7|ALK7	activin A receptor type 1C	protein-coding
9323	chr19	23415182	23416251	+	20	NA	intron (NR_126448, intron 1 of 5)	intron (NR_126448, intron 1 of 5)	358	NR_126449	104472717		NR_126448	ENSG00000269416	LINC01224	-	long intergenic non-protein coding RNA 1224	ncRNA
8910	chr7	44217897	44219120	+	20	NA	3' UTR (NM_001220, exon 24 of 24)	3' UTR (NM_001220, exon 24 of 24)	17530	NM_001363678	10652		NM_006555	ENSG00000106636	YKT6	-	YKT6 v-SNARE homolog	protein-coding
7124	chr15	41944159	41944944	+	20	NA	intron (NM_139265, intron 2 of 5)	intron (NM_139265, intron 2 of 5)	23134	NR_120332	101928363		NR_120332	ENSG00000259883	EHD4-AS1	-	EHD4 antisense RNA 1	ncRNA
5473	chr21	37828372	37828892	+	20	NA	intron (NM_002240, intron 2 of 3)	intron (NM_002240, intron 2 of 3)	87825	NM_002240	3763		NM_002240	ENSG00000157542	KCNJ6	BIR1|GIRK-2|GIRK2|KATP-2|KATP2|KCNJ7|KIR3.2|KPLBS|hiGIRK2	potassium inwardly rectifying channel subfamily J member 6	protein-coding
6244-2	chr17	80544752	80545432	+	20	NA	5' UTR (NM_001163034, exon 1 of 30)	5' UTR (NM_001163034, exon 1 of 30)	254	NM_001163034	57521		NM_020761	ENSG00000141564	RPTOR	KOG1|Mip1	regulatory associated protein of MTOR complex 1	protein-coding
7741-2	chr2	47029687	47030707	+	20	NA	intron (NM_020458, intron 15 of 19)	X7C_LINE|LINE|CR1	-88342	NM_001171508	90411		NM_139279	ENSG00000180398	MCFD2	F5F8D|F5F8D2|LMAN1IP|SDNSF	multiple coagulation factor deficiency 2, ER cargo receptor complex subunit	protein-coding
6258-2	chr22	23432998	23433983	+	20	NA	promoter-TSS (NR_110538)	promoter-TSS (NR_110538)	-74	NR_110538	101929374		NR_110538	ENSG00000234928	LINC01659	-	long intergenic non-protein coding RNA 1659	ncRNA
9523	chr9	8329424	8330445	+	20	NA	intron (NM_130391, intron 30 of 31)	L1PA7|LINE|L1	404012	NM_130392	5789		NM_002839	ENSG00000153707	PTPRD	HPTP|HPTPD|HPTPDELTA|PTPD|R-PTP-delta|RPTPDELTA	protein tyrosine phosphatase receptor type D	protein-coding
7269	chr6	170224649	170225839	+	20	NA	Intergenic	Intergenic	37325	NR_002787	154449		NR_002787	ENSG00000230960	LOC154449	-	uncharacterized LOC154449	ncRNA
5279	chr10	131641132	131641777	+	20	NA	Intergenic	Intergenic	148745	NR_038365	399827		NM_001001677	ENSG00000189275	LINC01164	-	long intergenic non-protein coding RNA 1164	ncRNA
5572	chr19	7256924	7257503	+	20	NA	intron (NM_001079817, intron 2 of 20)	AluSx1|SINE|Alu	37201	NM_000208	3643		NM_000208	ENSG00000171105	INSR	CD220|HHF5	insulin receptor	protein-coding
7668	chr10	17021389	17022337	+	20	NA	intron (NM_001081, intron 27 of 66)	L2c|LINE|L2	107948	NM_001081	8029		NM_001081	ENSG00000107611	CUBN	IFCR|IGS|IGS1|MGA1|gp280	cubilin	protein-coding
5978	chr15	99306598	99307467	+	20	NA	intron (NM_001321677, intron 5 of 8)	intron (NM_001321677, intron 5 of 8)	49507	NR_073383	7190		NR_073383	ENSG00000259706	HSP90B2P	GRP94P1|GRP94b|HSP|HSPCP2|TRA1P1|TRAP1	heat shock protein 90 beta family member 2, pseudogene	pseudo
20791	chr16	31133338	31133387	+	19	NA	exon (NM_002773, exon 3 of 6)	exon (NM_002773, exon 3 of 6)	2365	NM_002773	5652		NM_002773	ENSG00000052344	PRSS8	CAP1|PROSTASIN	serine protease 8	protein-coding
7786	chr1	31714992	31715854	+	19	NA	Intergenic	Intergenic	-11406	NM_001856	1307		NM_001856	ENSG00000084636	COL16A1	447AA|FP1572	collagen type XVI alpha 1 chain	protein-coding
6272	chr17	44123705	44124326	+	19	NA	promoter-TSS (NM_001015053)	promoter-TSS (NM_001015053)	-374	NM_001382393	10014		NM_005474	ENSG00000108840	HDAC5	HD5|NY-CO-9	histone deacetylase 5	protein-coding
6531-2	chr6	47247042	47248000	+	19	NA	intron (NM_014452, intron 4 of 5)	intron (NM_014452, intron 4 of 5)	62384	NM_014452	27242		NM_014452	ENSG00000146072	TNFRSF21	BM-018|CD358|DR6	TNF receptor superfamily member 21	protein-coding
5975	chr4	9603934	9604788	+	19	NA	Intergenic	HERVS71-int|LTR|ERV1	-48045	NR_031688	100302277		NR_031688	ENSG00000221275	MIR548I2	MIR548I-2|MIRN548I2|hsa-mir-548i-2|mir-548i-2	microRNA 548i-2	ncRNA
15469	chr1	87685481	87686865	+	19	NA	Intergenic	Intergenic	-314518	NR_038324	100505768		NR_038324	ENSG00000227290	LINC01364	-	long intergenic non-protein coding RNA 1364	ncRNA
7934	chr17	38752038	38753331	+	19	NA	promoter-TSS (NR_104194)	promoter-TSS (NR_104194)	-57	NR_104195	5691		NM_002795	ENSG00000277791	PSMB3	HC10-II	proteasome 20S subunit beta 3	protein-coding
14949	chr9	34688017	34690113	+	19	NA	TTS (NM_006274)	TTS (NM_006274)	2211	NM_006274	6363		NM_006274	ENSG00000172724	CCL19	CKb11|ELC|MIP-3b|MIP3B|SCYA19	C-C motif chemokine ligand 19	protein-coding
7872	chr1	25615861	25616684	+	19	NA	promoter-TSS (NM_001289010)	promoter-TSS (NM_001289010)	-519	NM_001289010	57134		NM_020379	ENSG00000117643	MAN1C1	HMIC|MAN1A3|MAN1C|pp6318	mannosidase alpha class 1C member 1	protein-coding
5465-2	chr20	41316635	41317479	+	19	NA	5' UTR (NM_001384315, exon 1 of 5)	5' UTR (NM_001384315, exon 1 of 5)	674	NM_001384322	23051		NM_015035	ENSG00000174306	ZHX3	TIX1	zinc fingers and homeoboxes 3	protein-coding
5541	chr1	246724291	246725033	+	19	NA	intron (NM_016002, intron 1 of 11)	CpG	253	NM_016002	51097		NM_016002	ENSG00000143653	SCCPDH	CGI-49|NET11	saccharopine dehydrogenase (putative)	protein-coding
5550	chr11	119702086	119702808	+	19	NA	intron (NM_203286, intron 1 of 5)	intron (NM_203286, intron 1 of 5)	26753	NM_203286	5818		NM_002855	ENSG00000110400	NECTIN1	CD111|CLPED1|ED4|HIgR|HV1S|HVEC|OFC7|PRR|PRR1|PVRL1|PVRR|PVRR1|SK-12|nectin-1	nectin cell adhesion molecule 1	protein-coding
7481	chr20	50645198	50646437	+	19	NA	non-coding (NR_111906, exon 2 of 3)	non-coding (NR_111906, exon 2 of 3)	346	NR_111906	100506175		NR_111906	ENSG00000234693	RIPOR3-AS1	-	RIPOR3 antisense RNA 1	ncRNA
6283-2	chr16	70470567	70471578	+	19	NA	exon (NM_145059, exon 12 of 24)	exon (NM_145059, exon 12 of 24)	16477	NM_145059	197258		NM_145059	ENSG00000157353	FCSK	1110046B12Rik|CDGF2|FUK	fucose kinase	protein-coding
7052	chr11	74849459	74850468	+	19	NA	intron (NR_165439, intron 3 of 7)	intron (NR_165439, intron 3 of 7)	99128	NR_165439	143570		NM_182969	ENSG00000166435	XRRA1	-	X-ray radiation resistance associated 1	protein-coding
7263-2	chr22	23913408	23914233	+	19	NA	intron (NR_003082, intron 4 of 4)	intron (NR_003082, intron 4 of 4)	-14890	NR_038911	284889		NR_038911		MIF-AS1	MIF-AS	MIF antisense RNA 1	ncRNA
7880	chr1	161943320	161944153	+	19	NA	intron (NM_007348, intron 15 of 15)	L2a|LINE|L2	80729	NM_015441	25903		NM_015441	ENSG00000162745	OLFML2B	-	olfactomedin like 2B	protein-coding
6823	chr1	245173475	245174225	+	19	NA	intron (NM_018012, intron 2 of 14)	intron (NM_018012, intron 2 of 14)	18865	NM_018012	55083		NM_018012	ENSG00000162849	KIF26B	-	kinesin family member 26B	protein-coding
6258	chr11	101914911	101915573	+	19	NA	5' UTR (NM_001363543, exon 1 of 12)	5' UTR (NM_001363543, exon 1 of 12)	232	NM_020802	57562		NM_020802	ENSG00000110318	CEP126	KIAA1377	centrosomal protein 126	protein-coding
9740	chr22	21045106	21046206	+	19	NA	promoter-TSS (NM_001291006)	promoter-TSS (NM_001291006)	-290	NR_110991	400891		NM_001013675	ENSG00000187905	LRRC74B	-	leucine rich repeat containing 74B	protein-coding
5327-2	chr17	64085394	64086073	+	19	NA	intron (NM_001433, intron 2 of 21)	intron (NM_001433, intron 2 of 21)	44411	NM_001433	2081		NM_001433	ENSG00000178607	ERN1	IRE1|IRE1P|IRE1a|hIRE1p	endoplasmic reticulum to nucleus signaling 1	protein-coding
5760	chr1	204807006	204807820	+	19	NA	Intergenic	Intergenic	-21239	NM_001378329	23114		NM_015090	ENSG00000163531	NFASC	NEDCPMD|NF|NRCAML	neurofascin	protein-coding
7531	chr3	32045115	32045808	+	19	NA	Intergenic	Intergenic	-61159	NM_015141	23171		NM_015141	ENSG00000152642	GPD1L	GPD1-L	glycerol-3-phosphate dehydrogenase 1 like	protein-coding
11447	chr22	17171223	17172830	+	19	NA	Intergenic	CpG	-6739	NM_017829	27440		NM_017829	ENSG00000069998	HDHD5	CECR5	haloacid dehalogenase like hydrolase domain containing 5	protein-coding
5680	chr12	56125924	56126765	+	19	NA	3' UTR (NM_001303125, exon 3 of 3)	3' UTR (NM_001303125, exon 3 of 3)	-1858	NM_001184796	23344		NM_015292	ENSG00000139641	ESYT1	FAM62A|MBC2	extended synaptotagmin 1	protein-coding
5663-2	chr8	143976910	143977780	+	19	NA	promoter-TSS (NM_000445)	promoter-TSS (NM_000445)	-600	NM_000445	5339		NM_000445	ENSG00000178209	PLEC	EBS1|EBS5A|EBS5B|EBS5C|EBS5D|EBSMD|EBSND|EBSO|EBSOG|EBSPA|HD1|LGMD2Q|LGMDR17|PCN|PLEC1|PLEC1b|PLTN	plectin	protein-coding
8381	chr1	156247178	156247655	+	19	NA	intron (NM_001272108, intron 1 of 5)	intron (NM_001272108, intron 1 of 5)	640	NM_001272107	79957		NM_024897	ENSG00000160781	PAQR6	PRdelta	progestin and adipoQ receptor family member 6	protein-coding
5906-2	chr16	11792405	11793051	+	19	NA	intron (NM_014153, intron 1 of 22)	MIR|SINE|MIR	4530	NM_014153	29066		NM_014153	ENSG00000122299	ZC3H7A	HSPC055|ZC3H7|ZC3HDC7	zinc finger CCCH-type containing 7A	protein-coding
10267	chr1	182634155	182635336	+	19	NA	Intergenic	Intergenic	19605	NR_036490	284648		NR_036490	ENSG00000261504	LINC01686	-	long intergenic non-protein coding RNA 1686	ncRNA
6628	chr10	56154944	56156223	+	19	NA	Intergenic	LTR12C|LTR|ERV1	205676	NM_007057	11130		NM_007057	ENSG00000122952	ZWINT	HZwint-1|KNTC2AP|SIP30|ZWINT1	ZW10 interacting kinetochore protein	protein-coding
8561	chr4	75630198	75630943	+	19	NA	promoter-TSS (NM_001330724)	promoter-TSS (NM_001330724)	-42	NM_003948	8999		NM_003948	ENSG00000138769	CDKL2	KKIAMRE|P56	cyclin dependent kinase like 2	protein-coding
7071	chr11	46369210	46370444	+	19	NA	intron (NM_001199268, intron 5 of 29)	intron (NM_001199268, intron 5 of 29)	-6575	NR_039837	100616368		NR_039837	ENSG00000264102	MIR4688	mir-4688	microRNA 4688	ncRNA
6093	chr18	33577631	33578322	+	19	NA	promoter-TSS (NM_030632)	promoter-TSS (NM_030632)	-243	NM_030632	80816		NM_030632	ENSG00000141431	ASXL3	BRPS|KIAA1713	ASXL transcriptional regulator 3	protein-coding
7070	chr19	3024934	3025945	+	19	NA	intron (NM_003260, intron 4 of 19)	intron (NM_003260, intron 4 of 19)	3841	NM_003260	7089		NM_003260	ENSG00000065717	TLE2	ESG|ESG2|GRG2	TLE family member 2, transcriptional corepressor	protein-coding
7345	chr17	43017736	43018756	+	19	NA	intron (NM_006373, intron 2 of 5)	intron (NM_006373, intron 2 of 5)	4139	NM_006373	10493		NM_006373	ENSG00000108828	VAT1	VATI	vesicle amine transport 1	protein-coding
5984	chr19	4328088	4328983	+	19	NA	intron (NM_001013841, intron 6 of 12)	CpG	10292	NM_017720	55620		NM_017720	ENSG00000178078	STAP2	BKS	signal transducing adaptor family member 2	protein-coding
7743	chr6	26087229	26088528	+	19	NA	non-coding (NR_144383, exon 2 of 2)	non-coding (NR_144383, exon 2 of 2)	449	NM_001300749	3077		NM_000410	ENSG00000010704	HFE	HFE1|HH|HLA-H|MVCD7|TFQTL2	homeostatic iron regulator	protein-coding
8810	chr9	132135884	132136943	+	19	NA	Intergenic	Intergenic	-25645	NM_032536	84628		NM_032536	ENSG00000196358	NTNG2	LHLL9381|Lmnt2|NEDBASH|NTNG1|NetrinG2|bA479K20.1	netrin G2	protein-coding
9346	chr1	241423799	241424911	+	19	NA	Intergenic	CpG	-67125	NM_001350115	6000		NM_002924	ENSG00000182901	RGS7	-	regulator of G protein signaling 7	protein-coding
9203	chr17	77435435	77436618	+	19	NA	intron (NM_001293696, intron 1 of 9)	intron (NM_001293696, intron 1 of 9)	-14723	NM_001113496	10801		NM_006640	ENSG00000184640	SEPTIN9	AF17q25|MSF|MSF1|NAPB|PNUTL4|SEPT9|SINT1|SeptD1	septin 9	protein-coding
8049	chr11	12376806	12377866	+	19	NA	promoter-TSS (NM_018222)	promoter-TSS (NM_018222)	-235	NM_018222	55742		NM_018222	ENSG00000197702	PARVA	CH-ILKBP|MXRA2	parvin alpha	protein-coding
6201	chr7	55886832	55887562	+	19	NA	promoter-TSS (NM_001366796)	promoter-TSS (NM_001366796)	-259	NM_182633	349075		NM_182633	ENSG00000178665	ZNF713	-	zinc finger protein 713	protein-coding
6010	chr9	109071946	109072776	+	19	NA	intron (NM_032012, intron 9 of 17)	LTR14|LTR|ERVK	-26063	NR_029506	407036		NR_029506	ENSG00000207698	MIR32	MIRN32|hsa-mir-32|miR-32|miRNA32	microRNA 32	ncRNA
5399	chr15	72228429	72229354	+	19	NA	intron (NM_001206798, intron 1 of 10)	intron (NM_001206798, intron 1 of 10)	1020	NM_001206799	5315		NM_002654	ENSG00000067225	PKM	CTHBP|HEL-S-30|OIP3|PK3|PKM2|TCB|THBP1|p58	pyruvate kinase M1/2	protein-coding
6358	chr2	62215156	62215981	+	19	NA	promoter-TSS (NM_001319075)	promoter-TSS (NM_001319075)	47	NM_001319075	10678		NM_006577	ENSG00000170340	B3GNT2	3-Gn-T1|3-Gn-T2|B3GN-T2|B3GNT|B3GNT-2|B3GNT1|BETA3GNT|BGNT2|BGnT-2|beta-1|beta3Gn-T1|beta3Gn-T2	UDP-GlcNAc:betaGal beta-1,3-N-acetylglucosaminyltransferase 2	protein-coding
6384-2	chr16	79599447	79600071	+	19	NA	exon (NM_005360, exon 1 of 2)	exon (NM_005360, exon 1 of 2)	978	NM_001031804	4094		NM_005360	ENSG00000178573	MAF	AYGRP|CCA4|CTRCT21|c-MAF	MAF bZIP transcription factor	protein-coding
6479	chr19	14571415	14572270	+	19	NA	intron (NM_004146, intron 1 of 2)	intron (NM_004146, intron 1 of 2)	224	NM_004146	4713		NM_004146	ENSG00000099795	NDUFB7	B18|CI-B18|MC1DN39	NADH:ubiquinone oxidoreductase subunit B7	protein-coding
5767-2	chr22	28882791	28883601	+	19	NA	promoter-TSS (NM_001206998)	promoter-TSS (NM_001206998)	-376	NM_001206998	84133		NM_032173	ENSG00000183579	ZNRF3	BK747E2.3|RNF203	zinc and ring finger 3	protein-coding
6857	chr20	63893962	63895126	+	19	NA	promoter-TSS (NM_025219)	promoter-TSS (NM_025219)	-582	NM_025219	80331		NM_025219	ENSG00000101152	DNAJC5	CLN4|CLN4B|CSP|DNAJC5A|NCL|mir-941-2|mir-941-3|mir-941-4|mir-941-5	DnaJ heat shock protein family (Hsp40) member C5	protein-coding
5457-2	chr11	123509511	123510369	+	19	NA	promoter-TSS (NM_001330396)	promoter-TSS (NM_001330396)	24	NM_001330396	57476		NM_020716	ENSG00000023171	GRAMD1B	LINC01059	GRAM domain containing 1B	protein-coding
6138	chr3	181838485	181839645	+	19	NA	Intergenic	Intergenic	-113299	NR_104146	100996490		NR_104146	ENSG00000242512	LINC01206	-	long intergenic non-protein coding RNA 1206	ncRNA
5210	chr13	108215436	108216022	+	19	NA	promoter-TSS (NM_002312)	promoter-TSS (NM_002312)	-193	NM_001379095	3981		NM_002312	ENSG00000174405	LIG4	LIG4S	DNA ligase 4	protein-coding
5788-2	chr3	39106674	39107384	+	19	NA	promoter-TSS (NM_001105513)	promoter-TSS (NM_001105513)	598	NR_103866	64689		NM_031899	ENSG00000114745	GORASP1	GOLPH5|GRASP65|P65	golgi reassembly stacking protein 1	protein-coding
5621	chr16	81767809	81768633	+	19	NA	Intergenic	L1ME1|LINE|L1	-11070	NM_002661	5336		NM_002661	ENSG00000197943	PLCG2	APLAID|FCAS3|PLC-IV|PLC-gamma-2	phospholipase C gamma 2	protein-coding
5324	chr17	13509805	13510562	+	19	NA	intron (NM_006042, intron 1 of 1)	intron (NM_006042, intron 1 of 1)	33463	NR_031679	100302287		NR_031679	ENSG00000221698	MIR548H3	MIR548H-3|MIRN548H3|hsa-mir-548h-3	microRNA 548h-3	ncRNA
8898-2	chr5	172414499	172415377	+	19	NA	intron (NM_001308175, intron 2 of 12)	L2b|LINE|L2	39585	NM_001308175	285590		NM_001017995	ENSG00000174705	SH3PXD2B	FAD49|FTHS|HOFI|KIAA1295|TKS4|TSK4	SH3 and PX domains 2B	protein-coding
5491-2	chr20	62382393	62383154	+	19	NA	Intergenic	Intergenic	-4330	NM_001024	6227		NM_001024	ENSG00000171858	RPS21	HLDF|S21|eS21	ribosomal protein S21	protein-coding
5775	chr11	14357789	14358577	+	19	NA	intron (NM_001177314, intron 1 of 5)	intron (NM_001177314, intron 1 of 5)	302	NM_001177315	22800		NM_012250	ENSG00000133818	RRAS2	NS12|TC21	RAS related 2	protein-coding
5832	chr7	2660631	2662019	+	19	NA	intron (NM_025250, intron 13 of 13)	intron (NM_025250, intron 13 of 13)	-18197	NM_001384742	155185		NM_133463	ENSG00000174945	AMZ1	-	archaelysin family metallopeptidase 1	protein-coding
6350	chr1	204615568	204616701	+	19	NA	Intergenic	Intergenic	69604	NM_006338	10446		NM_006338	ENSG00000170382	LRRN2	FIGLER7|GAC1|LRANK1|LRRN5	leucine rich repeat neuronal 2	protein-coding
6109	chr5	134019467	134019484	+	19	NA	Intergenic	AluJo|SINE|Alu	-14500	NM_003374	7416		NM_003374	ENSG00000213585	VDAC1	PORIN|VDAC-1	voltage dependent anion channel 1	protein-coding
8929	chr16	89994637	89996060	+	18	NA	non-coding (NR_003226, exon 11 of 11)	non-coding (NR_003226, exon 11 of 11)	13656	NM_001371581	79007		NM_024043	ENSG00000003249	DBNDD1	-	dysbindin domain containing 1	protein-coding
10814	chr2	23483690	23485442	+	18	NA	intron (NM_052920, intron 2 of 13)	intron (NM_052920, intron 2 of 13)	99387	NM_052920	114818		NM_025067	ENSG00000119771	KLHL29	KBTBD9	kelch like family member 29	protein-coding
5859	chr20	11917399	11918597	+	18	NA	5' UTR (NM_001282551, exon 1 of 5)	5' UTR (NM_001282551, exon 1 of 5)	105	NM_014962	22903		NM_014962	ENSG00000132640	BTBD3	dJ742J24.1	BTB domain containing 3	protein-coding
10604	chr5	148825814	148827003	+	18	NA	promoter-TSS (NM_000024)	promoter-TSS (NM_000024)	-203	NM_000024	154		NM_000024	ENSG00000169252	ADRB2	ADRB2R|ADRBR|ARB2|B2AR|BAR|BETA2AR	adrenoceptor beta 2	protein-coding
7356-2	chr22_KI270733v1_random	178837	179724	+	18	NA	Intergenic	LSU-rRNA_Hsa|rRNA|rRNA	5324	NR_146120	109864274		NR_146120		RNA5-8SN4	RN5-8S1|RNA5-8S5	RNA, 5.8S ribosomal N4	rRNA
6454	chr7	30470017	30470839	+	18	NA	intron (NM_001354849, intron 1 of 12)	L2c|LINE|L2	8356	NM_006092	10392		NM_006092	ENSG00000106100	NOD1	CARD4|CLR7.1|NLRC1|hNod1	nucleotide binding oligomerization domain containing 1	protein-coding
12302	chr9	121295150	121297288	+	18	NA	intron (NM_001258030, intron 1 of 16)	MIRb|SINE|MIR	-3217	NM_001353075	2934		NM_000177	ENSG00000148180	GSN	ADF|AGEL	gelsolin	protein-coding
8979	chr8	22140858	22142497	+	18	NA	5' UTR (NM_001316965, exon 1 of 7)	5' UTR (NM_001316965, exon 1 of 7)	230	NM_001316965	80346		NM_025232	ENSG00000168476	REEP4	C8orf20|PP432|Yip2c	receptor accessory protein 4	protein-coding
9683	chr6	137867101	137868349	+	18	NA	non-coding (NR_049793, exon 1 of 4)	non-coding (NR_049793, exon 1 of 4)	466	NM_006290	7128		NM_006290	ENSG00000118503	TNFAIP3	A20|AIFBL1|AISBL|OTUD7C|TNFA1P2	TNF alpha induced protein 3	protein-coding
5288	chr11	45262877	45263633	+	18	NA	intron (NM_001247987, intron 2 of 7)	L2b|LINE|L2	23086	NM_001247987	57586		NM_020826	ENSG00000019505	SYT13	-	synaptotagmin 13	protein-coding
6321	chr2	159147042	159147890	+	18	NA	intron (NM_001350062, intron 5 of 23)	intron (NM_001350062, intron 5 of 23)	-39369	NR_106948	102465535		NR_106948	ENSG00000275141	MIR6888	hsa-mir-6888	microRNA 6888	ncRNA
5395	chr13	36818747	36819437	+	18	NA	promoter-TSS (NM_000538)	promoter-TSS (NM_000538)	-130	NM_000538	5994		NM_000538	ENSG00000133111	RFXAP	-	regulatory factor X associated protein	protein-coding
6979	chr14	42474027	42474833	+	18	NA	Intergenic	MLT2A2|LTR|ERVL	867574	NM_001346175	145581		NM_152447	ENSG00000165379	LRFN5	C14orf146|FIGLER8|SALM5	leucine rich repeat and fibronectin type III domain containing 5	protein-coding
5276	chr12	50103785	50104287	+	18	NA	promoter-TSS (NM_001257199)	promoter-TSS (NM_001257199)	28	NM_001257199	2819		NM_005276	ENSG00000167588	GPD1	GPD-C|GPDH-C|HTGTI	glycerol-3-phosphate dehydrogenase 1	protein-coding
10536	chr8	23335645	23336892	+	18	NA	promoter-TSS (NR_038323)	promoter-TSS (NR_038323)	60	NR_038323	100507156		NR_038323	ENSG00000253837	LOXL2-AS1	-	LOXL2 antisense RNA 1	ncRNA
6620-2	chr4	6278465	6279162	+	18	NA	intron (NM_006005, intron 2 of 7)	intron (NM_006005, intron 2 of 7)	8963	NM_001145853	7466		NM_006005	ENSG00000109501	WFS1	CTRCT41|WFRS|WFS|WFSL	wolframin ER transmembrane glycoprotein	protein-coding
8782	chr9	76458976	76459823	+	18	NA	intron (NM_001097633, intron 1 of 2)	CpG	217	NM_001490	2650		NM_001490	ENSG00000187210	GCNT1	C2GNT|C2GNT-L|C2GNT1|C2GlcNAcT|G6NT|NACGT2|NAGCT2	glucosaminyl (N-acetyl) transferase 1	protein-coding
5902-3	chr2	74379900	74380744	+	18	NA	promoter-TSS (NM_001135040)	promoter-TSS (NM_001135040)	-11	NM_001135040	1639		NM_004082	ENSG00000204843	DCTN1	DAP-150|DP-150|HMND14|P135	dynactin subunit 1	protein-coding
5398	chr9	117413882	117414619	+	18	NA	intron (NM_014010, intron 1 of 21)	CpG	807	NM_014010	23245		NM_014010	ENSG00000148219	ASTN2	bA67K19.1	astrotactin 2	protein-coding
5591	chr10	44975553	44976300	+	18	NA	TTS (NM_007021)	TTS (NM_007021)	2883	NM_007021	11067		NM_007021	ENSG00000165507	DEPP1	C10orf10|DEPP|FIG|Fseg	DEPP autophagy regulator 1	protein-coding
5751	chr9	129320446	129321579	+	18	NA	promoter-TSS (NR_149714)	promoter-TSS (NR_149714)	-4	NR_149714	414318		NR_149714		LINC02913	C9orf106	long intergenic non-protein coding RNA 2913	ncRNA
7162-2	chr4	153242427	153243369	+	18	NA	intron (NM_001375516, intron 2 of 12)	MIRb|SINE|MIR	-14461	NM_001302694	23321		NM_015271	ENSG00000109654	TRIM2	CMT2R|RNF86	tripartite motif containing 2	protein-coding
6672	chr22	37807503	37808315	+	18	NA	promoter-TSS (NM_014291)	promoter-TSS (NM_014291)	4	NM_001171690	23464		NM_014291	ENSG00000100116	GCAT	KBL	glycine C-acetyltransferase	protein-coding
5558-2	chrX	63350827	63351463	+	18	NA	5' UTR (NM_001012968, exon 1 of 1)	5' UTR (NM_001012968, exon 1 of 1)	187	NM_001012968	139886		NM_001012968	ENSG00000186767	SPIN4	LJBS|TDRD28	spindlin family member 4	protein-coding
6827	chr17	75876081	75876917	+	18	NA	intron (NM_033452, intron 2 of 5)	intron (NM_033452, intron 2 of 5)	2082	NM_033452	91107		NM_033452	ENSG00000132481	TRIM47	GOA|RNF100	tripartite motif containing 47	protein-coding
6649	chr8	41623980	41624868	+	18	NA	3' UTR (NM_001363198, exon 14 of 14)	3' UTR (NM_001363198, exon 14 of 14)	22935	NM_152568	157848		NM_152568	ENSG00000165066	NKX6-3	NKX6.3	NK6 homeobox 3	protein-coding
6294	chr17	4006504	4007351	+	18	NA	exon (NM_015113, exon 55 of 55)	exon (NM_015113, exon 55 of 55)	29824	NR_146884	105371496		NR_146884		LINC01975	-	long intergenic non-protein coding RNA 1975	ncRNA
7382	chr8	93338287	93339431	+	18	NA	Intergenic	Intergenic	-172009	NR_161372	389676		NR_161372	ENSG00000279847	LINC02906	C8orf87	long intergenic non-protein coding RNA 2906	ncRNA
6484	chr15	25757912	25758919	+	18	NA	intron (NM_024490, intron 2 of 20)	LTR10F|LTR|ERV1	90410	NR_039865	100616474		NR_039865	ENSG00000266517	MIR4715	-	microRNA 4715	ncRNA
5664	chr5	150544585	150545192	+	18	NA	intron (NM_001543, intron 10 of 14)	intron (NM_001543, intron 10 of 14)	36757	NM_001543	3340		NM_001543	ENSG00000070614	NDST1	HSST|MRT46|NST1	N-deacetylase and N-sulfotransferase 1	protein-coding
5587	chr4	71200935	71201662	+	18	NA	intron (NM_001134742, intron 1 of 24)	LTR16|LTR|ERVL	14039	NM_001098484	8671		NM_003759	ENSG00000080493	SLC4A4	HNBC1|KNBC|NBC1|NBC2|NBCe1|NBCe1-A|SLC4A5|hhNMC|kNBC1|pNBC	solute carrier family 4 member 4	protein-coding
7071-2	chr7	29989156	29989823	+	18	NA	intron (NM_001145514, intron 1 of 7)	CpG	312	NM_001145515	9805		NM_014766	ENSG00000136193	SCRN1	SES1	secernin 1	protein-coding
5857	chr3	157437728	157438484	+	18	NA	intron (NM_002852, intron 2 of 2)	intron (NM_002852, intron 2 of 2)	1256	NM_002852	5806		NM_002852	ENSG00000163661	PTX3	TNFAIP5|TSG-14	pentraxin 3	protein-coding
6007	chr18	33578743	33579494	+	18	NA	intron (NM_030632, intron 1 of 11)	intron (NM_030632, intron 1 of 11)	899	NM_030632	80816		NM_030632	ENSG00000141431	ASXL3	BRPS|KIAA1713	ASXL transcriptional regulator 3	protein-coding
5285	chr1	214437988	214438788	+	18	NA	intron (NM_005401, intron 3 of 18)	intron (NM_005401, intron 3 of 18)	113214	NM_005401	5784		NM_005401	ENSG00000152104	PTPN14	CATLPH|PEZ|PTP36|PTPD2	protein tyrosine phosphatase non-receptor type 14	protein-coding
16421	chr1	51298040	51300516	+	18	NA	intron (NM_001144832, intron 12 of 17)	LTR22C0|LTR|ERVK	-1317	NM_001297666	22996		NM_001080494	ENSG00000085831	TTC39A	C1orf34|DEME-6	tetratricopeptide repeat domain 39A	protein-coding
7285	chr1	21855619	21856672	+	18	NA	intron (NM_001291860, intron 44 of 96)	L2a|LINE|L2	43880	NM_001013693	401944		NM_001013693	ENSG00000187942	LDLRAD2	-	low density lipoprotein receptor class A domain containing 2	protein-coding
6539-4	chr9	124852646	124853522	+	18	NA	promoter-TSS (NM_001276376)	promoter-TSS (NM_001276376)	-333	NM_001276376	401551		NM_001045476	ENSG00000136918	WDR38	-	WD repeat domain 38	protein-coding
11153	chr16	85601832	85603533	+	18	NA	Intergenic	Intergenic	-8727	NM_001134473	23199		NM_014615	ENSG00000131149	GSE1	CRHSP24|KIAA0182	Gse1 coiled-coil protein	protein-coding
6442-2	chr14	63045532	63046490	+	18	NA	promoter-TSS (NM_139318)	promoter-TSS (NM_139318)	-553	NM_172375	27133		NM_139318	ENSG00000140015	KCNH5	DEE112|EAG2|H-EAG2|Kv10.2|hEAG2	potassium voltage-gated channel subfamily H member 5	protein-coding
7311	chr15	78131339	78132183	+	18	NA	promoter-TSS (NM_001271888)	promoter-TSS (NM_001271888)	-226	NR_125435	10518		NM_006383	ENSG00000136425	CIB2	DFNB48|KIP2|USH1J	calcium and integrin binding family member 2	protein-coding
5968-2	chr3	126982183	126982983	+	18	NA	Intergenic	CpG	-6011	NM_032242	5361		NM_032242	ENSG00000114554	PLXNA1	DWOPNED|NOV|NOVP|PLEXIN-A1|PLXN1	plexin A1	protein-coding
7107	chr7	157336574	157337287	+	18	NA	promoter-TSS (NM_058246)	promoter-TSS (NM_058246)	-74	NM_005494	10049		NM_005494	ENSG00000105993	DNAJB6	DJ4|DnaJ|HHDJ1|HSJ-2|HSJ2|LGMD1D|LGMD1E|LGMDD1|MRJ|MSJ-1	DnaJ heat shock protein family (Hsp40) member B6	protein-coding
9953	chr15	40069199	40070355	+	18	NA	Intergenic	Intergenic	30466	NR_040061	100131089		NR_040059	ENSG00000248508	SRP14-DT	SRP14-AS1	SRP14 divergent transcript	ncRNA
7325-2	chr17	3879038	3880271	+	18	NA	intron (NM_172207, intron 10 of 15)	L2b|LINE|L2	11089	NM_172206	84254		NM_032294	ENSG00000004660	CAMKK1	CAMKKA	calcium/calmodulin dependent protein kinase kinase 1	protein-coding
8480	chr1	204673471	204675033	+	18	NA	intron (NM_201630, intron 1 of 1)	intron (NM_201630, intron 1 of 1)	11486	NM_006338	10446		NM_006338	ENSG00000170382	LRRN2	FIGLER7|GAC1|LRANK1|LRRN5	leucine rich repeat neuronal 2	protein-coding
10231	chr2	25256128	25257819	+	18	NA	intron (NR_135490, intron 6 of 23)	intron (NR_135490, intron 6 of 23)	-4658	NM_153759	1788		NM_022552	ENSG00000119772	DNMT3A	DNMT3A2|HESJAS|M.HsaIIIA|TBRS	DNA methyltransferase 3 alpha	protein-coding
6799	chr10	67883990	67884892	+	18	NA	promoter-TSS (NM_012238)	promoter-TSS (NM_012238)	-215	NM_012238	23411		NM_012238	ENSG00000096717	SIRT1	SIR2|SIR2L1|SIR2alpha	sirtuin 1	protein-coding
8202	chr19	40690644	40692157	+	18	NA	promoter-TSS (NM_001289979)	promoter-TSS (NM_001289979)	-749	NM_004756	9253		NM_004756	ENSG00000105245	NUMBL	CAG3A|CTG3a|NBL|NUMB-R|NUMBLIKE|NUMBR|TNRC23	NUMB like endocytic adaptor protein	protein-coding
8034	chr19	1081544	1082985	+	18	NA	intron (NM_012292, intron 19 of 22)	CpG-12984	5630	NM_001282334	23526		NM_012292	ENSG00000180448	ARHGAP45	HA-1|HLA-HA1|HMHA1	Rho GTPase activating protein 45	protein-coding
7325	chr12	42238161	42239060	+	18	NA	promoter-TSS (NM_005748)	promoter-TSS (NM_005748)	-242	NR_135140	10138		NM_005748	ENSG00000015153	YAF2	-	YY1 associated factor 2	protein-coding
5453	chr7	101390537	101391269	+	18	NA	intron (NM_133457, intron 1 of 12)	intron (NM_133457, intron 1 of 12)	28028	NM_001278563	136227		NM_133457	ENSG00000160963	COL26A1	EMI6|EMID2|EMU2|SH2B	collagen type XXVI alpha 1 chain	protein-coding
5339	chr10	34808974	34809675	+	18	NA	intron (NM_019619, intron 1 of 24)	intron (NM_019619, intron 1 of 24)	5972	NM_001184789	56288		NM_019619	ENSG00000148498	PARD3	ASIP|Baz|PAR3|PAR3alpha|PARD-3|PARD3A|PPP1R118|SE2-5L16|SE2-5LT1|SE2-5T2	par-3 family cell polarity regulator	protein-coding
9139	chr1	204574454	204575491	+	18	NA	Intergenic	Intergenic	58566	NM_002393	4194		NM_002393	ENSG00000198625	MDM4	BMFS6|HDMX|MDMX|MRP1	MDM4 regulator of p53	protein-coding
7166	chr22	46035797	46037186	+	18	NA	Intergenic	Intergenic	8377	NR_027036	100271722		NR_027036		LINC00899	-	long intergenic non-protein coding RNA 899	ncRNA
6303	chr13	38945363	38946509	+	18	NA	Intergenic	L2|LINE|L2	44895	NM_145286	161003		NM_145286	ENSG00000133115	STOML3	Epb7.2l|SRO	stomatin like 3	protein-coding
6425	chr17_KI270908v1_alt	895677	896428	+	18	NA	promoter-TSS (NM_015443)	promoter-TSS (NM_015443)	375	NR_034172	644246		NR_034172	ENSG00000214401	KANSL1-AS1	-	KANSL1 antisense RNA 1	ncRNA
5733	chr17	81101454	81102536	+	18	NA	intron (NM_001385159, intron 2 of 8)	intron (NM_001385159, intron 2 of 8)	4384	NM_001385159	10458		NM_006340	ENSG00000175866	BAIAP2	BAP2|FLAF3|IRSP53|WAML	BAR/IMD domain containing adaptor protein 2	protein-coding
5590	chr6	46098462	46099360	+	18	NA	intron (NM_001370650, intron 1 of 6)	intron (NM_001370650, intron 1 of 6)	-18563	NM_001114086	53405		NM_016929	ENSG00000112782	CLIC5	DFNB102|DFNB103|MST130|MSTP130	chloride intracellular channel 5	protein-coding
5528	chr11	117316147	117316937	+	18	NA	promoter-TSS (NM_138971)	promoter-TSS (NM_138971)	-286	NM_138971	23621		NM_012104	ENSG00000186318	BACE1	ASP2|BACE|HSPC104	beta-secretase 1	protein-coding
9047	chr4	139764294	139765137	+	18	NA	intron (NM_018717, intron 2 of 4)	intron (NM_018717, intron 2 of 4)	98896	NM_002413	4258		NM_002413	ENSG00000085871	MGST2	GST2|MGST-II	microsomal glutathione S-transferase 2	protein-coding
7418	chr1	18160641	18161763	+	18	NA	intron (NM_032880, intron 1 of 9)	intron (NM_032880, intron 1 of 9)	53404	NM_032880	84966		NM_032880	ENSG00000117154	IGSF21	-	immunoglobin superfamily member 21	protein-coding
5494	chr1	65467454	65468254	+	18	NA	intron (NM_002303, intron 2 of 19)	L1PA6|LINE|L1	47138	NM_001198681	54741		NM_017526	ENSG00000213625	LEPROT	LEPR|OB-RGRP|OBRGRP|VPS55	leptin receptor overlapping transcript	protein-coding
6886	chr1	37595520	37596332	+	18	NA	promoter-TSS (NM_001323623)	promoter-TSS (NM_001323623)	11	NM_013285	29889		NM_013285	ENSG00000134697	GNL2	HUMAUANTIG|NGP1|Ngp-1|Nog2|Nug2	G protein nucleolar 2	protein-coding
10177	chr7	73618444	73620041	+	18	NA	intron (NR_134541, intron 1 of 15)	AluSx1|SINE|Alu	5280	NM_032952	51085		NM_032951	ENSG00000009950	MLXIPL	CHREBP|MIO|MLX|MONDOB|WBSCR14|WS-bHLH|bHLHd14	MLX interacting protein like	protein-coding
5682-2	chr3	75502669	75503728	+	18	NA	intron (NR_151705, intron 2 of 2)	HERVS71-int|LTR|ERV1	67890	NR_151706	107986100		NR_151705	ENSG00000272690	LINC02018	-	long intergenic non-protein coding RNA 2018	ncRNA
6208-2	chr14	76346560	76347514	+	18	NA	Intergenic	Intergenic	-24234	NM_004452	2103		NM_004452	ENSG00000119715	ESRRB	DFNB35|ERR beta-2|ERR2|ERRb|ERRbeta2|ESRL2|NR3B2	estrogen related receptor beta	protein-coding
5353	chr2	177322510	177323204	+	18	NA	intron (NR_026966, intron 6 of 8)	intron (NR_026966, intron 6 of 8)	-8975	NR_106767	102465255		NR_106767	ENSG00000278418	MIR6512	hsa-mir-6512|mir-6512	microRNA 6512	ncRNA
6968	chr6	53029433	53030332	+	18	NA	intron (NM_001375400, intron 6 of 14)	intron (NM_001375400, intron 6 of 14)	31942	NM_001375400	22858		NM_014920	ENSG00000112144	CILK1	ECO|EJM10|ICK|LCK2|MRK|hICK	ciliogenesis associated kinase 1	protein-coding
10731	chr14	72925974	72927462	+	18	NA	intron (NM_181340, intron 1 of 12)	CpG	254	NM_001163508	26094		NM_015604	ENSG00000119599	DCAF4	WDR21|WDR21A	DDB1 and CUL4 associated factor 4	protein-coding
5469-2	chr10	48306991	48307640	+	18	NA	intron (NR_136583, intron 1 of 11)	CpG	638	NR_136585	5599		NM_002750	ENSG00000107643	MAPK8	JNK|JNK-46|JNK1|JNK1A2|JNK21B1/2|PRKM8|SAPK1|SAPK1c	mitogen-activated protein kinase 8	protein-coding
5996	chr6	111029799	111030800	+	17	NA	Intergenic	Intergenic	17255	NR_002932	442245		NR_002932		GSTM2P1	-	glutathione S-transferase mu 2 pseudogene 1	pseudo
6153	chr15	25481213	25482074	+	17	NA	Intergenic	Intergenic	-42587	NM_000462	7337		NM_000462	ENSG00000114062	UBE3A	ANCR|AS|E6-AP|EPVE6AP|HPVE6A|PIX1	ubiquitin protein ligase E3A	protein-coding
6613	chr12	106986603	106987398	+	17	NA	5' UTR (NM_001033050, exon 1 of 3)	5' UTR (NM_001033050, exon 1 of 3)	146	NM_001033050	80298		NM_025198	ENSG00000120832	MTERF2	MTERFD3|mTERFL	mitochondrial transcription termination factor 2	protein-coding
7247-2	chr3	115658188	115659246	+	17	NA	intron (NM_002045, intron 1 of 2)	CpG	35207	NM_001130064	2596		NM_002045	ENSG00000172020	GAP43	B-50|GAP-43|PP46	growth associated protein 43	protein-coding
7746	chr11	61226429	61227782	+	17	NA	intron (NM_001079808, intron 4 of 8)	intron (NM_001079808, intron 4 of 8)	4756	NM_001079808	643847		NM_001079808	ENSG00000229183	PGA4	-	pepsinogen A4	protein-coding
7411	chr19	4669657	4670610	+	17	NA	intron (NM_019107, intron 1 of 5)	CpG	209	NM_019107	56005		NM_019107	ENSG00000074842	MYDGF	C19orf10|EUROIMAGE1875335|IL25|IL27|IL27w|R33729_1|SF20	myeloid derived growth factor	protein-coding
5421	chr12	119868884	119869710	+	17	NA	intron (NM_007174, intron 2 of 46)	intron (NM_007174, intron 2 of 46)	8023	NM_007174	11113		NM_007174	ENSG00000122966	CIT	CITK|CRIK|MCPH17|STK21	citron rho-interacting serine/threonine kinase	protein-coding
7570	chr3	131026324	131027066	+	17	NA	promoter-TSS (NM_001353034)	promoter-TSS (NM_001353034)	130	NM_014065	28990		NM_014065	ENSG00000034533	ASTE1	HT001	asteroid homolog 1	protein-coding
5468	chr1	219575243	219576327	+	17	NA	Intergenic	Intergenic	-18461	NR_135822	102723886		NR_135822		LYPLAL1-AS1	-	LYPLAL1 antisense RNA 1	ncRNA
9809	chr1	151145942	151147316	+	17	NA	promoter-TSS (NM_030913)	promoter-TSS (NM_030913)	2	NM_001178062	10500		NM_030913	ENSG00000143434	SEMA6C	SEMAY|Sema-Y|m-SemaY|m-SemaY2	semaphorin 6C	protein-coding
5322	chr17	45006073	45006668	+	17	NA	Intergenic	MIR3|SINE|MIR	-38067	NM_006688	10882		NM_006688	ENSG00000131094	C1QL1	C1QRF|C1QTNF14|CRF|CTRP14	complement C1q like 1	protein-coding
6177-2	chr7	140506807	140507602	+	17	NA	Intergenic	Intergenic	-27635	NM_001145125	23608		NM_013446	ENSG00000133606	MKRN1	RNF61	makorin ring finger protein 1	protein-coding
11951	chr9	120386610	120388982	+	17	NA	Intergenic	Intergenic	-142746	NR_029604	406939		NR_029604	ENSG00000207814	MIR147A	MIR147|MIRN147|hsa-mir-147a	microRNA 147a	ncRNA
9284	chr17	18038526	18039568	+	17	NA	promoter-TSS (NM_024052)	promoter-TSS (NM_024052)	121	NM_145691	91647		NM_145691	ENSG00000171953	ATPAF2	ATP12|ATP12p|LP3663|MC5DN1	ATP synthase mitochondrial F1 complex assembly factor 2	protein-coding
7035-2	chr12	109463097	109463846	+	17	NA	intron (NR_133898, intron 1 of 5)	intron (NR_133898, intron 1 of 5)	13829	NM_031954	83892		NM_031954	ENSG00000110906	KCTD10	BTBD28|MSTP028|ULRO61|hBACURD3	potassium channel tetramerization domain containing 10	protein-coding
5677-2	chr12	118497759	118498709	+	17	NA	Intergenic	MER115|DNA|hAT-Tip100	121679	NM_022491	64426		NM_022491	ENSG00000111707	SUDS3	SAP45|SDS3	SDS3 homolog, SIN3A corepressor complex component	protein-coding
7356	chr12	121839107	121840265	+	17	NA	3' UTR (NM_001171993, exon 16 of 16)	3' UTR (NM_001171993, exon 16 of 16)	19173	NM_002150	3242		NM_002150	ENSG00000158104	HPD	4-HPPD|4HPPD|GLOD3|HPPD|HPPDASE|PPD	4-hydroxyphenylpyruvate dioxygenase	protein-coding
5325	chr2	112941700	112942459	+	17	NA	Intergenic	Intergenic	26886	NM_173205	27178		NM_014439	ENSG00000125571	IL37	FIL1|FIL1(ZETA)|FIL1Z|IL-1F7|IL-1H|IL-1H4|IL-1RP1|IL-23|IL-37|IL1F7|IL1H4|IL1RP1	interleukin 37	protein-coding
5796-2	chr17	1484938	1485649	+	17	NA	5' UTR (NM_001363855, exon 1 of 32)	5' UTR (NM_001363855, exon 1 of 32)	108	NM_001363855	4641		NM_033375	ENSG00000197879	MYO1C	MMI-beta|MMIb|MyoIC|NMI|myr2	myosin IC	protein-coding
6943	chr11	111601898	111603016	+	17	NA	promoter-TSS (NM_015191)	promoter-TSS (NM_015191)	8	NM_015191	23235		NM_015191	ENSG00000170145	SIK2	LOH11CR1I|QIK|SIK-2|SNF1LK2	salt inducible kinase 2	protein-coding
5690	chr18	8982375	8983295	+	17	NA	Intergenic	Intergenic	-119864	NM_021074	4729		NM_021074	ENSG00000178127	NDUFV2	CI-24k|MC1DN7	NADH:ubiquinone oxidoreductase core subunit V2	protein-coding
7065	chr17	41184205	41185022	+	17	NA	exon (NM_033060, exon 1 of 2)	exon (NM_033060, exon 1 of 2)	298	NM_033060	85285		NM_033060	ENSG00000198443	KRTAP4-1	KAP4.1|KAP4.10|KRTAP4-10|KRTAP4.10	keratin associated protein 4-1	protein-coding
6220	chr15	75204402	75205260	+	17	NA	intron (NM_015492, intron 1 of 2)	intron (NM_015492, intron 1 of 2)	2949	NM_015492	56905		NM_015492	ENSG00000167173	C15orf39	-	chromosome 15 open reading frame 39	protein-coding
11639	chr16	83952827	83954175	+	17	NA	intron (NM_182981, intron 1 of 5)	intron (NM_182981, intron 1 of 5)	261	NM_182981	29948		NM_013370	ENSG00000140961	OSGIN1	BDGI|OKL38	oxidative stress induced growth inhibitor 1	protein-coding
8895	chr4	17552078	17553091	+	17	NA	Intergenic	Intergenic	-24614	NM_015907	51056		NM_015907	ENSG00000002549	LAP3	HEL-S-106|LAP|LAPEP|PEPS	leucine aminopeptidase 3	protein-coding
6098	chr16	68079683	68080393	+	17	NA	TTS (NM_001271762)	TTS (NM_001271762)	-5332	NM_173165	4775		NM_004555	ENSG00000072736	NFATC3	NF-AT4c|NFAT4|NFATX|n339260	nuclear factor of activated T cells 3	protein-coding
5232	chr12	110613737	110614553	+	17	NA	promoter-TSS (NM_001319682)	promoter-TSS (NM_001319682)	16	NM_001319682	79600		NM_024549	ENSG00000204852	TCTN1	JBTS13|TECT1	tectonic family member 1	protein-coding
5906	chr10	71319324	71320026	+	17	NA	5' UTR (NM_001363518, exon 1 of 6)	5' UTR (NM_001363518, exon 1 of 6)	416	NM_018344	55315		NM_018344	ENSG00000198246	SLC29A3	ENT3|HCLAP|HJCD|PHID	solute carrier family 29 member 3	protein-coding
6127	chr8	143246295	143247165	+	17	NA	promoter-TSS (NM_001271156)	promoter-TSS (NM_001271156)	-209	NM_173832	286128		NM_173832	ENSG00000181638	ZFP41	ZNF753|zfp-41	ZFP41 zinc finger protein	protein-coding
6333	chr22	18511602	18513096	+	17	NA	Intergenic	(AGAC)n|Simple_repeat|Simple_repeat	5812	NM_001355479	728226		NM_001355479	ENSG00000274252	GGTLC3	GGT	gamma-glutamyltransferase light chain family member 3	protein-coding
8215	chr16	88524642	88525959	+	17	NA	intron (NR_148997, intron 2 of 3)	intron (NR_148997, intron 2 of 3)	5753	NR_148997	100128882		NR_148997	ENSG00000261744	ZFPM1-AS1	-	ZFPM1 antisense RNA 1	ncRNA
5782-2	chr21	8396763	8397462	+	17	NA	non-coding (NR_146154, exon 1 of 1)	non-coding (NR_146154, exon 1 of 1)	186	NR_146154	109910382		NR_146154		RNA28SN3	-	RNA, 28S ribosomal N3	rRNA
7067	chr14	104225246	104226128	+	17	NA	intron (NR_146612, intron 1 of 2)	intron (NR_146612, intron 1 of 2)	2103	NR_146611	145195		NR_146611	ENSG00000258913	LINC02691	C14orf144	long intergenic non-protein coding RNA 2691	ncRNA
5724-3	chr9	133884797	133885599	+	17	NA	intron (NM_001134398, intron 2 of 29)	Charlie13a|DNA|hAT-Charlie	107126	NM_001134398	7410		NM_003371	ENSG00000160293	VAV2	VAV-2	vav guanine nucleotide exchange factor 2	protein-coding
5792	chr17_KI270908v1_alt	7377	8387	+	17	NA	Intergenic	CpG	93007	NM_001385389	201176		NM_174919	ENSG00000159314	ARHGAP27	CAMGAP1|PP905|SH3D20|SH3P20	Rho GTPase activating protein 27	protein-coding
6787	chr19	56594928	56595867	+	17	NA	promoter-TSS (NM_001370215)	promoter-TSS (NM_001370215)	95	NM_001370215	58491		NM_021216	ENSG00000197951	ZNF71	EZFIT	zinc finger protein 71	protein-coding
7235	chr3	65018555	65019877	+	17	NA	Intergenic	Intergenic	-331216	NM_001318781	56999		NM_020249	ENSG00000163638	ADAMTS9	-	ADAM metallopeptidase with thrombospondin type 1 motif 9	protein-coding
6132	chr2	24884831	24885955	+	17	NA	intron (NM_001377132, intron 2 of 21)	intron (NM_001377132, intron 2 of 21)	1789	NM_001377131	109		NM_004036	ENSG00000138031	ADCY3	AC-III|AC3|BMIQ19	adenylate cyclase 3	protein-coding
6286	chr7	44036217	44037241	+	17	NA	non-coding (NR_024116, exon 5 of 9)	non-coding (NR_024116, exon 5 of 9)	-2320	NR_072981	255031		NR_015401		LINC00957	-	long intergenic non-protein coding RNA 957	ncRNA
7939	chr2	25399755	25401124	+	17	NA	intron (NM_183361, intron 14 of 17)	intron (NM_183361, intron 14 of 17)	-57849	NM_175629	1788		NM_022552	ENSG00000119772	DNMT3A	DNMT3A2|HESJAS|M.HsaIIIA|TBRS	DNA methyltransferase 3 alpha	protein-coding
5909	chr6	52664037	52664800	+	17	NA	promoter-TSS (NR_024405)	promoter-TSS (NR_024405)	17	NR_024405	730101		NR_024403	ENSG00000291006	LOC730101	-	uncharacterized LOC730101	ncRNA
5857-2	chrX	101051243	101052138	+	17	NA	5' UTR (NM_024917, exon 2 of 14)	5' UTR (NM_024917, exon 2 of 14)	421	NM_024917	79979		NM_024917	ENSG00000188917	TRMT2B	CXorf34|dJ341D10.3	tRNA methyltransferase 2 homolog B	protein-coding
7611	chr16	1300677	1301670	+	17	NA	Intergenic	Intergenic	-7979	NM_194260	7329		NM_003345	ENSG00000103275	UBE2I	C358B7.1|P18|UBC9	ubiquitin conjugating enzyme E2 I	protein-coding
8047	chr4	38727972	38729267	+	17	NA	Intergenic	Intergenic	54371	NM_001195108	81793		NM_030956	ENSG00000174123	TLR10	CD290	toll like receptor 10	protein-coding
6531	chr12	3756790	3757987	+	17	NA	Intergenic	Intergenic	-4279	NM_001144958	84766		NM_032680	ENSG00000130038	CRACR2A	EFCAB4B|RAB46	calcium release activated channel regulator 2A	protein-coding
6067-2	chr22	43812262	43812932	+	17	NA	promoter-TSS (NM_022785)	promoter-TSS (NM_022785)	-292	NM_022785	64800		NM_022785	ENSG00000186976	EFCAB6	DJBP|HSCBCIP1|dJ185D5.1	EF-hand calcium binding domain 6	protein-coding
5533-2	chr20	34300921	34301812	+	17	NA	intron (NM_001161766, intron 1 of 9)	intron (NM_001161766, intron 1 of 9)	1624	NM_001322085	191		NM_000687	ENSG00000101444	AHCY	SAHH|adoHcyase	adenosylhomocysteinase	protein-coding
5781-2	chr6	161536196	161536916	+	17	NA	intron (NM_013987, intron 8 of 10)	intron (NM_013987, intron 8 of 10)	65579	NR_134593	105378098		NR_134593		LOC105378098	-	uncharacterized LOC105378098	ncRNA
6133	chr17	7851390	7852194	+	17	NA	exon (NM_001080424, exon 17 of 22)	exon (NM_001080424, exon 17 of 22)	-3274	NM_203411	92162		NM_203411	ENSG00000167874	TMEM88	-	transmembrane protein 88	protein-coding
5276-2	chr17	44350728	44351464	+	17	NA	exon (NM_002087, exon 8 of 13)	exon (NM_002087, exon 8 of 13)	5794	NM_002087	2896		NM_002087	ENSG00000030582	GRN	CLN11|GEP|GP88|PCDGF|PEPI|PGRN	granulin precursor	protein-coding
5707	chr2	128090833	128091656	+	17	NA	promoter-TSS (NR_027671)	promoter-TSS (NR_027671)	44	NR_027671	56886		NM_020120	ENSG00000136731	UGGT1	HUGT1|UGCGL1|UGT1	UDP-glucose glycoprotein glucosyltransferase 1	protein-coding
8688	chr7	2241953	2243387	+	17	NA	promoter-TSS (NM_013393)	promoter-TSS (NM_013393)	-235	NM_198954	4521		NM_002452	ENSG00000106268	NUDT1	MTH1	nudix hydrolase 1	protein-coding
5364-2	chr8	100672407	100673028	+	17	NA	Intergenic	L2a|LINE|L2	-23052	NM_152628	169166		NM_152628	ENSG00000174226	SNX31	-	sorting nexin 31	protein-coding
6861	chr9	112764285	112765361	+	17	NA	intron (NM_001012994, intron 1 of 8)	intron (NM_001012994, intron 1 of 8)	14063	NM_001012994	401548		NM_001012994	ENSG00000148158	SNX30	ATG24A	sorting nexin family member 30	protein-coding
8915	chrX	147376428	147377423	+	17	NA	Intergenic	L1PA16|LINE|L1	-92197	NR_030239	574517		NR_030239	ENSG00000207866	MIR514A2	MIR514-2|MIRN514-2|hsa-mir-514a-2	microRNA 514a-2	ncRNA
7557	chr9	134060218	134062043	+	17	NA	intron (NM_007371, intron 1 of 11)	intron (NM_007371, intron 1 of 11)	6840	NR_135126	100130548		NR_135126	ENSG00000235138	LOC100130548	-	uncharacterized LOC100130548	ncRNA
7720	chr13	61144429	61145656	+	17	NA	Intergenic	MER52A|LTR|ERV1	54838	NR_036128	100422973		NR_036128	ENSG00000266663	MIR3169	-	microRNA 3169	ncRNA
5284	chr14	90288534	90289630	+	17	NA	exon (NM_017970, exon 11 of 14)	exon (NM_017970, exon 11 of 14)	31143	NM_001330212	5700		NM_002802	ENSG00000100764	PSMC1	NEDGTH|P26S4|RPT2|S4|p56	proteasome 26S subunit, ATPase 1	protein-coding
7397	chr19	46861401	46862651	+	17	NA	intron (NM_004491, intron 1 of 6)	intron (NM_004491, intron 1 of 6)	1029	NM_004491	2909		NM_004491	ENSG00000160007	ARHGAP35	GRF-1|GRLF1|P190-A|P190A|p190ARhoGAP|p190RhoGAP	Rho GTPase activating protein 35	protein-coding
6104	chr22	46595809	46596445	+	17	NA	intron (NM_001366660, intron 1 of 17)	intron (NM_001366660, intron 1 of 17)	19039	NM_001366660	23151		NM_015124	ENSG00000075240	GRAMD4	DIP	GRAM domain containing 4	protein-coding
6280	chr1	181088359	181089122	+	17	NA	promoter-TSS (NM_016545)	promoter-TSS (NM_016545)	40	NM_016545	51278		NM_016545	ENSG00000162783	IER5	SBBI48	immediate early response 5	protein-coding
6985	chr3	27369004	27369777	+	17	NA	promoter-TSS (NM_152534)	promoter-TSS (NM_152534)	-7	NM_199347	152110		NM_152534	ENSG00000163491	NEK10	CILD44	NIMA related kinase 10	protein-coding
7825	chr7	101739313	101740486	+	17	NA	Intergenic	Intergenic	-76108	NM_001202546	1523		NM_001913	ENSG00000257923	CUX1	CASP|CDP|CDP/Cut|CDP1|COY1|CUTL1|CUX|Clox|Cux/CDP|GDDI|GOLIM6|Nbla10317|p100|p110|p200|p75	cut like homeobox 1	protein-coding
6213	chr11	63813591	63814531	+	17	NA	intron (NM_138471, intron 1 of 5)	CpG	605	NM_138471	144097		NM_138471	ENSG00000168005	SPINDOC	C11orf84|SPIN-DOC	spindlin interactor and repressor of chromatin binding	protein-coding
5386-3	chr19	16456828	16457995	+	17	NA	intron (NM_021235, intron 1 of 22)	intron (NM_021235, intron 1 of 22)	14559	NM_001258374	58513		NM_021235	ENSG00000127527	EPS15L1	EPS15R	epidermal growth factor receptor pathway substrate 15 like 1	protein-coding
7258	chr2	9262395	9263986	+	17	NA	intron (NM_001135191, intron 1 of 26)	intron (NM_001135191, intron 1 of 26)	56378	NM_003887	8853		NM_003887	ENSG00000151693	ASAP2	AMAP2|CENTB3|DDEF2|PAG3|PAP|Pap-alpha|SHAG1	ArfGAP with SH3 domain, ankyrin repeat and PH domain 2	protein-coding
6215	chr1	15763991	15764964	+	17	NA	promoter-TSS (NM_001024215)	promoter-TSS (NM_001024215)	-22	NM_001024215	54751		NM_017556	ENSG00000162458	FBLIM1	CAL|FBLP-1|FBLP1	filamin binding LIM protein 1	protein-coding
5452	chr4	74933092	74933906	+	17	NA	intron (NM_015393, intron 1 of 3)	CpG	383	NM_015393	25849		NM_015393	ENSG00000169116	PARM1	Cipar1|DKFZP564O0823|PARM-1|WSC4	prostate androgen-regulated mucin-like protein 1	protein-coding
5570	chr16_KI270853v1_alt	875486	876100	+	17	NA	promoter-TSS (NR_036141).6	promoter-TSS (NR_036141).6	-88	NR_036144	100422836		NR_036144	ENSG00000266291	MIR3180-3	-	microRNA 3180-3	ncRNA
5724-2	chr13	41194187	41194846	+	17	NA	promoter-TSS (NM_032138)	promoter-TSS (NM_032138)	53	NM_032138	84078		NM_032138	ENSG00000120696	KBTBD7	-	kelch repeat and BTB domain containing 7	protein-coding
7061	chr11	116687711	116688559	+	17	NA	Intergenic	Intergenic	48713	NR_135069	101929011		NR_135069	ENSG00000237937	LINC02702	LASER	long intergenic non-protein coding RNA 2702	ncRNA
6460	chr1	42958633	42959528	+	17	NA	promoter-TSS (NR_033967)	promoter-TSS (NR_033967)	31	NR_033967	440584		NR_033967	ENSG00000227533	SLC2A1-DT	SLC2A1-AS1	SLC2A1 divergent transcript	ncRNA
7308	chr15	40911005	40912070	+	17	NA	Intergenic	Intergenic	4728	NR_135836	105370943		NR_135836		LOC105370943	-	uncharacterized LOC105370943	ncRNA
6220-2	chr15	75203663	75203729	+	17	NA	intron (NM_015492, intron 1 of 2)	intron (NM_015492, intron 1 of 2)	1814	NM_015492	56905		NM_015492	ENSG00000167173	C15orf39	-	chromosome 15 open reading frame 39	protein-coding
5604	chr16	2968543	2969307	+	17	NA	promoter-TSS (NM_001284512)	promoter-TSS (NM_001284512)	-423	NM_001284513	124222		NM_152341	ENSG00000162073	PAQR4	-	progestin and adipoQ receptor family member 4	protein-coding
6823-2	chr15	100715618	100716423	+	17	NA	Intergenic	Intergenic	113431	NM_198243	140460		NM_024708	ENSG00000183475	ASB7	-	ankyrin repeat and SOCS box containing 7	protein-coding
6292	chr14	54773046	54773934	+	17	NA	intron (NM_001161577, intron 4 of 8)	intron (NM_001161577, intron 4 of 8)	18657	NM_001161577	23034		NM_015589	ENSG00000020577	SAMD4A	SAMD4|SMAUG|SMAUG1|SMG|SMGA	sterile alpha motif domain containing 4A	protein-coding
5213	chr15	90158019	90158696	+	17	NA	Intergenic	Intergenic	-26563	NM_001324029	10509		NM_020210	ENSG00000185033	SEMA4B	SEMAC|SemC	semaphorin 4B	protein-coding
5565	chr5	70289738	70290306	+	17	NA	intron (NR_029426, intron 1 of 9).3	LTR12E|LTR|ERV1	155	NR_029426	11039		NM_006780		GUSBP14	SMA3|SMA4|b55C20.2	GUSB pseudogene 14	pseudo
5839	chr9	92114929	92115712	+	17	NA	promoter-TSS (NM_001368273)	promoter-TSS (NM_001368273)	93	NM_001368272	10558		NM_006415	ENSG00000090054	SPTLC1	ALS27|HSAN1|HSN1|LBC1|LCB1|SPT1|SPTI	serine palmitoyltransferase long chain base subunit 1	protein-coding
6072-2	chr22_KI270733v1_random	175164	175818	+	17	NA	Intergenic	LSU-rRNA_Hsa|rRNA|rRNA	1535	NR_146120	109864274		NR_146120		RNA5-8SN4	RN5-8S1|RNA5-8S5	RNA, 5.8S ribosomal N4	rRNA
7121	chr12	64610578	64611571	+	17	NA	intron (NR_040718, intron 1 of 3)	CpG	579	NM_178169	283349		NM_178169	ENSG00000153179	RASSF3	RASSF5	Ras association domain family member 3	protein-coding
9021	chr6	170080293	170081667	+	16	NA	Intergenic	Intergenic	-79662	NR_125878	102724511		NR_125878	ENSG00000232197	LOC102724511	-	uncharacterized LOC102724511	ncRNA
17680	chr1	156487888	156491615	+	16	NA	intron (NM_005920, intron 1 of 11)	intron (NM_005920, intron 1 of 11)	936	NM_001271629	4209		NM_005920	ENSG00000116604	MEF2D	-	myocyte enhancer factor 2D	protein-coding
6831-2	chr2	54330048	54331098	+	16	NA	promoter-TSS (NM_001100396)	promoter-TSS (NM_001100396)	-311	NM_001369401	129852		NM_173486	ENSG00000177994	C2orf73	-	chromosome 2 open reading frame 73	protein-coding
5329	chr5	70401438	70401955	+	16	NA	intron (NR_027386, intron 3 of 5).2	LTR12E|LTR|ERV1	-13609	NM_001364568	2966		NM_001515	ENSG00000145736	GTF2H2	BTF2|BTF2 p44|BTF2P44|T-BTF2P44|TFIIH|p44	general transcription factor IIH subunit 2	protein-coding
7247	chr12	116737770	116738665	+	16	NA	promoter-TSS (NM_024738)	promoter-TSS (NM_024738)	-74	NM_001109903	84900		NM_032814	ENSG00000135119	RNFT2	TMEM118	ring finger protein, transmembrane 2	protein-coding
5510	chr3	65878682	65879349	+	16	NA	intron (NR_145422, intron 2 of 2)	intron (NR_145422, intron 2 of 2)	-14801	NR_046575	100873983		NR_046575	ENSG00000240175	MAGI1-AS1	-	MAGI1 antisense RNA 1	ncRNA
5910	chr9	75890347	75891822	+	16	NA	non-coding (NR_120409, exon 1 of 20)	non-coding (NR_120409, exon 1 of 20)	411	NM_006200	5125		NM_006200	ENSG00000099139	PCSK5	PC5|PC6|PC6A|SPC6	proprotein convertase subtilisin/kexin type 5	protein-coding
9489	chr10	612759	614420	+	16	NA	intron (NM_014974, intron 1 of 36)	intron (NM_014974, intron 1 of 36)	-14975	NR_147612	101930421		NR_147612	ENSG00000225140	LOC101930421	-	uncharacterized LOC101930421	ncRNA
9619	chr19	12933104	12934210	+	16	NA	promoter-TSS (NM_004461)	promoter-TSS (NM_004461)	54	NM_004461	2193		NM_004461	ENSG00000179115	FARSA	CML33|FARSL|FARSLA|FRSA|PheHA|RILDBC2	phenylalanyl-tRNA synthetase subunit alpha	protein-coding
5563	chr1	18956742	18957588	+	16	NA	promoter-TSS (NM_001136265)	promoter-TSS (NM_001136265)	-489	NM_001136265	126917		NM_001136265	ENSG00000169991	IFFO2	-	intermediate filament family orphan 2	protein-coding
7395	chr7	100007413	100008708	+	16	NA	intron (NR_159960, intron 2 of 2)	MER66B|LTR|ERV1	-7492	NM_001346579	7586		NM_003439	ENSG00000106261	ZKSCAN1	KOX18|PHZ-37|ZNF139|ZNF36|ZSCAN33	zinc finger with KRAB and SCAN domains 1	protein-coding
10500	chr7	76303453	76305134	+	16	NA	TTS (NM_001540)	TTS (NM_001540)	1620	NM_001540	3315		NM_001540	ENSG00000106211	HSPB1	CMT2F|HEL-S-102|HMN2B|HMND3|HS.76067|HSP27|HSP28|Hsp25|SRP27	heat shock protein family B (small) member 1	protein-coding
9363	chr18	8703872	8705261	+	16	NA	promoter-TSS (NM_001378206)	promoter-TSS (NM_001378206)	-990	NM_001378207	23255		NM_015210	ENSG00000168502	MTCL1	CCDC165|KIAA0802|SOGA2	microtubule crosslinking factor 1	protein-coding
5509-2	chr3	177361544	177362142	+	16	NA	Intergenic	Intergenic	67401	NR_047465	100820709		NR_047465	ENSG00000203645	LINC00501	-	long intergenic non-protein coding RNA 501	ncRNA
5440	chr2	26503139	26504187	+	16	NA	intron (NM_194248, intron 6 of 46)	CpG	-25539	NM_004802	9381		NM_004802	ENSG00000115155	OTOF	AUNB1|DFNB6|DFNB9|FER1L2|NSRD9	otoferlin	protein-coding
5854-2	chr2	96638159	96638918	+	16	NA	promoter-TSS (NR_047656)	promoter-TSS (NR_047656)	-226	NM_001349259	55683		NM_017991	ENSG00000114982	KANSL3	KIAA1310|NSL3|Rcd1	KAT8 regulatory NSL complex subunit 3	protein-coding
6680	chrX	101348240	101349104	+	16	NA	promoter-TSS (NM_004085)	promoter-TSS (NM_004085)	70	NM_004085	1678		NM_004085	ENSG00000126953	TIMM8A	DDP|DDP1|DFN1|MTS|TIM8	translocase of inner mitochondrial membrane 8A	protein-coding
7735	chr7	97971548	97972590	+	16	NA	intron (NR_148008, intron 1 of 2)	CpG	289	NR_002822	389538		NR_002822		CCZ1P-OR7E38P	-	CCZ1P-OR7E38P readthrough	pseudo
11703	chr10	95516853	95518700	+	16	NA	intron (NM_001384456, intron 1 of 27)	intron (NM_001384456, intron 1 of 27)	43595	NM_001377201	10580		NM_006434	ENSG00000095637	SORBS1	CAP|FLAF2|R85FL|SH3D5|SH3P12|SORB1	sorbin and SH3 domain containing 1	protein-coding
7275	chr15	57431826	57432639	+	16	NA	intron (NM_001252335, intron 2 of 19)	intron (NM_001252335, intron 2 of 19)	55727	NM_032866	84952		NM_032866	ENSG00000128849	CGNL1	JACOP|PCING	cingulin like 1	protein-coding
5279-3	chr5	1204647	1205502	+	16	NA	intron (NM_001003841, intron 1 of 11)	intron (NM_001003841, intron 1 of 11)	3479	NM_001003841	340024		NM_001003841	ENSG00000174358	SLC6A19	B0AT1|HND	solute carrier family 6 member 19	protein-coding
5715-2	chr3	52197560	52198303	+	16	NA	promoter-TSS (NM_001304444)	promoter-TSS (NM_001304444)	-152	NM_199166	211		NM_000688	ENSG00000023330	ALAS1	ALAS|ALAS-H|ALAS3|ALASH|MIG4	5'-aminolevulinate synthase 1	protein-coding
5748-2	chr7	47501307	47501966	+	16	NA	intron (NM_022748, intron 3 of 30)	intron (NM_022748, intron 3 of 30)	-36833	NR_145813	109623468		NR_145813		SNORD151	-	small nucleolar RNA, C/D box 151	snoRNA
5373	chr19	35628504	35629451	+	16	NA	promoter-TSS (NM_001319113)	promoter-TSS (NM_001319113)	-39	NM_001319113	79171		NM_024321	ENSG00000126254	RBM42	-	RNA binding motif protein 42	protein-coding
5208	chr20	38446644	38447589	+	16	NA	promoter-TSS (NR_002972)	promoter-TSS (NR_002972)	462	NR_003239	128439		NM_139016	ENSG00000174365	SNHG11	C20orf198|LINC00101|NCRNA00101	small nucleolar RNA host gene 11	ncRNA
5854	chr10_KI270825v1_alt	95454	96424	+	16	NA	intron (NM_004747, intron 2 of 31)	intron (NM_004747, intron 2 of 31)	69508	NM_004747	9231		NM_004747	ENSG00000151208	DLG5	LP-DLG|P-DLG5|PDLG|YUVOB	discs large MAGUK scaffold protein 5	protein-coding
8136	chr9	38437063	38438082	+	16	NA	Intergenic	Intergenic	-13118	NM_001007563	347252		NM_001007563	ENSG00000137142	IGFBPL1	IGFBP-RP4|IGFBPRP4|bA113O24.1	insulin like growth factor binding protein like 1	protein-coding
6770	chr18	58105871	58106612	+	16	NA	intron (NM_001144964, intron 1 of 30)	intron (NM_001144964, intron 1 of 30)	-43079	NM_001144965	23327		NM_015277	ENSG00000049759	NEDD4L	NEDD4-2|NEDD4.2|PVNH7|RSP5|hNEDD4-2	NEDD4 like E3 ubiquitin protein ligase	protein-coding
5637	chr16	88939843	88940942	+	16	NA	intron (NR_168285, intron 1 of 1)	CpG	958	NM_175931	863		NM_005187	ENSG00000129993	CBFA2T3	ETO2|MTG16|MTGR2|RUNX1T3|ZMYND4	CBFA2/RUNX1 partner transcriptional co-repressor 3	protein-coding
7268	chr11	61732624	61733742	+	16	NA	intron (NM_006133, intron 9 of 19)	MIRb|SINE|MIR	-19453	NM_001127392	745		NM_013279	ENSG00000124920	MYRF	11orf9|C11orf9|CUGS|MMERV|MRF|Ndt80|pqn-47	myelin regulatory factor	protein-coding
7308-2	chr6	33585368	33586339	+	16	NA	TTS (NR_027908)	TTS (NR_027908)	2154	NR_028361	449520		NM_001005478	ENSG00000293518	GGNBP1	-	gametogenetin binding protein 1 (pseudogene)	pseudo
5246	chr11	6468954	6469605	+	16	NA	intron (NM_001248006, intron 1 of 11)	intron (NM_001248006, intron 1 of 11)	4662	NM_033278	10612		NM_006458	ENSG00000110171	TRIM3	BERP|HAC1|RNF22|RNF97	tripartite motif containing 3	protein-coding
7756	chr3	47411150	47412418	+	16	NA	exon (NM_015466, exon 21 of 25)	exon (NM_015466, exon 21 of 25)	30763	NM_015466	25930		NM_015466	ENSG00000076201	PTPN23	HD-PTP|HDPTP|NEDBASS|PTP-TD14	protein tyrosine phosphatase non-receptor type 23	protein-coding
9499	chr14	103111925	103113620	+	16	NA	Intergenic	Intergenic	10137	NR_138038	105370683		NR_138038	ENSG00000259717	LINC00677	C14orf74	long intergenic non-protein coding RNA 677	ncRNA
6169	chr11	66561168	66562056	+	16	NA	exon (NM_001258371, exon 17 of 21)	exon (NM_001258371, exon 17 of 21)	6994	NM_003793	8722		NM_003793	ENSG00000174080	CTSF	CATSF|CLN13	cathepsin F	protein-coding
5485	chr6	70099656	70100387	+	16	NA	intron (NM_001858, intron 15 of 50)	intron (NM_001858, intron 15 of 50)	183176	NM_078485	1297		NM_001851	ENSG00000112280	COL9A1	DJ149L1.1.2|EDM6|MED|STL4	collagen type IX alpha 1 chain	protein-coding
7451	chr17	4703792	4704743	+	16	NA	promoter-TSS (NR_103482)	promoter-TSS (NR_103482)	37	NR_103482	101559451		NR_103482	ENSG00000244184	PELP1-DT	-	PELP1 divergent transcript	ncRNA
5747-3	chr3	128435123	128435770	+	16	NA	Intergenic	Intergenic	-28148	NR_037890	285224		NR_037890	ENSG00000242049	DNAJB8-AS1	-	DNAJB8 antisense RNA 1	ncRNA
8378	chr20	44310260	44311586	+	16	NA	intron (NM_001080472, intron 1 of 1)	CpG	279	NM_001080472	128486		NM_001080472	ENSG00000197296	FITM2	C20orf142|Fit2|SIDDIS|dJ881L22.2	fat storage inducing transmembrane protein 2	protein-coding
5365	chr21	46229144	46230058	+	16	NA	promoter-TSS (NM_001001438)	promoter-TSS (NM_001001438)	370	NR_002776	114044		NM_018118	ENSG00000215424	MCM3AP-AS1	C21orf85|MCM3AP-AS|MCM3APAS|MCM3APASB|NCRNA00031	MCM3AP antisense RNA 1	ncRNA
5470	chr11	63916145	63916907	+	16	NA	5' UTR (NM_001363648, exon 1 of 11)	5' UTR (NM_001363648, exon 1 of 11)	638	NM_173587	283248		NM_173587	ENSG00000167771	RCOR2	-	REST corepressor 2	protein-coding
8388	chr20	57986801	57988103	+	16	NA	Intergenic	MIRc|SINE|MIR	-16452	NR_147083	105376992		NR_147083	ENSG00000275852	LINC01742	-	long intergenic non-protein coding RNA 1742	ncRNA
8823	chr18	46333223	46333888	+	16	NA	promoter-TSS (NM_001256758)	promoter-TSS (NM_001256758)	-463	NM_152470	494470		NM_152470	ENSG00000141622	ARK2C	ARKL2|RNF111L2|RNF165|lncAMPC	arkadia (RNF111) C-terminal like ring finger ubiquitin ligase 2C	protein-coding
7278	chr19	2336787	2338200	+	16	NA	exon (NM_001077238, exon 3 of 15)	exon (NM_001077238, exon 3 of 15)	8809	NM_001077238	56928		NM_152988	ENSG00000005206	SPPL2B	IMP-4|IMP4|PSH4|PSL1	signal peptide peptidase like 2B	protein-coding
5644-2	chr17	82494228	82494933	+	16	NA	Intergenic	Intergenic	-25152	NM_004514	3607		NM_004514	ENSG00000141568	FOXK2	ILF|ILF-1|ILF1|nGTBP	forkhead box K2	protein-coding
6552	chr17	42676147	42676987	+	16	NA	promoter-TSS (NR_073574)	promoter-TSS (NR_073574)	427	NM_024927	79990		NM_024927	ENSG00000068137	PLEKHH3	-	pleckstrin homology, MyTH4 and FERM domain containing H3	protein-coding
8976	chr19	29774745	29775822	+	16	NA	Intergenic	Intergenic	-36708	NM_001238	898		NM_001238	ENSG00000105173	CCNE1	CCNE|pCCNE1	cyclin E1	protein-coding
6692	chr7	128909838	128910744	+	16	NA	intron (NM_199349, intron 1 of 20)	intron (NM_199349, intron 1 of 20)	418	NM_199349	375616		NM_199349	ENSG00000135253	KCP	CRIM2|KCP1|NET67	kielin cysteine rich BMP regulator	protein-coding
5740	chr2	163084885	163086324	+	16	NA	Intergenic	LTR14B|LTR|ERVK	-246837	NM_033272	90134		NM_033272	ENSG00000184611	KCNH7	ERG3|HERG3|Kv11.3	potassium voltage-gated channel subfamily H member 7	protein-coding
7682	chr2	213922854	213924326	+	16	NA	intron (NM_024532, intron 11 of 15)	L1PA14|LINE|L1	165523	NR_039640	100616375		NR_039640	ENSG00000265734	MIR4438	-	microRNA 4438	ncRNA
6812	chr1	67764212	67764912	+	16	NA	intron (NM_018841, intron 2 of 3)	intron (NM_018841, intron 2 of 3)	-67726	NR_040077	100289178		NR_040077	ENSG00000232284	GNG12-AS1	-	GNG12, DIRAS3 and WLS antisense RNA 1	ncRNA
7520-2	chr6	111566349	111567454	+	16	NA	intron (NM_147686, intron 6 of 8)	intron (NM_147686, intron 6 of 8)	378	NM_001164283	10758		NM_147200	ENSG00000056972	TRAF3IP2	ACT1|C6orf2|C6orf4|C6orf5|C6orf6|CANDF8|CIKS|PSORS13	TRAF3 interacting protein 2	protein-coding
5724	chr1	41466109	41466818	+	16	NA	Intergenic	Intergenic	18220	NM_001956	1907		NM_001956	ENSG00000127129	EDN2	ET-2|ET2|PPET2	endothelin 2	protein-coding
7215	chr16	81633089	81634132	+	16	NA	intron (NM_030629, intron 3 of 20)	intron (NM_030629, intron 3 of 20)	22262	NR_106759	102465251		NR_106759	ENSG00000275109	MIR6504	hsa-mir-6504	microRNA 6504	ncRNA
6149	chr16	19348594	19349248	+	16	NA	Intergenic	Intergenic	-61618	NM_001308161	79838		NM_024780	ENSG00000103534	TMC5	-	transmembrane channel like 5	protein-coding
7242	chr15	67106707	67107884	+	16	NA	intron (NM_005902, intron 1 of 8)	intron (NM_005902, intron 1 of 8)	-18421	NM_001145102	4088		NM_005902	ENSG00000166949	SMAD3	HSPC193|HsT17436|JV15-2|LDS1C|LDS3|MADH3|hMAD-3|hSMAD3|mad3	SMAD family member 3	protein-coding
6125	chr20	50038343	50039049	+	16	NA	Intergenic	Intergenic	2933	NR_051976	100887755		NR_051976		TRERNA1	LINC00651|treRNA	translation regulatory long non-coding RNA 1	ncRNA
6725	chr17	8117648	8119213	+	16	NA	promoter-TSS (NM_001369446)	promoter-TSS (NM_001369446)	84	NM_021628	59344		NM_021628	ENSG00000179148	ALOXE3	ARCI3|E-LOX|LI5|eLOX-3|eLOX3	arachidonate lipoxygenase 3	protein-coding
6929	chr3	45841312	45842196	+	16	NA	intron (NM_001276378, intron 3 of 11)	CpG	365	NM_020347	54585		NM_020347	ENSG00000163818	LZTFL1	BBS17	leucine zipper transcription factor like 1	protein-coding
7928	chr1	34825135	34826122	+	16	NA	Intergenic	Intergenic	32629	NM_002060	2701		NM_002060	ENSG00000187513	GJA4	CX37	gap junction protein alpha 4	protein-coding
7226	chr7	66075468	66076436	+	16	NA	5' UTR (NM_001024944, exon 1 of 15)	5' UTR (NM_001024944, exon 1 of 15)	133	NM_001024946	435		NM_000048	ENSG00000126522	ASL	ASAL	argininosuccinate lyase	protein-coding
7434	chr16	85627157	85628169	+	16	NA	intron (NM_001278184, intron 1 of 14)	intron (NM_001278184, intron 1 of 14)	14341	NM_014615	23199		NM_014615	ENSG00000131149	GSE1	CRHSP24|KIAA0182	Gse1 coiled-coil protein	protein-coding
6593	chr9	126670912	126672414	+	16	NA	intron (NM_001174147, intron 2 of 7)	CpG	57735	NM_001174147	4010		NM_002316	ENSG00000136944	LMX1B	FSGS10|LMX1.2|NPS1	LIM homeobox transcription factor 1 beta	protein-coding
6283	chr1	27521988	27523353	+	16	NA	Intergenic	Intergenic	-32503	NM_001201404	10163		NM_006990	ENSG00000158195	WASF2	IMD2|SCAR2|WASF4|WAVE2|dJ393P12.2	WASP family member 2	protein-coding
5319-2	chr17	15562967	15563600	+	16	NA	intron (NR_037924, intron 1 of 5)	CpG	200	NM_001204478	100533496		NM_001204478	ENSG00000259024	TVP23C-CDRT4	FAM18B2|FAM18B2-CDRT4|TVP23C	TVP23C-CDRT4 readthrough	protein-coding
5502	chr13	32255057	32255955	+	16	NA	intron (NM_023037, intron 51 of 60)	intron (NM_023037, intron 51 of 60)	59857	NM_001136571	646799		NM_001136571	ENSG00000189167	ZAR1L	Z3CXXC7|ZAR2	zygote arrest 1 like	protein-coding
5671	chr4	88935975	88936671	+	16	NA	intron (NM_014883, intron 5 of 23)	MSTB|LTR|ERVL-MaLR	-112962	NM_001015045	10144		NM_014883	ENSG00000138640	FAM13A	ARHGAP48|FAM13A1	family with sequence similarity 13 member A	protein-coding
7112	chr10	79138989	79140214	+	16	NA	intron (NM_020338, intron 2 of 24)	intron (NM_020338, intron 2 of 24)	70635	NM_020338	57178		NM_020338	ENSG00000108175	ZMIZ1	MIZ|NEDDFSA|RAI17|TRAFIP10|ZIMP10	zinc finger MIZ-type containing 1	protein-coding
6623	chr6	35452015	35453005	+	16	NA	5' UTR (NM_021922, exon 1 of 10)	5' UTR (NM_021922, exon 1 of 10)	172	NM_021922	2178		NM_021922	ENSG00000112039	FANCE	FACE|FAE	FA complementation group E	protein-coding
5228-2	chr3	25782937	25783569	+	16	NA	intron (NM_001145294, intron 1 of 11)	CpG	190	NM_018297	55768		NM_018297	ENSG00000151092	NGLY1	CDDG|CDG1V|PNG-1|PNG1|PNGase	N-glycanase 1	protein-coding
5251-2	chr18	24271016	24271899	+	16	NA	intron (NM_080597, intron 15 of 27)	CpG	775	NM_018030	114876		NM_018030	ENSG00000141447	OSBPL1A	ORP-1|ORP1|OSBPL1B	oxysterol binding protein like 1A	protein-coding
7718	chr1	183149364	183150159	+	16	NA	Intergenic	Intergenic	-8491	NR_149048	110841583		NR_149048	ENSG00000224468	LAMC1-AS1	lnc-LAMC2-1:1	LAMC1 antisense RNA 1	ncRNA
5733-2	chr4	2800663	2801544	+	16	NA	intron (NM_001122681, intron 1 of 12)	intron (NM_001122681, intron 1 of 12)	8018	NM_001122681	6452		NM_003023	ENSG00000087266	SH3BP2	3BP-2|3BP2|CRBM|CRPM|RES4-23	SH3 domain binding protein 2	protein-coding
12190	chr20	34068268	34070327	+	16	NA	intron (NM_016732, intron 2 of 9)	intron (NM_016732, intron 2 of 9)	20178	NR_039911	100616434		NR_039911	ENSG00000264616	MIR4755	mir-4755	microRNA 4755	ncRNA
5931-2	chr17	15966040	15967185	+	16	NA	intron (NM_000676, intron 1 of 1)	intron (NM_000676, intron 1 of 1)	21695	NM_000676	136		NM_000676	ENSG00000170425	ADORA2B	ADORA2	adenosine A2b receptor	protein-coding
7441	chr10	103553050	103554506	+	16	NA	intron (NM_004210, intron 1 of 5)	intron (NM_004210, intron 1 of 5)	-36336	NR_120675	102724341		NR_120675	ENSG00000235470	NEURL1-AS1	-	NEURL1 antisense RNA 1	ncRNA
6461	chr7	137987378	137987430	+	16	NA	intron (NM_001253775, intron 1 of 3)	(A)n|Simple_repeat|Simple_repeat	14682	NM_001253775	64764		NM_194071	ENSG00000182158	CREB3L2	BBF2H7	cAMP responsive element binding protein 3 like 2	protein-coding
5716	chr2	101106472	101107427	+	16	NA	intron (NM_001330348, intron 1 of 19)	Tigger5b|DNA|TcMar-Tigger	44433	NM_001330348	11138		NM_007063	ENSG00000204634	TBC1D8	AD3|GRAMD8|HBLP1|TBC1D8A|VRP	TBC1 domain family member 8	protein-coding
7575	chr3	197598746	197599746	+	16	NA	Intergenic	Intergenic	-25923	NM_203315	622		NM_004051	ENSG00000161267	BDH1	BDH|SDR9C1	3-hydroxybutyrate dehydrogenase 1	protein-coding
6363	chr22	24181413	24182753	+	16	NA	intron (NM_019601, intron 1 of 14)	intron (NM_019601, intron 1 of 14)	596	NM_019601	56241		NM_019601	ENSG00000099994	SUSD2	BK65A6.2|W5C5	sushi domain containing 2	protein-coding
5542	chr17	42866217	42867058	+	16	NA	promoter-TSS (NR_002773)	promoter-TSS (NR_002773)	-508	NR_002773	90586		NR_002773	ENSG00000291070	AOC4P	AOC4|UPAT	amine oxidase copper containing 4, pseudogene	pseudo
5242	chr3	169769370	169770109	+	16	NA	promoter-TSS (NM_032487)	promoter-TSS (NM_032487)	-178	NM_032487	84517		NM_032487	ENSG00000184378	ACTRT3	ARP-T3|ARPM1	actin related protein T3	protein-coding
12115	chr11	46278039	46279692	+	16	NA	intron (NM_052854, intron 1 of 11)	intron (NM_052854, intron 1 of 11)	1203	NM_052854	90993		NM_052854	ENSG00000157613	CREB3L1	C16DELp11.2|DEL16p11.2|OASIS|OI16	cAMP responsive element binding protein 3 like 1	protein-coding
9210	chr19	47427403	47428539	+	16	NA	TTS (NM_015063)	TTS (NM_015063)	-5738	NM_001346148	56917		NM_020160	ENSG00000105419	MEIS3	MRG2	Meis homeobox 3	protein-coding
5414	chr12	95204205	95204787	+	16	NA	intron (NM_018351, intron 2 of 20)	intron (NM_018351, intron 2 of 20)	12971	NM_018351	55785		NM_018351	ENSG00000180263	FGD6	ZFYVE24	FYVE, RhoGEF and PH domain containing 6	protein-coding
5263-2	chr20	31879267	31880015	+	16	NA	promoter-TSS (NM_001367620)	promoter-TSS (NM_001367620)	-176	NR_160277	164395		NM_001008409	ENSG00000131044	TTLL9	C20orf125	tubulin tyrosine ligase like 9	protein-coding
5372	chr2	119480339	119481339	+	16	NA	intron (NM_002980, intron 2 of 12)	intron (NM_002980, intron 2 of 12)	4385	NR_147847	107105282		NR_147846	ENSG00000231013	SCTR-AS1	-	SCTR antisense RNA 1	ncRNA
6227	chr6	33787807	33788537	+	16	NA	intron (NM_001348709, intron 1 of 8)	intron (NM_001348709, intron 1 of 8)	958	NM_001348710	221496		NM_181336	ENSG00000161904	LEMD2	CTRCT42|LEM2|MARUPS|NET25|dJ482C21.1	LEM domain nuclear envelope protein 2	protein-coding
5624	chr10	95513079	95513971	+	15	NA	intron (NM_001384456, intron 1 of 27)	intron (NM_001384456, intron 1 of 27)	47846	NM_001377201	10580		NM_006434	ENSG00000095637	SORBS1	CAP|FLAF2|R85FL|SH3D5|SH3P12|SORB1	sorbin and SH3 domain containing 1	protein-coding
6442	chr1	155139983	155140797	+	15	NA	promoter-TSS (NM_018973)	promoter-TSS (NM_018973)	17	NM_018973	54344		NM_018973	ENSG00000179085	DPM3	CDG1O|MDDGB15|MDDGC15	dolichyl-phosphate mannosyltransferase subunit 3, regulatory	protein-coding
9141	chr17	64836381	64837912	+	15	NA	promoter-TSS (NR_024386)	promoter-TSS (NR_024386)	38	NR_024386	440456		NR_024386	ENSG00000291117	PLEKHM1P1	PLEKHM1P	pleckstrin homology and RUN domain containing M1 pseudogene 1	pseudo
6769	chr18	62450199	62451484	+	15	NA	Intergenic	Intergenic	-72184	NR_126534	54877		NM_017742	ENSG00000141664	ZCCHC2	C18orf49	zinc finger CCHC-type containing 2	protein-coding
7520	chr22	30288997	30290328	+	15	NA	promoter-TSS (NM_001037666)	promoter-TSS (NM_001037666)	-157	NM_001037666	652968		NM_001037666	ENSG00000239282	CASTOR1	GATSL3	cytosolic arginine sensor for mTORC1 subunit 1	protein-coding
6908	chr8	72874257	72875366	+	15	NA	intron (NM_004770, intron 2 of 2)	intron (NM_004770, intron 2 of 2)	-134053	NM_003218	7013		NM_003218	ENSG00000147601	TERF1	PIN2|TRBF1|TRF|TRF1|hTRF1-AS|t-TRF1	telomeric repeat binding factor 1	protein-coding
5784	chr8	28622715	28623410	+	15	NA	Intergenic	CpG	78402	NR_126027	101929402		NR_126027	ENSG00000246339	EXTL3-AS1	C8orf50	EXTL3 antisense RNA 1	ncRNA
8176	chr3	46845442	46846434	+	15	NA	Intergenic	Intergenic	-11843	NR_160554	339906		NM_182702	ENSG00000293419	PRSS42P	PRSS42|TESSP2	serine protease 42, pseudogene	pseudo
9854	chr11	117457236	117459135	+	15	NA	intron (NM_020693, intron 19 of 32)	intron (NM_020693, intron 19 of 32)	130331	NM_014956	22897		NM_014956	ENSG00000110274	CEP164	NPHP15	centrosomal protein 164	protein-coding
6121	chr14	74500777	74501902	+	15	NA	intron (NM_000428, intron 35 of 35)	intron (NM_000428, intron 35 of 35)	7574	NM_194279	122961		NM_194279	ENSG00000165898	ISCA2	HBLD1|ISA2|MMDS4|c14_5557	iron-sulfur cluster assembly 2	protein-coding
6247	chr21	6997007	6997860	+	15	NA	Intergenic	G-rich|Low_complexity|Low_complexity	-51426	NM_001322047	102724843		NM_001322047	ENSG00000277067	LOC102724843	-	uncharacterized LOC102724843	ncRNA
6115	chr2	96501526	96502673	+	15	NA	intron (NR_104346, intron 1 of 3)	intron (NR_104346, intron 1 of 3)	3258	NM_001285486	93082		NM_001080535	ENSG00000163121	NEURL3	LINCR|RNF132	neuralized E3 ubiquitin protein ligase 3	protein-coding
6940	chr6	107490490	107491577	+	15	NA	intron (NM_018013, intron 1 of 6)	intron (NM_018013, intron 1 of 6)	916	NM_018013	55084		NM_018013	ENSG00000112320	SOBP	JXC1|MRAMS	sine oculis binding protein homolog	protein-coding
10411	chr17	2925439	2926641	+	15	NA	intron (NM_001100398, intron 3 of 23)	AluSx1|SINE|Alu	39855	NR_110818	101927911		NR_110818	ENSG00000262884	LOC101927911	-	uncharacterized LOC101927911	ncRNA
5953-2	chr6	115058848	115059538	+	15	NA	Intergenic	MER57B2|LTR|ERV1	584642	NR_134602	105377962		NR_134602	ENSG00000228777	LINC02534	-	long intergenic non-protein coding RNA 2534	ncRNA
6414	chr9	94918022	94918830	+	15	NA	intron (NM_032823, intron 5 of 14)	intron (NM_032823, intron 5 of 14)	27128	NR_147614	101928119		NR_147613		LOC101928119	-	uncharacterized LOC101928119	ncRNA
6422-2	chrX	84501768	84502573	+	15	NA	intron (NM_001177478, intron 1 of 9)	intron (NM_001177478, intron 1 of 9)	283	NM_001177479	139324		NM_144657	ENSG00000165259	HDX	CXorf43|D030011N01Rik	highly divergent homeobox	protein-coding
9404	chr7	44189180	44190299	+	15	NA	promoter-TSS (NM_001354800)	promoter-TSS (NM_001354800)	-300	NM_001354800	2645		NM_000162	ENSG00000106633	GCK	FGQTL3|GK|GLK|HHF3|HK4|HKIV|HXKP|LGLK|MODY2|PNDM1	glucokinase	protein-coding
11801	chr17	41972313	41973948	+	15	NA	intron (NM_033133, intron 3 of 3)	MIR|SINE|MIR	5333	NM_001330216	1267		NM_033133	ENSG00000173786	CNP	CNP1|HLD20	2',3'-cyclic nucleotide 3' phosphodiesterase	protein-coding
6918	chr3	160885421	160886476	+	15	NA	intron (NR_134243, intron 2 of 5)	L1PA7|LINE|L1	15350	NR_134243	151742		NM_139245	ENSG00000163590	PPM1L	PP2C-epsilon|PP2CE|PPM1-LIKE	protein phosphatase, Mg2+/Mn2+ dependent 1L	protein-coding
10772	chr4	139984696	139986299	+	15	NA	intron (NM_018717, intron 1 of 4)	intron (NM_018717, intron 1 of 4)	-142518	NR_147610	101927516		NR_147610		LOC101927516	-	uncharacterized LOC101927516	ncRNA
5216	chr11	111330426	111331175	+	15	NA	Intergenic	Intergenic	-16957	NR_039712	100616330		NR_039712	ENSG00000264032	MIR4491	mir-4491	microRNA 4491	ncRNA
5410	chr6	131627563	131628459	+	15	NA	exon (NM_015979, exon 1 of 31)	exon (NM_015979, exon 1 of 31)	231	NM_001376517	9439		NM_004830	ENSG00000112282	MED23	ARC130|CRSP130|CRSP133|CRSP3|DRIP130|MRT18|SUR-2|SUR2	mediator complex subunit 23	protein-coding
5358	chr2	47273264	47273964	+	15	NA	intron (NR_110207, intron 1 of 2)	L2a|LINE|L2	-61701	NR_001568	618		NR_001568	ENSG00000236824	BCYRN1	BC200|BC200a|LINC00004|NCRNA00004	brain cytoplasmic RNA 1	ncRNA
5421-2	chr2	175913685	175914734	+	15	NA	Intergenic	L1P3|LINE|L1	88058	NM_030650	80856		NM_030650	ENSG00000144320	LNPK	KIAA1715|LNP|LNP1|NEDEHCC|Ul|ulnaless	lunapark, ER junction formation factor	protein-coding
7119	chr15	77526978	77527761	+	15	NA	intron (NR_135692, intron 1 of 1)	intron (NR_135692, intron 1 of 1)	1774	NR_135692	101929457		NR_135692	ENSG00000259362	LOC101929457	-	uncharacterized LOC101929457	ncRNA
6064-2	chr5	76715977	76716704	+	15	NA	exon (NM_001992, exon 1 of 2)	exon (NM_001992, exon 1 of 2)	214	NM_001992	2149		NM_001992	ENSG00000181104	F2R	CF2R|HTR|PAR-1|PAR1|TR	coagulation factor II thrombin receptor	protein-coding
5687	chr1	151013010	151014174	+	15	NA	intron (NR_130130, intron 1 of 3)	intron (NR_130130, intron 1 of 3)	5143	NR_130130	58497		NM_021222	ENSG00000143363	PRUNE1	DRES-17|DRES17|H-PRUNE|HTCD37|NMIHBA|PRUNE	prune exopolyphosphatase 1	protein-coding
5806	chr3	20040597	20042005	+	15	NA	intron (NM_003884, intron 1 of 17)	intron (NM_003884, intron 1 of 17)	855	NM_003884	8850		NM_003884	ENSG00000114166	KAT2B	CAF|P/CAF|PCAF	lysine acetyltransferase 2B	protein-coding
7528	chr17	42547762	42549160	+	15	NA	Intergenic	CpG	-4462	NM_001330219	3292		NM_000413	ENSG00000108786	HSD17B1	17-beta-HSD|20-alpha-HSD|E2DH|EDH17B2|EDHB17|HSD17|SDR28C1	hydroxysteroid 17-beta dehydrogenase 1	protein-coding
5613	chr2	97662623	97663595	+	15	NA	intron (NM_005735, intron 1 of 10)	intron (NM_005735, intron 1 of 10)	935	NM_005735	10120		NM_005735	ENSG00000115073	ACTR1B	ARP1B|CTRN2|PC3	actin related protein 1B	protein-coding
7195	chr2	21197162	21198246	+	15	NA	Intergenic	Intergenic	73736	NM_001306137	100129278		NM_001306137	ENSG00000218819	TDRD15	-	tudor domain containing 15	protein-coding
7779	chr3	39190424	39191637	+	15	NA	intron (NM_194293, intron 1 of 1)	intron (NM_194293, intron 1 of 1)	1565	NM_194293	165904		NM_194293	ENSG00000168334	XIRP1	CMYA1|Xin	xin actin binding repeat containing 1	protein-coding
6236-2	chr8	141401271	141402571	+	15	NA	intron (NM_032611, intron 1 of 5).2	intron (NM_032611, intron 1 of 5).2	9900	NM_032611	11156		NM_007079	ENSG00000184489	PTP4A3	PRL-3|PRL-R|PRL3	protein tyrosine phosphatase 4A3	protein-coding
8928	chr2	85589684	85591960	+	15	NA	intron (NM_006634, intron 1 of 2)	intron (NM_006634, intron 1 of 2)	-4923	NM_016494	51255		NM_016494	ENSG00000168894	RNF181	HSPC238	ring finger protein 181	protein-coding
6170	chr2	74373736	74375183	+	15	NA	5' UTR (NM_023019, exon 1 of 27)	5' UTR (NM_023019, exon 1 of 27)	208	NM_001135041	1639		NM_004082	ENSG00000204843	DCTN1	DAP-150|DP-150|HMND14|P135	dynactin subunit 1	protein-coding
5715	chr16	680875	682144	+	15	NA	TTS (NM_001323920)	TTS (NM_001323920)	1099	NM_005861	10273		NM_005861	ENSG00000103266	STUB1	CHIP|HSPABP2|NY-CO-7|SCA48|SCAR16|SDCCAG7|UBOX1	STIP1 homology and U-box containing protein 1	protein-coding
6047	chr1	236064778	236065873	+	15	NA	promoter-TSS (NM_002508)	promoter-TSS (NM_002508)	-235	NM_002508	4811		NM_002508	ENSG00000116962	NID1	NID	nidogen 1	protein-coding
5929-3	chr8	41625163	41626021	+	15	NA	TTS (NM_001363198)	TTS (NM_001363198)	21767	NM_152568	157848		NM_152568	ENSG00000165066	NKX6-3	NKX6.3	NK6 homeobox 3	protein-coding
5989	chr6	44223764	44224431	+	15	NA	intron (NM_001078177, intron 1 of 13)	CpG	502	NM_001078175	2030		NM_004955	ENSG00000112759	SLC29A1	AUG|ENT1|hENT1	solute carrier family 29 member 1 (Augustine blood group)	protein-coding
6126	chr14	20613291	20614127	+	15	NA	Intergenic	Intergenic	-22886	NM_001024822	493901		NM_001024822	ENSG00000258436	RNASE12	HEL-S-85p|RAI1	ribonuclease A family member 12 (inactive)	protein-coding
6493	chr22	23259786	23260836	+	15	NA	intron (NM_021574, intron 2 of 21)	intron (NM_021574, intron 2 of 21)	-2456	NR_033408	26226		NM_012165	ENSG00000230701	FBXW4P1	FBW3|FBXW3|SHFM3P1	F-box and WD repeat domain containing 4 pseudogene 1	pseudo
6826	chr11	61488498	61489445	+	15	NA	intron (NM_145017, intron 11 of 13)	L2b|LINE|L2	7851	NM_145017	220004		NM_145017	ENSG00000162148	SAXO4	C11orf66|IIIG9|PPP1R32	stabilizer of axonemal microtubules 4	protein-coding
5692	chr11	108664741	108665697	+	15	NA	exon (NM_004398, exon 1 of 18)	exon (NM_004398, exon 1 of 18)	150	NM_004398	1662		NM_004398	ENSG00000178105	DDX10	Dbp4|HRH-J8	DEAD-box helicase 10	protein-coding
7335	chr1_GL383519v1_alt	66433	67807	+	15	NA	TTS (NM_003993)	TTS (NM_003993)	263	NM_052837	10067		NM_005698	ENSG00000116521	SCAMP3	C1orf3	secretory carrier membrane protein 3	protein-coding
7188	chr3	58067861	58068939	+	15	NA	intron (NM_001164319, intron 1 of 44)	intron (NM_001164319, intron 1 of 44)	59978	NM_001457	2317		NM_001457	ENSG00000136068	FLNB	ABP-278|ABP-280|AOI|FH1|FLN-B|FLN1L|LRS1|SCT|TABP|TAP	filamin B	protein-coding
6539	chr1	181778550	181779784	+	15	NA	intron (NM_001205294, intron 37 of 45)	intron (NM_001205294, intron 37 of 45)	282545	NM_001009992	127665		NM_001009992	ENSG00000179930	ZNF648	-	zinc finger protein 648	protein-coding
8478	chr19	39996480	39997781	+	15	NA	promoter-TSS (NM_001297763)	promoter-TSS (NM_001297763)	70	NM_178544	339327		NM_178544	ENSG00000187187	ZNF546	ZNF49	zinc finger protein 546	protein-coding
7666	chr3	53162325	53163606	+	15	NA	intron (NM_001316327, intron 1 of 18)	intron (NM_001316327, intron 1 of 18)	1458	NM_001316327	5580		NM_006254	ENSG00000163932	PRKCD	ALPS3|CVID9|MAY1|PKCD|nPKC-delta	protein kinase C delta	protein-coding
9078	chr11	68396077	68397777	+	15	NA	intron (NM_002335, intron 7 of 22)	intron (NM_002335, intron 7 of 22)	-63825	NM_001352366	55291		NM_018312	ENSG00000110075	PPP6R3	C11orf23|PP6R3|SAP190|SAPL|SAPLa|SAPS3	protein phosphatase 6 regulatory subunit 3	protein-coding
5222	chr14	73771637	73772194	+	15	NA	intron (NM_001043318, intron 1 of 11)	intron (NM_001043318, intron 1 of 11)	-11612	NM_001367710	91748		NM_194278	ENSG00000156030	MIDEAS	C14orf117|C14orf43|ELMSAN1|LSR68|c14_5541	mitotic deacetylase associated SANT domain protein	protein-coding
5280	chr15_KI270849v1_alt	107211	107994	+	15	NA	Intergenic	LTR13|LTR|ERVK	47697	NM_001301144	140691		NM_080745	ENSG00000185880	TRIM69	HSD-34|HSD34|RNF36|Trif	tripartite motif containing 69	protein-coding
8435	chr17	17786548	17788237	+	15	NA	intron (NM_030665, intron 2 of 5)	intron (NM_030665, intron 2 of 5)	-7863	NR_024007	140771		NM_144774	ENSG00000226746	SMCR5	NCRNA00034	Smith-Magenis syndrome chromosome region, candidate 5	ncRNA
5747	chr1	36187653	36188713	+	15	NA	Intergenic	Intergenic	32023	NM_001286365	55700		NM_018067	ENSG00000116871	MAP7D1	PARCC1|RPRC1	MAP7 domain containing 1	protein-coding
5306	chr1	3068532	3068561	+	15	NA	promoter-TSS (NR_015440)	promoter-TSS (NR_015440)	-657	NM_199454	63976		NM_022114	ENSG00000142611	PRDM16	CMD1LL|KMT8F|LVNC8|MEL1|PFM13	PR/SET domain 16	protein-coding
5345	chr5	39716255	39717003	+	15	NA	Intergenic	LTR33|LTR|ERVL	196198	NR_104632	101926940		NR_104632	ENSG00000271334	LINC02104	-	long intergenic non-protein coding RNA 2104	ncRNA
6208	chr10	112729434	112730272	+	15	NA	intron (NM_001365713, intron 8 of 8)	intron (NM_001365713, intron 8 of 8)	-93643	NR_120684	103344931		NR_120684	ENSG00000260917	LOC103344931	-	uncharacterized LOC103344931	ncRNA
6744	chr1	21261671	21262703	+	15	NA	intron (NM_001397, intron 4 of 18)	intron (NM_001397, intron 4 of 18)	17428	NM_001113347	1889		NM_001397	ENSG00000117298	ECE1	ECE	endothelin converting enzyme 1	protein-coding
6787-2	chr6	14903321	14904359	+	15	NA	Intergenic	MIRb|SINE|MIR	-342229	NM_004973	3720		NM_004973	ENSG00000008083	JARID2	DIDDF|JMJ	jumonji and AT-rich interaction domain containing 2	protein-coding
6864	chr8	41333654	41335204	+	15	NA	Intergenic	Intergenic	-24956	NM_003012	6422		NM_003012	ENSG00000104332	SFRP1	FRP|FRP-1|FRP1|FrzA|SARP2	secreted frizzled related protein 1	protein-coding
7717	chr14	104865751	104866742	+	15	NA	TTS (NR_162135)	TTS (NR_162135)	932	NR_162135	113219454		NR_162135		MIR12121	-	microRNA 12121	ncRNA
7357	chr6	158475068	158475861	+	15	NA	intron (NM_001007466, intron 6 of 12)	intron (NM_001007466, intron 6 of 12)	-61176	NM_001376856	57583		NM_020823	ENSG00000146433	TMEM181	GPR178|KIAA1423	transmembrane protein 181	protein-coding
6960	chr10	122173273	122174424	+	15	NA	intron (NM_206860, intron 1 of 15)	intron (NM_206860, intron 1 of 15)	10218	NM_206860	10579		NM_006997	ENSG00000138162	TACC2	AZU-1|ECTACC	transforming acidic coiled-coil containing protein 2	protein-coding
5838	chr10	75099989	75101075	+	15	NA	intron (NM_001007272, intron 1 of 3)	intron (NM_001007272, intron 1 of 3)	-1042	NM_016364	51207		NM_016364	ENSG00000079393	DUSP13B	DUSP13|MDSP|SKRP4|TMDP	dual specificity phosphatase 13B	protein-coding
5988	chr6	87322427	87322928	+	15	NA	promoter-TSS (NM_020425)	promoter-TSS (NM_020425)	89	NM_001042493	57150		NM_020425	ENSG00000111850	SMIM8	C6orf162|dJ102H19.2	small integral membrane protein 8	protein-coding
6194	chr6	107661171	107662622	+	15	NA	TTS (NM_018013)	TTS (NM_018013)	70254	NM_001286409	256380		NM_198081	ENSG00000146285	SCML4	dJ47M23.1	Scm polycomb group protein like 4	protein-coding
5930	chr9	136362963	136363571	+	15	NA	TTS (NM_052814)	TTS (NM_052814)	477	NM_001080849	728489		NM_001080849	ENSG00000213221	DNLZ	C9orf151|HEP|HEP1|TIMM15|ZIM17|bA413M3.2	DNL-type zinc finger	protein-coding
6603	chr9	127857496	127858680	+	15	NA	Intergenic	LTR33|LTR|ERVL	-3315	NM_000118	2022		NM_000118	ENSG00000106991	ENG	END|HHT1|ORW1	endoglin	protein-coding
6684	chr2	62195284	62196041	+	15	NA	promoter-TSS (NM_006577)	promoter-TSS (NM_006577)	-453	NM_006577	10678		NM_006577	ENSG00000170340	B3GNT2	3-Gn-T1|3-Gn-T2|B3GN-T2|B3GNT|B3GNT-2|B3GNT1|BETA3GNT|BGNT2|BGnT-2|beta-1|beta3Gn-T1|beta3Gn-T2	UDP-GlcNAc:betaGal beta-1,3-N-acetylglucosaminyltransferase 2	protein-coding
9385-2	chr9	18759742	18761133	+	15	NA	intron (NM_001040272, intron 16 of 28)	MER103C|DNA|hAT-Charlie	187131	NR_036107	100422869		NR_036107	ENSG00000264638	MIR3152	-	microRNA 3152	ncRNA
8031	chr1	161466116	161467774	+	15	NA	Intergenic	CpG	-38512	NM_021642	2212		NM_021642	ENSG00000143226	FCGR2A	CD32|CD32A|CDw32|FCG2|FCGR2|FCGR2A1|FcGR|FcgammaRIIa|IGFR2	Fc gamma receptor IIa	protein-coding
5874	chr9	101478493	101479462	+	15	NA	intron (NM_032342, intron 1 of 1)	intron (NM_032342, intron 1 of 1)	7491	NM_001371233	84302		NM_032342	ENSG00000165152	PGAP4	C9orf125|TMEM246	post-GPI attachment to proteins GalNAc transferase 4	protein-coding
5867	chr19	1478796	1479968	+	15	NA	promoter-TSS (NM_152482)	promoter-TSS (NM_152482)	-167	NM_152482	148223		NM_152482	ENSG00000119559	C19orf25	-	chromosome 19 open reading frame 25	protein-coding
6881	chr11	65353740	65354755	+	15	NA	promoter-TSS (NM_145719)	promoter-TSS (NM_145719)	-504	NM_145719	220359		NM_145719	ENSG00000173825	TIGD3	-	tigger transposable element derived 3	protein-coding
6505	chr17	44587035	44587830	+	15	NA	Intergenic	Intergenic	29948	NM_001466	2535		NM_001466	ENSG00000180340	FZD2	Fz2|OMOD2|fz-2|fzE2|hFz2	frizzled class receptor 2	protein-coding
8909	chr16	58000768	58001739	+	15	NA	promoter-TSS (NM_001195302)	promoter-TSS (NM_001195302)	-154	NM_001204911	79650		NM_024598	ENSG00000103005	USB1	C16orf57|HVSL1|Mpn1|PN|hMpn1|hUsb1	U6 snRNA biogenesis phosphodiesterase 1	protein-coding
5251	chr15	92634674	92635455	+	15	NA	intron (NM_207446, intron 1 of 2)	MLT2B4|LTR|ERVL	20711	NM_207446	400451		NM_207446	ENSG00000185442	FAM174B	-	family with sequence similarity 174 member B	protein-coding
7668-2	chr9	137070587	137071470	+	15	NA	promoter-TSS (NM_178448)	promoter-TSS (NM_178448)	-471	NM_178448	89958		NM_178448	ENSG00000186193	SAPCD2	C9orf140|p42.3	suppressor APC domain containing 2	protein-coding
5538	chr4	3243997	3244044	+	15	NA	promoter-TSS (NM_001330620)	promoter-TSS (NM_001330620)	-349	NM_001330620	345222		NM_001012982	ENSG00000188981	MSANTD1	C4orf44	Myb/SANT DNA binding domain containing 1	protein-coding
5623	chr3	134030900	134031761	+	15	NA	Intergenic	MIRb|SINE|MIR	-1405	NM_005630	6578		NM_005630	ENSG00000174640	SLCO2A1	MATR1|OATP2A1|PGT|PHOAD|PHOAR2|SLC21A2	solute carrier organic anion transporter family member 2A1	protein-coding
5237	chr15	74541222	74541999	+	15	NA	intron (NM_006465, intron 1 of 8)	CpG	390	NM_006465	10620		NM_006465	ENSG00000179361	ARID3B	BDP|DRIL2	AT-rich interaction domain 3B	protein-coding
8302	chrX	81120654	81122123	+	15	NA	intron (NM_030763, intron 2 of 6)	intron (NM_030763, intron 2 of 6)	80525	NM_030763	79366		NM_030763	ENSG00000198157	HMGN5	NBP-45|NSBP1	high mobility group nucleosome binding domain 5	protein-coding
8982-2	chr18	52366840	52368438	+	15	NA	intron (NM_005215, intron 1 of 28)	intron (NM_005215, intron 1 of 28)	27442	NM_005215	1630		NM_005215	ENSG00000187323	DCC	CRC18|CRCR1|HGPPS2|IGDCC1|MRMV1|NTN1R1	DCC netrin 1 receptor	protein-coding
5240	chrX	54920813	54922018	+	15	NA	intron (NM_001271184, intron 1 of 11)	intron (NM_001271184, intron 1 of 11)	591	NM_001271184	7216		NM_016157	ENSG00000067445	TRO	MAGE-d3|MAGED3	trophinin	protein-coding
10839	chr6	100452781	100454683	+	15	NA	intron (NM_005068, intron 3 of 11)	intron (NM_005068, intron 3 of 11)	10724	NM_001374769	6492		NM_005068	ENSG00000112246	SIM1	bHLHe14	SIM bHLH transcription factor 1	protein-coding
5772	chr5	141475795	141476497	+	15	NA	exon (NM_032403, exon 1 of 4)	exon (NM_032403, exon 1 of 4)	180	NM_032403	5098		NM_002588	ENSG00000240184	PCDHGC3	PC43|PCDH-GAMMA-C3|PCDH2	protocadherin gamma subfamily C, 3	protein-coding
5286-2	chr7	47452632	47453480	+	15	NA	intron (NM_022748, intron 4 of 30)	intron (NM_022748, intron 4 of 30)	11747	NR_145813	109623468		NR_145813		SNORD151	-	small nucleolar RNA, C/D box 151	snoRNA
8727	chr17	74875352	74876537	+	15	NA	Intergenic	LTR33|LTR|ERVL	-2950	NR_047576	2232		NM_004110	ENSG00000161513	FDXR	ADR|ADXR|ANOA	ferredoxin reductase	protein-coding
7879	chr7	79453541	79454695	+	15	NA	promoter-TSS (NM_001301128)	promoter-TSS (NM_001301128)	158	NR_038343	100505881		NR_038343	ENSG00000234456	MAGI2-AS3	-	MAGI2 antisense RNA 3	ncRNA
5227	chr17	76013914	76014707	+	15	NA	intron (NM_001320747, intron 18 of 21)	intron (NM_001320747, intron 18 of 21)	12996	NM_001320747	2125		NM_001988	ENSG00000167880	EVPL	EVPK	envoplakin	protein-coding
5513	chr16	2033642	2034757	+	15	NA	intron (NM_001252076, intron 1 of 5)	(TG)n|Simple_repeat|Simple_repeat	905	NM_001252076	9351		NM_004785	ENSG00000065054	NHERF2	E3KARP|NHE3RF2|NHERF-2|OCTS2|SIP-1|SIP1|SLC9A3R2|TKA-1	NHERF family PDZ scaffold protein 2	protein-coding
11556	chr7	75993955	75995257	+	15	NA	promoter-TSS (NM_031925)	promoter-TSS (NM_031925)	-11	NM_001317803	83862		NM_031925	ENSG00000189077	TMEM120A	NET29|TACAN|TMPIT	transmembrane protein 120A	protein-coding
6440	chr6_KI270798v1_alt	173940	175299	+	15	NA	Intergenic	Intergenic	116620	NR_039787	100616430		NR_039787	ENSG00000266245	MIR4644	-	microRNA 4644	ncRNA
7721	chr1	156114350	156115498	+	15	NA	exon (NM_001282626, exon 1 of 12)	exon (NM_001282626, exon 1 of 12)	213	NM_170707	4000		NM_005572	ENSG00000160789	LMNA	CDCD1|CDDC|CMD1A|CMT2B1|EMD2|FPL|FPLD|FPLD2|HGPS|IDC|LDP1|LFP|LGMD1B|LMN1|LMNC|LMNL1|MADA|PRO1	lamin A/C	protein-coding
7850	chr10	79026900	79026935	+	15	NA	intron (NR_015429, intron 3 of 7)	MIR1_Amn|SINE|MIR	40531	NR_015429	283050		NR_015429	ENSG00000224596	ZMIZ1-AS1	-	ZMIZ1 antisense RNA 1	ncRNA
9727	chr16	88772653	88774075	+	15	NA	intron (NM_001142864, intron 1 of 50)	intron (NM_001142864, intron 1 of 50)	11856	NM_001142864	9780		NM_001142864	ENSG00000103335	PIEZO1	DHS|ER|FAM38A|LMPH3|LMPHM6|Mib	piezo type mechanosensitive ion channel component 1 (Er blood group)	protein-coding
6082	chr2	108613373	108614309	+	15	NA	intron (NM_001193482, intron 1 of 9)	intron (NM_001193482, intron 1 of 9)	6694	NM_001193482	3987		NM_004987	ENSG00000169756	LIMS1	PINCH|PINCH-1|PINCH1	LIM zinc finger domain containing 1	protein-coding
6947	chr9	14909820	14910728	+	15	NA	non-coding (NR_163241, exon 1 of 8)	non-coding (NR_163241, exon 1 of 8)	154	NR_163241	158326		NM_144966	ENSG00000164946	FREM1	BNAR|C9orf143|C9orf145|C9orf154|MOTA|TILRR|TRIGNO2	FRAS1 related extracellular matrix 1	protein-coding
6262	chr22	50250328	50251303	+	15	NA	exon (NM_032019, exon 2 of 20)	exon (NM_032019, exon 2 of 20)	450	NM_001159286	83933		NM_032019	ENSG00000100429	HDAC10	HD10	histone deacetylase 10	protein-coding
5385	chr5	17415042	17415674	+	15	NA	intron (NR_134274, intron 1 of 1)	intron (NR_134274, intron 1 of 1)	11212	NR_134274	101929544		NR_134273	ENSG00000248455	LINC02217	-	long intergenic non-protein coding RNA 2217	ncRNA
8358	chr12	123712980	123714518	+	14	NA	intron (NM_012463, intron 1 of 19)	intron (NM_012463, intron 1 of 19)	1396	NM_012463	23545		NM_012463	ENSG00000185344	ATP6V0A2	A2|ARCL|ARCL2A|ATP6A2|ATP6N1D|J6B7|RTF|STV1|TJ6|TJ6M|TJ6S|VPH1|WSS|a2V	ATPase H+ transporting V0 subunit a2	protein-coding
7617	chr16	682682	683709	+	14	NA	TTS (NM_005861)	TTS (NM_005861)	1139	NR_136652	339123		NM_001005920	ENSG00000161999	JMJD8	C16orf20|PP14397	jumonji domain containing 8	protein-coding
6015	chr10	110459872	110460841	+	14	NA	Intergenic	Intergenic	-37551	NM_004419	1847		NM_004419	ENSG00000138166	DUSP5	DUSP|HVH3	dual specificity phosphatase 5	protein-coding
5222-2	chr17	57546619	57547277	+	14	NA	intron (NM_170721, intron 6 of 9)	L2a|LINE|L2	-23351	NR_110808	101927557		NR_110808	ENSG00000266100	LOC101927557	-	uncharacterized LOC101927557	ncRNA
5409	chr10	122159425	122160137	+	14	NA	intron (NM_206862, intron 7 of 22)	intron (NM_206862, intron 7 of 22)	-3849	NM_001291878	10579		NM_006997	ENSG00000138162	TACC2	AZU-1|ECTACC	transforming acidic coiled-coil containing protein 2	protein-coding
5611	chr11	128361104	128362162	+	14	NA	Intergenic	Intergenic	152867	NR_146647	105369564		NR_146647	ENSG00000272575	LINC02098	-	long intergenic non-protein coding RNA 2098	ncRNA
5562-2	chr5	38423289	38424592	+	14	NA	intron (NM_182798, intron 7 of 16)	intron (NM_182798, intron 7 of 16)	20399	NM_182798	133584		NM_152403	ENSG00000164318	EGFLAM	AGRINL|AGRNL|PIKA	EGF like, fibronectin type III and laminin G domains	protein-coding
7222	chr1	1605331	1606477	+	14	NA	intron (NR_147951, intron 2 of 2)	intron (NR_147951, intron 2 of 2)	-5769	NM_001242659	643988		NM_001242659	ENSG00000228594	FNDC10	C1orf233	fibronectin type III domain containing 10	protein-coding
8187	chr1	1062760	1064493	+	14	NA	intron (NR_148960, intron 3 of 3)	(GT)n|Simple_repeat|Simple_repeat	3892	NR_148960	100288175		NR_148960	ENSG00000291156	LOC100288175	-	uncharacterized LOC100288175	ncRNA
6559	chr8	130299763	130299777	+	14	NA	intron (NM_001362924, intron 3 of 30)	intron (NM_001362924, intron 3 of 30)	-3237	NR_002765	29065		NM_014152		ASAP1-IT1	ASAP1-IT|ASAP1IT|ASAP1IT1|DDEF1IT1|HSPC054|NCRNA00050	ASAP1 intronic transcript 1	ncRNA
6773	chr15	101772790	101774197	+	14	NA	Intergenic	Intergenic	-27755	NR_168283	100128108		NM_001321551	ENSG00000290760	UBE2Q2P13	-	UBE2Q2 pseudogene 13	pseudo
5959	chr10	102120456	102121241	+	14	NA	promoter-TSS (NM_001113407)	promoter-TSS (NM_001113407)	-480	NM_001321612	8861		NM_003893	ENSG00000198728	LDB1	CLIM-2|CLIM2|LDB-1|NLI	LIM domain binding 1	protein-coding
7543	chr3	169657316	169659062	+	14	NA	intron (NM_004991, intron 1 of 16)	intron (NM_004991, intron 1 of 16)	5523	NM_001205194	2122		NM_004991	ENSG00000085276	MECOM	AML1-EVI-1|EVI1|KMT8E|MDS1|MDS1-EVI1|PRDM3|RUSAT2	MDS1 and EVI1 complex locus	protein-coding
8868	chr6	168391198	168392542	+	14	NA	Intergenic	Intergenic	-49314	NM_022138	64094		NM_022138	ENSG00000112562	SMOC2	DTDP1|MST117|MSTP117|MSTP140|SMAP2|bA270C4A.1|bA37D8.1|dJ421D16.1	SPARC related modular calcium binding 2	protein-coding
5471-2	chr4	104494763	104495638	+	14	NA	promoter-TSS (NR_132741)	promoter-TSS (NR_132741)	-306	NM_025212	80319		NM_025212	ENSG00000168772	CXXC4	IDAX	CXXC finger protein 4	protein-coding
9234	chr20	37990629	37992310	+	14	NA	intron (NM_014657, intron 8 of 8)	intron (NM_014657, intron 8 of 8)	41987	NM_001303457	9675		NM_014657	ENSG00000101407	TTI1	KIAA0406|NEDMIM|smg-10	TELO2 interacting protein 1	protein-coding
6562	chr15	78035500	78036340	+	14	NA	intron (NM_144572, intron 3 of 12)	intron (NM_144572, intron 3 of 12)	-41695	NR_026998	91450		NR_026998		LOC91450	-	uncharacterized LOC91450	ncRNA
5296	chr20	16288375	16288912	+	14	NA	intron (NM_024704, intron 25 of 25)	intron (NM_024704, intron 25 of 25)	284805	NM_001199866	55614		NM_024704	ENSG00000089177	KIF16B	C20orf23|KISC20ORF|SNX23	kinesin family member 16B	protein-coding
5970	chr17_KI270857v1_alt	2778822	2779787	+	14	NA	intron (NM_001369614, intron 1 of 9).2	intron (NM_001369614, intron 1 of 9).2	2643	NM_001369615	7703		NM_007144	ENSG00000277258	PCGF2	MEL-18|RNF110|TPFS|ZNF144	polycomb group ring finger 2	protein-coding
6005	chr19	43934953	43935590	+	14	NA	promoter-TSS (NM_003425)	promoter-TSS (NM_003425)	11	NM_003425	7596		NM_003425	ENSG00000124459	ZNF45	KOX5|ZNF13	zinc finger protein 45	protein-coding
5366	chr19	9883003	9884261	+	14	NA	intron (NM_058164, intron 1 of 5)	intron (NM_058164, intron 1 of 5)	-25457	NM_001304348	93145		NM_058164	ENSG00000105088	OLFM2	NOE2|NOELIN2|NOELIN2_V1|OlfC	olfactomedin 2	protein-coding
6305	chr11	65833259	65834371	+	14	NA	promoter-TSS (NM_152760)	promoter-TSS (NM_152760)	-148	NM_152760	254122		NM_152760	ENSG00000172803	SNX32	SNX6B	sorting nexin 32	protein-coding
5208-2	chr9	214710	215795	+	14	NA	non-coding (NR_160804, exon 1 of 1)	non-coding (NR_160804, exon 1 of 1)	387	NM_203447	81704		NM_203447	ENSG00000107099	DOCK8	HEL-205|HIES2|MRD2|ZIR8	dedicator of cytokinesis 8	protein-coding
7601	chr1	44643560	44645105	+	14	NA	intron (NM_001319957, intron 7 of 13)	intron (NM_001319957, intron 7 of 13)	12364	NM_001376489	55182		NM_016501	ENSG00000187147	RNF220	C1orf164|HLD23	ring finger protein 220	protein-coding
6177	chr6_KI270797v1_alt	78597	79878	+	14	NA	Intergenic	Intergenic	-5210	NR_026781	401288		NM_207502	ENSG00000229214	LINC00242	C6orf122|NCRNA00242|dJ266L20.5	long intergenic non-protein coding RNA 242	ncRNA
5245	chr17	79796740	79797532	+	14	NA	promoter-TSS (NM_020649)	promoter-TSS (NM_020649)	-59	NM_020649	57332		NM_020649	ENSG00000141570	CBX8	PC3|RC1	chromobox 8	protein-coding
6589	chr17	76141083	76141870	+	14	NA	promoter-TSS (NM_001454)	promoter-TSS (NM_001454)	-231	NM_001454	2302		NM_001454	ENSG00000129654	FOXJ1	CILD43|FKHL13|HFH-4|HFH4	forkhead box J1	protein-coding
7330	chr3	37859868	37861405	+	14	NA	intron (NR_110532, intron 1 of 5)	CpG	1144	NR_110532	101928153		NR_110531	ENSG00000235257	ITGA9-AS1	-	ITGA9 antisense RNA 1	ncRNA
5957	chr9	69131142	69132803	+	14	NA	intron (NM_001369871, intron 1 of 24)	MER68|LTR|ERVL	8957	NM_001369871	9414		NM_004817	ENSG00000119139	TJP2	C9DUPq21.11|DFNA51|DUP9q21.11|FHCA1|PFIC4|X104|ZO2	tight junction protein 2	protein-coding
7084	chr6	43781482	43782752	+	14	NA	intron (NM_001033756, intron 6 of 6)	intron (NM_001033756, intron 6 of 6)	10149	NM_001287044	7422		NM_003376	ENSG00000112715	VEGFA	L-VEGF|MVCD1|VEGF|VPF	vascular endothelial growth factor A	protein-coding
6015-2	chr2	61660454	61661417	+	14	NA	Intergenic	MamSINE1|SINE|tRNA-RTE	-122579	NM_003400	7514		NM_003400	ENSG00000082898	XPO1	CRM-1|CRM1|emb|exp1	exportin 1	protein-coding
5825	chr7	25995779	25996750	+	14	NA	Intergenic	MER110-int|LTR|ERV1	-46278	NR_029597	406940		NR_029597	ENSG00000199085	MIR148A	MIRN148|MIRN148A|hsa-mir-148|mir-148a	microRNA 148a	ncRNA
11120	chr2	9767837	9769873	+	14	NA	Intergenic	Intergenic	-74587	NM_001318977	9014		NM_005680	ENSG00000115750	TAF1B	MGC:9349|RAF1B|RAFI63|SL1|TAFI63	TATA-box binding protein associated factor, RNA polymerase I subunit B	protein-coding
8884	chr22	41523727	41525248	+	14	NA	intron (NM_001098, intron 12 of 17)	intron (NM_001098, intron 12 of 17)	19983	NM_001018050	171568		NM_138338	ENSG00000100413	POLR3H	C25|RPC22.9|RPC8	RNA polymerase III subunit H	protein-coding
6526	chr6	34246493	34247875	+	14	NA	TTS (NM_001319081)	TTS (NM_001319081)	1822	NM_001008703	221491		NM_178508	ENSG00000186577	SMIM29	C6orf1|LBH	small integral membrane protein 29	protein-coding
6479-2	chr3	72338737	72339835	+	14	NA	Intergenic	Intergenic	107337	NM_012234	23429		NM_012234	ENSG00000163602	RYBP	AAP1|APAP-1|DEDAF|YEAF1	RING1 and YY1 binding protein	protein-coding
6760	chr11	60870349	60871587	+	14	NA	exon (NM_207341, exon 5 of 12)	exon (NM_207341, exon 5 of 12)	3426	NM_207341	22917		NM_207341	ENSG00000149506	ZP1	HEL163|OOMD|OOMD1|OZEMA1|ZPB1	zona pellucida glycoprotein 1	protein-coding
7065-2	chr3	12965092	12966642	+	14	NA	intron (NM_001134382, intron 1 of 13)	L2a|LINE|L2	1863	NM_014869	9922		NM_014869	ENSG00000144711	IQSEC1	ARF-GEP100|ARFGEP100|BRAG2|GEP100|IDDSSBA	IQ motif and Sec7 domain ArfGEF 1	protein-coding
7696	chr2	241880943	241882322	+	14	NA	intron (NR_110220, intron 1 of 3)	CpG	269	NR_110220	101927289		NR_110220	ENSG00000233806	LINC01237	-	long intergenic non-protein coding RNA 1237	ncRNA
5931	chr16	85541133	85542331	+	14	NA	Intergenic	Intergenic	-69677	NM_001134473	23199		NM_014615	ENSG00000131149	GSE1	CRHSP24|KIAA0182	Gse1 coiled-coil protein	protein-coding
6377	chr6	41655620	41656567	+	14	NA	Intergenic	Intergenic	17625	NM_005586	4188		NM_005586	ENSG00000112559	MDFI	I-MF|I-mfa	MyoD family inhibitor	protein-coding
6113	chr6	100174156	100175324	+	14	NA	Intergenic	Intergenic	-180502	NM_032503	84539		NM_032503	ENSG00000152034	MCHR2	GPR145|GPRv17|MCH-2R|MCH-R2|MCH2|MCH2R|MCHR-2|SLT	melanin concentrating hormone receptor 2	protein-coding
11330	chr4	1206860	1208900	+	14	NA	intron (NR_024569, intron 1 of 3)	intron (NR_024569, intron 1 of 3)	1082	NM_001199021	10417		NM_012445	ENSG00000159674	SPON2	DIL-1|DIL1|M-SPONDIN|MINDIN	spondin 2	protein-coding
7427	chr1	153629214	153631011	+	14	NA	intron (NM_006271, intron 1 of 2)	intron (NM_006271, intron 1 of 2)	1678	NM_006271	6271		NM_006271	ENSG00000160678	S100A1	S100|S100-alpha|S100A	S100 calcium binding protein A1	protein-coding
10807	chr19	18381700	18383332	+	14	NA	Intergenic	Intergenic	-3642	NM_004864	9518		NM_004864	ENSG00000130513	GDF15	GDF-15|HG|MIC-1|MIC1|NAG-1|PDF|PLAB|PTGFB	growth differentiation factor 15	protein-coding
7187	chr3	5425643	5426835	+	14	NA	Intergenic	Intergenic	-175984	NR_039953	100616334		NR_039953	ENSG00000265180	MIR4790	-	microRNA 4790	ncRNA
7074	chr10	78968999	78970109	+	14	NA	intron (NR_015429, intron 3 of 7)	MER117|DNA|hAT-Charlie	97894	NR_015429	283050		NR_015429	ENSG00000224596	ZMIZ1-AS1	-	ZMIZ1 antisense RNA 1	ncRNA
7272	chr2	207747806	207748809	+	14	NA	intron (NM_001330218, intron 8 of 9)	intron (NM_001330218, intron 8 of 9)	-6500	NR_039934	100616361		NR_039934	ENSG00000284079	MIR4775	-	microRNA 4775	ncRNA
8075	chr2	121868738	121870190	+	14	NA	Intergenic	Intergenic	113813	NM_004622	7247		NM_004622	ENSG00000211460	TSN	BCLF-1|C3PO|RCHF1|REHF-1|TBRBP|TRSLN	translin	protein-coding
7436	chr7	139711916	139713073	+	14	NA	intron (NM_022740, intron 2 of 14)	intron (NM_022740, intron 2 of 14)	65504	NM_022740	28996		NM_022740	ENSG00000064393	HIPK2	PRO0593	homeodomain interacting protein kinase 2	protein-coding
6027	chr10	80410914	80411709	+	14	NA	intron (NM_001243781, intron 1 of 5)	intron (NM_001243781, intron 1 of 5)	-2508	NM_001243778	84293		NM_032333	ENSG00000122378	PRXL2A	Adrx|C10orf58|FAM213A|PAMM	peroxiredoxin like 2A	protein-coding
5312	chr22	31969817	31970814	+	14	NA	promoter-TSS (NR_149128)	promoter-TSS (NR_149128)	-508	NR_149128	105372999		NR_149128		LINC02558	-	long intergenic non-protein coding RNA 2558	ncRNA
16615	chr3	126989795	126992702	+	14	NA	intron (NM_032242, intron 1 of 30)	intron (NM_032242, intron 1 of 30)	2654	NM_032242	5361		NM_032242	ENSG00000114554	PLXNA1	DWOPNED|NOV|NOVP|PLEXIN-A1|PLXN1	plexin A1	protein-coding
5796	chr16	87854718	87855836	+	14	NA	intron (NM_003486, intron 1 of 9)	intron (NM_003486, intron 1 of 9)	1381	NR_162122	113218509		NR_162122		MIR11401	-	microRNA 11401	ncRNA
6285	chr5	134608734	134609862	+	14	NA	intron (NM_001033503, intron 6 of 7)	intron (NM_001033503, intron 6 of 7)	23530	NM_001033503	51128		NM_016103	ENSG00000152700	SAR1B	ANDD|CMRD|GTBPB|SARA2	secretion associated Ras related GTPase 1B	protein-coding
6083	chr8	38769567	38770566	+	14	NA	intron (NM_001352804, intron 1 of 10)	(GT)n|Simple_repeat|Simple_repeat	12791	NM_001352784	6867		NM_006283	ENSG00000147526	TACC1	Ga55	transforming acidic coiled-coil containing protein 1	protein-coding
6767-2	chr13	97259761	97261562	+	14	NA	intron (NM_001382682, intron 1 of 7)	intron (NM_001382682, intron 1 of 7)	38328	NM_001382697	10150		NM_005757	ENSG00000139793	MBNL2	MBLL|MBLL39|PRO2032	muscleblind like splicing regulator 2	protein-coding
7013	chr9	130693199	130694230	+	14	NA	promoter-TSS (NM_001282708)	promoter-TSS (NM_001282708)	-46	NM_001282709	23404		NM_014285	ENSG00000130713	EXOSC2	RRP4|Rrp4p|SHRF|hRrp4p|p7	exosome component 2	protein-coding
6538-2	chr9	126915350	126916438	+	14	NA	intron (NM_001366400, intron 1 of 18)	intron (NM_001366400, intron 1 of 18)	455	NM_001366400	9649		NM_014636	ENSG00000136828	RALGPS1	RALGEF2|RALGPS1A	Ral GEF with PH domain and SH3 binding motif 1	protein-coding
14781	chr2	111120319	111122543	+	14	NA	intron (NM_207003, intron 1 of 4)	CpG-16420	517	NM_138627	10018		NM_006538	ENSG00000153094	BCL2L11	BAM|BIM|BOD	BCL2 like 11	protein-coding
6236	chr10	119302671	119303537	+	14	NA	intron (NM_005308, intron 1 of 15)	intron (NM_005308, intron 1 of 15)	-74868	NR_039829	100616398		NR_039829	ENSG00000265719	MIR4681	-	microRNA 4681	ncRNA
6506	chr5	160293865	160294813	+	14	NA	intron (NR_131769, intron 2 of 7)	intron (NR_131769, intron 2 of 7)	18225	NM_024565	79616		NM_024565	ENSG00000135083	CCNJL	-	cyclin J like	protein-coding
5394	chr7	5594736	5596025	+	14	NA	intron (NM_003088, intron 1 of 4)	MIR3|SINE|MIR	2564	NM_003088	6624		NM_003088	ENSG00000075618	FSCN1	FAN1|HSN|SNL|p55	fascin actin-bundling protein 1	protein-coding
15123	chr19	380926	383187	+	14	NA	Intergenic	Intergenic	-6030	NM_016585	51298		NM_016585	ENSG00000105549	SPMAP2	CT56|THEG|THEG1	sperm microtubule associated protein 2	protein-coding
8537	chr8	133296308	133298070	+	14	NA	promoter-TSS (NM_001135242)	promoter-TSS (NM_001135242)	-49	NM_001374845	10397		NM_006096	ENSG00000104419	NDRG1	CAP43|CMT4D|DRG-1|DRG1|GC4|HMSNL|NDR1|NMSL|PROXY1|RIT42|RTP|TARG1|TDD5	N-myc downstream regulated 1	protein-coding
8419	chr14	91387692	91389230	+	14	NA	intron (NM_001080414, intron 3 of 29)	intron (NM_001080414, intron 3 of 29)	29359	NM_001080414	440193		NM_001080414	ENSG00000015133	CCDC88C	DAPLE|HKRP2|HYC1|KIAA1509|SCA40	coiled-coil domain containing 88C	protein-coding
8443	chr16	857793	859273	+	14	NA	intron (NR_147885, intron 10 of 11)	CpG	53090	NM_001013638	388199		NM_001013638		PRR25	gs64	proline rich 25	unknown
5583-2	chr5	102754466	102755212	+	14	NA	promoter-TSS (NM_001364587)	promoter-TSS (NM_001364587)	56	NM_001319943	5066		NM_000919	ENSG00000145730	PAM	PAL|PAM-1|PHM	peptidylglycine alpha-amidating monooxygenase	protein-coding
6874	chr10	102478852	102479691	+	14	NA	TTS (NM_005736)	TTS (NM_005736)	17876	NM_024789	79847		NM_024789	ENSG00000138111	MFSD13A	C10orf77|TMEM180|bA18I14.8	major facilitator superfamily domain containing 13A	protein-coding
6065	chr2	101734574	101735768	+	14	NA	intron (NM_001384572, intron 1 of 29)	intron (NM_001384572, intron 1 of 29)	36906	NM_001384567	9448		NM_004834	ENSG00000071054	MAP4K4	FLH21957|HEL-S-31|HGK|MEKKK4|NIK	mitogen-activated protein kinase kinase kinase kinase 4	protein-coding
5913	chr3	9986830	9987671	+	14	NA	non-coding (NR_103821, exon 1 of 3)	non-coding (NR_103821, exon 1 of 3)	357	NR_103821	442075		NM_001013730		EMC3-AS1	-	EMC3 antisense RNA 1	ncRNA
5708-2	chr17	82241626	82242752	+	14	NA	TTS (NM_001893)	TTS (NM_001893)	5521	NR_106845	102465472		NR_106845	ENSG00000284574	MIR6787	hsa-mir-6787	microRNA 6787	ncRNA
5980	chr1	109497554	109498734	+	14	NA	3' UTR (NM_001134400, exon 3 of 3)	3' UTR (NM_001134400, exon 3 of 3)	4050	NM_182580	284613		NM_182580	ENSG00000174151	CYB561D1	-	cytochrome b561 family member D1	protein-coding
5892	chr6	35797524	35798390	+	14	NA	promoter-TSS (NM_001252598)	promoter-TSS (NM_001252598)	-613	NM_001252598	1208		NM_001832	ENSG00000137392	CLPS	-	colipase	protein-coding
5702	chr1	21276479	21277521	+	14	NA	intron (NM_001397, intron 3 of 18)	AluSx|SINE|Alu	2615	NM_001113347	1889		NM_001397	ENSG00000117298	ECE1	ECE	endothelin converting enzyme 1	protein-coding
8736	chr1	162010822	162011987	+	14	NA	intron (NM_015441, intron 3 of 7)	intron (NM_015441, intron 3 of 7)	13061	NM_015441	25903		NM_015441	ENSG00000162745	OLFML2B	-	olfactomedin like 2B	protein-coding
5378	chr6	42741941	42742795	+	14	NA	Intergenic	Intergenic	3735	NM_003192	6903		NM_003192	ENSG00000124659	TBCC	CFC	tubulin folding cofactor C	protein-coding
6006	chr11	119991131	119992245	+	14	NA	Intergenic	Intergenic	137165	NM_001330382	23650		NM_012101	ENSG00000137699	TRIM29	ATDC	tripartite motif containing 29	protein-coding
6546	chr3	72595437	72596907	+	14	NA	Intergenic	L2c|LINE|L2	68077	NR_135531	105377162		NR_135531		LOC105377162	-	uncharacterized LOC105377162	ncRNA
6167	chr16	75265902	75266947	+	14	NA	promoter-TSS (NM_001170720).2	promoter-TSS (NM_001170720).2	-417	NM_001170718	9564		NM_014567	ENSG00000050820	BCAR1	CAS|CAS1|CASS1|CRKAS|P130Cas	BCAR1 scaffold protein, Cas family member	protein-coding
6909	chr2	175004823	175005758	+	14	NA	promoter-TSS (NM_001025201)	promoter-TSS (NM_001025201)	91	NM_001025201	1123		NM_001822	ENSG00000128656	CHN1	ARHGAP2|CHN|DURS2|NC|RHOGAP2	chimerin 1	protein-coding
7453	chr22	20130201	20131589	+	14	NA	promoter-TSS (NM_013373)	promoter-TSS (NM_013373)	-909	NM_001185024	29801		NM_013373	ENSG00000099904	ZDHHC8	DHHC8|ZDHHCL1|ZNF378	zinc finger DHHC-type palmitoyltransferase 8	protein-coding
5927	chr5	142770714	142770721	+	14	NA	promoter-TSS (NM_001349547)	promoter-TSS (NM_001349547)	340	NM_001135608	23092		NM_015071	ENSG00000145819	ARHGAP26	GRAF|GRAF1|OPHN1L|OPHN1L1	Rho GTPase activating protein 26	protein-coding
6570	chr19	39532211	39533231	+	14	NA	exon (NM_152361, exon 1 of 1)	exon (NM_152361, exon 1 of 1)	131	NM_152361	126272		NM_152361	ENSG00000176401	EID2B	EID-2B|EID-3	EP300 interacting inhibitor of differentiation 2B	protein-coding
5265-2	chr5	1333038	1333921	+	14	NA	intron (NM_030782, intron 7 of 16)	intron (NM_030782, intron 7 of 16)	11620	NM_030782	81037		NM_030782	ENSG00000049656	CLPTM1L	CRR9	CLPTM1 like	protein-coding
6170-2	chrX	76427677	76428613	+	14	NA	exon (NM_020932, exon 1 of 1)	exon (NM_020932, exon 1 of 1)	435	NM_020932	57692		NM_020932	ENSG00000198934	MAGEE1	DAMAGE|HCA1	MAGE family member E1	protein-coding
8740	chr9	130186480	130188170	+	14	NA	intron (NM_014286, intron 1 of 7)	intron (NM_014286, intron 1 of 7)	-13075	NM_001128826	23413		NM_014286	ENSG00000107130	NCS1	FLUP|FREQ	neuronal calcium sensor 1	protein-coding
8660	chr2	240565250	240566555	+	14	NA	TTS (NM_001370465)	TTS (NM_001370465)	-2582	NM_018226	57140		NM_018226	ENSG00000142327	RNPEPL1	-	arginyl aminopeptidase like 1	protein-coding
8087	chr9	133874464	133875836	+	14	NA	intron (NM_001134398, intron 2 of 29)	intron (NM_001134398, intron 2 of 29)	117174	NM_001134398	7410		NM_003371	ENSG00000160293	VAV2	VAV-2	vav guanine nucleotide exchange factor 2	protein-coding
7784	chr9_KI270823v1_alt	79239	80609	+	14	NA	promoter-TSS (NM_207299).2	promoter-TSS (NM_207299).2	-6	NM_207299	54886		NM_017753	ENSG00000148123	PLPPR1	LPPR1|PRG-3|PRG3	phospholipid phosphatase related 1	protein-coding
6292-2	chr16	4183186	4184303	+	14	NA	Intergenic	CpG	58336	NM_001323668	6345		NM_001098814	ENSG00000185739	SRL	SAR	sarcalumenin	protein-coding
5517	chr6	77778266	77779380	+	14	NA	intron (NM_001322247, intron 3 of 4)	L2|LINE|L2	125784	NM_001322247	101928601		NM_001282136	ENSG00000269964	MEI4	-	meiotic double-stranded break formation protein 4	protein-coding
5476	chr11	27215819	27216829	+	14	NA	intron (NR_125767, intron 2 of 4)	MIRb|SINE|MIR	2444	NR_125768	103695435		NR_125766	ENSG00000254560	BBOX1-AS1	-	BBOX1 antisense RNA 1	ncRNA
5290	chr17	50946348	50947223	+	14	NA	Intergenic	Intergenic	-78807	NM_001243877	10140		NM_005749	ENSG00000141232	TOB1	APRO5|APRO6|PIG49|TOB|TROB|TROB1	transducer of ERBB2, 1	protein-coding
6848	chr17	57518597	57519708	+	14	NA	intron (NM_170721, intron 5 of 9)	intron (NM_170721, intron 5 of 9)	4445	NR_110808	101927557		NR_110808	ENSG00000266100	LOC101927557	-	uncharacterized LOC101927557	ncRNA
5496	chr14	103848107	103848863	+	14	NA	promoter-TSS (NM_015316)	promoter-TSS (NM_015316)	764	NR_038436	145216		NR_038436	ENSG00000258735	PPP1R13B-DT	HITT|LINC00637	PPP1R13B divergent transcript	ncRNA
6361	chr1_GL383518v1_alt	44094	45432	+	14	NA	promoter-TSS (NM_023015)	promoter-TSS (NM_023015)	12	NM_001324475	65123		NM_023015	ENSG00000143624	INTS3	C1orf193|C1orf60|INT3|SOSS-A|SOSSA	integrator complex subunit 3	protein-coding
15425	chr15	75762975	75765795	+	14	NA	Intergenic	Intergenic	-2070	NR_036198	100423035		NR_036198	ENSG00000284385	MIR4313	-	microRNA 4313	ncRNA
6767	chr1	155745349	155746503	+	14	NA	intron (NR_024117, intron 1 of 12).2	CpG	158	NR_024117	100129405		NR_024117		MSTO2P	MSTO2	misato family member 2, pseudogene	pseudo
8917	chr10	44972861	44974619	+	14	NA	intron (NM_032023, intron 3 of 10)	intron (NM_032023, intron 3 of 10)	5069	NM_007021	11067		NM_007021	ENSG00000165507	DEPP1	C10orf10|DEPP|FIG|Fseg	DEPP autophagy regulator 1	protein-coding
8820	chr19	38712982	38715007	+	14	NA	intron (NM_001322033, intron 8 of 20)	intron (NM_001322033, intron 8 of 20)	30480	NM_144691	147968		NM_144691	ENSG00000182472	CAPN12	-	calpain 12	protein-coding
6961-2	chr17	64099490	64100775	+	14	NA	intron (NM_001433, intron 1 of 21)	intron (NM_001433, intron 1 of 21)	30012	NM_001433	2081		NM_001433	ENSG00000178607	ERN1	IRE1|IRE1P|IRE1a|hIRE1p	endoplasmic reticulum to nucleus signaling 1	protein-coding
10161	chr1	16216024	16217878	+	14	NA	Intergenic	Intergenic	-4299	NM_153213	128272		NM_153213	ENSG00000142632	ARHGEF19	WGEF	Rho guanine nucleotide exchange factor 19	protein-coding
5980-2	chr5	122845561	122846455	+	14	NA	intron (NR_146145, intron 1 of 7)	intron (NR_146145, intron 1 of 7)	395	NM_014035	28966		NM_014035	ENSG00000064652	SNX24	PRO1284|SBBI31	sorting nexin 24	protein-coding
5483	chr9	136695700	136696614	+	14	NA	Intergenic	CpG	-8700	NM_001012727	10555		NM_006412	ENSG00000169692	AGPAT2	1-AGPAT2|BSCL|BSCL1|LPAAB|LPAAT-beta|LPLAT2	1-acylglycerol-3-phosphate O-acyltransferase 2	protein-coding
5672	chr3	37945585	37946520	+	14	NA	intron (NM_005808, intron 1 of 6)	intron (NM_005808, intron 1 of 6)	-23352	NR_029499	407015		NR_029499	ENSG00000199075	MIR26A1	MIR26A|MIRN26A1|mir-26a-1	microRNA 26a-1	ncRNA
7304	chr3	50323611	50325119	+	14	NA	TTS (NM_007275)	TTS (NM_007275)	-1515	NM_033158	8692		NM_003773	ENSG00000068001	HYAL2	LUCA2	hyaluronidase 2	protein-coding
5818	chr20	33663135	33664449	+	14	NA	exon (NM_080825, exon 2 of 2)	exon (NM_080825, exon 2 of 2)	1465	NM_080825	128864		NM_080825	ENSG00000149609	C20orf144	dJ63M2.6	chromosome 20 open reading frame 144	protein-coding
5283-3	chr7	2355210	2355912	+	14	NA	intron (NM_001362791, intron 1 of 18)	intron (NM_001362791, intron 1 of 18)	734	NM_001037283	8662		NM_003751	ENSG00000106263	EIF3B	EIF3-ETA|EIF3-P110|EIF3-P116|EIF3S9|PRT1	eukaryotic translation initiation factor 3 subunit B	protein-coding
5358-2	chr2	54708615	54709554	+	14	NA	Intergenic	MER52D|LTR|ERV1	-15928	NM_001039753	400954		NM_001039753	ENSG00000214595	EML6	-	EMAP like 6	protein-coding
6868	chr22_GL383582v2_alt	12423	13475	+	14	NA	promoter-TSS (NR_034118).3	promoter-TSS (NR_034118).3	168	NM_002490	4700		NM_002490	ENSG00000184983	NDUFA6	B14|CI-B14|LYRM6|MC1DN33|NADHB14	NADH:ubiquinone oxidoreductase subunit A6	protein-coding
5985	chr16	85460212	85461396	+	14	NA	Intergenic	L3|LINE|CR1	-150605	NM_001134473	23199		NM_014615	ENSG00000131149	GSE1	CRHSP24|KIAA0182	Gse1 coiled-coil protein	protein-coding
5476-2	chr11_KI270830v1_alt	152739	153744	+	13	NA	Intergenic	Intergenic	5405	NR_026643	387742		NM_001014374	ENSG00000205866	FAM99A	-	family with sequence similarity 99 member A	ncRNA
7059	chr22	18349125	18350552	+	13	NA	Intergenic	Intergenic	36718	NR_165634	729461		NM_201401	ENSG00000274044	FAM230J	LINC01660	family with sequence similarity 230 member J	ncRNA
5357-2	chr9	131668649	131669886	+	13	NA	intron (NM_001377935, intron 1 of 26)	intron (NM_001377935, intron 1 of 26)	-17864	NM_001377936	2889		NM_005312	ENSG00000107263	RAPGEF1	C3G|GRF2	Rap guanine nucleotide exchange factor 1	protein-coding
7475	chr6	167397139	167399010	+	13	NA	Intergenic	Intergenic	-13564	NR_163195	6953		NM_004610	ENSG00000290751	TCP10L3	TCP10|TCP10A	t-complex 10 like 3 (pseudogene)	pseudo
7728	chr6	24494473	24495691	+	13	NA	exon (NM_001368954, exon 1 of 9)	exon (NM_001368954, exon 1 of 9)	113	NM_001080	7915		NM_001080	ENSG00000112294	ALDH5A1	SSADH|SSDH	aldehyde dehydrogenase 5 family member A1	protein-coding
5644-3	chr8	19013760	19014892	+	13	NA	promoter-TSS (NM_015310)	promoter-TSS (NM_015310)	-623	NM_015310	23362		NM_015310	ENSG00000156011	PSD3	EFA6D|EFA6R|HCA67	pleckstrin and Sec7 domain containing 3	protein-coding
5675	chr1	226082917	226083997	+	13	NA	promoter-TSS (NR_146920)	promoter-TSS (NR_146920)	-118	NR_146920	105373113		NR_146920		LINC01703	lncPARP1	long intergenic non-protein coding RNA 1703	ncRNA
5390	chr12	64720896	64721689	+	13	NA	intron (NM_002076, intron 12 of 13)	intron (NM_002076, intron 12 of 13)	38114	NM_002076	2799		NM_002076	ENSG00000135677	GNS	G6S	glucosamine (N-acetyl)-6-sulfatase	protein-coding
6394	chr20	47785930	47787019	+	13	NA	promoter-TSS (NM_018837)	promoter-TSS (NM_018837)	142	NM_001161841	55959		NM_018837	ENSG00000196562	SULF2	HSULF-2	sulfatase 2	protein-coding
5681	chr22	17772614	17773907	+	13	NA	intron (NM_001244567, intron 1 of 5)	intron (NM_001244567, intron 1 of 5)	782	NM_197966	637		NM_001196	ENSG00000015475	BID	FP497	BH3 interacting domain death agonist	protein-coding
6457	chr20	25356128	25357164	+	13	NA	intron (NM_001042472, intron 1 of 12)	intron (NM_001042472, intron 1 of 12)	34189	NM_001042472	26090		NM_015600	ENSG00000100997	ABHD12	ABHD12A|BEM46L2|C20orf22|PHARC|dJ965G21.2|hABHD12	abhydrolase domain containing 12, lysophospholipase	protein-coding
5362	chr2	43152219	43153539	+	13	NA	Intergenic	Intergenic	-50434	NR_151714	100506047		NR_151714		LINC02580	-	long intergenic non-protein coding RNA 2580	ncRNA
6332	chr6	43950703	43951874	+	13	NA	Intergenic	Intergenic	-49297	NR_160955	221416		NM_153246	ENSG00000181577	LINC03040	C6orf223	long intergenic non-protein coding RNA 3040	ncRNA
5597	chr15	84229464	84230579	+	13	NA	non-coding (NR_027001, exon 1 of 7)	non-coding (NR_027001, exon 1 of 7)	115	NR_158192	102724135		NR_158192		LOC102724135	-	uncharacterized LOC102724135	pseudo
7484	chr15	69537738	69538819	+	13	NA	Intergenic	MER115|DNA|hAT-Tip100	-23442	NR_026979	145837		NR_026979	ENSG00000245750	DRAIC	-	downregulated RNA in cancer, inhibitor of cell invasion and migration	ncRNA
6237	chr15	75758244	75759137	+	13	NA	Intergenic	Intergenic	3625	NR_036198	100423035		NR_036198	ENSG00000284385	MIR4313	-	microRNA 4313	ncRNA
6058	chr5	14560170	14561086	+	13	NA	Intergenic	Intergenic	-21164	NM_019018	54491		NM_019018	ENSG00000145569	OTULINL	FAM105A|NET20	OTU deubiquitinase with linear linkage specificity like	protein-coding
7800	chr3	37544623	37545962	+	13	NA	intron (NM_002207, intron 15 of 27)	intron (NM_002207, intron 15 of 27)	93151	NM_002207	3680		NM_002207	ENSG00000144668	ITGA9	ALPHA-RLC|ITGA4L|RLC	integrin subunit alpha 9	protein-coding
6590	chr16	31201525	31202517	+	13	NA	intron (NR_102400, intron 1 of 1)	intron (NR_102400, intron 1 of 1)	136	NR_102400	100652740		NR_102400	ENSG00000261359	PYCARD-AS1	C16orf98|PYCARDOS	PYCARD antisense RNA 1	ncRNA
5530	chr11	19803362	19804325	+	13	NA	intron (NM_145117, intron 1 of 37)	intron (NM_145117, intron 1 of 37)	-43760	NR_039843	100616426		NR_039843	ENSG00000264309	MIR4694	-	microRNA 4694	ncRNA
6185	chr15	75029080	75029775	+	13	NA	intron (NM_001301103, intron 2 of 3)	intron (NM_001301103, intron 2 of 3)	5837	NM_001301102	60490		NM_021823	ENSG00000138621	PPCDC	MDS018|PPC-DC|coaC	phosphopantothenoylcysteine decarboxylase	protein-coding
5822	chr1	26541451	26542371	+	13	NA	intron (NM_002953, intron 2 of 21)	intron (NM_002953, intron 2 of 21)	-1201	NM_001330441	6195		NM_002953	ENSG00000117676	RPS6KA1	HU-1|MAPKAPK1|MAPKAPK1A|RSK|RSK1|p90Rsk	ribosomal protein S6 kinase A1	protein-coding
5826	chr11	69011169	69011829	+	13	NA	promoter-TSS (NR_120541)	promoter-TSS (NR_120541)	-855	NR_120541	101928200		NR_120541	ENSG00000256508	MRGPRF-AS1	-	MRGPRF antisense RNA 1	ncRNA
5625	chr20	45945238	45946412	+	13	NA	exon (NM_022104, exon 12 of 17)	exon (NM_022104, exon 12 of 17)	11142	NM_022104	63935		NM_022104	ENSG00000100982	PCIF1	C20orf67|CAPAM|MT-A70|PPP1R121|hCAPAM|hPCIF1	phosphorylated CTD interacting factor 1	protein-coding
7747	chr17	74769798	74771246	+	13	NA	TTS (NR_130954)	TTS (NR_130954)	5823	NM_001305078	26151		NM_015654	ENSG00000109065	NAT9	EBSP, hNATL	N-acetyltransferase 9 (putative)	protein-coding
5783	chr6	107674914	107675767	+	13	NA	Intergenic	Intergenic	56810	NM_001286409	256380		NM_198081	ENSG00000146285	SCML4	dJ47M23.1	Scm polycomb group protein like 4	protein-coding
5539	chr15	90351742	90352803	+	13	NA	promoter-TSS (NM_001004309)	promoter-TSS (NM_001004309)	-12	NM_001004309	342132		NM_001004309	ENSG00000196391	ZNF774	-	zinc finger protein 774	protein-coding
5902	chr19	5046081	5046845	+	13	NA	intron (NM_001370093, intron 5 of 11)	intron (NM_001370093, intron 5 of 11)	77350	NM_015015	23030		NM_015015	ENSG00000127663	KDM4B	JMJD2B|MRD65|TDRD14B	lysine demethylase 4B	protein-coding
5364	chr13	93473228	93474048	+	13	NA	intron (NM_005708, intron 1 of 8)	MER52A|LTR|ERV1	246831	NM_005708	10082		NM_005708	ENSG00000183098	GPC6	OMIMD1	glypican 6	protein-coding
5219	chr1	97137767	97138565	+	13	NA	intron (NM_000110, intron 20 of 22)	intron (NM_000110, intron 20 of 22)	42243	NR_046590	100873932		NR_046590	ENSG00000232878	DPYD-AS1	-	DPYD antisense RNA 1	ncRNA
7500	chr18	69885237	69886680	+	13	NA	intron (NM_006566, intron 4 of 6)	intron (NM_006566, intron 4 of 6)	61915	NM_001303618	10666		NM_006566	ENSG00000150637	CD226	DNAM-1|DNAM1|PTA1|TLiSA1	CD226 molecule	protein-coding
5968	chr11	115939175	115940154	+	13	NA	Intergenic	Intergenic	-179464	NR_034148	283143		NR_034148		LINC00900	-	long intergenic non-protein coding RNA 900	ncRNA
6196-2	chr15	58441814	58442456	+	13	NA	intron (NR_120338, intron 2 of 2)	intron (NR_120338, intron 2 of 2)	10144	NM_000236	3990		NM_000236	ENSG00000166035	LIPC	HDLCQ12|HL|HTGL|LIPH	lipase C, hepatic type	protein-coding
6989	chr17	11610956	11611963	+	13	NA	intron (NM_001372, intron 3 of 68)	intron (NM_001372, intron 3 of 68)	12989	NM_001372	1770		NM_001372	ENSG00000007174	DNAH9	CILD40|DNAH17L|DNEL1|DYH9|Dnahc9|HL-20|HL20	dynein axonemal heavy chain 9	protein-coding
6308	chr13	112715626	112716808	+	13	NA	intron (NM_032189, intron 1 of 28)	intron (NM_032189, intron 1 of 28)	25888	NM_015205	23250		NM_015205	ENSG00000068650	ATP11A	ATPIH|ATPIS|AUNA2|DFNA84|HLD24	ATPase phospholipid transporting 11A	protein-coding
7506	chr1	21905885	21905891	+	13	NA	intron (NM_001291860, intron 1 of 96)	AluJr|SINE|Alu	31422	NM_005529	3339		NM_005529	ENSG00000142798	HSPG2	HSPG|PLC|PRCAN|SJA|SJS|SJS1	heparan sulfate proteoglycan 2	protein-coding
8998	chr22	22651262	22652556	+	13	NA	Intergenic	(TCTG)n|Simple_repeat|Simple_repeat	5597	NM_199127	91227		NM_080839	ENSG00000100121	GGTLC2	GGTL4	gamma-glutamyltransferase light chain 2	protein-coding
5736	chr14	71163424	71164308	+	13	NA	Intergenic	Intergenic	-156610	NM_001354289	26037		NM_015556	ENSG00000197555	SIPA1L1	E6TP1|SPAR1	signal induced proliferation associated 1 like 1	protein-coding
7022	chr14	104776123	104776200	+	13	NA	intron (NM_001382433, intron 6 of 15)	AluSz|SINE|Alu	17440	NM_005163	207		NM_005163	ENSG00000142208	AKT1	AKT|PKB|PKB-ALPHA|PRKBA|RAC|RAC-ALPHA	AKT serine/threonine kinase 1	protein-coding
5618	chr17	8275563	8276297	+	13	NA	Intergenic	Intergenic	-12740	NM_001177802	29098		NM_016492	ENSG00000108961	RANGRF	HSPC165|HSPC236|MOG1|RANGNRF	RAN guanine nucleotide release factor	protein-coding
6218	chr15	80152667	80153659	+	13	NA	intron (NM_001374377, intron 2 of 14)	CpG	164	NM_000137	2184		NM_000137	ENSG00000103876	FAH	-	fumarylacetoacetate hydrolase	protein-coding
9365	chr7	25668834	25670721	+	13	NA	intron (NR_157808, intron 1 of 4)	intron (NR_157808, intron 1 of 4)	954	NR_157816	646588		NR_157808	ENSG00000223561	LINC03007	-	long intergenic non-protein coding RNA 3007	ncRNA
8387	chr4	16036351	16038222	+	13	NA	intron (NM_006017, intron 3 of 27)	intron (NM_006017, intron 3 of 27)	38832	NM_001145851	8842		NM_006017	ENSG00000007062	PROM1	AC133|CD133|CORD12|MCDR2|MSTP061|PROML1|RP41|STGD4	prominin 1	protein-coding
7499	chr1	1021179	1022450	+	13	NA	intron (NM_198576, intron 1 of 35)	intron (NM_198576, intron 1 of 35)	1694	NM_198576	375790		NM_198576	ENSG00000188157	AGRN	AGRIN|CMS8|CMSPPD	agrin	protein-coding
5711	chr12	58365801	58366734	+	13	NA	Intergenic	AluSc5|SINE|Alu	-225435	NR_126341	100506869		NR_126341	ENSG00000258231	LOC100506869	-	uncharacterized LOC100506869	ncRNA
6413	chr11	45157535	45158698	+	13	NA	intron (NM_001256695, intron 1 of 7)	intron (NM_001256695, intron 1 of 7)	10773	NM_001256695	56981		NM_001256695	ENSG00000019485	PRDM11	PFM8	PR/SET domain 11	protein-coding
5206	chr2	113157534	113158486	+	13	NA	Intergenic	Intergenic	-15961	NM_012455	23550		NM_012455	ENSG00000125637	PSD4	EFA6B|TIC	pleckstrin and Sec7 domain containing 4	protein-coding
5319-3	chr2	134119336	134120191	+	13	NA	promoter-TSS (NM_001371457)	promoter-TSS (NM_001371457)	-172	NM_001371457	4249		NM_002410	ENSG00000152127	MGAT5	GNT-V|GNT-VA|MGAT5A|glcNAc-T V	alpha-1,6-mannosylglycoprotein 6-beta-N-acetylglucosaminyltransferase	protein-coding
6025	chr8	22986696	22987772	+	13	NA	promoter-TSS (NM_001160036)	promoter-TSS (NM_001160036)	-17	NM_001160036	23221		NM_015178	ENSG00000008853	RHOBTB2	DBC2|DEE64|EIEE64|p83	Rho related BTB domain containing 2	protein-coding
8531	chr20	17679896	17681431	+	13	NA	intron (NM_001042576, intron 1 of 25)	MIRb|SINE|MIR	1579	NM_001365613	6238		NM_004587	ENSG00000125844	RRBP1	ES/130|ES130|RRp|hES|p180	ribosome binding protein 1	protein-coding
7366	chr18	47402350	47403612	+	13	NA	intron (NR_147192, intron 1 of 2)	intron (NR_147192, intron 1 of 2)	22485	NR_039753	100616264		NR_039753	ENSG00000266582	MIR4527	-	microRNA 4527	ncRNA
5902-2	chr19	18418067	18419247	+	13	NA	promoter-TSS (NM_001009998)	promoter-TSS (NM_001009998)	-741	NM_032627	170463		NM_032627	ENSG00000130511	SSBP4	-	single stranded DNA binding protein 4	protein-coding
6164	chr14	104799348	104800580	+	13	NA	promoter-TSS (NM_001370342)	promoter-TSS (NM_001370342)	-590	NM_001370342	100128927		NM_001137601	ENSG00000179627	ZBTB42	LCCS6|ZNF925	zinc finger and BTB domain containing 42	protein-coding
7585	chr8	38430050	38431491	+	13	NA	intron (NM_001354367, intron 2 of 17)	intron (NM_001354367, intron 2 of 17)	36954	NM_001174065	2260		NM_015850	ENSG00000077782	FGFR1	BFGFR|CD331|CEK|ECCL|FGFBR|FGFR-1|FLG|FLT-2|FLT2|HBGFR|HH2|HRTFDS|KAL2|N-SAM|OGD|bFGF-R-1	fibroblast growth factor receptor 1	protein-coding
6538	chr14	76984290	76985335	+	13	NA	Intergenic	Intergenic	25174	NR_133913	105370578		NR_133913	ENSG00000258602	LINC01629	linc-KIAA1737-2	long intergenic non-protein coding RNA 1629	ncRNA
9272	chr9	37986575	37988288	+	13	NA	intron (NM_003028, intron 2 of 5)	intron (NM_003028, intron 2 of 5)	81796	NM_003028	6461		NM_003028	ENSG00000107338	SHB	bA3J10.2	SH2 domain containing adaptor protein B	protein-coding
6278-2	chr3	177834451	177835529	+	13	NA	intron (NR_110826, intron 1 of 2)	intron (NR_110826, intron 1 of 2)	18125	NR_110826	102724550		NR_110826	ENSG00000231574	LINC02015	KCCAT211	long intergenic non-protein coding RNA 2015	ncRNA
5266	chr4	62130581	62131520	+	13	NA	intron (NR_110595, intron 3 of 7)	intron (NR_110595, intron 3 of 7)	30715	NR_110595	101927186		NR_110595		ADGRL3-AS1	LPHN3-AS1	ADGRL3 antisense RNA 1	ncRNA
6945	chr19	13905740	13906686	+	13	NA	promoter-TSS (NM_001345848)	promoter-TSS (NM_001345848)	12	NM_017721	54862		NM_017721	ENSG00000132024	CC2D1A	Aki-1|FREUD-1|Freud-1/Aki1|Lgd2|MRT3|TAPE	coiled-coil and C2 domain containing 1A	protein-coding
5525	chr10	75070382	75071326	+	13	NA	intron (NM_001003892, intron 1 of 3)	intron (NM_001003892, intron 1 of 3)	2788	NM_001003892	338599		NM_001003892	ENSG00000188716	DUSP29	DUPD1|DUSP27|FMDSP	dual specificity phosphatase 29	protein-coding
6100	chr22	24415783	24416874	+	13	NA	3' UTR (NM_001254733, exon 9 of 9)	3' UTR (NM_001254733, exon 9 of 9)	-7269	NM_001278500	135		NM_000675	ENSG00000128271	ADORA2A	A2aR|ADORA2|RDC8	adenosine A2a receptor	protein-coding
5567	chr7	4973926	4974902	+	13	NA	intron (NR_023385, intron 1 of 4)	CpG	429	NR_023384	441191		NR_015449	ENSG00000196204	RNF216P1	RNF216L|hCG2040556	ring finger protein 216 pseudogene 1	pseudo
5376	chr20	23421015	23421887	+	13	NA	promoter-TSS (NM_001283018)	promoter-TSS (NM_001283018)	37	NM_022080	63908		NM_022080	ENSG00000125814	NAPB	DEE107|SNAP-BETA|SNAPB	NSF attachment protein beta	protein-coding
7152	chr10	103839937	103841049	+	13	NA	intron (NM_014631, intron 1 of 13)	intron (NM_014631, intron 1 of 13)	14913	NM_014631	9644		NM_014631	ENSG00000107957	SH3PXD2A	FISH|SH3MD1|TKS5	SH3 and PX domains 2A	protein-coding
8563	chr22	24513340	24514825	+	13	NA	intron (NM_016327, intron 5 of 9)	intron (NM_016327, intron 5 of 9)	18750	NM_016327	51733		NM_016327	ENSG00000100024	UPB1	BUP1	beta-ureidopropionase 1	protein-coding
14542	chr17	44990862	44993631	+	13	NA	Intergenic	MIRb|SINE|MIR	-23943	NM_006688	10882		NM_006688	ENSG00000131094	C1QL1	C1QRF|C1QTNF14|CRF|CTRP14	complement C1q like 1	protein-coding
5675-3	chr22_KI270731v1_random	90226	91562	+	13	NA	Intergenic	Intergenic	21752	NR_003267	2679		NR_003267	ENSG00000197421	GGT3P	GGT3	gamma-glutamyltransferase 3 pseudogene	pseudo
5562	chr22	24244629	24245670	+	13	NA	promoter-TSS (NM_001099782)	promoter-TSS (NM_001099782)	-7	NM_001302465	2687		NM_004121	ENSG00000099998	GGT5	GGL|GGT 5|GGT-REL|GGTLA1	gamma-glutamyltransferase 5	protein-coding
7285-2	chr22	20187080	20187995	+	13	NA	Intergenic	Intergenic	17381	NR_038460	284865		NR_038460	ENSG00000249923	LINC02891	lnc-RTN4R-1	long intergenic non-protein coding RNA 2891	ncRNA
6924	chr3	58039619	58040746	+	13	NA	intron (NM_001164319, intron 1 of 44)	intron (NM_001164319, intron 1 of 44)	31760	NM_001457	2317		NM_001457	ENSG00000136068	FLNB	ABP-278|ABP-280|AOI|FH1|FLN-B|FLN1L|LRS1|SCT|TABP|TAP	filamin B	protein-coding
8756-2	chr6	41590749	41592142	+	13	NA	intron (NM_138457, intron 13 of 16)	intron (NM_138457, intron 13 of 16)	-7278	NR_039784	100616178		NR_039784	ENSG00000266494	MIR4641	-	microRNA 4641	ncRNA
5764	chr9	37592101	37592938	+	13	NA	promoter-TSS (NM_001001790)	promoter-TSS (NM_001001790)	78	NM_001001790	401505		NM_001001790	ENSG00000175768	TOMM5	C9orf105|Tom5|bA613M10.3	translocase of outer mitochondrial membrane 5	protein-coding
6245	chr6	109455843	109456902	+	13	NA	promoter-TSS (NM_001159291)	promoter-TSS (NM_001159291)	-385	NM_001159291	64780		NM_022765	ENSG00000135596	MICAL1	MICAL|MICAL-1|NICAL	microtubule associated monooxygenase, calponin and LIM domain containing 1	protein-coding
6196	chr10	75029596	75030638	+	13	NA	exon (NM_001370133, exon 11 of 11)	exon (NM_001370133, exon 11 of 11)	8384	NR_145812	109623471		NR_145812		SNORD172	-	small nucleolar RNA, C/D box 172	snoRNA
5534	chr17	50532264	50533418	+	13	NA	5' UTR (NM_017957, exon 1 of 10)	5' UTR (NM_017957, exon 1 of 10)	106	NM_017957	55040		NM_017957	ENSG00000049283	EPN3	-	epsin 3	protein-coding
5823	chr14	100476084	100477160	+	13	NA	intron (NM_024515, intron 3 of 6)	MIRb|SINE|MIR	71505	NM_001385103	57596		NM_020836	ENSG00000183092	BEGAIN	-	brain enriched guanylate kinase associated	protein-coding
6874-2	chr2	235011944	235012822	+	13	NA	intron (NM_001371304, intron 2 of 5)	intron (NM_001371304, intron 2 of 5)	-15352	NM_001371306	23677		NM_014521	ENSG00000130147	SH3BP4	BOG25|TTP	SH3 domain binding protein 4	protein-coding
6613-2	chr13	40095136	40096394	+	13	NA	Intergenic	Intergenic	-86044	NR_046870	100874127		NR_046870		LINC00332	NCRNA00332	long intergenic non-protein coding RNA 332	ncRNA
6965	chr22	20298763	20299615	+	13	NA	Intergenic	CpG	20871	NM_033257	85359		NM_033257	ENSG00000128185	DGCR6L	DGCR6	DiGeorge syndrome critical region gene 6 like	protein-coding
8102	chr13	29886592	29888091	+	13	NA	intron (NR_046510, intron 1 of 1)	intron (NR_046510, intron 1 of 1)	1064	NR_046510	100874059		NR_046510	ENSG00000224329	LINC00297	NCRNA00297	long intergenic non-protein coding RNA 297	ncRNA
5555	chr1	26938032	26939077	+	13	NA	intron (NM_006600, intron 2 of 8)	intron (NM_006600, intron 2 of 8)	16811	NM_006600	10726		NM_006600	ENSG00000090273	NUDC	HNUDC|MNUDC|NPD011	nuclear distribution C, dynein complex regulator	protein-coding
6049	chr1	3085530	3086605	+	13	NA	intron (NM_199454, intron 1 of 16)	intron (NM_199454, intron 1 of 16)	16864	NM_022114	63976		NM_022114	ENSG00000142611	PRDM16	CMD1LL|KMT8F|LVNC8|MEL1|PFM13	PR/SET domain 16	protein-coding
6203	chr19	49584544	49585667	+	13	NA	intron (NM_000951, intron 4 of 6)	intron (NM_000951, intron 4 of 6)	3789	NM_000951	5639		NM_000951	ENSG00000126460	PRRG2	PRGP2	proline rich and Gla domain 2	protein-coding
7719	chr21	45435376	45436333	+	13	NA	intron (NM_001379500, intron 2 of 41)	intron (NM_001379500, intron 2 of 41)	-10784	NR_027498	378832		NM_199175	ENSG00000183535	COL18A1-AS1	C21orf123|NCRNA00175|PRED80	COL18A1 antisense RNA 1	ncRNA
13445	chr3	129314538	129317450	+	13	NA	promoter-TSS (NR_026991)	promoter-TSS (NR_026991)	-277	NR_026991	339942		NM_001025468		H1-10-AS1	C3orf47|H1FX-AS1	H1-10 antisense RNA 1	ncRNA
6543	chr12	56487672	56488866	+	13	NA	promoter-TSS (NM_001280796)	promoter-TSS (NM_001280796)	-108	NM_013267	27165		NM_013267	ENSG00000135423	GLS2	GA|GLS|LGA|hLGA	glutaminase 2	protein-coding
6119	chr3	50243794	50243937	+	13	NA	intron (NM_001282618, intron 1 of 7)	intron (NM_001282618, intron 1 of 7)	-3045	NM_001166425	2771		NM_002070	ENSG00000114353	GNAI2	GIP|GNAI2B|HG1C|H_LUCA15.1|H_LUCA16.1	G protein subunit alpha i2	protein-coding
6389	chr19	42396535	42397939	+	13	NA	promoter-TSS (NR_073180)	promoter-TSS (NR_073180)	89	NR_073180	100996307		NR_073179	ENSG00000213904	LIPE-AS1	-	LIPE antisense RNA 1	ncRNA
8538	chr11	66719931	66721074	+	13	NA	intron (NM_006946, intron 3 of 37)	intron (NM_006946, intron 3 of 37)	8714	NM_006946	6712		NM_006946	ENSG00000173898	SPTBN2	GTRAP41|SCA5|SCAR14	spectrin beta, non-erythrocytic 2	protein-coding
5760-2	chr4	4032872	4033850	+	13	NA	Intergenic	HERVS71-int|LTR|ERV1	-77933	NR_130740	348926		NR_024253	ENSG00000290374	FAM86EP	-	family with sequence similarity 86, member A pseudogene	pseudo
7642-2	chr3	129312774	129313983	+	13	NA	Intergenic	Intergenic	-2893	NR_026991	339942		NM_001025468		H1-10-AS1	C3orf47|H1FX-AS1	H1-10 antisense RNA 1	ncRNA
5434	chr10	133280604	133281511	+	13	NA	intron (NM_001256618, intron 16 of 16)	(GCTGG)n|Simple_repeat|Simple_repeat	-4189	NM_001109	101		NM_001109	ENSG00000151651	ADAM8	CD156|CD156a|MS2	ADAM metallopeptidase domain 8	protein-coding
6366	chr2	41936885	41937980	+	13	NA	non-coding (NR_161189, exon 4 of 4)	non-coding (NR_161189, exon 4 of 4)	-3709	NR_110262	101929723		NR_110262	ENSG00000234362	LINC01914	-	long intergenic non-protein coding RNA 1914	ncRNA
5298	chr13	41132167	41133155	+	13	NA	promoter-TSS (NR_120423)	promoter-TSS (NR_120423)	141	NM_152903	89890		NM_152903	ENSG00000165572	KBTBD6	-	kelch repeat and BTB domain containing 6	protein-coding
5334	chr3	38007983	38009248	+	13	NA	exon (NM_001130964, exon 12 of 15)	exon (NM_001130964, exon 12 of 15)	14477	NR_163266	50853		NM_015873	ENSG00000136059	VILL	-	villin like	protein-coding
6663	chrX	52261524	52262509	+	13	NA	Intergenic	CpG	71394	NR_102368	101340250		NR_102368	ENSG00000221705	SNORA11E	-	small nucleolar RNA, H/ACA box 11E	snoRNA
5298-3	chr6_GL383533v1_alt	61331	62518	+	13	NA	NA	MER68|LTR|ERVL	NA	NA
6298	chr15	40907831	40908894	+	13	NA	intron (NR_135836, intron 1 of 1)	intron (NR_135836, intron 1 of 1)	1553	NR_135836	105370943		NR_135836		LOC105370943	-	uncharacterized LOC105370943	ncRNA
8511	chr1	9592886	9594429	+	12	NA	intron (NM_001130924, intron 1 of 10)	intron (NM_001130924, intron 1 of 10)	4746	NM_001130924	199953		NM_001010866	ENSG00000188807	TMEM201	Ima1|NET5|SAMP1	transmembrane protein 201	protein-coding
7417	chr3	127541755	127543181	+	12	NA	Intergenic	Intergenic	-4688	NR_125397	101927149		NR_125397	ENSG00000239921	LINC01471	-	long intergenic non-protein coding RNA 1471	ncRNA
5967	chr11	307811	309051	+	12	NA	exon (NM_006435, exon 1 of 2)	exon (NM_006435, exon 1 of 2)	324	NM_006435	10581		NM_006435	ENSG00000185201	IFITM2	1-8D|DSPA2c	interferon induced transmembrane protein 2	protein-coding
5972	chr6	158704293	158705416	+	12	NA	intron (NM_001318745, intron 3 of 14)	intron (NM_001318745, intron 3 of 14)	41451	NM_001318745	94120		NM_001009991	ENSG00000164674	SYTL3	SLP3	synaptotagmin like 3	protein-coding
5356	chr1	116483247	116484436	+	12	NA	Intergenic	Intergenic	-5015	NR_125972	101929023		NR_125972	ENSG00000233154	LINC01762	-	long intergenic non-protein coding RNA 1762	ncRNA
5462	chr20	10110959	10112126	+	12	NA	intron (NR_040710, intron 2 of 4)	intron (NR_040710, intron 2 of 4)	76555	NM_001303472	63926		NM_022096	ENSG00000132623	ANKEF1	ANKRD5	ankyrin repeat and EF-hand domain containing 1	protein-coding
6668	chr11	60906245	60907147	+	12	NA	promoter-TSS (NM_014502)	promoter-TSS (NM_014502)	-111	NM_014502	27339		NM_014502	ENSG00000110107	PRPF19	NMP200|PRP19|PSO4|SNEV|UBOX4|hPSO4	pre-mRNA processing factor 19	protein-coding
9113	chr2	207790343	207791904	+	12	NA	Intergenic	Intergenic	-21217	NM_003468	7855		NM_003468	ENSG00000163251	FZD5	C2orf31|HFZ5|MCOPCB11	frizzled class receptor 5	protein-coding
6620	chr16	1124925	1126146	+	12	NA	Intergenic	Intergenic	-27571	NM_021098	8912		NM_021098	ENSG00000196557	CACNA1H	CACNA1HB|Cav3.2|ECA6|EIG6|HALD4	calcium voltage-gated channel subunit alpha1 H	protein-coding
8418	chr11	370114	372043	+	12	NA	intron (NM_178537, intron 1 of 19)	intron (NM_178537, intron 1 of 19)	1579	NM_178537	338707		NM_178537	ENSG00000182272	B4GALNT4	-	beta-1,4-N-acetyl-galactosaminyltransferase 4	protein-coding
5503	chr10	46031560	46032628	+	12	NA	Intergenic	Intergenic	-1380	NM_001145263	8031		NM_005437	ENSG00000266412	NCOA4	ARA70|ELE1|PTC3|RFG	nuclear receptor coactivator 4	protein-coding
5802	chr20	3163011	3164527	+	12	NA	3' UTR (NM_001365618, exon 5 of 5)	3' UTR (NM_001365618, exon 5 of 5)	-3904	NM_014948	22888		NM_014948	ENSG00000185019	UBOX5	RNF37|UBCE7IP5|UIP5|hUIP5	U-box domain containing 5	protein-coding
7377	chr17	17811532	17812721	+	12	NA	TTS (NM_030665)	TTS (NM_030665)	1419	NR_106835	102465466		NR_106835	ENSG00000274111	MIR6777	hsa-mir-6777	microRNA 6777	ncRNA
5638	chr13	98239282	98240481	+	12	NA	intron (NM_001286839, intron 2 of 27)	intron (NM_001286839, intron 2 of 27)	31357	NR_036129	100422881		NR_036129	ENSG00000263399	MIR3170	mir-3170	microRNA 3170	ncRNA
5390-3	chr3	64872651	64873779	+	12	NA	intron (NR_038264, intron 4 of 5)	MIR|SINE|MIR	-185215	NM_001318781	56999		NM_020249	ENSG00000163638	ADAMTS9	-	ADAM metallopeptidase with thrombospondin type 1 motif 9	protein-coding
6151	chr10	110367931	110369348	+	12	NA	Intergenic	LTR16B2|LTR|ERVL	-63719	NM_005871	10285		NM_005871	ENSG00000119953	SMNDC1	SMNR|SPF30|TDRD16C	survival motor neuron domain containing 1	protein-coding
5708-3	chr3	134366643	134368367	+	12	NA	TTS (NR_106885)	TTS (NR_106885)	357	NR_106885	102466744		NR_106885		MIR6827	hsa-mir-6827	microRNA 6827	ncRNA
5357	chr1	1909032	1909792	+	12	NA	Intergenic	AluSx1|SINE|Alu	-5848	NM_138705	163688		NM_138705	ENSG00000169885	CALML6	CAGLP	calmodulin like 6	protein-coding
9131	chr6	42030337	42031567	+	12	NA	intron (NM_001287434, intron 1 of 4)	intron (NM_001287434, intron 1 of 4)	17942	NM_001287434	896		NM_001760	ENSG00000112576	CCND3	-	cyclin D3	protein-coding
5650	chr2	158892297	158893659	+	12	NA	Intergenic	Intergenic	-75656	NM_001350065	85461		NM_033394	ENSG00000115183	TANC1	ROLSB|TANC	tetratricopeptide repeat, ankyrin repeat and coiled-coil containing 1	protein-coding
5603	chr11	12178768	12179990	+	12	NA	intron (NR_144415, intron 2 of 26)	intron (NR_144415, intron 2 of 26)	15696	NR_106739	102466906		NR_106739	ENSG00000275373	MIR6124	hsa-mir-6124	microRNA 6124	ncRNA
5414-3	chr7	151076783	151077687	+	12	NA	TTS (NM_003040)	TTS (NM_003040)	3574	NM_006712	10922		NM_006712	ENSG00000164896	FASTK	FAST	Fas activated serine/threonine kinase	protein-coding
5392	chr12	95096520	95097390	+	12	NA	intron (NM_018351, intron 14 of 20)	intron (NM_018351, intron 14 of 20)	-23337	NM_001127362	7181		NM_003297	ENSG00000120798	NR2C1	TR2	nuclear receptor subfamily 2 group C member 1	protein-coding
7066	chr19	42284663	42285786	+	12	NA	intron (NM_001379484, intron 1 of 19)	intron (NM_001379484, intron 1 of 19)	755	NM_001379484	23152		NM_015125	ENSG00000079432	CIC	MRD45	capicua transcriptional repressor	protein-coding
6762	chr7	104976656	104977900	+	12	NA	Intergenic	Intergenic	13887	NR_039981	100216546		NR_039981		LINC01004	-	long intergenic non-protein coding RNA 1004	ncRNA
5408	chr17_KI270857v1_alt	207606	208626	+	12	NA	Intergenic	Intergenic	7945	NM_004590	6360		NM_004590	ENSG00000275152	CCL16	CKb12|HCC-4|ILINCK|LCC-1|LEC|LMC|Mtn-1|NCC-4|NCC4|SCYA16|SCYL4	C-C motif chemokine ligand 16	protein-coding
6961	chr1	233112620	233113900	+	12	NA	intron (NM_014801, intron 21 of 33)	intron (NM_014801, intron 21 of 33)	162418	NR_138027	84284		NM_032324	ENSG00000135778	NTPCR	C1orf57|HCR-NTPase|THEP1	nucleoside-triphosphatase, cancer-related	protein-coding
7667	chr5	154444856	154446078	+	12	NA	promoter-TSS (NM_001131062)	promoter-TSS (NM_001131062)	355	NR_037897	386627		NR_037897	ENSG00000245275	SAP30L-AS1	GALNT10-AS1	SAP30L antisense RNA 1 (head to head)	ncRNA
5370	chr2	42341835	42341896	+	12	NA	intron (NM_001319038, intron 2 of 2)	intron (NM_001319038, intron 2 of 2)	18173	NR_134948	9167		NM_004718	ENSG00000115944	COX7A2L	COX7AR|COX7RP|EB1|SCAF1|SCAFI|SIG81	cytochrome c oxidase subunit 7A2 like	protein-coding
5570-2	chr2	54611999	54612774	+	12	NA	intron (NM_178313, intron 3 of 30)	intron (NM_178313, intron 3 of 30)	53992	NM_178313	6711		NM_003128	ENSG00000115306	SPTBN1	DDISBA|ELF|HEL102|SPTB2|betaSpII	spectrin beta, non-erythrocytic 1	protein-coding
5561-2	chr18	49639083	49640266	+	12	NA	Intergenic	MIRc|SINE|MIR	77617	NM_006033	9388		NM_006033	ENSG00000101670	LIPG	EDL|EL|PRO719	lipase G, endothelial type	protein-coding
11058	chr15	40154116	40156202	+	12	NA	Intergenic	Intergenic	-5910	NM_001211	701		NM_001211	ENSG00000156970	BUB1B	BUB1beta|BUBR1|Bub1A|MAD3L|MVA1|SSK1|hBUBR1	BUB1 mitotic checkpoint serine/threonine kinase B	protein-coding
7230	chr17	82440844	82442120	+	12	NA	intron (NM_001369487, intron 13 of 14)	intron (NM_001369487, intron 13 of 14)	8244	NM_001193655	79415		NM_024510	ENSG00000178927	CYBC1	C17orf62|CGD5|Eros	cytochrome b-245 chaperone 1	protein-coding
6400	chr16	89320235	89321412	+	12	NA	non-coding (NR_168302, exon 1 of 4)	non-coding (NR_168302, exon 1 of 4)	371	NR_168302	100287036		NM_001242885		LOC100287036	-	uncharacterized LOC100287036	ncRNA
5594	chr11	78139115	78140313	+	12	NA	promoter-TSS (NM_001007027)	promoter-TSS (NM_001007027)	-61	NM_001007027	79053		NM_024079	ENSG00000159063	ALG8	CDG1H|PCLD3	ALG8 alpha-1,3-glucosyltransferase	protein-coding
5693	chr9	131624310	131625227	+	12	NA	intron (NM_001377935, intron 10 of 26)	intron (NM_001377935, intron 10 of 26)	26635	NM_001377936	2889		NM_005312	ENSG00000107263	RAPGEF1	C3G|GRF2	Rap guanine nucleotide exchange factor 1	protein-coding
5707-2	chr6	33322713	33323911	+	12	NA	promoter-TSS (NM_001141970).3	promoter-TSS (NM_001141970).3	-296	NM_001254717	1616		NM_001350	ENSG00000204209	DAXX	BING2|DAP6|EAP1|SMIM40	death domain associated protein	protein-coding
7319	chr22	37211997	37212918	+	12	NA	promoter-TSS (NM_001051)	promoter-TSS (NM_001051)	20	NM_001051	6753		NM_001051	ENSG00000278195	SSTR3	SS-3-R|SS3-R|SS3R|SSR-28|SST3	somatostatin receptor 3	protein-coding
6916	chr11	61739994	61740954	+	12	NA	exon (NM_006133, exon 18 of 20)	exon (NM_006133, exon 18 of 20)	-12162	NM_001127392	745		NM_013279	ENSG00000124920	MYRF	11orf9|C11orf9|CUGS|MMERV|MRF|Ndt80|pqn-47	myelin regulatory factor	protein-coding
5720	chr19	10352608	10353864	+	12	NA	intron (NM_001385207, intron 21 of 24)	CpG	-13612	NM_002162	3385		NM_002162	ENSG00000076662	ICAM3	CD50|CDW50|ICAM-R	intercellular adhesion molecule 3	protein-coding
5721	chr12	105860446	105861604	+	12	NA	Intergenic	Intergenic	154251	NR_110110	101929110		NR_110108	ENSG00000257859	CASC18	-	cancer susceptibility 18	ncRNA
5528-2	chr13	38946788	38947653	+	12	NA	Intergenic	Intergenic	43611	NM_145286	161003		NM_145286	ENSG00000133115	STOML3	Epb7.2l|SRO	stomatin like 3	protein-coding
6945-2	chr4	683078	684473	+	12	NA	intron (NM_032219, intron 6 of 9)	intron (NM_032219, intron 6 of 9)	5376	NM_001378062	84179		NM_032219	ENSG00000169026	SLC49A3	LP2561|MFSD7	solute carrier family 49 member 3	protein-coding
6710	chr9	123112234	123113694	+	12	NA	non-coding (NR_026677, exon 1 of 1)	non-coding (NR_026677, exon 1 of 1)	-1321	NR_030331	693185		NR_030331	ENSG00000283941	MIR600	MIRN600|hsa-mir-600	microRNA 600	ncRNA
5975-2	chr9	136328011	136329779	+	12	NA	intron (NM_015597, intron 1 of 8)	intron (NM_015597, intron 1 of 8)	1356	NM_015597	26086		NM_015597	ENSG00000160360	GPSM1	AGS3	G protein signaling modulator 1	protein-coding
6103	chr14	64725773	64726997	+	12	NA	intron (NM_001308147, intron 1 of 16)	intron (NM_001308147, intron 1 of 16)	21961	NM_001308147	26030		NM_015549	ENSG00000126822	PLEKHG3	ARHGEF43|KIAA0599	pleckstrin homology and RhoGEF domain containing G3	protein-coding
5424	chr1	21899730	21900463	+	12	NA	intron (NM_001291860, intron 1 of 96)	intron (NM_001291860, intron 1 of 96)	37214	NM_005529	3339		NM_005529	ENSG00000142798	HSPG2	HSPG|PLC|PRCAN|SJA|SJS|SJS1	heparan sulfate proteoglycan 2	protein-coding
5656	chr1	37483296	37484585	+	12	NA	3' UTR (NM_025079, exon 6 of 6)	3' UTR (NM_025079, exon 6 of 6)	3710	NR_106790	102465438		NR_106790	ENSG00000283724	MIR6732	hsa-mir-6732	microRNA 6732	ncRNA
5970-2	chr20	62373860	62375130	+	12	NA	Intergenic	L1M4|LINE|L1	-7183	NM_005560	3911		NM_005560	ENSG00000130702	LAMA5	BBDS2|NPHS26	laminin subunit alpha 5	protein-coding
5748	chr11	117869798	117870838	+	12	NA	intron (NM_001164837, intron 1 of 8)	intron (NM_001164837, intron 1 of 8)	6340	NM_001204268	100533181		NM_001204268	ENSG00000255245	FXYD6-FXYD2	FXYD6	FXYD6-FXYD2 readthrough	protein-coding
8163	chr10	100362397	100363864	+	12	NA	3' UTR (NM_005063, exon 6 of 6)	3' UTR (NM_005063, exon 6 of 6)	-10446	NR_026762	90271		NR_026762	ENSG00000235823	OLMALINC	C10orf75|HI-LNC80|LINC00263|NCRNA00263|OLMALINCAS	oligodendrocyte maturation-associated long intergenic non-coding RNA	ncRNA
6870	chr6	158031355	158032554	+	12	NA	intron (NM_003898, intron 3 of 26)	intron (NM_003898, intron 3 of 26)	14861	NM_001178088	8871		NM_003898	ENSG00000078269	SYNJ2	INPP5H	synaptojanin 2	protein-coding
5992	chr1	22612930	22613959	+	12	NA	Intergenic	Intergenic	19922	NR_106742	102466615		NR_106742	ENSG00000276835	MIR6127	hsa-mir-6127	microRNA 6127	ncRNA
5487	chr22	29225432	29226295	+	12	NA	intron (NM_133455, intron 4 of 14)	intron (NM_133455, intron 4 of 14)	19967	NM_001267895	129080		NM_133455	ENSG00000186998	EMID1	EMI5|EMU1	EMI domain containing 1	protein-coding
5896	chr7	2515468	2516617	+	12	NA	intron (NM_001166355, intron 2 of 8)	intron (NM_001166355, intron 2 of 8)	-1821	NM_002304	3955		NM_002304	ENSG00000106003	LFNG	SCDO3	LFNG O-fucosylpeptide 3-beta-N-acetylglucosaminyltransferase	protein-coding
6320	chr1	48052111	48052935	+	12	NA	Intergenic	Intergenic	-55138	NM_001194986	388630		NM_001194986	ENSG00000269113	TRABD2B	TIKI2	TraB domain containing 2B	protein-coding
7537	chr19	44876703	44877817	+	12	NA	intron (NM_001042724, intron 5 of 8)	intron (NM_001042724, intron 5 of 8)	-13960	NM_001128916	10452		NM_006114	ENSG00000130204	TOMM40	C19orf1|D19S1177E|PER-EC1|PEREC1|TOM40	translocase of outer mitochondrial membrane 40	protein-coding
5819	chr2	149038978	149039975	+	12	NA	intron (NM_001317006, intron 1 of 4)	intron (NM_001317006, intron 1 of 4)	777	NM_177964	130576		NM_177964	ENSG00000150556	LYPD6B	CT116|LYPD7	LY6/PLAUR domain containing 6B	protein-coding
5345-2	chr7	149284999	149285722	+	12	NA	promoter-TSS (NR_036573)	promoter-TSS (NR_036573)	79	NR_036573	155060		NR_015357	ENSG00000290600	LOC155060	-	AI894139 pseudogene	pseudo
5955	chr10	91608146	91609511	+	12	NA	intron (NR_024467, intron 1 of 4)	intron (NR_024467, intron 1 of 4)	2632	NR_024467	100188947		NR_024467		HECTD2-AS1	-	HECTD2 antisense RNA 1	ncRNA
5260	chr3	4532435	4533350	+	12	NA	intron (NM_002222, intron 4 of 57)	L3|LINE|CR1	39544	NM_001378452	3708		NM_002222	ENSG00000150995	ITPR1	ACV|CLA4|INSP3R1|IP3R|IP3R1|PPP1R94|SCA15|SCA16|SCA29	inositol 1,4,5-trisphosphate receptor type 1	protein-coding
5881	chr11	117702952	117704030	+	12	NA	intron (NM_020693, intron 3 of 32)	intron (NM_020693, intron 3 of 32)	93725	NM_020693	57453		NM_020693	ENSG00000177103	DSCAML1	DSCAM2	DS cell adhesion molecule like 1	protein-coding
5929-2	chr22	21203141	21204558	+	12	NA	Intergenic	(AGAC)n|Simple_repeat|Simple_repeat	35984	NR_165621	642633		NM_201565	ENSG00000215498	FAM230B	-	family with sequence similarity 230 member B	ncRNA
6183	chr22	27673484	27674666	+	12	NA	Intergenic	Intergenic	127681	NM_002430	4330		NM_002430	ENSG00000169184	MN1	CEBALID|MGCR|MGCR1|MGCR1-PEN|dJ353E16.2	MN1 proto-oncogene, transcriptional regulator	protein-coding
7345-2	chr3	63015337	63016214	+	12	NA	Intergenic	L1PA8A|LINE|L1	-86913	NR_027104	285401		NR_027104	ENSG00000244342	LINC00698	-	long intergenic non-protein coding RNA 698	ncRNA
7642	chr10	103836557	103838166	+	12	NA	intron (NM_014631, intron 1 of 13)	intron (NM_014631, intron 1 of 13)	18045	NM_014631	9644		NM_014631	ENSG00000107957	SH3PXD2A	FISH|SH3MD1|TKS5	SH3 and PX domains 2A	protein-coding
6392	chr13	98419554	98420883	+	12	NA	intron (NM_001286839, intron 16 of 27)	intron (NM_001286839, intron 16 of 27)	101907	NM_003576	8428		NM_003576	ENSG00000102572	STK24	HEL-S-95|MST3|MST3B|STE20|STK3	serine/threonine kinase 24	protein-coding
5239	chr22	50562654	50563850	+	12	NA	promoter-TSS (NM_001123225)	promoter-TSS (NM_001123225)	-333	NM_001123225	644186		NM_001123225	ENSG00000217442	SYCE3	C22orf41|THEG2	synaptonemal complex central element protein 3	protein-coding
5331	chr8	41818790	41819542	+	12	NA	intron (NM_001142446, intron 1 of 42)	MER61E|LTR|ERV1	-21544	NM_020475	286		NM_000037	ENSG00000029534	ANK1	ANK|SPH1|SPH2|ankyrin-1	ankyrin 1	protein-coding
6151-2	chr5	176073682	176074960	+	12	NA	intron (NR_169299, intron 1 of 26)	intron (NR_169299, intron 1 of 26)	10612	NM_001265615	202134		NM_001079529		FAM153B	-	protein FAM153B	pseudo
7263	chr17	45009470	45011070	+	12	NA	Intergenic	Intergenic	41362	NM_001128631	79877		NM_024819	ENSG00000172992	DCAKD	-	dephospho-CoA kinase domain containing	protein-coding
10002	chr5	155469842	155471989	+	12	NA	Intergenic	Intergenic	457160	NM_001099293	285643		NM_001099293	ENSG00000226650	KIF4B	-	kinesin family member 4B	protein-coding
5623-2	chr5	43007747	43008693	+	12	NA	Intergenic	Intergenic	10591	NR_034085	648987		NR_034085	ENSG00000177738	ANXA2R-OT1	-	ANXA2R overlapping transcript 1	ncRNA
6012	chr19	3054286	3056103	+	12	NA	intron (NM_198969, intron 5 of 6)	intron (NM_198969, intron 5 of 6)	7301	NM_001130	166		NM_001130	ENSG00000104964	TLE5	AES|AES-1|AES-2|ESP1|GRG|GRG5|Grg-5	TLE family member 5, transcriptional modulator	protein-coding
5247	chr10	110426008	110426798	+	12	NA	Intergenic	HAL1|LINE|L1	-71504	NM_004419	1847		NM_004419	ENSG00000138166	DUSP5	DUSP|HVH3	dual specificity phosphatase 5	protein-coding
6174	chr17	1684157	1685381	+	12	NA	promoter-TSS (NM_006445)	promoter-TSS (NM_006445)	98	NM_006445	10594		NM_006445	ENSG00000174231	PRPF8	HPRP8|PRP8|PRPC8|RP13|SNRNP220	pre-mRNA processing factor 8	protein-coding
6326	chr10	69317341	69318654	+	12	NA	promoter-TSS (NM_001322367)	promoter-TSS (NM_001322367)	-184	NM_001322366	3098		NM_000188	ENSG00000156515	HK1	HK|HK1-ta|HK1-tb|HK1-tc|HKD|HKI|HMSNR|HXK1|NEDVIBA|NMSR|RP79|hexokinase	hexokinase 1	protein-coding
5712	chr16	28974056	28975545	+	12	NA	promoter-TSS (NM_001142450)	promoter-TSS (NM_001142450)	22	NM_032038	83985		NM_032038	ENSG00000169682	SPNS1	HSpin1|LAT|PP2030|SLC62A1|SLC63A1|SPIN1|SPINL|nrs	SPNS lysolipid transporter 1, lysophospholipid	protein-coding
8402	chr9	89674468	89675659	+	12	NA	intron (NR_024280, intron 3 of 5)	intron (NR_024280, intron 3 of 5)	35280	NR_024280	100129066		NR_024280	ENSG00000237372	LINC03062	-	long intergenic non-protein coding RNA 3062	ncRNA
5801	chr7	157359918	157361305	+	12	NA	intron (NM_001363676, intron 2 of 6)	intron (NM_001363676, intron 2 of 6)	23607	NM_058246	10049		NM_005494	ENSG00000105993	DNAJB6	DJ4|DnaJ|HHDJ1|HSJ-2|HSJ2|LGMD1D|LGMD1E|LGMDD1|MRJ|MSJ-1	DnaJ heat shock protein family (Hsp40) member B6	protein-coding
6365	chr14	64938503	64939875	+	12	NA	TTS (NR_138078)	TTS (NR_138078)	3556	NR_138078	2877		NM_002083	ENSG00000176153	GPX2	GI-GPx|GPRP|GPRP-2|GPx-2|GPx-GI|GSHPX-GI|GSHPx-2	glutathione peroxidase 2	protein-coding
7361	chr2	121596135	121597055	+	12	NA	intron (NM_001142274, intron 2 of 37)	intron (NM_001142274, intron 2 of 37)	52867	NM_001378003	23332		NM_015282	ENSG00000074054	CLASP1	MAST1	cytoplasmic linker associated protein 1	protein-coding
5781	chr18	27093039	27093854	+	12	NA	intron (NM_031422, intron 2 of 5)	L1PA6|LINE|L1	91862	NM_031422	83539		NM_031422	ENSG00000154080	CHST9	GALNAC4ST-2|GalNAc4ST2	carbohydrate sulfotransferase 9	protein-coding
7391	chr7	151113372	151114023	+	12	NA	promoter-TSS (NM_001308305)	promoter-TSS (NM_001308305)	-941	NM_001308305	116988		NM_031946	ENSG00000133612	AGAP3	AGAP-3|CENTG3|CRAG|MRIP-1|cnt-g3	ArfGAP with GTPase domain, ankyrin repeat and PH domain 3	protein-coding
5425	chr6	52302967	52304434	+	12	NA	Intergenic	Intergenic	-18958	NR_158966	4172		NM_002388	ENSG00000112118	MCM3	HCC5|P1-MCM3|P1.h|RLFB	minichromosome maintenance complex component 3	protein-coding
8193	chr9	136944920	136946937	+	12	NA	intron (NM_000606, intron 2 of 6)	intron (NM_000606, intron 2 of 6)	685	NM_000606	733		NM_000606	ENSG00000176919	C8G	C8C	complement C8 gamma chain	protein-coding
6536	chr1	39412823	39413877	+	12	NA	exon (NM_015038, exon 1 of 1)	exon (NM_015038, exon 1 of 1)	4277	NM_015038	23499		NM_012090	ENSG00000127603	MACF1	ABP620|ACF7|KIAA0754|LIS9|Lnc-PMIF|MACF|OFC4	microtubule actin crosslinking factor 1	protein-coding
6001	chr7	75637978	75639122	+	12	NA	intron (NM_001243198, intron 1 of 28)	intron (NM_001243198, intron 1 of 28)	692	NM_001382444	3092		NM_005338	ENSG00000127946	HIP1	HIP-I|ILWEQ|SHON|SHONbeta|SHONgamma	huntingtin interacting protein 1	protein-coding
6547	chr5	107607726	107608887	+	12	NA	intron (NM_001962, intron 1 of 4)	intron (NM_001962, intron 1 of 4)	62631	NM_001962	1946		NM_001962	ENSG00000184349	EFNA5	AF1|EFL5|EPLG7|GLC1M|LERK7|RAGS	ephrin A5	protein-coding
5799-2	chr9	37430243	37431457	+	12	NA	intron (NM_012203, intron 7 of 8)	L2b|LINE|L2	8154	NM_012203	9380		NM_012203	ENSG00000137106	GRHPR	GLXR|GLYD|PH2	glyoxylate and hydroxypyruvate reductase	protein-coding
8396	chr8	58800837	58802514	+	12	NA	Intergenic	Intergenic	-141822	NM_003580	8439		NM_003580	ENSG00000035681	NSMAF	FAN|GRAMD5	neutral sphingomyelinase activation associated factor	protein-coding
9125	chr11	67277072	67279195	+	12	NA	intron (NM_001619, intron 2 of 20)	MIRb|SINE|MIR	-11170	NM_207354	338692		NM_207354	ENSG00000172932	ANKRD13D	-	ankyrin repeat domain 13D	protein-coding
5371	chr20	16024974	16025843	+	12	NA	intron (NM_001351661, intron 15 of 17)	intron (NM_001351661, intron 15 of 17)	-39526	NR_130924	613266		NR_130924	ENSG00000286546	LOC613266	-	uncharacterized LOC613266	ncRNA
6080	chr11	93529533	93530740	+	12	NA	intron (NM_020179, intron 1 of 2)	intron (NM_020179, intron 1 of 2)	13255	NM_020179	56935		NM_020179	ENSG00000166002	SMCO4	C11orf75|FN5	single-pass membrane protein with coiled-coil domains 4	protein-coding
5536-2	chr15	90191995	90193002	+	12	NA	intron (NM_001324031, intron 1 of 14)	intron (NM_001324031, intron 1 of 14)	577	NM_001324031	10509		NM_020210	ENSG00000185033	SEMA4B	SEMAC|SemC	semaphorin 4B	protein-coding
5729	chr1	26783826	26785074	+	12	NA	Intergenic	Intergenic	-2604	NM_001374478	55650		NM_017837	ENSG00000060642	PIGV	GPI-MT-II|HPMRS1|PIG-V	phosphatidylinositol glycan anchor biosynthesis class V	protein-coding
5549-2	chr2	47263867	47265178	+	12	NA	intron (NR_110207, intron 1 of 2)	intron (NR_110207, intron 1 of 2)	-70793	NR_001568	618		NR_001568	ENSG00000236824	BCYRN1	BC200|BC200a|LINC00004|NCRNA00004	brain cytoplasmic RNA 1	ncRNA
5953	chr5	146027327	146028850	+	12	NA	intron (NM_152550, intron 5 of 9)	intron (NM_152550, intron 5 of 9)	77489	NM_001029869	153770		NM_001029869	ENSG00000173261	PLAC8L1	-	PLAC8 like 1	protein-coding
8416	chr11	77126894	77128553	+	12	NA	promoter-TSS (NM_000260)	promoter-TSS (NM_000260)	-523	NM_001369365	4647		NM_000260	ENSG00000137474	MYO7A	DFNA11|DFNB2|MYOVIIA|MYU7A|NSRD2|USH1B	myosin VIIA	protein-coding
5938-2	chr15	82445077	82446199	+	12	NA	promoter-TSS (NR_120378)	promoter-TSS (NR_120378)	-769	NR_120378	102724034		NR_120378		LOC102724034	-	uncharacterized LOC102724034	ncRNA
5659-2	chr19	31378252	31379115	+	12	NA	Intergenic	Intergenic	-29247	NM_020856	57616		NM_020856	ENSG00000121297	TSHZ3	TSH3|ZNF537	teashirt zinc finger homeobox 3	protein-coding
8059	chrX	40175194	40176782	+	12	NA	intron (NM_001123384, intron 1 of 13)	CpG	1289	NM_001123384	54880		NM_017745	ENSG00000183337	BCOR	ANOP2|MAA2|MCOPS2	BCL6 corepressor	protein-coding
5312-2	chr7	74586205	74587427	+	12	NA	intron (NM_001199207, intron 22 of 26)	intron (NM_001199207, intron 22 of 26)	-9152	NR_162116	113218504		NR_162116		MIR10525	-	microRNA 10525	ncRNA
5916	chr17	78902409	78903908	+	12	NA	promoter-TSS (NM_001243541)	promoter-TSS (NM_001243541)	43	NM_001243541	100653515		NM_001243540	ENSG00000178404	CEP295NL	DDC8|KIAA1731NL	CEP295 N-terminal like	protein-coding
7035	chr1	31440958	31442409	+	12	NA	Intergenic	L2a|LINE|L2	27870	NM_018565	347735		NM_018565	ENSG00000168528	SERINC2	FKSG84|PRO0899|TDE2|TDE2L	serine incorporator 2	protein-coding
5596	chr19	2230779	2231796	+	12	NA	3' UTR (NM_032482, exon 28 of 28)	3' UTR (NM_032482, exon 28 of 28)	2862	NR_031596	100302283		NR_031596	ENSG00000221411	MIR1227	MIRN1227|hsa-mir-1227|mir-1227	microRNA 1227	ncRNA
8774	chr10	104300434	104301465	+	12	NA	3' UTR (NM_001191014, exon 5 of 5)	3' UTR (NM_001191014, exon 5 of 5)	-22415	NR_120622	101927472		NR_120622		ITPRIP-AS1	-	ITPRIP antisense RNA 1	ncRNA
6996	chr11	118926739	118927103	+	12	NA	promoter-TSS (NR_165445)	promoter-TSS (NR_165445)	-995	NM_001378213	283149		NM_182557	ENSG00000186174	BCL9L	B9L|BCL9-2|DLNB11	BCL9 like	protein-coding
5754	chr5	173720332	173720340	+	12	NA	intron (NR_108027, intron 1 of 2)	MER113A|DNA|hAT-Charlie	25873	NR_108027	101928136		NR_108027	ENSG00000253686	LINC01484	-	long intergenic non-protein coding RNA 1484	ncRNA
5465	chr10	113960443	113961356	+	12	NA	Intergenic	Intergenic	-82967	NM_000684	153		NM_000684	ENSG00000043591	ADRB1	ADRB1R|B1AR|BETA1AR|FNSS2|RHR	adrenoceptor beta 1	protein-coding
5677	chr12	75836973	75838149	+	11	NA	Intergenic	Intergenic	194215	NM_007350	22822		NM_007350	ENSG00000139289	PHLDA1	DT1P1B11|PHRIP|TDAG51	pleckstrin homology like domain family A member 1	protein-coding
6664	chr9	93130878	93131962	+	11	NA	intron (NM_004148, intron 1 of 3)	intron (NM_004148, intron 1 of 3)	2831	NM_004148	4814		NM_004148	ENSG00000131669	NINJ1	NIN1|NINJURIN|hNINJ1	ninjurin 1	protein-coding
5423	chr15	61750001	61751063	+	11	NA	Intergenic	Intergenic	20614	NR_146448	100506530		NR_146448	ENSG00000259284	LINC02349	-	long intergenic non-protein coding RNA 2349	ncRNA
5788	chr2_KI270776v1_alt	93195	94335	+	11	NA	intron (NR_110220, intron 1 of 1).2	CpG	304	NR_110220	101927289		NR_110220	ENSG00000233806	LINC01237	-	long intergenic non-protein coding RNA 1237	ncRNA
6105	chr11	2213769	2215123	+	11	NA	Intergenic	Intergenic	41383	NR_039834	100616126		NR_039834	ENSG00000265258	MIR4686	-	microRNA 4686	ncRNA
7021	chr17	72501309	72502642	+	11	NA	intron (NR_036488, intron 1 of 3)	intron (NR_036488, intron 1 of 3)	90829	NR_137281	100499467		NR_036488	ENSG00000227036	LINC00673	ERRLR01|HI-LNC75|HILNC75|LUCAIR1|RASON|SLNCR|SLNCR1	long intergenic non-protein coding RNA 673	ncRNA
5263	chr19	54136999	54137825	+	11	NA	promoter-TSS (NM_014516).8	promoter-TSS (NM_014516).8	-350	NM_014516	4849		NM_014516	ENSG00000088038	CNOT3	IDDSADF|LENG2|NOT3|NOT3H	CCR4-NOT transcription complex subunit 3	protein-coding
5752	chr2	110383057	110384088	+	11	NA	non-coding (NR_046110, exon 2 of 4).2	non-coding (NR_046110, exon 2 of 4).2	953	NR_046112	440894		NR_046110	ENSG00000204588	LINC01123	-	long intergenic non-protein coding RNA 1123	ncRNA
6576	chr17	47830706	47832157	+	11	NA	promoter-TSS (NM_033413)	promoter-TSS (NM_033413)	110	NM_148887	124995		NM_145255	ENSG00000159111	MRPL10	L10MT|MRP-L10|MRP-L8|MRPL8|RPML8|uL10m	mitochondrial ribosomal protein L10	protein-coding
5938-3	chr20	844165	845189	+	11	NA	promoter-TSS (NM_031424)	promoter-TSS (NM_031424)	34	NM_031424	83541		NM_031424	ENSG00000125898	FAM110A	C20orf55|F10|bA371L19.3	family with sequence similarity 110 member A	protein-coding
6669	chr1	153727336	153728046	+	11	NA	promoter-TSS (NM_023015).2	promoter-TSS (NM_023015).2	-359	NM_023015	65123		NM_023015	ENSG00000143624	INTS3	C1orf193|C1orf60|INT3|SOSS-A|SOSSA	integrator complex subunit 3	protein-coding
5817	chr14	95535271	95536319	+	11	NA	promoter-TSS (NR_003138)	promoter-TSS (NR_003138)	745	NM_016417	51218		NM_016417	ENSG00000182512	GLRX5	C14orf87|FLB4739|GRX5|PR01238|PRO1238|PRSA|SIDBA3|SPAHGC	glutaredoxin 5	protein-coding
5651	chr2	128292828	128293940	+	11	NA	intron (NM_004807, intron 1 of 1)	intron (NM_004807, intron 1 of 1)	25484	NM_004807	9394		NM_004807	ENSG00000136720	HS6ST1	HH15|HS6ST	heparan sulfate 6-O-sulfotransferase 1	protein-coding
7571	chr1	204295535	204296875	+	11	NA	intron (NM_014935, intron 1 of 22)	Arthur1A|DNA|hAT-Tip100	63724	NM_014935	22874		NM_014935	ENSG00000143850	PLEKHA6	PEPP-3|PEPP3	pleckstrin homology domain containing A6	protein-coding
8115	chr6	43878231	43879647	+	11	NA	Intergenic	Intergenic	-12089	NR_024478	100132354		NR_024478	ENSG00000289313	LINC01512	HI-LNC77	long intergenic non-protein coding RNA 1512	ncRNA
6155	chrX	48521174	48522364	+	11	NA	promoter-TSS (NM_006579)	promoter-TSS (NM_006579)	-39	NM_006579	10682		NM_006579	ENSG00000147155	EBP	CDPX2|CHO2|CPX|CPXD|MEND	EBP cholestenol delta-isomerase	protein-coding
7268-2	chr13	111139444	111140776	+	11	NA	intron (NM_001113512, intron 1 of 17)	intron (NM_001113512, intron 1 of 17)	8455	NR_046516	100874226		NR_046516		ARHGEF7-AS1	-	ARHGEF7 antisense RNA 1	ncRNA
5427	chr1	44639970	44641444	+	11	NA	intron (NM_001319957, intron 7 of 13)	intron (NM_001319957, intron 7 of 13)	8739	NM_001376489	55182		NM_016501	ENSG00000187147	RNF220	C1orf164|HLD23	ring finger protein 220	protein-coding
5341	chr21	41704148	41705313	+	11	NA	Intergenic	MIRb|SINE|MIR	11045	NR_027272	150135		NM_152506	ENSG00000236384	LINC00479	C21orf129|PRED76	long intergenic non-protein coding RNA 479	ncRNA
5442	chrX	115968337	115969219	+	11	NA	intron (NR_130730, intron 1 of 2)	CpG	333	NR_132337	642776		NR_130730	ENSG00000235244	DANT2	-	DXZ4 associated non-coding transcript 2, distal	ncRNA
6097	chr7	75985200	75986427	+	11	NA	exon (NM_001367562, exon 14 of 17)	exon (NM_001367562, exon 14 of 17)	8782	NM_031925	83862		NM_031925	ENSG00000189077	TMEM120A	NET29|TACAN|TMPIT	transmembrane protein 120A	protein-coding
5512	chr18	12087228	12088382	+	11	NA	Intergenic	(CCTGGC)n|Simple_repeat|Simple_repeat	-6038	NM_001277333	342850		NM_001277333	ENSG00000181626	ANKRD62	DKFZp779B1634	ankyrin repeat domain 62	protein-coding
5529	chr2	185738649	185739349	+	11	NA	promoter-TSS (NR_110215)	promoter-TSS (NR_110215)	94	NR_110214	101927196		NR_110214	ENSG00000226747	FSIP2-AS2	-	FSIP2 antisense RNA 2	ncRNA
7660	chr9	130219372	130220703	+	11	NA	intron (NM_014286, intron 4 of 7)	intron (NM_014286, intron 4 of 7)	19637	NM_001128826	23413		NM_014286	ENSG00000107130	NCS1	FLUP|FREQ	neuronal calcium sensor 1	protein-coding
7716	chr10	102869414	102870805	+	11	NA	non-coding (NR_037644, exon 7 of 15)	non-coding (NR_037644, exon 7 of 15)	639	NM_020682	57412		NM_020682	ENSG00000214435	AS3MT	CYT19	arsenite methyltransferase	protein-coding
6655	chr17	79835350	79836849	+	11	NA	intron (NM_003655, intron 3 of 4)	intron (NM_003655, intron 3 of 4)	3341	NM_003655	8535		NM_003655	ENSG00000141582	CBX4	NBP16|PC2	chromobox 4	protein-coding
5417	chr6	42048235	42049118	+	11	NA	5' UTR (NM_001136017, exon 1 of 5)	5' UTR (NM_001136017, exon 1 of 5)	218	NM_001287434	896		NM_001760	ENSG00000112576	CCND3	-	cyclin D3	protein-coding
6286-2	chr7	47179419	47181036	+	11	NA	Intergenic	Intergenic	284576	NR_145813	109623468		NR_145813		SNORD151	-	small nucleolar RNA, C/D box 151	snoRNA
9434	chr15	77606190	77607898	+	11	NA	Intergenic	Intergenic	25868	NM_032808	84894		NM_032808	ENSG00000169783	LINGO1	LERN1|LRRN6A|MRT64|UNQ201	leucine rich repeat and Ig domain containing 1	protein-coding
6072	chr11	18720946	18722443	+	11	NA	intron (NR_160413, intron 3 of 20)	CpG-4067	4494	NM_173588	283284		NM_173588	ENSG00000179057	IGSF22	IGFN2	immunoglobulin superfamily member 22	protein-coding
5461	chr7	29146080	29147398	+	11	NA	promoter-TSS (NM_031311)	promoter-TSS (NM_031311)	192	NM_001293069	1124		NM_004067	ENSG00000106069	CHN2	ARHGAP3|BCH|CHN2-3|RHOGAP3	chimerin 2	protein-coding
5414-2	chr16	29290276	29291403	+	11	NA	Intergenic	Intergenic	-11448	NR_002939	440352		NR_002939		SNX29P2	RUNDC2C	sorting nexin 29 pseudogene 2	pseudo
5594-2	chr19	12778869	12779710	+	11	NA	Intergenic	Intergenic	-3737	NM_013312	29911		NM_013312	ENSG00000095066	HOOK2	HK2	hook microtubule tethering protein 2	protein-coding
6015-3	chrX	123779787	123780966	+	11	NA	Intergenic	L2a|LINE|L2	-47324	NM_001081550	57187		NM_020449	ENSG00000125676	THOC2	CXorf3|MRX12|MRX35|THO2|XLID12|dJ506G2.1|hTREX120	THO complex subunit 2	protein-coding
6484-2	chr20	51382722	51383652	+	11	NA	Intergenic	Intergenic	69790	NR_036162	100422889		NR_036162	ENSG00000266761	MIR3194	mir-3194	microRNA 3194	ncRNA
5471	chr15	80779016	80779675	+	11	NA	promoter-TSS (NM_018689)	promoter-TSS (NM_018689)	-25	NM_001293304	57214		NM_018689	ENSG00000103888	CEMIP	CCSP1|CEMIP1|HYBID|KIAA1199|TMEM2L	cell migration inducing hyaluronidase 1	protein-coding
6122	chr4	139739926	139741523	+	11	NA	TTS (NM_001204367)	TTS (NM_001204367)	74905	NM_002413	4258		NM_002413	ENSG00000085871	MGST2	GST2|MGST-II	microsomal glutathione S-transferase 2	protein-coding
5283	chr3	47408016	47409583	+	11	NA	exon (NM_015466, exon 16 of 25)	exon (NM_015466, exon 16 of 25)	27778	NM_015466	25930		NM_015466	ENSG00000076201	PTPN23	HD-PTP|HDPTP|NEDBASS|PTP-TD14	protein tyrosine phosphatase non-receptor type 23	protein-coding
5544	chr6	131949926	131950936	+	11	NA	exon (NM_001901, exon 3 of 5)	exon (NM_001901, exon 3 of 5)	941	NM_001901	1490		NM_001901	ENSG00000118523	CCN2	CTGF|HCS24|IBP-8|IGFBP8|NOV2	cellular communication network factor 2	protein-coding
5236	chr15	77989640	77990901	+	11	NA	Intergenic	Intergenic	3955	NR_026998	91450		NR_026998		LOC91450	-	uncharacterized LOC91450	ncRNA
7588	chr3	47010390	47011745	+	11	NA	promoter-TSS (NR_024046)	promoter-TSS (NR_024046)	-475	NR_024046	100129354		NR_024046		NRADDP	-	neurotrophin receptor associated death domain, pseudogene	pseudo
10118	chr11	61717718	61719439	+	11	NA	intron (NM_006133, intron 1 of 19)	intron (NM_006133, intron 1 of 19)	-34058	NM_001127392	745		NM_013279	ENSG00000124920	MYRF	11orf9|C11orf9|CUGS|MMERV|MRF|Ndt80|pqn-47	myelin regulatory factor	protein-coding
5404	chr11	894878	895840	+	11	NA	intron (NM_001142674, intron 8 of 13)	intron (NM_001142674, intron 8 of 13)	15451	NM_001142674	66005		NM_023947	ENSG00000177830	CHID1	GL008|SI-CLP|SICLP	chitinase domain containing 1	protein-coding
6755	chr16	85202385	85203780	+	11	NA	Intergenic	Intergenic	-4714	NR_162142	113219463		NR_162142		MIR12128	-	microRNA 12128	ncRNA
6244	chr12	117968856	117969857	+	11	NA	promoter-TSS (NM_173598)	promoter-TSS (NM_173598)	-366	NM_173598	283455		NM_173598	ENSG00000171435	KSR2	-	kinase suppressor of ras 2	protein-coding
5622-2	chr6	42278928	42280039	+	11	NA	intron (NM_033502, intron 4 of 17)	intron (NM_033502, intron 4 of 17)	-61622	NM_018141	55173		NM_018141	ENSG00000048544	MRPS10	MRP-S10|PNAS-122|uS10m	mitochondrial ribosomal protein S10	protein-coding
5872	chr22	23144600	23145723	+	11	NA	promoter-TSS (NM_001349878)	promoter-TSS (NM_001349878)	-163	NM_001349877	9609		NM_004914	ENSG00000100228	RAB36	-	RAB36, member RAS oncogene family	protein-coding
6427	chr10	79146115	79147444	+	11	NA	intron (NM_020338, intron 3 of 24)	intron (NM_020338, intron 3 of 24)	77813	NM_020338	57178		NM_020338	ENSG00000108175	ZMIZ1	MIZ|NEDDFSA|RAI17|TRAFIP10|ZIMP10	zinc finger MIZ-type containing 1	protein-coding
5522	chr10	100341804	100342080	+	11	NA	Intergenic	AluSg|SINE|Alu	-5291	NM_005063	6319		NM_005063	ENSG00000099194	SCD	FADS5|MSTP008|SCD1|SCDOS|hSCD1	stearoyl-CoA desaturase	protein-coding
5455	chr22	21510338	21511728	+	11	NA	intron (NR_003700, intron 1 of 16)	intron (NR_003700, intron 1 of 16)	6458	NR_003700	375133		NR_003700	ENSG00000293427	PI4KAP2	-	phosphatidylinositol 4-kinase alpha pseudogene 2	pseudo
8895-2	chr9	93192428	93193927	+	11	NA	intron (NM_001282394, intron 1 of 29)	intron (NM_001282394, intron 1 of 29)	8247	NM_006648	65268		NM_006648	ENSG00000165238	WNK2	NY-CO-43|P/OKcl.13|PRKWNK2|SDCCAG43	WNK lysine deficient protein kinase 2	protein-coding
5315	chr11	67053545	67054583	+	11	NA	Intergenic	Intergenic	-2783	NM_014578	29984		NM_014578	ENSG00000173156	RHOD	ARHD|RHOHP1|RHOM|Rho	ras homolog family member D	protein-coding
5935	chr17	50627532	50628696	+	11	NA	TTS (NM_001256330)	TTS (NM_001256330)	-6767	NM_003786	8714		NM_003786	ENSG00000108846	ABCC3	ABC31|EST90757|MLP2|MOAT-D|MRP3|cMOAT2	ATP binding cassette subfamily C member 3	protein-coding
5611-2	chr19	35033254	35034287	+	11	NA	exon (NM_199037, exon 3 of 3)	exon (NM_199037, exon 3 of 3)	2499	NM_001321605	6324		NM_001037	ENSG00000105711	SCN1B	ATFB13|BRGDA5|DEE52|EIEE52|GEFSP1	sodium voltage-gated channel beta subunit 1	protein-coding
5885	chr17	50559649	50560671	+	11	NA	promoter-TSS (NM_001256330)	promoter-TSS (NM_001256330)	-555	NM_198377	8913		NM_018896	ENSG00000006283	CACNA1G	Ca(V)T.1|Cav3.1|NBR13|SCA42|SCA42ND	calcium voltage-gated channel subunit alpha1 G	protein-coding
5334-2	chr6	43369520	43370552	+	11	NA	promoter-TSS (NM_014345)	promoter-TSS (NM_014345)	-389	NM_014345	24149		NM_014345	ENSG00000171467	ZNF318	HRIHFB2436|TZF|ZFP318	zinc finger protein 318	protein-coding
5351	chr4	762131	763085	+	11	NA	intron (NM_001317836, intron 10 of 11)	MSTB2|LTR|ERVL-MaLR	19240	NR_036512	100129917		NR_036511	ENSG00000249592	PCGF3-AS1	-	PCGF3 antisense RNA 1	ncRNA
6116	chr10	86670746	86672102	+	11	NA	intron (NM_001171610, intron 2 of 13)	intron (NM_001171610, intron 2 of 13)	2860	NM_001080116	11155		NM_007078	ENSG00000122367	LDB3	CMD1C|CMH24|CMPD3|CYPHER|LDB3Z1|LDB3Z4|LVNC3|MFM4|ORACLE|PDLIM6|ZASP	LIM domain binding 3	protein-coding
5265	chr13	25973063	25974328	+	11	NA	intron (NM_016529, intron 35 of 36)	intron (NM_016529, intron 35 of 36)	78321	NM_001007538	387914		NM_001007538	ENSG00000180730	SHISA2	C13orf13|PRO28631|TMEM46|WGAR9166|bA398O19.2|hShisa	shisa family member 2	protein-coding
7324	chr4	3245484	3246972	+	11	NA	intron (NM_001330620, intron 2 of 5)	intron (NM_001330620, intron 2 of 5)	1859	NM_001330620	345222		NM_001012982	ENSG00000188981	MSANTD1	C4orf44	Myb/SANT DNA binding domain containing 1	protein-coding
5863	chr12	68331717	68332713	+	11	NA	5' UTR (NM_001354970, exon 1 of 14)	5' UTR (NM_001354970, exon 1 of 14)	147	NM_001368282	56890		NM_017440	ENSG00000111554	MDM1	-	Mdm1 nuclear protein	protein-coding
6166	chr13	79807157	79808422	+	11	NA	Intergenic	MER52A|LTR|ERV1	3403	NR_125785	102724076		NR_125785	ENSG00000229011	LINC01038	-	long intergenic non-protein coding RNA 1038	ncRNA
5699	chr3	126997716	126999327	+	11	NA	intron (NM_032242, intron 2 of 30)	intron (NM_032242, intron 2 of 30)	9927	NM_032242	5361		NM_032242	ENSG00000114554	PLXNA1	DWOPNED|NOV|NOVP|PLEXIN-A1|PLXN1	plexin A1	protein-coding
5294	chr16	50631155	50632171	+	11	NA	intron (NM_033119, intron 8 of 9)	intron (NM_033119, intron 8 of 9)	-37192	NR_110908	101927272		NR_110908		LOC101927272	-	uncharacterized LOC101927272	ncRNA
6476	chr19	3528651	3529672	+	11	NA	intron (NM_001136198, intron 6 of 12)	intron (NM_001136198, intron 6 of 12)	6205	NM_001136197	51343		NM_016263	ENSG00000105325	FZR1	CDC20C|CDH1|DEE109|FZR|FZR2|HCDH|HCDH1	fizzy and cell division cycle 20 related 1	protein-coding
10277	chr2	218995914	218998347	+	11	NA	Intergenic	Intergenic	-3708	NM_057093	1412		NM_057093	ENSG00000163499	CRYBA2	CTRCT42	crystallin beta A2	protein-coding
6459	chr8	74984123	74985371	+	11	NA	5' UTR (NM_031461, exon 1 of 15)	5' UTR (NM_031461, exon 1 of 15)	242	NM_031461	83690		NM_031461	ENSG00000121005	CRISPLD1	CRISP-10|CRISP10|LCRISP1	cysteine rich secretory protein LCCL domain containing 1	protein-coding
7085	chr11	6319308	6320746	+	11	NA	intron (NM_145040, intron 1 of 1)	intron (NM_145040, intron 1 of 1)	474	NM_145040	112464		NM_145040	ENSG00000170955	CAVIN3	HSRBC|PRKCDBP|SRBC|cavin-3	caveolae associated protein 3	protein-coding
5228-3	chr9	38016772	38017003	+	11	NA	intron (NM_003028, intron 1 of 5)	intron (NM_003028, intron 1 of 5)	52340	NM_003028	6461		NM_003028	ENSG00000107338	SHB	bA3J10.2	SH2 domain containing adaptor protein B	protein-coding
5726	chr17	43665285	43666278	+	11	NA	Intergenic	Intergenic	-3859	NM_001040002	4222		NM_004527	ENSG00000005102	MEOX1	KFS2|MOX1	mesenchyme homeobox 1	protein-coding
5831	chr6_GL000252v2_alt	3074820	3076062	+	11	NA	promoter-TSS (NM_005346).3	promoter-TSS (NM_005346).3	-76	NM_005346	3304		NM_005346	ENSG00000204388	HSPA1B	HSP70-1|HSP70-1B|HSP70-2|HSP70.1|HSP70.2|HSP72|HSPA1|HSX70	heat shock protein family A (Hsp70) member 1B	protein-coding
7456	chr14	55806585	55807881	+	11	NA	Intergenic	Intergenic	-10559	NR_026796	645687		NR_026796	ENSG00000258791	LINC00520	C14orf34|LASSIE|LEENE|LncRNA00520	long intergenic non-protein coding RNA 520	ncRNA
7920	chr1	153945084	153946297	+	11	NA	promoter-TSS (NM_001367466)	promoter-TSS (NM_001367466)	-434	NM_001367466	9909		NM_014856	ENSG00000198837	DENND4B	KIAA0476	DENN domain containing 4B	protein-coding
5851	chr15	75761524	75762526	+	11	NA	TTS (NR_036198)	TTS (NR_036198)	290	NR_036198	100423035		NR_036198	ENSG00000284385	MIR4313	-	microRNA 4313	ncRNA
5963	chr3	185716501	185717381	+	11	NA	intron (NR_126326, intron 2 of 7)	intron (NR_126326, intron 2 of 7)	3689	NR_126326	646600		NR_027317	ENSG00000163915	IGF2BP2-AS1	C3orf65	IGF2BP2 antisense RNA 1	ncRNA
5630-2	chr8	56211663	56212510	+	11	NA	promoter-TSS (NM_001114635)	promoter-TSS (NM_001114635)	297	NM_001011671	79145		NM_024300	ENSG00000170791	CHCHD7	COX23	coiled-coil-helix-coiled-coil-helix domain containing 7	protein-coding
10515	chr22	23106282	23108242	+	11	NA	intron (NM_002073, intron 2 of 2)	intron (NM_002073, intron 2 of 2)	34728	NM_014433	27156		NM_014433	ENSG00000100218	RSPH14	RTDR1	radial spoke head 14 homolog	protein-coding
11012	chr16	81639523	81642054	+	11	NA	intron (NM_030629, intron 3 of 20)	MLT1C|LTR|ERVL-MaLR	-24566	NR_045112	100129617		NR_045112		LOC100129617	-	uncharacterized LOC100129617	ncRNA
6070	chr20	32664464	32665238	+	11	NA	intron (NM_182584, intron 1 of 5)	intron (NM_182584, intron 1 of 5)	9090	NM_182584	284805		NM_182584	ENSG00000198547	C20orf203	-	chromosome 20 open reading frame 203	protein-coding
6126-3	chr22	20112292	20113697	+	11	NA	exon (NM_182984, exon 12 of 13)	exon (NM_182984, exon 12 of 13)	1757	NR_106874	102465490		NR_106874	ENSG00000278278	MIR6816	hsa-mir-6816	microRNA 6816	ncRNA
6857-2	chr3	190513584	190514445	+	11	NA	promoter-TSS (NM_001364880)	promoter-TSS (NM_001364880)	-71	NM_134470	3556		NM_002182	ENSG00000196083	IL1RAP	C3orf13|IL-1RAcP|IL1R3	interleukin 1 receptor accessory protein	protein-coding
5809	chr10	132395133	132396586	+	11	NA	Intergenic	Intergenic	-1341	NM_138499	170394		NM_138499	ENSG00000171813	PWWP2B	PWWP2|bA432J24.1|pp8607	PWWP domain containing 2B	protein-coding
5758	chr20	50012167	50013234	+	11	NA	Intergenic	Intergenic	28929	NR_051976	100887755		NR_051976		TRERNA1	LINC00651|treRNA	translation regulatory long non-coding RNA 1	ncRNA
6558	chr1	21924541	21925950	+	11	NA	intron (NM_001291860, intron 1 of 96)	MIRb|SINE|MIR	12065	NM_005529	3339		NM_005529	ENSG00000142798	HSPG2	HSPG|PLC|PRCAN|SJA|SJS|SJS1	heparan sulfate proteoglycan 2	protein-coding
5488	chr7	36091921	36092800	+	11	NA	Intergenic	MER5B|DNA|hAT-Charlie	-2950	NR_108089	101928618		NR_108089	ENSG00000261184	LOC101928618	-	uncharacterized LOC101928618	ncRNA
5580	chr15_KI270905v1_alt	2480459	2481466	+	11	NA	promoter-TSS (NR_026771).3	promoter-TSS (NR_026771).3	6	NR_026771	26082		NR_026771	ENSG00000225930	LINC02249	DKFZP434L187	long intergenic non-protein coding RNA 2249	ncRNA
6146	chr22	18769294	18770603	+	10	NA	Intergenic	Intergenic	22013	NR_003267	2679		NR_003267	ENSG00000197421	GGT3P	GGT3	gamma-glutamyltransferase 3 pseudogene	pseudo
5669	chr15	78374323	78375479	+	10	NA	Intergenic	Intergenic	34548	NM_004378	1381		NM_004378	ENSG00000166426	CRABP1	CRABP|CRABP-I|CRABPI|RBP5	cellular retinoic acid binding protein 1	protein-coding
8037	chr12	132083846	132084713	+	10	NA	promoter-TSS (NR_003290)	promoter-TSS (NR_003290)	-4	NR_003290	347918		NM_182613	ENSG00000291171	EP400P1	EP400NL	EP400 pseudogene 1	pseudo
8109	chr12	7159613	7161355	+	10	NA	Intergenic	Intergenic	-28169	NM_001351124	5830		NM_000319	ENSG00000139197	PEX5	PBD2A|PBD2B|PTS1-BP|PTS1R|PXR1|RCDP5	peroxisomal biogenesis factor 5	protein-coding
5317	chr14	105398232	105399341	+	10	NA	TTS (NM_015197)	TTS (NM_015197)	248	NM_001195082	647310		NM_001195082	ENSG00000226174	TEX22	-	testis expressed 22	protein-coding
6712	chr14	105170348	105171887	+	10	NA	Intergenic	Intergenic	-2341	NM_145159	3714		NM_002226	ENSG00000184916	JAG2	HJ2|LGMDR27|SER2	jagged canonical Notch ligand 2	protein-coding
5270-2	chrX	47321425	47322629	+	10	NA	Intergenic	Intergenic	-48551	NM_003446	7712		NM_003446	ENSG00000147117	ZNF157	HZF22	zinc finger protein 157	protein-coding
5659	chr15	43776062	43777644	+	10	NA	promoter-TSS (NM_001199877)	promoter-TSS (NM_001199877)	113	NM_025165	80237		NM_025165	ENSG00000128886	ELL3	-	elongation factor for RNA polymerase II 3	protein-coding
5310	chr22	19986056	19987185	+	10	NA	intron (NM_001670, intron 3 of 19)	intron (NM_001670, intron 3 of 19)	22867	NR_039918	100616414		NR_039918	ENSG00000284031	MIR4761	-	microRNA 4761	ncRNA
5353-2	chr9	131656280	131657376	+	10	NA	intron (NM_001377935, intron 1 of 26)	intron (NM_001377935, intron 1 of 26)	-5425	NM_001377936	2889		NM_005312	ENSG00000107263	RAPGEF1	C3G|GRF2	Rap guanine nucleotide exchange factor 1	protein-coding
5629	chr17	75129800	75129808	+	10	NA	TTS (NM_001252377)	TTS (NM_001252377)	1938	NM_014595	30833		NM_014595	ENSG00000125458	NT5C	DNT|DNT1|HEL74|P5N2|PN-I|PN-II|UMPH2|cdN|dNT-1	5', 3'-nucleotidase, cytosolic	protein-coding
5675-2	chr12	64609013	64610381	+	10	NA	promoter-TSS (NM_178169)	promoter-TSS (NM_178169)	-798	NR_040718	283349		NM_178169	ENSG00000153179	RASSF3	RASSF5	Ras association domain family member 3	protein-coding
7452-2	chr3	58646904	58648484	+	10	NA	intron (NM_138805, intron 4 of 9)	intron (NM_138805, intron 4 of 9)	19080	NM_138805	131177		NM_138805	ENSG00000198643	FAM3D	EF7|OIT1	FAM3 metabolism regulating signaling molecule D	protein-coding
5401	chr13	43785991	43786957	+	10	NA	intron (NR_145132, intron 1 of 1)	CpG	498	NM_001347966	55068		NM_017993	ENSG00000120658	ENOX1	CNOX|PIG38|bA64J21.1|cCNOX	ecto-NOX disulfide-thiol exchanger 1	protein-coding
5460	chr9	97221845	97222543	+	10	NA	intron (NR_136286, intron 1 of 17)	CpG	-16232	NR_036526	100499484		NR_036526	ENSG00000254876	SUGT1P4-STRA6LP	-	SUGT1P4-STRA6LP readthrough	pseudo
10244	chr3	129388678	129390429	+	10	NA	intron (NR_003111, intron 3 of 3)	LTR14A|LTR|ERVK	7795	NR_002992	677797		NR_002992	ENSG00000207088	SNORA7B	ACA7B	small nucleolar RNA, H/ACA box 7B	snoRNA
5298-2	chr2	67044663	67045749	+	10	NA	Intergenic	Intergenic	-41240	NR_110564	102800447		NR_110564		LINC01828	-	long intergenic non-protein coding RNA 1828	ncRNA
6601	chr17	44779207	44779899	+	10	NA	intron (NM_001318933, intron 26 of 26)	intron (NM_001318933, intron 26 of 26)	20565	NM_001318933	4185		NM_002390	ENSG00000073670	ADAM11	MDC	ADAM metallopeptidase domain 11	protein-coding
5445	chr9	74886740	74887820	+	10	NA	promoter-TSS (NM_001177311)	promoter-TSS (NM_001177311)	67	NM_001177311	140803		NM_017662	ENSG00000119121	TRPM6	CHAK2|HMGX|HOMG|HOMG1|HSH	transient receptor potential cation channel subfamily M member 6	protein-coding
5987	chr4	174828699	174829657	+	10	NA	promoter-TSS (NM_006529)	promoter-TSS (NM_006529)	69	NM_001042543	8001		NM_006529	ENSG00000145451	GLRA3	-	glycine receptor alpha 3	protein-coding
5792-2	chr3	50447270	50448296	+	10	NA	intron (NM_006030, intron 2 of 37)	intron (NM_006030, intron 2 of 37)	55851	NM_001174051	9254		NM_006030	ENSG00000007402	CACNA2D2	CACNA2D|CASVDD	calcium voltage-gated channel auxiliary subunit alpha2delta 2	protein-coding
5903	chr9	131417292	131418950	+	10	NA	intron (NM_013318, intron 1 of 31)	intron (NM_013318, intron 1 of 31)	24035	NM_001384821	84726		NM_013318	ENSG00000288701	PRRC2B	BAT2L|BAT2L1|KIAA0515|LQFBS-1	proline rich coiled-coil 2B	protein-coding
5319	chr1	117565411	117566699	+	10	NA	Intergenic	Intergenic	39715	NR_121626	100996263		NR_121626	ENSG00000236866	TENT5C-DT	-	TENT5C divergent transcript	ncRNA
5413	chr14	34080840	34082017	+	10	NA	Intergenic	Intergenic	-130354	NM_001308103	112399		NM_022073	ENSG00000129521	EGLN3	HIFP4H3|HIFPH3|PHD3	egl-9 family hypoxia inducible factor 3	protein-coding
6202	chr1	15738474	15740215	+	10	NA	TTS (NR_149050)	TTS (NR_149050)	3086	NM_207348	284723		NM_207348	ENSG00000162461	SLC25A34	-	solute carrier family 25 member 34	protein-coding
6388	chr9	136599821	136600864	+	10	NA	Intergenic	Intergenic	16839	NR_135288	401561		NR_135288	ENSG00000279141	LINC01451	HCCAT4	long intergenic non-protein coding RNA 1451	ncRNA
5336	chr9	91036863	91037803	+	10	NA	Intergenic	Intergenic	37799	NR_033912	100129316		NR_033912		LOC100129316	-	uncharacterized LOC100129316	ncRNA
5404-2	chr8	60911558	60912206	+	10	NA	Intergenic	Intergenic	-1084	NR_168430	105375938		NR_168430		LOC105375938	-	uncharacterized LOC105375938	ncRNA
5228	chr10	1420672	1421342	+	10	NA	intron (NM_018702, intron 1 of 9)	intron (NM_018702, intron 1 of 9)	-105623	NR_033387	642394		NM_001098830	ENSG00000205696	ADARB2-AS1	C10orf109|NCRNA00168	ADARB2 antisense RNA 1	ncRNA
8646	chr1	32215410	32217329	+	10	NA	TTS (NM_001099434)	TTS (NM_001099434)	-5215	NM_003757	8668		NM_003757	ENSG00000084623	EIF3I	EIF3S2|PRO2242|TRIP-1|TRIP1|eIF3-beta|eIF3-p36	eukaryotic translation initiation factor 3 subunit I	protein-coding
6804	chr9	95089106	95091020	+	10	NA	Intergenic	Intergenic	-3969	NR_036109	100422842		NR_036109	ENSG00000207617	MIR3074	mir-3074	microRNA 3074	ncRNA
5739	chr10	13271514	13272258	+	10	NA	Intergenic	Intergenic	27860	NM_001037537	5264		NM_006214	ENSG00000107537	PHYH	LN1|LNAP1|PAHX|PHYH1|RD	phytanoyl-CoA 2-hydroxylase	protein-coding
6144	chr22	24133042	24134265	+	10	NA	intron (NM_012295, intron 28 of 36)	intron (NM_012295, intron 28 of 36)	-47834	NM_019601	56241		NM_019601	ENSG00000099994	SUSD2	BK65A6.2|W5C5	sushi domain containing 2	protein-coding
5982	chr3	76149470	76150725	+	10	NA	Intergenic	Intergenic	-160783	NM_001378199	6092		NM_002942	ENSG00000185008	ROBO2	SAX3	roundabout guidance receptor 2	protein-coding
5469	chr1	15088556	15089809	+	10	NA	intron (NM_201628, intron 8 of 14)	intron (NM_201628, intron 8 of 14)	63282	NR_027136	200197		NM_182534	ENSG00000175147	TMEM51-AS1	C1orf126	TMEM51 antisense RNA 1	ncRNA
6588	chrY	15454803	15456456	+	10	NA	Intergenic	Intergenic	-651596	NR_046504	100874056		NR_046504	ENSG00000228787	NLGN4Y-AS1	NLGN4Y-AS|NLGN4YAS	NLGN4Y antisense RNA 1	ncRNA
5328	chr7	74306296	74307389	+	10	NA	intron (NM_032421, intron 1 of 15)	MIRb|SINE|MIR	17435	NM_032421	7461		NM_003388	ENSG00000106665	CLIP2	CLIP|CLIP-115|CYLN2|WBSCR3|WBSCR4|WSCR3|WSCR4	CAP-Gly domain containing linker protein 2	protein-coding
5223	chr11	73140769	73142128	+	10	NA	intron (NM_014824, intron 1 of 19)	CpG	870	NM_014824	9873		NM_014824	ENSG00000137478	FCHSD2	NWK|NWK1|SH3MD3	FCH and double SH3 domains 2	protein-coding
5494-3	chr2	8633841	8635172	+	10	NA	Intergenic	Intergenic	47355	NR_110153	100506299		NR_110153		ID2-AS1	-	ID2 antisense RNA 1	ncRNA
6384	chr13	98217341	98218668	+	10	NA	intron (NM_001286839, intron 2 of 27)	intron (NM_001286839, intron 2 of 27)	9480	NR_036129	100422881		NR_036129	ENSG00000263399	MIR3170	mir-3170	microRNA 3170	ncRNA
7879-2	chr9	126672947	126673007	+	10	NA	intron (NM_001174147, intron 2 of 7)	intron (NM_001174147, intron 2 of 7)	59049	NM_001174147	4010		NM_002316	ENSG00000136944	LMX1B	FSGS10|LMX1.2|NPS1	LIM homeobox transcription factor 1 beta	protein-coding
5634	chr11	61149953	61151054	+	10	NA	intron (NM_017966, intron 1 of 4)	intron (NM_017966, intron 1 of 4)	10923	NM_017966	55048		NM_017966	ENSG00000167987	VPS37C	-	VPS37C subunit of ESCRT-I	protein-coding
6622-2	chr20	49886677	49887959	+	10	NA	intron (NR_048540, intron 11 of 11)	intron (NR_048540, intron 11 of 11)	23459	NR_162136	113219455		NR_162136		MIR12122	-	microRNA 12122	ncRNA
5494-2	chr16	81652613	81653636	+	10	NA	intron (NM_030629, intron 4 of 20)	MIR|SINE|MIR	-12230	NR_045112	100129617		NR_045112		LOC100129617	-	uncharacterized LOC100129617	ncRNA
5915	chr20	38925622	38927085	+	10	NA	promoter-TSS (NM_030919)	promoter-TSS (NM_030919)	-64	NM_030919	81610		NM_030919	ENSG00000101447	FAM83D	C20orf129|CHICA|dJ616B8.3	family with sequence similarity 83 member D	protein-coding
5447	chr21	14057376	14058729	+	10	NA	Intergenic	G-rich|Low_complexity|Low_complexity	-77608	NR_027270	391267		NM_153750	ENSG00000291280	ANKRD20A11P	C21orf81	ankyrin repeat domain 20 family member A11, pseudogene	pseudo
6492	chr19	45103635	45105117	+	10	NA	intron (NM_019121, intron 1 of 12)	intron (NM_019121, intron 1 of 12)	11197	NM_019121	284352		NM_019121	ENSG00000104866	PPP1R37	LRRC68	protein phosphatase 1 regulatory subunit 37	protein-coding
5574	chr12	89390206	89391662	+	10	NA	Intergenic	Intergenic	-38433	NM_001946	1848		NM_001946	ENSG00000139318	DUSP6	HH19|MKP3|PYST1	dual specificity phosphatase 6	protein-coding
5773	chr14	100677252	100678608	+	10	NA	Intergenic	Intergenic	20662	NR_024096	283601		NM_001007560	ENSG00000196273	LINC00523	C14orf70	long intergenic non-protein coding RNA 523	ncRNA
6886-2	chr3	48421763	48422749	+	10	NA	intron (NM_002673, intron 5 of 37)	intron (NM_002673, intron 5 of 37)	7207	NM_002673	5364		NM_002673	ENSG00000164050	PLXNB1	PLEXIN-B1|PLXN5|SEP	plexin B1	protein-coding
6498	chr19	41327641	41328212	+	10	NA	Intergenic	Intergenic	17449	NM_001346100	90324		NM_052848	ENSG00000142039	CCDC97	-	coiled-coil domain containing 97	protein-coding
5427-2	chr8	579212	580441	+	10	NA	Intergenic	Intergenic	-34046	NM_175075	157695		NM_175075	ENSG00000180190	TDRP	C8orf42|Inm01|TDRP1|TDRP2	testis development related protein	protein-coding
5279-2	chr3	129595003	129595938	+	10	NA	intron (NM_015103, intron 1 of 35)	intron (NM_015103, intron 1 of 35)	11206	NM_015103	23129		NM_015103	ENSG00000004399	PLXND1	CHTD9|PLEXD1	plexin D1	protein-coding
6050	chr12	120092731	120094268	+	10	NA	non-coding (NR_147892, exon 12 of 12)	non-coding (NR_147892, exon 12 of 12)	23254	NM_006861	11021		NM_006861	ENSG00000111737	RAB35	H-ray|RAB1C|RAY	RAB35, member RAS oncogene family	protein-coding
7601-2	chr3	46990907	46991197	+	10	NA	intron (NM_001365116, intron 6 of 52)	intron (NM_001365116, intron 6 of 52)	3062	NM_001365116	23218		NM_015175	ENSG00000160796	NBEAL2	BDPLT4|GPS	neurobeachin like 2	protein-coding
6863-2	chr6	14211330	14212334	+	10	NA	Intergenic	Intergenic	73622	NR_108096	102216342		NR_108096	ENSG00000226673	LINC01108	LncRNA-ES1	long intergenic non-protein coding RNA 1108	ncRNA
5268	chr5	60944806	60945923	+	10	NA	promoter-TSS (NM_001007234)	promoter-TSS (NM_001007234)	159	NM_174889	91942		NM_174889	ENSG00000164182	NDUFAF2	B17.2L|MC1DN10|MMTN|NDUFA12L|mimitin	NADH:ubiquinone oxidoreductase complex assembly factor 2	protein-coding
6841	chr19	13870803	13872139	+	10	NA	intron (NR_146097, intron 1 of 1)	intron (NR_146097, intron 1 of 1)	-3228	NR_029613	406957		NR_029613	ENSG00000207613	MIR181C	MIRN181C|mir-181c	microRNA 181c	ncRNA
6401-2	chr11	121067465	121069003	+	10	NA	intron (NM_001378761, intron 7 of 29)	L2a|LINE|L2	-33009	NM_005422	7007		NM_005422	ENSG00000109927	TECTA	DFNA12|DFNA8|DFNB21	tectorin alpha	protein-coding
5283-2	chr3	197547119	197548111	+	10	NA	intron (NM_203315, intron 1 of 6)	L2a|LINE|L2	8353	NM_004051	622		NM_004051	ENSG00000161267	BDH1	BDH|SDR9C1	3-hydroxybutyrate dehydrogenase 1	protein-coding
5878	chr17	72591642	72593138	+	10	NA	non-coding (NR_137281, exon 1 of 5)	non-coding (NR_137281, exon 1 of 5)	414	NR_137281	100499467		NR_036488	ENSG00000227036	LINC00673	ERRLR01|HI-LNC75|HILNC75|LUCAIR1|RASON|SLNCR|SLNCR1	long intergenic non-protein coding RNA 673	ncRNA
7148	chr22	22291316	22292732	+	10	NA	Intergenic	G-rich|Low_complexity|Low_complexity	-6074	NR_027293	96610		NM_080926		BMS1P20	IGL|IGLV|IGLV1	BMS1 pseudogene 20	pseudo
6244-3	chr7	1874700	1875921	+	10	NA	intron (NM_001304524, intron 16 of 16)	intron (NM_001304524, intron 16 of 16)	-31057	NR_039799	100616160		NR_039799	ENSG00000265089	MIR4655	-	microRNA 4655	ncRNA
7370	chr18	46334706	46336042	+	10	NA	intron (NM_001256758, intron 1 of 5)	intron (NM_001256758, intron 1 of 5)	1150	NR_046357	494470		NM_152470	ENSG00000141622	ARK2C	ARKL2|RNF111L2|RNF165|lncAMPC	arkadia (RNF111) C-terminal like ring finger ubiquitin ligase 2C	protein-coding
6365-2	chr20	62303349	62304776	+	10	NA	intron (NM_001281437, intron 2 of 8)	intron (NM_001281437, intron 2 of 8)	1065	NM_007002	11047		NM_007002	ENSG00000130706	ADRM1	ARM-1|ARM1|GP110|PSMD16	ADRM1 26S proteasome ubiquitin receptor	protein-coding
6126-2	chr2	109987298	109988392	+	10	NA	non-coding (NR_046110, exon 2 of 4)	non-coding (NR_046110, exon 2 of 4)	865	NR_046110	440894		NR_046110	ENSG00000204588	LINC01123	-	long intergenic non-protein coding RNA 1123	ncRNA
6064	chr19	12912383	12913711	+	10	NA	intron (NM_001105578, intron 2 of 5)	intron (NM_001105578, intron 2 of 5)	6246	NM_001105578	256126		NM_001105578	ENSG00000161860	SYCE2	CESC1	synaptonemal complex central element protein 2	protein-coding
5437	chr12	111368347	111369453	+	10	NA	intron (NM_144671, intron 1 of 2)	CpG	195	NM_001177997	144717		NM_144671	ENSG00000198324	PHETA1	FAM109A|IPIP27A|SES1	PH domain containing endocytic trafficking adaptor 1	protein-coding
7224	chr1	161463931	161465832	+	10	NA	Intergenic	CpG	-40576	NM_021642	2212		NM_021642	ENSG00000143226	FCGR2A	CD32|CD32A|CDw32|FCG2|FCGR2|FCGR2A1|FcGR|FcgammaRIIa|IGFR2	Fc gamma receptor IIa	protein-coding
5444	chr16	2092416	2092461	+	10	NA	intron (NM_001009944, intron 39 of 45)	intron (NM_001009944, intron 39 of 45)	1002	NR_135175	105371049		NR_135175	ENSG00000259933	PKD1-AS1	-	PKD1 antisense RNA 1	ncRNA
5536	chr13	113583451	113584789	+	10	NA	promoter-TSS (NM_007111)	promoter-TSS (NM_007111)	-568	NR_026580	7027		NM_007111	ENSG00000198176	TFDP1	DILC|DP1|DRTF1|Dp-1	transcription factor Dp-1	protein-coding
5879	chr15	66778962	66780386	+	10	NA	intron (NR_027654, intron 4 of 4)	intron (NR_027654, intron 4 of 4)	77438	NR_027654	4091		NM_005585	ENSG00000137834	SMAD6	AOVD2|HsT17432|MADH6|MADH7	SMAD family member 6	protein-coding
7190	chr1	43986882	43988238	+	10	NA	intron (NM_003780, intron 6 of 6)	L2a|LINE|L2	-4036	NM_001349127	149473		NM_152499	ENSG00000159214	CCDC24	-	coiled-coil domain containing 24	protein-coding
5270	chr19	40800054	40801219	+	10	NA	exon (NM_080732, exon 2 of 6)	exon (NM_080732, exon 2 of 6)	1114	NM_053046	112398		NM_017555	ENSG00000269858	EGLN2	EIT-6|EIT6|HIF-PH1|HIFPH1|HPH-1|HPH-3|PHD1	egl-9 family hypoxia inducible factor 2	protein-coding
7738	chr14	103536089	103537171	+	10	NA	3' UTR (NM_152307, exon 4 of 4)	3' UTR (NM_152307, exon 4 of 4)	7434	NM_152307	115708		NM_152307	ENSG00000166166	TRMT61A	C14orf172|GCD14|Gcd14p|TRM61|hTRM61	tRNA methyltransferase 61A	protein-coding
5245-2	chr22	38229254	38230536	+	10	NA	intron (NM_001195071, intron 5 of 8)	intron (NM_001195071, intron 5 of 8)	-5175	NR_132774	106635525		NR_132774		SNORA92	-	small nucleolar RNA, H/ACA box 92	snoRNA
6422	chr15	42155552	42156572	+	10	NA	intron (NM_213600, intron 1 of 19)	intron (NM_213600, intron 1 of 19)	574	NM_213600	255189		NM_213600	ENSG00000168907	PLA2G4F	PLA2G4FZ	phospholipase A2 group IVF	protein-coding
9535	chr11	2302008	2304169	+	10	NA	promoter-TSS (NR_138249)	promoter-TSS (NR_138249)	52	NR_138249	29125		NM_014144	ENSG00000110665	C11orf21	-	chromosome 11 open reading frame 21	protein-coding
6784	chr16	68745664	68747564	+	10	NA	intron (NM_004360, intron 2 of 15)	intron (NM_004360, intron 2 of 15)	9322	NM_001317184	999		NM_004360	ENSG00000039068	CDH1	Arc-1|BCDS1|CD324|CDHE|ECAD|LCAM|UVO	cadherin 1	protein-coding
5293	chr10	109966691	109967780	+	10	NA	intron (NR_038943, intron 2 of 4)	intron (NR_038943, intron 2 of 4)	-29138	NM_001320591	120		NM_001121	ENSG00000148700	ADD3	ADDL|CPSQ3	adducin 3	protein-coding
5708	chr16	3059030	3060396	+	9	NA	promoter-TSS (NR_123723)	promoter-TSS (NR_123723)	-343	NR_123723	100507419		NR_123723		MMP25-AS1	-	MMP25 antisense RNA 1	ncRNA
5767	chr16	78250316	78252226	+	9	NA	intron (NM_016373, intron 5 of 8)	intron (NM_016373, intron 5 of 8)	151617	NR_120436	51741		NM_016373	ENSG00000186153	WWOX	D16S432E|DEE28|EIEE28|FOR|FRA16D|HHCMA56|PRO0128|SCAR12|SDR41C1|WOX1	WW domain containing oxidoreductase	protein-coding
6067	chr21	45453933	45455717	+	9	NA	promoter-TSS (NM_130444)	promoter-TSS (NM_130444)	-697	NM_030582	80781		NM_030582	ENSG00000182871	COL18A1	GLCC|KNO|KNO1|KS	collagen type XVIII alpha 1 chain	protein-coding
7741	chr15	84858041	84860341	+	9	NA	intron (NM_020778, intron 6 of 13)	intron (NM_020778, intron 6 of 13)	-25470	NM_001287761	9154		NM_004213	ENSG00000156222	SLC28A1	CNT1|HCNT1|URCTU	solute carrier family 28 member 1	protein-coding
5718	chr9	94909601	94910820	+	9	NA	intron (NM_032823, intron 5 of 14)	intron (NM_032823, intron 5 of 14)	35344	NR_147614	101928119		NR_147613		LOC101928119	-	uncharacterized LOC101928119	ncRNA
5511	chr10	102399349	102400203	+	9	NA	intron (NM_001288724, intron 14 of 22)	CpG-3308	4071	NM_001261403	4791		NM_002502	ENSG00000077150	NFKB2	CVID10|H2TF1|LYT-10|LYT10|NF-kB2|p100|p49/p100|p52	nuclear factor kappa B subunit 2	protein-coding
9457	chr9	136629555	136631980	+	9	NA	Intergenic	(ACAC)n|Simple_repeat|Simple_repeat	-13586	NR_135288	401561		NR_135288	ENSG00000279141	LINC01451	HCCAT4	long intergenic non-protein coding RNA 1451	ncRNA
6880	chr8	85736236	85737869	+	9	NA	non-coding (NR_003594, exon 1 of 1).4	non-coding (NR_003594, exon 1 of 1).4	754	NR_003594	100288527		NR_003594		REXO1L2P	-	REXO1 like 2, pseudogene	pseudo
6381	chr8	144531259	144532892	+	9	NA	intron (NM_001308207, intron 10 of 11)	intron (NM_001308207, intron 10 of 11)	-2964	NM_001001795	414919		NM_001001795	ENSG00000213563	C8orf82	-	chromosome 8 open reading frame 82	protein-coding
5629-2	chr5_GL339449v2_alt	997109	998614	+	9	NA	promoter-TSS (NM_001515)	promoter-TSS (NM_001515)	55	NM_001515	2966		NM_001515	ENSG00000145736	GTF2H2	BTF2|BTF2 p44|BTF2P44|T-BTF2P44|TFIIH|p44	general transcription factor IIH subunit 2	protein-coding
5929	chr19	38203043	38204376	+	9	NA	intron (NM_015073, intron 20 of 21)	intron (NM_015073, intron 20 of 21)	20513	NM_004647	8193		NM_004647	ENSG00000011332	DPF1	BAF45b|NEUD4|SMARCG1|neuro-d4	double PHD fingers 1	protein-coding
5307	chr1	16630805	16631903	+	9	NA	promoter-TSS (NR_026752)	promoter-TSS (NR_026752)	-448	NR_026752	84809		NM_032723		CROCCP2	CROCCL1	CROCC pseudogene 2	pseudo
5348	chr4	717377	718815	+	9	NA	intron (NM_001317836, intron 1 of 11)	intron (NM_001317836, intron 1 of 11)	12264	NM_006315	10336		NM_006315	ENSG00000185619	PCGF3	DONG1|RNF3|RNF3A	polycomb group ring finger 3	protein-coding
5491	chr19	18416580	18417834	+	9	NA	Intergenic	CpG	-2191	NM_032627	170463		NM_032627	ENSG00000130511	SSBP4	-	single stranded DNA binding protein 4	protein-coding
7493	chr6_GL000255v2_alt	188589	190220	+	9	NA	5' UTR (NM_006510, exon 1 of 8).3	5' UTR (NM_006510, exon 1 of 8).3	163	NM_006510	5987		NM_006510	ENSG00000204713	TRIM27	RFP|RNF76	tripartite motif containing 27	protein-coding
5779	chr5	51382643	51383718	+	9	NA	promoter-TSS (NM_002202)	promoter-TSS (NM_002202)	152	NR_046243	642366		NR_046243		ISL1-DT	-	ISL1 divergent transcript	ncRNA
6268	chr15	85578955	85580991	+	9	NA	exon (NM_006738, exon 7 of 37)	exon (NM_006738, exon 7 of 37)	-39977	NM_001270546	11214		NM_006738	ENSG00000170776	AKAP13	AKAP-13|AKAP-Lbc|ARHGEF13|BRX|HA-3|Ht31|LBC|PRKA13|PROTO-LB|PROTO-LBC|c-lbc|p47	A-kinase anchoring protein 13	protein-coding
7242-2	chr2	110024961	110026743	+	9	NA	Intergenic	Intergenic	38872	NR_046110	440894		NR_046110	ENSG00000204588	LINC01123	-	long intergenic non-protein coding RNA 1123	ncRNA
6278	chr15	84734759	84736018	+	9	NA	Intergenic	Intergenic	-13204	NM_014630	9640		NM_014630	ENSG00000166716	ZNF592	CAMOS|SCAR5	zinc finger protein 592	protein-coding
7162	chr16_KI270855v1_alt	14273	15998	+	9	NA	promoter-TSS (NM_001318918)	promoter-TSS (NM_001318918)	10	NM_001318918	84662		NM_032575	ENSG00000126603	GLIS2	NKL|NPHP7	GLIS family zinc finger 2	protein-coding
6539-2	chr16	89097329	89099116	+	9	NA	intron (NM_001127214, intron 1 of 9)	intron (NM_001127214, intron 1 of 9)	4370	NR_147928	197322		NM_174917	ENSG00000176715	ACSF3	-	acyl-CoA synthetase family member 3	protein-coding
6130	chr21	45511932	45514334	+	9	NA	3' UTR (NM_001205207, exon 5 of 5)	3' UTR (NM_001205207, exon 5 of 5)	21623	NM_001205207	6573		NM_003056	ENSG00000173638	SLC19A1	CHMD|FOLT|IFC-1|IFC1|IMD114|MEGAF|REFC|RFC|RFC1|RFT-1|hRFC|hSLC19A1	solute carrier family 19 member 1	protein-coding
5558	chr15	72218928	72220525	+	9	NA	intron (NM_182471, intron 1 of 10)	intron (NM_182471, intron 1 of 10)	10185	NM_001206799	5315		NM_002654	ENSG00000067225	PKM	CTHBP|HEL-S-30|OIP3|PK3|PKM2|TCB|THBP1|p58	pyruvate kinase M1/2	protein-coding
8403	chr1	3611291	3612829	+	9	NA	promoter-TSS (NM_001409)	promoter-TSS (NM_001409)	-552	NM_001409	1953		NM_001409	ENSG00000162591	MEGF6	EGFL3	multiple EGF like domains 6	protein-coding
6023	chr3	181710521	181711753	+	9	NA	promoter-TSS (NM_003106)	promoter-TSS (NM_003106)	-788	NM_003106	6657		NM_003106	ENSG00000181449	SOX2	ANOP3|MCOPS3	SRY-box transcription factor 2	protein-coding
6174-2	chr7	102510065	102511724	+	9	NA	intron (NM_001367767, intron 2 of 20)	intron (NM_001367767, intron 2 of 20)	6883	NM_001367767	100271927		NM_001277335	ENSG00000170667	RASA4B	-	RAS p21 protein activator 4B	protein-coding
5730	chr1	203640698	203641774	+	9	NA	intron (NM_001365784, intron 1 of 20)	intron (NM_001365784, intron 1 of 20)	13299	NM_001365784	493		NM_001684	ENSG00000058668	ATP2B4	ATP2B2|MXRA1|PMCA4|PMCA4b|PMCA4x	ATPase plasma membrane Ca2+ transporting 4	protein-coding
6204	chr2	149098686	149100284	+	9	NA	intron (NM_001317004, intron 1 of 6)	intron (NM_001317004, intron 1 of 6)	-18689	NM_001317002	130576		NM_177964	ENSG00000150556	LYPD6B	CT116|LYPD7	LY6/PLAUR domain containing 6B	protein-coding
6347	chr1	225810280	225811579	+	9	NA	intron (NM_001378426, intron 2 of 9)	LTR7|LTR|ERV1	805	NM_001136018	2052		NM_000120	ENSG00000143819	EPHX1	EPHX|EPOX|HYL1|MEH	epoxide hydrolase 1	protein-coding
5579	chr17	49569850	49571347	+	9	NA	intron (NR_103773, intron 1 of 2)	MIRb|SINE|MIR	3466	NR_103773	100288866		NR_103773	ENSG00000249906	NGFR-AS1	-	NGFR antisense RNA 1	ncRNA
5678	chr17	41189827	41190976	+	9	NA	exon (NM_001190460, exon 1 of 1)	exon (NM_001190460, exon 1 of 1)	514	NM_001190460	728318		NM_001190460	ENSG00000240542	KRTAP9-1	KAP9.1|KRTAP9L3	keratin associated protein 9-1	protein-coding
5850	chr2	109676421	109676847	+	9	NA	Intergenic	Intergenic	62270	NM_023016	65124		NM_023016	ENSG00000198142	SOWAHC	ANKRD57|C2orf26	sosondowah ankyrin repeat domain family member C	protein-coding
5939	chr2	5914805	5916195	+	9	NA	Intergenic	Intergenic	-17187	NR_026832	150622		NM_153011		SILC1	LINC01105	sciatic injury induced lincRNA upregulator of SOX11	ncRNA
5837	chr17	74968202	74969118	+	9	NA	intron (NM_030630, intron 1 of 18)	intron (NM_030630, intron 1 of 18)	-2029	NR_110878	102723641		NR_110878	ENSG00000263586	HID1-AS1	-	HID1 antisense RNA 1	ncRNA
5330	chr11	799038	800219	+	9	NA	intron (NM_145886, intron 15 of 15)	intron (NM_145886, intron 15 of 15)	-1347	NM_001191061	79751		NM_024698	ENSG00000177542	SLC25A22	DEE3|EIEE3|GC-1|GC1|NET44	solute carrier family 25 member 22	protein-coding
5390-2	chr19	46745260	46746247	+	9	NA	promoter-TSS (NM_024301)	promoter-TSS (NM_024301)	-304	NM_001039885	79147		NM_024301	ENSG00000181027	FKRP	FKTR|LGMD2I|LGMDR9|MDC1C|MDDGA5|MDDGB5|MDDGC5	fukutin related protein	protein-coding
6080-2	chr14	100850765	100852522	+	9	NA	promoter-TSS (NR_030528)	promoter-TSS (NR_030528)	-747	NR_030528	768222		NR_030528	ENSG00000211574	MIR770	MIRN770|hsa-mir-770	microRNA 770	ncRNA
9284-2	chr20	51737814	51740091	+	9	NA	intron (NM_006045, intron 1 of 27)	AluSx1|SINE|Alu	29438	NM_006045	10079		NM_006045	ENSG00000054793	ATP9A	ATPIIA|NEDGBA	ATPase phospholipid transporting 9A (putative)	protein-coding
6021	chr9	128633019	128633405	+	9	NA	TTS (NM_052844)	TTS (NM_052844)	23638	NM_052844	89891		NM_052844	ENSG00000119333	DYNC2I2	CFAP133|DIC5|FAP133|SRTD11|WDR34|bA216B9.3	dynein 2 intermediate chain 2	protein-coding
8993	chr14	64736138	64737818	+	9	NA	intron (NM_001308147, intron 13 of 16)	intron (NM_001308147, intron 13 of 16)	32554	NM_001308147	26030		NM_015549	ENSG00000126822	PLEKHG3	ARHGEF43|KIAA0599	pleckstrin homology and RhoGEF domain containing G3	protein-coding
5359	chr2	127069293	127070244	+	9	NA	intron (NM_139345, intron 5 of 15)	intron (NM_139345, intron 5 of 15)	12297	NM_001320634	274		NM_004305	ENSG00000136717	BIN1	AMPH2|AMPHL|CNM2|SH3P9	bridging integrator 1	protein-coding
6173	chr19	3531857	3532937	+	9	NA	intron (NM_001136198, intron 9 of 12)	intron (NM_001136198, intron 9 of 12)	-6760	NM_001135580	100128569		NM_001135580	ENSG00000183397	TEKTIP1	C19orf71	tektin bundle interacting protein 1	protein-coding
6800	chr11	65389423	65391455	+	9	NA	intron (NM_001300833, intron 3 of 9)	intron (NM_001300833, intron 3 of 9)	3802	NM_001300833	83786		NM_031904	ENSG00000126391	FRMD8	FKSG44|iTAP	FERM domain containing 8	protein-coding
6878	chr6	33743997	33745825	+	9	NA	intron (NM_001142883, intron 1 of 6)	intron (NM_001142883, intron 1 of 6)	1994	NM_054111	117283		NM_054111	ENSG00000161896	IP6K3	IHPK3|INSP6K3	inositol hexakisphosphate kinase 3	protein-coding
6295	chr13	113436409	113437941	+	9	NA	intron (NM_138430, intron 2 of 6)	intron (NM_138430, intron 2 of 6)	11983	NM_199162	113622		NM_138430	ENSG00000153531	ADPRHL1	ARH2	ADP-ribosylhydrolase like 1	protein-coding
6161	chr10	113044115	113045476	+	9	NA	promoter-TSS (NR_132769)	promoter-TSS (NR_132769)	-560	NR_132769	106635520		NR_132769		SNORA87	-	small nucleolar RNA, H/ACA box 87	snoRNA
5658	chr6_GL000254v2_alt	4270150	4271491	+	9	NA	5' UTR (NM_001291986, exon 2 of 11)	5' UTR (NM_001291986, exon 2 of 11)	168	NM_001199455	6046		NM_005104	ENSG00000204256	BRD2	BRD2-IT1|D6S113E|FSH|FSHRG1|FSRG1|NAT|O27.1.1|RING3|RNF3	bromodomain containing 2	protein-coding
5728	chr1	938167	938925	+	9	NA	intron (NM_001385641, intron 5 of 13)	intron (NM_001385641, intron 5 of 13)	12815	NM_152486	148398		NM_152486	ENSG00000187634	SAMD11	MRS	sterile alpha motif domain containing 11	protein-coding
8577	chr5_GL339449v2_alt	653479	656265	+	9	NA	non-coding (NR_157804, exon 1 of 1)	non-coding (NR_157804, exon 1 of 1)	233	NR_160659	101929599		NR_157804		LOC101929599	-	putative POM121-like protein 1-like pseudogene	pseudo
6265	chr20	46799131	46800656	+	9	NA	Intergenic	Intergenic	90244	NM_030777	81031		NM_030777	ENSG00000197496	SLC2A10	ATORS|ATS|GLUT10	solute carrier family 2 member 10	protein-coding
6066	chr19	49338140	49339813	+	9	NA	intron (NM_001774, intron 6 of 7)	CpG	3570	NM_001774	951		NM_001774	ENSG00000104894	CD37	GP52-40|TSPAN26	CD37 molecule	protein-coding
5663	chr6	150273557	150274534	+	9	NA	Intergenic	Intergenic	-94967	NR_134655	389434		NM_203395	ENSG00000009765	IYD	C6orf71|DEHAL1|IYD-1|TDH4	iodotyrosine deiodinase	protein-coding
6154	chr3	50423099	50423945	+	9	NA	intron (NM_006030, intron 3 of 37)	intron (NM_006030, intron 3 of 37)	58159	NR_111914	101928965		NR_111913	ENSG00000271858	LOC101928965	-	uncharacterized LOC101928965	ncRNA
6444	chr20	63951096	63951691	+	9	NA	promoter-TSS (NM_001353478)	promoter-TSS (NM_001353478)	-206	NM_001353478	54963		NM_017859	ENSG00000198276	UCKL1	UCK1L|URKL1	uridine-cytidine kinase 1 like 1	protein-coding
5300	chr6	125952780	125953791	+	9	NA	Intergenic	LTR2752|LTR|ERV1	-3485	NM_138571	135114		NM_138571	ENSG00000111911	HINT3	HINT4	histidine triad nucleotide binding protein 3	protein-coding
5549	chr17	1965738	1967357	+	9	NA	intron (NM_178568, intron 1 of 1)	intron (NM_178568, intron 1 of 1)	-51169	NR_135642	105371485		NR_135642	ENSG00000228133	LOC105371485	-	uncharacterized LOC105371485	ncRNA
6066-2	chr19	49340063	49340120	+	9	NA	TTS (NM_001256662)	TTS (NM_001256662)	4685	NM_001774	951		NM_001774	ENSG00000104894	CD37	GP52-40|TSPAN26	CD37 molecule	protein-coding
5286	chr16	50309334	50310893	+	9	NA	intron (NM_001114, intron 18 of 25)	intron (NM_001114, intron 18 of 25)	17497	NR_106829	102465462		NR_106829	ENSG00000274969	MIR6771	hsa-mir-6771	microRNA 6771	ncRNA
5945	chr8	30439919	30442246	+	9	NA	intron (NM_006867, intron 1 of 9)	AluJo|SINE|Alu	-55681	NR_046205	100128750		NR_046205	ENSG00000254109	RBPMS-AS1	TP53LC06	RBPMS antisense RNA 1	ncRNA
8560	chr11	46375713	46377431	+	9	NA	TTS (NR_039837)	TTS (NR_039837)	170	NR_039837	100616368		NR_039837	ENSG00000264102	MIR4688	mir-4688	microRNA 4688	ncRNA
10034-2	chr9	95091191	95093211	+	9	NA	Intergenic	Intergenic	-6107	NR_036109	100422842		NR_036109	ENSG00000207617	MIR3074	mir-3074	microRNA 3074	ncRNA
6949	chr17	16297196	16298768	+	9	NA	intron (NM_004278, intron 2 of 6)	MER1B|DNA|hAT-Charlie	15968	NR_031698	100302124		NR_031698	ENSG00000221355	MIR1288	MIRN1288|hsa-mir-1288	microRNA 1288	ncRNA
5271	chr5	75050608	75051741	+	8	NA	intron (NM_001366737, intron 2 of 3)	intron (NM_001366737, intron 2 of 3)	1384	NM_001366737	51301		NM_016591	ENSG00000176928	GCNT4	C2GNT3|LINC01336	glucosaminyl (N-acetyl) transferase 4	protein-coding
5533	chr1	1160379	1161953	+	8	NA	Intergenic	Intergenic	-5938	NR_029639	406984		NR_029639	ENSG00000207730	MIR200B	MIRN200B|mir-200b	microRNA 200b	ncRNA
5314	chr4	38177409	38178808	+	8	NA	Intergenic	L2c|LINE|L2	58154	NM_001253915	23216		NM_015173	ENSG00000065882	TBC1D1	TBC|TBC1	TBC1 domain family member 1	protein-coding
5570-3	chr3	49013158	49014314	+	8	NA	exon (NM_018031, exon 2 of 6)	exon (NM_018031, exon 2 of 6)	4844	NM_001009996	55152		NM_018114	ENSG00000178149	DALRD3	DEE86|EIEE86	DALR anticodon binding domain containing 3	protein-coding
5250	chr19	57810202	57811469	+	8	NA	intron (NM_024762, intron 2 of 2)	LTR5_Hs|LTR|ERVK	4078	NM_024762	79818		NM_024762	ENSG00000178935	ZNF552	-	zinc finger protein 552	protein-coding
5302	chr22	37638040	37639591	+	8	NA	promoter-TSS (NM_001350055)	promoter-TSS (NM_001350055)	-854	NM_001350055	23616		NM_018957	ENSG00000100092	SH3BP1	ARHGAP43	SH3 domain binding protein 1	protein-coding
7221	chr19	18514574	18515682	+	8	NA	intron (NM_006532, intron 1 of 11)	intron (NM_006532, intron 1 of 11)	6942	NM_006532	8178		NM_006532	ENSG00000105656	ELL	C19orf17|ELL1|MEN|PPP1R68	elongation factor for RNA polymerase II	protein-coding
6797	chr2	127100477	127102130	+	8	NA	intron (NM_139345, intron 1 of 15)	intron (NM_139345, intron 1 of 15)	5851	NM_139349	274		NM_004305	ENSG00000136717	BIN1	AMPH2|AMPHL|CNM2|SH3P9	bridging integrator 1	protein-coding
5502-2	chr14	100348079	100349660	+	8	NA	intron (NM_173701, intron 6 of 10)	intron (NM_173701, intron 6 of 10)	25530	NM_001350877	283600		NM_207117	ENSG00000140107	SLC25A47	C14orf68|HDCMP|HDMCP|HMFN1655	solute carrier family 25 member 47	protein-coding
7109	chr2	142130008	142131484	+	8	NA	5' UTR (NM_018557, exon 1 of 91)	5' UTR (NM_018557, exon 1 of 91)	270	NM_018557	53353		NM_018557	ENSG00000168702	LRP1B	LRP-1B|LRP-DIT|LRPDIT	LDL receptor related protein 1B	protein-coding
5622	chr17	43905246	43906784	+	8	NA	intron (NM_001278370, intron 1 of 12)	intron (NM_001278370, intron 1 of 12)	1521	NM_005374	4355		NM_005374	ENSG00000108852	MPP2	DLG2	MAGUK p55 scaffold protein 2	protein-coding
5868	chr9	136571343	136572814	+	8	NA	Intergenic	MER91C|DNA|hAT-Tip100	24236	NR_121577	101928483		NR_121577		NALT1	LINC01573|MIR4674HG|NALT|TCONS_l2_00029132	NOTCH1 associated lncRNA in T cell acute lymphoblastic leukemia 1	ncRNA
7664	chr16	83949334	83951155	+	8	NA	Intergenic	Intergenic	-2996	NM_182981	29948		NM_013370	ENSG00000140961	OSGIN1	BDGI|OKL38	oxidative stress induced growth inhibitor 1	protein-coding
6975	chr8	22024474	22026213	+	8	NA	intron (NM_182795, intron 2 of 8)	CpG-27050	500	NM_182795	10361		NM_182795	ENSG00000158806	NPM2	-	nucleophosmin/nucleoplasmin 2	protein-coding
7979	chr17	38873691	38875779	+	8	NA	intron (NM_006148, intron 1 of 6)	intron (NM_006148, intron 1 of 6)	4677	NM_006148	3927		NM_006148	ENSG00000002834	LASP1	Lasp-1|MLN50	LIM and SH3 protein 1	protein-coding
5324-3	chr9	89859242	89860881	+	8	NA	Intergenic	Intergenic	-109355	NR_109791	101927847		NR_109791		LOC101927847	-	uncharacterized LOC101927847	ncRNA
5838-2	chr8	20295035	20297207	+	8	NA	intron (NM_021020, intron 1 of 3)	intron (NM_021020, intron 1 of 3)	7842	NM_021020	11178		NM_021020	ENSG00000061337	LZTS1	F37|FEZ1	leucine zipper tumor suppressor 1	protein-coding
5206-2	chr22	39522738	39523826	+	8	NA	TTS (NM_001675)	TTS (NM_001675)	2718	NM_182810	468		NM_001675	ENSG00000128272	ATF4	CREB-2|CREB2|TAXREB67|TXREB	activating transcription factor 4	protein-coding
5798	chr5	90766	92049	+	8	NA	promoter-TSS (NM_052909)	promoter-TSS (NM_052909)	-761	NM_052909	153478		NM_052909	ENSG00000153404	PLEKHG4B	ARHGEF48	pleckstrin homology and RhoGEF domain containing G4B	protein-coding
5667	chr14	68921713	68923580	+	8	NA	intron (NM_001130004, intron 2 of 21)	intron (NM_001130004, intron 2 of 21)	56656	NM_001130005	87		NM_001102	ENSG00000072110	ACTN1	BDPLT15	actinin alpha 1	protein-coding
5311	chr2	215274360	215275419	+	8	NA	Intergenic	Intergenic	-37170	NM_004044	471		NM_004044	ENSG00000138363	ATIC	AICAR|AICARFT|HEL-S-70p|IMPCHASE|PURH	5-aminoimidazole-4-carboxamide ribonucleotide formyltransferase/IMP cyclohydrolase	protein-coding
5646	chr20	51712566	51714225	+	8	NA	intron (NM_006045, intron 3 of 27)	intron (NM_006045, intron 3 of 27)	54995	NM_006045	10079		NM_006045	ENSG00000054793	ATP9A	ATPIIA|NEDGBA	ATPase phospholipid transporting 9A (putative)	protein-coding
5872-2	chr9	131606127	131607563	+	7	NA	intron (NM_001377935, intron 12 of 26)	AluJo|SINE|Alu	44558	NM_001377936	2889		NM_005312	ENSG00000107263	RAPGEF1	C3G|GRF2	Rap guanine nucleotide exchange factor 1	protein-coding
5644	chr11	15900935	15902579	+	7	NA	Intergenic	Intergenic	67864	NR_106721	102464826		NR_106721	ENSG00000284094	MIR6073	hsa-mir-6073	microRNA 6073	ncRNA
5259	chr9	137028472	137029736	+	7	NA	promoter-TSS (NM_001606)	promoter-TSS (NM_001606)	-182	NM_212533	20		NM_001606	ENSG00000107331	ABCA2	ABC2|IDPOGSA	ATP binding cassette subfamily A member 2	protein-coding
5343	chr5	98769505	98770914	+	7	NA	non-coding (NR_033932, exon 2 of 2)	non-coding (NR_033932, exon 2 of 2)	773	NM_001366511	285704		NM_173670	ENSG00000174136	RGMB	DRAGON	repulsive guidance molecule BMP co-receptor b	protein-coding
5492	chr1	3060934	3062744	+	7	NA	non-coding (NR_015440, exon 3 of 6)	non-coding (NR_015440, exon 3 of 6)	5886	NR_015440	440556		NM_198543	ENSG00000177133	PRDM16-DT	LINC00982|lnc-dPrdm16	PRDM16 divergent transcript	ncRNA
5589	chr5	21481430	21483396	+	7	NA	intron (NR_027026, intron 3 of 4)	intron (NR_027026, intron 3 of 4)	22933	NR_027027	728411		NM_207331	ENSG00000291102	GUSBP1	-	GUSB pseudogene 1	pseudo
5524	chr9	64650370	64651900	+	7	NA	non-coding (NR_160671, exon 5 of 5)	non-coding (NR_160671, exon 5 of 5)	11401	NR_136299	101929583		NR_136299		LOC101929583	-	methylenetetrahydrofolate dehydrogenase (NADP+ dependent) 1 like pseudogene	pseudo
5386	chr1	3492064	3493281	+	7	NA	exon (NM_001409, exon 35 of 37)	exon (NM_001409, exon 35 of 37)	38007	NM_014448	27237		NM_014448	ENSG00000130762	ARHGEF16	GEF16|NBR	Rho guanine nucleotide exchange factor 16	protein-coding
5875	chr1	21334576	21336211	+	7	NA	intron (NM_001113348, intron 1 of 18)	intron (NM_001113348, intron 1 of 18)	10111	NM_001113348	1889		NM_001397	ENSG00000117298	ECE1	ECE	endothelin converting enzyme 1	protein-coding
5474	chr11_KI270721v1_random	2606	3946	+	7	NA	intron (NM_021134, intron 1 of 4).2	intron (NM_021134, intron 1 of 4).2	631	NM_021134	6150		NM_021134	ENSG00000214026	MRPL23	L23MRP|RPL23|RPL23L|uL23m	mitochondrial ribosomal protein L23	protein-coding
5668	chr16	85651271	85653206	+	7	NA	intron (NM_001278184, intron 2 of 14)	intron (NM_001278184, intron 2 of 14)	36716	NM_016095	51659		NM_016095	ENSG00000131153	GINS2	HSPC037|PSF2|Pfs2	GINS complex subunit 2	protein-coding
6164-2	chr20	17613991	17614695	+	7	NA	intron (NM_004587, intron 24 of 24)	intron (NM_004587, intron 24 of 24)	44268	NM_006870	11034		NM_006870	ENSG00000125868	DSTN	ACTDP|ADF|HEL32|bA462D18.2	destrin, actin depolymerizing factor	protein-coding
5710	chr5_KI270897v1_alt	124809	126808	+	7	NA	non-coding (NR_157804, exon 1 of 1).6	non-coding (NR_157804, exon 1 of 1).6	776	NR_160659	101929599		NR_157804		LOC101929599	-	putative POM121-like protein 1-like pseudogene	pseudo
5327	chr17	2962693	2964224	+	7	NA	exon (NM_015085, exon 6 of 25)	exon (NM_015085, exon 6 of 25)	2437	NR_110818	101927911		NR_110818	ENSG00000262884	LOC101927911	-	uncharacterized LOC101927911	ncRNA
6539-3	chr5_KI270897v1_alt	104317	106544	+	7	NA	non-coding (NR_073404, exon 1 of 1).2	non-coding (NR_073404, exon 1 of 1).2	719	NR_160659	101929599		NR_157804		LOC101929599	-	putative POM121-like protein 1-like pseudogene	pseudo
5383	chr8	37703273	37704773	+	7	NA	Intergenic	Intergenic	8241	NM_025069	80139		NM_025069	ENSG00000183779	ZNF703	NLZ1|ZEPPO1|ZNF503L|ZPO1	zinc finger protein 703	protein-coding
5277	chr2	127105215	127105773	+	7	NA	intron (NM_139345, intron 1 of 15)	(CCT)n|Simple_repeat|Simple_repeat	1660	NM_139349	274		NM_004305	ENSG00000136717	BIN1	AMPH2|AMPHL|CNM2|SH3P9	bridging integrator 1	protein-coding
5215	chr3	129310486	129312337	+	6	NA	Intergenic	Intergenic	-4860	NR_026991	339942		NM_001025468		H1-10-AS1	C3orf47|H1FX-AS1	H1-10 antisense RNA 1	ncRNA
6319	chr12	132148925	132150848	+	6	NA	intron (NM_024078, intron 9 of 14)	CpG-6292	5429	NM_024078	79050		NM_024078	ENSG00000184967	NOC4L	NET49|NOC4|UTP19	nucleolar complex associated 4 homolog	protein-coding
5434-2	chr5	69633317	69635171	+	6	NA	non-coding (NR_157804, exon 1 of 2).3	non-coding (NR_157804, exon 1 of 2).3	3099	NR_157804	101929599		NR_157804		LOC101929599	-	putative POM121-like protein 1-like pseudogene	pseudo
5659-3	chr3	48596564	48598322	+	6	NA	Intergenic	Intergenic	-2114	NM_000094	1294		NM_000094	ENSG00000114270	COL7A1	EBD1|EBDCT|EBR1|NDNC8	collagen type VII alpha 1 chain	protein-coding
5936	chr2	216664629	216666118	+	6	NA	TTS (NM_000597)	TTS (NM_000597)	5806	NM_001313990	3485		NM_000597	ENSG00000115457	IGFBP2	IBP2|IGF-BP53	insulin like growth factor binding protein 2	protein-coding
5764-2	chr9	63047066	63049422	+	5	NA	Intergenic	G-rich|Low_complexity|Low_complexity	30249	NR_121570	101928381		NR_121570		LOC101928381	-	uncharacterized LOC101928381	ncRNA
5653	chr9	65818948	65821085	+	5	NA	Intergenic	G-rich|Low_complexity|Low_complexity	28895	NR_121570	101928381		NR_121570		LOC101928381	-	uncharacterized LOC101928381	ncRNA
