# Supplementary material for: Epigenetic control of PDX1 and NGN3 by a computationally designed PRC2 inhibitor enforces pancreatic endocrine differentiation from pluripotent stem cells
Source: Research Square preprint supplement (doi:10.21203/rs.3.rs-9115136/v1), 2026-03-26
Supplement: Supplementary file 9 [file f78350e7b98bbbe5a2e74d56.xlsx]

## Sheet: Sheet1
Table S8. GSEA of Protein coding genes concordantly regulated in H1 and MEL1 Double hESC treated with NGN3-guided EBdCas9 vs EBdCas9 only.
ID	Description	setSize	enrichmentScore	NES	pvalue	p.adjust	qvalue	rank	leading_edge	core_enrichment
REACTOME_NEURONAL_SYSTEM	REACTOME_NEURONAL_SYSTEM	201	0.625156	1.66083	1.77825e-08	1.62177e-05	1.53678e-05	1528	tags=46%, list=19%, signal=38%	CHRNB4/KCNQ5/GABRA4/CHRNA2/KCNG2/KCNV1/KCNJ5/CHRNA3/CAMK2B/CHRNB2/KCNN1/SNAP25/ABCC8/GRIA1/NRXN2/SYN1/CACNG8/KCNH6/GAD2/CACNA1A/KCNB2/PRKCG/GABRB2/CAMK1/KCNK16/KCNC1/KCNJ11/DLG4/TSPOAP1/CACNA1B/GABBR2/GRIK5/GLS2/GRIA4/KCNAB3/KCNJ6/KCNA3/KCNN3/NEFL/GABRA5/GRIK3/IL1RAPL1/SLC6A4/GRIA2/PPM1E/KCNK9/NTRK3/ADCY2/ADCY1/KCNK17/CACNA2D2/KCNC4/CACNB2/PPFIA3/SYT2/KCNG3/KCNH7/CACNB1/GLRB/NRXN3/KIF17/LRFN1/GRI…
REACTOME_REGULATION_OF_BETA_CELL_DEVELOPMENT	REACTOME_REGULATION_OF_BETA_CELL_DEVELOPMENT	24	0.864233	1.98172	2.81882e-07	0.000128538	0.000121803	459	tags=54%, list=6%, signal=51%	PAX4/ONECUT3/PAX6/NKX6-1/ONECUT1/INS/IAPP/NEUROG3/INSM1/GCK/PDX1/KAT2B/NKX2-2
REACTOME_SIGNALING_BY_GPCR	REACTOME_SIGNALING_BY_GPCR	247	0.573246	1.53302	2.80314e-06	0.000852154	0.000807501	1209	tags=33%, list=15%, signal=29%	HTR1A/RXFP4/GHRL/TACR1/GPHA2/PPY/WNT7B/FFAR1/TSHR/PDE1B/GRM3/DGKB/SSTR3/CXCL12/CAMK2B/CX3CL1/PLPPR5/SSTR2/IAPP/CXCL6/FFAR2/GPR83/PRKCG/PDE10A/TRPC7/TIAM1/RAMP3/GAST/GIPR/GIP/PYY/CASR/SCT/GPR68/PTCH2/GABBR2/CXCL1/RGS5/TAS2R5/SSTR1/SST/PTGDR2/PDE2A/UCN3/SSTR5/GNAZ/NTS/ADRA1D/CXCL8/CCKBR/GRPR/ADORA2A/PTGER3/ADCY2/RASGRP1/ADCY1/GPR20/RGS9/ARHGEF25/IHH/NPFFR2/GPSM3/WNT9A/RGS2/ADRA2C/NBEA/GABBR1/GNG11/…
REACTOME_POTASSIUM_CHANNELS	REACTOME_POTASSIUM_CHANNELS	45	0.7519	1.84557	5.25693e-06	0.00119858	0.00113577	1117	tags=62%, list=14%, signal=54%	KCNQ5/KCNG2/KCNV1/KCNJ5/KCNN1/ABCC8/KCNH6/KCNB2/KCNK16/KCNC1/KCNJ11/GABBR2/KCNAB3/KCNJ6/KCNA3/KCNN3/KCNK9/KCNK17/KCNC4/KCNG3/KCNH7/GABBR1/GNG11/GNG4/HCN4/KCNMB4/KCNJ14/KCNJ2
REACTOME_TRANSMISSION_ACROSS_CHEMICAL_SYNAPSES	REACTOME_TRANSMISSION_ACROSS_CHEMICAL_SYNAPSES	133	0.614538	1.61243	1.2586e-05	0.00229568	0.00217538	1528	tags=44%, list=19%, signal=36%	CHRNB4/GABRA4/CHRNA2/KCNJ5/CHRNA3/CAMK2B/CHRNB2/SNAP25/GRIA1/SYN1/CACNG8/GAD2/CACNA1A/PRKCG/GABRB2/CAMK1/DLG4/TSPOAP1/CACNA1B/GABBR2/GRIK5/GLS2/GRIA4/KCNJ6/NEFL/GABRA5/GRIK3/SLC6A4/GRIA2/PPM1E/ADCY2/ADCY1/CACNA2D2/CACNB2/PPFIA3/CACNB1/GLRB/KIF17/GRIK2/NBEA/GABBR1/GNG11/GNG4/KCNJ2/SYN2/RAB3A/MAPT/RASGRF2/ADCY3/BCHE/STXBP1/GABRB3/ADCY7/ADCY8/GRIA3/GNG2/GRIP2/STX1A
REACTOME_GPCR_LIGAND_BINDING	REACTOME_GPCR_LIGAND_BINDING	125	0.620534	1.62728	2.19046e-05	0.0033295	0.00315503	1160	tags=43%, list=14%, signal=38%	HTR1A/RXFP4/GHRL/TACR1/GPHA2/PPY/WNT7B/FFAR1/TSHR/GRM3/SSTR3/CXCL12/CX3CL1/PLPPR5/SSTR2/IAPP/CXCL6/FFAR2/RAMP3/GIPR/GIP/PYY/CASR/SCT/GPR68/PTCH2/GABBR2/CXCL1/TAS2R5/SSTR1/SST/PTGDR2/UCN3/SSTR5/NTS/ADRA1D/CXCL8/CCKBR/GRPR/ADORA2A/PTGER3/IHH/NPFFR2/WNT9A/ADRA2C/GABBR1/GNG11/ADRA1B/GNG4/GLP1R/PTHLH/OXT/GCGR/PENK
REACTOME_TELOMERE_EXTENSION_BY_TELOMERASE	REACTOME_TELOMERE_EXTENSION_BY_TELOMERASE	14	0.863523	1.82097	5.13606e-05	0.00669156	0.00634091	335	tags=29%, list=4%, signal=27%	TERT/PIF1/RTEL1/CCNA1
REACTOME_NEUROTRANSMITTER_RECEPTORS_AND_POSTSYNAPTIC_SIGNAL_TRANSMISSION	REACTOME_NEUROTRANSMITTER_RECEPTORS_AND_POSTSYNAPTIC_SIGNAL_TRANSMISSION	98	0.631906	1.6426	7.43195e-05	0.00847243	0.00802847	1525	tags=42%, list=19%, signal=34%	CHRNB4/GABRA4/CHRNA2/KCNJ5/CHRNA3/CAMK2B/CHRNB2/GRIA1/CACNG8/PRKCG/GABRB2/CAMK1/DLG4/GABBR2/GRIK5/GRIA4/KCNJ6/NEFL/GABRA5/GRIK3/GRIA2/PPM1E/ADCY2/ADCY1/GLRB/KIF17/GRIK2/NBEA/GABBR1/GNG11/GNG4/KCNJ2/MAPT/RASGRF2/ADCY3/GABRB3/ADCY7/ADCY8/GRIA3/GNG2/GRIP2
REACTOME_CARDIAC_CONDUCTION	REACTOME_CARDIAC_CONDUCTION	66	0.664748	1.68071	9.38044e-05	0.00950551	0.00900741	1365	tags=50%, list=17%, signal=42%	CACNG7/CACNG6/CAMK2B/FXYD6/PLN/CACNG8/ATP2A3/KCNK16/RYR2/KCNJ11/SCN5A/SLC8A3/ATP2B2/KAT2B/CACNA1C/FGF14/KCNE4/KCNK12/KCNK9/KCNK17/CACNA2D2/CACNB2/SCN3A/CACNB1/SCN3B/MME/SCN9A/KCNJ14/KCNJ2/KCND3/SCN1B/ITPR1/RYR1
REACTOME_C_TYPE_LECTIN_RECEPTORS_CLRS	REACTOME_C_TYPE_LECTIN_RECEPTORS_CLRS	71	-0.46593	-1.85903	0.00017015	0.0150412	0.0142531	1343	tags=30%, list=17%, signal=25%	PSMA1/PSMC6/PSMB2/PSMA4/NFATC1/SKP1/PSMA3/CASP8/BCL10/UBE2D1/MUC20/RPS6KA5/MUC3A/PSMB8/MUC1/PSMA2/PSMA6/MUC15/MUC16/MUC13/MUC17
REACTOME_INTEGRATION_OF_ENERGY_METABOLISM	REACTOME_INTEGRATION_OF_ENERGY_METABOLISM	56	0.676348	1.69303	0.000197716	0.0150412	0.0142531	1528	tags=50%, list=19%, signal=41%	FFAR1/KCNG2/SNAP25/ABCC8/INS/CACNA1A/KCNJ11/CACNA1C/SYT5/ADCY2/ADCY1/CACNA2D2/CACNB2/ADRA2C/GNG11/GNG4/GLP1R/RAPGEF4/GCGR/ADCY3/ITPR1/SLC2A1/STXBP1/ADCY7/ADCY8/GNG2/KCNB1/STX1A
REACTOME_CLASS_A_1_RHODOPSIN_LIKE_RECEPTORS	REACTOME_CLASS_A_1_RHODOPSIN_LIKE_RECEPTORS	85	0.632849	1.62395	0.000197911	0.0150412	0.0142531	745	tags=34%, list=9%, signal=31%	HTR1A/RXFP4/GHRL/TACR1/GPHA2/PPY/FFAR1/TSHR/SSTR3/CXCL12/CX3CL1/PLPPR5/SSTR2/CXCL6/FFAR2/PYY/GPR68/CXCL1/SSTR1/SST/PTGDR2/SSTR5/NTS/ADRA1D/CXCL8/CCKBR/GRPR/ADORA2A/PTGER3
REACTOME_DECTIN_2_FAMILY	REACTOME_DECTIN_2_FAMILY	10	-0.843229	-2.15531	0.000265016	0.0180655	0.0171188	552	tags=70%, list=7%, signal=65%	MUC20/MUC3A/MUC1/MUC15/MUC16/MUC13/MUC17
REACTOME_REGULATION_OF_GENE_EXPRESSION_IN_BETA_CELLS	REACTOME_REGULATION_OF_GENE_EXPRESSION_IN_BETA_CELLS	10	0.88863	1.75936	0.000277321	0.0180655	0.0171188	459	tags=70%, list=6%, signal=66%	PAX6/NKX6-1/INS/IAPP/GCK/PDX1/NKX2-2
REACTOME_REGULATION_OF_INSULIN_SECRETION	REACTOME_REGULATION_OF_INSULIN_SECRETION	45	0.688926	1.691	0.000376028	0.0228625	0.0216645	1528	tags=51%, list=19%, signal=42%	FFAR1/KCNG2/SNAP25/ABCC8/INS/CACNA1A/KCNJ11/CACNA1C/SYT5/CACNA2D2/CACNB2/ADRA2C/GNG11/GNG4/GLP1R/RAPGEF4/ITPR1/SLC2A1/STXBP1/ADCY8/GNG2/KCNB1/STX1A
REACTOME_PHASE_0_RAPID_DEPOLARISATION	REACTOME_PHASE_0_RAPID_DEPOLARISATION	22	0.76721	1.73626	0.000585769	0.0333888	0.0316392	1012	tags=59%, list=13%, signal=52%	CACNG7/CACNG6/CAMK2B/CACNG8/SCN5A/CACNA1C/FGF14/CACNA2D2/CACNB2/SCN3A/CACNB1/SCN3B/SCN9A
REACTOME_DEFECTIVE_CFTR_CAUSES_CYSTIC_FIBROSIS	REACTOME_DEFECTIVE_CFTR_CAUSES_CYSTIC_FIBROSIS	30	-0.592961	-1.95567	0.000849348	0.045565	0.0431774	2070	tags=53%, list=26%, signal=40%	PSMD5/ERLIN1/PSMA5/SEL1L/PSMD12/DERL1/PSMA1/PSMC6/PSMB2/PSMA4/PSMA3/CFTR/PSMB8/PSMA2/PSMA6/DERL3
REACTOME_NETRIN_1_SIGNALING	REACTOME_NETRIN_1_SIGNALING	26	0.742106	1.71638	0.000945319	0.0478962	0.0453864	738	tags=35%, list=9%, signal=32%	TRPC4/SLIT1/TRPC7/DCC/UNC5D/UNC5A/AGAP2/SLIT2/ABLIM2
REACTOME_IRAK4_DEFICIENCY_TLR2_4	REACTOME_IRAK4_DEFICIENCY_TLR2_4	10	-0.80984	-2.06997	0.00114503	0.0549615	0.0520815	609	tags=60%, list=8%, signal=56%	FGG/FGA/FGB/TLR2/S100A1/TLR6
REACTOME_DRUG_ADME	REACTOME_DRUG_ADME	44	-0.498124	-1.72814	0.00135949	0.0619926	0.0587441	1181	tags=43%, list=15%, signal=37%	GSTA1/NME2/GLYATL1/GSTA2/ABCC4/TPMT/UGT2B11/GGT1/UGT3A2/SERPINA6/ALB/CYP2D6/UGT2B28/SLC22A1/ABCB1/NAT2/SLC28A3/UGT2B4/UGT2B10
REACTOME_INCRETIN_SYNTHESIS_SECRETION_AND_INACTIVATION	REACTOME_INCRETIN_SYNTHESIS_SECRETION_AND_INACTIVATION	12	0.837826	1.70654	0.00156746	0.0680727	0.0645056	378	tags=42%, list=5%, signal=40%	FFAR1/PAX6/ISL1/PCSK1/GIP
REACTOME_GABA_RECEPTOR_ACTIVATION	REACTOME_GABA_RECEPTOR_ACTIVATION	25	0.731861	1.68552	0.00185752	0.0770026	0.0729676	1510	tags=68%, list=19%, signal=55%	GABRA4/KCNJ5/GABRB2/GABBR2/KCNJ6/GABRA5/ADCY2/ADCY1/GABBR1/GNG11/GNG4/KCNJ2/ADCY3/GABRB3/ADCY7/ADCY8/GNG2
REACTOME_ANTIGEN_PROCESSING_CROSS_PRESENTATION	REACTOME_ANTIGEN_PROCESSING_CROSS_PRESENTATION	47	-0.502193	-1.79363	0.00200161	0.0770989	0.0730589	1736	tags=49%, list=22%, signal=39%	PSMA5/CHUK/PSMD12/VAMP8/PSMA1/PSMC6/PSMB2/PSMA4/PSMA3/HLA-B/FGG/PDIA3/FGA/HLA-F/FGB/B2M/PSMB8/PSMA2/PSMA6/CTSS/TLR2/S100A1/TLR6
REACTOME_VOLTAGE_GATED_POTASSIUM_CHANNELS	REACTOME_VOLTAGE_GATED_POTASSIUM_CHANNELS	19	0.774004	1.70829	0.00202892	0.0770989	0.0730589	939	tags=58%, list=12%, signal=51%	KCNQ5/KCNG2/KCNV1/KCNH6/KCNB2/KCNC1/KCNAB3/KCNA3/KCNC4/KCNG3/KCNH7
REACTOME_ION_HOMEOSTASIS	REACTOME_ION_HOMEOSTASIS	26	0.725835	1.67874	0.00215472	0.0786041	0.0744852	419	tags=31%, list=5%, signal=29%	CAMK2B/FXYD6/PLN/ATP2A3/RYR2/KCNJ11/SLC8A3/ATP2B2
REACTOME_INWARDLY_RECTIFYING_K_CHANNELS	REACTOME_INWARDLY_RECTIFYING_K_CHANNELS	14	0.79279	1.67181	0.00283293	0.09569	0.0906758	1519	tags=86%, list=19%, signal=70%	KCNJ5/ABCC8/KCNJ11/GABBR2/KCNJ6/GABBR1/GNG11/GNG4/KCNJ14/KCNJ2/GNG2/ABCC9
REACTOME_MUSCLE_CONTRACTION	REACTOME_MUSCLE_CONTRACTION	96	0.569184	1.4773	0.00274826	0.09569	0.0906758	1378	tags=39%, list=17%, signal=32%	CACNG7/CACNG6/CAMK2B/FXYD6/ACTN3/PLN/CACNG8/ATP2A3/KCNK16/RYR2/KCNJ11/SCN5A/SLC8A3/ATP2B2/KAT2B/CACNA1C/FGF14/KCNE4/KCNK12/KCNK9/KCNK17/CACNA2D2/CACNB2/SCN3A/CACNB1/SCN3B/MME/SCN9A/KCNJ14/TMOD2/KCNJ2/KCND3/SCN1B/ITPR1/MYL6B/RYR1/MYL7
REACTOME_TERMINATION_OF_O_GLYCAN_BIOSYNTHESIS	REACTOME_TERMINATION_OF_O_GLYCAN_BIOSYNTHESIS	10	-0.775986	-1.98343	0.00338655	0.106501	0.10092	552	tags=70%, list=7%, signal=65%	MUC20/MUC3A/MUC1/MUC15/MUC16/MUC13/MUC17
REACTOME_NERVOUS_SYSTEM_DEVELOPMENT	REACTOME_NERVOUS_SYSTEM_DEVELOPMENT	297	0.488664	1.30769	0.00327434	0.106501	0.10092	1324	tags=20%, list=16%, signal=17%	LHX4/TRPC4/LHX3/RELN/COL9A1/MMP2/DPYSL5/DCX/CXCL12/GFRA1/NCAM1/GFRA3/SLIT1/KIF4A/GAP43/ISL1/TRPC7/TIAM1/DCC/SCN5A/EPHA7/DLG4/NCAN/UNC5D/CACNA1C/NELL2/UNC5A/RET/PLXNC1/ARTN/AGAP2/CHL1/FES/SLIT2/ANK1/ABLIM2/DNM1/CACNB2/SPTBN4/ANK2/SCN3A/EPHA5/CACNB1/SCN3B/PLXNA2/SCN9A/SHC3/SRGAP2/COL9A2/L1CAM/EPHA8/SPTB/SCN1B/DPYSL3/ITGB3/DPYSL4/COL4A1/NFASC/PRX
REACTOME_PHASE_II_CONJUGATION_OF_COMPOUNDS	REACTOME_PHASE_II_CONJUGATION_OF_COMPOUNDS	39	-0.497672	-1.69374	0.00369639	0.11237	0.106482	1237	tags=41%, list=15%, signal=35%	UGDH/MGST1/GSTA1/GLYATL1/GSTA2/MGST2/TPMT/GSTK1/UGT2B11/GGT1/MAT1A/UGT3A2/UGT2B28/NAT2/UGT2B4/UGT2B10
REACTOME_REGULATION_OF_RUNX3_EXPRESSION_AND_ACTIVITY	REACTOME_REGULATION_OF_RUNX3_EXPRESSION_AND_ACTIVITY	28	-0.533445	-1.76423	0.0043992	0.129422	0.12264	2716	tags=61%, list=34%, signal=40%	PSMD1/UBA52/PSMD13/TGFB1/PSMD5/PSMA5/PSMD12/SMURF2/PSMA1/PSMC6/PSMB2/PSMA4/MDM2/PSMA3/PSMB8/PSMA2/PSMA6
REACTOME_EXTENSION_OF_TELOMERES	REACTOME_EXTENSION_OF_TELOMERES	23	0.716129	1.63562	0.00522437	0.140977	0.133589	335	tags=17%, list=4%, signal=17%	TERT/PIF1/RTEL1/CCNA1
REACTOME_PEPTIDE_LIGAND_BINDING_RECEPTORS	REACTOME_PEPTIDE_LIGAND_BINDING_RECEPTORS	47	0.65035	1.60196	0.00508249	0.140977	0.133589	698	tags=38%, list=9%, signal=35%	RXFP4/GHRL/TACR1/PPY/SSTR3/CXCL12/CX3CL1/SSTR2/CXCL6/PYY/CXCL1/SSTR1/SST/SSTR5/NTS/CXCL8/CCKBR/GRPR
REACTOME_G_ALPHA_Q_SIGNALLING_EVENTS	REACTOME_G_ALPHA_Q_SIGNALLING_EVENTS	74	0.592061	1.50359	0.0052557	0.140977	0.133589	1510	tags=39%, list=19%, signal=32%	GHRL/TACR1/FFAR1/DGKB/FFAR2/TRPC7/GAST/CASR/GPR68/RGS5/NTS/ADRA1D/CCKBR/GRPR/RASGRP1/ARHGEF25/NPFFR2/RGS2/GNG11/ADRA1B/GNG4/RGS17/OXT/GCGR/ITPR1/DGKG/TRH/P2RY2/GNG2
REACTOME_SCF_BETA_TRCP_MEDIATED_DEGRADATION_OF_EMI1	REACTOME_SCF_BETA_TRCP_MEDIATED_DEGRADATION_OF_EMI1	25	-0.566328	-1.86346	0.00578133	0.142502	0.135035	1736	tags=60%, list=22%, signal=47%	PSMD1/UBA52/PSMD13/PSMD5/PSMA5/PSMD12/PSMA1/PSMC6/PSMB2/PSMA4/SKP1/PSMA3/PSMB8/PSMA2/PSMA6
REACTOME_PHASE_2_PLATEAU_PHASE	REACTOME_PHASE_2_PLATEAU_PHASE	11	0.825041	1.65845	0.00557305	0.142502	0.135035	958	tags=73%, list=12%, signal=64%	CACNG7/CACNG6/CACNG8/CACNA1C/KCNE4/CACNA2D2/CACNB2/CACNB1
REACTOME_SIGNALING_BY_ERBB4	REACTOME_SIGNALING_BY_ERBB4	28	0.686247	1.60499	0.00572261	0.142502	0.135035	416	tags=18%, list=5%, signal=17%	PGR/CXCL12/NRG3/GABRB2/DLG4
REACTOME_PLASMA_LIPOPROTEIN_CLEARANCE	REACTOME_PLASMA_LIPOPROTEIN_CLEARANCE	17	-0.65073	-2.00912	0.006261	0.147653	0.139916	1191	tags=47%, list=15%, signal=40%	APOA1/NPC2/NCEH1/SCARB1/LIPA/LIPC/AMN/CES3
REACTOME_G_ALPHA_S_SIGNALLING_EVENTS	REACTOME_G_ALPHA_S_SIGNALLING_EVENTS	59	0.607843	1.52185	0.00631413	0.147653	0.139916	1150	tags=36%, list=14%, signal=31%	GPHA2/TSHR/PDE1B/IAPP/GPR83/PDE10A/RAMP3/GIPR/GIP/SCT/PDE2A/GNAZ/ADORA2A/ADCY2/ADCY1/GPR20/GNG11/GNG4/GLP1R/PTHLH/GCGR
REACTOME_G_ALPHA_I_SIGNALLING_EVENTS	REACTOME_G_ALPHA_I_SIGNALLING_EVENTS	111	0.548803	1.43465	0.00657231	0.149849	0.141996	1160	tags=33%, list=14%, signal=29%	RXFP4/PPY/PDE1B/GRM3/SSTR3/CXCL12/CAMK2B/CX3CL1/SSTR2/CXCL6/PRKCG/PYY/CASR/GABBR2/CXCL1/RGS5/TAS2R5/SSTR1/SST/PTGDR2/SSTR5/GNAZ/CXCL8/PTGER3/ADCY2/ADCY1/RGS9/GPSM3/ADRA2C/NBEA/GABBR1/GNG11/GNG4/PDE4B/RGS17/RGS7/PENK
REACTOME_UNBLOCKING_OF_NMDA_RECEPTORS_GLUTAMATE_BINDING_AND_ACTIVATION	REACTOME_UNBLOCKING_OF_NMDA_RECEPTORS_GLUTAMATE_BINDING_AND_ACTIVATION	12	0.802735	1.63506	0.00739528	0.160255	0.151857	699	tags=50%, list=9%, signal=46%	CAMK2B/GRIA1/DLG4/GRIA4/NEFL/GRIA2
REACTOME_AMYLOID_FIBER_FORMATION	REACTOME_AMYLOID_FIBER_FORMATION	23	0.706948	1.61465	0.00755586	0.160255	0.151857	452	tags=22%, list=6%, signal=21%	NAT8/CALB1/INS/IAPP/LYZ
REACTOME_PEPTIDE_HORMONE_METABOLISM	REACTOME_PEPTIDE_HORMONE_METABOLISM	40	0.651651	1.58149	0.00750099	0.160255	0.151857	767	tags=32%, list=10%, signal=30%	GHRL/FFAR1/PAX6/INS/ISL1/PCSK2/PCSK1/GIP/MBOAT4/KIF5A/SLC30A8/KIF5C/ERO1B
REACTOME_NUCLEAR_SIGNALING_BY_ERBB4	REACTOME_NUCLEAR_SIGNALING_BY_ERBB4	17	0.751662	1.64162	0.00820519	0.170071	0.161159	262	tags=18%, list=3%, signal=17%	PGR/CXCL12/NRG3
REACTOME_SIGNALING_BY_NOTCH1_HD_DOMAIN_MUTANTS_IN_CANCER	REACTOME_SIGNALING_BY_NOTCH1_HD_DOMAIN_MUTANTS_IN_CANCER	10	0.818367	1.62024	0.0086039	0.174372	0.165235	692	tags=40%, list=9%, signal=37%	NEURL1/NEURL1B/DLL1/DLL4
REACTOME_TRAFFICKING_OF_AMPA_RECEPTORS	REACTOME_TRAFFICKING_OF_AMPA_RECEPTORS	21	0.702757	1.58042	0.00894112	0.177267	0.167979	699	tags=33%, list=9%, signal=31%	CAMK2B/GRIA1/CACNG8/PRKCG/DLG4/GRIA4/GRIA2
REACTOME_REGULATION_OF_GENE_EXPRESSION_IN_LATE_STAGE_BRANCHING_MORPHOGENESIS_PANCREATIC_BUD_PRECURSOR_CELLS	REACTOME_REGULATION_OF_GENE_EXPRESSION_IN_LATE_STAGE_BRANCHING_MORPHOGENESIS_PANCREATIC_BUD_PRECURSOR_CELLS	11	0.811283	1.63079	0.00964372	0.185735	0.176003	441	tags=36%, list=5%, signal=34%	ONECUT3/ONECUT1/NEUROG3/KAT2B
REACTOME_TELOMERE_MAINTENANCE	REACTOME_TELOMERE_MAINTENANCE	29	0.669385	1.57012	0.00977554	0.185735	0.176003	335	tags=14%, list=4%, signal=13%	TERT/PIF1/RTEL1/CCNA1
REACTOME_ANTIGEN_PRESENTATION_FOLDING_ASSEMBLY_AND_PEPTIDE_LOADING_OF_CLASS_I_MHC	REACTOME_ANTIGEN_PRESENTATION_FOLDING_ASSEMBLY_AND_PEPTIDE_LOADING_OF_CLASS_I_MHC	19	-0.597794	-1.8806	0.0101831	0.18574	0.176007	2034	tags=79%, list=25%, signal=59%	SEC31A/PIK3C3/SEC23A/SEC24A/ERAP2/PIK3R4/SAR1B/ATG14/ERAP1/CANX/HSPA5/HLA-B/PDIA3/HLA-F/B2M
REACTOME_NOTCH2_ACTIVATION_AND_TRANSMISSION_OF_SIGNAL_TO_THE_NUCLEUS	REACTOME_NOTCH2_ACTIVATION_AND_TRANSMISSION_OF_SIGNAL_TO_THE_NUCLEUS	14	0.760094	1.60286	0.0101414	0.18574	0.176007	692	tags=29%, list=9%, signal=26%	NEURL1/NEURL1B/DLL1/DLL4
REACTOME_ASPIRIN_ADME	REACTOME_ASPIRIN_ADME	16	-0.643699	-1.93525	0.0111303	0.195209	0.18498	539	tags=44%, list=7%, signal=41%	UGT2B11/UGT3A2/ALB/CYP2D6/UGT2B28/UGT2B4/UGT2B10
REACTOME_LONG_TERM_POTENTIATION	REACTOME_LONG_TERM_POTENTIATION	12	0.789933	1.60898	0.0109778	0.195209	0.18498	699	tags=42%, list=9%, signal=38%	CAMK2B/GRIA1/DLG4/NEFL/GRIA2
REACTOME_DISEASES_OF_IMMUNE_SYSTEM	REACTOME_DISEASES_OF_IMMUNE_SYSTEM	18	-0.589638	-1.85638	0.0118968	0.204716	0.193988	609	tags=33%, list=8%, signal=31%	FGG/FGA/FGB/TLR2/S100A1/TLR6
REACTOME_ABC_FAMILY_PROTEINS_MEDIATED_TRANSPORT	REACTOME_ABC_FAMILY_PROTEINS_MEDIATED_TRANSPORT	53	-0.410347	-1.53261	0.0133011	0.224641	0.21287	1345	tags=40%, list=17%, signal=33%	DERL1/PSMA1/EIF2S2/PSMC6/PEX3/APOA1/PSMB2/PSMA4/ABCD1/ABCC4/PSMA3/ABCA12/CFTR/ABCC11/PSMB8/PSMA2/PSMA6/ABCB4/ABCB1/DERL3/ABCA8
REACTOME_ANTIMICROBIAL_PEPTIDES	REACTOME_ANTIMICROBIAL_PEPTIDES	15	-0.634206	-1.86637	0.0139847	0.22775	0.215816	439	tags=53%, list=5%, signal=51%	PRSS3/ITLN1/PLA2G2A/BPIFB1/TLR2/SLC11A1/BPIFA2/BPIFA1
REACTOME_METABOLISM_OF_POLYAMINES	REACTOME_METABOLISM_OF_POLYAMINES	31	-0.506948	-1.66646	0.013863	0.22775	0.215816	1736	tags=48%, list=22%, signal=38%	AGMAT/PSMD5/PSMA5/PSMD12/ODC1/PSMA1/PSMC6/PSMB2/PSMA4/AMD1/SAT1/PSMA3/PSMB8/PSMA2/PSMA6
REACTOME_GABA_B_RECEPTOR_ACTIVATION	REACTOME_GABA_B_RECEPTOR_ACTIVATION	19	0.720046	1.58919	0.0144927	0.231882	0.219732	1510	tags=68%, list=19%, signal=56%	KCNJ5/GABBR2/KCNJ6/ADCY2/ADCY1/GABBR1/GNG11/GNG4/KCNJ2/ADCY3/ADCY7/ADCY8/GNG2
REACTOME_STABILIZATION_OF_P53	REACTOME_STABILIZATION_OF_P53	27	-0.54424	-1.7867	0.0156468	0.246032	0.23314	1736	tags=56%, list=22%, signal=44%	PSMD1/UBA52/PSMD13/PSMD5/PSMA5/PSMD12/PSMA1/PSMC6/PSMB2/PSMA4/MDM2/PSMA3/PSMB8/PSMA2/PSMA6
REACTOME_SYNTHESIS_SECRETION_AND_INACTIVATION_OF_GLUCAGON_LIKE_PEPTIDE_1_GLP_1	REACTOME_SYNTHESIS_SECRETION_AND_INACTIVATION_OF_GLUCAGON_LIKE_PEPTIDE_1_GLP_1	10	0.793593	1.5712	0.0170952	0.26425	0.250404	373	tags=30%, list=5%, signal=29%	FFAR1/PAX6/PCSK1
REACTOME_NEGATIVE_REGULATION_OF_NMDA_RECEPTOR_MEDIATED_NEURONAL_TRANSMISSION	REACTOME_NEGATIVE_REGULATION_OF_NMDA_RECEPTOR_MEDIATED_NEURONAL_TRANSMISSION	11	0.791955	1.59194	0.0178243	0.270929	0.256732	701	tags=45%, list=9%, signal=42%	CAMK2B/CAMK1/DLG4/NEFL/PPM1E
REACTOME_INSULIN_PROCESSING	REACTOME_INSULIN_PROCESSING	16	0.739103	1.59547	0.0190243	0.284429	0.269525	767	tags=44%, list=10%, signal=40%	INS/PCSK2/PCSK1/KIF5A/SLC30A8/KIF5C/ERO1B
REACTOME_ACTIVATED_NOTCH1_TRANSMITS_SIGNAL_TO_THE_NUCLEUS	REACTOME_ACTIVATED_NOTCH1_TRANSMITS_SIGNAL_TO_THE_NUCLEUS	20	0.704637	1.57276	0.0202253	0.297507	0.281918	923	tags=30%, list=11%, signal=27%	NEURL1/NEURL1B/DLL1/DLL4/DTX1/DNER
REACTOME_GLUCURONIDATION	REACTOME_GLUCURONIDATION	11	-0.671663	-1.78518	0.021472	0.310833	0.294545	539	tags=45%, list=7%, signal=42%	UGT2B11/UGT3A2/UGT2B28/UGT2B4/UGT2B10
REACTOME_DECTIN_1_MEDIATED_NONCANONICAL_NF_KB_SIGNALING	REACTOME_DECTIN_1_MEDIATED_NONCANONICAL_NF_KB_SIGNALING	32	-0.480187	-1.58541	0.0219007	0.312085	0.295732	1736	tags=53%, list=22%, signal=42%	PSMD1/UBA52/PSMD13/UBA3/PSMD5/PSMA5/CHUK/PSMD12/PSMA1/PSMC6/PSMB2/PSMA4/SKP1/PSMA3/PSMB8/PSMA2/PSMA6
REACTOME_PEROXISOMAL_LIPID_METABOLISM	REACTOME_PEROXISOMAL_LIPID_METABOLISM	19	-0.556202	-1.74976	0.0232887	0.326758	0.309636	1794	tags=58%, list=22%, signal=45%	SLC25A17/PHYH/CROT/EHHADH/SCP2/ECI2/NUDT19/ABCD1/NUDT7/SLC27A2/ACOX2
REACTOME_G_ALPHA_Z_SIGNALLING_EVENTS	REACTOME_G_ALPHA_Z_SIGNALLING_EVENTS	23	0.65891	1.50494	0.023895	0.330185	0.312883	1843	tags=61%, list=23%, signal=47%	PRKCG/GNAZ/ADCY2/ADCY1/ADRA2C/GNG11/GNG4/RGS17/ADCY3/ADCY7/ADCY8/GNG2/PRKCA/ADCY9
REACTOME_SIGNALING_BY_NOTCH2	REACTOME_SIGNALING_BY_NOTCH2	18	0.694829	1.52007	0.0268541	0.364847	0.345728	692	tags=22%, list=9%, signal=20%	NEURL1/NEURL1B/DLL1/DLL4
REACTOME_ESTROGEN_DEPENDENT_GENE_EXPRESSION	REACTOME_ESTROGEN_DEPENDENT_GENE_EXPRESSION	42	0.592486	1.4467	0.0272035	0.364847	0.345728	457	tags=12%, list=6%, signal=11%	PGR/MYB/CXCL12/KAT2B/BCL2
REACTOME_NCAM_SIGNALING_FOR_NEURITE_OUT_GROWTH	REACTOME_NCAM_SIGNALING_FOR_NEURITE_OUT_GROWTH	35	0.613576	1.47687	0.0276243	0.365121	0.345989	1854	tags=51%, list=23%, signal=40%	COL9A1/GFRA1/NCAM1/NCAN/CACNA1C/ARTN/CACNB2/SPTBN4/CACNB1/COL9A2/SPTB/COL4A1/COL4A2/SPTBN2/FYN/COL4A5/CACNA1H/CACNB3
REACTOME_CLASS_B_2_SECRETIN_FAMILY_RECEPTORS	REACTOME_CLASS_B_2_SECRETIN_FAMILY_RECEPTORS	33	0.624688	1.4982	0.0285341	0.371758	0.352278	1584	tags=58%, list=20%, signal=46%	WNT7B/IAPP/RAMP3/GIPR/GIP/SCT/PTCH2/UCN3/IHH/WNT9A/GNG11/GNG4/GLP1R/PTHLH/GCGR/PTCH1/WNT11/GNG2/FZD1
REACTOME_LDL_CLEARANCE	REACTOME_LDL_CLEARANCE	11	-0.6528	-1.73505	0.0300607	0.386132	0.365898	1052	tags=55%, list=13%, signal=47%	CLTC/APOB/NPC2/NCEH1/LIPA/CES3
REACTOME_NEGATIVE_REGULATION_OF_NOTCH4_SIGNALING	REACTOME_NEGATIVE_REGULATION_OF_NOTCH4_SIGNALING	29	-0.461188	-1.51728	0.0305084	0.38644	0.36619	2716	tags=55%, list=34%, signal=37%	PSMD1/UBA52/PSMD13/YWHAZ/PSMD5/PSMA5/PSMD12/PSMA1/PSMC6/PSMB2/PSMA4/SKP1/PSMA3/PSMB8/PSMA2/PSMA6
REACTOME_INTERACTION_BETWEEN_L1_AND_ANKYRINS	REACTOME_INTERACTION_BETWEEN_L1_AND_ANKYRINS	18	0.686572	1.502	0.0376671	0.464221	0.439896	1653	tags=72%, list=21%, signal=58%	SCN5A/ANK1/SPTBN4/ANK2/SCN3A/SCN3B/SCN9A/L1CAM/SPTB/SCN1B/NFASC/SPTBN2/NRCAM
REACTOME_DAG_AND_IP3_SIGNALING	REACTOME_DAG_AND_IP3_SIGNALING	29	0.612493	1.43667	0.0375	0.464221	0.439896	2090	tags=48%, list=26%, signal=36%	PDE1B/CAMK2B/PRKCG/ADCY2/ADCY1/NBEA/ADCY3/ITPR1/ADCY7/ADCY8/PRKCA/ADCY9/PDE1A/ADCY6
REACTOME_PYROPTOSIS	REACTOME_PYROPTOSIS	12	-0.629034	-1.72188	0.0390142	0.468543	0.443991	1110	tags=50%, list=14%, signal=43%	CHMP2B/CASP3/IL1A/CASP4/CASP5/CASP1
REACTOME_PINK1_PRKN_MEDIATED_MITOPHAGY	REACTOME_PINK1_PRKN_MEDIATED_MITOPHAGY	19	-0.518598	-1.63146	0.0441827	0.468543	0.443991	2930	tags=79%, list=36%, signal=50%	TOMM20/TOMM22/UBE2N/VDAC1/UBA52/OPTN/UBE2L3/MFN1/TOMM70/ATG5/TBK1/MAP1LC3B/PRKN/VDAC2/MTERF3
REACTOME_COMPLEMENT_CASCADE	REACTOME_COMPLEMENT_CASCADE	18	-0.509066	-1.60271	0.0430439	0.468543	0.443991	734	tags=61%, list=9%, signal=56%	MASP1/PROS1/C5AR1/C6/MBL2/C4BPB/C8A/CPN1/C8B/CPN2/CFB
REACTOME_PLATELET_CALCIUM_HOMEOSTASIS	REACTOME_PLATELET_CALCIUM_HOMEOSTASIS	13	0.735159	1.5298	0.0412414	0.468543	0.443991	424	tags=38%, list=5%, signal=36%	ATP2A3/TRPC7/SLC8A3/ATP2B2/P2RX6
REACTOME_BBSOME_MEDIATED_CARGO_TARGETING_TO_CILIUM	REACTOME_BBSOME_MEDIATED_CARGO_TARGETING_TO_CILIUM	11	0.741667	1.49085	0.0429688	0.468543	0.443991	273	tags=18%, list=3%, signal=18%	SSTR3/BBS1
REACTOME_COLLAGEN_CHAIN_TRIMERIZATION	REACTOME_COLLAGEN_CHAIN_TRIMERIZATION	26	0.622925	1.44073	0.0426267	0.468543	0.443991	1385	tags=46%, list=17%, signal=38%	COL19A1/COL13A1/COL9A1/COL25A1/COL16A1/COL4A6/COL27A1/COL1A2/COL12A1/COL9A2/COL4A1/COL4A2
REACTOME_SIGNALING_BY_NOTCH3	REACTOME_SIGNALING_BY_NOTCH3	30	0.60504	1.43213	0.0417136	0.468543	0.443991	692	tags=20%, list=9%, signal=18%	FABP7/NEURL1/NEURL1B/DLL1/KAT2B/DLL4
REACTOME_CHROMOSOME_MAINTENANCE	REACTOME_CHROMOSOME_MAINTENANCE	40	0.578692	1.40442	0.0418502	0.468543	0.443991	1669	tags=28%, list=21%, signal=22%	TERT/PIF1/RTEL1/CCNA1/CENPM/CHTF18/CENPO/CENPL/CENPW/OIP5/POLA2
REACTOME_STIMULI_SENSING_CHANNELS	REACTOME_STIMULI_SENSING_CHANNELS	42	0.573773	1.401	0.0413493	0.468543	0.443991	1563	tags=36%, list=19%, signal=29%	TRPC4/ANO3/TRPA1/ASIC4/TRPC7/RYR2/TRPM5/ANO4/ANO7/UNC79/RYR1/CLCN4/RIPK3/CLCN1/WNK2
REACTOME_L1CAM_INTERACTIONS	REACTOME_L1CAM_INTERACTIONS	66	0.546508	1.38176	0.0397074	0.468543	0.443991	1295	tags=30%, list=16%, signal=26%	DCX/NCAM1/KIF4A/GAP43/SCN5A/DLG4/NCAN/CHL1/ANK1/DNM1/SPTBN4/ANK2/SCN3A/SCN3B/SCN9A/L1CAM/SPTB/SCN1B/ITGB3/NFASC
REACTOME_TOLL_LIKE_RECEPTOR_TLR1_TLR2_CASCADE	REACTOME_TOLL_LIKE_RECEPTOR_TLR1_TLR2_CASCADE	66	-0.352162	-1.36917	0.0440311	0.468543	0.443991	797	tags=20%, list=10%, signal=18%	VRK3/CASP8/MAP3K8/IKBIP/FGG/RPS6KA5/FGA/FGB/TIFA/MEF2C/TLR2/S100A1/TLR6
REACTOME_CELL_SURFACE_INTERACTIONS_AT_THE_VASCULAR_WALL	REACTOME_CELL_SURFACE_INTERACTIONS_AT_THE_VASCULAR_WALL	65	-0.334995	-1.29874	0.0432081	0.468543	0.443991	686	tags=26%, list=9%, signal=24%	PROS1/ITGA6/CD58/EPCAM/JAML/ITGA3/TSPAN7/SLC7A9/CEACAM5/CEACAM6/SLC7A10/MIF/CEACAM1/PECAM1/ITGAX/SELL/VPREB3
REACTOME_SIGNALING_BY_FGFR2_IN_DISEASE	REACTOME_SIGNALING_BY_FGFR2_IN_DISEASE	12	0.730171	1.48726	0.0454545	0.472613	0.447848	245	tags=17%, list=3%, signal=16%	FGF18/FGF9
REACTOME_SRP_DEPENDENT_COTRANSLATIONAL_PROTEIN_TARGETING_TO_MEMBRANE	REACTOME_SRP_DEPENDENT_COTRANSLATIONAL_PROTEIN_TARGETING_TO_MEMBRANE	52	-0.362284	-1.34902	0.045603	0.472613	0.447848	3391	tags=69%, list=42%, signal=40%	RPS4X/RPS16/RPL6/SPCS1/RPL21/RPL9/RPS3A/RPL14/SPCS3/RPL4/SRPRB/RPL32/RPS13/RPL19/RPL28/SEC11A/RPL7/TRAM1/UBA52/RPS7/RPL37/SRP68/RPL5/RPS15A/RPL15/RPS14/RPL24/RPL23/RPS6/RPL39L/SSR3/SSR1/SSR2/RPS27L/RPL26L1/RPN2
REACTOME_CA_DEPENDENT_EVENTS	REACTOME_CA_DEPENDENT_EVENTS	25	0.627928	1.44615	0.047235	0.474267	0.449415	2090	tags=52%, list=26%, signal=39%	PDE1B/CAMK2B/PRKCG/ADCY2/ADCY1/NBEA/ADCY3/ADCY7/ADCY8/PRKCA/ADCY9/PDE1A/ADCY6
REACTOME_G_PROTEIN_MEDIATED_EVENTS	REACTOME_G_PROTEIN_MEDIATED_EVENTS	33	0.595926	1.42922	0.0466149	0.474267	0.449415	2117	tags=48%, list=26%, signal=36%	PDE1B/CAMK2B/PRKCG/ADCY2/ADCY1/NBEA/ADCY3/ITPR1/ADCY7/ADCY8/PRKCA/ADCY9/PDE1A/ADCY6/PLCB3/PLCB1
REACTOME_NUCLEAR_EVENTS_MEDIATED_BY_NFE2L2	REACTOME_NUCLEAR_EVENTS_MEDIATED_BY_NFE2L2	51	-0.362909	-1.33525	0.0473227	0.474267	0.449415	1736	tags=37%, list=22%, signal=29%	PSMA5/TXN/IDH1/PSMD12/BACH1/PSMA1/PSMC6/PRDX1/PSMB2/GSTA1/PSMA4/SKP1/PSMA3/SOD3/PSMB8/EGF/PSMA2/PSMA6/AREG
REACTOME_EGFR_DOWNREGULATION	REACTOME_EGFR_DOWNREGULATION	11	-0.624455	-1.65971	0.0508282	0.482868	0.457565	942	tags=45%, list=12%, signal=40%	BTC/SPRY1/SH3GL3/EGF/AREG
REACTOME_NPAS4_REGULATES_EXPRESSION_OF_TARGET_GENES	REACTOME_NPAS4_REGULATES_EXPRESSION_OF_TARGET_GENES	11	0.732386	1.4722	0.0507812	0.482868	0.457565	1029	tags=45%, list=13%, signal=40%	RBFOX3/INS/NPAS4/RET/ARNT2
REACTOME_GLUCAGON_TYPE_LIGAND_RECEPTORS	REACTOME_GLUCAGON_TYPE_LIGAND_RECEPTORS	12	0.720514	1.46759	0.0506494	0.482868	0.457565	1510	tags=67%, list=19%, signal=54%	GIPR/GIP/SCT/GNG11/GNG4/GLP1R/GCGR/GNG2
REACTOME_NCAM1_INTERACTIONS	REACTOME_NCAM1_INTERACTIONS	22	0.647185	1.46463	0.0504103	0.482868	0.457565	1385	tags=50%, list=17%, signal=42%	COL9A1/GFRA1/NCAM1/NCAN/CACNA1C/ARTN/CACNB2/CACNB1/COL9A2/COL4A1/COL4A2
REACTOME_ION_CHANNEL_TRANSPORT	REACTOME_ION_CHANNEL_TRANSPORT	81	0.520065	1.32944	0.0507772	0.482868	0.457565	1058	tags=22%, list=13%, signal=19%	TRPC4/ANO3/TRPA1/CAMK2B/FXYD6/PLN/ASIC4/ATP2A3/TRPC7/RYR2/ATP2B2/TRPM5/ANO4/ATP6V1G2/ANO7/ATP8B3/UNC79/ATP8A1
REACTOME_CRMPS_IN_SEMA3A_SIGNALING	REACTOME_CRMPS_IN_SEMA3A_SIGNALING	10	0.743473	1.47197	0.0528402	0.496806	0.470773	1722	tags=80%, list=21%, signal=63%	DPYSL5/FES/PLXNA2/DPYSL3/DPYSL4/CRMP1/FYN/PLXNA1
REACTOME_G0_AND_EARLY_G1	REACTOME_G0_AND_EARLY_G1	10	0.742492	1.47002	0.0554822	0.511108	0.484326	946	tags=50%, list=12%, signal=44%	CCNA1/CDC25A/E2F1/CDC6/CCNE2
REACTOME_MITOTIC_SPINDLE_CHECKPOINT	REACTOME_MITOTIC_SPINDLE_CHECKPOINT	50	0.549956	1.36607	0.0553191	0.511108	0.484326	1370	tags=24%, list=17%, signal=20%	SPC24/UBE2C/BIRC5/CENPE/CENPM/DYNC1I1/ZWINT/SGO2/CENPO/ANAPC15/SGO1/CENPL
REACTOME_CELLULAR_RESPONSE_TO_CHEMICAL_STRESS	REACTOME_CELLULAR_RESPONSE_TO_CHEMICAL_STRESS	90	-0.290263	-1.22942	0.056201	0.512553	0.485695	3048	tags=59%, list=38%, signal=37%	CUL3/GSK3B/PRKCI/ATF4/PSMC2/STAT3/NCOA2/PRKCD/TBL1XR1/MUL1/SOD1/PSMD1/GSR/UBA52/PSMD13/SP1/ABCF2/COX4I1/COX6C/NDUFA4/FBXL17/BLVRB/SLC7A11/PSMD5/ERO1A/CYCS/PSMA5/GPX8/PRDX3/PRDX6/ATP7A/TXN/IDH1/PSMD12/BACH1/MAP1LC3B/PSMA1/PSMC6/PRDX1/PSMB2/GSTA1/PSMA4/SKP1/PSMA3/SESN1/TXNIP/SOD3/PSMB8/EGF/PSMA2/PSMA6/AREG/ALB
REACTOME_TRANSCRIPTIONAL_REGULATION_BY_NPAS4	REACTOME_TRANSCRIPTIONAL_REGULATION_BY_NPAS4	17	0.666393	1.45539	0.0596833	0.533639	0.505676	519	tags=24%, list=6%, signal=22%	RBFOX3/INS/NPAS4/RET
REACTOME_INSULIN_RECEPTOR_SIGNALLING_CASCADE	REACTOME_INSULIN_RECEPTOR_SIGNALLING_CASCADE	18	0.659359	1.44247	0.0595383	0.533639	0.505676	254	tags=17%, list=3%, signal=16%	FGF18/FGF9/INS
REACTOME_SEROTONIN_NEUROTRANSMITTER_RELEASE_CYCLE	REACTOME_SEROTONIN_NEUROTRANSMITTER_RELEASE_CYCLE	12	0.709251	1.44465	0.061039	0.540461	0.512141	1528	tags=67%, list=19%, signal=54%	SNAP25/SYN1/TSPOAP1/PPFIA3/SYN2/RAB3A/STXBP1/STX1A
REACTOME_TRANSCRIPTIONAL_REGULATION_OF_PLURIPOTENT_STEM_CELLS	REACTOME_TRANSCRIPTIONAL_REGULATION_OF_PLURIPOTENT_STEM_CELLS	11	0.718793	1.44487	0.0625	0.543634	0.515147	316	tags=18%, list=4%, signal=17%	HIF3A/DKK1
REACTOME_INTERLEUKIN_1_FAMILY_SIGNALING	REACTOME_INTERLEUKIN_1_FAMILY_SIGNALING	73	-0.318116	-1.27246	0.0625894	0.543634	0.515147	1736	tags=32%, list=22%, signal=25%	PSMA5/TBK1/CHUK/IL1R2/AGER/PSMD12/PTPN13/PSMA1/PSMC6/PSMB2/PSMA4/SKP1/PSMA3/CASP8/MAP3K8/IKBIP/IL1A/IL33/TIFA/PSMB8/PSMA2/PSMA6/CASP1
REACTOME_SUMOYLATION_OF_INTRACELLULAR_RECEPTORS	REACTOME_SUMOYLATION_OF_INTRACELLULAR_RECEPTORS	12	0.705577	1.43716	0.0636364	0.547513	0.518823	37	tags=8%, list=0%, signal=8%	PGR
REACTOME_KINESINS	REACTOME_KINESINS	30	0.587944	1.39166	0.0642616	0.547725	0.519023	1359	tags=33%, list=17%, signal=28%	KIF20A/KIF4A/CENPE/KIF19/KIF5A/KIFC1/KIF26A/KIF6/KIF12/KLC1
REACTOME_DISEASES_ASSOCIATED_WITH_N_GLYCOSYLATION_OF_PROTEINS	REACTOME_DISEASES_ASSOCIATED_WITH_N_GLYCOSYLATION_OF_PROTEINS	11	-0.606668	-1.61244	0.0661786	0.558842	0.529558	2808	tags=82%, list=35%, signal=53%	ALG13/ALG9/B4GALT1/ALG2/ALG3/ALG8/ALG6/GLB1/ALG14
REACTOME_AZATHIOPRINE_ADME	REACTOME_AZATHIOPRINE_ADME	14	-0.550456	-1.55565	0.0691367	0.575945	0.545765	1821	tags=64%, list=23%, signal=50%	NUDT15/RAC1/VAV3/GSTA1/NME2/GSTA2/ABCC4/TPMT/SLC28A3
REACTOME_KIDNEY_DEVELOPMENT	REACTOME_KIDNEY_DEVELOPMENT	14	0.683974	1.44234	0.0696517	0.575945	0.545765	1423	tags=71%, list=18%, signal=59%	GREM1/GFRA1/DLL1/RET/SLIT2/OSR1/PCDH19/ID4/LFNG/WNT11
REACTOME_PLATELET_HOMEOSTASIS	REACTOME_PLATELET_HOMEOSTASIS	41	0.553968	1.34859	0.0700986	0.575945	0.545765	1570	tags=39%, list=20%, signal=32%	PDE1B/ATP2A3/PDE10A/TRPC7/SLC8A3/ATP2B2/P2RX6/PDE2A/GNG11/GNG4/KCNMB4/ITPR1/ATP2B4/GNG2/PDE9A/NOS2
REACTOME_METABOLISM_OF_STEROIDS	REACTOME_METABOLISM_OF_STEROIDS	66	-0.330834	-1.28625	0.0720128	0.5812	0.550745	848	tags=41%, list=11%, signal=37%	AKR1C3/HSD17B11/AKR1C1/SAR1B/HSD17B14/STARD4/SCP2/CYP7B1/HMGCS1/SC5D/NSDHL/PLPP6/IDI1/SQLE/INSIG1/AKR1C2/HSD17B12/SLC51A/MSMO1/SLC51B/CYP39A1/SLC27A2/ACOX2/SERPINA6/SRD5A3/ALB/CYP11A1
REACTOME_KEAP1_NFE2L2_PATHWAY	REACTOME_KEAP1_NFE2L2_PATHWAY	65	-0.318169	-1.23351	0.0720128	0.5812	0.550745	1736	tags=32%, list=22%, signal=26%	PSMA5/TXN/IDH1/PSMD12/BACH1/MAP1LC3B/PSMA1/PSMC6/PRDX1/PSMB2/GSTA1/PSMA4/SKP1/PSMA3/SESN1/SOD3/PSMB8/EGF/PSMA2/PSMA6/AREG
REACTOME_FCERI_MEDIATED_NF_KB_ACTIVATION	REACTOME_FCERI_MEDIATED_NF_KB_ACTIVATION	42	-0.375273	-1.32265	0.0730909	0.584727	0.554087	1736	tags=33%, list=22%, signal=26%	PSMA5/CHUK/PSMD12/PSMA1/PSMC6/PSMB2/PSMA4/SKP1/PSMA3/BCL10/UBE2D1/PSMB8/PSMA2/PSMA6
REACTOME_CALNEXIN_CALRETICULIN_CYCLE	REACTOME_CALNEXIN_CALRETICULIN_CYCLE	12	-0.597135	-1.63456	0.0745255	0.585925	0.555222	2691	tags=83%, list=33%, signal=56%	UGGT1/UBA52/EDEM3/TRIM13/EDEM1/SEL1L/CANX/UGGT2/PDIA3/RNF103
REACTOME_NOTCH3_ACTIVATION_AND_TRANSMISSION_OF_SIGNAL_TO_THE_NUCLEUS	REACTOME_NOTCH3_ACTIVATION_AND_TRANSMISSION_OF_SIGNAL_TO_THE_NUCLEUS	17	0.656424	1.43362	0.0742996	0.585925	0.555222	692	tags=24%, list=9%, signal=22%	NEURL1/NEURL1B/DLL1/DLL4
REACTOME_REGULATED_NECROSIS	REACTOME_REGULATED_NECROSIS	31	-0.422211	-1.38791	0.0789988	0.610854	0.578845	2372	tags=58%, list=29%, signal=41%	UBE2L3/PDCD6IP/PELI1/SDCBP/CHMP3/CYCS/IRF2/RIPK1/PRKN/CHMP2B/BIRC3/CASP3/CASP8/IL1A/TNFSF10/CASP4/CASP5/CASP1
REACTOME_DOWNSTREAM_SIGNALING_EVENTS_OF_B_CELL_RECEPTOR_BCR	REACTOME_DOWNSTREAM_SIGNALING_EVENTS_OF_B_CELL_RECEPTOR_BCR	41	-0.378825	-1.32632	0.079036	0.610854	0.578845	1736	tags=34%, list=22%, signal=27%	PSMA5/CHUK/PSMD12/PSMA1/PSMC6/PSMB2/PSMA4/NFATC1/SKP1/PSMA3/BCL10/PSMB8/PSMA2/PSMA6
REACTOME_OPIOID_SIGNALLING	REACTOME_OPIOID_SIGNALLING	46	0.544082	1.33977	0.0839612	0.643468	0.60975	2117	tags=43%, list=26%, signal=32%	PDE1B/CAMK2B/PRKCG/ADCY2/ADCY1/NBEA/GNG11/GNG4/PDE4B/ADCY3/ITPR1/ADCY7/ADCY8/GNG2/PRKCA/ADCY9/PDE1A/ADCY6/PLCB3/PLCB1
REACTOME_SENSORY_PROCESSING_OF_SOUND	REACTOME_SENSORY_PROCESSING_OF_SOUND	35	0.560798	1.34983	0.0850829	0.64663	0.612746	812	tags=26%, list=10%, signal=23%	SNAP25/SLC17A8/SYN1/SYP/ATP2B2/CACNA2D2/BSN/CACNB2/MYO3A
REACTOME_DOPAMINE_NEUROTRANSMITTER_RELEASE_CYCLE	REACTOME_DOPAMINE_NEUROTRANSMITTER_RELEASE_CYCLE	15	0.665126	1.41666	0.0876543	0.65202	0.617853	1528	tags=53%, list=19%, signal=43%	SNAP25/SYN1/TSPOAP1/PPFIA3/SYN2/RAB3A/STXBP1/STX1A
REACTOME_DOWNSTREAM_SIGNALING_OF_ACTIVATED_FGFR4	REACTOME_DOWNSTREAM_SIGNALING_OF_ACTIVATED_FGFR4	10	0.709741	1.40518	0.0871863	0.65202	0.617853	245	tags=20%, list=3%, signal=19%	FGF18/FGF9
REACTOME_COLLAGEN_BIOSYNTHESIS_AND_MODIFYING_ENZYMES	REACTOME_COLLAGEN_BIOSYNTHESIS_AND_MODIFYING_ENZYMES	30	0.572485	1.35507	0.0879369	0.65202	0.617853	1385	tags=40%, list=17%, signal=33%	COL19A1/COL13A1/COL9A1/COL25A1/COL16A1/COL4A6/COL27A1/COL1A2/COL12A1/COL9A2/COL4A1/COL4A2
REACTOME_DAP12_INTERACTIONS	REACTOME_DAP12_INTERACTIONS	15	0.663353	1.41289	0.0888889	0.653763	0.619506	142	tags=13%, list=2%, signal=13%	SIGLEC15/LCK
REACTOME_ADRENALINE_NORADRENALINE_INHIBITS_INSULIN_SECRETION	REACTOME_ADRENALINE_NORADRENALINE_INHIBITS_INSULIN_SECRETION	11	0.700461	1.40802	0.0898438	0.6555	0.621151	2090	tags=82%, list=26%, signal=61%	CACNA1C/CACNA2D2/CACNB2/ADRA2C/GNG11/GNG4/GNG2/CACNB3/ADCY6
REACTOME_N_GLYCAN_TRIMMING_IN_THE_ER_AND_CALNEXIN_CALRETICULIN_CYCLE	REACTOME_N_GLYCAN_TRIMMING_IN_THE_ER_AND_CALNEXIN_CALRETICULIN_CYCLE	16	-0.52964	-1.59234	0.0919677	0.655653	0.621296	2691	tags=75%, list=33%, signal=50%	UGGT1/UBA52/EDEM3/TRIM13/NGLY1/EDEM1/SEL1L/DERL1/CANX/UGGT2/PDIA3/RNF103
REACTOME_SIGNALING_BY_FGFR3	REACTOME_SIGNALING_BY_FGFR3	14	0.670693	1.41434	0.0932836	0.655653	0.621296	245	tags=14%, list=3%, signal=14%	FGF18/FGF9
REACTOME_UPTAKE_AND_ACTIONS_OF_BACTERIAL_TOXINS	REACTOME_UPTAKE_AND_ACTIONS_OF_BACTERIAL_TOXINS	17	0.646947	1.41292	0.09257	0.655653	0.621296	1049	tags=29%, list=13%, signal=26%	SNAP25/STX1B/SV2A/SYT2/MAP2K6
REACTOME_G1_S_SPECIFIC_TRANSCRIPTION	REACTOME_G1_S_SPECIFIC_TRANSCRIPTION	12	0.687099	1.39953	0.0909091	0.655653	0.621296	1867	tags=67%, list=23%, signal=51%	CCNA1/CDC25A/E2F1/CDC6/TK1/CDT1/TYMS/LIN54
REACTOME_DISEASES_OF_GLYCOSYLATION	REACTOME_DISEASES_OF_GLYCOSYLATION	65	-0.3068	-1.18943	0.0934593	0.655653	0.621296	881	tags=26%, list=11%, signal=23%	C1GALT1/GPC3/C1GALT1C1/GALNT3/ADAMTS9/GPC4/MUC20/MUC3A/MUC1/SBSPON/SPON1/MUC15/SRD5A3/MUC16/PRELP/MUC13/MUC17
REACTOME_SIGNALING_BY_NOTCH1_PEST_DOMAIN_MUTANTS_IN_CANCER	REACTOME_SIGNALING_BY_NOTCH1_PEST_DOMAIN_MUTANTS_IN_CANCER	38	0.547561	1.33243	0.0948746	0.660501	0.62589	692	tags=16%, list=9%, signal=14%	NEURL1/NEURL1B/DLL1/HDAC10/KAT2B/DLL4
REACTOME_PURINERGIC_SIGNALING_IN_LEISHMANIASIS_INFECTION	REACTOME_PURINERGIC_SIGNALING_IN_LEISHMANIASIS_INFECTION	14	-0.519626	-1.46852	0.0964346	0.66433	0.629518	620	tags=29%, list=8%, signal=26%	TXNIP/IL1A/ENTPD5/CASP1
REACTOME_DISEASES_ASSOCIATED_WITH_O_GLYCOSYLATION_OF_PROTEINS	REACTOME_DISEASES_ASSOCIATED_WITH_O_GLYCOSYLATION_OF_PROTEINS	31	-0.412106	-1.35469	0.0971751	0.66433	0.629518	881	tags=42%, list=11%, signal=37%	C1GALT1/C1GALT1C1/GALNT3/ADAMTS9/MUC20/MUC3A/MUC1/SBSPON/SPON1/MUC15/MUC16/MUC13/MUC17
REACTOME_INTERLEUKIN_1_SIGNALING	REACTOME_INTERLEUKIN_1_SIGNALING	59	-0.330329	-1.24618	0.0976099	0.66433	0.629518	1736	tags=34%, list=22%, signal=27%	USP14/PSMA5/CHUK/IL1R2/AGER/PSMD12/PSMA1/PSMC6/PSMB2/PSMA4/SKP1/PSMA3/CASP8/MAP3K8/IKBIP/IL1A/TIFA/PSMB8/PSMA2/PSMA6
REACTOME_SIGNALING_BY_BMP	REACTOME_SIGNALING_BY_BMP	19	0.630499	1.39156	0.0986763	0.666613	0.631682	841	tags=21%, list=10%, signal=19%	NOG/GREM2/AMHR2/SMAD9
REACTOME_TOLL_LIKE_RECEPTOR_CASCADES	REACTOME_TOLL_LIKE_RECEPTOR_CASCADES	93	-0.292402	-1.2347	0.0994465	0.666876	0.631931	965	tags=22%, list=12%, signal=19%	SKP1/BIRC3/VRK3/CASP8/MAP3K8/UBE2D1/IKBIP/FGG/TANK/RPS6KA5/FGA/HSP90B1/FGB/TIFA/MEF2C/IRF5/CTSS/TLR2/S100A1/TLR6
REACTOME_TRANSCRIPTIONAL_AND_POST_TRANSLATIONAL_REGULATION_OF_MITF_M_EXPRESSION_AND_ACTIVITY	REACTOME_TRANSCRIPTIONAL_AND_POST_TRANSLATIONAL_REGULATION_OF_MITF_M_EXPRESSION_AND_ACTIVITY	15	-0.525228	-1.54567	0.101014	0.667572	0.632591	695	tags=33%, list=9%, signal=31%	EDN1/AIMP1/TFEB/LEF1/PAX3
REACTOME_A_TETRASACCHARIDE_LINKER_SEQUENCE_IS_REQUIRED_FOR_GAG_SYNTHESIS	REACTOME_A_TETRASACCHARIDE_LINKER_SEQUENCE_IS_REQUIRED_FOR_GAG_SYNTHESIS	10	0.697834	1.38161	0.100396	0.667572	0.632591	481	tags=30%, list=6%, signal=28%	B3GAT2/NCAN/B3GAT1
REACTOME_ADHERENS_JUNCTIONS_INTERACTIONS	REACTOME_ADHERENS_JUNCTIONS_INTERACTIONS	20	0.620495	1.38495	0.102381	0.671737	0.636537	362	tags=15%, list=4%, signal=14%	PRDM8/CDH18/CDH8
REACTOME_TRAFFICKING_OF_GLUR2_CONTAINING_AMPA_RECEPTORS	REACTOME_TRAFFICKING_OF_GLUR2_CONTAINING_AMPA_RECEPTORS	13	0.66952	1.39321	0.104592	0.67842	0.64287	1643	tags=54%, list=20%, signal=43%	GRIA1/PRKCG/GRIA4/GRIA2/GRIA3/GRIP2/PRKCA
REACTOME_TRANSCRIPTIONAL_REGULATION_BY_RUNX2	REACTOME_TRANSCRIPTIONAL_REGULATION_BY_RUNX2	57	-0.336181	-1.25585	0.104887	0.67842	0.64287	1343	tags=28%, list=17%, signal=24%	PSMA1/WWP1/PSMC6/PSMB2/COL1A1/PSMA4/HES1/GLI3/PPM1D/RUNX1/SKP1/PSMA3/PSMB8/PSMA2/PSMA6/MMP13
REACTOME_THE_NLRP3_INFLAMMASOME	REACTOME_THE_NLRP3_INFLAMMASOME	10	-0.579528	-1.48128	0.10739	0.689716	0.653575	620	tags=20%, list=8%, signal=18%	TXNIP/CASP1
REACTOME_ACTIVATION_OF_KAINATE_RECEPTORS_UPON_GLUTAMATE_BINDING	REACTOME_ACTIVATION_OF_KAINATE_RECEPTORS_UPON_GLUTAMATE_BINDING	13	0.667621	1.38926	0.109694	0.689937	0.653783	1060	tags=46%, list=13%, signal=40%	DLG4/GRIK5/GRIK3/GRIK2/GNG11/GNG4
REACTOME_GLUCAGON_LIKE_PEPTIDE_1_GLP1_REGULATES_INSULIN_SECRETION	REACTOME_GLUCAGON_LIKE_PEPTIDE_1_GLP1_REGULATES_INSULIN_SECRETION	22	0.599872	1.35756	0.109027	0.689937	0.653783	1513	tags=41%, list=19%, signal=33%	KCNG2/GNG11/GNG4/GLP1R/RAPGEF4/ITPR1/ADCY8/GNG2/KCNB1
REACTOME_EUKARYOTIC_TRANSLATION_INITIATION	REACTOME_EUKARYOTIC_TRANSLATION_INITIATION	63	-0.309479	-1.16211	0.109227	0.689937	0.653783	3135	tags=59%, list=39%, signal=36%	RPL21/EIF3L/RPL9/RPS3A/EIF2S1/EIF3K/RPL14/RPL4/EIF3D/RPL32/RPS13/RPL19/RPL28/RPL7/EIF3E/EIF2B2/UBA52/RPS7/RPL37/RPL5/RPS15A/RPL15/EIF4A2/EIF3M/RPS14/RPL24/EIF5B/EIF3H/RPL23/RPS6/RPL39L/EIF3J/EIF2S2/RPS27L/RPL26L1/EIF2B3/EIF4A1
REACTOME_ER_QUALITY_CONTROL_COMPARTMENT_ERQC	REACTOME_ER_QUALITY_CONTROL_COMPARTMENT_ERQC	10	-0.571623	-1.46108	0.114286	0.710746	0.673502	2691	tags=80%, list=33%, signal=53%	UGGT1/UBA52/EDEM3/TRIM13/EDEM1/SEL1L/UGGT2/RNF103
REACTOME_SIGNALING_BY_NOTCH1	REACTOME_SIGNALING_BY_NOTCH1	49	0.519967	1.28692	0.114561	0.710746	0.673502	1186	tags=20%, list=15%, signal=18%	NEURL1/NEURL1B/DLL1/HDAC10/KAT2B/DLL4/DTX1/DNER/NBEA/HDAC11
REACTOME_SIGNALING_BY_ALK	REACTOME_SIGNALING_BY_ALK	17	-0.489771	-1.51216	0.117121	0.711852	0.674551	406	tags=35%, list=5%, signal=34%	MYCN/IL2RG/PTN/CD274/ALKAL2/ALKAL1
REACTOME_GLUCAGON_SIGNALING_IN_METABOLIC_REGULATION	REACTOME_GLUCAGON_SIGNALING_IN_METABOLIC_REGULATION	18	0.626556	1.37071	0.117861	0.711852	0.674551	2090	tags=61%, list=26%, signal=45%	ADCY2/ADCY1/GNG11/GNG4/GCGR/ADCY3/ADCY7/ADCY8/GNG2/ADCY9/ADCY6
REACTOME_GASTRULATION	REACTOME_GASTRULATION	58	0.504644	1.26513	0.117647	0.711852	0.674551	829	tags=17%, list=10%, signal=16%	SOX1/NOG/MYB/PAX6/DLL1/KAT2B/MESP2/OSR1/TEAD4/IHH
REACTOME_TRANSPORT_OF_BILE_SALTS_AND_ORGANIC_ACIDS_METAL_IONS_AND_AMINE_COMPOUNDS	REACTOME_TRANSPORT_OF_BILE_SALTS_AND_ORGANIC_ACIDS_METAL_IONS_AND_AMINE_COMPOUNDS	34	-0.378931	-1.26403	0.117324	0.711852	0.674551	1050	tags=41%, list=13%, signal=36%	SLC44A3/RUNX1/SLC30A1/HEPH/SLC6A15/SLC44A4/SLC6A7/SLC6A12/SLC39A8/SLC22A4/CP/SLC22A1/SLC11A1/RHBG
REACTOME_BLOOD_GROUP_SYSTEMS_BIOSYNTHESIS	REACTOME_BLOOD_GROUP_SYSTEMS_BIOSYNTHESIS	10	0.684079	1.35438	0.120211	0.721268	0.683473	1173	tags=50%, list=15%, signal=43%	FUT9/B3GALT2/RHCE/FUT3/ST3GAL4
REACTOME_AUF1_HNRNP_D0_BINDS_AND_DESTABILIZES_MRNA	REACTOME_AUF1_HNRNP_D0_BINDS_AND_DESTABILIZES_MRNA	27	-0.426992	-1.40178	0.122376	0.721326	0.683528	1736	tags=37%, list=22%, signal=29%	PSMA5/PSMD12/PSMA1/PSMC6/PSMB2/PSMA4/PSMA3/PSMB8/PSMA2/PSMA6
REACTOME_ACTIVATION_OF_NMDA_RECEPTORS_AND_POSTSYNAPTIC_EVENTS	REACTOME_ACTIVATION_OF_NMDA_RECEPTORS_AND_POSTSYNAPTIC_EVENTS	50	0.511569	1.27072	0.121277	0.721326	0.683528	1471	tags=30%, list=18%, signal=25%	CAMK2B/GRIA1/CAMK1/DLG4/GRIA4/NEFL/GRIA2/PPM1E/ADCY1/KIF17/NBEA/MAPT/RASGRF2/ADCY8/GRIA3
REACTOME_CELL_CYCLE_CHECKPOINTS	REACTOME_CELL_CYCLE_CHECKPOINTS	120	0.464887	1.21771	0.122594	0.721326	0.683528	1370	tags=20%, list=17%, signal=17%	SPC24/GTSE1/UBE2C/MCM10/BIRC5/CENPE/CCNA1/CENPM/CDC25A/DYNC1I1/CDC25C/CCNB2/ZWINT/CDC6/RMI2/CCNE2/SGO2/CENPO/MCM2/ANAPC15/PCBP4/SGO1/MCM5/CENPL
REACTOME_M_DECAY_DEGRADATION_OF_MATERNAL_MRNAS_BY_MATERNALLY_STORED_FACTORS	REACTOME_M_DECAY_DEGRADATION_OF_MATERNAL_MRNAS_BY_MATERNALLY_STORED_FACTORS	17	-0.482957	-1.49112	0.125427	0.723462	0.685552	2755	tags=59%, list=34%, signal=39%	CNOT10/CNOT6/CNOT8/EIF4A3/EIF4A2/CNOT7/ZFP36L2/CNOT11/ELOC/EIF4A1
REACTOME_ASSOCIATION_OF_TRIC_CCT_WITH_TARGET_PROTEINS_DURING_BIOSYNTHESIS	REACTOME_ASSOCIATION_OF_TRIC_CCT_WITH_TARGET_PROTEINS_DURING_BIOSYNTHESIS	18	-0.449212	-1.41427	0.125149	0.723462	0.685552	176	tags=11%, list=2%, signal=11%	FBXO4/CCT6B
REACTOME_SIGNALING_BY_RETINOIC_ACID	REACTOME_SIGNALING_BY_RETINOIC_ACID	22	-0.413483	-1.33208	0.12613	0.723462	0.685552	464	tags=27%, list=6%, signal=26%	RDH10/CPT1B/ALDH1A3/CRABP1/ALDH8A1/DHRS9
REACTOME_BILE_ACID_AND_BILE_SALT_METABOLISM	REACTOME_BILE_ACID_AND_BILE_SALT_METABOLISM	22	-0.41311	-1.33087	0.12613	0.723462	0.685552	668	tags=50%, list=8%, signal=46%	AKR1C3/AKR1C1/SCP2/CYP7B1/AKR1C2/SLC51A/SLC51B/CYP39A1/SLC27A2/ACOX2/ALB
REACTOME_EFFECTS_OF_PIP2_HYDROLYSIS	REACTOME_EFFECTS_OF_PIP2_HYDROLYSIS	14	0.645163	1.3605	0.128109	0.728052	0.689901	1327	tags=36%, list=16%, signal=30%	DGKB/TRPC7/RASGRP1/ITPR1/DGKG
REACTOME_FACTORS_INVOLVED_IN_MEGAKARYOCYTE_DEVELOPMENT_AND_PLATELET_PRODUCTION	REACTOME_FACTORS_INVOLVED_IN_MEGAKARYOCYTE_DEVELOPMENT_AND_PLATELET_PRODUCTION	65	0.494857	1.24742	0.128527	0.728052	0.689901	1359	tags=20%, list=17%, signal=17%	MYB/KIF20A/KIF4A/CENPE/KIF19/KIF5A/KIFC1/DOCK10/KIF26A/DOCK3/KIF6/KIF12/KLC1
REACTOME_BASE_EXCISION_REPAIR_AP_SITE_FORMATION	REACTOME_BASE_EXCISION_REPAIR_AP_SITE_FORMATION	11	0.666093	1.33894	0.13151	0.740355	0.70156	1354	tags=27%, list=17%, signal=23%	NEIL3/NEIL1/NTHL1
REACTOME_FATTY_ACYL_COA_BIOSYNTHESIS	REACTOME_FATTY_ACYL_COA_BIOSYNTHESIS	16	-0.446904	-1.3436	0.132979	0.744028	0.705041	2508	tags=69%, list=31%, signal=47%	HACD3/ACSL1/ELOVL7/ACSL4/ELOVL5/SCD5/HACD1/TECR/HSD17B12/CBR4/SLC27A2
REACTOME_RAS_ACTIVATION_UPON_CA2_INFLUX_THROUGH_NMDA_RECEPTOR	REACTOME_RAS_ACTIVATION_UPON_CA2_INFLUX_THROUGH_NMDA_RECEPTOR	10	0.675409	1.33721	0.134742	0.749299	0.710035	591	tags=30%, list=7%, signal=28%	CAMK2B/DLG4/NEFL
REACTOME_NONSENSE_MEDIATED_DECAY_NMD	REACTOME_NONSENSE_MEDIATED_DECAY_NMD	55	-0.312768	-1.15224	0.136015	0.751791	0.712396	4734	tags=95%, list=59%, signal=39%	SMG5/RPL3/RPL27A/RPL36/RPL8/RPLP2/UPF1/RPS2/MAGOH/RPS3/RPS4Y1/RPS12/RPS5/RPL11/UPF2/PNRC2/RPS20/EIF4G1/DCP1A/RPS4X/RPS16/RPL6/RPL21/RPL9/RPS3A/RPL14/RBM8A/RPL4/RPL32/RPS13/RPL19/RPL28/RPL7/GSPT1/UBA52/RPS7/RPL37/EIF4A3/RPL5/RPS15A/RPL15/ETF1/RPS14/RPL24/RPL23/RPS6/RPL39L/PPP2CA/MAGOHB/PPP2R2A/RPS27L/RPL26L1
REACTOME_EARLY_SARS_COV_2_INFECTION_EVENTS	REACTOME_EARLY_SARS_COV_2_INFECTION_EVENTS	18	-0.441392	-1.38965	0.138587	0.752331	0.712908	2093	tags=83%, list=26%, signal=62%	UVRAG/RB1/PIK3C3/CHMP3/PIK3R4/SDC2/MAP1LC3B/CHMP2B/ZCRB1/HAVCR1/TMPRSS2/ISCU/GPC3/GPC4/ACE2
REACTOME_ACTIVATION_OF_ATR_IN_RESPONSE_TO_REPLICATION_STRESS	REACTOME_ACTIVATION_OF_ATR_IN_RESPONSE_TO_REPLICATION_STRESS	15	0.632513	1.3472	0.138272	0.752331	0.712908	1363	tags=40%, list=17%, signal=33%	MCM10/CDC25A/CDC25C/CDC6/MCM2/MCM5
REACTOME_SYNAPTIC_ADHESION_LIKE_MOLECULES	REACTOME_SYNAPTIC_ADHESION_LIKE_MOLECULES	15	0.631794	1.34567	0.138272	0.752331	0.712908	1471	tags=40%, list=18%, signal=33%	GRIA1/DLG4/GRIA4/LRFN1/LRFN2/GRIA3
REACTOME_RA_BIOSYNTHESIS_PATHWAY	REACTOME_RA_BIOSYNTHESIS_PATHWAY	14	-0.490748	-1.38691	0.146549	0.773571	0.733036	721	tags=50%, list=9%, signal=46%	RDH11/RDH16/RDH10/ALDH1A3/CRABP1/ALDH8A1/DHRS9
REACTOME_INTERLEUKIN_12_FAMILY_SIGNALING	REACTOME_INTERLEUKIN_12_FAMILY_SIGNALING	23	-0.41614	-1.3541	0.147125	0.773571	0.733036	2955	tags=65%, list=37%, signal=41%	STAT3/IL6ST/PAK2/RAP1B/SOD1/SNRPA1/RALA/CAPZA1/JAK1/CANX/GSTA2/CRLF1/IL27RA/IL23A/MIF
REACTOME_THE_CANONICAL_RETINOID_CYCLE_IN_RODS_TWILIGHT_VISION	REACTOME_THE_CANONICAL_RETINOID_CYCLE_IN_RODS_TWILIGHT_VISION	12	-0.489021	-1.33862	0.146552	0.773571	0.733036	1199	tags=67%, list=15%, signal=57%	RDH11/RDH16/RDH12/NAPEPLD/TTR/RDH10/RBP4/DHRS9
REACTOME_NEPHRIN_FAMILY_INTERACTIONS	REACTOME_NEPHRIN_FAMILY_INTERACTIONS	15	0.627703	1.33696	0.144444	0.773571	0.733036	297	tags=13%, list=4%, signal=13%	ACTN3/KIRREL2
REACTOME_NEF_MEDIATES_DOWN_MODULATION_OF_CELL_SURFACE_RECEPTORS_BY_RECRUITING_THEM_TO_CLATHRIN_ADAPTERS	REACTOME_NEF_MEDIATES_DOWN_MODULATION_OF_CELL_SURFACE_RECEPTORS_BY_RECRUITING_THEM_TO_CLATHRIN_ADAPTERS	11	0.658342	1.32336	0.148438	0.773571	0.733036	142	tags=9%, list=2%, signal=9%	LCK
REACTOME_FOXO_MEDIATED_TRANSCRIPTION	REACTOME_FOXO_MEDIATED_TRANSCRIPTION	28	0.556207	1.30086	0.143508	0.773571	0.733036	441	tags=14%, list=5%, signal=14%	TRIM63/INS/GCK/KAT2B
REACTOME_BIOLOGICAL_OXIDATIONS	REACTOME_BIOLOGICAL_OXIDATIONS	81	-0.293992	-1.18592	0.147867	0.773571	0.733036	730	tags=35%, list=9%, signal=32%	MGST1/GSTA1/GLYATL1/GSTA2/MGST2/ACSS1/TPMT/MAOB/GSTK1/CYP2B6/AOC2/ACSS2/UGT2B11/GGT1/CYP2C18/MAT1A/CYP39A1/UGT3A2/PTGIS/CYP2D6/UGT2B28/NAT2/PTGS1/AKR7L/UGT2B4/CYP11A1/UGT2B10/CES3
REACTOME_ACETYLCHOLINE_NEUROTRANSMITTER_RELEASE_CYCLE	REACTOME_ACETYLCHOLINE_NEUROTRANSMITTER_RELEASE_CYCLE	10	0.670048	1.32659	0.150594	0.780353	0.739462	1528	tags=60%, list=19%, signal=49%	SNAP25/TSPOAP1/PPFIA3/RAB3A/STXBP1/STX1A
REACTOME_COOPERATION_OF_PREFOLDIN_AND_TRIC_CCT_IN_ACTIN_AND_TUBULIN_FOLDING	REACTOME_COOPERATION_OF_PREFOLDIN_AND_TRIC_CCT_IN_ACTIN_AND_TUBULIN_FOLDING	13	-0.469121	-1.30176	0.155963	0.802835	0.760766	302	tags=46%, list=4%, signal=44%	CCT8/PFDN1/PFDN4/TUBA1C/TUBAL3/CCT6B
REACTOME_REGULATION_OF_PTEN_STABILITY_AND_ACTIVITY	REACTOME_REGULATION_OF_PTEN_STABILITY_AND_ACTIVITY	34	-0.361085	-1.2045	0.156694	0.802835	0.760766	1855	tags=38%, list=23%, signal=30%	OTUD3/PSMA5/PSMD12/RNF146/PSMA1/PSMC6/PSMB2/PSMA4/PSMA3/FRK/PSMB8/PSMA2/PSMA6
REACTOME_PKA_MEDIATED_PHOSPHORYLATION_OF_CREB	REACTOME_PKA_MEDIATED_PHOSPHORYLATION_OF_CREB	14	0.626476	1.32109	0.159204	0.806633	0.764365	2090	tags=57%, list=26%, signal=42%	ADCY2/ADCY1/NBEA/ADCY3/ADCY7/ADCY8/ADCY9/ADCY6
REACTOME_NEGATIVE_REGULATION_OF_FGFR4_SIGNALING	REACTOME_NEGATIVE_REGULATION_OF_FGFR4_SIGNALING	12	0.648191	1.32028	0.158442	0.806633	0.764365	245	tags=17%, list=3%, signal=16%	FGF18/FGF9
REACTOME_NICOTINAMIDE_SALVAGING	REACTOME_NICOTINAMIDE_SALVAGING	11	0.650257	1.30711	0.164062	0.810439	0.767971	13	tags=9%, list=0%, signal=9%	SLC5A8
REACTOME_REGULATION_OF_PTEN_GENE_TRANSCRIPTION	REACTOME_REGULATION_OF_PTEN_GENE_TRANSCRIPTION	31	-0.3751	-1.23305	0.161588	0.810439	0.767971	12	tags=10%, list=0%, signal=10%	RRAGC/EGR1/NR2E1
REACTOME_ASSEMBLY_OF_COLLAGEN_FIBRILS_AND_OTHER_MULTIMERIC_STRUCTURES	REACTOME_ASSEMBLY_OF_COLLAGEN_FIBRILS_AND_OTHER_MULTIMERIC_STRUCTURES	31	-0.374322	-1.23049	0.164398	0.810439	0.767971	642	tags=29%, list=8%, signal=27%	LAMC2/ITGA6/COL4A4/LAMB3/COL9A3/COL17A1/COL11A2/CTSS/MMP13
REACTOME_SELENOAMINO_ACID_METABOLISM	REACTOME_SELENOAMINO_ACID_METABOLISM	52	-0.321897	-1.19863	0.164122	0.810439	0.767971	3391	tags=65%, list=42%, signal=38%	RPS4X/RPS16/RPL6/TXNRD1/RPL21/RPL9/RPS3A/RPL14/RPL4/RPL32/RPS13/RPL19/RPL28/RPL7/GSR/UBA52/RPS7/RPL37/RPL5/RPS15A/RPL15/PAPSS2/CTH/RPS14/RPL24/HNMT/RPL23/RPS6/RPL39L/RPS27L/RPL26L1/SCLY/AIMP1/MAT1A
REACTOME_CLEC7A_DECTIN_1_SIGNALING	REACTOME_CLEC7A_DECTIN_1_SIGNALING	57	-0.31489	-1.17632	0.161849	0.810439	0.767971	1736	tags=28%, list=22%, signal=22%	PSMA5/CHUK/PSMD12/PSMA1/PSMC6/PSMB2/PSMA4/NFATC1/SKP1/PSMA3/CASP8/BCL10/UBE2D1/PSMB8/PSMA2/PSMA6
REACTOME_RET_SIGNALING	REACTOME_RET_SIGNALING	21	0.583007	1.31111	0.168047	0.819568	0.776622	1717	tags=38%, list=21%, signal=30%	GFRA1/GFRA3/RET/ARTN/SHC3/DOK1/PRKCA/GAB2
REACTOME_MET_ACTIVATES_PTK2_SIGNALING	REACTOME_MET_ACTIVATES_PTK2_SIGNALING	18	-0.399382	-1.25739	0.167598	0.819568	0.776622	1166	tags=39%, list=14%, signal=33%	COL1A1/ITGB1/LAMC2/LAMB3/ITGA3/COL11A2/LAMA2
REACTOME_SIGNALING_BY_FGFR1	REACTOME_SIGNALING_BY_FGFR1	20	0.586027	1.30802	0.172619	0.834682	0.790944	245	tags=10%, list=3%, signal=10%	FGF18/FGF9
REACTOME_SIGNALING_BY_FGFR4	REACTOME_SIGNALING_BY_FGFR4	16	0.605897	1.30792	0.175676	0.834682	0.790944	245	tags=12%, list=3%, signal=12%	FGF18/FGF9
REACTOME_VASOPRESSIN_REGULATES_RENAL_WATER_HOMEOSTASIS_VIA_AQUAPORINS	REACTOME_VASOPRESSIN_REGULATES_RENAL_WATER_HOMEOSTASIS_VIA_AQUAPORINS	19	0.58955	1.30118	0.175692	0.834682	0.790944	2226	tags=58%, list=28%, signal=42%	ADCY2/ADCY1/GNG11/GNG4/ADCY3/ADCY7/ADCY8/GNG2/ADCY9/ADCY6/RAB11FIP2
REACTOME_COBALAMIN_CBL_VITAMIN_B12_TRANSPORT_AND_METABOLISM	REACTOME_COBALAMIN_CBL_VITAMIN_B12_TRANSPORT_AND_METABOLISM	13	-0.463207	-1.28535	0.174312	0.834682	0.790944	1289	tags=46%, list=16%, signal=39%	MMAA/PRSS1/LMBRD1/AMN/PRSS3/TCN1
REACTOME_SIGNALING_BY_FGFR_IN_DISEASE	REACTOME_SIGNALING_BY_FGFR_IN_DISEASE	24	0.557356	1.27804	0.175723	0.834682	0.790944	245	tags=8%, list=3%, signal=8%	FGF18/FGF9
REACTOME_TRANSCRIPTIONAL_ACTIVATION_OF_MITOCHONDRIAL_BIOGENESIS	REACTOME_TRANSCRIPTIONAL_ACTIVATION_OF_MITOCHONDRIAL_BIOGENESIS	21	-0.422738	-1.36035	0.194396	0.840201	0.796174	1371	tags=29%, list=17%, signal=24%	GLUD1/GABPA/ACSS2/MEF2C/GLUD2/PERM1
REACTOME_SYNTHESIS_OF_GLYCOSYLPHOSPHATIDYLINOSITOL_GPI	REACTOME_SYNTHESIS_OF_GLYCOSYLPHOSPHATIDYLINOSITOL_GPI	10	-0.519056	-1.32672	0.187755	0.840201	0.796174	2170	tags=80%, list=27%, signal=58%	PIGO/PIGP/PIGV/PIGZ/PIGB/PIGA/PIGX/PIGG
REACTOME_GLUTAMATE_NEUROTRANSMITTER_RELEASE_CYCLE	REACTOME_GLUTAMATE_NEUROTRANSMITTER_RELEASE_CYCLE	16	0.601652	1.29876	0.18059	0.840201	0.796174	1528	tags=44%, list=19%, signal=36%	SNAP25/TSPOAP1/GLS2/PPFIA3/RAB3A/STXBP1/STX1A
REACTOME_DISEASES_OF_DNA_REPAIR	REACTOME_DISEASES_OF_DNA_REPAIR	16	0.600946	1.29724	0.184275	0.840201	0.796174	839	tags=19%, list=10%, signal=17%	NEIL3/NEIL1/RMI2
REACTOME_ACTIVATION_OF_THE_PRE_REPLICATIVE_COMPLEX	REACTOME_ACTIVATION_OF_THE_PRE_REPLICATIVE_COMPLEX	16	0.600879	1.29709	0.184275	0.840201	0.796174	1955	tags=50%, list=24%, signal=38%	MCM10/CDC6/MCM2/CDT1/MCM5/POLA2/MCM8/POLE
REACTOME_ADORA2B_MEDIATED_ANTI_INFLAMMATORY_CYTOKINES_PRODUCTION	REACTOME_ADORA2B_MEDIATED_ANTI_INFLAMMATORY_CYTOKINES_PRODUCTION	21	0.575287	1.29376	0.182249	0.840201	0.796174	2090	tags=52%, list=26%, signal=39%	GNAZ/ADCY2/ADCY1/GNG11/GNG4/ADCY3/ADCY7/ADCY8/GNG2/ADCY9/ADCY6
REACTOME_CYCLIN_A_B1_B2_ASSOCIATED_EVENTS_DURING_G2_M_TRANSITION	REACTOME_CYCLIN_A_B1_B2_ASSOCIATED_EVENTS_DURING_G2_M_TRANSITION	15	0.60609	1.29092	0.191358	0.840201	0.796174	1157	tags=33%, list=14%, signal=29%	CCNA1/CDC25A/CDC25C/CCNB2/CDC25B
REACTOME_REGULATION_OF_HOMOTYPIC_CELL_CELL_ADHESION	REACTOME_REGULATION_OF_HOMOTYPIC_CELL_CELL_ADHESION	14	0.611705	1.28995	0.187811	0.840201	0.796174	362	tags=14%, list=4%, signal=14%	PRDM8/CDH8
REACTOME_SIGNALING_BY_FGFR2	REACTOME_SIGNALING_BY_FGFR2	23	0.563945	1.28804	0.182135	0.840201	0.796174	245	tags=9%, list=3%, signal=8%	FGF18/FGF9
REACTOME_SIGNALING_BY_KIT_IN_DISEASE	REACTOME_SIGNALING_BY_KIT_IN_DISEASE	12	0.632283	1.28787	0.18961	0.840201	0.796174	142	tags=8%, list=2%, signal=8%	LCK
REACTOME_INTERLEUKIN_37_SIGNALING	REACTOME_INTERLEUKIN_37_SIGNALING	12	-0.468418	-1.28222	0.193966	0.840201	0.796174	27	tags=25%, list=0%, signal=25%	TBK1/PTPN13/CASP1
REACTOME_ION_TRANSPORT_BY_P_TYPE_ATPASES	REACTOME_ION_TRANSPORT_BY_P_TYPE_ATPASES	28	0.538568	1.2596	0.191344	0.840201	0.796174	1058	tags=25%, list=13%, signal=22%	CAMK2B/FXYD6/PLN/ATP2A3/ATP2B2/ATP8B3/ATP8A1
REACTOME_DEADENYLATION_OF_MRNA	REACTOME_DEADENYLATION_OF_MRNA	17	-0.398254	-1.2296	0.187845	0.840201	0.796174	2755	tags=53%, list=34%, signal=35%	CNOT10/CNOT6/CNOT8/EIF4A3/EIF4A2/CNOT7/PAN3/CNOT11/EIF4A1
REACTOME_RESOLUTION_OF_SISTER_CHROMATID_COHESION	REACTOME_RESOLUTION_OF_SISTER_CHROMATID_COHESION	51	0.490509	1.2191	0.189563	0.840201	0.796174	1370	tags=22%, list=17%, signal=18%	SPC24/BIRC5/CENPE/CENPM/DYNC1I1/CCNB2/ZWINT/SGO2/CENPO/SGO1/CENPL
REACTOME_PROTEIN_PROTEIN_INTERACTIONS_AT_SYNAPSES	REACTOME_PROTEIN_PROTEIN_INTERACTIONS_AT_SYNAPSES	45	0.494454	1.21366	0.190733	0.840201	0.796174	1811	tags=42%, list=23%, signal=33%	GRIA1/NRXN2/DLG4/GRIA4/IL1RAPL1/NTRK3/PPFIA3/SYT2/NRXN3/LRFN1/NLGN3/DLGAP3/LRFN2/STXBP1/GRIA3/STX1A/APBA2/HOMER3/SYT7
REACTOME_ESR_MEDIATED_SIGNALING	REACTOME_ESR_MEDIATED_SIGNALING	71	0.470834	1.1941	0.19267	0.840201	0.796174	457	tags=8%, list=6%, signal=8%	PGR/MYB/MMP2/CXCL12/KAT2B/BCL2
REACTOME_PLASMA_LIPOPROTEIN_ASSEMBLY_REMODELING_AND_CLEARANCE	REACTOME_PLASMA_LIPOPROTEIN_ASSEMBLY_REMODELING_AND_CLEARANCE	31	-0.361581	-1.18861	0.19531	0.840201	0.796174	1191	tags=39%, list=15%, signal=33%	APOA1/NPC2/NCEH1/SCARB1/MTTP/LIPA/LIPC/A2M/AMN/PCSK6/ALB/CES3
REACTOME_SIGNALING_BY_THE_B_CELL_RECEPTOR_BCR	REACTOME_SIGNALING_BY_THE_B_CELL_RECEPTOR_BCR	53	-0.312392	-1.16676	0.187623	0.840201	0.796174	1736	tags=30%, list=22%, signal=24%	PSMA5/CHUK/PSMD12/PSMA1/PSMC6/PSMB2/PSMA4/NFATC1/SKP1/PSMA3/NCK1/BCL10/PSMB8/PSMA2/PSMA6/BLNK
REACTOME_PTEN_REGULATION	REACTOME_PTEN_REGULATION	69	-0.284838	-1.11136	0.193515	0.840201	0.796174	1554	tags=20%, list=19%, signal=17%	PSMD12/RNF146/PSMA1/PSMC6/PSMB2/PSMA4/RRAGC/PSMA3/FRK/EGR1/PSMB8/PSMA2/PSMA6/NR2E1
REACTOME_RESPIRATORY_ELECTRON_TRANSPORT	REACTOME_RESPIRATORY_ELECTRON_TRANSPORT	75	-0.273339	-1.07375	0.192111	0.840201	0.796174	2659	tags=52%, list=33%, signal=35%	NDUFV3/OXA1L/COX11/SFXN4/UQCRB/HIGD2A/NDUFA2/COX4I1/COX6C/NDUFA4/NDUFS5/NDUFA6/SDHD/TMEM126B/COX15/MDH1/CYCS/NDUFA5/NDUFA10/TTC19/UQCRH/TIMMDC1/NDUFS4/NDUFC2/NDUFAF2/NDUFB6/ETFDH/COQ10B/NUBPL/COX18/COX17/GOT2/HIGD1A/ISCU/NDUFAF4/NDUFA9/COX16/NDUFV2/NDUFA7
REACTOME_CELL_CELL_JUNCTION_ORGANIZATION	REACTOME_CELL_CELL_JUNCTION_ORGANIZATION	35	0.51632	1.24278	0.19779	0.846876	0.802499	1465	tags=26%, list=18%, signal=21%	PRDM8/CDH18/CDH8/CLDN11/CLDN19/SDK1/PARD6A/SDK2/CDH6
REACTOME_CONSTITUTIVE_SIGNALING_BY_ABERRANT_PI3K_IN_CANCER	REACTOME_CONSTITUTIVE_SIGNALING_BY_ABERRANT_PI3K_IN_CANCER	26	0.539947	1.24881	0.200461	0.8543	0.809534	723	tags=19%, list=9%, signal=18%	LCK/FGF18/FGF9/NRG3/NTRK3
REACTOME_DEADENYLATION_DEPENDENT_MRNA_DECAY	REACTOME_DEADENYLATION_DEPENDENT_MRNA_DECAY	30	-0.389749	-1.28545	0.202641	0.859573	0.814531	2755	tags=57%, list=34%, signal=37%	CNOT10/CNOT6/EXOSC3/CNOT8/LSM3/EIF4A3/EXOSC1/HBS1L/EIF4A2/CNOT7/XRN1/PAN3/LSM5/LSM1/CNOT11/EXOSC7/EIF4A1
REACTOME_OTHER_INTERLEUKIN_SIGNALING	REACTOME_OTHER_INTERLEUKIN_SIGNALING	11	0.638259	1.28299	0.204427	0.863137	0.817908	385	tags=18%, list=5%, signal=17%	SNAP25/PTPRZ1
REACTOME_NOD1_2_SIGNALING_PATHWAY	REACTOME_NOD1_2_SIGNALING_PATHWAY	23	-0.369897	-1.20362	0.207143	0.870573	0.824954	961	tags=22%, list=12%, signal=19%	CASP2/BIRC3/CASP8/CASP4/CASP1
REACTOME_RESPONSE_OF_EIF2AK4_GCN2_TO_AMINO_ACID_DEFICIENCY	REACTOME_RESPONSE_OF_EIF2AK4_GCN2_TO_AMINO_ACID_DEFICIENCY	47	-0.334845	-1.19593	0.210904	0.882316	0.836082	4667	tags=96%, list=58%, signal=40%	RPL3/RPL27A/RPL36/GCN1/RPL8/RPLP2/RPS2/RPS3/RPS4Y1/RPS12/RPS5/RPL11/RPS20/IMPACT/RPS4X/RPS16/RPL6/EIF2AK4/RPL21/RPL9/RPS3A/ATF4/EIF2S1/RPL14/RPL4/RPL32/RPS13/RPL19/RPL28/RPL7/UBA52/RPS7/RPL37/RPL5/RPS15A/RPL15/CEBPG/RPS14/RPL24/RPL23/RPS6/RPL39L/EIF2S2/RPS27L/RPL26L1
REACTOME_CREB1_PHOSPHORYLATION_THROUGH_NMDA_RECEPTOR_MEDIATED_ACTIVATION_OF_RAS_SIGNALING	REACTOME_CREB1_PHOSPHORYLATION_THROUGH_NMDA_RECEPTOR_MEDIATED_ACTIVATION_OF_RAS_SIGNALING	15	0.594844	1.26697	0.21358	0.883193	0.836913	591	tags=20%, list=7%, signal=19%	CAMK2B/DLG4/NEFL
REACTOME_IRS_MEDIATED_SIGNALLING	REACTOME_IRS_MEDIATED_SIGNALLING	16	0.586006	1.26499	0.214988	0.883193	0.836913	245	tags=12%, list=3%, signal=12%	FGF18/FGF9
REACTOME_SIGNALING_BY_TYPE_1_INSULIN_LIKE_GROWTH_FACTOR_1_RECEPTOR_IGF1R	REACTOME_SIGNALING_BY_TYPE_1_INSULIN_LIKE_GROWTH_FACTOR_1_RECEPTOR_IGF1R	16	0.586006	1.26499	0.214988	0.883193	0.836913	245	tags=12%, list=3%, signal=12%	FGF18/FGF9
REACTOME_PKA_ACTIVATION_IN_GLUCAGON_SIGNALLING	REACTOME_PKA_ACTIVATION_IN_GLUCAGON_SIGNALLING	12	0.618823	1.26046	0.214286	0.883193	0.836913	2090	tags=58%, list=26%, signal=43%	ADCY2/ADCY1/ADCY3/ADCY7/ADCY8/ADCY9/ADCY6
REACTOME_DEGRADATION_OF_THE_EXTRACELLULAR_MATRIX	REACTOME_DEGRADATION_OF_THE_EXTRACELLULAR_MATRIX	66	0.466699	1.17998	0.222571	0.910244	0.862546	1147	tags=32%, list=14%, signal=28%	ADAMTS8/COL19A1/COL13A1/COL9A1/MMP2/FBN1/SPOCK3/SPP1/COL25A1/MMP19/COL16A1/ACAN/FBN3/COL4A6/ADAM8/CAPN10/SCUBE3/CAPN12/COL1A2/COL12A1/COL9A2
REACTOME_CHEMOKINE_RECEPTORS_BIND_CHEMOKINES	REACTOME_CHEMOKINE_RECEPTORS_BIND_CHEMOKINES	13	0.602228	1.25318	0.228316	0.925977	0.877455	609	tags=38%, list=8%, signal=36%	CXCL12/CX3CL1/CXCL6/CXCL1/CXCL8
REACTOME_RNA_POLYMERASE_I_PROMOTER_ESCAPE	REACTOME_RNA_POLYMERASE_I_PROMOTER_ESCAPE	12	-0.449963	-1.2317	0.228448	0.925977	0.877455	4432	tags=100%, list=55%, signal=45%	POLR1A/TAF1C/GTF2H2/MNAT1/POLR1D/TAF1A/TBP/GTF2H1/TAF1D/CBX3/CCNH
REACTOME_CROSSLINKING_OF_COLLAGEN_FIBRILS	REACTOME_CROSSLINKING_OF_COLLAGEN_FIBRILS	10	0.631287	1.24985	0.229855	0.927555	0.878951	1935	tags=80%, list=24%, signal=61%	LOXL3/COL4A6/LOXL2/COL1A2/COL4A1/COL4A2/COL4A5/LOXL4
REACTOME_N_GLYCAN_ANTENNAE_ELONGATION_IN_THE_MEDIAL_TRANS_GOLGI	REACTOME_N_GLYCAN_ANTENNAE_ELONGATION_IN_THE_MEDIAL_TRANS_GOLGI	16	0.58092	1.25401	0.232187	0.928747	0.88008	1173	tags=25%, list=15%, signal=21%	MGAT4C/CHST8/FUT3/ST3GAL4
REACTOME_MITOPHAGY	REACTOME_MITOPHAGY	25	-0.359465	-1.1828	0.231343	0.928747	0.88008	2930	tags=64%, list=36%, signal=41%	TOMM20/TOMM22/UBE2N/VDAC1/UBA52/OPTN/UBE2L3/MFN1/TOMM70/ATG5/TBK1/MAP1LC3B/PRKN/FUNDC1/VDAC2/MTERF3
REACTOME_TP53_REGULATES_TRANSCRIPTION_OF_CELL_CYCLE_GENES	REACTOME_TP53_REGULATES_TRANSCRIPTION_OF_CELL_CYCLE_GENES	23	0.543553	1.24146	0.234339	0.933262	0.884358	1265	tags=26%, list=16%, signal=22%	CCNA1/CDC25C/E2F1/AURKA/CCNE2/PCBP4
REACTOME_SIGNALING_BY_ROBO_RECEPTORS	REACTOME_SIGNALING_BY_ROBO_RECEPTORS	110	0.439136	1.14894	0.238143	0.940202	0.890935	676	tags=7%, list=8%, signal=7%	LHX4/LHX3/CXCL12/SLIT1/ISL1/DCC/NELL2/SLIT2
REACTOME_MAPK_FAMILY_SIGNALING_CASCADES	REACTOME_MAPK_FAMILY_SIGNALING_CASCADES	161	0.424837	1.12194	0.237425	0.940202	0.890935	1305	tags=17%, list=16%, signal=15%	VWF/MMP2/CAMK2B/GFRA1/NCAM1/GFRA3/FGF18/FGF9/NRG3/RASA4/DLG4/RET/NEFL/ARTN/DUSP2/KSR2/RASGRP1/RASA3/SPTBN4/SPRED3/DUSP9/SHC3/CDC42EP5/SPTB/ITGB3/RASGRF2/IL17RD/SYNGAP1
REACTOME_NEGATIVE_REGULATION_OF_THE_PI3K_AKT_NETWORK	REACTOME_NEGATIVE_REGULATION_OF_THE_PI3K_AKT_NETWORK	48	0.476799	1.17905	0.239829	0.942775	0.893373	262	tags=10%, list=3%, signal=10%	LCK/FGF18/FGF9/INS/NRG3
REACTOME_DEFECTS_IN_VITAMIN_AND_COFACTOR_METABOLISM	REACTOME_DEFECTS_IN_VITAMIN_AND_COFACTOR_METABOLISM	10	-0.489819	-1.25199	0.244898	0.949795	0.900025	1943	tags=60%, list=24%, signal=46%	MMADHC/BTD/PC/MMAA/LMBRD1/AMN
REACTOME_GPER1_SIGNALING	REACTOME_GPER1_SIGNALING	23	0.537572	1.2278	0.24594	0.949795	0.900025	1510	tags=39%, list=19%, signal=32%	GNAZ/ADCY2/ADCY1/GNG11/GNG4/ADCY3/ADCY7/ADCY8/GNG2
REACTOME_METAL_ION_SLC_TRANSPORTERS	REACTOME_METAL_ION_SLC_TRANSPORTERS	11	-0.46112	-1.22559	0.247863	0.949795	0.900025	941	tags=45%, list=12%, signal=40%	SLC30A1/HEPH/SLC39A8/CP/SLC11A1
REACTOME_EPH_EPHRIN_MEDIATED_REPULSION_OF_CELLS	REACTOME_EPH_EPHRIN_MEDIATED_REPULSION_OF_CELLS	32	0.506125	1.21376	0.247216	0.949795	0.900025	1688	tags=25%, list=21%, signal=20%	MMP2/TIAM1/EPHA7/DNM1/EPHA5/EPHA8/FYN/EFNB3
REACTOME_PARACETAMOL_ADME	REACTOME_PARACETAMOL_ADME	11	-0.452281	-1.2021	0.247863	0.949795	0.900025	986	tags=27%, list=12%, signal=24%	ABCC4/GGT1/NAT2
REACTOME_SMOOTH_MUSCLE_CONTRACTION	REACTOME_SMOOTH_MUSCLE_CONTRACTION	18	-0.367633	-1.15744	0.24581	0.949795	0.900025	192	tags=17%, list=2%, signal=16%	MYL12B/ACTG2/MYH11
REACTOME_REGULATION_OF_EXPRESSION_OF_SLITS_AND_ROBOS	REACTOME_REGULATION_OF_EXPRESSION_OF_SLITS_AND_ROBOS	81	0.451285	1.15361	0.250777	0.956941	0.906796	283	tags=5%, list=4%, signal=5%	LHX4/LHX3/SLIT1/ISL1
REACTOME_REGULATION_OF_KIT_SIGNALING	REACTOME_REGULATION_OF_KIT_SIGNALING	11	0.611506	1.22921	0.255208	0.969792	0.918974	1751	tags=36%, list=22%, signal=28%	LCK/FYN/PRKCA/SOCS1
REACTOME_SENSORY_PERCEPTION_OF_TASTE	REACTOME_SENSORY_PERCEPTION_OF_TASTE	12	0.59856	1.21918	0.261039	0.987832	0.936069	1243	tags=58%, list=15%, signal=49%	CALHM3/TAS2R5/TRPM5/SCN3A/SCN9A/KCNJ2/SCN1B
REACTOME_INTEGRIN_CELL_SURFACE_INTERACTIONS	REACTOME_INTEGRIN_CELL_SURFACE_INTERACTIONS	43	0.477338	1.1667	0.264355	0.996248	0.944044	1385	tags=35%, list=17%, signal=29%	VWF/COL13A1/COL9A1/ITGA4/FBN1/SPP1/COL16A1/COL4A6/MADCAM1/COL1A2/COL9A2/ITGB3/COL4A1/THBS1/COL4A2
REACTOME_RESOLUTION_OF_D_LOOP_STRUCTURES	REACTOME_RESOLUTION_OF_D_LOOP_STRUCTURES	11	0.60591	1.21796	0.268229	1	0.947599	2303	tags=64%, list=29%, signal=45%	RTEL1/RMI2/XRCC3/EME1/SPIDR/KAT5/SLX4
REACTOME_NITRIC_OXIDE_STIMULATES_GUANYLATE_CYCLASE	REACTOME_NITRIC_OXIDE_STIMULATES_GUANYLATE_CYCLASE	12	0.594915	1.21176	0.271429	1	0.947599	1570	tags=58%, list=20%, signal=47%	PDE1B/PDE10A/PDE2A/KCNMB4/ITPR1/PDE9A/NOS2
REACTOME_SURFACTANT_METABOLISM	REACTOME_SURFACTANT_METABOLISM	11	0.601956	1.21002	0.27474	1	0.947599	1460	tags=55%, list=18%, signal=45%	PGA5/ADORA2A/ABCA3/ADRA2C/LMCD1/P2RY2
REACTOME_CARBOXYTERMINAL_POST_TRANSLATIONAL_MODIFICATIONS_OF_TUBULIN	REACTOME_CARBOXYTERMINAL_POST_TRANSLATIONAL_MODIFICATIONS_OF_TUBULIN	17	0.55332	1.20844	0.269184	1	0.947599	959	tags=24%, list=12%, signal=21%	TTLL10/LRRC49/AGBL2/VASH1
REACTOME_CTLA4_INHIBITORY_SIGNALING	REACTOME_CTLA4_INHIBITORY_SIGNALING	13	0.580705	1.20839	0.279337	1	0.947599	142	tags=8%, list=2%, signal=8%	LCK
REACTOME_FORMATION_OF_THE_BETA_CATENIN_TCF_TRANSACTIVATING_COMPLEX	REACTOME_FORMATION_OF_THE_BETA_CATENIN_TCF_TRANSACTIVATING_COMPLEX	22	0.52541	1.18904	0.286049	1	0.947599	2323	tags=45%, list=29%, signal=32%	TERT/AXIN2/TCF4/KMT2D/TRRAP/TCF7/MEN1/KAT5/TCF7L1/TLE2
REACTOME_NOTCH3_INTRACELLULAR_DOMAIN_REGULATES_TRANSCRIPTION	REACTOME_NOTCH3_INTRACELLULAR_DOMAIN_REGULATES_TRANSCRIPTION	14	0.561416	1.1839	0.310945	1	0.947599	441	tags=14%, list=5%, signal=14%	FABP7/KAT2B
REACTOME_ACTIVATION_OF_SMO	REACTOME_ACTIVATION_OF_SMO	13	0.568361	1.18271	0.302296	1	0.947599	1343	tags=38%, list=17%, signal=32%	GAS1/IHH/BOC/PTCH1/EVC
REACTOME_CGMP_EFFECTS	REACTOME_CGMP_EFFECTS	11	0.586554	1.17905	0.303385	1	0.947599	1565	tags=55%, list=19%, signal=44%	PDE1B/PDE10A/PDE2A/KCNMB4/ITPR1/PDE9A
REACTOME_CHONDROITIN_SULFATE_DERMATAN_SULFATE_METABOLISM	REACTOME_CHONDROITIN_SULFATE_DERMATAN_SULFATE_METABOLISM	21	0.523133	1.17647	0.294675	1	0.947599	849	tags=19%, list=11%, signal=17%	B3GAT2/NCAN/B3GAT1/UST
REACTOME_ASSEMBLY_AND_CELL_SURFACE_PRESENTATION_OF_NMDA_RECEPTORS	REACTOME_ASSEMBLY_AND_CELL_SURFACE_PRESENTATION_OF_NMDA_RECEPTORS	18	0.537727	1.17638	0.291616	1	0.947599	1033	tags=28%, list=13%, signal=24%	CAMK2B/DLG4/NEFL/KIF17/NBEA
REACTOME_TRANSCRIPTIONAL_REGULATION_OF_GRANULOPOIESIS	REACTOME_TRANSCRIPTIONAL_REGULATION_OF_GRANULOPOIESIS	13	0.564403	1.17447	0.311224	1	0.947599	771	tags=15%, list=10%, signal=14%	MYB/E2F1
REACTOME_NEGATIVE_REGULATION_OF_FGFR1_SIGNALING	REACTOME_NEGATIVE_REGULATION_OF_FGFR1_SIGNALING	10	0.592155	1.17238	0.309115	1	0.947599	245	tags=10%, list=3%, signal=10%	FGF9
REACTOME_KERATINIZATION	REACTOME_KERATINIZATION	14	0.554791	1.16993	0.322139	1	0.947599	496	tags=21%, list=6%, signal=20%	EVPL/KRT81/KRTAP5-1
REACTOME_DEPOSITION_OF_NEW_CENPA_CONTAINING_NUCLEOSOMES_AT_THE_CENTROMERE	REACTOME_DEPOSITION_OF_NEW_CENPA_CONTAINING_NUCLEOSOMES_AT_THE_CENTROMERE	12	0.571878	1.16484	0.311688	1	0.947599	1631	tags=42%, list=20%, signal=33%	CENPM/CENPO/CENPL/CENPW/OIP5
REACTOME_MYOGENESIS	REACTOME_MYOGENESIS	18	0.531214	1.16213	0.308627	1	0.947599	1588	tags=28%, list=20%, signal=22%	NTN3/MAP2K6/BOC/TCF4/MAPK11
REACTOME_SIALIC_ACID_METABOLISM	REACTOME_SIALIC_ACID_METABOLISM	15	0.543425	1.15745	0.330864	1	0.947599	237	tags=13%, list=3%, signal=13%	ST8SIA1/ST8SIA5
REACTOME_DEACTIVATION_OF_THE_BETA_CATENIN_TRANSACTIVATING_COMPLEX	REACTOME_DEACTIVATION_OF_THE_BETA_CATENIN_TRANSACTIVATING_COMPLEX	21	0.513601	1.15503	0.305325	1	0.947599	18	tags=5%, list=0%, signal=5%	SRY
REACTOME_BASE_EXCISION_REPAIR	REACTOME_BASE_EXCISION_REPAIR	22	0.509096	1.15213	0.313013	1	0.947599	2094	tags=32%, list=26%, signal=24%	NEIL3/NEIL1/NTHL1/XRCC1/PNKP/POLE/POLD1
REACTOME_WNT_LIGAND_BIOGENESIS_AND_TRAFFICKING	REACTOME_WNT_LIGAND_BIOGENESIS_AND_TRAFFICKING	10	0.58177	1.15182	0.331572	1	0.947599	1423	tags=40%, list=18%, signal=33%	WNT7B/WNT9A/PORCN/WNT11
REACTOME_DEFECTIVE_INTRINSIC_PATHWAY_FOR_APOPTOSIS	REACTOME_DEFECTIVE_INTRINSIC_PATHWAY_FOR_APOPTOSIS	10	0.581059	1.15041	0.332893	1	0.947599	1157	tags=30%, list=14%, signal=26%	CDC25A/CDC25C/CDC25B
REACTOME_RUNX1_REGULATES_GENES_INVOLVED_IN_MEGAKARYOCYTE_DIFFERENTIATION_AND_PLATELET_FUNCTION	REACTOME_RUNX1_REGULATES_GENES_INVOLVED_IN_MEGAKARYOCYTE_DIFFERENTIATION_AND_PLATELET_FUNCTION	19	0.521065	1.15003	0.311673	1	0.947599	2554	tags=58%, list=32%, signal=40%	KAT2B/NR4A3/THBS1/KMT2D/ZFPM1/KMT2B/AGO4/SETD1B/PRMT6/TNRC6C/KMT2A
REACTOME_NOREPINEPHRINE_NEUROTRANSMITTER_RELEASE_CYCLE	REACTOME_NOREPINEPHRINE_NEUROTRANSMITTER_RELEASE_CYCLE	11	0.572027	1.14985	0.333333	1	0.947599	1528	tags=55%, list=19%, signal=44%	SNAP25/TSPOAP1/PPFIA3/RAB3A/STXBP1/STX1A
REACTOME_GENERATION_OF_SECOND_MESSENGER_MOLECULES	REACTOME_GENERATION_OF_SECOND_MESSENGER_MOLECULES	13	0.551205	1.14701	0.336735	1	0.947599	1020	tags=38%, list=13%, signal=34%	LCK/HLA-DQA2/WAS/ZAP70/HLA-DQB1
REACTOME_CARGO_TRAFFICKING_TO_THE_PERICILIARY_MEMBRANE	REACTOME_CARGO_TRAFFICKING_TO_THE_PERICILIARY_MEMBRANE	25	0.49786	1.1466	0.312212	1	0.947599	2263	tags=36%, list=28%, signal=26%	SSTR3/BBS1/CNGA4/PKD1/INPP5E/ARL13B/SMO/RAB11FIP3/PDE6D
REACTOME_CD28_DEPENDENT_PI3K_AKT_SIGNALING	REACTOME_CD28_DEPENDENT_PI3K_AKT_SIGNALING	14	0.542712	1.14446	0.348259	1	0.947599	142	tags=7%, list=2%, signal=7%	LCK
REACTOME_PLATELET_SENSITIZATION_BY_LDL	REACTOME_PLATELET_SENSITIZATION_BY_LDL	11	-0.429164	-1.14066	0.290598	1	0.947599	1720	tags=64%, list=21%, signal=50%	PPP2R5C/PPP2R1B/PPP2R5A/PPP2CB/APOB/PPP2CA/PECAM1
REACTOME_REGULATION_OF_RUNX2_EXPRESSION_AND_ACTIVITY	REACTOME_REGULATION_OF_RUNX2_EXPRESSION_AND_ACTIVITY	34	-0.341713	-1.13988	0.294737	1	0.947599	1736	tags=35%, list=22%, signal=28%	PSMA5/PSMD12/PSMA1/WWP1/PSMC6/PSMB2/PSMA4/SKP1/PSMA3/PSMB8/PSMA2/PSMA6
REACTOME_SIGNALING_BY_INSULIN_RECEPTOR	REACTOME_SIGNALING_BY_INSULIN_RECEPTOR	32	0.475036	1.1392	0.330735	1	0.947599	612	tags=12%, list=8%, signal=12%	FGF18/FGF9/INS/ATP6V1G2
REACTOME_ACTIVATION_OF_ANTERIOR_HOX_GENES_IN_HINDBRAIN_DEVELOPMENT_DURING_EARLY_EMBRYOGENESIS	REACTOME_ACTIVATION_OF_ANTERIOR_HOX_GENES_IN_HINDBRAIN_DEVELOPMENT_DURING_EARLY_EMBRYOGENESIS	22	0.503266	1.13893	0.327081	1	0.947599	1382	tags=23%, list=17%, signal=19%	PAX6/HOXA1/PAGR1/MAFB/KMT2D
REACTOME_AQUAPORIN_MEDIATED_TRANSPORT	REACTOME_AQUAPORIN_MEDIATED_TRANSPORT	21	0.504732	1.13508	0.326627	1	0.947599	2453	tags=57%, list=30%, signal=40%	ADCY2/ADCY1/GNG11/GNG4/ADCY3/ADCY7/ADCY8/GNG2/ADCY9/ADCY6/RAB11FIP2/AQP7
REACTOME_THE_ROLE_OF_NEF_IN_HIV_1_REPLICATION_AND_DISEASE_PATHOGENESIS	REACTOME_THE_ROLE_OF_NEF_IN_HIV_1_REPLICATION_AND_DISEASE_PATHOGENESIS	15	0.532119	1.13337	0.360494	1	0.947599	142	tags=7%, list=2%, signal=7%	LCK
REACTOME_DNA_STRAND_ELONGATION	REACTOME_DNA_STRAND_ELONGATION	12	0.556007	1.13251	0.345455	1	0.947599	2094	tags=58%, list=26%, signal=43%	GINS2/MCM2/MCM5/GINS1/POLA2/MCM8/POLD1
REACTOME_NICOTINATE_METABOLISM	REACTOME_NICOTINATE_METABOLISM	18	0.517567	1.13227	0.351154	1	0.947599	13	tags=6%, list=0%, signal=6%	SLC5A8
REACTOME_HEPARAN_SULFATE_HEPARIN_HS_GAG_METABOLISM	REACTOME_HEPARAN_SULFATE_HEPARIN_HS_GAG_METABOLISM	21	0.502983	1.13115	0.331361	1	0.947599	1310	tags=24%, list=16%, signal=20%	B3GAT2/NCAN/B3GAT1/HS3ST1/SDC3
REACTOME_CYTOCHROME_P450_ARRANGED_BY_SUBSTRATE_TYPE	REACTOME_CYTOCHROME_P450_ARRANGED_BY_SUBSTRATE_TYPE	18	-0.358816	-1.12968	0.284916	1	0.947599	699	tags=33%, list=9%, signal=31%	CYP2B6/CYP2C18/CYP39A1/PTGIS/CYP2D6/CYP11A1
REACTOME_ECM_PROTEOGLYCANS	REACTOME_ECM_PROTEOGLYCANS	32	0.470518	1.12837	0.344098	1	0.947599	1651	tags=38%, list=21%, signal=30%	COL9A1/NCAM1/NCAN/ACAN/COL4A6/COL1A2/COL9A2/ITGB3/COL4A1/COL4A2/TNXB/COL4A5
REACTOME_MET_PROMOTES_CELL_MOTILITY	REACTOME_MET_PROMOTES_CELL_MOTILITY	25	-0.342903	-1.1283	0.283582	1	0.947599	1174	tags=32%, list=15%, signal=27%	RAP1A/COL1A1/ITGB1/LAMC2/LAMB3/ITGA3/COL11A2/LAMA2
REACTOME_DISEASES_OF_MITOTIC_CELL_CYCLE	REACTOME_DISEASES_OF_MITOTIC_CELL_CYCLE	18	0.515459	1.12766	0.352369	1	0.947599	1260	tags=22%, list=16%, signal=19%	UBE2C/E2F1/CCNE2/ANAPC15
REACTOME_COPI_DEPENDENT_GOLGI_TO_ER_RETROGRADE_TRAFFIC	REACTOME_COPI_DEPENDENT_GOLGI_TO_ER_RETROGRADE_TRAFFIC	50	0.450341	1.11863	0.341489	1	0.947599	1359	tags=20%, list=17%, signal=17%	KIF20A/KIF4A/CENPE/KIF19/KIF5A/KIFC1/KIF26A/KIF6/KIF12/KLC1
REACTOME_FGFR1_MUTANT_RECEPTOR_ACTIVATION	REACTOME_FGFR1_MUTANT_RECEPTOR_ACTIVATION	13	0.537243	1.11795	0.366071	1	0.947599	245	tags=8%, list=3%, signal=7%	FGF9
REACTOME_COLLAGEN_DEGRADATION	REACTOME_COLLAGEN_DEGRADATION	33	0.46597	1.11754	0.355161	1	0.947599	1385	tags=39%, list=17%, signal=33%	COL19A1/COL13A1/COL9A1/MMP2/COL25A1/MMP19/COL16A1/COL4A6/COL1A2/COL12A1/COL9A2/COL4A1/COL4A2
REACTOME_BACTERIAL_INFECTION_PATHWAYS	REACTOME_BACTERIAL_INFECTION_PATHWAYS	37	0.461861	1.11674	0.351648	1	0.947599	1049	tags=19%, list=13%, signal=17%	SNAP25/STX1B/MRC1/CORO1A/SV2A/SYT2/MAP2K6
REACTOME_SENSORY_PERCEPTION	REACTOME_SENSORY_PERCEPTION	94	0.431108	1.11552	0.285714	1	0.947599	1310	tags=29%, list=16%, signal=24%	EBF1/CLPS/CALHM3/SNAP25/HSD17B6/SLC17A8/SYN1/SYP/ATP2B2/TAS2R5/TRPM5/CNGA4/RGS9/CACNA2D2/BSN/CACNB2/MYO3A/LRP2/SCN3A/SCN9A/PPEF1/RBP2/KCNJ2/RAB3A/SCN1B/ADCY3/SDC3
REACTOME_PRE_NOTCH_PROCESSING_IN_GOLGI	REACTOME_PRE_NOTCH_PROCESSING_IN_GOLGI	11	0.554788	1.1152	0.377604	1	0.947599	1400	tags=36%, list=17%, signal=30%	ATP2A3/ST3GAL4/LFNG/RFNG
REACTOME_COMPLEX_IV_ASSEMBLY	REACTOME_COMPLEX_IV_ASSEMBLY	18	-0.354098	-1.11482	0.301676	1	0.947599	2606	tags=61%, list=32%, signal=41%	COX11/HIGD2A/COX4I1/COX6C/NDUFA4/COX15/COQ10B/COX18/COX17/HIGD1A/COX16
REACTOME_FORMATION_OF_PARAXIAL_MESODERM	REACTOME_FORMATION_OF_PARAXIAL_MESODERM	36	0.461727	1.1139	0.364136	1	0.947599	518	tags=11%, list=6%, signal=10%	NOG/DLL1/KAT2B/MESP2
REACTOME_RUNX2_REGULATES_BONE_DEVELOPMENT	REACTOME_RUNX2_REGULATES_BONE_DEVELOPMENT	16	0.515019	1.11175	0.390663	1	0.947599	829	tags=12%, list=10%, signal=11%	GLI2/IHH
REACTOME_DETOXIFICATION_OF_REACTIVE_OXYGEN_SPECIES	REACTOME_DETOXIFICATION_OF_REACTIVE_OXYGEN_SPECIES	16	-0.369274	-1.1102	0.287234	1	0.947599	1863	tags=56%, list=23%, signal=43%	ERO1A/CYCS/GPX8/PRDX3/PRDX6/ATP7A/TXN/PRDX1/SOD3
REACTOME_NEUROTRANSMITTER_RELEASE_CYCLE	REACTOME_NEUROTRANSMITTER_RELEASE_CYCLE	28	0.474213	1.10909	0.359909	1	0.947599	1528	tags=36%, list=19%, signal=29%	SNAP25/SYN1/GAD2/TSPOAP1/GLS2/PPFIA3/SYN2/RAB3A/STXBP1/STX1A
REACTOME_HDR_THROUGH_HOMOLOGOUS_RECOMBINATION_HRR	REACTOME_HDR_THROUGH_HOMOLOGOUS_RECOMBINATION_HRR	20	0.496248	1.10763	0.37381	1	0.947599	2303	tags=45%, list=29%, signal=32%	RTEL1/RMI2/XRCC3/EME1/SPIDR/POLE/POLD1/KAT5/SLX4
REACTOME_TRANSPORT_OF_INORGANIC_CATIONS_ANIONS_AND_AMINO_ACIDS_OLIGOPEPTIDES	REACTOME_TRANSPORT_OF_INORGANIC_CATIONS_ANIONS_AND_AMINO_ACIDS_OLIGOPEPTIDES	48	0.447536	1.10668	0.361884	1	0.947599	679	tags=12%, list=8%, signal=12%	SLC5A8/SLC17A8/SLC6A19/SLC8A3/SLC5A12/SLC24A4
REACTOME_MITF_M_DEPENDENT_GENE_EXPRESSION	REACTOME_MITF_M_DEPENDENT_GENE_EXPRESSION	45	0.450292	1.10526	0.357759	1	0.947599	457	tags=7%, list=6%, signal=6%	TBX2/TERT/BCL2
REACTOME_G_ALPHA_12_13_SIGNALLING_EVENTS	REACTOME_G_ALPHA_12_13_SIGNALLING_EVENTS	40	0.455145	1.10459	0.368943	1	0.947599	2207	tags=48%, list=27%, signal=35%	TIAM1/ADRA1D/GNG11/ADRA1B/GNG4/ARHGEF40/ARHGEF19/MCF2L/RASGRF2/OBSCN/FGD1/GNG2/PREX1/ARHGEF17/ITSN1/FGD4/PLEKHG5/ARHGEF9/ARHGEF2
REACTOME_REGULATION_OF_CHOLESTEROL_BIOSYNTHESIS_BY_SREBP_SREBF	REACTOME_REGULATION_OF_CHOLESTEROL_BIOSYNTHESIS_BY_SREBP_SREBF	25	-0.335537	-1.10406	0.313433	1	0.947599	3275	tags=72%, list=41%, signal=43%	NFYC/SEC24D/SEC24B/INSIG2/NCOA2/TBL1XR1/GPAM/NFYB/RAN/SP1/SEC23A/SEC24A/SAR1B/HMGCS1/SC5D/IDI1/SQLE/INSIG1
REACTOME_ABC_TRANSPORTER_DISORDERS	REACTOME_ABC_TRANSPORTER_DISORDERS	42	-0.31274	-1.10226	0.301205	1	0.947599	1345	tags=38%, list=17%, signal=32%	DERL1/PSMA1/PSMC6/APOA1/PSMB2/PSMA4/ABCD1/LMBRD1/PSMA3/ABCA12/CFTR/PSMB8/PSMA2/PSMA6/ABCB4/DERL3
REACTOME_METABOLISM_OF_VITAMINS_AND_COFACTORS	REACTOME_METABOLISM_OF_VITAMINS_AND_COFACTORS	97	-0.257016	-1.09726	0.290242	1	0.947599	1405	tags=35%, list=17%, signal=29%	MTHFD2/RFK/PC/PPCS/PDZD11/MMAA/NMNAT1/RDH11/APOA1/MTHFS/PRSS1/TPK1/LMBRD1/PDSS2/GPC3/TTR/SLC25A19/NAMPT/COQ2/GPC4/COQ6/AKR1B10/AMN/APOM/PRSS3/SLC2A3/ENPP2/RBP4/PTGIS/BCO1/TCN1/ACP5/PRKG2/SLC52A3
REACTOME_ASYMMETRIC_LOCALIZATION_OF_PCP_PROTEINS	REACTOME_ASYMMETRIC_LOCALIZATION_OF_PCP_PROTEINS	32	-0.331143	-1.09332	0.346154	1	0.947599	1736	tags=38%, list=22%, signal=30%	PSMA5/PSMD12/SMURF2/PSMA1/PSMC6/PSMB2/PSMA4/WNT5A/PSMA3/PSMB8/PSMA2/PSMA6
REACTOME_FORMATION_OF_THE_CORNIFIED_ENVELOPE	REACTOME_FORMATION_OF_THE_CORNIFIED_ENVELOPE	13	0.524055	1.09051	0.406888	1	0.947599	291	tags=15%, list=4%, signal=15%	EVPL/KRT81
REACTOME_SYNTHESIS_OF_PA	REACTOME_SYNTHESIS_OF_PA	17	-0.353008	-1.0899	0.359116	1	0.947599	976	tags=29%, list=12%, signal=26%	PLA2R1/ALPI/GPAT3/LIPH/PLA2G2A
REACTOME_CLASS_I_PEROXISOMAL_MEMBRANE_PROTEIN_IMPORT	REACTOME_CLASS_I_PEROXISOMAL_MEMBRANE_PROTEIN_IMPORT	11	-0.409773	-1.08912	0.346154	1	0.947599	1879	tags=64%, list=23%, signal=49%	PEX13/SLC25A17/ATAD1/PEX3/ABCD1/PEX12/PXMP2
REACTOME_EXTRACELLULAR_MATRIX_ORGANIZATION	REACTOME_EXTRACELLULAR_MATRIX_ORGANIZATION	135	0.414467	1.0886	0.332323	1	0.947599	1385	tags=29%, list=17%, signal=24%	ADAMTS8/COL19A1/VWF/COL13A1/COL9A1/MMP2/EMILIN3/ITGA4/NCAM1/FBN1/ADAM12/NCAN/SPOCK3/SH3PXD2A/NID2/SPP1/COL25A1/LOXL3/MMP19/COL16A1/ACAN/FBN3/COL4A6/ADAM8/CAPN10/COL27A1/SCUBE3/CAPN12/LOXL2/MADCAM1/COL1A2/COL12A1/COL9A2/LTBP4/ITGB3/COL4A1/SDC3/THBS1/COL4A2
REACTOME_METABOLISM_OF_STEROID_HORMONES	REACTOME_METABOLISM_OF_STEROID_HORMONES	13	-0.392182	-1.08827	0.37156	1	0.947599	661	tags=31%, list=8%, signal=28%	HSD17B12/SERPINA6/SRD5A3/CYP11A1
REACTOME_SIGNALING_BY_SCF_KIT	REACTOME_SIGNALING_BY_SCF_KIT	21	0.483623	1.08761	0.383432	1	0.947599	1751	tags=29%, list=22%, signal=22%	LCK/FES/FYN/PRKCA/GAB2/SOCS1
REACTOME_LATE_SARS_COV_2_INFECTION_EVENTS	REACTOME_LATE_SARS_COV_2_INFECTION_EVENTS	40	0.447828	1.08683	0.39207	1	0.947599	889	tags=12%, list=11%, signal=11%	ANO3/MGAT4C/ANO4/ANO7/ZDHHC11
REACTOME_HSF1_DEPENDENT_TRANSACTIVATION	REACTOME_HSF1_DEPENDENT_TRANSACTIVATION	22	0.480072	1.08644	0.38687	1	0.947599	1645	tags=23%, list=20%, signal=18%	CAMK2B/HSPA6/COL4A6/HSPA2/HSPA1A
REACTOME_MITOCHONDRIAL_FATTY_ACID_BETA_OXIDATION	REACTOME_MITOCHONDRIAL_FATTY_ACID_BETA_OXIDATION	17	0.496939	1.08531	0.405603	1	0.947599	42	tags=6%, list=1%, signal=6%	ACSM6
REACTOME_COMPLEX_I_BIOGENESIS	REACTOME_COMPLEX_I_BIOGENESIS	36	-0.32032	-1.08515	0.354839	1	0.947599	2778	tags=56%, list=35%, signal=37%	NDUFAF7/NDUFV3/OXA1L/SFXN4/NDUFA2/NDUFS5/NDUFA6/TMEM126B/NDUFA5/NDUFA10/TIMMDC1/NDUFS4/NDUFC2/NDUFAF2/NDUFB6/NUBPL/NDUFAF4/NDUFA9/NDUFV2/NDUFA7
REACTOME_TRANSCRIPTIONAL_REGULATION_BY_MECP2	REACTOME_TRANSCRIPTIONAL_REGULATION_BY_MECP2	33	0.452341	1.08486	0.405105	1	0.947599	1103	tags=21%, list=14%, signal=18%	CAMK2B/GAD2/DLL1/SST/GRIA2/RBFOX1/GPS2
REACTOME_METABOLISM_OF_CARBOHYDRATES	REACTOME_METABOLISM_OF_CARBOHYDRATES	123	0.413381	1.08306	0.348178	1	0.947599	1336	tags=20%, list=17%, signal=17%	FUT9/B3GAT2/B3GALT2/SLC37A2/GCK/NCAN/B3GAT1/KHK/PPP1R3C/RHCE/CEMIP/FUT3/UST/ACAN/ENO3/ENO2/NUP210/B3GNT7/HS3ST1/CHST6/ST3GAL4/PFKM/B3GNT4/SDC3/SLC2A1
REACTOME_SIGNALING_BY_NTRK2_TRKB	REACTOME_SIGNALING_BY_NTRK2_TRKB	13	0.518164	1.07825	0.417092	1	0.947599	1622	tags=31%, list=20%, signal=25%	TIAM1/DOCK3/NTRK2/FYN
REACTOME_GPVI_MEDIATED_ACTIVATION_CASCADE	REACTOME_GPVI_MEDIATED_ACTIVATION_CASCADE	17	0.493476	1.07774	0.412911	1	0.947599	1135	tags=18%, list=14%, signal=15%	LCK/MPIG6B/COL1A2
REACTOME_SEMAPHORIN_INTERACTIONS	REACTOME_SEMAPHORIN_INTERACTIONS	34	0.447681	1.07767	0.405733	1	0.947599	1917	tags=35%, list=24%, signal=27%	DPYSL5/PLXNC1/FES/PLXNA2/DPYSL3/DPYSL4/CRMP1/FYN/MYH10/PLXNA1/ERBB2/PLXND1
REACTOME_DEGRADATION_OF_AXIN	REACTOME_DEGRADATION_OF_AXIN	28	-0.325785	-1.07745	0.346774	1	0.947599	1736	tags=43%, list=22%, signal=34%	PSMA5/PSMD12/SMURF2/RNF146/PSMA1/PSMC6/PSMB2/PSMA4/PSMA3/PSMB8/PSMA2/PSMA6
REACTOME_SIGNAL_TRANSDUCTION_BY_L1	REACTOME_SIGNAL_TRANSDUCTION_BY_L1	12	0.528957	1.07741	0.406494	1	0.947599	1256	tags=25%, list=16%, signal=21%	NCAM1/L1CAM/ITGB3
REACTOME_GAP_JUNCTION_ASSEMBLY	REACTOME_GAP_JUNCTION_ASSEMBLY	13	0.517495	1.07686	0.417092	1	0.947599	286	tags=15%, list=4%, signal=15%	GJA4/GJD3
REACTOME_METABOLISM_OF_COFACTORS	REACTOME_METABOLISM_OF_COFACTORS	16	-0.357443	-1.07464	0.345745	1	0.947599	878	tags=25%, list=11%, signal=22%	PDSS2/COQ2/COQ6/PRKG2
REACTOME_RHO_GTPASES_ACTIVATE_FORMINS	REACTOME_RHO_GTPASES_ACTIVATE_FORMINS	59	0.429198	1.07458	0.395153	1	0.947599	1370	tags=19%, list=17%, signal=16%	SPC24/BIRC5/CENPE/CENPM/DYNC1I1/ZWINT/SGO2/SRGAP2/CENPO/SGO1/CENPL
REACTOME_INTERLEUKIN_10_SIGNALING	REACTOME_INTERLEUKIN_10_SIGNALING	11	0.534175	1.07376	0.416667	1	0.947599	609	tags=27%, list=8%, signal=25%	CXCL1/IL10RA/CXCL8
REACTOME_DISEASES_OF_METABOLISM	REACTOME_DISEASES_OF_METABOLISM	106	-0.258556	-1.07113	0.34069	1	0.947599	890	tags=24%, list=11%, signal=21%	TPMT/C1GALT1/GPC3/C1GALT1C1/GBE1/GNS/GALNT3/ADAMTS9/GPC4/MUC20/AMN/GGT1/MAT1A/MUC3A/MUC1/SBSPON/SPON1/MUC15/SRD5A3/MUC16/PRELP/NHLRC1/MUC13/CYP11A1/MUC17
REACTOME_TBC_RABGAPS	REACTOME_TBC_RABGAPS	21	0.476289	1.07112	0.402367	1	0.947599	63	tags=5%, list=1%, signal=5%	RAB33A
REACTOME_PI3K_AKT_SIGNALING_IN_CANCER	REACTOME_PI3K_AKT_SIGNALING_IN_CANCER	46	0.433854	1.06834	0.415501	1	0.947599	1717	tags=24%, list=21%, signal=19%	LCK/FGF18/FGF9/NRG3/NTRK3/BAD/NTRK2/FGF19/FOXO6/FYN/GAB2
REACTOME_SENESCENCE_ASSOCIATED_SECRETORY_PHENOTYPE_SASP	REACTOME_SENESCENCE_ASSOCIATED_SECRETORY_PHENOTYPE_SASP	23	0.467634	1.06807	0.410673	1	0.947599	609	tags=13%, list=8%, signal=12%	UBE2C/CCNA1/CXCL8
REACTOME_INTERFERON_ALPHA_BETA_SIGNALING	REACTOME_INTERFERON_ALPHA_BETA_SIGNALING	35	-0.313701	-1.06632	0.350515	1	0.947599	765	tags=31%, list=10%, signal=29%	IFI35/MX2/HLA-B/IFIT5/EGR1/IFIT3/HLA-F/IRF5/PSMB8/IFIT2/GBP2
REACTOME_SPHINGOLIPID_DE_NOVO_BIOSYNTHESIS	REACTOME_SPHINGOLIPID_DE_NOVO_BIOSYNTHESIS	21	0.47393	1.06581	0.413018	1	0.947599	1479	tags=24%, list=18%, signal=19%	CERS1/SPTSSB/PRKD1/DEGS2/SPHK1
REACTOME_SARS_COV_1_ACTIVATES_MODULATES_INNATE_IMMUNE_RESPONSES	REACTOME_SARS_COV_1_ACTIVATES_MODULATES_INNATE_IMMUNE_RESPONSES	25	-0.32379	-1.06541	0.380597	1	0.947599	265	tags=16%, list=3%, signal=16%	IFIH1/RUNX1/NMI/CASP1
REACTOME_GOLGI_TO_ER_RETROGRADE_TRANSPORT	REACTOME_GOLGI_TO_ER_RETROGRADE_TRANSPORT	69	0.420398	1.06491	0.412134	1	0.947599	1359	tags=17%, list=17%, signal=15%	KIF20A/KIF4A/CENPE/KIF19/KIF5A/KIFC1/DYNC1I1/KIF26A/PLA2G6/KIF6/KIF12/KLC1
REACTOME_POSTMITOTIC_NUCLEAR_PORE_COMPLEX_NPC_REFORMATION	REACTOME_POSTMITOTIC_NUCLEAR_PORE_COMPLEX_NPC_REFORMATION	15	-0.360727	-1.06157	0.375	1	0.947599	5150	tags=100%, list=64%, signal=36%	RANGAP1/NUP188/NUP62/RCC1/UBE2I/NUP98/SEH1L/NUP58/NUP133/NUP54/RAN/SUMO1/NUP93/NUP37
REACTOME_HOMOLOGY_DIRECTED_REPAIR	REACTOME_HOMOLOGY_DIRECTED_REPAIR	42	0.433801	1.05923	0.428727	1	0.947599	2313	tags=38%, list=29%, signal=27%	RTEL1/CCNA1/RMI2/XRCC3/EME1/XRCC1/ERCC1/NSD2/MDC1/SPIDR/TIPIN/POLE/POLD1/KAT5/SLX4/HERC2
REACTOME_FATTY_ACID_METABOLISM	REACTOME_FATTY_ACID_METABOLISM	73	-0.264398	-1.05759	0.270789	1	0.947599	2032	tags=52%, list=25%, signal=39%	ELOVL7/ACSL4/HADHA/HPGD/ELOVL5/SLC25A17/CPT2/AKR1C3/ACOT2/SLC22A5/PHYH/CROT/EHHADH/SCP2/ECI2/MMAA/ACAD10/NUDT19/SCD5/ACOT13/ACSM3/ABCD1/HACD1/TECR/ACOT11/HSD17B12/CBR4/ACOT1/GGT1/NUDT7/CPT1B/SLC27A2/ACOX2/THEM5/ALOX5AP/PTGIS/PTGR2/PTGS1
REACTOME_SIGNALING_BY_MODERATE_KINASE_ACTIVITY_BRAF_MUTANTS	REACTOME_SIGNALING_BY_MODERATE_KINASE_ACTIVITY_BRAF_MUTANTS	30	0.446424	1.05669	0.42841	1	0.947599	711	tags=10%, list=9%, signal=9%	VWF/CAMK2B/KSR2
REACTOME_SEPARATION_OF_SISTER_CHROMATIDS	REACTOME_SEPARATION_OF_SISTER_CHROMATIDS	82	0.412416	1.05554	0.411157	1	0.947599	1370	tags=17%, list=17%, signal=14%	SPC24/UBE2C/BIRC5/CENPE/CENPM/ESPL1/DYNC1I1/ZWINT/PTTG1/SGO2/CENPO/ANAPC15/SGO1/CENPL
REACTOME_SIGNALING_BY_MET	REACTOME_SIGNALING_BY_MET	38	-0.312967	-1.05474	0.4	1	0.947599	1248	tags=29%, list=16%, signal=25%	PTPRJ/RAP1A/COL1A1/ITGB1/LAMC2/LAMB3/MUC20/ITGA3/SH3GL3/COL11A2/LAMA2
REACTOME_TP53_REGULATES_TRANSCRIPTION_OF_CELL_DEATH_GENES	REACTOME_TP53_REGULATES_TRANSCRIPTION_OF_CELL_DEATH_GENES	21	-0.32762	-1.05426	0.401274	1	0.947599	1373	tags=29%, list=17%, signal=24%	TP73/CASP2/PERP/TNFRSF10C/BCL2L14/CASP1
REACTOME_MEIOTIC_RECOMBINATION	REACTOME_MEIOTIC_RECOMBINATION	10	-0.412407	-1.05412	0.371429	1	0.947599	29	tags=20%, list=0%, signal=20%	RAD51C/DMC1
REACTOME_GLYCOSAMINOGLYCAN_METABOLISM	REACTOME_GLYCOSAMINOGLYCAN_METABOLISM	50	0.424188	1.05367	0.434043	1	0.947599	1310	tags=24%, list=16%, signal=20%	B3GAT2/NCAN/B3GAT1/CEMIP/UST/ACAN/B3GNT7/HS3ST1/CHST6/ST3GAL4/B3GNT4/SDC3
REACTOME_NONHOMOLOGOUS_END_JOINING_NHEJ	REACTOME_NONHOMOLOGOUS_END_JOINING_NHEJ	19	-0.334061	-1.05092	0.397661	1	0.947599	36	tags=11%, list=0%, signal=11%	BABAM2/NHEJ1
REACTOME_SIGNALING_BY_NOTCH	REACTOME_SIGNALING_BY_NOTCH	105	0.402211	1.04975	0.395939	1	0.947599	1194	tags=15%, list=15%, signal=13%	FABP7/NEURL1/NEURL1B/ATP2A3/DLL1/HDAC10/KAT2B/DLL4/FLT4/DTX1/E2F1/DNER/NBEA/ST3GAL4/HDAC11/LFNG
REACTOME_SIGNALING_BY_FGFR1_IN_DISEASE	REACTOME_SIGNALING_BY_FGFR1_IN_DISEASE	17	0.480606	1.04964	0.439708	1	0.947599	245	tags=6%, list=3%, signal=6%	FGF9
REACTOME_DAP12_SIGNALING	REACTOME_DAP12_SIGNALING	13	0.503525	1.04779	0.436224	1	0.947599	142	tags=8%, list=2%, signal=8%	LCK
REACTOME_RAB_GERANYLGERANYLATION	REACTOME_RAB_GERANYLGERANYLATION	35	0.434324	1.04541	0.450829	1	0.947599	1190	tags=23%, list=15%, signal=20%	RAB33A/RAB26/RAB39A/RAB39B/RAB40B/RAB36/RAB3A/RAB15
REACTOME_NOTCH_HLH_TRANSCRIPTION_PATHWAY	REACTOME_NOTCH_HLH_TRANSCRIPTION_PATHWAY	18	0.477547	1.04472	0.447145	1	0.947599	1186	tags=17%, list=15%, signal=14%	HDAC10/KAT2B/HDAC11
REACTOME_SPHINGOLIPID_METABOLISM	REACTOME_SPHINGOLIPID_METABOLISM	55	0.416932	1.04424	0.449842	1	0.947599	1171	tags=16%, list=15%, signal=14%	SGPP2/ST8SIA5/SMPD3/ALDH3B1/CERS1/SPTSSB/PRKD1/DEGS2/GBA3
REACTOME_BASIGIN_INTERACTIONS	REACTOME_BASIGIN_INTERACTIONS	17	-0.337967	-1.04347	0.425414	1	0.947599	997	tags=35%, list=12%, signal=31%	ITGB1/ATP1B1/ITGA6/ITGA3/SLC7A9/SLC7A10
REACTOME_LAMININ_INTERACTIONS	REACTOME_LAMININ_INTERACTIONS	20	-0.33018	-1.03983	0.41358	1	0.947599	997	tags=40%, list=12%, signal=35%	ITGB1/LAMC2/ITGA6/COL4A4/LAMB3/ITGA7/ITGA3/LAMA2
REACTOME_COMMON_PATHWAY_OF_FIBRIN_CLOT_FORMATION	REACTOME_COMMON_PATHWAY_OF_FIBRIN_CLOT_FORMATION	11	-0.390388	-1.0376	0.401709	1	0.947599	1008	tags=55%, list=13%, signal=48%	F2/PROS1/SERPINE2/FGG/FGA/FGB
REACTOME_SARS_COV_1_TARGETS_HOST_INTRACELLULAR_SIGNALLING_AND_REGULATORY_PATHWAYS	REACTOME_SARS_COV_1_TARGETS_HOST_INTRACELLULAR_SIGNALLING_AND_REGULATORY_PATHWAYS	13	-0.372619	-1.03398	0.426606	1	0.947599	2493	tags=69%, list=31%, signal=48%	PDPK1/YWHAE/SP1/YWHAZ/YWHAG/YWHAB/PSMC6/SFN/YWHAQ
REACTOME_HEDGEHOG_ON_STATE	REACTOME_HEDGEHOG_ON_STATE	48	0.41726	1.03182	0.463597	1	0.947599	1343	tags=17%, list=17%, signal=14%	GLI2/GLI1/GAS1/PTCH2/IHH/BOC/PTCH1/EVC
REACTOME_O_GLYCOSYLATION_OF_TSR_DOMAIN_CONTAINING_PROTEINS	REACTOME_O_GLYCOSYLATION_OF_TSR_DOMAIN_CONTAINING_PROTEINS	13	0.49581	1.03173	0.46301	1	0.947599	39	tags=8%, list=0%, signal=8%	ADAMTS8
REACTOME_PLATELET_AGGREGATION_PLUG_FORMATION	REACTOME_PLATELET_AGGREGATION_PLUG_FORMATION	26	0.445941	1.03139	0.452765	1	0.947599	1256	tags=23%, list=16%, signal=20%	VWF/RASGRP1/ADRA2C/RAPGEF4/COL1A2/ITGB3
REACTOME_NRAGE_SIGNALS_DEATH_THROUGH_JNK	REACTOME_NRAGE_SIGNALS_DEATH_THROUGH_JNK	36	0.426321	1.02848	0.469747	1	0.947599	2207	tags=44%, list=27%, signal=32%	TIAM1/NGF/BAD/ARHGEF40/ARHGEF19/MCF2L/RASGRF2/OBSCN/FGD1/PREX1/ARHGEF17/ITSN1/FGD4/PLEKHG5/ARHGEF9/ARHGEF2
REACTOME_O_LINKED_GLYCOSYLATION_OF_MUCINS	REACTOME_O_LINKED_GLYCOSYLATION_OF_MUCINS	33	-0.310631	-1.02809	0.435644	1	0.947599	1141	tags=36%, list=14%, signal=31%	GCNT3/GALNT7/C1GALT1/C1GALT1C1/GALNT3/MUC20/MUC3A/MUC1/MUC15/MUC16/MUC13/MUC17
REACTOME_RAS_PROCESSING	REACTOME_RAS_PROCESSING	14	-0.363392	-1.02698	0.424242	1	0.947599	847	tags=71%, list=11%, signal=64%	KRAS/FNTA/LYPLA1/RCE1/ICMT/ABHD17B/ZDHHC9/UBA52/ABHD17C/PRKG2
REACTOME_FC_EPSILON_RECEPTOR_FCERI_SIGNALING	REACTOME_FC_EPSILON_RECEPTOR_FCERI_SIGNALING	66	-0.263945	-1.02619	0.357493	1	0.947599	1736	tags=29%, list=22%, signal=23%	PSMA5/CHUK/RAC1/PSMD12/PSMA1/VAV3/PSMC6/PIK3CB/PSMB2/PSMA4/NFATC1/SKP1/PSMA3/BCL10/UBE2D1/GRAP2/PSMB8/PSMA2/PSMA6
REACTOME_CELL_CYCLE	REACTOME_CELL_CYCLE	301	0.382386	1.0231	0.418581	1	0.947599	1669	tags=20%, list=21%, signal=16%	TERT/SPC24/PIF1/GTSE1/UBE2C/KIF20A/MCM10/RTEL1/BIRC5/CENPE/CCNA1/CENPM/ESPL1/CDC25A/TEX15/DYNC1I1/CDC25C/GINS2/CCNB2/ZWINT/E2F1/HAUS5/CDC6/RMI2/CHTF18/AURKA/TK1/PTTG1/CCNE2/SGO2/NUP210/PPP1R12B/CDC25B/CENPO/MCM2/ANAPC15/STAG3/PCBP4/CHMP6/HSPA2/CDT1/SGO1/REC8/MCM5/CENPL/CEP131/PSMC3IP/GINS1/TYMS/SYNE2/PCNT/MZT2A/NSD2/NCAPG2/CENPW/OIP5/PRKCA/CEP192/POLA2
REACTOME_NOTCH4_INTRACELLULAR_DOMAIN_REGULATES_TRANSCRIPTION	REACTOME_NOTCH4_INTRACELLULAR_DOMAIN_REGULATES_TRANSCRIPTION	12	0.502057	1.02262	0.484416	1	0.947599	728	tags=17%, list=9%, signal=15%	KAT2B/FLT4
REACTOME_SEMA4D_INDUCED_CELL_MIGRATION_AND_GROWTH_CONE_COLLAPSE	REACTOME_SEMA4D_INDUCED_CELL_MIGRATION_AND_GROWTH_CONE_COLLAPSE	11	-0.384273	-1.02134	0.423077	1	0.947599	89	tags=18%, list=1%, signal=18%	MYL12B/MYH11
REACTOME_ELASTIC_FIBRE_FORMATION	REACTOME_ELASTIC_FIBRE_FORMATION	23	0.446512	1.01982	0.467517	1	0.947599	1560	tags=39%, list=19%, signal=32%	EMILIN3/FBN1/LOXL3/FBN3/LOXL2/LTBP4/ITGB3/LTBP2/MFAP2
REACTOME_SARS_COV_1_MODULATES_HOST_TRANSLATION_MACHINERY	REACTOME_SARS_COV_1_MODULATES_HOST_TRANSLATION_MACHINERY	17	-0.329971	-1.01878	0.447514	1	0.947599	4309	tags=82%, list=54%, signal=38%	RPS4Y1/RPS12/RPS5/RPS20/RPS4X/RPS16/RPS3A/RPS13/EEF1A1/RPS7/RPS15A/RPS14/RPS6/RPS27L
REACTOME_E3_UBIQUITIN_LIGASES_UBIQUITINATE_TARGET_PROTEINS	REACTOME_E3_UBIQUITIN_LIGASES_UBIQUITINATE_TARGET_PROTEINS	22	-0.315496	-1.0164	0.42953	1	0.947599	2786	tags=55%, list=35%, signal=36%	UBE2N/UBE2A/UBA52/UBE2L3/LEO1/PEX13/UBE2V2/UBE2B/DERL1/BCL10/UBE2D1/PEX12
REACTOME_G_BETA_GAMMA_SIGNALLING_THROUGH_PI3KGAMMA	REACTOME_G_BETA_GAMMA_SIGNALLING_THROUGH_PI3KGAMMA	10	0.513281	1.01622	0.479524	1	0.947599	2641	tags=60%, list=33%, signal=40%	GNG11/GNG4/GNG2/PIK3R5/AKT2/AKT1
REACTOME_DOWNSTREAM_SIGNAL_TRANSDUCTION	REACTOME_DOWNSTREAM_SIGNAL_TRANSDUCTION	15	-0.342921	-1.00917	0.4375	1	0.947599	5293	tags=100%, list=66%, signal=34%	SRC/RAPGEF1/BCAR1/RASA1/NCK2/CRKL/SOS1/KRAS/STAT3/PIK3CA/CRK/STAT5A/PIK3CB/NCK1
REACTOME_CARGO_CONCENTRATION_IN_THE_ER	REACTOME_CARGO_CONCENTRATION_IN_THE_ER	23	0.44158	1.00856	0.482599	1	0.947599	246	tags=9%, list=3%, signal=8%	GRIA1/CNIH2
REACTOME_GAP_JUNCTION_TRAFFICKING_AND_REGULATION	REACTOME_GAP_JUNCTION_TRAFFICKING_AND_REGULATION	22	0.444279	1.00544	0.490035	1	0.947599	746	tags=14%, list=9%, signal=12%	GJA4/GJD3/DNM1
REACTOME_CELL_CELL_COMMUNICATION	REACTOME_CELL_CELL_COMMUNICATION	72	0.396019	1.0048	0.507338	1	0.947599	809	tags=11%, list=10%, signal=10%	PRDM8/CDH18/ACTN3/KIRREL2/CDH8/CLDN11/CLDN19/SDK1
REACTOME_MEIOTIC_SYNAPSIS	REACTOME_MEIOTIC_SYNAPSIS	14	0.475239	1.00217	0.503731	1	0.947599	1549	tags=29%, list=19%, signal=23%	STAG3/HSPA2/REC8/SYNE2
REACTOME_SUMOYLATION_OF_DNA_REPLICATION_PROTEINS	REACTOME_SUMOYLATION_OF_DNA_REPLICATION_PROTEINS	24	0.436999	1.00206	0.491329	1	0.947599	1054	tags=12%, list=13%, signal=11%	BIRC5/AURKA/NUP210
REACTOME_GLUCOSE_METABOLISM	REACTOME_GLUCOSE_METABOLISM	36	0.415144	1.00152	0.507151	1	0.947599	1239	tags=17%, list=15%, signal=14%	SLC37A2/GCK/ENO3/ENO2/NUP210/PFKM
REACTOME_NEUREXINS_AND_NEUROLIGINS	REACTOME_NEUREXINS_AND_NEUROLIGINS	29	0.426852	1.00123	0.498864	1	0.947599	2372	tags=52%, list=29%, signal=37%	NRXN2/DLG4/SYT2/NRXN3/NLGN3/DLGAP3/STXBP1/STX1A/APBA2/HOMER3/SYT7/LIN7B/EPB41/NLGN2/DBNL
REACTOME_REGULATION_OF_INSULIN_LIKE_GROWTH_FACTOR_IGF_TRANSPORT_AND_UPTAKE_BY_INSULIN_LIKE_GROWTH_FACTOR_BINDING_PROTEINS_IGFBPS	REACTOME_REGULATION_OF_INSULIN_LIKE_GROWTH_FACTOR_IGF_TRANSPORT_AND_UPTAKE_BY_INSULIN_LIKE_GROWTH_FACTOR_BINDING_PROTEINS_IGFBPS	54	0.399596	0.999063	0.512169	1	0.947599	1253	tags=22%, list=16%, signal=19%	HRC/MMP2/FBN1/SCG2/EVA1A/CHGB/SPP1/IGFBP5/SCG3/PAPPA2/PENK/IGFBP3
REACTOME_GABA_SYNTHESIS_RELEASE_REUPTAKE_AND_DEGRADATION	REACTOME_GABA_SYNTHESIS_RELEASE_REUPTAKE_AND_DEGRADATION	11	0.496363	0.997759	0.515625	1	0.947599	1528	tags=45%, list=19%, signal=37%	SNAP25/GAD2/RAB3A/STXBP1/STX1A
REACTOME_SIGNALING_BY_HEDGEHOG	REACTOME_SIGNALING_BY_HEDGEHOG	80	0.390179	0.997019	0.516563	1	0.947599	2280	tags=34%, list=28%, signal=24%	GLI2/GLI1/GAS1/PTCH2/DISP2/ADCY2/ADCY1/IHH/BOC/PTCH1/WDR35/ADCY3/EVC/ADCY7/ADCY8/FUZ/KIF7/WDR19/ADCY9/SMO/IFT172/TUBB2B/ADCY6/TUBA4A/MKS1/ULK3/SUFU
REACTOME_RMTS_METHYLATE_HISTONE_ARGININES	REACTOME_RMTS_METHYLATE_HISTONE_ARGININES	16	0.461857	0.996992	0.509828	1	0.947599	3790	tags=88%, list=47%, signal=46%	ACTL6B/DNMT3A/PRMT6/ARID1B/SMARCD1/SMARCC2/SMARCA4/CDK4/PRMT5/PRMT7/RBBP7/JAK2/RPS2/PRMT1
REACTOME_SYNTHESIS_OF_ACTIVE_UBIQUITIN_ROLES_OF_E1_AND_E2_ENZYMES	REACTOME_SYNTHESIS_OF_ACTIVE_UBIQUITIN_ROLES_OF_E1_AND_E2_ENZYMES	16	0.461728	0.996713	0.509828	1	0.947599	178	tags=6%, list=2%, signal=6%	UBE2C
REACTOME_NEGATIVE_REGULATORS_OF_DDX58_IFIH1_SIGNALING	REACTOME_NEGATIVE_REGULATORS_OF_DDX58_IFIH1_SIGNALING	18	0.455206	0.995848	0.499392	1	0.947599	1342	tags=22%, list=17%, signal=19%	UBA7/IKBKE/HERC5/PIN1
REACTOME_CROSS_PRESENTATION_OF_SOLUBLE_EXOGENOUS_ANTIGENS_ENDOSOMES	REACTOME_CROSS_PRESENTATION_OF_SOLUBLE_EXOGENOUS_ANTIGENS_ENDOSOMES	24	-0.302824	-0.992098	0.459854	1	0.947599	1736	tags=42%, list=22%, signal=33%	PSMA5/PSMD12/PSMA1/PSMC6/PSMB2/PSMA4/PSMA3/PSMB8/PSMA2/PSMA6
REACTOME_GENE_AND_PROTEIN_EXPRESSION_BY_JAK_STAT_SIGNALING_AFTER_INTERLEUKIN_12_STIMULATION	REACTOME_GENE_AND_PROTEIN_EXPRESSION_BY_JAK_STAT_SIGNALING_AFTER_INTERLEUKIN_12_STIMULATION	14	-0.350887	-0.991643	0.474747	1	0.947599	2865	tags=79%, list=36%, signal=51%	MTAP/CNN2/HSPA9/PAK2/RAP1B/SOD1/SNRPA1/RALA/CAPZA1/GSTA2/MIF
REACTOME_TAK1_DEPENDENT_IKK_AND_NF_KAPPA_B_ACTIVATION	REACTOME_TAK1_DEPENDENT_IKK_AND_NF_KAPPA_B_ACTIVATION	24	-0.302543	-0.991177	0.459854	1	0.947599	5620	tags=100%, list=70%, signal=30%	IRAK1/NFKB1/TAB1/UBE2V1/USP18/NFKB2/TP53/LRRC14/IKBKB/RELA/NFKBIA/TAB3/NKIRAS2/N4BP1/UBE2N/TAB2/UBA52/USP14/CHUK/AGER/CASP8/IKBIP/TIFA
REACTOME_HEME_BIOSYNTHESIS	REACTOME_HEME_BIOSYNTHESIS	11	-0.37262	-0.99037	0.474359	1	0.947599	5053	tags=100%, list=63%, signal=37%	HMBS/COX10/ABCG2/CPOX/ALAD/ALAS1/FECH/COX15/UROS/ALB
REACTOME_MITOTIC_METAPHASE_AND_ANAPHASE	REACTOME_MITOTIC_METAPHASE_AND_ANAPHASE	104	0.379484	0.989761	0.525355	1	0.947599	1370	tags=15%, list=17%, signal=13%	SPC24/UBE2C/BIRC5/CENPE/CENPM/ESPL1/DYNC1I1/CCNB2/ZWINT/PTTG1/SGO2/CENPO/ANAPC15/CHMP6/SGO1/CENPL
REACTOME_HIV_TRANSCRIPTION_INITIATION	REACTOME_HIV_TRANSCRIPTION_INITIATION	22	-0.306666	-0.987955	0.489933	1	0.947599	2545	tags=55%, list=32%, signal=37%	GTF2A2/TAF11/TBP/TAF9/GTF2H1/POLR2B/GTF2E1/GTF2E2/TAF7/GTF2A1/TAF5/CCNH
REACTOME_DNA_REPLICATION	REACTOME_DNA_REPLICATION	57	0.394302	0.985431	0.538543	1	0.947599	1803	tags=25%, list=22%, signal=19%	UBE2C/MCM10/CCNA1/GINS2/CDC6/CCNE2/MCM2/ANAPC15/CDT1/MCM5/GINS1/POLA2/UBE2S/MCM8
REACTOME_GRB2_SOS_PROVIDES_LINKAGE_TO_MAPK_SIGNALING_FOR_INTEGRINS	REACTOME_GRB2_SOS_PROVIDES_LINKAGE_TO_MAPK_SIGNALING_FOR_INTEGRINS	12	0.483741	0.985314	0.525974	1	0.947599	87	tags=8%, list=1%, signal=8%	VWF
REACTOME_HSP90_CHAPERONE_CYCLE_FOR_STEROID_HORMONE_RECEPTORS_SHR_IN_THE_PRESENCE_OF_LIGAND	REACTOME_HSP90_CHAPERONE_CYCLE_FOR_STEROID_HORMONE_RECEPTORS_SHR_IN_THE_PRESENCE_OF_LIGAND	28	0.421155	0.984998	0.523918	1	0.947599	620	tags=7%, list=8%, signal=7%	PGR/DYNC1I1
REACTOME_DEGRADATION_OF_GLI1_BY_THE_PROTEASOME	REACTOME_DEGRADATION_OF_GLI1_BY_THE_PROTEASOME	30	-0.298611	-0.984861	0.495652	1	0.947599	1736	tags=37%, list=22%, signal=29%	PSMA5/PSMD12/PSMA1/PSMC6/PSMB2/PSMA4/SKP1/PSMA3/PSMB8/PSMA2/PSMA6
REACTOME_WNT5A_DEPENDENT_INTERNALIZATION_OF_FZD4	REACTOME_WNT5A_DEPENDENT_INTERNALIZATION_OF_FZD4	11	0.489475	0.983912	0.527344	1	0.947599	1891	tags=27%, list=24%, signal=21%	PRKCG/PRKCA/DVL2
REACTOME_RESPONSE_TO_ELEVATED_PLATELET_CYTOSOLIC_CA2	REACTOME_RESPONSE_TO_ELEVATED_PLATELET_CYTOSOLIC_CA2	58	-0.265193	-0.981984	0.52	1	0.947599	1221	tags=36%, list=15%, signal=31%	AHSG/STXBP3/SERPINA4/APOA1/APLP2/ABCC4/FAM3C/HSPA5/PROS1/CDC37L1/FGG/A2M/SERPINA1/FGA/FGB/ECM1/TF/EGF/ALB/PECAM1/ORM2
REACTOME_CD28_CO_STIMULATION	REACTOME_CD28_CO_STIMULATION	20	0.439546	0.981073	0.525	1	0.947599	142	tags=5%, list=2%, signal=5%	LCK
REACTOME_SIGNALING_BY_FGFR	REACTOME_SIGNALING_BY_FGFR	34	0.407445	0.98081	0.53914	1	0.947599	245	tags=6%, list=3%, signal=6%	FGF18/FGF9
REACTOME_INTEGRIN_SIGNALING	REACTOME_INTEGRIN_SIGNALING	21	0.436028	0.980577	0.518343	1	0.947599	1256	tags=19%, list=16%, signal=16%	VWF/RASGRP1/RAPGEF4/ITGB3
REACTOME_INTERLEUKIN_3_INTERLEUKIN_5_AND_GM_CSF_SIGNALING	REACTOME_INTERLEUKIN_3_INTERLEUKIN_5_AND_GM_CSF_SIGNALING	24	-0.298756	-0.978769	0.489051	1	0.947599	481	tags=50%, list=6%, signal=47%	PIK3CA/YES1/UBA52/YWHAZ/CRK/PIK3R3/STAT5A/JAK1/PIK3CB/IL3RA/IL2RG/BLNK
REACTOME_MHC_CLASS_II_ANTIGEN_PRESENTATION	REACTOME_MHC_CLASS_II_ANTIGEN_PRESENTATION	61	0.389825	0.97865	0.539832	1	0.947599	1141	tags=18%, list=14%, signal=16%	KIF20A/KIF4A/CENPE/KIF5A/HLA-DQA2/CTSE/DYNC1I1/DNM1/KIF26A/HLA-DQB1/CD74
REACTOME_PEROXISOMAL_PROTEIN_IMPORT	REACTOME_PEROXISOMAL_PROTEIN_IMPORT	35	-0.287639	-0.977733	0.515464	1	0.947599	1879	tags=46%, list=23%, signal=35%	PEX13/IDE/ACOT2/PHYH/CROT/EHHADH/IDH1/SCP2/ECI2/NUDT19/UBE2D1/PEX12/GSTK1/NUDT7/SLC27A2/ACOX2
REACTOME_FANCONI_ANEMIA_PATHWAY	REACTOME_FANCONI_ANEMIA_PATHWAY	22	0.431113	0.975644	0.518171	1	0.947599	1545	tags=32%, list=19%, signal=26%	FANCD2/FANCI/FANCA/FANCG/FANCE/EME1/ERCC1
REACTOME_SIGNALLING_TO_RAS	REACTOME_SIGNALLING_TO_RAS	14	0.462597	0.975512	0.529851	1	0.947599	3180	tags=64%, list=40%, signal=39%	NGF/SHC3/MAPK11/SHC2/MAPK13/MAPK12/RALGDS/SRC/MAPKAPK3
REACTOME_MITOTIC_PROMETAPHASE	REACTOME_MITOTIC_PROMETAPHASE	89	0.378488	0.975456	0.554639	1	0.947599	2189	tags=27%, list=27%, signal=20%	SPC24/BIRC5/CENPE/CENPM/DYNC1I1/CCNB2/ZWINT/HAUS5/SGO2/CENPO/SGO1/CENPL/CEP131/PCNT/MZT2A/CEP192/NCAPD2/MZT2B/KNTC1/HAUS8/TUBB2B/CEP164/TUBA4A/RPS27
REACTOME_P130CAS_LINKAGE_TO_MAPK_SIGNALING_FOR_INTEGRINS	REACTOME_P130CAS_LINKAGE_TO_MAPK_SIGNALING_FOR_INTEGRINS	13	0.468272	0.974429	0.528061	1	0.947599	87	tags=8%, list=1%, signal=8%	VWF
REACTOME_GLUTATHIONE_CONJUGATION	REACTOME_GLUTATHIONE_CONJUGATION	12	-0.355689	-0.973641	0.487069	1	0.947599	1185	tags=50%, list=15%, signal=43%	MGST1/GSTA1/GSTA2/MGST2/GSTK1/GGT1
REACTOME_ACTIVATION_OF_THE_MRNA_UPON_BINDING_OF_THE_CAP_BINDING_COMPLEX_AND_EIFS_AND_SUBSEQUENT_BINDING_TO_43S	REACTOME_ACTIVATION_OF_THE_MRNA_UPON_BINDING_OF_THE_CAP_BINDING_COMPLEX_AND_EIFS_AND_SUBSEQUENT_BINDING_TO_43S	35	-0.286388	-0.973482	0.515464	1	0.947599	3130	tags=69%, list=39%, signal=42%	EIF3A/EIF3F/RPS20/EIF4G1/RPS4X/RPS16/EIF3L/RPS3A/EIF2S1/EIF3K/EIF3D/RPS13/EIF3E/RPS7/RPS15A/EIF4A2/EIF3M/RPS14/EIF3H/RPS6/EIF3J/EIF2S2/RPS27L/EIF4A1
REACTOME_SYNTHESIS_OF_BILE_ACIDS_AND_BILE_SALTS	REACTOME_SYNTHESIS_OF_BILE_ACIDS_AND_BILE_SALTS	17	-0.314826	-0.972019	0.497238	1	0.947599	1766	tags=47%, list=22%, signal=37%	AKR1C3/AKR1C1/SCP2/CYP7B1/AKR1C2/CYP39A1/SLC27A2/ACOX2
REACTOME_ERK_MAPK_TARGETS	REACTOME_ERK_MAPK_TARGETS	16	-0.323062	-0.97127	0.5	1	0.947599	1720	tags=38%, list=21%, signal=30%	PPP2CB/PPP2CA/RPS6KA3/VRK3/RPS6KA5/MEF2C
REACTOME_B_WICH_COMPLEX_POSITIVELY_REGULATES_RRNA_EXPRESSION	REACTOME_B_WICH_COMPLEX_POSITIVELY_REGULATES_RRNA_EXPRESSION	13	0.466689	0.971136	0.530612	1	0.947599	441	tags=8%, list=5%, signal=7%	KAT2B
REACTOME_CELL_CYCLE_MITOTIC	REACTOME_CELL_CYCLE_MITOTIC	238	0.363395	0.97107	0.595405	1	0.947599	2204	tags=26%, list=27%, signal=19%	SPC24/GTSE1/UBE2C/KIF20A/MCM10/BIRC5/CENPE/CCNA1/CENPM/ESPL1/CDC25A/DYNC1I1/CDC25C/GINS2/CCNB2/ZWINT/E2F1/HAUS5/CDC6/AURKA/TK1/PTTG1/CCNE2/SGO2/NUP210/PPP1R12B/CDC25B/CENPO/MCM2/ANAPC15/CHMP6/CDT1/SGO1/MCM5/CENPL/CEP131/GINS1/TYMS/PCNT/MZT2A/NCAPG2/PRKCA/CEP192/POLA2/UBE2S/VRK1/MCM8/LIN54/NCAPD2/MZT2B/POLE/KNTC1/HAUS8/NCAPH2/TUBB2B/POLD1/FBXL18/CEP164/TUBA4A/RPS27/PKMYT1
REACTOME_ATTENUATION_PHASE	REACTOME_ATTENUATION_PHASE	16	0.449201	0.969672	0.541769	1	0.947599	1645	tags=25%, list=20%, signal=20%	HSPA6/COL4A6/HSPA2/HSPA1A
REACTOME_SIGNALING_BY_TGFB_FAMILY_MEMBERS	REACTOME_SIGNALING_BY_TGFB_FAMILY_MEMBERS	81	0.378283	0.967	0.578238	1	0.947599	1518	tags=19%, list=19%, signal=15%	NOG/GREM2/FBN1/ACVR1C/AMHR2/SMAD9/COL1A2/LTBP4/TGIF2/ITGB3/TCF4/FOXH1/PARD6A/LTBP2/SMAD6
REACTOME_UCH_PROTEINASES	REACTOME_UCH_PROTEINASES	43	-0.279816	-0.96689	0.556962	1	0.947599	2070	tags=30%, list=26%, signal=23%	PSMD5/ACTL6A/PSMA5/PSMD12/PSMA1/PSMC6/PSMB2/PSMA4/PSMA3/PSMB8/SENP8/PSMA2/PSMA6
REACTOME_RHOBTB1_GTPASE_CYCLE	REACTOME_RHOBTB1_GTPASE_CYCLE	11	-0.36341	-0.965892	0.5	1	0.947599	5127	tags=73%, list=64%, signal=26%	RNF20/ROCK2/TXNL1/CUL3/HNRNPC/SRRM1/COPS2/RHOBTB1
REACTOME_INTERLEUKIN_12_SIGNALING	REACTOME_INTERLEUKIN_12_SIGNALING	17	-0.312646	-0.965288	0.508287	1	0.947599	2865	tags=53%, list=36%, signal=34%	PAK2/RAP1B/SOD1/SNRPA1/RALA/CAPZA1/JAK1/GSTA2/MIF
REACTOME_SARS_COV_1_INFECTION	REACTOME_SARS_COV_1_INFECTION	80	-0.24112	-0.96352	0.505333	1	0.947599	2792	tags=49%, list=35%, signal=32%	UVRAG/RPS13/ITCH/PPIG/RB1/UBA52/EEF1A1/SUMO1/RPS7/SP1/PIK3C3/YWHAZ/RPS15A/PARP9/YWHAG/TOMM70/CHMP3/PIK3R4/RPS14/TBK1/RPS6/KPNA2/YWHAB/GALNT1/MAP1LC3B/RIPK1/CANX/PSMC6/SFN/RPS27L/YWHAQ/IFIH1/CHMP2B/ZCRB1/RUNX1/TMPRSS2/ACE2/NMI/CASP1
REACTOME_RNA_POLYMERASE_II_TRANSCRIBES_SNRNA_GENES	REACTOME_RNA_POLYMERASE_II_TRANSCRIBES_SNRNA_GENES	39	0.395782	0.96316	0.549727	1	0.947599	29	tags=3%, list=0%, signal=3%	ELL3
REACTOME_PRE_NOTCH_EXPRESSION_AND_PROCESSING	REACTOME_PRE_NOTCH_EXPRESSION_AND_PROCESSING	31	0.403677	0.962257	0.545251	1	0.947599	1400	tags=19%, list=17%, signal=16%	ATP2A3/KAT2B/E2F1/ST3GAL4/LFNG/RFNG
REACTOME_DCC_MEDIATED_ATTRACTIVE_SIGNALING	REACTOME_DCC_MEDIATED_ATTRACTIVE_SIGNALING	12	0.471823	0.961038	0.544156	1	0.947599	738	tags=17%, list=9%, signal=15%	DCC/ABLIM2
REACTOME_SIGNALING_BY_ERBB2_IN_CANCER	REACTOME_SIGNALING_BY_ERBB2_IN_CANCER	11	0.477908	0.96066	0.546875	1	0.947599	262	tags=9%, list=3%, signal=9%	NRG3
REACTOME_SEMA4D_IN_SEMAPHORIN_SIGNALING	REACTOME_SEMA4D_IN_SEMAPHORIN_SIGNALING	14	-0.339859	-0.960478	0.530303	1	0.947599	89	tags=21%, list=1%, signal=21%	RAC1/MYL12B/MYH11
REACTOME_INTERLEUKIN_6_FAMILY_SIGNALING	REACTOME_INTERLEUKIN_6_FAMILY_SIGNALING	10	-0.375588	-0.960011	0.489796	1	0.947599	1353	tags=30%, list=17%, signal=25%	JAK1/CRLF1/IL11
REACTOME_ANTI_INFLAMMATORY_RESPONSE_FAVOURING_LEISHMANIA_PARASITE_INFECTION	REACTOME_ANTI_INFLAMMATORY_RESPONSE_FAVOURING_LEISHMANIA_PARASITE_INFECTION	35	0.398621	0.959476	0.564641	1	0.947599	1843	tags=34%, list=23%, signal=27%	GNAZ/ADCY2/ADCY1/GNG11/GNG4/ADCY3/ITPR1/ADCY7/ADCY8/GNG2/FYN/ADCY9
REACTOME_SIGNALING_BY_WNT	REACTOME_SIGNALING_BY_WNT	138	0.363858	0.95686	0.592145	1	0.947599	1693	tags=19%, list=21%, signal=15%	SRY/TERT/WNT7B/AXIN2/PRKCG/DKK1/HECW1/GNAO1/WNT9A/PRICKLE1/CXXC4/GNG11/GNG4/ITPR1/PORCN/TCF4/KMT2D/WNT11/PARD6A/TRRAP/GNG2/FZD1/RNF43/PRKCA/TCF7/DVL1
REACTOME_REGULATION_OF_MITF_M_DEPENDENT_GENES_INVOLVED_IN_PIGMENTATION	REACTOME_REGULATION_OF_MITF_M_DEPENDENT_GENES_INVOLVED_IN_PIGMENTATION	20	-0.3036	-0.956118	0.524691	1	0.947599	384	tags=15%, list=5%, signal=14%	MLPH/LEF1/MYRIP
REACTOME_CILIUM_ASSEMBLY	REACTOME_CILIUM_ASSEMBLY	86	0.37139	0.954521	0.592363	1	0.947599	2910	tags=49%, list=36%, signal=32%	SSTR3/BBS1/CNGA4/HAUS5/NPHP1/KIF17/WDR35/SCLT1/PKD1/CEP131/INPP5E/B9D1/PCNT/IFT81/CEP192/WDR19/NPHP4/FBF1/ARL13B/MARK4/SMO/IFT172/HAUS8/TUBB2B/RAB11FIP3/CEP164/TUBA4A/MKS1/PDE6D/HDAC6/B9D2/CEP290/ARL3/TUBA1A/IFT140/KIF3A/SFI1/ARL6/KIF3C/CEP41/NINL/HAUS1
REACTOME_CDC42_GTPASE_CYCLE	REACTOME_CDC42_GTPASE_CYCLE	82	0.372772	0.954076	0.596074	1	0.947599	2786	tags=49%, list=35%, signal=32%	PLEKHG4B/TIAM1/SH3PXD2A/DOCK10/WAS/ARHGEF25/ARHGAP33/SRGAP2/CDC42EP5/ARHGEF19/MCF2L/RASGRF2/ARAP3/FGD1/PARD6A/ARHGAP22/PREX1/SRGAP1/ARHGAP45/FNBP1/CDC42EP4/ITSN1/SRGAP3/ARHGDIA/FGD4/PLEKHG1/ARHGEF9/BAIAP2/PLEKHG3/SCRIB/ARHGAP4/ARHGAP31/ARAP1/ARHGEF26/ARHGAP39/GIT1/DOCK6/CAV1/DOCK9/TRIO
REACTOME_REGULATION_OF_MECP2_EXPRESSION_AND_ACTIVITY	REACTOME_REGULATION_OF_MECP2_EXPRESSION_AND_ACTIVITY	17	0.436203	0.952661	0.551766	1	0.947599	2553	tags=35%, list=32%, signal=24%	CAMK2B/GPS2/HIPK2/AGO4/NCOR2/TNRC6C
REACTOME_SLC_TRANSPORTER_DISORDERS	REACTOME_SLC_TRANSPORTER_DISORDERS	41	0.390598	0.950876	0.581599	1	0.947599	1336	tags=17%, list=17%, signal=14%	SLC17A8/SLC6A19/GCK/SLC24A4/NUP210/SLCO2A1/SLC2A1
REACTOME_RSV_HOST_INTERACTIONS	REACTOME_RSV_HOST_INTERACTIONS	43	-0.275031	-0.950355	0.582278	1	0.947599	1353	tags=21%, list=17%, signal=18%	JAK1/ELOC/MED17/IFIH1/GPC3/GPC4/CX3CR1/TLR2/TLR6
REACTOME_SYNTHESIS_OF_VERY_LONG_CHAIN_FATTY_ACYL_COAS	REACTOME_SYNTHESIS_OF_VERY_LONG_CHAIN_FATTY_ACYL_COAS	13	-0.341795	-0.948446	0.522936	1	0.947599	2508	tags=62%, list=31%, signal=42%	HACD3/ACSL1/ELOVL7/ACSL4/ELOVL5/HACD1/TECR/HSD17B12
REACTOME_HEMOSTASIS	REACTOME_HEMOSTASIS	266	0.353895	0.94794	0.673327	1	0.947599	1369	tags=19%, list=17%, signal=16%	VWF/MYB/LCK/PDE1B/DGKB/ITGA4/KIF20A/KIF4A/PRKCG/ATP2A3/CENPE/PDE10A/TRPC7/KIF19/SLC8A3/ATP2B2/P2RX6/KIF5A/KIFC1/PDE2A/DOCK10/CD177/MPIG6B/RASGRP1/SCG3/MMRN1/KIF26A/RARRES2/SPN/DOCK3/ADRA2C/SLC16A8/GNG11/GNG4/CD244/KCNMB4/RAPGEF4/COL1A2/CD74/L1CAM/F13A1/KIF6/ITGB3/KIF12/SDC3/ITPR1/DGKG/APOH/KLC1/THBS1
REACTOME_TRANSPORT_TO_THE_GOLGI_AND_SUBSEQUENT_MODIFICATION	REACTOME_TRANSPORT_TO_THE_GOLGI_AND_SUBSEQUENT_MODIFICATION	98	0.364616	0.947794	0.604082	1	0.947599	877	tags=10%, list=11%, signal=9%	MGAT4C/CHST8/GRIA1/CNIH2/INS/DYNC1I1/ANK1/FUT3/SPTBN4/ANK2
REACTOME_EUKARYOTIC_TRANSLATION_ELONGATION	REACTOME_EUKARYOTIC_TRANSLATION_ELONGATION	44	-0.273068	-0.947352	0.578947	1	0.947599	4667	tags=64%, list=58%, signal=27%	RPS4X/RPS16/RPL6/EEF1B2/RPL21/RPL9/RPS3A/RPL14/RPL4/RPL32/RPS13/RPL19/RPL28/RPL7/UBA52/EEF1A1/RPS7/RPL37/RPL5/RPS15A/RPL15/RPS14/RPL24/RPL23/RPS6/RPL39L/RPS27L/RPL26L1
REACTOME_SOMITOGENESIS	REACTOME_SOMITOGENESIS	27	-0.288426	-0.94688	0.51938	1	0.947599	1343	tags=44%, list=17%, signal=37%	PSMA5/PSMD12/PSMA1/PSMC6/RBPJ/PSMB2/PSMA4/PSMA3/PSMB8/PSMA2/PSMA6/LEF1
REACTOME_METABOLISM_OF_WATER_SOLUBLE_VITAMINS_AND_COFACTORS	REACTOME_METABOLISM_OF_WATER_SOLUBLE_VITAMINS_AND_COFACTORS	61	-0.254364	-0.946501	0.6875	1	0.947599	1405	tags=34%, list=17%, signal=29%	MTHFD2/RFK/PC/PPCS/PDZD11/MMAA/NMNAT1/MTHFS/PRSS1/TPK1/LMBRD1/SLC25A19/NAMPT/AMN/PRSS3/SLC2A3/ENPP2/PTGIS/TCN1/ACP5/SLC52A3
REACTOME_COLLAGEN_FORMATION	REACTOME_COLLAGEN_FORMATION	41	0.388683	0.946215	0.58379	1	0.947599	1385	tags=34%, list=17%, signal=28%	COL19A1/COL13A1/COL9A1/COL25A1/LOXL3/COL16A1/COL4A6/COL27A1/LOXL2/COL1A2/COL12A1/COL9A2/COL4A1/COL4A2
REACTOME_ABERRANT_REGULATION_OF_MITOTIC_G1_S_TRANSITION_IN_CANCER_DUE_TO_RB1_DEFECTS	REACTOME_ABERRANT_REGULATION_OF_MITOTIC_G1_S_TRANSITION_IN_CANCER_DUE_TO_RB1_DEFECTS	10	0.476253	0.942911	0.560106	1	0.947599	946	tags=20%, list=12%, signal=18%	E2F1/CCNE2
REACTOME_DISEASES_OF_PROGRAMMED_CELL_DEATH	REACTOME_DISEASES_OF_PROGRAMMED_CELL_DEATH	23	0.412055	0.941124	0.569606	1	0.947599	2550	tags=48%, list=32%, signal=33%	CDC25A/CDC25C/CDC25B/RIPK3/POLA2/DNMT3B/TRADD/FADD/TRAF2/DNMT3A/CDK5R1
REACTOME_TCF_DEPENDENT_SIGNALING_IN_RESPONSE_TO_WNT	REACTOME_TCF_DEPENDENT_SIGNALING_IN_RESPONSE_TO_WNT	90	0.363684	0.939925	0.619342	1	0.947599	476	tags=6%, list=6%, signal=5%	SRY/TERT/AXIN2/DKK1/HECW1
REACTOME_MOLECULES_ASSOCIATED_WITH_ELASTIC_FIBRES	REACTOME_MOLECULES_ASSOCIATED_WITH_ELASTIC_FIBRES	19	0.425662	0.939468	0.56438	1	0.947599	1560	tags=37%, list=19%, signal=30%	EMILIN3/FBN1/FBN3/LTBP4/ITGB3/LTBP2/MFAP2
REACTOME_RESOLUTION_OF_ABASIC_SITES_AP_SITES	REACTOME_RESOLUTION_OF_ABASIC_SITES_AP_SITES	16	0.434424	0.937773	0.578624	1	0.947599	2650	tags=50%, list=33%, signal=34%	NEIL1/NTHL1/XRCC1/PNKP/POLE/POLD1/SMUG1/MUTYH
REACTOME_HDACS_DEACETYLATE_HISTONES	REACTOME_HDACS_DEACETYLATE_HISTONES	19	0.424282	0.936423	0.56799	1	0.947599	2368	tags=32%, list=29%, signal=22%	HDAC10/SAP30/GPS2/MTA1/CHD3/NCOR2
REACTOME_DNA_DAMAGE_TELOMERE_STRESS_INDUCED_SENESCENCE	REACTOME_DNA_DAMAGE_TELOMERE_STRESS_INDUCED_SENESCENCE	18	0.427508	0.935253	0.568651	1	0.947599	2283	tags=33%, list=28%, signal=24%	CCNA1/CCNE2/CABIN1/KAT5/EP400/HMGA1
REACTOME_OVARIAN_TUMOR_DOMAIN_PROTEASES	REACTOME_OVARIAN_TUMOR_DOMAIN_PROTEASES	15	-0.317614	-0.93469	0.541667	1	0.947599	1996	tags=53%, list=25%, signal=40%	ZRANB1/YOD1/OTUD3/RIPK1/VCPIP1/RNF128/IFIH1/UBE2D1
REACTOME_SARS_COV_1_HOST_INTERACTIONS	REACTOME_SARS_COV_1_HOST_INTERACTIONS	57	-0.250027	-0.934012	0.6	1	0.947599	2768	tags=44%, list=34%, signal=29%	RPS13/ITCH/PPIG/UBA52/EEF1A1/RPS7/SP1/YWHAZ/RPS15A/YWHAG/TOMM70/RPS14/TBK1/RPS6/KPNA2/YWHAB/RIPK1/PSMC6/SFN/RPS27L/YWHAQ/IFIH1/RUNX1/NMI/CASP1
REACTOME_TP53_REGULATES_TRANSCRIPTION_OF_SEVERAL_ADDITIONAL_CELL_DEATH_GENES_WHOSE_SPECIFIC_ROLES_IN_P53_DEPENDENT_APOPTOSIS_REMAIN_UNCERTAIN	REACTOME_TP53_REGULATES_TRANSCRIPTION_OF_SEVERAL_ADDITIONAL_CELL_DEATH_GENES_WHOSE_SPECIFIC_ROLES_IN_P53_DEPENDENT_APOPTOSIS_REMAIN_UNCERTAIN	11	0.464429	0.933566	0.579427	1	0.947599	257	tags=9%, list=3%, signal=9%	BIRC5
REACTOME_INTERLEUKIN_RECEPTOR_SHC_SIGNALING	REACTOME_INTERLEUKIN_RECEPTOR_SHC_SIGNALING	12	-0.340929	-0.933238	0.530172	1	0.947599	1353	tags=33%, list=17%, signal=28%	JAK1/PIK3CB/IL3RA/IL2RG
REACTOME_RHOH_GTPASE_CYCLE	REACTOME_RHOH_GTPASE_CYCLE	22	0.411308	0.930824	0.568581	1	0.947599	743	tags=9%, list=9%, signal=8%	LCK/ZAP70
REACTOME_RAF_ACTIVATION	REACTOME_RAF_ACTIVATION	23	0.407361	0.930404	0.576566	1	0.947599	186	tags=4%, list=2%, signal=4%	CAMK2B
REACTOME_SIGNALING_BY_PDGFR_IN_DISEASE	REACTOME_SIGNALING_BY_PDGFR_IN_DISEASE	10	-0.36394	-0.930237	0.514286	1	0.947599	3542	tags=90%, list=44%, signal=50%	SOS1/KRAS/WDR48/STAT3/PIK3CA/GOLGA4/FIP1L1/PIK3CB/ETV6
REACTOME_SYNTHESIS_OF_SUBSTRATES_IN_N_GLYCAN_BIOSYTHESIS	REACTOME_SYNTHESIS_OF_SUBSTRATES_IN_N_GLYCAN_BIOSYTHESIS	31	0.389395	0.928213	0.586592	1	0.947599	237	tags=6%, list=3%, signal=6%	ST8SIA1/ST8SIA5
REACTOME_MITF_M_REGULATED_MELANOCYTE_DEVELOPMENT	REACTOME_MITF_M_REGULATED_MELANOCYTE_DEVELOPMENT	57	0.371311	0.927973	0.631468	1	0.947599	457	tags=5%, list=6%, signal=5%	TBX2/TERT/BCL2
REACTOME_RNA_POLYMERASE_I_TRANSCRIPTION_TERMINATION	REACTOME_RNA_POLYMERASE_I_TRANSCRIPTION_TERMINATION	13	-0.334354	-0.9278	0.541284	1	0.947599	4432	tags=62%, list=55%, signal=28%	MNAT1/POLR1D/TAF1A/TBP/GTF2H1/TAF1D/TTF1/CCNH
REACTOME_SIGNALING_BY_PDGF	REACTOME_SIGNALING_BY_PDGF	30	0.391798	0.927386	0.598647	1	0.947599	1651	tags=23%, list=21%, signal=19%	COL9A1/SPP1/COL9A2/COL4A1/THBS1/COL4A2/COL4A5
REACTOME_SHC1_EVENTS_IN_ERBB2_SIGNALING	REACTOME_SHC1_EVENTS_IN_ERBB2_SIGNALING	11	0.460613	0.925895	0.580729	1	0.947599	262	tags=9%, list=3%, signal=9%	NRG3
REACTOME_DEGRADATION_OF_DVL	REACTOME_DEGRADATION_OF_DVL	29	-0.281341	-0.925594	0.52459	1	0.947599	1736	tags=34%, list=22%, signal=27%	PSMA5/PSMD12/PSMA1/PSMC6/PSMB2/PSMA4/PSMA3/PSMB8/PSMA2/PSMA6
REACTOME_RHO_GTPASES_ACTIVATE_PAKS	REACTOME_RHO_GTPASES_ACTIVATE_PAKS	12	-0.337549	-0.923985	0.543103	1	0.947599	89	tags=25%, list=1%, signal=25%	RAC1/MYL12B/MYH11
REACTOME_EVASION_BY_RSV_OF_HOST_INTERFERON_RESPONSES	REACTOME_EVASION_BY_RSV_OF_HOST_INTERFERON_RESPONSES	12	-0.337316	-0.923349	0.543103	1	0.947599	5337	tags=100%, list=66%, signal=34%	CREBBP/STAT2/TYK2/MAVS/IFNAR1/EIF2AK2/CUL5/UBA52/JAK1/ELOC/IFIH1
REACTOME_RNA_POLYMERASE_III_TRANSCRIPTION_INITIATION_FROM_TYPE_1_PROMOTER	REACTOME_RNA_POLYMERASE_III_TRANSCRIPTION_INITIATION_FROM_TYPE_1_PROMOTER	14	-0.326195	-0.921861	0.565657	1	0.947599	5427	tags=100%, list=67%, signal=33%	POLR3E/POLR3D/POLR3K/GTF3C1/POLR2E/POLR3A/GTF3C6/POLR1D/GTF3C2/TBP/GTF3C3/GTF3A/POLR3G
REACTOME_MATURATION_OF_SPIKE_PROTEIN	REACTOME_MATURATION_OF_SPIKE_PROTEIN	18	0.421164	0.921373	0.589307	1	0.947599	1173	tags=17%, list=15%, signal=14%	MGAT4C/ZDHHC11/ST3GAL4
REACTOME_RHO_GTPASES_ACTIVATE_ROCKS	REACTOME_RHO_GTPASES_ACTIVATE_ROCKS	10	-0.358453	-0.916214	0.530612	1	0.947599	89	tags=20%, list=1%, signal=20%	MYL12B/MYH11
REACTOME_CELL_JUNCTION_ORGANIZATION	REACTOME_CELL_JUNCTION_ORGANIZATION	52	0.368354	0.915962	0.629947	1	0.947599	1465	tags=19%, list=18%, signal=16%	PRDM8/CDH18/CDH8/CLDN11/CLDN19/SDK1/PARD6A/LIMS2/SDK2/CDH6
REACTOME_RAP1_SIGNALLING	REACTOME_RAP1_SIGNALLING	11	0.455344	0.915303	0.59375	1	0.947599	1130	tags=27%, list=14%, signal=23%	RASGRP1/RAPGEF4/RAP1GAP2
REACTOME_RHO_GTPASE_EFFECTORS	REACTOME_RHO_GTPASE_EFFECTORS	129	0.349219	0.915237	0.678499	1	0.947599	1693	tags=19%, list=21%, signal=16%	SPC24/BIRC5/CENPE/CIT/DLG4/KIF5A/CENPM/DYNC1I1/CDC25C/ZWINT/WAS/SGO2/PPP1R12B/RHPN1/SRGAP2/CENPO/SGO1/PIN1/KLC1/CENPL/MAPK11/MYH10/PRKCA/PPP1R14A/DVL1
REACTOME_KERATAN_SULFATE_BIOSYNTHESIS	REACTOME_KERATAN_SULFATE_BIOSYNTHESIS	14	0.433846	0.914881	0.589552	1	0.947599	1246	tags=36%, list=15%, signal=30%	ACAN/B3GNT7/CHST6/ST3GAL4/B3GNT4
REACTOME_CASPASE_ACTIVATION_VIA_EXTRINSIC_APOPTOTIC_SIGNALLING_PATHWAY	REACTOME_CASPASE_ACTIVATION_VIA_EXTRINSIC_APOPTOTIC_SIGNALLING_PATHWAY	13	0.439066	0.913654	0.604592	1	0.947599	493	tags=15%, list=6%, signal=14%	DCC/UNC5A
REACTOME_SIGNALING_BY_BRAF_AND_RAF1_FUSIONS	REACTOME_SIGNALING_BY_BRAF_AND_RAF1_FUSIONS	44	0.373363	0.913041	0.642549	1	0.947599	711	tags=7%, list=9%, signal=6%	VWF/CAMK2B/KSR2
REACTOME_FORMATION_OF_INCISION_COMPLEX_IN_GG_NER	REACTOME_FORMATION_OF_INCISION_COMPLEX_IN_GG_NER	21	-0.283705	-0.912948	0.585987	1	0.947599	2786	tags=48%, list=35%, signal=31%	UBE2N/UBA52/SUMO1/ERCC4/GTF2H1/RPA3/UBE2V2/USP45/DDB2/CCNH
REACTOME_G2_M_CHECKPOINTS	REACTOME_G2_M_CHECKPOINTS	63	0.362385	0.911993	0.649582	1	0.947599	839	tags=11%, list=10%, signal=10%	GTSE1/MCM10/CDC25A/CDC25C/CCNB2/CDC6/RMI2
REACTOME_CELLULAR_SENESCENCE	REACTOME_CELLULAR_SENESCENCE	68	0.360129	0.910684	0.660042	1	0.947599	2659	tags=40%, list=33%, signal=27%	UBE2C/CCNA1/CXCL8/E2F1/CCNE2/MAP2K6/ANAPC15/PHC1/MAPK10/MAPK11/UBE2S/CABIN1/ID1/EHMT2/KAT5/CBX2/CBX6/EP400/HMGA1/AGO4/RPS6KA2/RING1/KDM6B/TNRC6C/MAP2K7/NFKB1/CDKN1B
REACTOME_PKMTS_METHYLATE_HISTONE_LYSINES	REACTOME_PKMTS_METHYLATE_HISTONE_LYSINES	24	0.397115	0.910602	0.602312	1	0.947599	2852	tags=46%, list=35%, signal=30%	PRDM16/KMT2D/NSD2/EHMT2/KMT2B/ASH1L/SETD1B/KMT5C/KMT2A/NFKB1/SETD1A
REACTOME_HEDGEHOG_LIGAND_BIOGENESIS	REACTOME_HEDGEHOG_LIGAND_BIOGENESIS	30	-0.276083	-0.910559	0.582609	1	0.947599	1736	tags=37%, list=22%, signal=29%	PSMA5/SEL1L/PSMD12/PSMA1/PSMC6/PSMB2/PSMA4/PSMA3/PSMB8/PSMA2/PSMA6
REACTOME_EXTRA_NUCLEAR_ESTROGEN_SIGNALING	REACTOME_EXTRA_NUCLEAR_ESTROGEN_SIGNALING	29	0.387853	0.909754	0.623864	1	0.947599	1510	tags=21%, list=19%, signal=17%	MMP2/BCL2/GNG11/GNG4/SPHK1/GNG2
REACTOME_REGULATION_OF_GLUCOKINASE_BY_GLUCOKINASE_REGULATORY_PROTEIN	REACTOME_REGULATION_OF_GLUCOKINASE_BY_GLUCOKINASE_REGULATORY_PROTEIN	17	0.416451	0.909524	0.605359	1	0.947599	1054	tags=12%, list=13%, signal=10%	GCK/NUP210
REACTOME_DEGRADATION_OF_BETA_CATENIN_BY_THE_DESTRUCTION_COMPLEX	REACTOME_DEGRADATION_OF_BETA_CATENIN_BY_THE_DESTRUCTION_COMPLEX	46	-0.254423	-0.908773	0.643836	1	0.947599	2070	tags=37%, list=26%, signal=28%	PSMD5/ZRANB1/TCF7L2/PSMA5/PPP2CB/PPP2CA/PSMD12/PSMA1/PSMC6/PSMB2/PSMA4/SKP1/PSMA3/PSMB8/PSMA2/PSMA6/LEF1
REACTOME_REPRESSION_OF_WNT_TARGET_GENES	REACTOME_REPRESSION_OF_WNT_TARGET_GENES	10	0.457983	0.906738	0.608983	1	0.947599	250	tags=10%, list=3%, signal=10%	AXIN2
REACTOME_TRANS_GOLGI_NETWORK_VESICLE_BUDDING	REACTOME_TRANS_GOLGI_NETWORK_VESICLE_BUDDING	38	-0.268968	-0.906456	0.670588	1	0.947599	2856	tags=55%, list=35%, signal=36%	HSPA8/SH3D19/TGOLN2/YIPF6/CLTA/AP1M2/SNX5/NAPA/AP1G1/PICALM/CLINT1/CPD/CLTC/ACBD3/AP3S1/AP4E1/VAMP8/AP3B1/TPD52/TBC1D8B/GNS
REACTOME_CELL_EXTRACELLULAR_MATRIX_INTERACTIONS	REACTOME_CELL_EXTRACELLULAR_MATRIX_INTERACTIONS	11	-0.340758	-0.905686	0.564103	1	0.947599	1407	tags=36%, list=17%, signal=30%	LIMS1/RSU1/ITGB1/ARHGEF6
REACTOME_SYNTHESIS_OF_PC	REACTOME_SYNTHESIS_OF_PC	17	-0.292883	-0.904271	0.563536	1	0.947599	1050	tags=24%, list=13%, signal=21%	SLC44A3/SLC44A4/MFSD2A/CHKB
REACTOME_PLATELET_ACTIVATION_SIGNALING_AND_AGGREGATION	REACTOME_PLATELET_ACTIVATION_SIGNALING_AND_AGGREGATION	118	0.344953	0.90422	0.700708	1	0.947599	1643	tags=21%, list=20%, signal=17%	VWF/LCK/DGKB/PRKCG/TRPC7/MPIG6B/RASGRP1/SCG3/MMRN1/RARRES2/ADRA2C/GNG11/GNG4/RAPGEF4/COL1A2/F13A1/ITGB3/ITPR1/DGKG/APOH/THBS1/GNG2/VEGFB/FYN/PRKCA
REACTOME_RHOBTB_GTPASE_CYCLE	REACTOME_RHOBTB_GTPASE_CYCLE	18	-0.28712	-0.903952	0.586592	1	0.947599	5742	tags=100%, list=71%, signal=29%	MSI2/DBN1/SPEN/ACTN1/GPS1/RNF20/ROCK2/CCT6A/HSP90AB1/TXNL1/CUL3/HNRNPC/SRRM1/COPS2/TMOD3/TWF1/RHOBTB1
REACTOME_RETROGRADE_TRANSPORT_AT_THE_TRANS_GOLGI_NETWORK	REACTOME_RETROGRADE_TRANSPORT_AT_THE_TRANS_GOLGI_NETWORK	25	-0.274387	-0.902853	0.589552	1	0.947599	2912	tags=60%, list=36%, signal=38%	NAA35/TGOLN2/NAPA/COG2/GOLGA4/ARFIP2/ARL1/VAMP3/RAB9A/GCC2/RAB6A/STX6/COG5/SCOC/NSF
REACTOME_PROLONGED_ERK_ACTIVATION_EVENTS	REACTOME_PROLONGED_ERK_ACTIVATION_EVENTS	11	0.448815	0.90218	0.610677	1	0.947599	435	tags=9%, list=5%, signal=9%	NGF
REACTOME_GLYCOSPHINGOLIPID_CATABOLISM	REACTOME_GLYCOSPHINGOLIPID_CATABOLISM	14	-0.317952	-0.898566	0.580808	1	0.947599	2026	tags=57%, list=25%, signal=43%	ASAH2/ASAH1/ARSJ/GLB1/GM2A/GALC/ENPP7/NEU4
REACTOME_CARDIOGENESIS	REACTOME_CARDIOGENESIS	11	0.445956	0.896432	0.61849	1	0.947599	1109	tags=27%, list=14%, signal=24%	ISL1/MYOCD/TBX20
REACTOME_SUMOYLATION_OF_IMMUNE_RESPONSE_PROTEINS	REACTOME_SUMOYLATION_OF_IMMUNE_RESPONSE_PROTEINS	10	0.45244	0.895763	0.616909	1	0.947599	749	tags=10%, list=9%, signal=9%	IKBKE
REACTOME_TRANSLOCATION_OF_SLC2A4_GLUT4_TO_THE_PLASMA_MEMBRANE	REACTOME_TRANSLOCATION_OF_SLC2A4_GLUT4_TO_THE_PLASMA_MEMBRANE	37	-0.26323	-0.894797	0.652174	1	0.947599	2537	tags=46%, list=32%, signal=32%	EXOC8/YWHAZ/RALA/YWHAG/EXOC1/RAB14/RAC1/TBC1D4/YWHAB/PRKAB1/SFN/STXBP3/YWHAQ/TUBA1C/TBC1D1/SLC2A4/TUBAL3
REACTOME_TRANSCRIPTIONAL_REGULATION_OF_WHITE_ADIPOCYTE_DIFFERENTIATION	REACTOME_TRANSCRIPTIONAL_REGULATION_OF_WHITE_ADIPOCYTE_DIFFERENTIATION	36	0.370476	0.893757	0.633663	1	0.947599	72	tags=3%, list=1%, signal=3%	EBF1
REACTOME_SWITCHING_OF_ORIGINS_TO_A_POST_REPLICATIVE_STATE	REACTOME_SWITCHING_OF_ORIGINS_TO_A_POST_REPLICATIVE_STATE	43	0.365465	0.893261	0.652221	1	0.947599	1363	tags=19%, list=17%, signal=16%	UBE2C/CCNA1/CDC6/CCNE2/MCM2/ANAPC15/CDT1/MCM5
REACTOME_RHO_GTPASES_ACTIVATE_CIT	REACTOME_RHO_GTPASES_ACTIVATE_CIT	11	0.444175	0.892854	0.623698	1	0.947599	1078	tags=27%, list=13%, signal=24%	CIT/DLG4/PPP1R12B
REACTOME_INTERLEUKIN_4_AND_INTERLEUKIN_13_SIGNALING	REACTOME_INTERLEUKIN_4_AND_INTERLEUKIN_13_SIGNALING	36	0.369842	0.892228	0.634763	1	0.947599	1277	tags=19%, list=16%, signal=16%	MMP2/BIRC5/BCL2/CXCL8/COL1A2/F13A1/ZEB1
REACTOME_TRANSPORT_OF_SMALL_MOLECULES	REACTOME_TRANSPORT_OF_SMALL_MOLECULES	332	0.332818	0.892139	0.812188	1	0.947599	1563	tags=20%, list=19%, signal=17%	SLC5A8/TRPC4/ANO3/APOF/CYBRD1/TRPA1/CAMK2B/FXYD6/SLC17A8/PLN/ASIC4/LCN12/ATP2A3/SLC6A19/TRPC7/ABCG4/RYR2/KCNJ11/CLN3/SLC18A1/SLC8A3/SLC5A12/ATP2B2/TRPM5/SLC30A8/ANO4/SLC5A9/ATP6V1G2/SLC24A4/ARL2BP/LRRC8E/ADCY2/ADCY1/ANO7/ATP8B3/ABCA3/SLC27A1/SLC16A8/UNC79/CREB3L3/GNG11/ATP8A1/GNG4/TFR2/MICU3/SLCO2A1/ABCC2/SLC16A10/SLC9A3/ADCY3/ATP6V0E2/SLC2A1/SLC24A3/RYR1/SLC13A3/SLC44A2/ADCY7/ADCY8/CLCN4/NIPAL1/…
REACTOME_REGULATION_OF_NF_KAPPA_B_SIGNALING	REACTOME_REGULATION_OF_NF_KAPPA_B_SIGNALING	11	-0.335628	-0.892053	0.57265	1	0.947599	1867	tags=55%, list=23%, signal=42%	N4BP1/UBA52/USP14/CHUK/CASP8/IKBIP
REACTOME_HEDGEHOG_OFF_STATE	REACTOME_HEDGEHOG_OFF_STATE	60	0.355183	0.890369	0.676471	1	0.947599	2280	tags=33%, list=28%, signal=24%	GLI2/GLI1/ADCY2/ADCY1/PTCH1/WDR35/ADCY3/ADCY7/ADCY8/FUZ/KIF7/WDR19/ADCY9/SMO/IFT172/TUBB2B/ADCY6/TUBA4A/MKS1/SUFU
REACTOME_REGULATION_OF_MRNA_STABILITY_BY_PROTEINS_THAT_BIND_AU_RICH_ELEMENTS	REACTOME_REGULATION_OF_MRNA_STABILITY_BY_PROTEINS_THAT_BIND_AU_RICH_ELEMENTS	46	-0.249232	-0.890231	0.671233	1	0.947599	1736	tags=30%, list=22%, signal=24%	PSMA5/XRN1/YWHAB/PSMD12/ZFP36/PSMA1/EXOSC7/PSMC6/PSMB2/PSMA4/PSMA3/PSMB8/PSMA2/PSMA6
REACTOME_PTK6_REGULATES_RHO_GTPASES_RAS_GTPASE_AND_MAP_KINASES	REACTOME_PTK6_REGULATES_RHO_GTPASES_RAS_GTPASE_AND_MAP_KINASES	11	-0.33491	-0.890142	0.57265	1	0.947599	5356	tags=100%, list=67%, signal=33%	DOCK1/BCAR1/RASA1/ARHGAP35/ELMO2/KRAS/RHOA/CRK/RAC1/ELMO1
REACTOME_THE_PHOTOTRANSDUCTION_CASCADE	REACTOME_THE_PHOTOTRANSDUCTION_CASCADE	13	0.427211	0.888986	0.639031	1	0.947599	1643	tags=31%, list=20%, signal=25%	RGS9/PPEF1/GRK4/PRKCA
REACTOME_INSULIN_RECEPTOR_RECYCLING	REACTOME_INSULIN_RECEPTOR_RECYCLING	15	0.417263	0.888735	0.630864	1	0.947599	612	tags=13%, list=8%, signal=12%	INS/ATP6V1G2
REACTOME_CELL_DEATH_SIGNALLING_VIA_NRAGE_NRIF_AND_NADE	REACTOME_CELL_DEATH_SIGNALLING_VIA_NRAGE_NRIF_AND_NADE	44	0.362344	0.886095	0.671706	1	0.947599	2207	tags=36%, list=27%, signal=27%	TIAM1/NGF/BAD/ARHGEF40/ARHGEF19/MCF2L/RASGRF2/OBSCN/FGD1/PREX1/ARHGEF17/ITSN1/FGD4/PLEKHG5/ARHGEF9/ARHGEF2
REACTOME_RHOA_GTPASE_CYCLE	REACTOME_RHOA_GTPASE_CYCLE	77	0.347954	0.885631	0.695109	1	0.947599	3158	tags=51%, list=39%, signal=31%	TIAM1/CIT/ARHGEF25/ARHGAP8/RHPN1/MCAM/ARHGEF40/ARHGEF19/MCF2L/RASGRF2/OBSCN/ARAP3/ARHGAP22/PREX1/ARHGEF17/SRGAP1/ARHGAP45/ARHGDIA/PLEKHG5/ARHGAP19/ARHGEF2/PLEKHG3/ARHGEF28/ARHGAP4/ARHGAP31/ARAP1/KALRN/CAVIN1/ARHGAP39/STK10/CAV1/TRIO/FLOT1/ARHGEF1/ACTC1/MYO9B/ARHGEF7/ARHGAP20/ARHGEF11
REACTOME_SYNTHESIS_OF_DNA	REACTOME_SYNTHESIS_OF_DNA	54	0.354143	0.885421	0.684656	1	0.947599	1803	tags=24%, list=22%, signal=19%	UBE2C/CCNA1/GINS2/CDC6/CCNE2/MCM2/ANAPC15/CDT1/MCM5/GINS1/POLA2/UBE2S/MCM8
REACTOME_IMMUNOREGULATORY_INTERACTIONS_BETWEEN_A_LYMPHOID_AND_A_NON_LYMPHOID_CELL	REACTOME_IMMUNOREGULATORY_INTERACTIONS_BETWEEN_A_LYMPHOID_AND_A_NON_LYMPHOID_CELL	29	0.377415	0.88527	0.654545	1	0.947599	617	tags=17%, list=8%, signal=16%	CD96/ITGA4/PIANP/CD300A/CD226
REACTOME_SIGNALING_BY_NUCLEAR_RECEPTORS	REACTOME_SIGNALING_BY_NUCLEAR_RECEPTORS	105	0.339067	0.884946	0.71269	1	0.947599	590	tags=8%, list=7%, signal=7%	PGR/MYB/MMP2/CXCL12/ADH1A/KAT2B/BCL2/PDK4
REACTOME_GOLGI_ASSOCIATED_VESICLE_BIOGENESIS	REACTOME_GOLGI_ASSOCIATED_VESICLE_BIOGENESIS	36	-0.260786	-0.883469	0.698925	1	0.947599	3000	tags=56%, list=37%, signal=35%	HSPA8/SH3D19/TGOLN2/YIPF6/CLTA/AP1M2/SNX5/NAPA/AP1G1/PICALM/CLINT1/CPD/CLTC/ACBD3/AP3S1/AP4E1/VAMP8/AP3B1/TPD52/TBC1D8B
REACTOME_MAP2K_AND_MAPK_ACTIVATION	REACTOME_MAP2K_AND_MAPK_ACTIVATION	25	0.383353	0.882885	0.64977	1	0.947599	1274	tags=16%, list=16%, signal=14%	VWF/KSR2/ITGB3/IL17RD
REACTOME_SCF_SKP2_MEDIATED_DEGRADATION_OF_P27_P21	REACTOME_SCF_SKP2_MEDIATED_DEGRADATION_OF_P27_P21	31	-0.268233	-0.881748	0.635514	1	0.947599	1736	tags=35%, list=22%, signal=28%	PSMA5/PSMD12/PSMA1/PSMC6/PSMB2/PSMA4/SKP1/PSMA3/PSMB8/PSMA2/PSMA6
REACTOME_IRE1ALPHA_ACTIVATES_CHAPERONES	REACTOME_IRE1ALPHA_ACTIVATES_CHAPERONES	30	0.372192	0.880979	0.659526	1	0.947599	94	tags=3%, list=1%, signal=3%	EXTL1
REACTOME_TRANSCRIPTIONAL_REGULATION_OF_BROWN_AND_BEIGE_ADIPOCYTE_DIFFERENTIATION	REACTOME_TRANSCRIPTIONAL_REGULATION_OF_BROWN_AND_BEIGE_ADIPOCYTE_DIFFERENTIATION	13	0.423005	0.880235	0.649235	1	0.947599	3498	tags=62%, list=43%, signal=35%	PRDM16/MTA1/CHD3/MBD3/PPARGC1B/RXRA/CHD4/RBBP7
REACTOME_GLYCOSPHINGOLIPID_BIOSYNTHESIS	REACTOME_GLYCOSPHINGOLIPID_BIOSYNTHESIS	14	0.416996	0.879349	0.636816	1	0.947599	237	tags=7%, list=3%, signal=7%	ST8SIA5
REACTOME_REPRODUCTION	REACTOME_REPRODUCTION	34	0.364782	0.87811	0.648291	1	0.947599	1703	tags=32%, list=21%, signal=26%	CATSPER3/TEX15/IZUMO4/STAG3/HSPA2/REC8/PSMC3IP/CATSPERG/SYNE2/CXCR4/TFAP2C
REACTOME_PLASMA_LIPOPROTEIN_REMODELING	REACTOME_PLASMA_LIPOPROTEIN_REMODELING	12	0.428999	0.873812	0.642857	1	0.947599	138	tags=8%, list=2%, signal=8%	APOF
REACTOME_RESPIRATORY_SYNCYTIAL_VIRUS_INFECTION_PATHWAY	REACTOME_RESPIRATORY_SYNCYTIAL_VIRUS_INFECTION_PATHWAY	52	-0.234006	-0.871355	0.791045	1	0.947599	1353	tags=17%, list=17%, signal=14%	JAK1/ELOC/MED17/IFIH1/GPC3/GPC4/CX3CR1/TLR2/TLR6
REACTOME_INTRA_GOLGI_AND_RETROGRADE_GOLGI_TO_ER_TRAFFIC	REACTOME_INTRA_GOLGI_AND_RETROGRADE_GOLGI_TO_ER_TRAFFIC	105	0.333769	0.871117	0.740102	1	0.947599	1359	tags=13%, list=17%, signal=11%	KIF20A/KIF4A/CENPE/RAB39A/KIF19/KIF5A/KIFC1/DYNC1I1/KIF26A/PLA2G6/RAB36/KIF6/KIF12/KLC1
REACTOME_ENERGY_DEPENDENT_REGULATION_OF_MTOR_BY_LKB1_AMPK	REACTOME_ENERGY_DEPENDENT_REGULATION_OF_MTOR_BY_LKB1_AMPK	11	-0.327418	-0.870231	0.602564	1	0.947599	2019	tags=45%, list=25%, signal=34%	STRADB/CAB39/PRKAB1/RRAGC/PRKAA1
REACTOME_RHOJ_GTPASE_CYCLE	REACTOME_RHOJ_GTPASE_CYCLE	26	0.376072	0.869795	0.667051	1	0.947599	733	tags=8%, list=9%, signal=7%	RHOJ/WAS
REACTOME_FCGR3A_MEDIATED_IL10_SYNTHESIS	REACTOME_FCGR3A_MEDIATED_IL10_SYNTHESIS	23	0.380334	0.868675	0.656613	1	0.947599	2090	tags=39%, list=26%, signal=29%	ADCY2/ADCY1/ADCY3/ITPR1/ADCY7/ADCY8/FYN/ADCY9/ADCY6
REACTOME_SIGNAL_AMPLIFICATION	REACTOME_SIGNAL_AMPLIFICATION	12	0.425798	0.867292	0.653247	1	0.947599	1510	tags=25%, list=19%, signal=20%	GNG11/GNG4/GNG2
REACTOME_TNFR2_NON_CANONICAL_NF_KB_PATHWAY	REACTOME_TNFR2_NON_CANONICAL_NF_KB_PATHWAY	45	-0.246954	-0.86431	0.743243	1	0.947599	1736	tags=38%, list=22%, signal=30%	PSMA5/TNFRSF14/CHUK/PSMD12/PSMA1/PSMC6/TNFSF15/PSMB2/PSMA4/SKP1/BIRC3/PSMA3/CD40/PSMB8/TNFRSF18/PSMA2/PSMA6
REACTOME_SARS_COV_2_ACTIVATES_MODULATES_INNATE_AND_ADAPTIVE_IMMUNE_RESPONSES	REACTOME_SARS_COV_2_ACTIVATES_MODULATES_INNATE_AND_ADAPTIVE_IMMUNE_RESPONSES	61	-0.232263	-0.864261	0.791667	1	0.947599	2147	tags=33%, list=27%, signal=24%	TOMM70/CNBP/SEC23A/SEC24A/PIK3R4/TBK1/SAR1B/CHUK/KPNA2/ATG14/NUP93/JAK1/IFIH1/MASP1/HLA-B/HLA-F/NUP37/B2M/MBL2/TLR2
REACTOME_COOPERATION_OF_PDCL_PHLP1_AND_TRIC_CCT_IN_G_PROTEIN_BETA_FOLDING	REACTOME_COOPERATION_OF_PDCL_PHLP1_AND_TRIC_CCT_IN_G_PROTEIN_BETA_FOLDING	15	0.404624	0.861816	0.653086	1	0.947599	1510	tags=33%, list=19%, signal=27%	RGS9/GNG11/GNG4/RGS7/GNG2
REACTOME_ACTIVATION_OF_GENE_EXPRESSION_BY_SREBF_SREBP	REACTOME_ACTIVATION_OF_GENE_EXPRESSION_BY_SREBF_SREBP	16	-0.286306	-0.860766	0.62766	1	0.947599	1227	tags=56%, list=15%, signal=48%	NCOA2/TBL1XR1/GPAM/NFYB/SP1/HMGCS1/SC5D/IDI1/SQLE
REACTOME_RRNA_MODIFICATION_IN_THE_NUCLEUS_AND_CYTOSOL	REACTOME_RRNA_MODIFICATION_IN_THE_NUCLEUS_AND_CYTOSOL	33	0.358058	0.858736	0.677026	1	0.947599	111	tags=3%, list=1%, signal=3%	PWP2
REACTOME_INACTIVATION_OF_CSF3_G_CSF_SIGNALING	REACTOME_INACTIVATION_OF_CSF3_G_CSF_SIGNALING	14	-0.303597	-0.857997	0.661616	1	0.947599	3302	tags=71%, list=41%, signal=42%	SYK/CUL5/LYN/STAT3/RNF7/UBA52/STAT5A/JAK1/ELOC/UBE2D1
REACTOME_ANCHORING_OF_THE_BASAL_BODY_TO_THE_PLASMA_MEMBRANE	REACTOME_ANCHORING_OF_THE_BASAL_BODY_TO_THE_PLASMA_MEMBRANE	42	0.351268	0.857704	0.70185	1	0.947599	2910	tags=50%, list=36%, signal=32%	HAUS5/NPHP1/SCLT1/CEP131/B9D1/PCNT/CEP192/NPHP4/FBF1/MARK4/HAUS8/CEP164/TUBA4A/MKS1/B9D2/CEP290/TUBA1A/SFI1/CEP41/NINL/HAUS1
REACTOME_GAMMA_CARBOXYLATION_HYPUSINYLATION_HYDROXYLATION_AND_ARYLSULFATASE_ACTIVATION	REACTOME_GAMMA_CARBOXYLATION_HYPUSINYLATION_HYDROXYLATION_AND_ARYLSULFATASE_ACTIVATION	30	-0.259731	-0.856628	0.704348	1	0.947599	5965	tags=100%, list=74%, signal=26%	F8/TPST2/JMJD6/KDM8/U2AF2/DRG2/JMJD4/FN3K/RPL27A/RPL8/ARSA/DOHH/DNAJC24/RIOX1/DPH7/DRG1/GGCX/ICMT/DPH5/ASPH/RIOX2/ETF1/RWDD1/RPS6/ARSJ/ZC3H15/F2/PROS1/PROZ
REACTOME_ONCOGENIC_MAPK_SIGNALING	REACTOME_ONCOGENIC_MAPK_SIGNALING	55	0.341424	0.855124	0.725449	1	0.947599	1003	tags=9%, list=12%, signal=8%	VWF/CAMK2B/KSR2/SPRED3/DUSP9
REACTOME_REGULATION_OF_SIGNALING_BY_CBL	REACTOME_REGULATION_OF_SIGNALING_BY_CBL	13	-0.307838	-0.854221	0.633028	1	0.947599	3061	tags=69%, list=38%, signal=43%	SYK/LYN/PIK3CA/YES1/UBA52/CRK/PIK3R3/PIK3CB/BLNK
REACTOME_HEME_SIGNALING	REACTOME_HEME_SIGNALING	18	-0.270258	-0.850863	0.648045	1	0.947599	1717	tags=33%, list=21%, signal=26%	RORA/APOB/SIRT1/BACH1/APOA1/MEF2C
REACTOME_TIGHT_JUNCTION_INTERACTIONS	REACTOME_TIGHT_JUNCTION_INTERACTIONS	13	0.408056	0.849126	0.67602	1	0.947599	1431	tags=23%, list=18%, signal=19%	CLDN11/CLDN19/PARD6A
REACTOME_P75_NTR_RECEPTOR_MEDIATED_SIGNALLING	REACTOME_P75_NTR_RECEPTOR_MEDIATED_SIGNALLING	58	0.338688	0.849082	0.746849	1	0.947599	2786	tags=41%, list=35%, signal=27%	TIAM1/NGF/LINGO1/BAD/ARHGEF40/ARHGEF19/MCF2L/RASGRF2/OBSCN/FGD1/PREX1/ARHGEF17/ITSN1/ARHGDIA/FGD4/PLEKHG5/ARHGEF9/ARHGEF2/ARHGEF26/KALRN/IRAK1/NFKB1/TIAM2/TRIO
REACTOME_SIGNALING_BY_RECEPTOR_TYROSINE_KINASES	REACTOME_SIGNALING_BY_RECEPTOR_TYROSINE_KINASES	263	0.316761	0.847717	0.864136	1	0.947599	1439	tags=15%, list=18%, signal=13%	PGR/COL9A1/LCK/CXCL12/FGF18/FGF9/INS/NRG3/ADAM12/GABRB2/TIAM1/CDK5R2/PTPRZ1/DLG4/NGF/SPP1/ATP6V1G2/FES/NTRK3/FLT4/ADORA2A/DNM1/DOCK3/COL27A1/ID4/SHC3/COL1A2/FLT1/COL9A2/HGFAC/ITGB3/ATP6V0E2/COL4A1/ITPR1/NTRK2/THBS1/COL4A2/GABRB3/FGF19
REACTOME_COPII_MEDIATED_VESICLE_TRANSPORT	REACTOME_COPII_MEDIATED_VESICLE_TRANSPORT	37	0.350422	0.847287	0.698901	1	0.947599	246	tags=5%, list=3%, signal=5%	GRIA1/CNIH2
REACTOME_RAF_INDEPENDENT_MAPK1_3_ACTIVATION	REACTOME_RAF_INDEPENDENT_MAPK1_3_ACTIVATION	16	0.392344	0.846937	0.668305	1	0.947599	3617	tags=69%, list=45%, signal=38%	DUSP2/DUSP9/DUSP7/IL6R/PEA15/MAP2K2/TYK2/MAPK3/DUSP10/DUSP16/JAK2
REACTOME_BIOSYNTHESIS_OF_THE_N_GLYCAN_PRECURSOR_DOLICHOL_LIPID_LINKED_OLIGOSACCHARIDE_LLO_AND_TRANSFER_TO_A_NASCENT_PROTEIN	REACTOME_BIOSYNTHESIS_OF_THE_N_GLYCAN_PRECURSOR_DOLICHOL_LIPID_LINKED_OLIGOSACCHARIDE_LLO_AND_TRANSFER_TO_A_NASCENT_PROTEIN	42	0.346816	0.846834	0.712731	1	0.947599	237	tags=5%, list=3%, signal=5%	ST8SIA1/ST8SIA5
REACTOME_TRANSFERRIN_ENDOCYTOSIS_AND_RECYCLING	REACTOME_TRANSFERRIN_ENDOCYTOSIS_AND_RECYCLING	15	-0.287599	-0.84636	0.682292	1	0.947599	368	tags=20%, list=5%, signal=19%	ATP6V0E1/TF/ATP6V1C2
REACTOME_TICAM1_RIP1_MEDIATED_IKK_COMPLEX_RECRUITMENT	REACTOME_TICAM1_RIP1_MEDIATED_IKK_COMPLEX_RECRUITMENT	10	-0.331005	-0.846055	0.604082	1	0.947599	1671	tags=60%, list=21%, signal=48%	UBE2N/UBA52/CHUK/RIPK1/BIRC3/UBE2D1
REACTOME_AEROBIC_RESPIRATION_AND_RESPIRATORY_ELECTRON_TRANSPORT	REACTOME_AEROBIC_RESPIRATION_AND_RESPIRATORY_ELECTRON_TRANSPORT	118	-0.206968	-0.84605	0.592681	1	0.947599	2659	tags=47%, list=33%, signal=32%	NDUFV3/OXA1L/VDAC1/COX11/UBA52/LDHB/SFXN4/UQCRB/HIGD2A/NDUFA2/ATP5PO/COX4I1/COX6C/IDH3G/ATP5MC3/NDUFA4/NDUFS5/WDR26/NDUFA6/SDHD/TMEM126B/MRPS36/COX15/MDH1/CYCS/NDUFA5/NDUFA10/TTC19/UQCRH/TIMMDC1/NDUFS4/NDUFC2/NDUFAF2/NDUFB6/ETFDH/MT-ATP8/PC/COQ10B/NUBPL/COX18/COX17/GOT2/HIGD1A/RMND5A/GLO1/ISCU/NDUFAF4/SDHAF3/NDUFA9/COX16/NDUFV2/MPC1/UCP3/NDUFA7/SLC25A27
REACTOME_S_PHASE	REACTOME_S_PHASE	74	0.333051	0.84581	0.753138	1	0.947599	1955	tags=24%, list=24%, signal=19%	UBE2C/CCNA1/CDC25A/GINS2/E2F1/CDC6/CCNE2/CDC25B/MCM2/ANAPC15/CDT1/MCM5/GINS1/POLA2/UBE2S/MCM8/LIN54/POLE
REACTOME_DISEASES_OF_SIGNAL_TRANSDUCTION_BY_GROWTH_FACTOR_RECEPTORS_AND_SECOND_MESSENGERS	REACTOME_DISEASES_OF_SIGNAL_TRANSDUCTION_BY_GROWTH_FACTOR_RECEPTORS_AND_SECOND_MESSENGERS	247	0.315524	0.843797	0.859141	1	0.947599	829	tags=7%, list=10%, signal=7%	VWF/LCK/CAMK2B/FGF18/NEURL1/FGF9/NEURL1B/NRG3/DKK1/DLL1/HDAC10/KAT2B/IL10RA/DLL4/KSR2/NTRK3/ZAP70/IHH
REACTOME_CELLULAR_RESPONSE_TO_HYPOXIA	REACTOME_CELLULAR_RESPONSE_TO_HYPOXIA	36	-0.248709	-0.842554	0.709677	1	0.947599	1343	tags=31%, list=17%, signal=26%	PSMA1/ELOC/PSMC6/PSMB2/PSMA4/HIGD1A/PSMA3/UBE2D1/PSMB8/PSMA2/PSMA6
REACTOME_SYNTHESIS_OF_PIPS_AT_THE_GOLGI_MEMBRANE	REACTOME_SYNTHESIS_OF_PIPS_AT_THE_GOLGI_MEMBRANE	10	-0.329625	-0.842527	0.608163	1	0.947599	198	tags=40%, list=2%, signal=39%	PI4KB/PIK3C3/PIK3R4/PIK3C2G
REACTOME_HS_GAG_BIOSYNTHESIS	REACTOME_HS_GAG_BIOSYNTHESIS	11	-0.316793	-0.84199	0.632479	1	0.947599	850	tags=36%, list=11%, signal=33%	GPC3/HS6ST3/GLCE/GPC4
REACTOME_ADIPOGENESIS	REACTOME_ADIPOGENESIS	48	0.340383	0.841713	0.737687	1	0.947599	460	tags=4%, list=6%, signal=4%	EBF1/PRDM16
REACTOME_PHASE_I_FUNCTIONALIZATION_OF_COMPOUNDS	REACTOME_PHASE_I_FUNCTIONALIZATION_OF_COMPOUNDS	39	0.345803	0.841533	0.708197	1	0.947599	1132	tags=21%, list=14%, signal=18%	AADAC/ADH1A/ADH1B/CYP1B1/FMO1/TBXAS1/ARNT2/CYP26B1
REACTOME_SIGNALING_BY_WNT_IN_CANCER	REACTOME_SIGNALING_BY_WNT_IN_CANCER	19	0.381256	0.841461	0.679904	1	0.947599	1590	tags=16%, list=20%, signal=13%	DKK1/PORCN/RNF43
REACTOME_REGULATION_OF_TP53_ACTIVITY_THROUGH_ACETYLATION	REACTOME_REGULATION_OF_TP53_ACTIVITY_THROUGH_ACETYLATION	19	0.380715	0.840267	0.681107	1	0.947599	4990	tags=100%, list=62%, signal=38%	MAP2K6/PIN1/CHD3/AKT2/AKT1/MBD3/PIP4K2B/BRPF1/CHD4/RBBP7/TP53/GATAD2A/MEAF6/KAT6A/HDAC2/PIP4K2C/ING2/BRD1/GATAD2B
REACTOME_DOWNREGULATION_OF_ERBB2_SIGNALING	REACTOME_DOWNREGULATION_OF_ERBB2_SIGNALING	14	0.398282	0.839886	0.685323	1	0.947599	262	tags=7%, list=3%, signal=7%	NRG3
REACTOME_NUCLEAR_EVENTS_STIMULATED_BY_ALK_SIGNALING_IN_CANCER	REACTOME_NUCLEAR_EVENTS_STIMULATED_BY_ALK_SIGNALING_IN_CANCER	15	0.394079	0.839356	0.688889	1	0.947599	743	tags=13%, list=9%, signal=12%	IL10RA/ZAP70
REACTOME_DNA_REPLICATION_PRE_INITIATION	REACTOME_DNA_REPLICATION_PRE_INITIATION	47	0.340488	0.838697	0.736559	1	0.947599	1955	tags=23%, list=24%, signal=18%	UBE2C/MCM10/CDC6/MCM2/ANAPC15/CDT1/MCM5/POLA2/UBE2S/MCM8/POLE
REACTOME_BMAL1_CLOCK_NPAS2_ACTIVATES_CIRCADIAN_GENE_EXPRESSION	REACTOME_BMAL1_CLOCK_NPAS2_ACTIVATES_CIRCADIAN_GENE_EXPRESSION	11	-0.31537	-0.838209	0.636752	1	0.947599	5513	tags=100%, list=69%, signal=32%	CREBBP/RXRA/KLF15/TBL1X/DBP/NCOA2/TBL1XR1/BHLHE41/BHLHE40/NAMPT
REACTOME_CLATHRIN_MEDIATED_ENDOCYTOSIS	REACTOME_CLATHRIN_MEDIATED_ENDOCYTOSIS	77	0.328859	0.837029	0.764828	1	0.947599	919	tags=9%, list=11%, signal=8%	TACR1/AMPH/SYT11/SNAP91/DNM1/SYT2/LRP2
REACTOME_RUNX2_REGULATES_OSTEOBLAST_DIFFERENTIATION	REACTOME_RUNX2_REGULATES_OSTEOBLAST_DIFFERENTIATION	12	-0.305576	-0.836466	0.646552	1	0.947599	5592	tags=100%, list=70%, signal=31%	HEY2/SRC/MAPK3/ABL1/MAF/CBFB/YES1/RB1/COL1A1/HES1/GLI3
REACTOME_TRANSCRIPTIONAL_REGULATION_BY_VENTX	REACTOME_TRANSCRIPTIONAL_REGULATION_BY_VENTX	17	0.382973	0.836407	0.688185	1	0.947599	178	tags=6%, list=2%, signal=6%	UBE2C
REACTOME_MATURATION_OF_SARS_COV_2_NUCLEOPROTEIN	REACTOME_MATURATION_OF_SARS_COV_2_NUCLEOPROTEIN	11	-0.31425	-0.835232	0.641026	1	0.947599	5522	tags=100%, list=69%, signal=31%	PARP8/GSK3A/UBE2I/PRMT1/PARP4/GSK3B/SRPK1/SUMO1/PARP9/SRPK2
REACTOME_MAPK_TARGETS_NUCLEAR_EVENTS_MEDIATED_BY_MAP_KINASES	REACTOME_MAPK_TARGETS_NUCLEAR_EVENTS_MEDIATED_BY_MAP_KINASES	17	-0.270272	-0.834459	0.679558	1	0.947599	1720	tags=35%, list=21%, signal=28%	PPP2CB/PPP2CA/RPS6KA3/VRK3/RPS6KA5/MEF2C
REACTOME_RAC1_GTPASE_CYCLE	REACTOME_RAC1_GTPASE_CYCLE	91	0.322348	0.833444	0.782922	1	0.947599	2786	tags=41%, list=35%, signal=27%	TIAM1/CIT/DOCK10/ARHGAP25/WAS/ARHGEF25/DOCK3/ARHGAP33/SRGAP2/MCAM/ARHGEF19/MCF2L/RASGRF2/ARAP3/PARD6A/ARHGAP22/PREX1/SRGAP1/ARHGAP45/CDC42EP4/SRGAP3/ARHGDIA/PLEKHG1/BAIAP2/PLEKHG3/NOXA1/ARHGAP4/ARHGAP31/ARAP1/KALRN/ARHGAP39/GIT1/DOCK6/TIAM2/CAV1/DOCK9/TRIO
REACTOME_NUCLEAR_RECEPTOR_TRANSCRIPTION_PATHWAY	REACTOME_NUCLEAR_RECEPTOR_TRANSCRIPTION_PATHWAY	21	0.370567	0.833363	0.700592	1	0.947599	718	tags=14%, list=9%, signal=13%	PGR/NR2F1/NR4A3
REACTOME_POTENTIAL_THERAPEUTICS_FOR_SARS	REACTOME_POTENTIAL_THERAPEUTICS_FOR_SARS	50	0.335284	0.832832	0.746809	1	0.947599	209	tags=4%, list=3%, signal=4%	ITGA4/FXYD6
REACTOME_SIGNALING_BY_EGFR	REACTOME_SIGNALING_BY_EGFR	24	-0.254098	-0.832464	0.693431	1	0.947599	942	tags=21%, list=12%, signal=18%	BTC/SPRY1/SH3GL3/EGF/AREG
REACTOME_RHOB_GTPASE_CYCLE	REACTOME_RHOB_GTPASE_CYCLE	35	0.345087	0.83062	0.712707	1	0.947599	3158	tags=49%, list=39%, signal=30%	CIT/ARHGEF25/MCAM/MCF2L/PREX1/ARHGEF17/ARHGEF2/ARHGEF28/CAVIN1/ARHGAP39/STK10/CAV1/FLOT1/ARHGEF1/ACTC1/MYO9B/ARHGEF11
REACTOME_FORMATION_OF_WDR5_CONTAINING_HISTONE_MODIFYING_COMPLEXES	REACTOME_FORMATION_OF_WDR5_CONTAINING_HISTONE_MODIFYING_COMPLEXES	24	0.361857	0.829754	0.710983	1	0.947599	2554	tags=42%, list=32%, signal=29%	KAT2B/PAGR1/KMT2D/MEN1/KMT2B/HCFC2/SETD1B/KAT2A/HCFC1/KMT2A
REACTOME_SIGNALING_BY_PTK6	REACTOME_SIGNALING_BY_PTK6	32	0.34541	0.828342	0.719376	1	0.947599	1885	tags=22%, list=23%, signal=17%	NRG3/GPNMB/LRRK2/KHDRBS2/DOK1/KHDRBS3/ERBB2
REACTOME_ACTIVATION_OF_BH3_ONLY_PROTEINS	REACTOME_ACTIVATION_OF_BH3_ONLY_PROTEINS	21	0.368274	0.828206	0.707692	1	0.947599	1086	tags=14%, list=13%, signal=12%	BCL2/E2F1/BAD
REACTOME_AURKA_ACTIVATION_BY_TPX2	REACTOME_AURKA_ACTIVATION_BY_TPX2	30	0.34857	0.825067	0.722661	1	0.947599	3073	tags=50%, list=38%, signal=31%	HAUS5/AURKA/CEP131/PCNT/CEP192/HAUS8/CEP164/TUBA4A/CEP290/TUBA1A/SFI1/CEP41/NINL/HAUS1/CEP72
REACTOME_REGULATION_OF_PLK1_ACTIVITY_AT_G2_M_TRANSITION	REACTOME_REGULATION_OF_PLK1_ACTIVITY_AT_G2_M_TRANSITION	38	0.33822	0.823022	0.727372	1	0.947599	2910	tags=42%, list=36%, signal=27%	CCNB2/HAUS5/AURKA/PPP1R12B/CEP131/PCNT/CEP192/HAUS8/CEP164/TUBA4A/CEP290/TUBA1A/SFI1/CEP41/NINL/HAUS1
REACTOME_TRANSCRIPTIONAL_REGULATION_BY_THE_AP_2_TFAP2_FAMILY_OF_TRANSCRIPTION_FACTORS	REACTOME_TRANSCRIPTIONAL_REGULATION_BY_THE_AP_2_TFAP2_FAMILY_OF_TRANSCRIPTION_FACTORS	15	0.386194	0.822561	0.706173	1	0.947599	2769	tags=40%, list=34%, signal=26%	TFAP2E/TFAP2C/ERBB2/KCTD15/NOP2/CREBBP
REACTOME_FORMATION_OF_FIBRIN_CLOT_CLOTTING_CASCADE	REACTOME_FORMATION_OF_FIBRIN_CLOT_CLOTTING_CASCADE	15	0.386044	0.822242	0.708642	1	0.947599	628	tags=13%, list=8%, signal=12%	VWF/CD177
REACTOME_SYNTHESIS_OF_IP3_AND_IP4_IN_THE_CYTOSOL	REACTOME_SYNTHESIS_OF_IP3_AND_IP4_IN_THE_CYTOSOL	13	0.394037	0.819954	0.704082	1	0.947599	2942	tags=62%, list=37%, signal=39%	PLCH2/ITPKA/PLCB3/PLCB1/PLCD4/ITPKC/PLCG1/INPPL1
REACTOME_DIGESTION_AND_ABSORPTION	REACTOME_DIGESTION_AND_ABSORPTION	11	0.407545	0.819222	0.686198	1	0.947599	423	tags=18%, list=5%, signal=17%	CLPS/GUCA2A
REACTOME_APC_C_MEDIATED_DEGRADATION_OF_CELL_CYCLE_PROTEINS	REACTOME_APC_C_MEDIATED_DEGRADATION_OF_CELL_CYCLE_PROTEINS	38	0.336579	0.819028	0.732824	1	0.947599	1260	tags=13%, list=16%, signal=11%	UBE2C/CCNA1/AURKA/PTTG1/ANAPC15
REACTOME_NUCLEOTIDE_BINDING_DOMAIN_LEUCINE_RICH_REPEAT_CONTAINING_RECEPTOR_NLR_SIGNALING_PATHWAYS	REACTOME_NUCLEOTIDE_BINDING_DOMAIN_LEUCINE_RICH_REPEAT_CONTAINING_RECEPTOR_NLR_SIGNALING_PATHWAYS	35	-0.240688	-0.818138	0.731959	1	0.947599	961	tags=17%, list=12%, signal=15%	BIRC3/CASP8/TXNIP/AIM2/CASP4/CASP1
REACTOME_NUCLEOTIDE_SALVAGE	REACTOME_NUCLEOTIDE_SALVAGE	14	0.387904	0.818	0.70398	1	0.947599	1927	tags=36%, list=24%, signal=27%	TK1/TYMP/ADA/UCK2/HPRT1
REACTOME_CYTOSOLIC_SENSORS_OF_PATHOGEN_ASSOCIATED_DNA	REACTOME_CYTOSOLIC_SENSORS_OF_PATHOGEN_ASSOCIATED_DNA	32	-0.24748	-0.817094	0.759615	1	0.947599	537	tags=22%, list=7%, signal=20%	TBK1/CHUK/RIPK1/POLR3G/IFI16/AIM2/NLRC3
REACTOME_VESICLE_MEDIATED_TRANSPORT	REACTOME_VESICLE_MEDIATED_TRANSPORT	351	0.303869	0.816916	0.939061	1	0.947599	1301	tags=12%, list=16%, signal=10%	TACR1/RAB33A/GJA4/KIF20A/GRIA1/AMPH/KIF4A/CNIH2/INS/SCARA5/GJD3/CENPE/RAB39A/KIF19/SYT11/SSC5D/KIF5A/KIFC1/DENND2A/DYNC1I1/SNAP91/ANK1/DNM1/SCARF1/SYT2/KIF26A/SPTBN4/ANK2/LRP2/RAB39B/PLA2G6/COL1A2/RAB36/RAB3A/VPS37D/KIF6/RAB3IL1/SPTB/COL4A1/CHMP6/KIF12
REACTOME_ACTIVATION_OF_BAD_AND_TRANSLOCATION_TO_MITOCHONDRIA	REACTOME_ACTIVATION_OF_BAD_AND_TRANSLOCATION_TO_MITOCHONDRIA	12	0.400854	0.816484	0.7	1	0.947599	1086	tags=17%, list=13%, signal=14%	BCL2/BAD
REACTOME_FORMATION_OF_TC_NER_PRE_INCISION_COMPLEX	REACTOME_FORMATION_OF_TC_NER_PRE_INCISION_COMPLEX	23	-0.25028	-0.814399	0.728571	1	0.947599	6039	tags=87%, list=75%, signal=22%	COPS7A/POLR2E/DDB1/GPS1/POLR2A/ZNF830/XAB2/GTF2H2/CUL4A/COPS6/TCEA1/MNAT1/COPS8/PPIE/UBA52/COPS3/COPS2/GTF2H1/POLR2B/CCNH
REACTOME_FLT3_SIGNALING	REACTOME_FLT3_SIGNALING	19	0.368924	0.814242	0.709988	1	0.947599	142	tags=5%, list=2%, signal=5%	LCK
REACTOME_MTOR_SIGNALLING	REACTOME_MTOR_SIGNALLING	19	-0.258627	-0.813615	0.725146	1	0.947599	5971	tags=42%, list=74%, signal=11%	RPS6KB1/STRADB/CAB39/RPS6/YWHAB/PRKAB1/RRAGC/PRKAA1
REACTOME_RECRUITMENT_OF_MITOTIC_CENTROSOME_PROTEINS_AND_COMPLEXES	REACTOME_RECRUITMENT_OF_MITOTIC_CENTROSOME_PROTEINS_AND_COMPLEXES	37	0.336306	0.813156	0.738462	1	0.947599	3830	tags=68%, list=48%, signal=36%	HAUS5/CEP131/PCNT/MZT2A/CEP192/MZT2B/HAUS8/CEP164/TUBA4A/TUBG2/CDK11B/CEP290/TUBA1A/SFI1/CEP41/NINL/HAUS1/CEP72/DCTN1/CCP110/TUBGCP6/SSNA1/PRKACA/TUBGCP2/AKAP9
REACTOME_REGULATION_OF_MITF_M_DEPENDENT_GENES_INVOLVED_IN_LYSOSOME_BIOGENESIS_AND_AUTOPHAGY	REACTOME_REGULATION_OF_MITF_M_DEPENDENT_GENES_INVOLVED_IN_LYSOSOME_BIOGENESIS_AND_AUTOPHAGY	10	-0.317272	-0.810954	0.669388	1	0.947599	3321	tags=90%, list=41%, signal=53%	MITF/ATP6V0D1/ATP6V1H/ATP6V1C1/ATP6V1E1/ATP6V1D/ASAH1/ATP6V0E1/ATP6AP2
REACTOME_MEMBRANE_TRAFFICKING	REACTOME_MEMBRANE_TRAFFICKING	333	0.302052	0.810034	0.944056	1	0.947599	1301	tags=11%, list=16%, signal=9%	TACR1/RAB33A/GJA4/KIF20A/GRIA1/AMPH/KIF4A/CNIH2/INS/GJD3/CENPE/RAB39A/KIF19/SYT11/KIF5A/KIFC1/DENND2A/DYNC1I1/SNAP91/ANK1/DNM1/SYT2/KIF26A/SPTBN4/ANK2/LRP2/RAB39B/PLA2G6/RAB36/RAB3A/VPS37D/KIF6/RAB3IL1/SPTB/CHMP6/KIF12
REACTOME_CYTOPROTECTION_BY_HMOX1	REACTOME_CYTOPROTECTION_BY_HMOX1	20	-0.257204	-0.810004	0.746914	1	0.947599	2955	tags=55%, list=37%, signal=35%	STAT3/NCOA2/TBL1XR1/COX4I1/COX6C/NDUFA4/BLVRB/CYCS/BACH1/TXNIP/ALB
REACTOME_SIGNALING_BY_RHO_GTPASES_MIRO_GTPASES_AND_RHOBTB3	REACTOME_SIGNALING_BY_RHO_GTPASES_MIRO_GTPASES_AND_RHOBTB3	342	0.301778	0.809925	0.948052	1	0.947599	2521	tags=30%, list=31%, signal=21%	SPC24/RHOJ/LCK/PLEKHG4B/BIRC5/CENPE/TIAM1/CIT/DLG4/KIF5A/SH3PXD2A/CENPM/ZNF512B/DYNC1I1/DOCK10/CDC25C/ZWINT/ARHGAP25/WAS/ZAP70/ARHGEF25/BAIAP2L2/SGO2/DOCK3/ARHGAP33/ARHGAP8/PPP1R12B/RHPN1/SRGAP2/MCAM/CDC42EP5/ARHGEF40/CENPO/ARHGEF19/MCF2L/RASGRF2/OBSCN/SGO1/PIN1/KLC1/CENPL/ARAP3/FGD1/PARD6A/ARHGAP22/PREX1/MAPK11/ARHGEF17/MYH10/PRKCA/PPP1R14A/SRGAP1/DVL1/PLXNA1/RND2/MTR/MYO19/DLG5/ARL13B/ARHGAP45/…
REACTOME_CA2_PATHWAY	REACTOME_CA2_PATHWAY	31	0.339256	0.808694	0.734078	1	0.947599	2161	tags=39%, list=27%, signal=28%	AXIN2/GNAO1/GNG11/GNG4/ITPR1/WNT11/GNG2/PRKCA/TCF7/PLCB3/PLCB1/TCF7L1
REACTOME_APOPTOTIC_FACTOR_MEDIATED_RESPONSE	REACTOME_APOPTOTIC_FACTOR_MEDIATED_RESPONSE	10	-0.316327	-0.808537	0.673469	1	0.947599	5505	tags=100%, list=68%, signal=32%	AVEN/GSDME/MAPK3/APAF1/APIP/CASP9/C1QBP/CYCS/CASP3
REACTOME_ANCHORING_FIBRIL_FORMATION	REACTOME_ANCHORING_FIBRIL_FORMATION	11	0.401879	0.807831	0.700521	1	0.947599	1651	tags=45%, list=21%, signal=36%	COL4A6/COL1A2/COL4A1/COL4A2/COL4A5
REACTOME_KERATAN_SULFATE_KERATIN_METABOLISM	REACTOME_KERATAN_SULFATE_KERATIN_METABOLISM	17	0.369678	0.807371	0.7162	1	0.947599	1246	tags=29%, list=15%, signal=25%	ACAN/B3GNT7/CHST6/ST3GAL4/B3GNT4
REACTOME_M_PHASE	REACTOME_M_PHASE	170	0.305128	0.806416	0.880522	1	0.947599	1712	tags=15%, list=21%, signal=12%	SPC24/UBE2C/KIF20A/BIRC5/CENPE/CENPM/ESPL1/DYNC1I1/CCNB2/ZWINT/HAUS5/PTTG1/SGO2/NUP210/CENPO/ANAPC15/CHMP6/SGO1/CENPL/CEP131/PCNT/MZT2A/NCAPG2/PRKCA/CEP192/UBE2S
REACTOME_SLC_MEDIATED_TRANSMEMBRANE_TRANSPORT	REACTOME_SLC_MEDIATED_TRANSMEMBRANE_TRANSPORT	107	0.307683	0.805407	0.839556	1	0.947599	1418	tags=19%, list=18%, signal=16%	SLC5A8/SLC17A8/LCN12/SLC6A19/SLC18A1/SLC8A3/SLC5A12/SLC30A8/SLC5A9/SLC24A4/ARL2BP/SLC27A1/SLC16A8/SLCO2A1/SLC16A10/SLC9A3/SLC2A1/SLC24A3/SLC13A3/SLC44A2
REACTOME_THROMBIN_SIGNALLING_THROUGH_PROTEINASE_ACTIVATED_RECEPTORS_PARS	REACTOME_THROMBIN_SIGNALLING_THROUGH_PROTEINASE_ACTIVATED_RECEPTORS_PARS	11	0.400522	0.805103	0.705729	1	0.947599	1510	tags=27%, list=19%, signal=22%	GNG11/GNG4/GNG2
REACTOME_PROGRAMMED_CELL_DEATH	REACTOME_PROGRAMMED_CELL_DEATH	103	-0.192755	-0.803846	1	1	0.947599	1555	tags=25%, list=19%, signal=21%	YWHAB/PSMD12/RIPK1/DAPK2/TP73/PRKN/PSMA1/PSMC6/SFN/YWHAQ/PSMB2/PSMA4/CHMP2B/OCLN/BIRC3/CASP3/PSMA3/CASP8/IL1A/PSMB8/TNFSF10/PSMA2/PSMA6/CASP4/CASP5/CASP1
REACTOME_SARS_COV_2_TARGETS_HOST_INTRACELLULAR_SIGNALLING_AND_REGULATORY_PATHWAYS	REACTOME_SARS_COV_2_TARGETS_HOST_INTRACELLULAR_SIGNALLING_AND_REGULATORY_PATHWAYS	11	-0.302178	-0.803146	0.67094	1	0.947599	5619	tags=64%, list=70%, signal=19%	PDPK1/YWHAE/YWHAZ/YWHAG/YWHAB/SFN/YWHAQ
REACTOME_CELLULAR_RESPONSE_TO_STARVATION	REACTOME_CELLULAR_RESPONSE_TO_STARVATION	75	-0.204415	-0.803	0.840909	1	0.947599	3135	tags=55%, list=39%, signal=34%	RPL21/RPL9/RPS3A/ATP6V0D1/ATP6V1H/ATF4/EIF2S1/RPL14/ATP6V1C1/RPL4/RPL32/ATP6V1E1/RPS13/RPL19/RPL28/RPL7/ATP6V1E2/UBA52/RPS7/RPL37/RPL5/RPS15A/RPL15/MIOS/ATP6V1D/FNIP1/CEBPG/RPS14/RPL24/RPL23/RPS6/RPL39L/SH3BP4/EIF2S2/ATP6V0E1/RPS27L/RPL26L1/BMT2/RRAGC/SESN1/ATP6V1C2
REACTOME_TRAF6_MEDIATED_NF_KB_ACTIVATION	REACTOME_TRAF6_MEDIATED_NF_KB_ACTIVATION	11	-0.302054	-0.802815	0.67094	1	0.947599	5620	tags=100%, list=70%, signal=30%	NFKB1/MAVS/NFKB2/IKBKB/RELA/NFKBIA/NKIRAS2/CHUK/AGER/IFIH1
REACTOME_GLYCOGEN_METABOLISM	REACTOME_GLYCOGEN_METABOLISM	14	-0.284066	-0.802801	0.722222	1	0.947599	802	tags=21%, list=10%, signal=19%	PHKA1/GBE1/NHLRC1
REACTOME_POST_TRANSLATIONAL_MODIFICATION_SYNTHESIS_OF_GPI_ANCHORED_PROTEINS	REACTOME_POST_TRANSLATIONAL_MODIFICATION_SYNTHESIS_OF_GPI_ANCHORED_PROTEINS	29	0.342249	0.802786	0.742045	1	0.947599	1411	tags=24%, list=18%, signal=20%	LY6H/NEGR1/LYPD6B/RTN4RL1/NTNG2/SPRN/NTNG1
REACTOME_NUCLEOTIDE_CATABOLISM	REACTOME_NUCLEOTIDE_CATABOLISM	21	0.356852	0.802518	0.733728	1	0.947599	1785	tags=33%, list=22%, signal=26%	UPB1/DPYD/TYMP/NT5C/ENTPD1/NT5E/ENTPD3
REACTOME_HOMOLOGOUS_DNA_PAIRING_AND_STRAND_EXCHANGE	REACTOME_HOMOLOGOUS_DNA_PAIRING_AND_STRAND_EXCHANGE	10	0.40344	0.798751	0.7107	1	0.947599	961	tags=20%, list=12%, signal=18%	RMI2/XRCC3
REACTOME_TNFR1_INDUCED_NF_KAPPA_B_SIGNALING_PATHWAY	REACTOME_TNFR1_INDUCED_NF_KAPPA_B_SIGNALING_PATHWAY	17	-0.257352	-0.794571	0.751381	1	0.947599	2634	tags=53%, list=33%, signal=36%	TAB2/USP2/UBA52/RACK1/OPTN/CHUK/RIPK1/OTUD1/BIRC3
REACTOME_EPH_EPHRIN_SIGNALING	REACTOME_EPH_EPHRIN_SIGNALING	58	0.31644	0.793307	0.821429	1	0.947599	926	tags=9%, list=12%, signal=8%	MMP2/TIAM1/EPHA7/DNM1/EPHA5
REACTOME_DNA_REPAIR	REACTOME_DNA_REPAIR	134	0.301941	0.792985	0.870707	1	0.947599	2121	tags=20%, list=26%, signal=15%	NEIL3/RTEL1/CCNA1/UBA7/FANCD2/NEIL1/FANCI/FANCA/RMI2/FANCG/XRCC3/FANCE/EME1/NTHL1/XRCC1/ERCC1/NSD2/MDC1/SPIDR/LIG4/INO80E/TIPIN/PNKP/POLE/POLR2I/POLD1/KAT5
REACTOME_NUCLEAR_EVENTS_KINASE_AND_TRANSCRIPTION_FACTOR_ACTIVATION	REACTOME_NUCLEAR_EVENTS_KINASE_AND_TRANSCRIPTION_FACTOR_ACTIVATION	32	-0.239705	-0.791425	0.798077	1	0.947599	797	tags=22%, list=10%, signal=20%	VRK3/EGR1/RPS6KA5/FOSL1/SH3GL3/FOSB/MEF2C
REACTOME_ASPARAGINE_N_LINKED_GLYCOSYLATION	REACTOME_ASPARAGINE_N_LINKED_GLYCOSYLATION	160	0.29907	0.790101	0.891457	1	0.947599	877	tags=8%, list=11%, signal=7%	ST8SIA1/MGAT4C/CHST8/GRIA1/ST8SIA5/CNIH2/INS/DYNC1I1/ANK1/FUT3/SPTBN4/ANK2
REACTOME_RAB_REGULATION_OF_TRAFFICKING	REACTOME_RAB_REGULATION_OF_TRAFFICKING	58	0.31478	0.789145	0.823529	1	0.947599	1234	tags=10%, list=15%, signal=9%	RAB33A/RAB39A/DENND2A/RAB39B/RAB3A/RAB3IL1
REACTOME_BETA_CATENIN_PHOSPHORYLATION_CASCADE	REACTOME_BETA_CATENIN_PHOSPHORYLATION_CASCADE	10	-0.30774	-0.78659	0.697959	1	0.947599	5574	tags=70%, list=69%, signal=22%	PPP2R5E/PPP2R5C/GSK3B/PPP2R1B/PPP2R5A/PPP2CB/PPP2CA
REACTOME_INTRACELLULAR_SIGNALING_BY_SECOND_MESSENGERS	REACTOME_INTRACELLULAR_SIGNALING_BY_SECOND_MESSENGERS	160	0.297355	0.785569	0.896482	1	0.947599	1643	tags=16%, list=20%, signal=13%	LCK/PDE1B/CAMK2B/FGF18/FGF9/INS/NRG3/PRKCG/NTRK3/ADCY2/ADCY1/USP13/NBEA/BAD/ADCY3/ITPR1/NTRK2/ADCY7/FGF19/ADCY8/FOXO6/PHC1/PHLPP2/FYN/PRKCA
REACTOME_RHOBTB2_GTPASE_CYCLE	REACTOME_RHOBTB2_GTPASE_CYCLE	12	-0.286906	-0.785358	0.715517	1	0.947599	5742	tags=100%, list=71%, signal=29%	MSI2/DBN1/ACTN1/CCT6A/HSP90AB1/TXNL1/CUL3/HNRNPC/SRRM1/TMOD3/TWF1
REACTOME_MITOCHONDRIAL_BIOGENESIS	REACTOME_MITOCHONDRIAL_BIOGENESIS	41	-0.224274	-0.785216	0.775281	1	0.947599	1833	tags=24%, list=23%, signal=19%	CYCS/TMEM11/MT-ATP8/GLUD1/GABPA/PRKAB1/ACSS2/MEF2C/GLUD2/PERM1
REACTOME_PARASITE_INFECTION	REACTOME_PARASITE_INFECTION	33	-0.236969	-0.784293	0.792079	1	0.947599	2498	tags=45%, list=31%, signal=31%	ARPC3/ACTR2/ARPC2/CRK/ARPC1A/ARPC5/ABI1/ACTR3/WASL/WIPF3/RAC1/VAV3/ELMO1/NCK1/CD3G
REACTOME_BUTYRATE_RESPONSE_FACTOR_1_BRF1_BINDS_AND_DESTABILIZES_MRNA	REACTOME_BUTYRATE_RESPONSE_FACTOR_1_BRF1_BINDS_AND_DESTABILIZES_MRNA	10	-0.306446	-0.783282	0.697959	1	0.947599	2708	tags=80%, list=34%, signal=53%	EXOSC6/DCP1A/EXOSC3/ZFP36L1/EXOSC1/XRN1/YWHAB/EXOSC7
REACTOME_DISEASES_ASSOCIATED_WITH_GLYCOSAMINOGLYCAN_METABOLISM	REACTOME_DISEASES_ASSOCIATED_WITH_GLYCOSAMINOGLYCAN_METABOLISM	15	0.367509	0.782765	0.741975	1	0.947599	1310	tags=27%, list=16%, signal=22%	NCAN/ACAN/CHST6/SDC3
REACTOME_TRANSCRIPTION_OF_THE_HIV_GENOME	REACTOME_TRANSCRIPTION_OF_THE_HIV_GENOME	31	-0.238054	-0.782541	0.831776	1	0.947599	6139	tags=52%, list=76%, signal=12%	TAF9B/CCNK/GTF2A2/TAF11/TBP/TAF9/GTF2H1/CCNT1/POLR2B/GTF2E1/GTF2E2/TAF7/GTF2A1/ELOC/TAF5/CCNH
REACTOME_METABOLISM_OF_NUCLEOTIDES	REACTOME_METABOLISM_OF_NUCLEOTIDES	55	0.311784	0.780889	0.812038	1	0.947599	1927	tags=29%, list=24%, signal=22%	AK5/UPB1/DPYD/TK1/TYMP/ADA/NT5C/TYMS/PFAS/ENTPD1/NT5E/NME3/UCK2/ENTPD3/AK1/HPRT1
REACTOME_PROTEIN_HYDROXYLATION	REACTOME_PROTEIN_HYDROXYLATION	16	-0.259278	-0.779507	0.755319	1	0.947599	5965	tags=94%, list=74%, signal=24%	JMJD6/KDM8/U2AF2/DRG2/JMJD4/RPL27A/RPL8/RIOX1/DRG1/ASPH/RIOX2/ETF1/RWDD1/RPS6/ZC3H15
REACTOME_RUNX1_REGULATES_TRANSCRIPTION_OF_GENES_INVOLVED_IN_DIFFERENTIATION_OF_HSCS	REACTOME_RUNX1_REGULATES_TRANSCRIPTION_OF_GENES_INVOLVED_IN_DIFFERENTIATION_OF_HSCS	35	0.323218	0.777981	0.781215	1	0.947599	91	tags=3%, list=1%, signal=3%	MYB
REACTOME_NOTCH1_INTRACELLULAR_DOMAIN_REGULATES_TRANSCRIPTION	REACTOME_NOTCH1_INTRACELLULAR_DOMAIN_REGULATES_TRANSCRIPTION	30	0.328344	0.777191	0.767756	1	0.947599	1186	tags=13%, list=15%, signal=11%	HDAC10/KAT2B/NBEA/HDAC11
REACTOME_MYD88_INDEPENDENT_TLR4_CASCADE	REACTOME_MYD88_INDEPENDENT_TLR4_CASCADE	65	-0.199987	-0.775329	0.888889	1	0.947599	1720	tags=29%, list=21%, signal=23%	PPP2CB/TBK1/CHUK/PPP2CA/AGER/MAP2K3/RIPK1/RPS6KA3/SKP1/BIRC3/VRK3/CASP8/MAP3K8/UBE2D1/IKBIP/TANK/RPS6KA5/TIFA/MEF2C
REACTOME_CARGO_RECOGNITION_FOR_CLATHRIN_MEDIATED_ENDOCYTOSIS	REACTOME_CARGO_RECOGNITION_FOR_CLATHRIN_MEDIATED_ENDOCYTOSIS	57	0.30998	0.774695	0.833157	1	0.947599	919	tags=9%, list=11%, signal=8%	TACR1/SYT11/SNAP91/SYT2/LRP2
REACTOME_INFLAMMASOMES	REACTOME_INFLAMMASOMES	13	0.372148	0.774406	0.743622	1	0.947599	457	tags=15%, list=6%, signal=15%	NLRP1/BCL2
REACTOME_RHOC_GTPASE_CYCLE	REACTOME_RHOC_GTPASE_CYCLE	39	0.318196	0.774349	0.791257	1	0.947599	3158	tags=44%, list=39%, signal=27%	CIT/ARHGEF25/MCAM/ARHGEF40/MCF2L/PREX1/ARHGEF17/ARHGDIA/ARHGEF28/CAVIN1/ARHGAP39/STK10/CAV1/FLOT1/ARHGEF1/MYO9B/ARHGEF11
REACTOME_IRON_UPTAKE_AND_TRANSPORT	REACTOME_IRON_UPTAKE_AND_TRANSPORT	28	0.330744	0.773545	0.775626	1	0.947599	1270	tags=14%, list=16%, signal=12%	CYBRD1/ATP6V1G2/TFR2/ATP6V0E2
REACTOME_ER_TO_GOLGI_ANTEROGRADE_TRANSPORT	REACTOME_ER_TO_GOLGI_ANTEROGRADE_TRANSPORT	79	0.303171	0.773291	0.854922	1	0.947599	877	tags=9%, list=11%, signal=8%	GRIA1/CNIH2/INS/DYNC1I1/ANK1/SPTBN4/ANK2
REACTOME_REGULATION_OF_ENDOGENOUS_RETROELEMENTS_BY_PIWI_INTERACTING_RNAS_PIRNAS	REACTOME_REGULATION_OF_ENDOGENOUS_RETROELEMENTS_BY_PIWI_INTERACTING_RNAS_PIRNAS	21	0.343447	0.772373	0.772781	1	0.947599	3649	tags=62%, list=45%, signal=34%	DPF1/MTA1/SS18L1/CHD3/DNMT3A/ARID1B/SMARCD1/SMARCC2/MBD3/SMARCA4/CHD4/RBBP7/DPF2
REACTOME_HIV_TRANSCRIPTION_ELONGATION	REACTOME_HIV_TRANSCRIPTION_ELONGATION	17	-0.250093	-0.772159	0.773481	1	0.947599	6039	tags=100%, list=75%, signal=25%	NELFA/POLR2J/NELFB/ELL/POLR2E/CTDP1/NELFE/POLR2A/GTF2H2/TCEA1/MNAT1/GTF2H1/CCNT1/POLR2B/ELOC/CCNH
REACTOME_INTRAFLAGELLAR_TRANSPORT	REACTOME_INTRAFLAGELLAR_TRANSPORT	20	0.345936	0.772135	0.763095	1	0.947599	2766	tags=55%, list=34%, signal=36%	KIF17/WDR35/IFT81/WDR19/IFT172/TUBB2B/TUBA4A/TUBA1A/IFT140/KIF3A/KIF3C
REACTOME_RECYCLING_PATHWAY_OF_L1	REACTOME_RECYCLING_PATHWAY_OF_L1	23	0.337504	0.770852	0.773782	1	0.947599	2604	tags=39%, list=32%, signal=27%	KIF4A/DNM1/L1CAM/RPS6KA4/MSN/TUBB2B/TUBA4A/RPS6KA2/TUBA1A
REACTOME_SYNTHESIS_OF_BILE_ACIDS_AND_BILE_SALTS_VIA_7ALPHA_HYDROXYCHOLESTEROL	REACTOME_SYNTHESIS_OF_BILE_ACIDS_AND_BILE_SALTS_VIA_7ALPHA_HYDROXYCHOLESTEROL	14	-0.272208	-0.769288	0.777778	1	0.947599	1766	tags=50%, list=22%, signal=39%	AKR1C3/AKR1C1/SCP2/CYP7B1/AKR1C2/SLC27A2/ACOX2
REACTOME_INTERLEUKIN_2_FAMILY_SIGNALING	REACTOME_INTERLEUKIN_2_FAMILY_SIGNALING	20	0.344034	0.76789	0.767857	1	0.947599	142	tags=5%, list=2%, signal=5%	LCK
REACTOME_ACYL_CHAIN_REMODELLING_OF_PC	REACTOME_ACYL_CHAIN_REMODELLING_OF_PC	12	0.375476	0.764794	0.745455	1	0.947599	2436	tags=50%, list=30%, signal=35%	PLA2G3/PLA2G6/LPCAT3/PLB1/LPCAT4/PLA2G4C
REACTOME_NFE2L2_REGULATING_ANTI_OXIDANT_DETOXIFICATION_ENZYMES	REACTOME_NFE2L2_REGULATING_ANTI_OXIDANT_DETOXIFICATION_ENZYMES	14	-0.269189	-0.760755	0.787879	1	0.947599	3222	tags=79%, list=40%, signal=47%	TXNRD1/NFE2L2/NQO1/ATF4/GSR/SLC7A11/TXN/BACH1/PRDX1/GSTA1/SOD3
REACTOME_VEGFR2_MEDIATED_VASCULAR_PERMEABILITY	REACTOME_VEGFR2_MEDIATED_VASCULAR_PERMEABILITY	15	-0.258498	-0.760722	0.776042	1	0.947599	5971	tags=100%, list=74%, signal=26%	AKT2/AKT1/CAV1/PRR5/MLST8/CALM1/CTNND1/PDPK1/RICTOR/MAPKAP1/PAK2/CTNNA1/RAC1/VAV3
REACTOME_BINDING_AND_UPTAKE_OF_LIGANDS_BY_SCAVENGER_RECEPTORS	REACTOME_BINDING_AND_UPTAKE_OF_LIGANDS_BY_SCAVENGER_RECEPTORS	20	0.340738	0.760533	0.775	1	0.947599	1385	tags=30%, list=17%, signal=25%	SCARA5/SSC5D/SCARF1/COL1A2/COL4A1/COL4A2
REACTOME_RIPK1_MEDIATED_REGULATED_NECROSIS	REACTOME_RIPK1_MEDIATED_REGULATED_NECROSIS	19	-0.241508	-0.759759	0.812865	1	0.947599	2711	tags=58%, list=34%, signal=38%	ITCH/UBA52/UBE2L3/PDCD6IP/PELI1/SDCBP/RIPK1/PRKN/BIRC3/CASP8/TNFSF10
REACTOME_HSF1_ACTIVATION	REACTOME_HSF1_ACTIVATION	17	0.347714	0.759402	0.769793	1	0.947599	1645	tags=18%, list=20%, signal=14%	HSPA6/COL4A6/HSPA1A
REACTOME_APOPTOTIC_CLEAVAGE_OF_CELLULAR_PROTEINS	REACTOME_APOPTOTIC_CLEAVAGE_OF_CELLULAR_PROTEINS	13	-0.273381	-0.758606	0.784404	1	0.947599	1043	tags=77%, list=13%, signal=67%	ADD1/PTK2/SATB1/FNTA/PRKCD/STK24/DSG2/OCLN/CASP3/CASP8
REACTOME_PROCESSING_OF_DNA_DOUBLE_STRAND_BREAK_ENDS	REACTOME_PROCESSING_OF_DNA_DOUBLE_STRAND_BREAK_ENDS	25	0.328928	0.75754	0.798387	1	0.947599	2313	tags=28%, list=29%, signal=20%	CCNA1/RMI2/NSD2/MDC1/TIPIN/KAT5/HERC2
REACTOME_ARACHIDONIC_ACID_METABOLISM	REACTOME_ARACHIDONIC_ACID_METABOLISM	16	0.350321	0.756224	0.764128	1	0.947599	1022	tags=25%, list=13%, signal=22%	CYP1B1/LTC4S/ALOX15B/TBXAS1
REACTOME_REGULATION_OF_TP53_ACTIVITY_THROUGH_PHOSPHORYLATION	REACTOME_REGULATION_OF_TP53_ACTIVITY_THROUGH_PHOSPHORYLATION	37	0.31263	0.755909	0.798901	1	0.947599	2310	tags=30%, list=29%, signal=21%	CCNA1/RMI2/AURKA/PIN1/MAPK11/TAF6/NUAK1/HIPK2/KAT5/TAF10/CSNK2B
REACTOME_UBIQUINOL_BIOSYNTHESIS	REACTOME_UBIQUINOL_BIOSYNTHESIS	10	-0.295333	-0.754876	0.734694	1	0.947599	878	tags=30%, list=11%, signal=27%	PDSS2/COQ2/COQ6
REACTOME_SCAVENGING_BY_CLASS_A_RECEPTORS	REACTOME_SCAVENGING_BY_CLASS_A_RECEPTORS	13	0.361464	0.752173	0.756378	1	0.947599	1385	tags=31%, list=17%, signal=26%	SCARA5/COL1A2/COL4A1/COL4A2
REACTOME_SUMOYLATION	REACTOME_SUMOYLATION	84	0.293876	0.751973	0.872407	1	0.947599	2973	tags=31%, list=37%, signal=20%	PGR/BIRC5/IKBKE/AURKA/NUP210/PHC1/DNMT3B/TFAP2C/MDC1/MTA1/HIPK2/CHD3/CBX2/HERC2/NCOR2/RING1/DNMT3A/ZBED1/TRIM28/CREBBP/NR1H3/NR3C1/HDAC7/NUP85/DDX17/THRA
REACTOME_ANTIGEN_ACTIVATES_B_CELL_RECEPTOR_BCR_LEADING_TO_GENERATION_OF_SECOND_MESSENGERS	REACTOME_ANTIGEN_ACTIVATES_B_CELL_RECEPTOR_BCR_LEADING_TO_GENERATION_OF_SECOND_MESSENGERS	13	-0.270844	-0.751564	0.784404	1	0.947599	790	tags=15%, list=10%, signal=14%	NCK1/BLNK
REACTOME_RHO_GTPASE_CYCLE	REACTOME_RHO_GTPASE_CYCLE	232	0.280643	0.749476	0.952048	1	0.947599	2928	tags=36%, list=36%, signal=24%	RHOJ/LCK/PLEKHG4B/TIAM1/CIT/SH3PXD2A/ZNF512B/DOCK10/ARHGAP25/WAS/ZAP70/ARHGEF25/BAIAP2L2/DOCK3/ARHGAP33/ARHGAP8/RHPN1/SRGAP2/MCAM/CDC42EP5/ARHGEF40/ARHGEF19/MCF2L/RASGRF2/OBSCN/ARAP3/FGD1/PARD6A/ARHGAP22/PREX1/ARHGEF17/SRGAP1/PLXNA1/RND2/MTR/DLG5/ARL13B/ARHGAP45/PLXND1/FNBP1/CDC42EP4/ITSN1/SEMA4F/SRGAP3/ARHGDIA/FGD4/PLEKHG5/WDR6/PLEKHG1/ARHGEF9/ARHGAP19/ARHGEF2/GFOD1/BAIAP2/PLEKHG3/RHOBTB2/SCRIB/…
REACTOME_RND3_GTPASE_CYCLE	REACTOME_RND3_GTPASE_CYCLE	23	-0.230213	-0.749101	0.778571	1	0.947599	6200	tags=100%, list=77%, signal=23%	SEMA4F/PLEKHG5/WDR6/SCRIB/ANKRD26/CAV1/VANGL2/CKB/FLOT2/RND3/ARHGAP35/VANGL1/NISCH/FAM83B/TXNL1/KTN1/PICALM/CPD/LEMD3/TMOD3/PTPN13/MUC13
REACTOME_HATS_ACETYLATE_HISTONES	REACTOME_HATS_ACETYLATE_HISTONES	41	-0.213899	-0.748892	0.786517	1	0.947599	867	tags=12%, list=11%, signal=11%	MBIP/TADA1/HAT1/ATXN7/PAX3
REACTOME_TERMINATION_OF_TRANSLESION_DNA_SYNTHESIS	REACTOME_TERMINATION_OF_TRANSLESION_DNA_SYNTHESIS	12	0.367667	0.748886	0.75974	1	0.947599	513	tags=8%, list=6%, signal=8%	UBA7
REACTOME_REGULATION_OF_PYRUVATE_METABOLISM	REACTOME_REGULATION_OF_PYRUVATE_METABOLISM	14	0.354733	0.74805	0.768657	1	0.947599	2872	tags=43%, list=36%, signal=28%	PDK4/PDK3/RMND5B/NEK1/PGAM5/PDHA1
REACTOME_MITOCHONDRIAL_PROTEIN_IMPORT	REACTOME_MITOCHONDRIAL_PROTEIN_IMPORT	33	-0.226008	-0.748014	0.831683	1	0.947599	6236	tags=100%, list=78%, signal=23%	TIMM13/TIMM50/GFER/ATP5MC1/MTX1/CYC1/TIMM8A/COA4/TIMM17B/SLC25A6/TIMM44/HSCB/SLC25A4/CHCHD3/TOMM40/CHCHD5/SAMM50/HSPA9/HSPD1/TOMM20/ATP5F1A/FXN/TOMM22/VDAC1/IDH3G/TOMM70/PMPCA/TIMM17A/CHCHD2/GRPEL2/COX17/COQ2
REACTOME_DOWNREGULATION_OF_TGF_BETA_RECEPTOR_SIGNALING	REACTOME_DOWNREGULATION_OF_TGF_BETA_RECEPTOR_SIGNALING	14	-0.264069	-0.746285	0.813131	1	0.947599	5926	tags=50%, list=74%, signal=13%	UBA52/PPP1CC/TGFB1/PPP1CB/SMAD2/SMURF2/PMEPA1
REACTOME_EPHA_MEDIATED_GROWTH_CONE_COLLAPSE	REACTOME_EPHA_MEDIATED_GROWTH_CONE_COLLAPSE	17	0.341528	0.745893	0.783191	1	0.947599	1629	tags=29%, list=20%, signal=24%	EPHA7/EPHA5/EPHA8/FYN/MYH10
REACTOME_NEDDYLATION	REACTOME_NEDDYLATION	125	0.283968	0.744671	0.904954	1	0.947599	759	tags=5%, list=9%, signal=4%	NEURL2/HIF3A/BIRC5/KLHL3/ASB2/SPSB4
REACTOME_MITOTIC_G1_PHASE_AND_G1_S_TRANSITION	REACTOME_MITOTIC_G1_PHASE_AND_G1_S_TRANSITION	73	0.293413	0.744172	0.869748	1	0.947599	1955	tags=21%, list=24%, signal=16%	MCM10/CCNA1/CDC25A/E2F1/CDC6/TK1/CCNE2/MCM2/CDT1/MCM5/TYMS/POLA2/MCM8/LIN54/POLE
REACTOME_TRNA_MODIFICATION_IN_THE_NUCLEUS_AND_CYTOSOL	REACTOME_TRNA_MODIFICATION_IN_THE_NUCLEUS_AND_CYTOSOL	23	0.325709	0.743911	0.802784	1	0.947599	2624	tags=43%, list=33%, signal=29%	ADAT3/CDKAL1/TRMT9B/WDR4/OSGEP/TRMT112/CTU1/FTSJ1/QTRT1/PUS1
REACTOME_TRANSPORT_OF_VITAMINS_NUCLEOSIDES_AND_RELATED_MOLECULES	REACTOME_TRANSPORT_OF_VITAMINS_NUCLEOSIDES_AND_RELATED_MOLECULES	20	0.33268	0.742547	0.792857	1	0.947599	1757	tags=30%, list=22%, signal=24%	LCN12/ARL2BP/SLC27A1/SLCO2A1/SLC29A4/SLC16A2
REACTOME_OXIDATIVE_STRESS_INDUCED_SENESCENCE	REACTOME_OXIDATIVE_STRESS_INDUCED_SENESCENCE	30	0.313399	0.741816	0.802706	1	0.947599	3551	tags=60%, list=44%, signal=34%	E2F1/MAP2K6/PHC1/MAPK10/MAPK11/CBX2/CBX6/AGO4/RING1/KDM6B/TNRC6C/MAP2K7/CDK4/MAPK3/MAPKAPK3/TFDP1/RBBP7/TNRC6A
REACTOME_RHO_GTPASES_ACTIVATE_PKNS	REACTOME_RHO_GTPASES_ACTIVATE_PKNS	20	-0.235379	-0.741273	0.833333	1	0.947599	1649	tags=35%, list=20%, signal=28%	RAC1/YWHAB/SFN/YWHAQ/MYL12B/KDM4C/MYH11
REACTOME_CIRCADIAN_CLOCK	REACTOME_CIRCADIAN_CLOCK	30	-0.224752	-0.741263	0.878261	1	0.947599	2942	tags=57%, list=37%, signal=36%	NCOA2/TBL1XR1/HIF1A/UBA52/USP46/PPP1CC/PPP1CB/PER2/CRY1/CREM/RORA/SIRT1/BHLHE41/SKP1/BHLHE40/NAMPT/MEF2C
REACTOME_RESPONSE_OF_MTB_TO_PHAGOCYTOSIS	REACTOME_RESPONSE_OF_MTB_TO_PHAGOCYTOSIS	12	0.360997	0.735301	0.776623	1	0.947599	3438	tags=50%, list=43%, signal=29%	CORO1A/NOS2/VPS33B/MAPK3/GSK3A/DUSP16
REACTOME_INFECTION_WITH_MYCOBACTERIUM_TUBERCULOSIS	REACTOME_INFECTION_WITH_MYCOBACTERIUM_TUBERCULOSIS	15	0.345155	0.735152	0.785185	1	0.947599	702	tags=13%, list=9%, signal=12%	MRC1/CORO1A
REACTOME_INOSITOL_PHOSPHATE_METABOLISM	REACTOME_INOSITOL_PHOSPHATE_METABOLISM	26	0.31756	0.734466	0.829493	1	0.947599	3024	tags=50%, list=38%, signal=31%	INPP4B/PLCH2/ISYNA1/MTMR7/ITPKA/PPIP5K1/PLCB3/PLCB1/PLCD4/ITPKC/PLCG1/INPPL1/IPPK
REACTOME_TRANSLATION_OF_SARS_COV_2_STRUCTURAL_PROTEINS	REACTOME_TRANSLATION_OF_SARS_COV_2_STRUCTURAL_PROTEINS	31	0.306669	0.731016	0.810056	1	0.947599	1173	tags=10%, list=15%, signal=8%	MGAT4C/ZDHHC11/ST3GAL4
REACTOME_DNA_DOUBLE_STRAND_BREAK_REPAIR	REACTOME_DNA_DOUBLE_STRAND_BREAK_REPAIR	59	0.29197	0.731004	0.876712	1	0.947599	2313	tags=29%, list=29%, signal=21%	RTEL1/CCNA1/RMI2/XRCC3/EME1/XRCC1/ERCC1/NSD2/MDC1/SPIDR/LIG4/TIPIN/POLE/POLD1/KAT5/SLX4/HERC2
REACTOME_LYSOSOME_VESICLE_BIOGENESIS	REACTOME_LYSOSOME_VESICLE_BIOGENESIS	15	-0.248288	-0.730674	0.802083	1	0.947599	6053	tags=53%, list=75%, signal=13%	HSPA8/CLTA/AP1M2/AP1G1/CLTC/AP4E1/VAMP8/GNS
REACTOME_PROTEIN_FOLDING	REACTOME_PROTEIN_FOLDING	42	-0.207219	-0.730346	0.86747	1	0.947599	302	tags=7%, list=4%, signal=7%	TUBAL3/FBXO4/CCT6B
REACTOME_HOST_INTERACTIONS_OF_HIV_FACTORS	REACTOME_HOST_INTERACTIONS_OF_HIV_FACTORS	68	-0.18681	-0.729105	0.934783	1	0.947599	1736	tags=25%, list=22%, signal=20%	PSMA5/RAC1/PSMD12/NUP93/PSMA1/ELOC/PSMC6/PSMB2/PSMA4/ELMO1/SKP1/PSMA3/NUP37/B2M/PSMB8/PSMA2/PSMA6
REACTOME_MITOTIC_G2_G2_M_PHASES	REACTOME_MITOTIC_G2_G2_M_PHASES	93	0.281307	0.728832	0.898462	1	0.947599	2204	tags=24%, list=27%, signal=17%	GTSE1/CCNA1/CDC25A/CDC25C/CCNB2/E2F1/HAUS5/AURKA/PPP1R12B/CDC25B/CEP131/PCNT/MZT2A/CEP192/LIN54/MZT2B/HAUS8/TUBB2B/FBXL18/CEP164/TUBA4A/PKMYT1
REACTOME_SEALING_OF_THE_NUCLEAR_ENVELOPE_NE_BY_ESCRT_III	REACTOME_SEALING_OF_THE_NUCLEAR_ENVELOPE_NE_BY_ESCRT_III	11	-0.272989	-0.725566	0.794872	1	0.947599	1110	tags=27%, list=14%, signal=24%	CHMP2B/TUBA1C/TUBAL3
REACTOME_SYNDECAN_INTERACTIONS	REACTOME_SYNDECAN_INTERACTIONS	17	0.332199	0.725518	0.79659	1	0.947599	2038	tags=35%, list=25%, signal=26%	COL1A2/ITGB3/SDC3/THBS1/PRKCA/COL5A1
REACTOME_DNA_DAMAGE_RECOGNITION_IN_GG_NER	REACTOME_DNA_DAMAGE_RECOGNITION_IN_GG_NER	20	-0.230376	-0.725517	0.851852	1	0.947599	6198	tags=95%, list=77%, signal=22%	TFPT/MCRS1/COPS7B/PARP2/RAD23A/COPS7A/DDB1/GPS1/RUVBL1/INO80C/CUL4A/COPS6/COPS8/NFRKB/UBA52/COPS3/COPS2/ACTL6A/DDB2
REACTOME_DEATH_RECEPTOR_SIGNALING	REACTOME_DEATH_RECEPTOR_SIGNALING	91	0.280096	0.724197	0.903292	1	0.947599	2563	tags=32%, list=32%, signal=22%	TIAM1/NGF/SMPD3/IKBKE/CLIP3/LINGO1/BAD/ARHGEF40/ARHGEF19/MCF2L/RASGRF2/OBSCN/FGD1/PREX1/ARHGEF17/TRADD/FADD/ITSN1/ARHGDIA/FGD4/PLEKHG5/ARHGEF9/ARHGEF2/MADD/STUB1/TRAF2/ARHGEF26/KALRN/IRAK1
REACTOME_TRANSLESION_SYNTHESIS_BY_Y_FAMILY_DNA_POLYMERASES_BYPASSES_LESIONS_ON_DNA_TEMPLATE	REACTOME_TRANSLESION_SYNTHESIS_BY_Y_FAMILY_DNA_POLYMERASES_BYPASSES_LESIONS_ON_DNA_TEMPLATE	13	0.347753	0.723641	0.784439	1	0.947599	513	tags=8%, list=6%, signal=7%	UBA7
REACTOME_TOLL_LIKE_RECEPTOR_9_TLR9_CASCADE	REACTOME_TOLL_LIKE_RECEPTOR_9_TLR9_CASCADE	63	-0.192257	-0.721931	0.934783	1	0.947599	1867	tags=29%, list=23%, signal=22%	USP14/PIK3R4/PPP2CB/CHUK/PPP2CA/AGER/MAP2K3/RPS6KA3/EEA1/SKP1/VRK3/CASP8/MAP3K8/IKBIP/RPS6KA5/TIFA/MEF2C/IRF5
REACTOME_DISORDERS_OF_TRANSMEMBRANE_TRANSPORTERS	REACTOME_DISORDERS_OF_TRANSMEMBRANE_TRANSPORTERS	83	0.281206	0.719686	0.899482	1	0.947599	1199	tags=12%, list=15%, signal=10%	ABCC8/SLC17A8/SLC6A19/GCK/KCNJ11/SLC24A4/ABCA3/NUP210/SLCO2A1/ABCC2
REACTOME_SARS_COV_2_HOST_INTERACTIONS	REACTOME_SARS_COV_2_HOST_INTERACTIONS	107	-0.175803	-0.718951	1	1	0.947599	1709	tags=26%, list=21%, signal=21%	CNBP/SEC23A/SEC24A/PIK3R4/RPS14/TBK1/RPS6/SAR1B/CHUK/KPNA2/YWHAB/VPS41/MAP1LC3B/ATG14/NUP93/JAK1/SFN/RPS27L/YWHAQ/IFIH1/MASP1/HLA-B/HLA-F/NUP37/B2M/MBL2/TLR2/SMN1
REACTOME_METABOLISM_OF_FAT_SOLUBLE_VITAMINS	REACTOME_METABOLISM_OF_FAT_SOLUBLE_VITAMINS	21	0.319281	0.718025	0.826036	1	0.947599	1310	tags=19%, list=16%, signal=16%	CLPS/LRP2/RBP2/SDC3
REACTOME_AUTOPHAGY	REACTOME_AUTOPHAGY	81	-0.177807	-0.717249	0.945946	1	0.947599	2607	tags=46%, list=32%, signal=31%	VDAC1/UBA52/EEF1A1/LAMP2/PIK3C3/UBAP1/DYNC1LI1/OPTN/DYNLL1/UBE2L3/MFN1/TSG101/TOMM70/CHMP3/ATG4C/ATG4A/GABARAPL2/PARK7/PIK3R4/ATG5/TBK1/MAP1LC3B/ATG14/PRKN/RB1CC1/FUNDC1/PRKAB1/CHMP2B/TUBA1C/VDAC2/IFT88/RRAGC/MTERF3/PRKAA1/CFTR/ATG9B/TUBAL3
REACTOME_RND1_GTPASE_CYCLE	REACTOME_RND1_GTPASE_CYCLE	20	-0.226551	-0.713469	0.864198	1	0.947599	624	tags=100%, list=8%, signal=92%	DLG5/PLEKHG5/WDR6/ANKRD26/CAV1/VANGL2/FLOT2/ARHGAP35/KIDINS220/VANGL1/FAM83B/FRS2/FAM135A/TXNL1/CPD/LEMD3/PTPN13/TMEM59/MUC13
REACTOME_REGULATION_OF_TP53_EXPRESSION_AND_DEGRADATION	REACTOME_REGULATION_OF_TP53_EXPRESSION_AND_DEGRADATION	24	0.310922	0.712958	0.843931	1	0.947599	335	tags=4%, list=4%, signal=4%	CCNA1
REACTOME_O_LINKED_GLYCOSYLATION	REACTOME_O_LINKED_GLYCOSYLATION	53	0.285019	0.71057	0.873539	1	0.947599	1369	tags=21%, list=17%, signal=17%	ADAMTS8/GALNT9/B3GNTL1/GALNT8/ADAMTS19/B3GNT7/ST3GAL4/GALNT16/GALNT4/B3GNT4/THBS1
REACTOME_RAC3_GTPASE_CYCLE	REACTOME_RAC3_GTPASE_CYCLE	38	0.290803	0.707638	0.852781	1	0.947599	1551	tags=16%, list=19%, signal=13%	TIAM1/DOCK10/SRGAP2/MCAM/ARAP3/PREX1
REACTOME_HS_GAG_DEGRADATION	REACTOME_HS_GAG_DEGRADATION	10	-0.276609	-0.707019	0.8	1	0.947599	1839	tags=40%, list=23%, signal=31%	SDC2/GLB1/GPC3/GPC4
REACTOME_HIV_ELONGATION_ARREST_AND_RECOVERY	REACTOME_HIV_ELONGATION_ARREST_AND_RECOVERY	14	-0.25	-0.706526	0.843434	1	0.947599	6039	tags=100%, list=75%, signal=25%	NELFA/POLR2J/NELFB/ELL/POLR2E/CTDP1/NELFE/POLR2A/TCEA1/CCNK/CCNT1/POLR2B/ELOC
REACTOME_GLYCEROPHOSPHOLIPID_BIOSYNTHESIS	REACTOME_GLYCEROPHOSPHOLIPID_BIOSYNTHESIS	65	-0.182055	-0.705806	0.911111	1	0.947599	1050	tags=18%, list=13%, signal=16%	SLC44A3/PLA2R1/CDS1/ALPI/SLC44A4/MBOAT1/GPAT3/PLA1A/MFSD2A/LIPH/PLA2G2A/CHKB
REACTOME_RND2_GTPASE_CYCLE	REACTOME_RND2_GTPASE_CYCLE	23	-0.216876	-0.705704	0.835714	1	0.947599	6307	tags=100%, list=78%, signal=22%	DLG5/PLXND1/FNBP1/WDR6/SCRIB/ANKRD26/CAV1/GOLGA3/VANGL2/NUDC/ARHGAP35/KIDINS220/VANGL1/NISCH/FAM83B/FRS2/LRRC1/TXNL1/KTN1/LEMD3/PTPN13/MUC13
REACTOME_RHOF_GTPASE_CYCLE	REACTOME_RHOF_GTPASE_CYCLE	20	0.315572	0.704362	0.82381	1	0.947599	1143	tags=15%, list=14%, signal=13%	BAIAP2L2/SRGAP2/MCAM
REACTOME_DIFFERENTIATION_OF_KERATINOCYTES_IN_INTERFOLLICULAR_EPIDERMIS_IN_MAMMALIAN_SKIN	REACTOME_DIFFERENTIATION_OF_KERATINOCYTES_IN_INTERFOLLICULAR_EPIDERMIS_IN_MAMMALIAN_SKIN	13	0.338036	0.703422	0.807398	1	0.947599	636	tags=15%, list=8%, signal=14%	DLL1/HOPX
REACTOME_COPI_MEDIATED_ANTEROGRADE_TRANSPORT	REACTOME_COPI_MEDIATED_ANTEROGRADE_TRANSPORT	51	0.282876	0.703051	0.883919	1	0.947599	877	tags=10%, list=11%, signal=9%	INS/DYNC1I1/ANK1/SPTBN4/ANK2
REACTOME_VEGFR2_MEDIATED_CELL_PROLIFERATION	REACTOME_VEGFR2_MEDIATED_CELL_PROLIFERATION	13	0.337809	0.702949	0.807398	1	0.947599	1643	tags=23%, list=20%, signal=18%	ITPR1/SPHK1/PRKCA
REACTOME_TRANSCRIPTIONAL_REGULATION_BY_RUNX3	REACTOME_TRANSCRIPTIONAL_REGULATION_BY_RUNX3	52	0.281609	0.70026	0.882353	1	0.947599	820	tags=8%, list=10%, signal=7%	ITGA4/KAT2B/SPP1/TEAD4
REACTOME_NUCLEOTIDE_EXCISION_REPAIR	REACTOME_NUCLEOTIDE_EXCISION_REPAIR	52	-0.188016	-0.700106	0.925373	1	0.947599	6544	tags=100%, list=81%, signal=19%	ERCC1/INO80E/POLE/POLR2I/POLD1/POLR2J/TFPT/MCRS1/COPS7B/PARP2/RAD23A/ELL/COPS7A/LIG3/POLR2E/UBE2I/DDB1/POLD3/GPS1/SUMO3/POLR2A/ZNF830/RUVBL1/XAB2/GTF2H2/INO80C/CUL4A/COPS6/PIAS1/TCEA1/MNAT1/RNF111/POLE3/COPS8/NFRKB/PPIE/UBE2N/UBA52/SUMO1/COPS3/COPS2/ERCC4/GTF2H1/POLR2B/ACTL6A/RFC4/RPA3/UBE2V2/USP45/DDB2/CCNH
REACTOME_MITOCHONDRIAL_CALCIUM_ION_TRANSPORT	REACTOME_MITOCHONDRIAL_CALCIUM_ION_TRANSPORT	14	0.331345	0.698731	0.812189	1	0.947599	1672	tags=21%, list=21%, signal=17%	SLC8A3/MICU3/MCUB
REACTOME_INTERFERON_GAMMA_SIGNALING	REACTOME_INTERFERON_GAMMA_SIGNALING	48	0.282169	0.697759	0.883298	1	0.947599	1387	tags=19%, list=17%, signal=16%	CAMK2B/NCAM1/HLA-DQA2/OAS1/HLA-DQB1/IRF8/TRIM17/CIITA/MT2A
REACTOME_TP53_REGULATES_TRANSCRIPTION_OF_ADDITIONAL_CELL_CYCLE_GENES_WHOSE_EXACT_ROLE_IN_THE_P53_PATHWAY_REMAIN_UNCERTAIN	REACTOME_TP53_REGULATES_TRANSCRIPTION_OF_ADDITIONAL_CELL_CYCLE_GENES_WHOSE_EXACT_ROLE_IN_THE_P53_PATHWAY_REMAIN_UNCERTAIN	12	0.342503	0.697631	0.819481	1	0.947599	659	tags=8%, list=8%, signal=8%	CDC25C
REACTOME_RUNX1_INTERACTS_WITH_CO_FACTORS_WHOSE_PRECISE_EFFECT_ON_RUNX1_TARGETS_IS_NOT_KNOWN	REACTOME_RUNX1_INTERACTS_WITH_CO_FACTORS_WHOSE_PRECISE_EFFECT_ON_RUNX1_TARGETS_IS_NOT_KNOWN	21	0.310159	0.697512	0.83787	1	0.947599	2656	tags=48%, list=33%, signal=32%	ACTL6B/PHC1/HIPK2/CBX2/CBX6/CSNK2B/RING1/ARID1B/SMARCD1/SMARCC2
REACTOME_SIGNALLING_TO_ERKS	REACTOME_SIGNALLING_TO_ERKS	24	0.303809	0.696647	0.854335	1	0.947599	3180	tags=46%, list=40%, signal=28%	NGF/SHC3/MAPK11/SHC2/MAPK13/MAPK12/RALGDS/MAP2K2/SRC/MAPK3/MAPKAPK3
REACTOME_METABOLISM_OF_PORPHYRINS	REACTOME_METABOLISM_OF_PORPHYRINS	17	-0.225467	-0.696126	0.839779	1	0.947599	1181	tags=29%, list=15%, signal=25%	BLVRB/COX15/GSTA1/UROS/ALB
REACTOME_RHOQ_GTPASE_CYCLE	REACTOME_RHOQ_GTPASE_CYCLE	33	0.290102	0.695757	0.846837	1	0.947599	3349	tags=58%, list=42%, signal=34%	ARHGAP33/SRGAP2/OBSCN/PREX1/ARL13B/FNBP1/CDC42EP4/ITSN1/ARHGEF9/GFOD1/PLEKHG3/SCRIB/WWP2/GIT1/CAV1/SLC4A7/ARHGEF7/RHOQ/ARHGAP17
REACTOME_SULFUR_AMINO_ACID_METABOLISM	REACTOME_SULFUR_AMINO_ACID_METABOLISM	21	-0.215956	-0.694933	0.866242	1	0.947599	1634	tags=33%, list=20%, signal=27%	ADI1/MRI1/GOT2/ADO/CSAD/MAT1A/SQOR
REACTOME_MISCELLANEOUS_TRANSPORT_AND_BINDING_EVENTS	REACTOME_MISCELLANEOUS_TRANSPORT_AND_BINDING_EVENTS	12	-0.253411	-0.693672	0.831897	1	0.947599	1998	tags=58%, list=25%, signal=44%	LRRC8D/NIPA2/MMGT1/NIPAL2/DMTN/MAGT1/MRS2
REACTOME_CITRIC_ACID_CYCLE_TCA_CYCLE	REACTOME_CITRIC_ACID_CYCLE_TCA_CYCLE	16	-0.230726	-0.693669	0.867021	1	0.947599	3362	tags=75%, list=42%, signal=44%	FH/SDHC/DLD/MDH2/SDHB/FXN/IDH3A/IDH3G/SDHD/MRPS36/ISCU/SDHAF3
REACTOME_FORMATION_OF_THE_EARLY_ELONGATION_COMPLEX	REACTOME_FORMATION_OF_THE_EARLY_ELONGATION_COMPLEX	13	-0.249969	-0.693639	0.830275	1	0.947599	6039	tags=100%, list=75%, signal=25%	NELFA/POLR2J/NELFB/POLR2E/CTDP1/NELFE/POLR2A/GTF2H2/MNAT1/GTF2H1/POLR2B/CCNH
REACTOME_ROS_AND_RNS_PRODUCTION_IN_PHAGOCYTES	REACTOME_ROS_AND_RNS_PRODUCTION_IN_PHAGOCYTES	15	0.325526	0.693345	0.819753	1	0.947599	1570	tags=27%, list=20%, signal=22%	LPO/ATP6V1G2/ATP6V0E2/NOS2
REACTOME_ORGANELLE_BIOGENESIS_AND_MAINTENANCE	REACTOME_ORGANELLE_BIOGENESIS_AND_MAINTENANCE	127	0.26384	0.691377	0.944276	1	0.947599	2910	tags=41%, list=36%, signal=27%	SSTR3/BBS1/CNGA4/HAUS5/NPHP1/KIF17/WDR35/SCLT1/PKD1/CEP131/INPP5E/B9D1/PCNT/MAPK11/ATP5ME/IFT81/CEP192/WDR19/NPHP4/FBF1/ARL13B/MARK4/SMO/IFT172/HAUS8/TUBB2B/RAB11FIP3/CEP164/TUBA4A/MKS1/PDE6D/ATP5MF/HCFC1/HDAC6/B9D2/CEP290/ARL3/TUBA1A/IFT140/KIF3A/SFI1/MAPK12/ARL6/ATP5MC1/ATP5F1D/KIF3C/CREBBP/CEP41/TFB1M/MTX1/NINL/HAUS1
REACTOME_ATF4_ACTIVATES_GENES_IN_RESPONSE_TO_ENDOPLASMIC_RETICULUM_STRESS	REACTOME_ATF4_ACTIVATES_GENES_IN_RESPONSE_TO_ENDOPLASMIC_RETICULUM_STRESS	12	0.338566	0.689613	0.82987	1	0.947599	609	tags=8%, list=8%, signal=8%	CXCL8
REACTOME_RHO_GTPASES_ACTIVATE_WASPS_AND_WAVES	REACTOME_RHO_GTPASES_ACTIVATE_WASPS_AND_WAVES	19	-0.218363	-0.686947	0.847953	1	0.947599	2498	tags=58%, list=31%, signal=40%	ARPC3/ACTR2/ARPC2/ARPC1A/ARPC5/ABI1/ACTR3/WASL/WIPF3/RAC1/NCK1
REACTOME_MTORC1_MEDIATED_SIGNALLING	REACTOME_MTORC1_MEDIATED_SIGNALLING	11	-0.25837	-0.68671	0.833333	1	0.947599	5971	tags=36%, list=74%, signal=9%	RPS6KB1/RPS6/YWHAB/RRAGC
REACTOME_PROTEIN_UBIQUITINATION	REACTOME_PROTEIN_UBIQUITINATION	33	0.28616	0.686303	0.854606	1	0.947599	178	tags=3%, list=2%, signal=3%	UBE2C
REACTOME_ONCOGENE_INDUCED_SENESCENCE	REACTOME_ONCOGENE_INDUCED_SENESCENCE	17	0.313688	0.685091	0.844093	1	0.947599	3905	tags=76%, list=49%, signal=39%	E2F1/ID1/AGO4/TNRC6C/ERF/CDK4/MAPK3/TFDP1/ETS2/TNRC6A/TP53/E2F3/TNRC6B
REACTOME_SIGNALING_BY_NTRKS	REACTOME_SIGNALING_BY_NTRKS	76	0.26935	0.685064	0.921794	1	0.947599	1799	tags=18%, list=22%, signal=14%	TIAM1/CDK5R2/NGF/NTRK3/ADORA2A/DNM1/DOCK3/ID4/SHC3/NTRK2/MAPK11/FYN/ID1/SHC2
REACTOME_NUCLEAR_PORE_COMPLEX_NPC_DISASSEMBLY	REACTOME_NUCLEAR_PORE_COMPLEX_NPC_DISASSEMBLY	20	0.306249	0.683552	0.841667	1	0.947599	1054	tags=10%, list=13%, signal=9%	CCNB2/NUP210
REACTOME_INTERCONVERSION_OF_NUCLEOTIDE_DI_AND_TRIPHOSPHATES	REACTOME_INTERCONVERSION_OF_NUCLEOTIDE_DI_AND_TRIPHOSPHATES	18	0.312316	0.683248	0.851762	1	0.947599	231	tags=6%, list=3%, signal=5%	AK5
REACTOME_RHO_GTPASES_ACTIVATE_IQGAPS	REACTOME_RHO_GTPASES_ACTIVATE_IQGAPS	11	-0.256139	-0.68078	0.837607	1	0.947599	2660	tags=55%, list=33%, signal=37%	CLIP1/CTNNA1/IQGAP1/RAC1/TUBA1C/TUBAL3
REACTOME_PCP_CE_PATHWAY	REACTOME_PCP_CE_PATHWAY	49	-0.18895	-0.680012	0.926471	1	0.947599	1736	tags=31%, list=22%, signal=24%	PSMA5/RAC1/PSMD12/FZD6/SMURF2/PSMA1/PSMC6/PSMB2/PSMA4/WNT5A/PSMA3/PSMB8/PSMA2/PSMA6/WNT5B
REACTOME_INSERTION_OF_TAIL_ANCHORED_PROTEINS_INTO_THE_ENDOPLASMIC_RETICULUM_MEMBRANE	REACTOME_INSERTION_OF_TAIL_ANCHORED_PROTEINS_INTO_THE_ENDOPLASMIC_RETICULUM_MEMBRANE	12	0.333486	0.679265	0.842857	1	0.947599	3737	tags=58%, list=46%, signal=31%	GET4/STX1A/HMOX1/EMD/VAMP2/UBE2J2/UBL4A
REACTOME_APC_C_CDH1_MEDIATED_DEGRADATION_OF_CDC20_AND_OTHER_APC_C_CDH1_TARGETED_PROTEINS_IN_LATE_MITOSIS_EARLY_G1	REACTOME_APC_C_CDH1_MEDIATED_DEGRADATION_OF_CDC20_AND_OTHER_APC_C_CDH1_TARGETED_PROTEINS_IN_LATE_MITOSIS_EARLY_G1	33	0.282897	0.678477	0.862375	1	0.947599	1260	tags=12%, list=16%, signal=10%	UBE2C/AURKA/PTTG1/ANAPC15
REACTOME_VISUAL_PHOTOTRANSDUCTION	REACTOME_VISUAL_PHOTOTRANSDUCTION	42	0.276863	0.676026	0.893362	1	0.947599	1643	tags=24%, list=20%, signal=19%	CLPS/HSD17B6/RGS9/LRP2/PPEF1/RBP2/SDC3/STRA6/GRK4/PRKCA
REACTOME_ADAPTIVE_IMMUNE_SYSTEM	REACTOME_ADAPTIVE_IMMUNE_SYSTEM	346	0.250653	0.673341	0.997003	1	0.947599	1141	tags=10%, list=14%, signal=9%	CD96/TRIM63/LCK/UBE2C/ITGA4/PIANP/KIF20A/KIF4A/CENPE/KIF5A/CD300A/UBA7/MRC1/HECW2/HLA-DQA2/KLHL3/CTSE/CD226/DYNC1I1/ASB2/MRC2/WAS/ZAP70/DNM1/SPSB4/RASGRP1/KIF26A/HERC5/HLA-DQB1/TRAIP/RAPGEF4/RAP1GAP2/MADCAM1/COL1A2/CD74
REACTOME_MEIOSIS	REACTOME_MEIOSIS	24	0.293523	0.673061	0.863584	1	0.947599	1549	tags=25%, list=19%, signal=20%	TEX15/STAG3/HSPA2/REC8/PSMC3IP/SYNE2
REACTOME_TRNA_AMINOACYLATION	REACTOME_TRNA_AMINOACYLATION	14	0.31758	0.669704	0.834577	1	0.947599	462	tags=7%, list=6%, signal=7%	SARS2
REACTOME_SELECTIVE_AUTOPHAGY	REACTOME_SELECTIVE_AUTOPHAGY	47	-0.187502	-0.669679	0.944444	1	0.947599	3000	tags=55%, list=37%, signal=35%	HSPA8/TOMM20/EPAS1/TOMM22/UBE2N/VDAC1/UBA52/DYNC1LI1/OPTN/DYNLL1/UBE2L3/MFN1/TOMM70/PARK7/ATG5/TBK1/MAP1LC3B/PRKN/FUNDC1/PRKAB1/TUBA1C/VDAC2/IFT88/MTERF3/CFTR/TUBAL3
REACTOME_ROLE_OF_PHOSPHOLIPIDS_IN_PHAGOCYTOSIS	REACTOME_ROLE_OF_PHOSPHOLIPIDS_IN_PHAGOCYTOSIS	13	0.321772	0.669578	0.836735	1	0.947599	1318	tags=23%, list=16%, signal=19%	PLPP4/PLA2G6/ITPR1
REACTOME_G_PROTEIN_BETA_GAMMA_SIGNALLING	REACTOME_G_PROTEIN_BETA_GAMMA_SIGNALLING	13	0.321444	0.668895	0.83801	1	0.947599	2641	tags=62%, list=33%, signal=41%	GNG11/GNG4/GNG2/PLCB3/PLCB1/PIK3R5/AKT2/AKT1
REACTOME_TP53_REGULATES_METABOLIC_GENES	REACTOME_TP53_REGULATES_METABOLIC_GENES	36	-0.19625	-0.664839	0.935484	1	0.947599	2441	tags=47%, list=30%, signal=33%	COX4I1/YWHAZ/COX6C/NDUFA4/YWHAG/CYCS/TXN/YWHAB/PRDX1/PRKAB1/SFN/YWHAQ/GLS/RRM2B/RRAGC/SESN1/PRKAA1
REACTOME_BRANCHED_CHAIN_AMINO_ACID_CATABOLISM	REACTOME_BRANCHED_CHAIN_AMINO_ACID_CATABOLISM	13	-0.239512	-0.664622	0.857798	1	0.947599	6123	tags=100%, list=76%, signal=24%	ACAD8/PPM1K/SLC25A44/BCKDHB/HSD17B10/MCCC2/BCAT2/DLD/DBT/ALDH6A1/HIBCH/HIBADH
REACTOME_INHIBITION_OF_DNA_RECOMBINATION_AT_TELOMERE	REACTOME_INHIBITION_OF_DNA_RECOMBINATION_AT_TELOMERE	11	-0.249907	-0.664216	0.846154	1	0.947599	6039	tags=82%, list=75%, signal=20%	POLR2E/DAXX/TERF2/ACD/POLR2A/TERF2IP/POT1/POLR2B/TERF1
REACTOME_APOPTOTIC_EXECUTION_PHASE	REACTOME_APOPTOTIC_EXECUTION_PHASE	18	0.302607	0.662008	0.874848	1	0.947599	1222	tags=11%, list=15%, signal=9%	HMGB2/MAPT
REACTOME_GLOBAL_GENOME_NUCLEOTIDE_EXCISION_REPAIR_GG_NER	REACTOME_GLOBAL_GENOME_NUCLEOTIDE_EXCISION_REPAIR_GG_NER	42	-0.187781	-0.661837	0.963855	1	0.947599	6544	tags=100%, list=81%, signal=19%	ERCC1/INO80E/POLE/POLD1/TFPT/MCRS1/COPS7B/PARP2/RAD23A/COPS7A/LIG3/UBE2I/DDB1/POLD3/GPS1/SUMO3/RUVBL1/GTF2H2/INO80C/CUL4A/COPS6/PIAS1/MNAT1/RNF111/POLE3/COPS8/NFRKB/UBE2N/UBA52/SUMO1/COPS3/COPS2/ERCC4/GTF2H1/ACTL6A/RFC4/RPA3/UBE2V2/USP45/DDB2/CCNH
REACTOME_UB_SPECIFIC_PROCESSING_PROTEASES	REACTOME_UB_SPECIFIC_PROCESSING_PROTEASES	94	-0.154936	-0.661215	0.965517	1	0.947599	1554	tags=23%, list=19%, signal=19%	PSMD12/RIPK1/SMURF2/RNF146/PSMA1/PSMC6/PSMB2/RNF128/IFIH1/PSMA4/VDAC2/BIRC3/DDB2/USP44/MDM2/PSMA3/CFTR/IL33/PSMB8/PSMA2/PSMA6/ATXN7
REACTOME_REGULATION_OF_TP53_ACTIVITY_THROUGH_ASSOCIATION_WITH_CO_FACTORS	REACTOME_REGULATION_OF_TP53_ACTIVITY_THROUGH_ASSOCIATION_WITH_CO_FACTORS	10	-0.258586	-0.660952	0.84898	1	0.947599	5969	tags=100%, list=74%, signal=26%	AKT2/AKT1/PPP1R13B/TP53/BANP/PHF20/TP53BP2/PPP1R13L/TP73
REACTOME_G1_S_DNA_DAMAGE_CHECKPOINTS	REACTOME_G1_S_DNA_DAMAGE_CHECKPOINTS	33	0.275588	0.660948	0.880133	1	0.947599	1265	tags=12%, list=16%, signal=10%	CCNA1/CDC25A/CCNE2/PCBP4
REACTOME_PROTEIN_LOCALIZATION	REACTOME_PROTEIN_LOCALIZATION	89	-0.155493	-0.658982	0.9375	1	0.947599	2147	tags=33%, list=27%, signal=24%	TOMM70/PMPCA/TIMM17A/CHCHD2/SERP1/PEX13/SLC25A17/IDE/ACOT2/ATAD1/PHYH/GRPEL2/CROT/EHHADH/IDH1/SCP2/ECI2/PEX3/NUDT19/COX17/ABCD1/UBE2D1/PEX12/GSTK1/COQ2/NUDT7/SLC27A2/ACOX2/PXMP2
REACTOME_SIGNALING_BY_ERYTHROPOIETIN	REACTOME_SIGNALING_BY_ERYTHROPOIETIN	13	-0.237271	-0.658404	0.862385	1	0.947599	6141	tags=100%, list=76%, signal=24%	PIK3CD/PIK3R5/PLCG1/RAPGEF1/JAK2/CRKL/SOS1/KRAS/LYN/PIK3CA/STAT5A/PIK3CB
REACTOME_THE_ROLE_OF_GTSE1_IN_G2_M_PROGRESSION_AFTER_G2_CHECKPOINT	REACTOME_THE_ROLE_OF_GTSE1_IN_G2_M_PROGRESSION_AFTER_G2_CHECKPOINT	33	0.274089	0.657352	0.884573	1	0.947599	669	tags=6%, list=8%, signal=6%	GTSE1/CCNB2
REACTOME_DNA_DAMAGE_BYPASS	REACTOME_DNA_DAMAGE_BYPASS	17	0.298533	0.651991	0.864799	1	0.947599	513	tags=6%, list=6%, signal=6%	UBA7
REACTOME_DEGRADATION_OF_CYSTEINE_AND_HOMOCYSTEINE	REACTOME_DEGRADATION_OF_CYSTEINE_AND_HOMOCYSTEINE	11	0.323777	0.650836	0.86849	1	0.947599	1304	tags=27%, list=16%, signal=23%	CDO1/FMO1/SUOX
REACTOME_SENSORY_PROCESSING_OF_SOUND_BY_OUTER_HAIR_CELLS_OF_THE_COCHLEA	REACTOME_SENSORY_PROCESSING_OF_SOUND_BY_OUTER_HAIR_CELLS_OF_THE_COCHLEA	22	0.287497	0.650629	0.87456	1	0.947599	2387	tags=41%, list=30%, signal=29%	ATP2B2/MYO3A/MPP1/MSN/KCNN2/TPRN/CIB2/TRIOBP/TWF2
REACTOME_COSTIMULATION_BY_THE_CD28_FAMILY	REACTOME_COSTIMULATION_BY_THE_CD28_FAMILY	36	0.2696	0.650398	0.90099	1	0.947599	556	tags=6%, list=7%, signal=5%	LCK/HLA-DQA2
REACTOME_AMINO_ACIDS_REGULATE_MTORC1	REACTOME_AMINO_ACIDS_REGULATE_MTORC1	28	-0.196301	-0.649214	0.927419	1	0.947599	1210	tags=18%, list=15%, signal=15%	ATP6V0E1/BMT2/RRAGC/SESN1/ATP6V1C2
REACTOME_SARS_COV_2_MODULATES_HOST_TRANSLATION_MACHINERY	REACTOME_SARS_COV_2_MODULATES_HOST_TRANSLATION_MACHINERY	26	-0.197001	-0.649022	0.91791	1	0.947599	124	tags=58%, list=2%, signal=57%	RPS4X/RPS16/SNRPD3/DDX20/GEMIN6/RPS3A/GEMIN8/GEMIN2/RPS13/RPS7/RPS15A/RPS14/RPS6/RPS27L/SMN1
REACTOME_TCR_SIGNALING	REACTOME_TCR_SIGNALING	56	0.258603	0.647332	0.926082	1	0.947599	1020	tags=9%, list=13%, signal=8%	LCK/HLA-DQA2/WAS/ZAP70/HLA-DQB1
REACTOME_SIGNALING_BY_CSF3_G_CSF	REACTOME_SIGNALING_BY_CSF3_G_CSF	16	-0.215092	-0.646665	0.909574	1	0.947599	3325	tags=69%, list=41%, signal=40%	KRAS/SYK/CUL5/LYN/STAT3/RNF7/UBA52/STAT5A/JAK1/ELOC/UBE2D1
REACTOME_RHOU_GTPASE_CYCLE	REACTOME_RHOU_GTPASE_CYCLE	26	-0.196242	-0.64652	0.91791	1	0.947599	102	tags=8%, list=1%, signal=8%	NCK1/ARHGEF6
REACTOME_RECOGNITION_OF_DNA_DAMAGE_BY_PCNA_CONTAINING_REPLICATION_COMPLEX	REACTOME_RECOGNITION_OF_DNA_DAMAGE_BY_PCNA_CONTAINING_REPLICATION_COMPLEX	11	-0.243186	-0.646354	0.850427	1	0.947599	6093	tags=55%, list=76%, signal=13%	WDR48/POLE3/UBA52/RFC4/RPA3/UBE2B
REACTOME_SNRNP_ASSEMBLY	REACTOME_SNRNP_ASSEMBLY	28	-0.195332	-0.646008	0.927419	1	0.947599	455	tags=7%, list=6%, signal=7%	NUP37/SMN1
REACTOME_ACTIVATION_OF_IRF3_IRF7_MEDIATED_BY_TBK1_IKK_IKBKE	REACTOME_ACTIVATION_OF_IRF3_IRF7_MEDIATED_BY_TBK1_IKK_IKBKE	10	0.324081	0.641632	0.870542	1	0.947599	2711	tags=50%, list=34%, signal=33%	IKBKE/IRF7/SARM1/TLR4/IRF3
REACTOME_PKR_MEDIATED_SIGNALING	REACTOME_PKR_MEDIATED_SIGNALING	45	0.261179	0.641077	0.921336	1	0.947599	1645	tags=20%, list=20%, signal=16%	FANCA/FANCG/HERC5/MAP2K6/FANCE/MAPT/HSPA2/SPHK1/HSPA1A
REACTOME_ACTIVATED_TAK1_MEDIATES_P38_MAPK_ACTIVATION	REACTOME_ACTIVATED_TAK1_MEDIATES_P38_MAPK_ACTIVATION	12	0.31438	0.640349	0.877922	1	0.947599	3180	tags=50%, list=40%, signal=30%	MAP2K6/MAPK11/IRAK1/TAB1/UBE2V1/MAPKAPK3
REACTOME_FGFR2_ALTERNATIVE_SPLICING	REACTOME_FGFR2_ALTERNATIVE_SPLICING	10	-0.249876	-0.638687	0.873469	1	0.947599	6039	tags=100%, list=75%, signal=25%	POLR2J/PTBP1/HNRNPH1/POLR2E/ESRP2/POLR2A/TIAL1/POLR2B/ESRP1
REACTOME_MICRORNA_MIRNA_BIOGENESIS	REACTOME_MICRORNA_MIRNA_BIOGENESIS	10	-0.249876	-0.638687	0.873469	1	0.947599	6039	tags=100%, list=75%, signal=25%	DGCR8/AGO4/POLR2J/POLR2E/TARBP2/POLR2A/RAN/POLR2B/PRKRA
REACTOME_MITOCHONDRIAL_TRANSLATION	REACTOME_MITOCHONDRIAL_TRANSLATION	62	-0.168712	-0.63766	0.955556	1	0.947599	6700	tags=50%, list=83%, signal=8%	MRPL58/GFM1/MRPS10/MRPL20/MRPS33/GFM2/MRPL14/MRPL3/MRPL30/MRPL48/OXA1L/MRPL42/DAP3/MRRF/MRPL2/MRPS17/MRPL19/MRPS36/MRPS35/MTIF2/CHCHD1/MRPS6/MRPL50/MRPL44/MTFMT/MRPL15/MRPL47/MRPL13/MRPL32/MTIF3/MRPL53
REACTOME_IKK_COMPLEX_RECRUITMENT_MEDIATED_BY_RIP1	REACTOME_IKK_COMPLEX_RECRUITMENT_MEDIATED_BY_RIP1	12	-0.23267	-0.636896	0.87931	1	0.947599	1671	tags=33%, list=21%, signal=26%	CHUK/RIPK1/BIRC3/UBE2D1
REACTOME_E2F_MEDIATED_REGULATION_OF_DNA_REPLICATION	REACTOME_E2F_MEDIATED_REGULATION_OF_DNA_REPLICATION	12	0.312122	0.635749	0.885714	1	0.947599	1803	tags=25%, list=22%, signal=19%	E2F1/POLA2/MCM8
REACTOME_CYCLIN_A_CDK2_ASSOCIATED_EVENTS_AT_S_PHASE_ENTRY	REACTOME_CYCLIN_A_CDK2_ASSOCIATED_EVENTS_AT_S_PHASE_ENTRY	44	0.259377	0.634294	0.928726	1	0.947599	1157	tags=11%, list=14%, signal=10%	CCNA1/CDC25A/E2F1/CCNE2/CDC25B
REACTOME_GENE_SILENCING_BY_RNA	REACTOME_GENE_SILENCING_BY_RNA	34	-0.189718	-0.632857	0.957895	1	0.947599	455	tags=6%, list=6%, signal=6%	NUP37/PIWIL2
REACTOME_ENDOGENOUS_STEROLS	REACTOME_ENDOGENOUS_STEROLS	10	0.319243	0.632054	0.879789	1	0.947599	1029	tags=20%, list=13%, signal=17%	CYP1B1/ARNT2
REACTOME_INTERLEUKIN_17_SIGNALING	REACTOME_INTERLEUKIN_17_SIGNALING	36	-0.186521	-0.631882	0.946237	1	0.947599	1720	tags=28%, list=21%, signal=22%	PPP2CB/CHUK/PPP2CA/MAP2K3/RPS6KA3/SKP1/VRK3/MAP3K8/RPS6KA5/MEF2C
REACTOME_METABOLIC_DISORDERS_OF_BIOLOGICAL_OXIDATION_ENZYMES	REACTOME_METABOLIC_DISORDERS_OF_BIOLOGICAL_OXIDATION_ENZYMES	11	0.314026	0.631235	0.886719	1	0.947599	1132	tags=27%, list=14%, signal=23%	CYP1B1/TBXAS1/CYP26B1
REACTOME_DUAL_INCISION_IN_TC_NER	REACTOME_DUAL_INCISION_IN_TC_NER	24	-0.192471	-0.630563	0.927007	1	0.947599	6503	tags=100%, list=81%, signal=19%	POLE/POLR2I/POLD1/POLR2J/POLR2E/DDB1/POLD3/POLR2A/ZNF830/XAB2/GTF2H2/CUL4A/TCEA1/MNAT1/POLE3/PPIE/UBA52/ERCC4/GTF2H1/POLR2B/RFC4/RPA3/CCNH
REACTOME_UNFOLDED_PROTEIN_RESPONSE_UPR	REACTOME_UNFOLDED_PROTEIN_RESPONSE_UPR	49	0.25455	0.630015	0.93469	1	0.947599	609	tags=4%, list=8%, signal=4%	EXTL1/CXCL8
REACTOME_RHO_GTPASES_ACTIVATE_NADPH_OXIDASES	REACTOME_RHO_GTPASES_ACTIVATE_NADPH_OXIDASES	11	0.312682	0.628535	0.889323	1	0.947599	2337	tags=36%, list=29%, signal=26%	PIN1/MAPK11/PRKCA/NOXA1
REACTOME_TRANSCRIPTION_COUPLED_NUCLEOTIDE_EXCISION_REPAIR_TC_NER	REACTOME_TRANSCRIPTION_COUPLED_NUCLEOTIDE_EXCISION_REPAIR_TC_NER	34	-0.187594	-0.625771	0.957895	1	0.947599	6544	tags=100%, list=81%, signal=19%	ERCC1/POLE/POLR2I/POLD1/POLR2J/COPS7B/ELL/COPS7A/LIG3/POLR2E/DDB1/POLD3/GPS1/POLR2A/ZNF830/XAB2/GTF2H2/CUL4A/COPS6/TCEA1/MNAT1/POLE3/COPS8/PPIE/UBA52/COPS3/COPS2/ERCC4/GTF2H1/POLR2B/RFC4/RPA3/CCNH
REACTOME_MAPK6_MAPK4_SIGNALING	REACTOME_MAPK6_MAPK4_SIGNALING	41	0.256653	0.6248	0.927711	1	0.947599	145	tags=2%, list=2%, signal=2%	MMP2
REACTOME_ACYL_CHAIN_REMODELLING_OF_PE	REACTOME_ACYL_CHAIN_REMODELLING_OF_PE	11	0.310391	0.62393	0.890625	1	0.947599	1589	tags=27%, list=20%, signal=22%	PLA2G3/PLA2G6/LPCAT3
REACTOME_RAC2_GTPASE_CYCLE	REACTOME_RAC2_GTPASE_CYCLE	41	0.255931	0.623043	0.930997	1	0.947599	1143	tags=10%, list=14%, signal=8%	TIAM1/DOCK10/DOCK3/MCAM
REACTOME_SIGNALING_BY_ERBB2	REACTOME_SIGNALING_BY_ERBB2	27	0.267142	0.621604	0.925544	1	0.947599	262	tags=4%, list=3%, signal=4%	NRG3
REACTOME_GLYCOSPHINGOLIPID_METABOLISM	REACTOME_GLYCOSPHINGOLIPID_METABOLISM	28	0.264111	0.617702	0.92369	1	0.947599	546	tags=7%, list=7%, signal=7%	ST8SIA5/SMPD3
REACTOME_RNA_POLYMERASE_II_PRE_TRANSCRIPTION_EVENTS	REACTOME_RNA_POLYMERASE_II_PRE_TRANSCRIPTION_EVENTS	39	-0.180566	-0.614523	0.977011	1	0.947599	2366	tags=44%, list=29%, signal=31%	CCNK/GTF2A2/TAF11/TBP/LEO1/TAF9/GTF2H1/CCNT1/POLR2B/GTF2E1/GTF2E2/TAF7/GTF2A1/ELOC/TAF5/MLLT3/CCNH
REACTOME_STRIATED_MUSCLE_CONTRACTION	REACTOME_STRIATED_MUSCLE_CONTRACTION	14	0.29125	0.61418	0.884328	1	0.947599	240	tags=7%, list=3%, signal=7%	ACTN3
REACTOME_RECRUITMENT_OF_NUMA_TO_MITOTIC_CENTROSOMES	REACTOME_RECRUITMENT_OF_NUMA_TO_MITOTIC_CENTROSOMES	40	0.250977	0.609093	0.942731	1	0.947599	3830	tags=65%, list=48%, signal=34%	HAUS5/CEP131/PCNT/MZT2A/CEP192/MZT2B/HAUS8/TUBB2B/CEP164/TUBA4A/TUBG2/CEP290/TUBA1A/SFI1/CEP41/NINL/HAUS1/CEP72/DCTN1/CCP110/NUMA1/TUBGCP6/SSNA1/PRKACA/TUBGCP2/AKAP9
REACTOME_HDR_THROUGH_SINGLE_STRAND_ANNEALING_SSA	REACTOME_HDR_THROUGH_SINGLE_STRAND_ANNEALING_SSA	11	0.302441	0.607947	0.902344	1	0.947599	2121	tags=27%, list=26%, signal=20%	RMI2/ERCC1/KAT5
REACTOME_DARPP_32_EVENTS	REACTOME_DARPP_32_EVENTS	13	-0.218593	-0.606575	0.912844	1	0.947599	1720	tags=69%, list=21%, signal=55%	CALM1/PPP3CB/PRKAR1A/PPP3CC/PPP2R1B/PPP2CB/PPP2CA/PDE4D/PDE4A
REACTOME_DISEASES_OF_CARBOHYDRATE_METABOLISM	REACTOME_DISEASES_OF_CARBOHYDRATE_METABOLISM	16	0.280795	0.606141	0.895577	1	0.947599	707	tags=12%, list=9%, signal=11%	KHK/PPP1R3C
REACTOME_FCERI_MEDIATED_CA_2_MOBILIZATION	REACTOME_FCERI_MEDIATED_CA_2_MOBILIZATION	14	-0.214116	-0.605114	0.919192	1	0.947599	1332	tags=21%, list=17%, signal=18%	VAV3/NFATC1/GRAP2
REACTOME_RAB_GEFS_EXCHANGE_GTP_FOR_GDP_ON_RABS	REACTOME_RAB_GEFS_EXCHANGE_GTP_FOR_GDP_ON_RABS	41	0.247953	0.60362	0.945235	1	0.947599	1234	tags=12%, list=15%, signal=10%	RAB39A/DENND2A/RAB39B/RAB3A/RAB3IL1
REACTOME_ERCC6_CSB_AND_EHMT2_G9A_POSITIVELY_REGULATE_RRNA_EXPRESSION	REACTOME_ERCC6_CSB_AND_EHMT2_G9A_POSITIVELY_REGULATE_RRNA_EXPRESSION	12	-0.220438	-0.603414	0.900862	1	0.947599	6276	tags=100%, list=78%, signal=22%	EHMT2/CHD3/MBD3/CHD4/RBBP7/GATAD2A/HDAC2/GATAD2B/MTA3/CBX3/TTF1
REACTOME_REGULATION_OF_RAS_BY_GAPS	REACTOME_REGULATION_OF_RAS_BY_GAPS	33	0.250209	0.600082	0.933407	1	0.947599	1305	tags=12%, list=16%, signal=10%	RASA4/RASA3/SPRED3/SYNGAP1
REACTOME_HDMS_DEMETHYLATE_HISTONES	REACTOME_HDMS_DEMETHYLATE_HISTONES	13	0.28816	0.599634	0.905612	1	0.947599	2947	tags=54%, list=37%, signal=34%	KDM5D/KDM6B/PHF8/KDM4B/PHF2/JMJD6/KDM5C
REACTOME_INTERFERON_SIGNALING	REACTOME_INTERFERON_SIGNALING	145	0.226618	0.596597	0.990927	1	0.947599	1393	tags=15%, list=17%, signal=13%	CAMK2B/NCAM1/UBA7/HLA-DQA2/IFI6/FANCA/OAS1/FANCG/HERC5/HLA-DQB1/MAP2K6/NUP210/IRF8/TRIM17/FANCE/MAPT/BST2/HSPA2/PIN1/CIITA/MT2A/KPNA5
REACTOME_CRISTAE_FORMATION	REACTOME_CRISTAE_FORMATION	16	-0.198257	-0.59605	0.941489	1	0.947599	6455	tags=94%, list=80%, signal=19%	ATP5MF/ATP5MC1/ATP5F1D/MTX1/CHCHD3/SAMM50/IMMT/HSPA9/ATP5F1A/ATP5PB/ATP5PO/APOOL/ATP5MC3/TMEM11/MT-ATP8
REACTOME_CONSTITUTIVE_SIGNALING_BY_AKT1_E17K_IN_CANCER	REACTOME_CONSTITUTIVE_SIGNALING_BY_AKT1_E17K_IN_CANCER	20	0.266786	0.595471	0.909524	1	0.947599	3450	tags=50%, list=43%, signal=29%	BAD/FOXO6/MTOR/FOXO4/AKT2/AKT1/CDKN1B/TSC2/GSK3A/PRR5
REACTOME_P38MAPK_EVENTS	REACTOME_P38MAPK_EVENTS	10	0.300069	0.594093	0.92074	1	0.947599	3180	tags=60%, list=40%, signal=36%	MAPK11/MAPK13/MAPK12/RALGDS/SRC/MAPKAPK3
REACTOME_ORC1_REMOVAL_FROM_CHROMATIN	REACTOME_ORC1_REMOVAL_FROM_CHROMATIN	34	0.245577	0.591159	0.942668	1	0.947599	1363	tags=15%, list=17%, signal=12%	CCNA1/CDC6/MCM2/CDT1/MCM5
REACTOME_FLT3_SIGNALING_IN_DISEASE	REACTOME_FLT3_SIGNALING_IN_DISEASE	12	-0.213592	-0.584674	0.913793	1	0.947599	6331	tags=75%, list=79%, signal=16%	TRIP11/SPTBN1/SOS1/KRAS/GOLGB1/PIK3CA/UBA52/STAT5A/ETV6
REACTOME_CHAPERONE_MEDIATED_AUTOPHAGY	REACTOME_CHAPERONE_MEDIATED_AUTOPHAGY	11	-0.219941	-0.584572	0.91453	1	0.947599	3169	tags=73%, list=39%, signal=44%	HSP90AB1/HSPA8/UBA52/EEF1A1/LAMP2/PARK7/IFT88/CFTR
REACTOME_TGF_BETA_RECEPTOR_SIGNALING_ACTIVATES_SMADS	REACTOME_TGF_BETA_RECEPTOR_SIGNALING_ACTIVATES_SMADS	25	0.252927	0.582505	0.935484	1	0.947599	1477	tags=16%, list=18%, signal=13%	FBN1/LTBP4/ITGB3/LTBP2
REACTOME_DISASSEMBLY_OF_THE_DESTRUCTION_COMPLEX_AND_RECRUITMENT_OF_AXIN_TO_THE_MEMBRANE	REACTOME_DISASSEMBLY_OF_THE_DESTRUCTION_COMPLEX_AND_RECRUITMENT_OF_AXIN_TO_THE_MEMBRANE	15	0.272956	0.581374	0.91358	1	0.947599	2761	tags=40%, list=34%, signal=26%	FZD1/DVL1/DVL2/AXIN1/DVL3/CAV1
REACTOME_SUMOYLATION_OF_TRANSCRIPTION_FACTORS	REACTOME_SUMOYLATION_OF_TRANSCRIPTION_FACTORS	12	-0.21185	-0.579904	0.913793	1	0.947599	6345	tags=100%, list=79%, signal=21%	MTA1/TP53BP1/PIAS4/UBE2I/TP53/SUMO3/PIAS1/MITF/SUMO1/SP3/MDM2
REACTOME_BUDDING_AND_MATURATION_OF_HIV_VIRION	REACTOME_BUDDING_AND_MATURATION_OF_HIV_VIRION	13	0.278637	0.579818	0.914541	1	0.947599	1515	tags=23%, list=19%, signal=19%	VPS37D/CHMP6/MVB12B
REACTOME_BETA_CATENIN_INDEPENDENT_WNT_SIGNALING	REACTOME_BETA_CATENIN_INDEPENDENT_WNT_SIGNALING	75	0.227524	0.577703	0.978079	1	0.947599	1693	tags=19%, list=21%, signal=15%	AXIN2/PRKCG/GNAO1/PRICKLE1/GNG11/GNG4/ITPR1/WNT11/PARD6A/GNG2/FZD1/PRKCA/TCF7/DVL1
REACTOME_NON_INTEGRIN_MEMBRANE_ECM_INTERACTIONS	REACTOME_NON_INTEGRIN_MEMBRANE_ECM_INTERACTIONS	33	0.240136	0.575923	0.950055	1	0.947599	1651	tags=27%, list=21%, signal=22%	COL4A6/COL1A2/ITGB3/COL4A1/SDC3/THBS1/COL4A2/PRKCA/COL4A5
REACTOME_FCERI_MEDIATED_MAPK_ACTIVATION	REACTOME_FCERI_MEDIATED_MAPK_ACTIVATION	12	-0.21006	-0.575006	0.913793	1	0.947599	1649	tags=67%, list=20%, signal=53%	SOS1/KRAS/SYK/LYN/PAK2/RAC1/VAV3/GRAP2
REACTOME_GROWTH_HORMONE_RECEPTOR_SIGNALING	REACTOME_GROWTH_HORMONE_RECEPTOR_SIGNALING	13	-0.206648	-0.573427	0.93578	1	0.947599	6387	tags=100%, list=79%, signal=21%	SOCS1/SH2B1/PTPN6/MAPK3/JAK2/LYN/STAT3/ADAM17/GHR/STAT5A/CISH/PRLR
REACTOME_TRAF6_MEDIATED_IRF7_ACTIVATION	REACTOME_TRAF6_MEDIATED_IRF7_ACTIVATION	10	0.288744	0.57167	0.931308	1	0.947599	2769	tags=50%, list=34%, signal=33%	IKBKE/IRF7/TRAF2/IRF3/CREBBP
REACTOME_CELLULAR_RESPONSE_TO_HEAT_STRESS	REACTOME_CELLULAR_RESPONSE_TO_HEAT_STRESS	59	0.228056	0.570983	0.973656	1	0.947599	1294	tags=8%, list=16%, signal=7%	CAMK2B/HSPA6/COL4A6/NUP210/HSPA2
REACTOME_SIGNALING_BY_CSF1_M_CSF_IN_MYELOID_CELLS	REACTOME_SIGNALING_BY_CSF1_M_CSF_IN_MYELOID_CELLS	14	-0.201818	-0.570358	0.939394	1	0.947599	6426	tags=100%, list=80%, signal=20%	GAB2/PIK3CD/INPPL1/SRC/SOS1/KRAS/LYN/STAT3/PIK3CA/YES1/UBA52/PIK3CB/GRAP2
REACTOME_REGULATION_OF_ENDOGENOUS_RETROELEMENTS	REACTOME_REGULATION_OF_ENDOGENOUS_RETROELEMENTS	42	0.233067	0.569089	0.969532	1	0.947599	2792	tags=38%, list=35%, signal=25%	DPF1/ZNF418/ZNF324/ZNF778/ZNF519/MTA1/EHMT2/SS18L1/CHD3/ZNF30/DNMT3A/ARID1B/SMARCD1/SMARCC2/TRIM28/MBD3
REACTOME_FORMATION_OF_RNA_POL_II_ELONGATION_COMPLEX	REACTOME_FORMATION_OF_RNA_POL_II_ELONGATION_COMPLEX	26	-0.172693	-0.56894	0.962687	1	0.947599	6662	tags=27%, list=83%, signal=5%	LEO1/GTF2H1/CCNT1/POLR2B/ELOC/MLLT3/CCNH
REACTOME_AMINO_ACID_TRANSPORT_ACROSS_THE_PLASMA_MEMBRANE	REACTOME_AMINO_ACID_TRANSPORT_ACROSS_THE_PLASMA_MEMBRANE	15	0.266983	0.568653	0.916049	1	0.947599	307	tags=7%, list=4%, signal=6%	SLC6A19
REACTOME_SIGNALING_BY_FLT3_FUSION_PROTEINS	REACTOME_SIGNALING_BY_FLT3_FUSION_PROTEINS	11	-0.213566	-0.567627	0.940171	1	0.947599	6331	tags=73%, list=79%, signal=16%	TRIP11/SPTBN1/SOS1/KRAS/GOLGB1/PIK3CA/STAT5A/ETV6
REACTOME_CHROMATIN_MODIFYING_ENZYMES	REACTOME_CHROMATIN_MODIFYING_ENZYMES	110	0.216916	0.567531	0.986882	1	0.947599	3313	tags=46%, list=41%, signal=28%	HDAC10/KAT2B/PRDM16/ACTL6B/SAP30/GPS2/KMT2D/TRRAP/NSD2/MTA1/EHMT2/CHD3/KAT5/KMT2B/KDM5D/EP400/TAF10/ASH1L/NCOR2/SETD1B/KAT2A/HCFC1/DMAP1/KMT5C/KDM6B/DNMT3A/PRMT6/KMT2A/ARID1B/RUVBL2/PHF8/SMARCD1/KDM4B/SMARCC2/NFKB1/PHF2/CREBBP/MBD3/SETD1A/JMJD6/KDM5C/SMARCA4/ATXN7L3/BRPF1/CDK4/MCRS1/HMG20B/ELP5/PRMT5/PRMT7/CHD4
REACTOME_DUAL_INCISION_IN_GG_NER	REACTOME_DUAL_INCISION_IN_GG_NER	15	-0.192255	-0.565778	0.96875	1	0.947599	6503	tags=40%, list=81%, signal=8%	UBA52/ERCC4/GTF2H1/RFC4/RPA3/DDB2
REACTOME_NUCLEAR_ENVELOPE_BREAKDOWN	REACTOME_NUCLEAR_ENVELOPE_BREAKDOWN	26	0.244474	0.565431	0.952765	1	0.947599	1768	tags=15%, list=22%, signal=12%	CCNB2/NUP210/PRKCA/VRK1
REACTOME_NGF_STIMULATED_TRANSCRIPTION	REACTOME_NGF_STIMULATED_TRANSCRIPTION	17	0.258291	0.564105	0.93179	1	0.947599	2550	tags=41%, list=32%, signal=28%	CDK5R2/ID4/ID1/ID3/ELK1/VGF/CDK5R1
REACTOME_ESTROGEN_DEPENDENT_NUCLEAR_EVENTS_DOWNSTREAM_OF_ESR_MEMBRANE_SIGNALING	REACTOME_ESTROGEN_DEPENDENT_NUCLEAR_EVENTS_DOWNSTREAM_OF_ESR_MEMBRANE_SIGNALING	10	0.284709	0.563682	0.93395	1	0.947599	457	tags=10%, list=6%, signal=9%	BCL2
REACTOME_TRANSCRIPTIONAL_REGULATION_BY_RUNX1	REACTOME_TRANSCRIPTIONAL_REGULATION_BY_RUNX1	83	0.219165	0.560906	0.986528	1	0.947599	2697	tags=33%, list=34%, signal=22%	MYB/KAT2B/ACTL6B/NR4A3/THBS1/KMT2D/PHC1/ZFPM1/NFATC2/HIPK2/CBX2/TCF3/KMT2B/CBX6/CSNK2B/AGO4/RING1/SETD1B/CCND3/AXIN1/PRMT6/TNRC6C/KMT2A/ARID1B/SMARCD1/SMARCC2/LGALS3
REACTOME_CYTOKINE_SIGNALING_IN_IMMUNE_SYSTEM	REACTOME_CYTOKINE_SIGNALING_IN_IMMUNE_SYSTEM	347	0.208467	0.56006	1	1	0.947599	1393	tags=12%, list=17%, signal=10%	LCK/MMP2/CAMK2B/NCAM1/SNAP25/BIRC5/EDAR/PTPRZ1/CXCL1/BCL2/TNFRSF11A/IL10RA/UBA7/HLA-DQA2/CXCL8/IFI6/IL1RAPL1/TNFSF13/FANCA/OAS1/FANCG/IL20RB/HERC5/PELI3/HLA-DQB1/MAP2K6/NUP210/IRF8/TRIM17/IL15/COL1A2/F13A1/FANCE/MAPT/BST2/LTB/ZEB1/HSPA2/PIN1/CIITA/MT2A/KPNA5
REACTOME_EPHB_MEDIATED_FORWARD_SIGNALING	REACTOME_EPHB_MEDIATED_FORWARD_SIGNALING	27	0.238886	0.555856	0.965636	1	0.947599	2521	tags=26%, list=31%, signal=18%	TIAM1/FYN/EFNB3/ITSN1/LIMK2/ARHGEF28/KALRN
REACTOME_INTRINSIC_PATHWAY_FOR_APOPTOSIS	REACTOME_INTRINSIC_PATHWAY_FOR_APOPTOSIS	34	0.230234	0.554224	0.960309	1	0.947599	1086	tags=9%, list=13%, signal=8%	BCL2/E2F1/BAD
REACTOME_EPHRIN_SIGNALING	REACTOME_EPHRIN_SIGNALING	12	-0.201767	-0.552306	0.926724	1	0.947599	6426	tags=100%, list=80%, signal=20%	EFNB3/GIT1/SRC/ARHGEF7/EPHB2/EPHB4/NCK2/PAK2/SDCBP/RAC1/EPHB3
REACTOME_MRNA_SPLICING_MINOR_PATHWAY	REACTOME_MRNA_SPLICING_MINOR_PATHWAY	21	-0.171215	-0.55096	0.968153	1	0.947599	6673	tags=86%, list=83%, signal=15%	DDX23/PRPF6/SNRNP200/POLR2E/SNRPF/TXNL4A/PDCD7/POLR2A/SF3B2/SF3B1/SNRNP25/SNRPD3/ZRSR2/POLR2B/SNRNP35/SNRNP48/SF3B6/ZCRB1
REACTOME_TNF_SIGNALING	REACTOME_TNF_SIGNALING	34	0.228504	0.550059	0.961411	1	0.947599	989	tags=9%, list=12%, signal=8%	SMPD3/IKBKE/CLIP3
REACTOME_PERK_REGULATES_GENE_EXPRESSION	REACTOME_PERK_REGULATES_GENE_EXPRESSION	16	0.254395	0.549152	0.936118	1	0.947599	609	tags=6%, list=8%, signal=6%	CXCL8
REACTOME_POSITIVE_EPIGENETIC_REGULATION_OF_RRNA_EXPRESSION	REACTOME_POSITIVE_EPIGENETIC_REGULATION_OF_RRNA_EXPRESSION	25	0.237467	0.546901	0.959677	1	0.947599	441	tags=4%, list=5%, signal=4%	KAT2B
REACTOME_POLYMERASE_SWITCHING_ON_THE_C_STRAND_OF_THE_TELOMERE	REACTOME_POLYMERASE_SWITCHING_ON_THE_C_STRAND_OF_THE_TELOMERE	13	0.261813	0.544808	0.934949	1	0.947599	2094	tags=23%, list=26%, signal=17%	CHTF18/POLA2/POLD1
REACTOME_SUMOYLATION_OF_TRANSCRIPTION_COFACTORS	REACTOME_SUMOYLATION_OF_TRANSCRIPTION_COFACTORS	26	0.235162	0.543893	0.965438	1	0.947599	6160	tags=100%, list=77%, signal=24%	PHC1/HIPK2/CBX2/NCOR2/RING1/TRIM28/CREBBP/DDX17/PIAS4/CTBP1/UBE2I/DAXX/SUMO3/MBD1/MRTFA/NRIP1/PIAS1/ING2/NPM1/ZNF131/NCOA2/SUMO1/TOPORS/RNF2/BMI1/PARK7
REACTOME_ANTIVIRAL_MECHANISM_BY_IFN_STIMULATED_GENES	REACTOME_ANTIVIRAL_MECHANISM_BY_IFN_STIMULATED_GENES	90	0.210203	0.543259	0.992798	1	0.947599	1479	tags=14%, list=18%, signal=12%	UBA7/FANCA/OAS1/FANCG/HERC5/MAP2K6/NUP210/FANCE/MAPT/HSPA2/PIN1/KPNA5/SPHK1
REACTOME_AKT_PHOSPHORYLATES_TARGETS_IN_THE_CYTOSOL	REACTOME_AKT_PHOSPHORYLATES_TARGETS_IN_THE_CYTOSOL	10	0.274129	0.542736	0.945839	1	0.947599	3337	tags=60%, list=41%, signal=35%	BAD/AKT2/AKT1/CDKN1B/TSC2/GSK3A
REACTOME_APOPTOSIS	REACTOME_APOPTOSIS	84	0.211915	0.542251	0.989627	1	0.947599	771	tags=6%, list=10%, signal=5%	DCC/BCL2/HMGB2/UNC5A/E2F1
REACTOME_LATE_ENDOSOMAL_MICROAUTOPHAGY	REACTOME_LATE_ENDOSOMAL_MICROAUTOPHAGY	17	0.247563	0.540674	0.937881	1	0.947599	1849	tags=29%, list=23%, signal=23%	VPS37D/CHMP6/MVB12B/PCNT/ARL13B
REACTOME_ENDOSOMAL_SORTING_COMPLEX_REQUIRED_FOR_TRANSPORT_ESCRT	REACTOME_ENDOSOMAL_SORTING_COMPLEX_REQUIRED_FOR_TRANSPORT_ESCRT	15	0.252345	0.537474	0.930864	1	0.947599	1515	tags=20%, list=19%, signal=16%	VPS37D/CHMP6/MVB12B
REACTOME_SIGNALING_BY_VEGF	REACTOME_SIGNALING_BY_VEGF	57	0.214813	0.536855	0.984161	1	0.947599	3186	tags=42%, list=40%, signal=26%	FLT4/FLT1/ITGB3/ITPR1/SPHK1/VEGFB/MAPK11/FYN/PRKCA/SHC2/MTOR/BAIAP2/AKT2/AKT1/PXN/MAPK13/MAPK12/PLCG1/CAV1/AAMP/SRC/DOCK1/MAPKAPK3/NRP2
REACTOME_RNA_POLYMERASE_III_TRANSCRIPTION	REACTOME_RNA_POLYMERASE_III_TRANSCRIPTION	22	-0.166625	-0.536799	0.973154	1	0.947599	6710	tags=100%, list=83%, signal=17%	NFIX/SNAPC4/BRF2/SNAPC2/BRF1/POLR3E/POLR3D/POLR3K/GTF3C1/POLR2E/POLR3A/GTF3C6/POLR1D/GTF3C2/TBP/GTF3C3/GTF3A/SSB/NFIC/ZNF143/POLR3G
REACTOME_SIGNALING_BY_TGFBR3	REACTOME_SIGNALING_BY_TGFBR3	21	-0.166729	-0.536524	0.968153	1	0.947599	6709	tags=95%, list=83%, signal=16%	TCF3/AGO4/INHBA/TNRC6C/RXRA/ARRB1/SMAD3/TNRC6A/TGFBR1/TNRC6B/APH1A/APH1B/TCF12/INHA/SP1/TGFB1/PSEN1/TGFBR3/NCSTN/MYCN
REACTOME_DDX58_IFIH1_MEDIATED_INDUCTION_OF_INTERFERON_ALPHA_BETA	REACTOME_DDX58_IFIH1_MEDIATED_INDUCTION_OF_INTERFERON_ALPHA_BETA	37	0.22157	0.535736	0.978022	1	0.947599	1342	tags=11%, list=17%, signal=9%	UBA7/IKBKE/HERC5/PIN1
REACTOME_RNA_POLYMERASE_III_TRANSCRIPTION_INITIATION_FROM_TYPE_3_PROMOTER	REACTOME_RNA_POLYMERASE_III_TRANSCRIPTION_INITIATION_FROM_TYPE_3_PROMOTER	12	-0.195171	-0.534248	0.952586	1	0.947599	6479	tags=100%, list=81%, signal=20%	BRF2/SNAPC2/POLR3E/POLR3D/POLR3K/POLR2E/POLR3A/POLR1D/TBP/ZNF143/POLR3G
REACTOME_GLUTAMATE_AND_GLUTAMINE_METABOLISM	REACTOME_GLUTAMATE_AND_GLUTAMINE_METABOLISM	12	0.260539	0.530683	0.955844	1	0.947599	477	tags=8%, list=6%, signal=8%	GLS2
REACTOME_EPIGENETIC_REGULATION_OF_GENE_EXPRESSION	REACTOME_EPIGENETIC_REGULATION_OF_GENE_EXPRESSION	98	0.203675	0.529438	0.993878	1	0.947599	2852	tags=33%, list=35%, signal=21%	KAT2B/DPF1/SAP30/ZNF418/PAGR1/KMT2D/ZNF324/ZNF778/ZNF519/DNMT3B/MTA1/EHMT2/MEN1/SS18L1/CHD3/PHF19/KMT2B/HCFC2/ZNF30/SETD1B/KAT2A/HCFC1/DNMT3A/KMT2A/ARID1B/SMARCD1/TET1/SMARCC2/TRIM28/MBD3/TET3/SETD1A
REACTOME_SIGNALING_BY_INTERLEUKINS	REACTOME_SIGNALING_BY_INTERLEUKINS	189	0.199376	0.529194	1	1	0.947599	682	tags=5%, list=8%, signal=5%	LCK/MMP2/SNAP25/BIRC5/PTPRZ1/CXCL1/BCL2/IL10RA/CXCL8/IL1RAPL1
REACTOME_HIV_LIFE_CYCLE	REACTOME_HIV_LIFE_CYCLE	73	-0.132071	-0.52828	1	1	0.947599	6994	tags=100%, list=87%, signal=13%	VPS37D/CHMP6/MVB12B/CXCR4/LIG4/TAF6/POLR2I/TAF10/HMGA1/NELFA/POLR2J/VPS28/NUP85/POM121C/RANGAP1/NELFB/NUP188/ELL/RANBP1/NUP62/POLR2E/RCC1/CD4/CTDP1/NUP153/NUP88/NELFE/POLR2A/NMT1/NUP98/TAF2/GTF2H2/SEH1L/NUP58/TPR/NUP50/TCEA1/BANF1/MNAT1/XRCC5/VPS37B/NUP133/NUP54/XRCC6/TAF9B/KPNA1/CCNK/RAN/UBA52/GTF2A2/UBAP1/TAF11/PDCD6IP/TBP/TSG101/VPS4B/CHMP3/TAF9/GTF2H1/CCNT1/POLR2B/GTF2E1/GTF2E2/TAF7/GTF2A1/VT…
REACTOME_SUMOYLATION_OF_UBIQUITINYLATION_PROTEINS	REACTOME_SUMOYLATION_OF_UBIQUITINYLATION_PROTEINS	21	-0.163889	-0.527386	0.968153	1	0.947599	5150	tags=95%, list=64%, signal=34%	NUP85/POM121C/PIAS4/NUP188/NUP62/UBE2I/NUP153/NUP88/NUP98/SEH1L/PIAS1/NUP58/TPR/NUP50/NUP133/NUP54/SUMO1/NUP93/MDM2/NUP37
REACTOME_RNA_POLYMERASE_I_TRANSCRIPTION_INITIATION	REACTOME_RNA_POLYMERASE_I_TRANSCRIPTION_INITIATION	24	0.229499	0.52625	0.968786	1	0.947599	441	tags=4%, list=5%, signal=4%	KAT2B
REACTOME_SMAD2_SMAD3_SMAD4_HETEROTRIMER_REGULATES_TRANSCRIPTION	REACTOME_SMAD2_SMAD3_SMAD4_HETEROTRIMER_REGULATES_TRANSCRIPTION	18	0.239918	0.524864	0.952612	1	0.947599	3437	tags=50%, list=43%, signal=29%	COL1A2/TGIF2/MEN1/SMAD7/E2F4/MAPK3/E2F5/TFDP1/SMAD3
REACTOME_HCMV_LATE_EVENTS	REACTOME_HCMV_LATE_EVENTS	27	0.223812	0.520781	0.975945	1	0.947599	1515	tags=15%, list=19%, signal=12%	NUP210/VPS37D/CHMP6/MVB12B
REACTOME_SIGNALING_BY_TGF_BETA_RECEPTOR_COMPLEX	REACTOME_SIGNALING_BY_TGF_BETA_RECEPTOR_COMPLEX	50	0.208317	0.51745	0.982979	1	0.947599	1477	tags=14%, list=18%, signal=12%	FBN1/COL1A2/LTBP4/TGIF2/ITGB3/PARD6A/LTBP2
REACTOME_INFLUENZA_INFECTION	REACTOME_INFLUENZA_INFECTION	77	-0.132137	-0.51734	1	1	0.947599	6994	tags=48%, list=87%, signal=6%	RPL21/RPL9/KPNA4/NUP133/RPS3A/NUP54/RPL14/RPL4/RPL32/KPNA1/CLTA/RPS13/RPL19/RPL28/RPL7/RAN/UBA52/RPS7/RPL37/RPL5/TGFB1/RPS15A/RPL15/CLTC/POLR2B/RPS14/RPL24/RPL23/RPS6/RPL39L/KPNA2/NUP93/CANX/DNAJC3/RPS27L/RPL26L1/NUP37
REACTOME_TRANSPORT_OF_MATURE_MRNAS_DERIVED_FROM_INTRONLESS_TRANSCRIPTS	REACTOME_TRANSPORT_OF_MATURE_MRNAS_DERIVED_FROM_INTRONLESS_TRANSCRIPTS	20	-0.164132	-0.516896	0.981481	1	0.947599	5150	tags=95%, list=64%, signal=34%	NUP85/SYMPK/POM121C/CPSF1/NUP188/NUP62/NUP153/NUP88/NUP98/SEH1L/NUP58/TPR/NUP50/NUP133/NUP54/CPSF3/FIP1L1/NUP93/NUP37
REACTOME_SIGNALING_BY_NOTCH4	REACTOME_SIGNALING_BY_NOTCH4	47	0.207553	0.511248	0.986022	1	0.947599	728	tags=6%, list=9%, signal=6%	KAT2B/DLL4/FLT4
REACTOME_CELLULAR_RESPONSES_TO_STIMULI	REACTOME_CELLULAR_RESPONSES_TO_STIMULI	365	0.188564	0.50781	1	1	0.947599	1321	tags=7%, list=16%, signal=6%	PGR/EXTL1/MT1G/UBE2C/CAMK2B/HIF3A/CCNA1/BCL2/CXCL8/ATP6V1G2/DYNC1I1/HSPA6/E2F1/COL4A6/WTIP/CCNE2/CREB3L3/MAP2K6/NUP210/EGLN3/TXNRD2/MT1E/ANAPC15/ATP6V0E2/HSPA2/SRXN1
REACTOME_INTRA_GOLGI_TRAFFIC	REACTOME_INTRA_GOLGI_TRAFFIC	21	0.22546	0.507033	0.956213	1	0.947599	332	tags=5%, list=4%, signal=5%	RAB39A
REACTOME_COMPLEX_III_ASSEMBLY	REACTOME_COMPLEX_III_ASSEMBLY	12	-0.184839	-0.505968	0.965517	1	0.947599	6562	tags=58%, list=82%, signal=11%	HSPA9/UQCRC2/FXN/UQCRB/TTC19/UQCRH/ISCU
REACTOME_KSRP_KHSRP_BINDS_AND_DESTABILIZES_MRNA	REACTOME_KSRP_KHSRP_BINDS_AND_DESTABILIZES_MRNA	10	-0.197486	-0.504779	0.979592	1	0.947599	6460	tags=100%, list=80%, signal=20%	EXOSC9/AKT1/KHSRP/MAPK14/EXOSC6/EXOSC3/YWHAZ/EXOSC1/EXOSC7
REACTOME_AGGREPHAGY	REACTOME_AGGREPHAGY	22	-0.155784	-0.501874	0.986577	1	0.947599	1358	tags=23%, list=17%, signal=19%	PRKN/TUBA1C/IFT88/CFTR/TUBAL3
REACTOME_INTERACTIONS_OF_REV_WITH_HOST_CELLULAR_PROTEINS	REACTOME_INTERACTIONS_OF_REV_WITH_HOST_CELLULAR_PROTEINS	21	-0.155629	-0.500805	0.980892	1	0.947599	5150	tags=95%, list=64%, signal=34%	NUP85/POM121C/RANGAP1/NUP188/RANBP1/NUP62/RCC1/NUP153/NUP88/NUP98/SEH1L/NUP58/TPR/NUP50/NUP133/NPM1/NUP54/RAN/NUP93/NUP37
REACTOME_TRNA_PROCESSING	REACTOME_TRNA_PROCESSING	59	-0.131839	-0.497368	1	1	0.947599	6994	tags=100%, list=87%, signal=13%	ADAT3/CDKAL1/TRMT9B/WDR4/POP1/OSGEP/TRMT112/CTU1/FTSJ1/RPP25/GTPBP3/QTRT1/PUS1/NUP85/PUS7/POM121C/ELAC2/CPSF1/NUP188/NUP62/NUP153/POP5/RPP14/THG1L/NUP88/NUP98/HSD17B10/RTCB/SEH1L/TRMU/NUP58/TPR/NUP50/TRMT11/XPOT/NSUN2/TYW3/NUP133/TRMT10A/NUP54/TP53RK/PUS3/RAN/RPP30/THADA/TRNT1/TYW5/RTRAF/MTO1/ZBTB8OS/RPP40/TRMT12/TRMT5/NUP93/C2orf49/TRMT10C/ADAT2/NUP37
REACTOME_SIGNALING_BY_ACTIVIN	REACTOME_SIGNALING_BY_ACTIVIN	11	0.246678	0.495856	0.96875	1	0.947599	1396	tags=18%, list=17%, signal=15%	ACVR1C/FOXH1
REACTOME_HIV_INFECTION	REACTOME_HIV_INFECTION	114	-0.122154	-0.492453	1	1	0.947599	2891	tags=43%, list=36%, signal=28%	XRCC6/TAF9B/PAK2/KPNA1/AP1M2/PSMD1/CCNK/RAN/UBA52/AP1G1/GTF2A2/PSMD13/UBAP1/TAF11/PDCD6IP/TBP/TSG101/VPS4B/CHMP3/TAF9/PSMD5/GTF2H1/CCNT1/POLR2B/GTF2E1/PSMA5/RAC1/GTF2E2/TAF7/GTF2A1/PSMD12/VTA1/NUP93/PSMA1/ELOC/PSMC6/TAF5/PSMB2/PSMA4/CHMP2B/ELMO1/SKP1/PSMA3/CCNH/NUP37/B2M/PSMB8/PSMA2/PSMA6
REACTOME_TP53_REGULATES_TRANSCRIPTION_OF_DNA_REPAIR_GENES	REACTOME_TP53_REGULATES_TRANSCRIPTION_OF_DNA_REPAIR_GENES	28	0.209943	0.491013	0.981777	1	0.947599	800	tags=7%, list=10%, signal=6%	FANCD2/FANCI
REACTOME_METABOLISM_OF_LIPIDS	REACTOME_METABOLISM_OF_LIPIDS	356	0.18232	0.490371	1	1	0.947599	1103	tags=8%, list=14%, signal=7%	ACSM6/SGPP2/FABP7/ST8SIA5/CYP1B1/PLA2G3/TSPOAP1/BAAT/LTC4S/SMPD3/HMGCS2/ALDH3B1/ALOX15B/PNPLA7/CERS1/TSPO/SPTSSB/GPD1/PRKD1/SLC27A1/LRP2/PCYT1B/CPNE7/INPP4B/TBXAS1/ARNT2/DEGS2/PLA2G6/GPS2
REACTOME_SYNTHESIS_OF_PIPS_AT_THE_EARLY_ENDOSOME_MEMBRANE	REACTOME_SYNTHESIS_OF_PIPS_AT_THE_EARLY_ENDOSOME_MEMBRANE	11	0.242373	0.487202	0.971354	1	0.947599	3639	tags=55%, list=45%, signal=30%	INPP4B/PI4K2B/FIG4/INPP4A/VAC14/INPP5F
REACTOME_NEGATIVE_REGULATION_OF_MAPK_PATHWAY	REACTOME_NEGATIVE_REGULATION_OF_MAPK_PATHWAY	26	0.21062	0.487132	0.983871	1	0.947599	1003	tags=8%, list=12%, signal=7%	DUSP2/DUSP9
REACTOME_ANTIGEN_PROCESSING_UBIQUITINATION_PROTEASOME_DEGRADATION	REACTOME_ANTIGEN_PROCESSING_UBIQUITINATION_PROTEASOME_DEGRADATION	158	0.182594	0.481592	1	1	0.947599	759	tags=4%, list=9%, signal=4%	TRIM63/UBE2C/UBA7/HECW2/KLHL3/ASB2/SPSB4
REACTOME_NR1H3_NR1H2_REGULATE_GENE_EXPRESSION_LINKED_TO_CHOLESTEROL_TRANSPORT_AND_EFFLUX	REACTOME_NR1H3_NR1H2_REGULATE_GENE_EXPRESSION_LINKED_TO_CHOLESTEROL_TRANSPORT_AND_EFFLUX	17	-0.155079	-0.478804	0.994475	1	0.947599	299	tags=12%, list=4%, signal=11%	EEPD1/APOD
REACTOME_NEGATIVE_EPIGENETIC_REGULATION_OF_RRNA_EXPRESSION	REACTOME_NEGATIVE_EPIGENETIC_REGULATION_OF_RRNA_EXPRESSION	23	-0.147117	-0.478711	0.992857	1	0.947599	2428	tags=91%, list=30%, signal=64%	SAP30BP/BAZ2A/POLR2E/POLR1A/SIN3B/SAP30L/TAF1C/GTF2H2/HDAC2/MNAT1/POLR1D/TAF1A/SAP130/MBD2/TBP/ARID4B/GTF2H1/TAF1D/SIRT1/TTF1/CCNH
REACTOME_TELOMERE_C_STRAND_LAGGING_STRAND_SYNTHESIS	REACTOME_TELOMERE_C_STRAND_LAGGING_STRAND_SYNTHESIS	14	0.226619	0.477887	0.961443	1	0.947599	2094	tags=21%, list=26%, signal=16%	CHTF18/POLA2/POLD1
REACTOME_LEISHMANIA_INFECTION	REACTOME_LEISHMANIA_INFECTION	81	0.186382	0.476447	0.997927	1	0.947599	1920	tags=22%, list=24%, signal=17%	GNAZ/WAS/ADCY2/ADCY1/GNG11/GNG4/ADCY3/ITPR1/ADCY7/ADCY8/GNG2/ENTPD1/NT5E/FYN/DVL1/ADCY9/DVL2/HMOX1
REACTOME_SUMOYLATION_OF_SUMOYLATION_PROTEINS	REACTOME_SUMOYLATION_OF_SUMOYLATION_PROTEINS	20	-0.150737	-0.474712	0.987654	1	0.947599	5150	tags=95%, list=64%, signal=34%	NUP85/POM121C/PIAS4/NUP188/NUP62/UBE2I/NUP153/NUP88/NUP98/SEH1L/NUP58/TPR/NUP50/NUP133/NUP54/SUMO1/TOPORS/NUP93/NUP37
REACTOME_DNA_DOUBLE_STRAND_BREAK_RESPONSE	REACTOME_DNA_DOUBLE_STRAND_BREAK_RESPONSE	21	0.209916	0.472078	0.973964	1	0.947599	3749	tags=62%, list=47%, signal=33%	NSD2/MDC1/KAT5/HERC2/KDM4B/TP53BP1/PIAS4/ABL1/BAP1/PPP5C/UBE2I/APBB1/TP53
REACTOME_RHOD_GTPASE_CYCLE	REACTOME_RHOD_GTPASE_CYCLE	28	-0.14243	-0.471048	0.991935	1	0.947599	6905	tags=93%, list=86%, signal=13%	ARHGAP39/CAV1/DBN1/SLC4A7/EMD/ARHGAP17/ACTN1/ARHGAP35/ESYT1/VANGL1/ANKFY1/VAPB/TOR1AIP1/ADD3/PGRMC2/ARHGAP12/RAB7A/MOSPD2/ARHGAP32/LEMD3/WHAMM/VAMP3/DIAPH1/LMAN1/PAK6/FILIP1
REACTOME_SYNTHESIS_OF_PIPS_AT_THE_PLASMA_MEMBRANE	REACTOME_SYNTHESIS_OF_PIPS_AT_THE_PLASMA_MEMBRANE	29	-0.141935	-0.46696	1	1	0.947599	2066	tags=31%, list=26%, signal=23%	MTMR6/PIK3R3/RAB14/PTPN13/PLEKHA3/MTM1/PIK3CB/INPP5J/PIK3C2G
REACTOME_TRANSCRIPTIONAL_ACTIVITY_OF_SMAD2_SMAD3_SMAD4_HETEROTRIMER	REACTOME_TRANSCRIPTIONAL_ACTIVITY_OF_SMAD2_SMAD3_SMAD4_HETEROTRIMER	25	-0.141379	-0.465198	0.985075	1	0.947599	6913	tags=44%, list=86%, signal=6%	USP9X/CCNK/SNW1/UBA52/SP1/TGIF1/CCNT1/SMAD2/CCNC/SMURF2/UBE2D1
REACTOME_G2_M_DNA_DAMAGE_CHECKPOINT	REACTOME_G2_M_DNA_DAMAGE_CHECKPOINT	27	0.198929	0.462882	0.990836	1	0.947599	2313	tags=22%, list=29%, signal=16%	CDC25C/RMI2/NSD2/MDC1/KAT5/HERC2
REACTOME_HCMV_INFECTION	REACTOME_HCMV_INFECTION	49	0.185373	0.458801	0.991435	1	0.947599	2737	tags=29%, list=34%, signal=19%	DYNC1I1/NUP210/GPS2/VPS37D/CHMP6/MVB12B/TUBB2B/TUBA4A/ELK1/NCOR2/TUBA1A/NFKB1/TRIM28/VPS28
REACTOME_RNA_POLYMERASE_I_TRANSCRIPTION	REACTOME_RNA_POLYMERASE_I_TRANSCRIPTION	28	0.194359	0.454568	0.98861	1	0.947599	441	tags=4%, list=5%, signal=3%	KAT2B
REACTOME_SARS_COV_INFECTIONS	REACTOME_SARS_COV_INFECTIONS	219	0.169885	0.453055	1	1	0.947599	889	tags=5%, list=11%, signal=4%	ANO3/MGAT4C/ITGA4/FXYD6/ANO4/IKBKE/ANO7/SMN2/SAP30/ZDHHC11
REACTOME_DOWNREGULATION_OF_SMAD2_3_SMAD4_TRANSCRIPTIONAL_ACTIVITY	REACTOME_DOWNREGULATION_OF_SMAD2_3_SMAD4_TRANSCRIPTIONAL_ACTIVITY	15	-0.153779	-0.452549	1	1	0.947599	6812	tags=47%, list=85%, signal=7%	USP9X/SNW1/UBA52/TGIF1/SMAD2/SMURF2/UBE2D1
REACTOME_METABOLISM_OF_AMINO_ACIDS_AND_DERIVATIVES	REACTOME_METABOLISM_OF_AMINO_ACIDS_AND_DERIVATIVES	181	0.168698	0.447057	1	1	0.947599	1165	tags=7%, list=14%, signal=6%	PRODH/CARNS1/TDO2/GLS2/OCA2/NAGS/PNMT/AASS/CDO1/NAT8L/FMO1/ALDH4A1/TAT
REACTOME_SUMOYLATION_OF_DNA_DAMAGE_RESPONSE_AND_REPAIR_PROTEINS	REACTOME_SUMOYLATION_OF_DNA_DAMAGE_RESPONSE_AND_REPAIR_PROTEINS	35	-0.131444	-0.446801	1	1	0.947599	6994	tags=14%, list=87%, signal=2%	NUP93/SP100/NSMCE3/NSMCE2/NUP37
REACTOME_REGULATION_OF_TP53_ACTIVITY	REACTOME_REGULATION_OF_TP53_ACTIVITY	82	0.173953	0.445216	0.997934	1	0.947599	2792	tags=26%, list=35%, signal=17%	CCNA1/RMI2/AURKA/MAP2K6/PIN1/MAPK11/EHMT2/TAF6/NUAK1/HIPK2/MTOR/POU4F1/CHD3/KAT5/TAF10/CSNK2B/AKT2/CDK5R1/AKT1/PPP1R13B/MBD3
REACTOME_RNA_POLYMERASE_III_TRANSCRIPTION_TERMINATION	REACTOME_RNA_POLYMERASE_III_TRANSCRIPTION_TERMINATION	11	0.221373	0.444991	0.983073	1	0.947599	1432	tags=18%, list=18%, signal=15%	NFIB/NFIX
REACTOME_ISG15_ANTIVIRAL_MECHANISM	REACTOME_ISG15_ANTIVIRAL_MECHANISM	46	0.176861	0.435511	0.995694	1	0.947599	1393	tags=11%, list=17%, signal=9%	UBA7/HERC5/NUP210/PIN1/KPNA5
REACTOME_TRANSCRIPTIONAL_REGULATION_BY_E2F6	REACTOME_TRANSCRIPTIONAL_REGULATION_BY_E2F6	16	0.20175	0.435509	0.984029	1	0.947599	1788	tags=19%, list=22%, signal=15%	E2F1/PHC1/EHMT2
REACTOME_REGULATION_OF_ENDOGENOUS_RETROELEMENTS_BY_KRAB_ZFP_PROTEINS	REACTOME_REGULATION_OF_ENDOGENOUS_RETROELEMENTS_BY_KRAB_ZFP_PROTEINS	26	0.186971	0.432436	0.991935	1	0.947599	2792	tags=35%, list=35%, signal=23%	ZNF418/ZNF324/ZNF778/ZNF519/MTA1/CHD3/ZNF30/TRIM28/MBD3
REACTOME_TRNA_PROCESSING_IN_THE_NUCLEUS	REACTOME_TRNA_PROCESSING_IN_THE_NUCLEUS	31	-0.131379	-0.431874	1	1	0.947599	6994	tags=90%, list=87%, signal=12%	NUP85/POM121C/ELAC2/CPSF1/NUP188/NUP62/NUP153/POP5/RPP14/NUP88/NUP98/RTCB/SEH1L/NUP58/TPR/NUP50/XPOT/NUP133/NUP54/RAN/RPP30/TRNT1/RTRAF/ZBTB8OS/RPP40/NUP93/C2orf49/NUP37
REACTOME_NUCLEAR_IMPORT_OF_REV_PROTEIN	REACTOME_NUCLEAR_IMPORT_OF_REV_PROTEIN	19	-0.136995	-0.430973	1	1	0.947599	5150	tags=95%, list=64%, signal=34%	NUP85/POM121C/NUP188/NUP62/RCC1/NUP153/NUP88/NUP98/SEH1L/NUP58/TPR/NUP50/NUP133/NPM1/NUP54/RAN/NUP93/NUP37
REACTOME_SUMOYLATION_OF_RNA_BINDING_PROTEINS	REACTOME_SUMOYLATION_OF_RNA_BINDING_PROTEINS	24	-0.131264	-0.430041	0.992701	1	0.947599	6994	tags=100%, list=87%, signal=13%	PHC1/CBX2/RING1/NUP85/POM121C/NUP188/NUP62/UBE2I/NUP153/NUP88/NUP98/SEH1L/NUP58/TPR/NUP50/NUP133/NUP54/HNRNPC/SUMO1/RNF2/BMI1/NUP93/NUP37
REACTOME_RHOV_GTPASE_CYCLE	REACTOME_RHOV_GTPASE_CYCLE	25	0.185524	0.427273	0.993088	1	0.947599	2102	tags=16%, list=26%, signal=12%	ZNF512B/PARD6A/DLG5/WDR6
REACTOME_TRANSCRIPTIONAL_REGULATION_BY_SMALL_RNAS	REACTOME_TRANSCRIPTIONAL_REGULATION_BY_SMALL_RNAS	23	-0.131248	-0.427073	0.992857	1	0.947599	6994	tags=91%, list=87%, signal=12%	POLR2J/NUP85/POM121C/NUP188/TNRC6A/NUP62/POLR2E/NUP153/NUP88/POLR2A/NUP98/SEH1L/NUP58/TPR/NUP50/NUP133/NUP54/RAN/POLR2B/NUP93/NUP37
REACTOME_RHOG_GTPASE_CYCLE	REACTOME_RHOG_GTPASE_CYCLE	39	0.175244	0.426468	0.996721	1	0.947599	2786	tags=31%, list=35%, signal=20%	DOCK3/MCAM/MCF2L/PREX1/ITSN1/ARHGDIA/PLEKHG3/ARHGEF26/KALRN/ARHGAP39/CAV1/TRIO
REACTOME_SARS_COV_2_INFECTION	REACTOME_SARS_COV_2_INFECTION	158	0.160302	0.422796	1	1	0.947599	1375	tags=8%, list=17%, signal=6%	ANO3/MGAT4C/ANO4/IKBKE/ANO7/SMN2/ZDHHC11/NUP210/ST3GAL4/CHMP6/SDC3/SNRPG
REACTOME_TRANSPORT_OF_THE_SLBP_DEPENDANT_MATURE_MRNA	REACTOME_TRANSPORT_OF_THE_SLBP_DEPENDANT_MATURE_MRNA	16	-0.140618	-0.422763	1	1	0.947599	455	tags=94%, list=6%, signal=89%	NUP85/POM121C/NUP188/NUP62/NUP153/NUP88/NUP98/SEH1L/NUP58/TPR/NUP50/NUP133/NUP54/NUP93/NUP37
REACTOME_INTERACTIONS_OF_VPR_WITH_HOST_CELLULAR_PROTEINS	REACTOME_INTERACTIONS_OF_VPR_WITH_HOST_CELLULAR_PROTEINS	21	-0.131215	-0.422242	0.987261	1	0.947599	6994	tags=90%, list=87%, signal=12%	NUP85/POM121C/NUP188/NUP62/SLC25A6/NUP153/SLC25A4/NUP88/NUP98/SEH1L/NUP58/TPR/NUP50/BANF1/NUP133/NUP54/KPNA1/NUP93/NUP37
REACTOME_VIRAL_MESSENGER_RNA_SYNTHESIS	REACTOME_VIRAL_MESSENGER_RNA_SYNTHESIS	21	-0.131215	-0.422242	0.987261	1	0.947599	6994	tags=90%, list=87%, signal=12%	POLR2J/NUP85/POM121C/NUP188/NUP62/POLR2E/NUP153/NUP88/POLR2A/NUP98/SEH1L/NUP58/TPR/NUP50/NUP133/NUP54/POLR2B/NUP93/NUP37
REACTOME_CYCLIN_D_ASSOCIATED_EVENTS_IN_G1	REACTOME_CYCLIN_D_ASSOCIATED_EVENTS_IN_G1	27	0.180194	0.419288	0.993127	1	0.947599	946	tags=7%, list=12%, signal=7%	E2F1/CCNE2
REACTOME_INFECTIOUS_DISEASE	REACTOME_INFECTIOUS_DISEASE	491	0.154791	0.417807	1	1	0.947599	1652	tags=10%, list=21%, signal=9%	ANO3/LCK/MGAT4C/ITGA4/SNAP25/FXYD6/STX1B/MRC1/ANO4/GNAZ/DYNC1I1/CORO1A/WAS/IKBKE/SV2A/ADCY2/ADCY1/ANO7/SMN2/SYT2/SAP30/ZDHHC11/HERC5/GNG11/MAP2K6/NUP210/GNG4/GPS2/ST3GAL4/VPS37D/BST2/ADCY3/CHMP6/SDC3/ITPR1/SNRPG/KPNA5/ADCY7/ADCY8/RIPK3/GNG2/MVB12B/STX1A/NOS2/ENTPD1/MED25/NT5E/FYN/HSPA1A/CXCR4
REACTOME_RRNA_PROCESSING	REACTOME_RRNA_PROCESSING	104	0.159635	0.416357	1	1	0.947599	111	tags=1%, list=1%, signal=1%	PWP2
REACTOME_EXPORT_OF_VIRAL_RIBONUCLEOPROTEINS_FROM_NUCLEUS	REACTOME_EXPORT_OF_VIRAL_RIBONUCLEOPROTEINS_FROM_NUCLEUS	18	-0.131166	-0.412955	1	1	0.947599	6994	tags=11%, list=87%, signal=1%	NUP93/NUP37
REACTOME_TGFBR3_EXPRESSION	REACTOME_TGFBR3_EXPRESSION	12	0.201608	0.410647	0.993506	1	0.947599	3551	tags=58%, list=44%, signal=33%	TCF4/TCF3/AGO4/TNRC6C/RXRA/SMAD3/TNRC6A
REACTOME_TRANSCRIPTIONAL_REGULATION_BY_TP53	REACTOME_TRANSCRIPTIONAL_REGULATION_BY_TP53	173	0.154198	0.407582	1	1	0.947599	1342	tags=8%, list=17%, signal=7%	BIRC5/CCNA1/GLS2/CDC25C/FANCD2/E2F1/FANCI/RMI2/AURKA/CCNE2/MAP2K6/IGFBP3/PCBP4/PIN1
REACTOME_HCMV_EARLY_EVENTS	REACTOME_HCMV_EARLY_EVENTS	38	0.160243	0.389933	0.997819	1	0.947599	3759	tags=50%, list=47%, signal=27%	DYNC1I1/NUP210/GPS2/TUBB2B/TUBA4A/ELK1/NCOR2/TUBA1A/NFKB1/TRIM28/NUP85/POM121C/DYNLL2/NUP188/RBBP7/TBL1X/NUP62/DAXX/NUP153
REACTOME_COPI_INDEPENDENT_GOLGI_TO_ER_RETROGRADE_TRAFFIC	REACTOME_COPI_INDEPENDENT_GOLGI_TO_ER_RETROGRADE_TRAFFIC	24	0.168572	0.386543	0.996532	1	0.947599	1098	tags=8%, list=14%, signal=7%	DYNC1I1/PLA2G6
REACTOME_ZBP1_DAI_MEDIATED_INDUCTION_OF_TYPE_I_IFNS	REACTOME_ZBP1_DAI_MEDIATED_INDUCTION_OF_TYPE_I_IFNS	12	0.187578	0.38207	0.997403	1	0.947599	6539	tags=100%, list=81%, signal=19%	RIPK3/NFKB1/IRF3/NFKB2/IKBKB/RELA/NFKBIA/NKIRAS2/MYD88/TBK1/CHUK/RIPK1
REACTOME_PYRUVATE_METABOLISM	REACTOME_PYRUVATE_METABOLISM	20	0.170717	0.381043	0.996429	1	0.947599	2872	tags=35%, list=36%, signal=23%	PDK4/PDK3/RMND5B/NEK1/HAGH/PGAM5/PDHA1
REACTOME_PROCESSING_OF_SMDT1	REACTOME_PROCESSING_OF_SMDT1	10	0.191637	0.379413	0.996037	1	0.947599	1672	tags=20%, list=21%, signal=16%	MICU3/MCUB
REACTOME_PHOSPHOLIPID_METABOLISM	REACTOME_PHOSPHOLIPID_METABOLISM	112	0.144914	0.378562	1	1	0.947599	2532	tags=29%, list=31%, signal=20%	PLA2G3/PNPLA7/GPD1/PCYT1B/CPNE7/INPP4B/PLA2G6/PLEKHA4/BCHE/SLC44A2/INPP5E/MTMR7/LPCAT3/MIGA2/PEMT/PLB1/AGPAT4/PLEKHA6/MTMR3/PITPNM3/PIK3CD/ETNK2/PIK3R5/LPCAT4/SBF1/CSNK2B/OSBPL5/PIK3C2B/PLA2G4C/GDPD5/PISD/PITPNM2
REACTOME_PROCESSING_OF_CAPPED_INTRONLESS_PRE_MRNA	REACTOME_PROCESSING_OF_CAPPED_INTRONLESS_PRE_MRNA	11	0.185937	0.373758	0.996094	1	0.947599	6552	tags=100%, list=81%, signal=19%	SNRPG/PABPN1/SYMPK/CPSF1/SNRPF/CSTF2T/SNRPD3/PAPOLA/CSTF3/CPSF3/FIP1L1
REACTOME_NUCLEAR_ENVELOPE_NE_REASSEMBLY	REACTOME_NUCLEAR_ENVELOPE_NE_REASSEMBLY	34	-0.111976	-0.373527	1	1	0.947599	1666	tags=21%, list=21%, signal=16%	PPP2CA/NUP93/PPP2R2A/CHMP2B/TUBA1C/NUP37/TUBAL3
REACTOME_RIP_MEDIATED_NFKB_ACTIVATION_VIA_ZBP1	REACTOME_RIP_MEDIATED_NFKB_ACTIVATION_VIA_ZBP1	10	0.187531	0.371284	0.996037	1	0.947599	6539	tags=100%, list=81%, signal=19%	RIPK3/NFKB1/NFKB2/IKBKB/RELA/NFKBIA/NKIRAS2/MYD88/CHUK/RIPK1
REACTOME_NR1H2_AND_NR1H3_MEDIATED_SIGNALING	REACTOME_NR1H2_AND_NR1H3_MEDIATED_SIGNALING	19	0.166798	0.368135	0.997593	1	0.947599	3551	tags=53%, list=44%, signal=29%	GPS2/ANGPTL3/AGO4/NCOR2/TNRC6C/NR1H3/RXRB/RXRA/TBL1X/TNRC6A
REACTOME_REGULATION_OF_HSF1_MEDIATED_HEAT_SHOCK_RESPONSE	REACTOME_REGULATION_OF_HSF1_MEDIATED_HEAT_SHOCK_RESPONSE	47	0.148956	0.366911	1	1	0.947599	1294	tags=9%, list=16%, signal=7%	HSPA6/COL4A6/NUP210/HSPA2
REACTOME_PI_METABOLISM	REACTOME_PI_METABOLISM	48	0.14503	0.358635	1	1	0.947599	3102	tags=40%, list=39%, signal=24%	PNPLA7/INPP4B/PLEKHA4/INPP5E/MTMR7/PLEKHA6/MTMR3/PIK3CD/PIK3R5/SBF1/PIK3C2B/GDPD5/PI4KA/PIP4K2B/INPPL1/PI4K2B/FIG4/PIP5K1C/PNPLA6
REACTOME_SIGNALING_BY_ALK_IN_CANCER	REACTOME_SIGNALING_BY_ALK_IN_CANCER	43	0.145797	0.356354	1	1	0.947599	2336	tags=19%, list=29%, signal=13%	IL10RA/ZAP70/KLC1/HIP1/MSN/ZC3HC1/PTPN6/AGO4
REACTOME_TNFR1_INDUCED_PROAPOPTOTIC_SIGNALING	REACTOME_TNFR1_INDUCED_PROAPOPTOTIC_SIGNALING	15	0.16699	0.355675	1	1	0.947599	2428	tags=27%, list=30%, signal=19%	IKBKE/TRADD/FADD/TRAF2
REACTOME_PROTEIN_METHYLATION	REACTOME_PROTEIN_METHYLATION	10	0.178074	0.352559	0.998679	1	0.947599	6615	tags=100%, list=82%, signal=18%	EEF2KMT/VCPKMT/RPS2/CALM1/HSPA8/CAMKMT/EEF1A1/METTL21A/EEF1AKMT1/KIN
REACTOME_DEUBIQUITINATION	REACTOME_DEUBIQUITINATION	129	0.134056	0.351336	1	1	0.947599	594	tags=3%, list=7%, signal=3%	AXIN2/CCNA1/KAT2B/CDC25A
REACTOME_MITOCHONDRIAL_PROTEIN_DEGRADATION	REACTOME_MITOCHONDRIAL_PROTEIN_DEGRADATION	51	0.140463	0.349102	1	1	0.947599	6923	tags=100%, list=86%, signal=14%	HMGCS2/NDUFA13/LONP1/ACAD8/BDH1/PDHA1/SPG7/OXSM/CLPP/HTRA2/SLC25A6/HADH/PRKACA/OGDH/PRELID1/HSD17B10/NDUFV1/ALDH1B1/SSBP1/IARS2/FH/STARD7/HSPA9/UQCRC2/ALAS1/HSPD1/DLD/MDH2/DBT/OPA1/MRPS10/ATP5F1A/YME1L1/IDH3A/FECH/NDUFV3/NDUFA2/ATP5PO/COX4I1/ARG2/PMPCA/MICU2/TIMM17A/CHCHD2/ACOT2/NADK2/NDUFB6/CLPX/GLUD1/ALDH18A1/MRPL32
REACTOME_RNA_POLYMERASE_II_TRANSCRIPTION_TERMINATION	REACTOME_RNA_POLYMERASE_II_TRANSCRIPTION_TERMINATION	29	0.147591	0.346191	0.998864	1	0.947599	465	tags=3%, list=6%, signal=3%	U2AF1
REACTOME_TRANSLATION_OF_SARS_COV_1_STRUCTURAL_PROTEINS	REACTOME_TRANSLATION_OF_SARS_COV_1_STRUCTURAL_PROTEINS	14	0.162973	0.343673	1	1	0.947599	6737	tags=100%, list=84%, signal=16%	ST3GAL4/ST3GAL2/PARP16/PARP8/ST6GALNAC2/GSK3A/UBE2I/PARP4/GSK3B/UBA52/SUMO1/PARP9/GALNT1/CANX
REACTOME_MITOTIC_PROPHASE	REACTOME_MITOTIC_PROPHASE	49	0.13593	0.336428	1	1	0.947599	3759	tags=43%, list=47%, signal=23%	CCNB2/NUP210/NCAPG2/PRKCA/VRK1/NCAPH2/NCAPD3/LEMD2/PHF8/NUP85/RAB1B/EMD/POM121C/MAPK3/GOLGA2/NUP188/NUMA1/KMT5A/NUP62/ENSA/NUP153
REACTOME_NS1_MEDIATED_EFFECTS_ON_HOST_PATHWAYS	REACTOME_NS1_MEDIATED_EFFECTS_ON_HOST_PATHWAYS	24	0.142963	0.32782	0.998844	1	0.947599	2141	tags=17%, list=27%, signal=12%	NUP210/KPNA5/PABPN1/KPNA7
REACTOME_VIRAL_INFECTION_PATHWAYS	REACTOME_VIRAL_INFECTION_PATHWAYS	395	0.120018	0.323664	1	1	0.947599	209	tags=1%, list=3%, signal=1%	ANO3/LCK/MGAT4C/ITGA4/FXYD6
REACTOME_FCGAMMA_RECEPTOR_FCGR_DEPENDENT_PHAGOCYTOSIS	REACTOME_FCGAMMA_RECEPTOR_FCGR_DEPENDENT_PHAGOCYTOSIS	47	0.128862	0.317417	1	1	0.947599	1318	tags=9%, list=16%, signal=7%	PLPP4/WAS/PLA2G6/ITPR1
REACTOME_SUMOYLATION_OF_CHROMATIN_ORGANIZATION_PROTEINS	REACTOME_SUMOYLATION_OF_CHROMATIN_ORGANIZATION_PROTEINS	29	0.134538	0.315575	0.998864	1	0.947599	4608	tags=76%, list=57%, signal=33%	NUP210/PHC1/CHD3/CBX2/RING1/ZBED1/NUP85/POM121C/NUP188/NUP62/UBE2I/NUP153/NUP88/SUMO3/NUP98/SEH1L/PIAS1/NUP58/TPR/HDAC2/NUP50/SATB1
REACTOME_MATERNAL_TO_ZYGOTIC_TRANSITION_MZT	REACTOME_MATERNAL_TO_ZYGOTIC_TRANSITION_MZT	30	0.130623	0.309185	1	1	0.947599	1013	tags=7%, list=13%, signal=6%	TEAD4/NPM2
REACTOME_TRANSPORT_OF_MATURE_TRANSCRIPT_TO_CYTOPLASM	REACTOME_TRANSPORT_OF_MATURE_TRANSCRIPT_TO_CYTOPLASM	39	0.122879	0.299034	1	1	0.947599	1054	tags=5%, list=13%, signal=4%	U2AF1/NUP210
REACTOME_MRNA_SPLICING	REACTOME_MRNA_SPLICING	108	0.108118	0.282756	1	1	0.947599	7017	tags=99%, list=87%, signal=13%	U2AF1/SNRPG/LENG1/HNRNPD/SRSF12/POLR2I/CACTIN/SART1/GPKOW/YJU2/SF3A2/SRSF9/PPIL2/HNRNPA2B1/PCBP1/RBM10/POLR2J/PQBP1/SNRPA/CHERP/CCDC12/SNRNP70/DDX41/FUS/U2AF2/SRRT/DDX23/PRPF6/PTBP1/HNRNPH1/PRPF31/SNRNP200/PUF60/DHX16/POLR2E/DHX38/HNRNPL/SNRPF/PCBP2/TXNL4A/MAGOH/PDCD7/RBM25/POLR2A/PPWD1/ZNF830/XAB2/PRPF18/SF3B2/SUGP1/SNRPB2/SF3A3/PLRG1/GPATCH1/SF3B1/MFAP1/SRSF11/SNRNP25/SRSF3/LSM4/DHX15/SNRPD3/US…
REACTOME_REGULATION_OF_LIPID_METABOLISM_BY_PPARALPHA	REACTOME_REGULATION_OF_LIPID_METABOLISM_BY_PPARALPHA	58	0.110246	0.276384	1	1	0.947599	1103	tags=7%, list=14%, signal=6%	HMGCS2/SLC27A1/ARNT2/GPS2
